# Supplementary material for: Exploring the Genes of Yerba Mate (Ilex paraguariensis A. St.-Hil.) by NGS and De Novo Transcriptome Assembly
Source: PubMed Central journal article supplement (PMC4199719; doi:10.1371/journal.pone.0109835), 2014-10-16

2-OXOCARBOXYLIC ACID METABOLISM

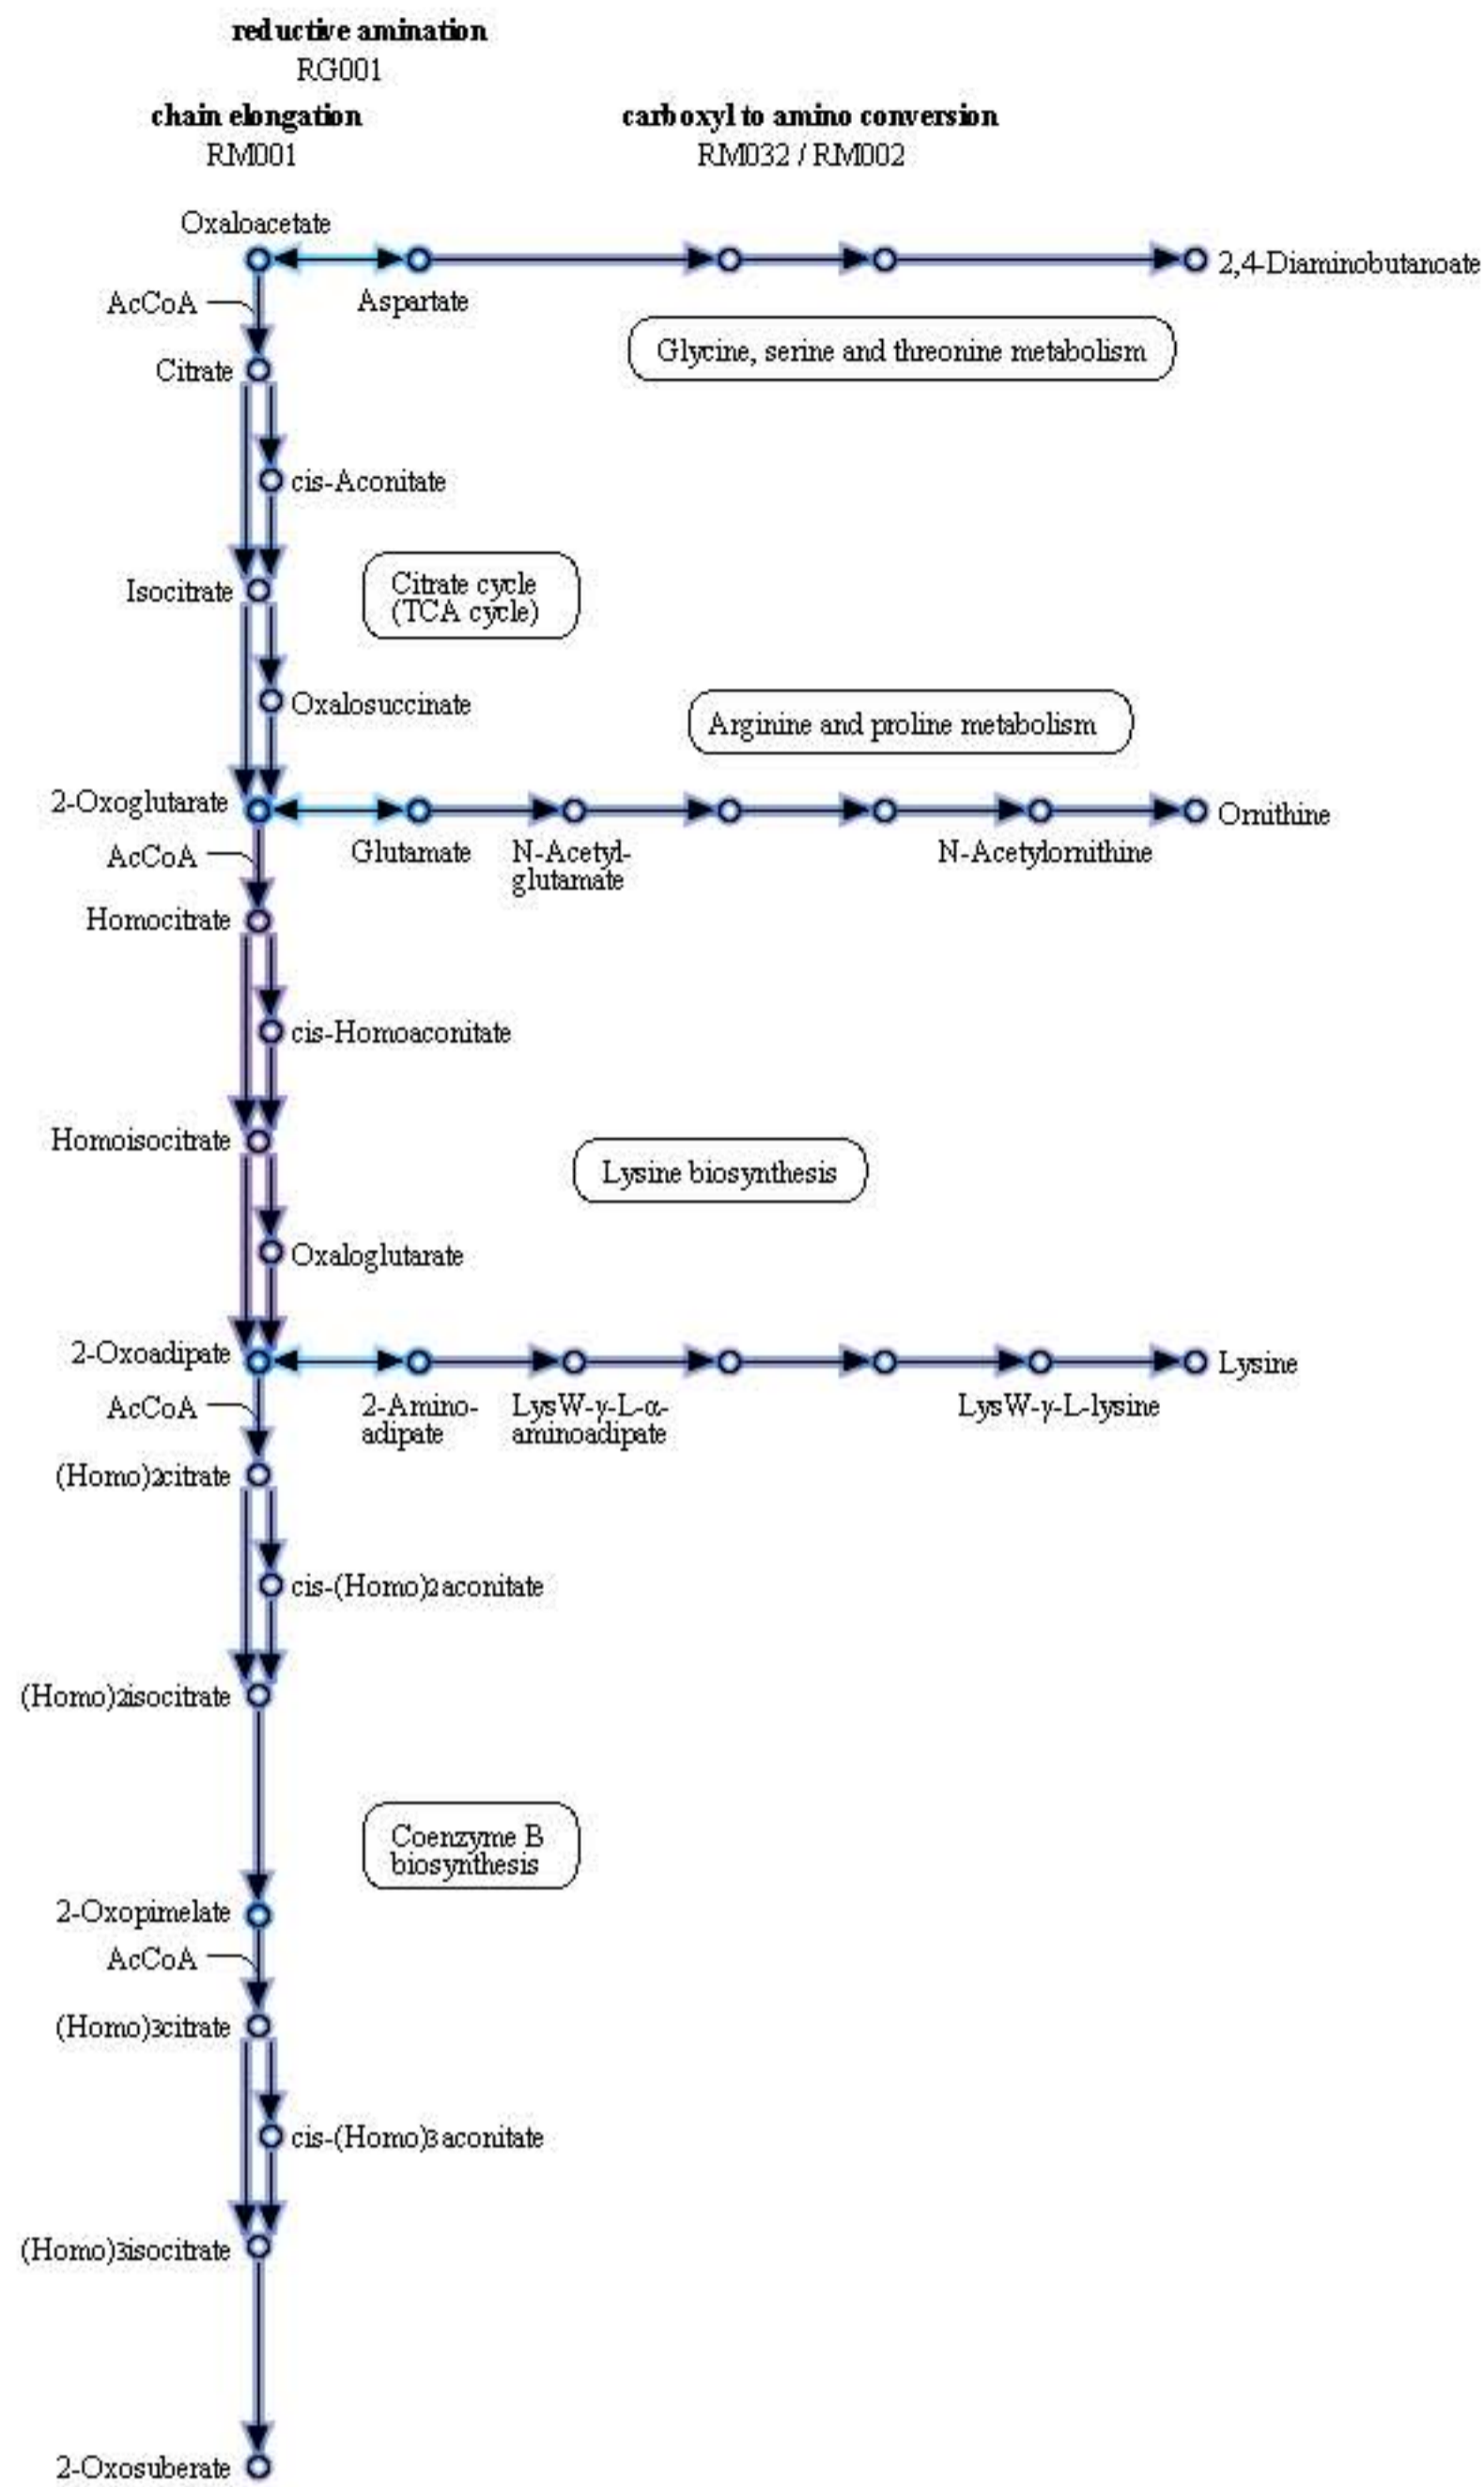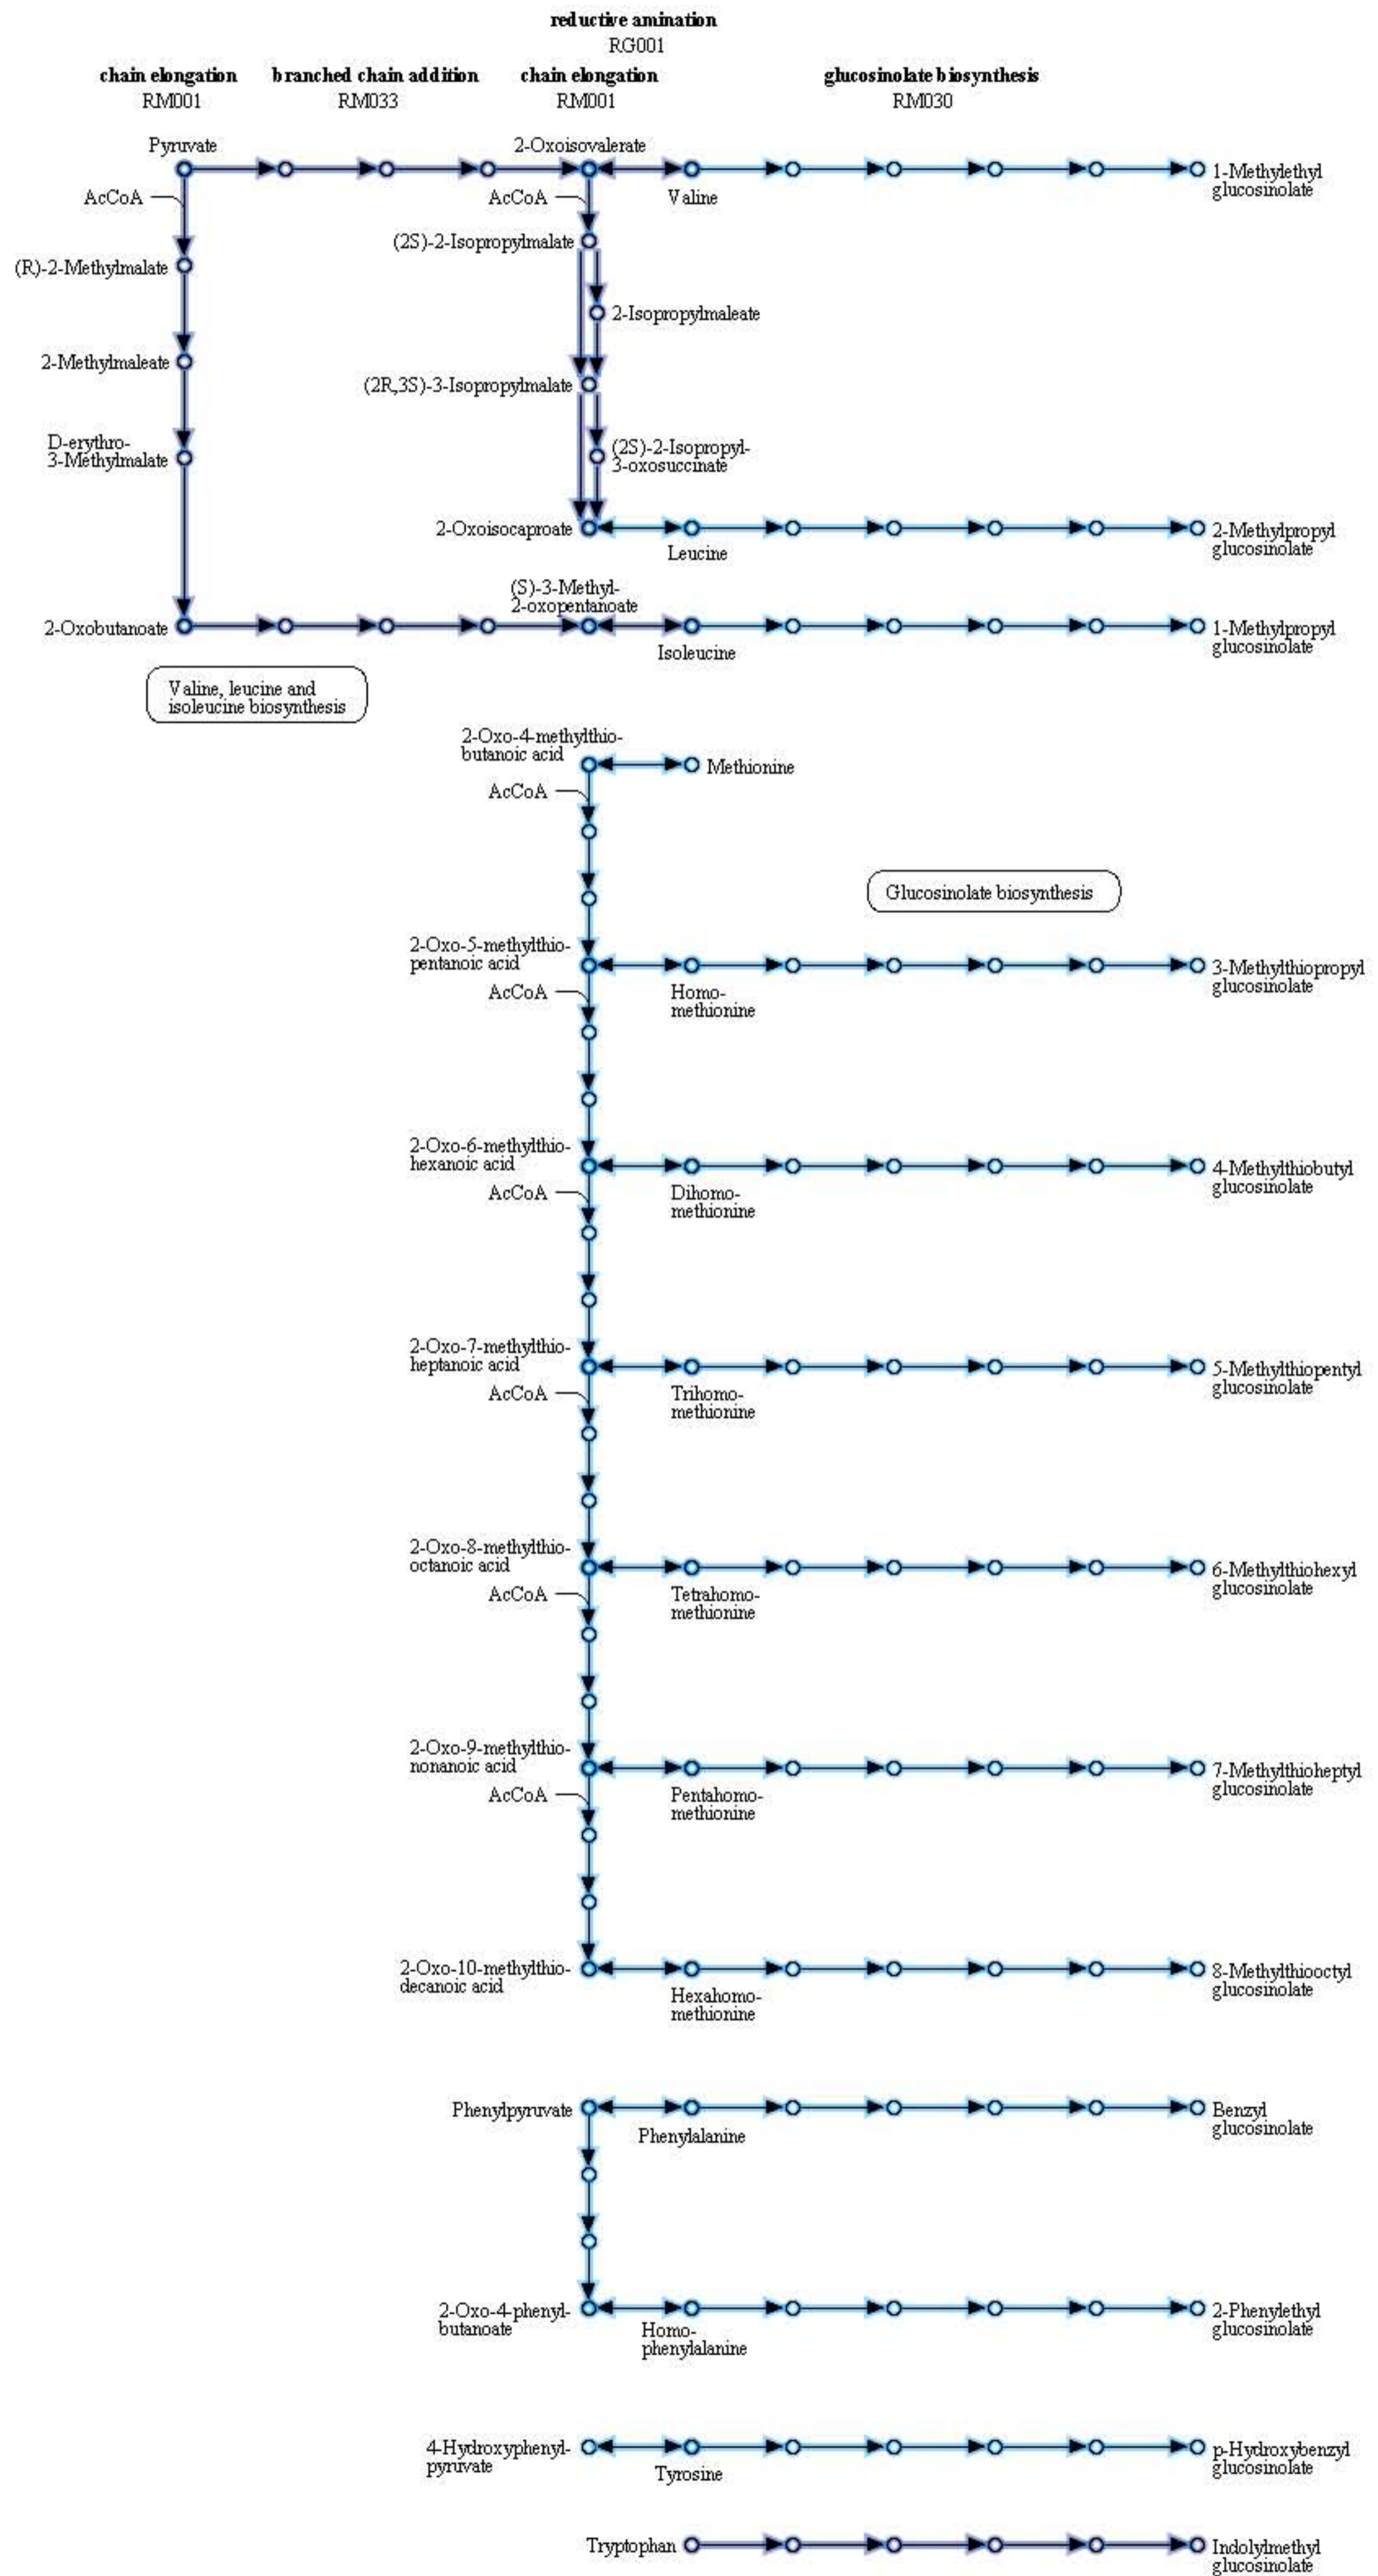



**ABC TRANSPORTERS**

**Prokaryotic-type ABC transporters**

**Mineral and organic ion transporters**

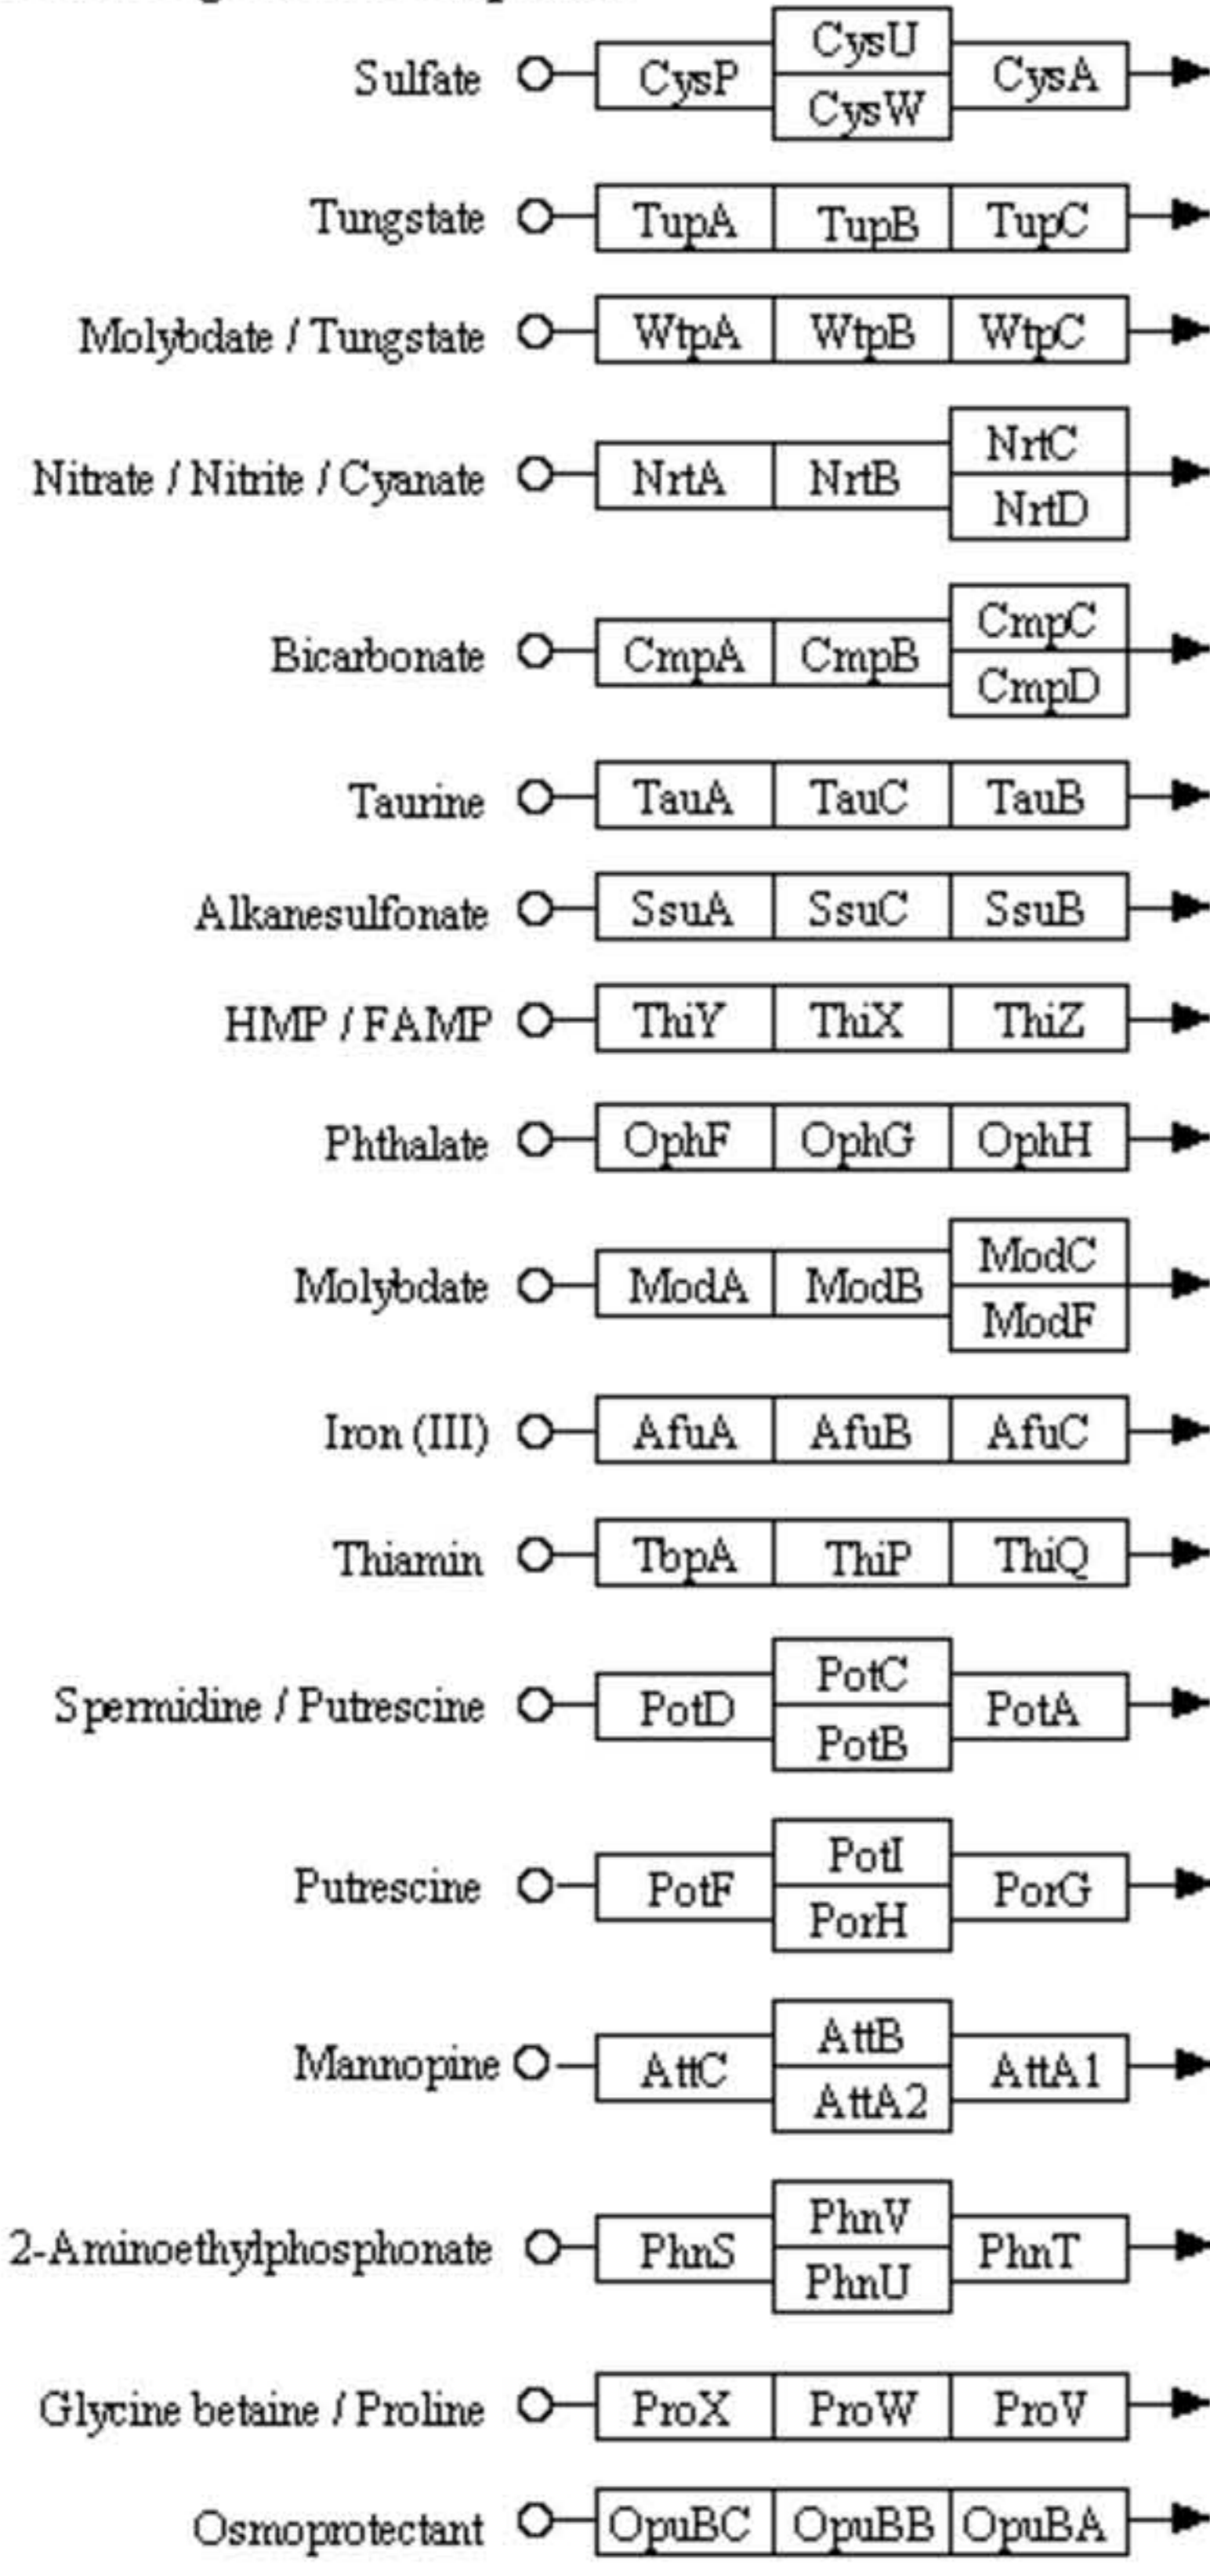

**Oligosaccharide and polyol transporters**

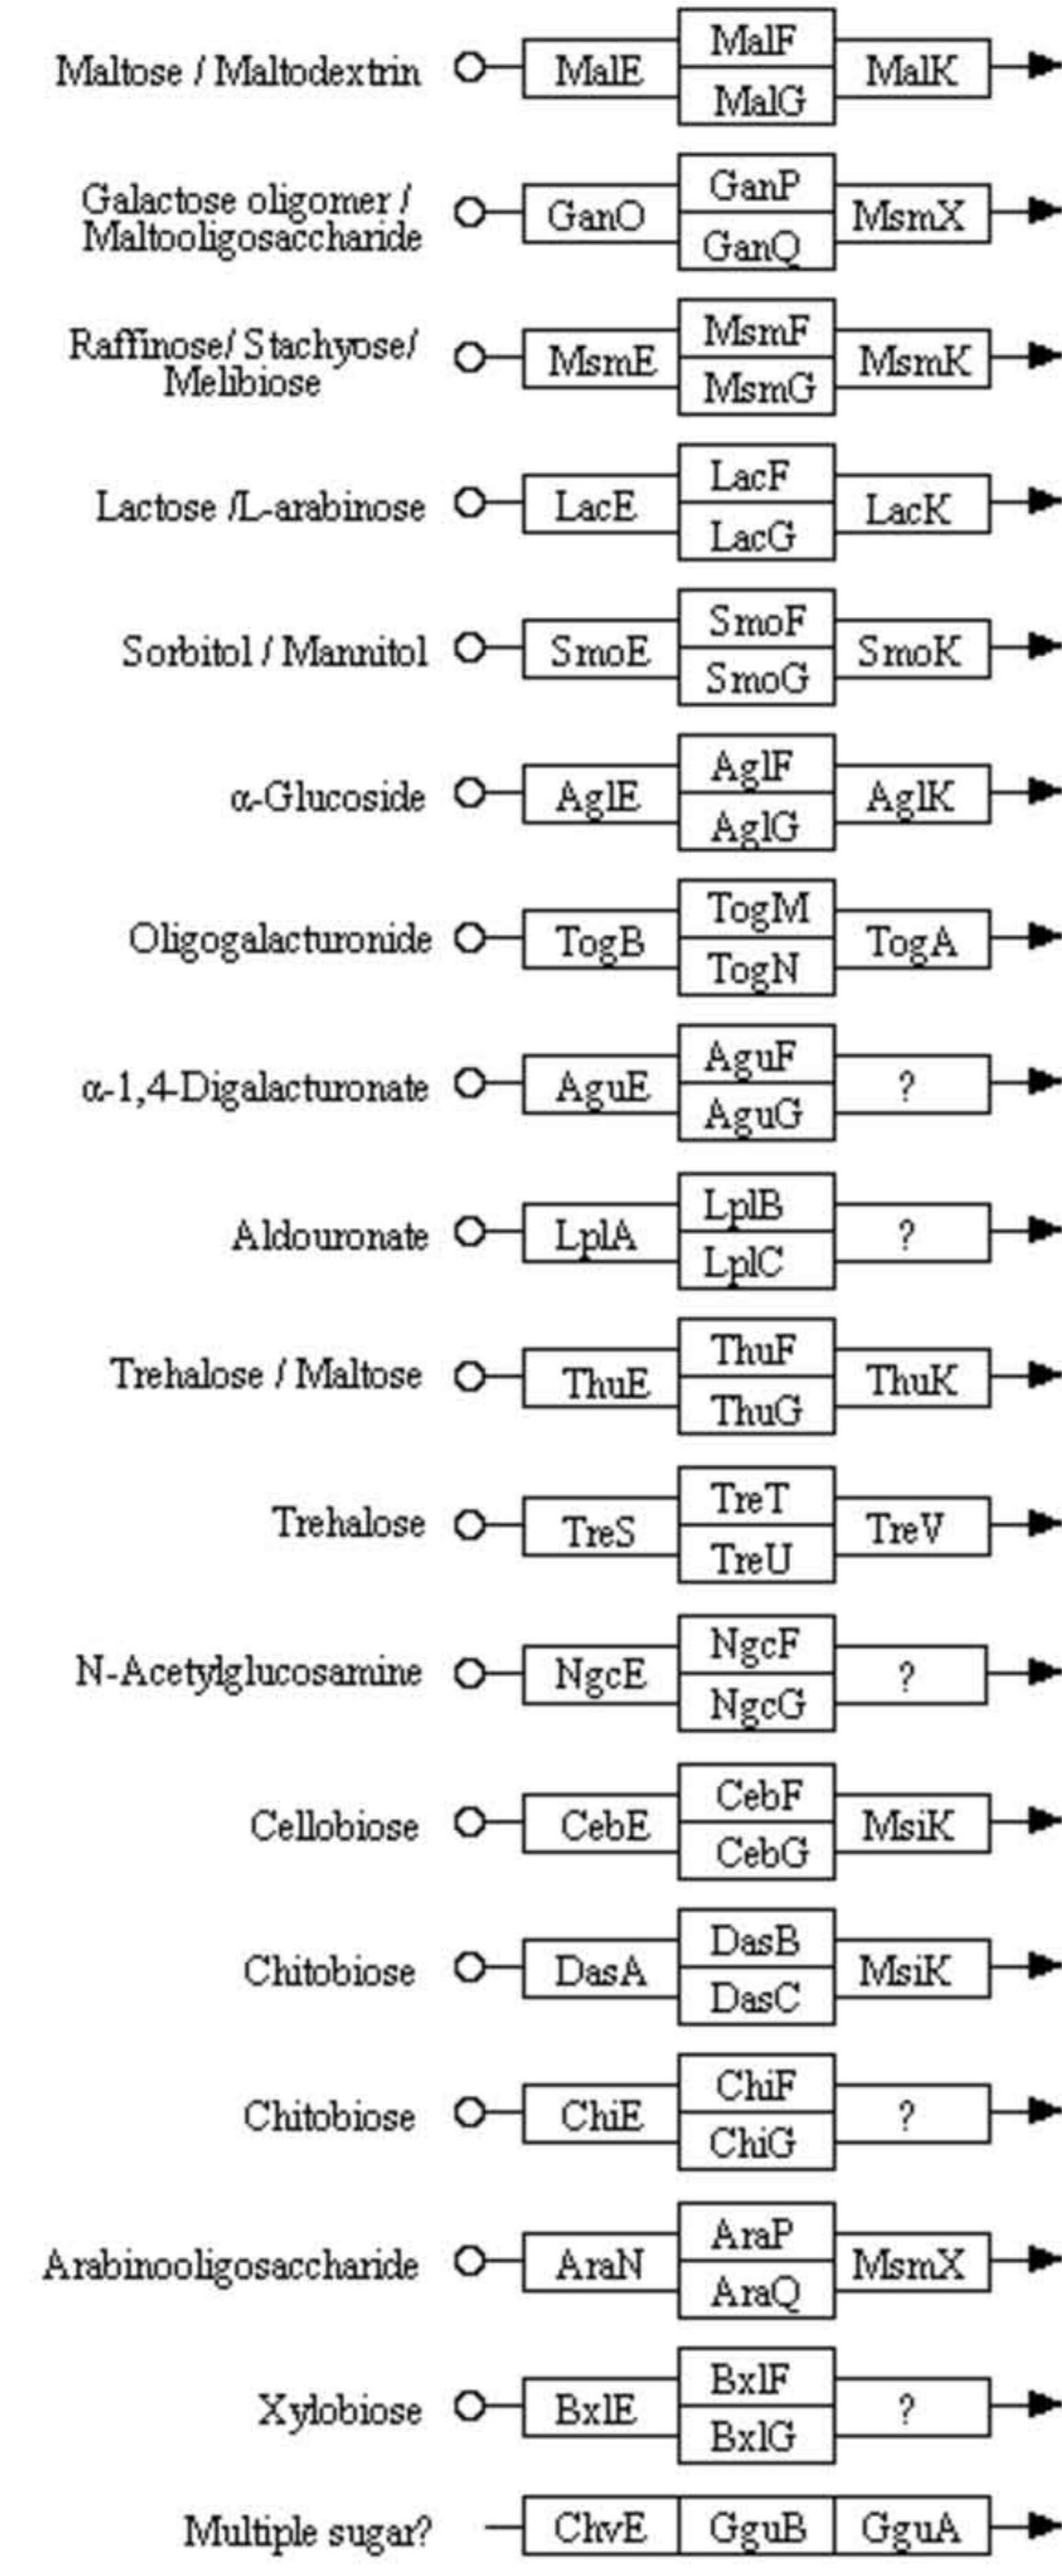

**Monosaccharide transporters**

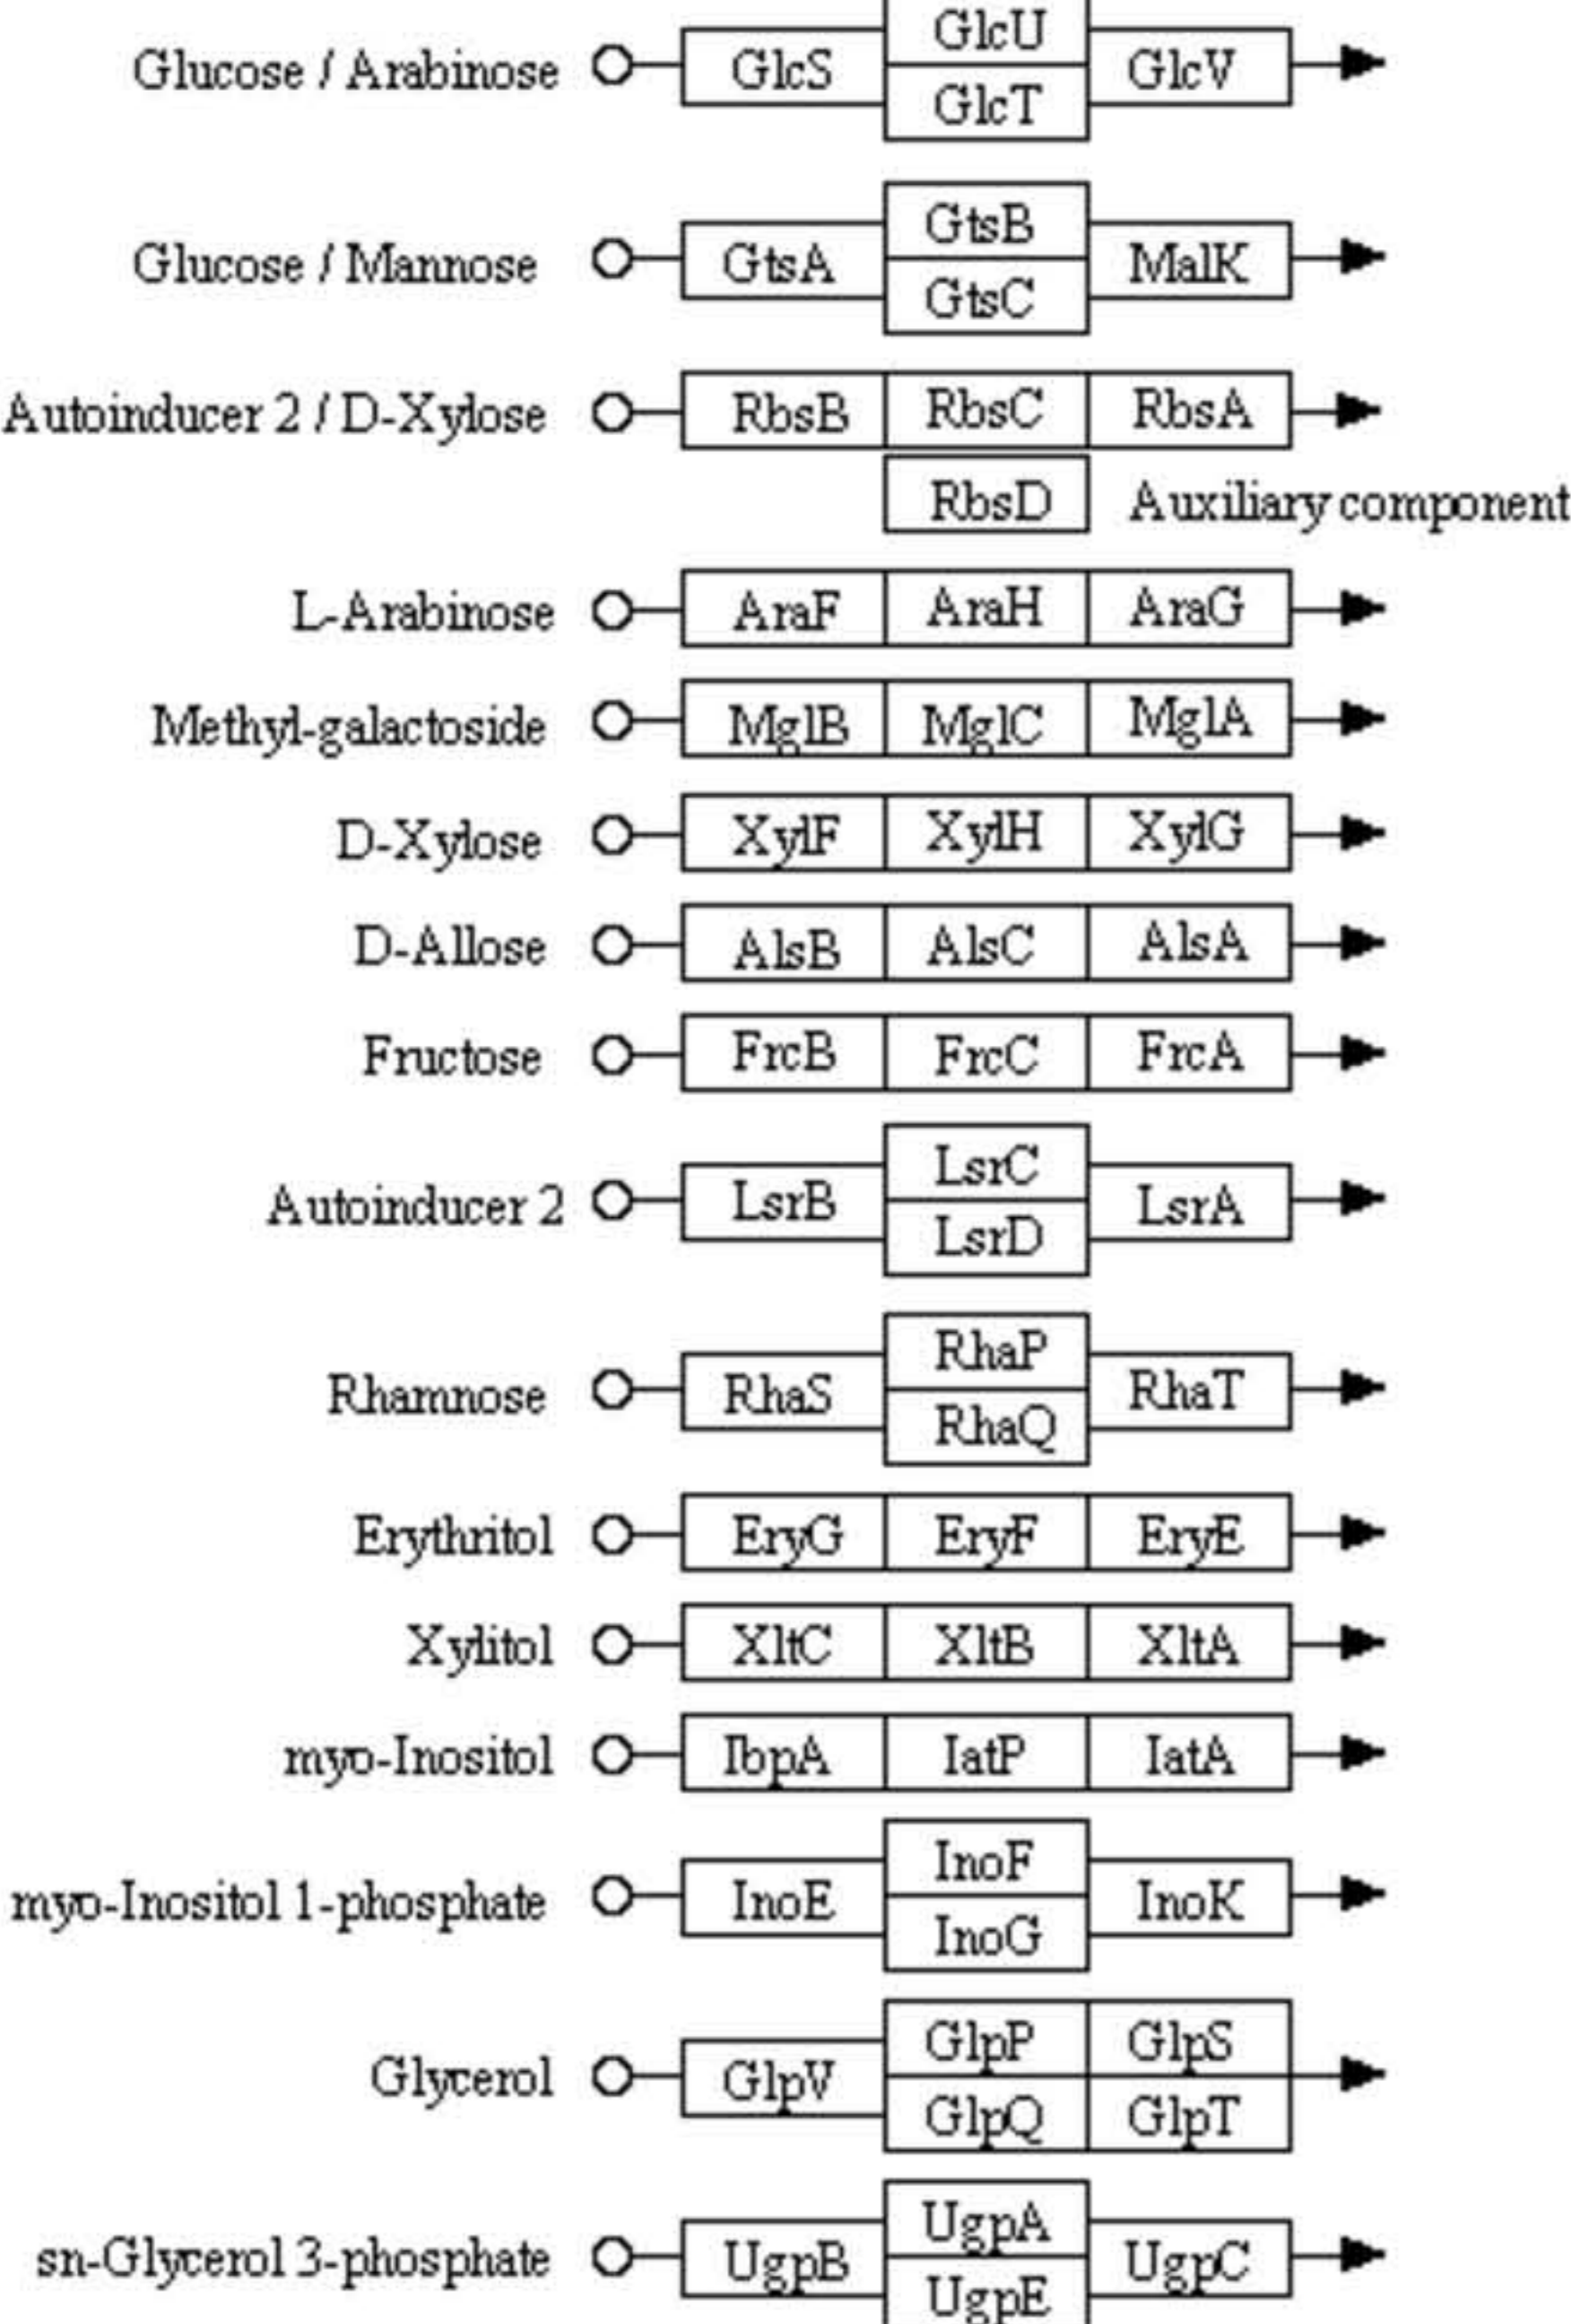

**Phosphate and amino acid transporters**

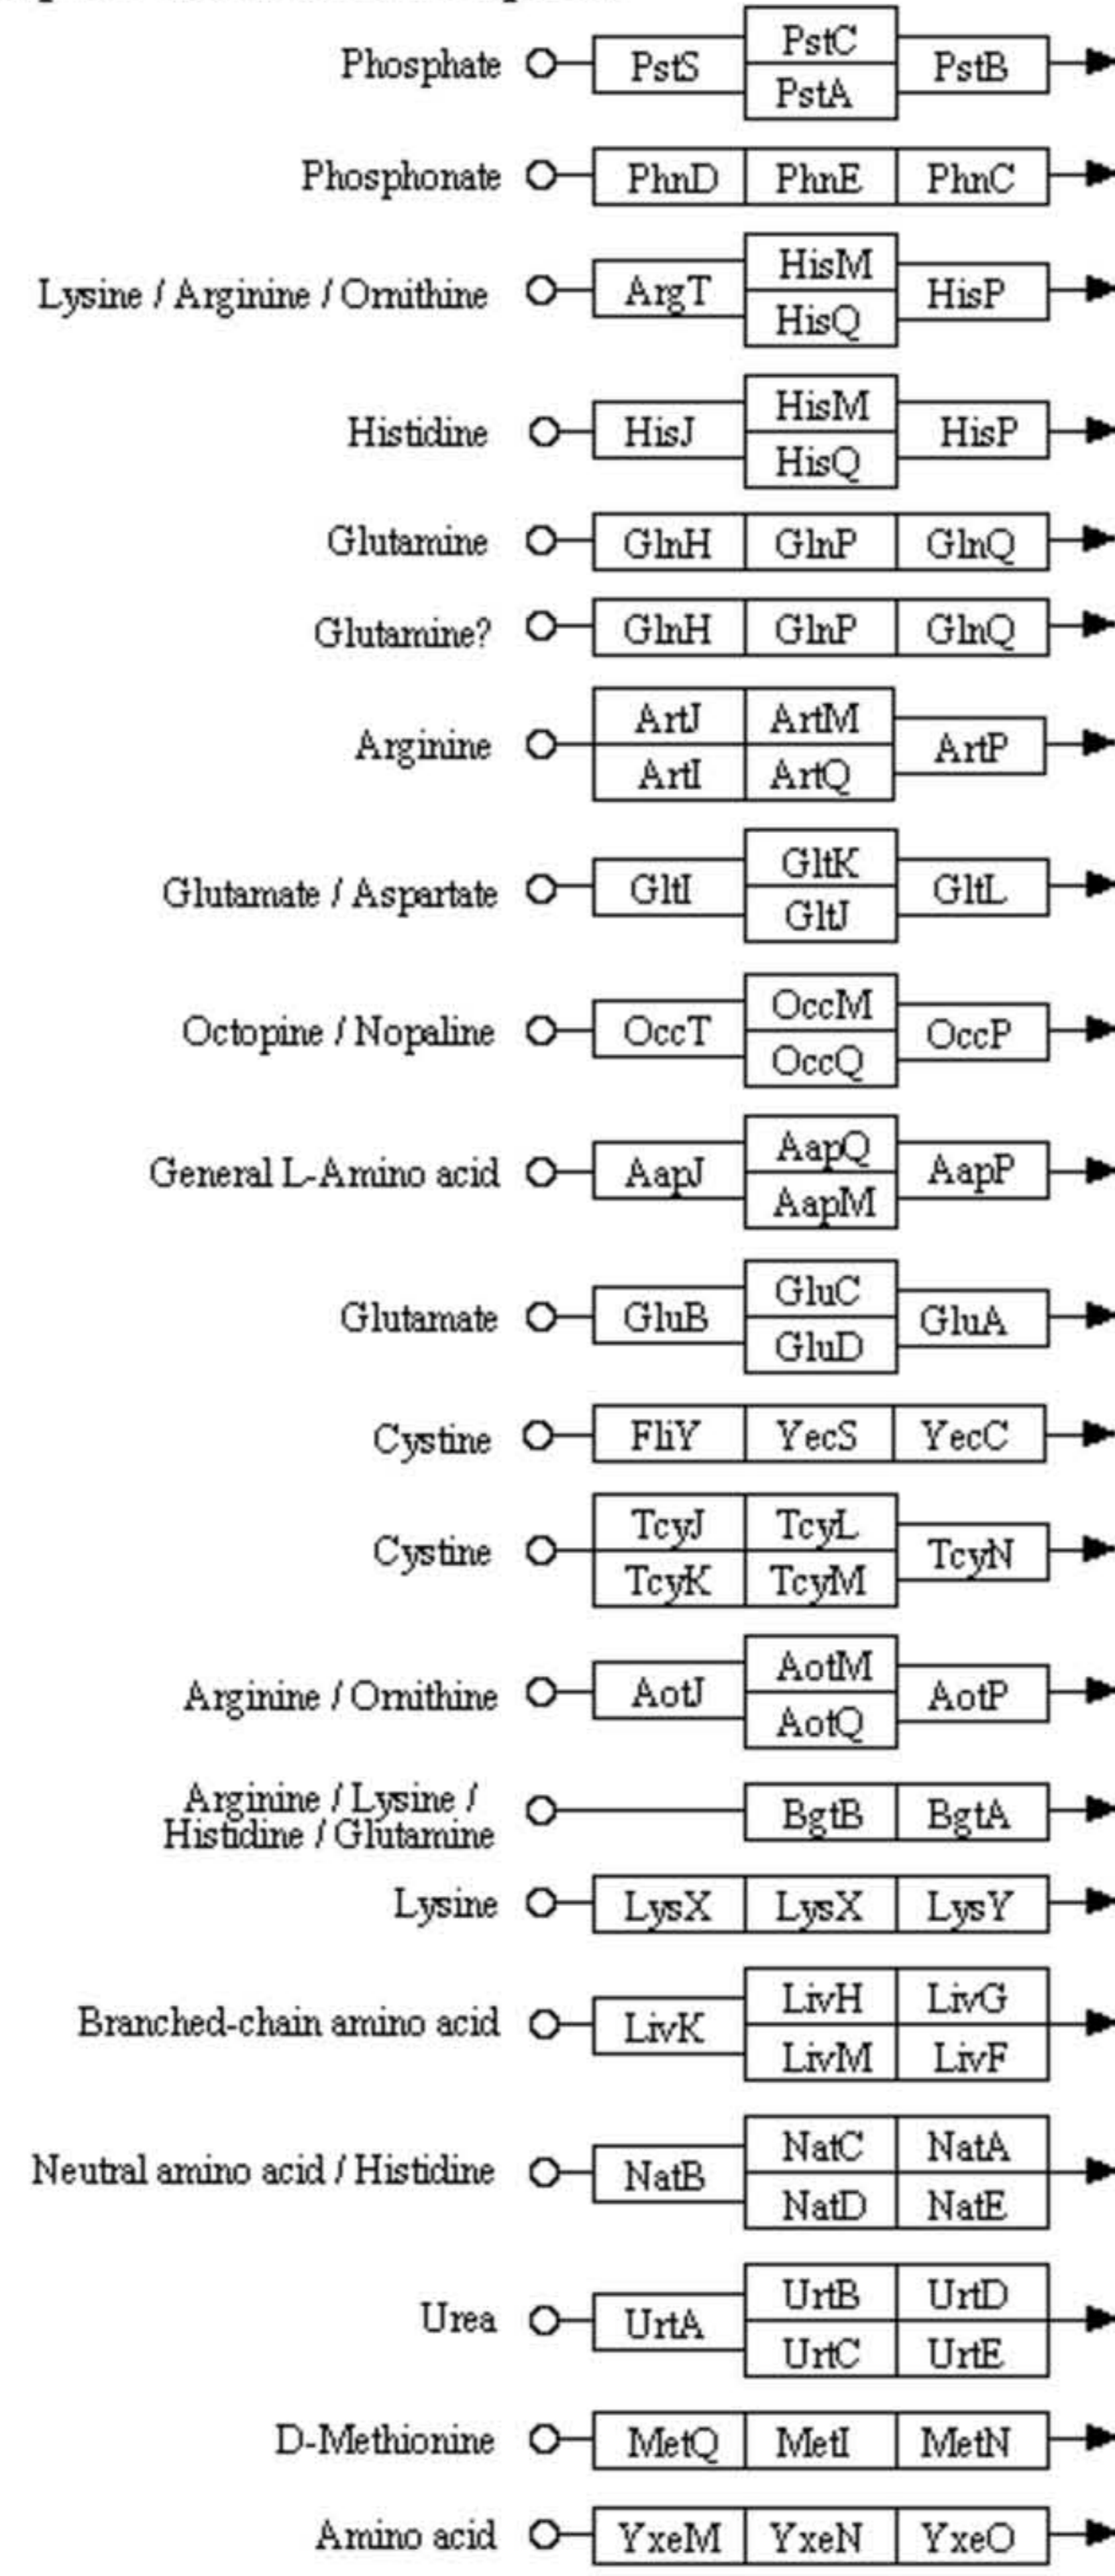

**Peptide and nickel transporters**

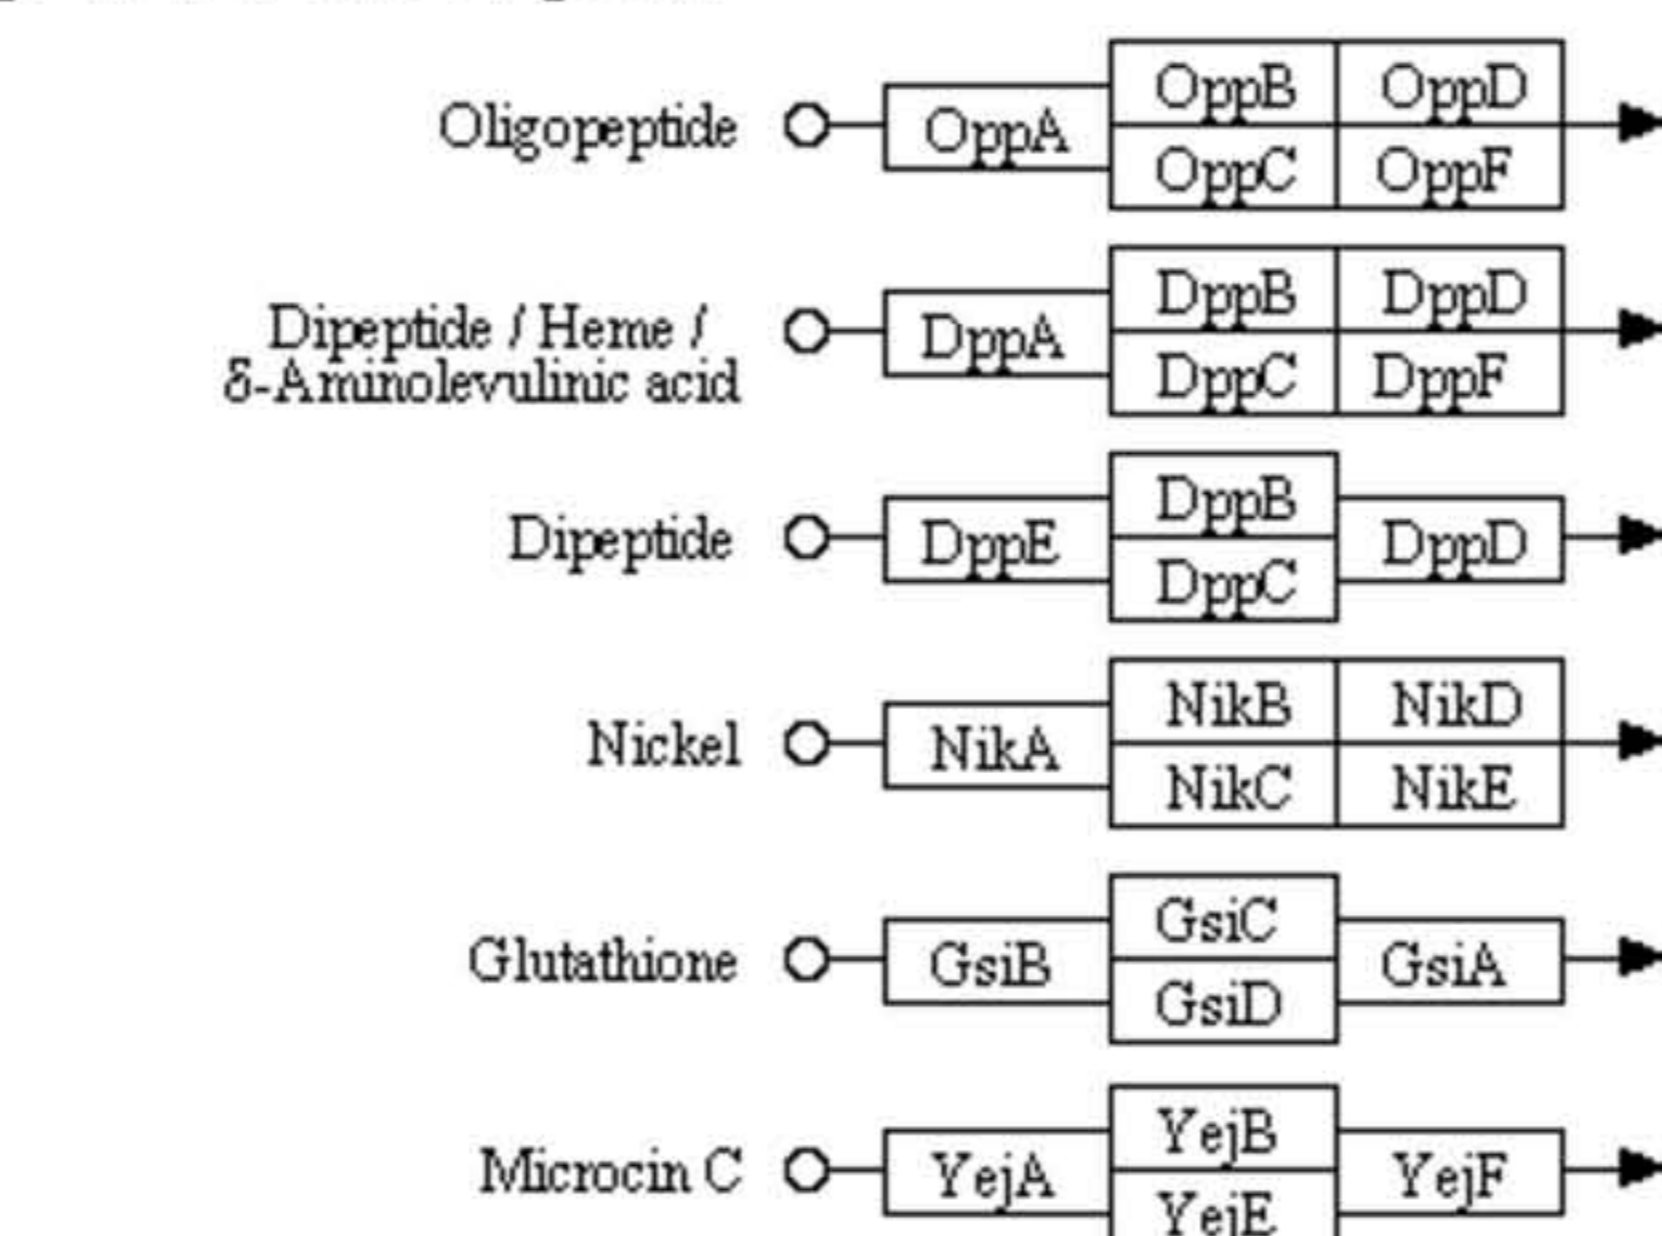

**Metallic cation, iron-siderophore and vitamin B12 transporters**

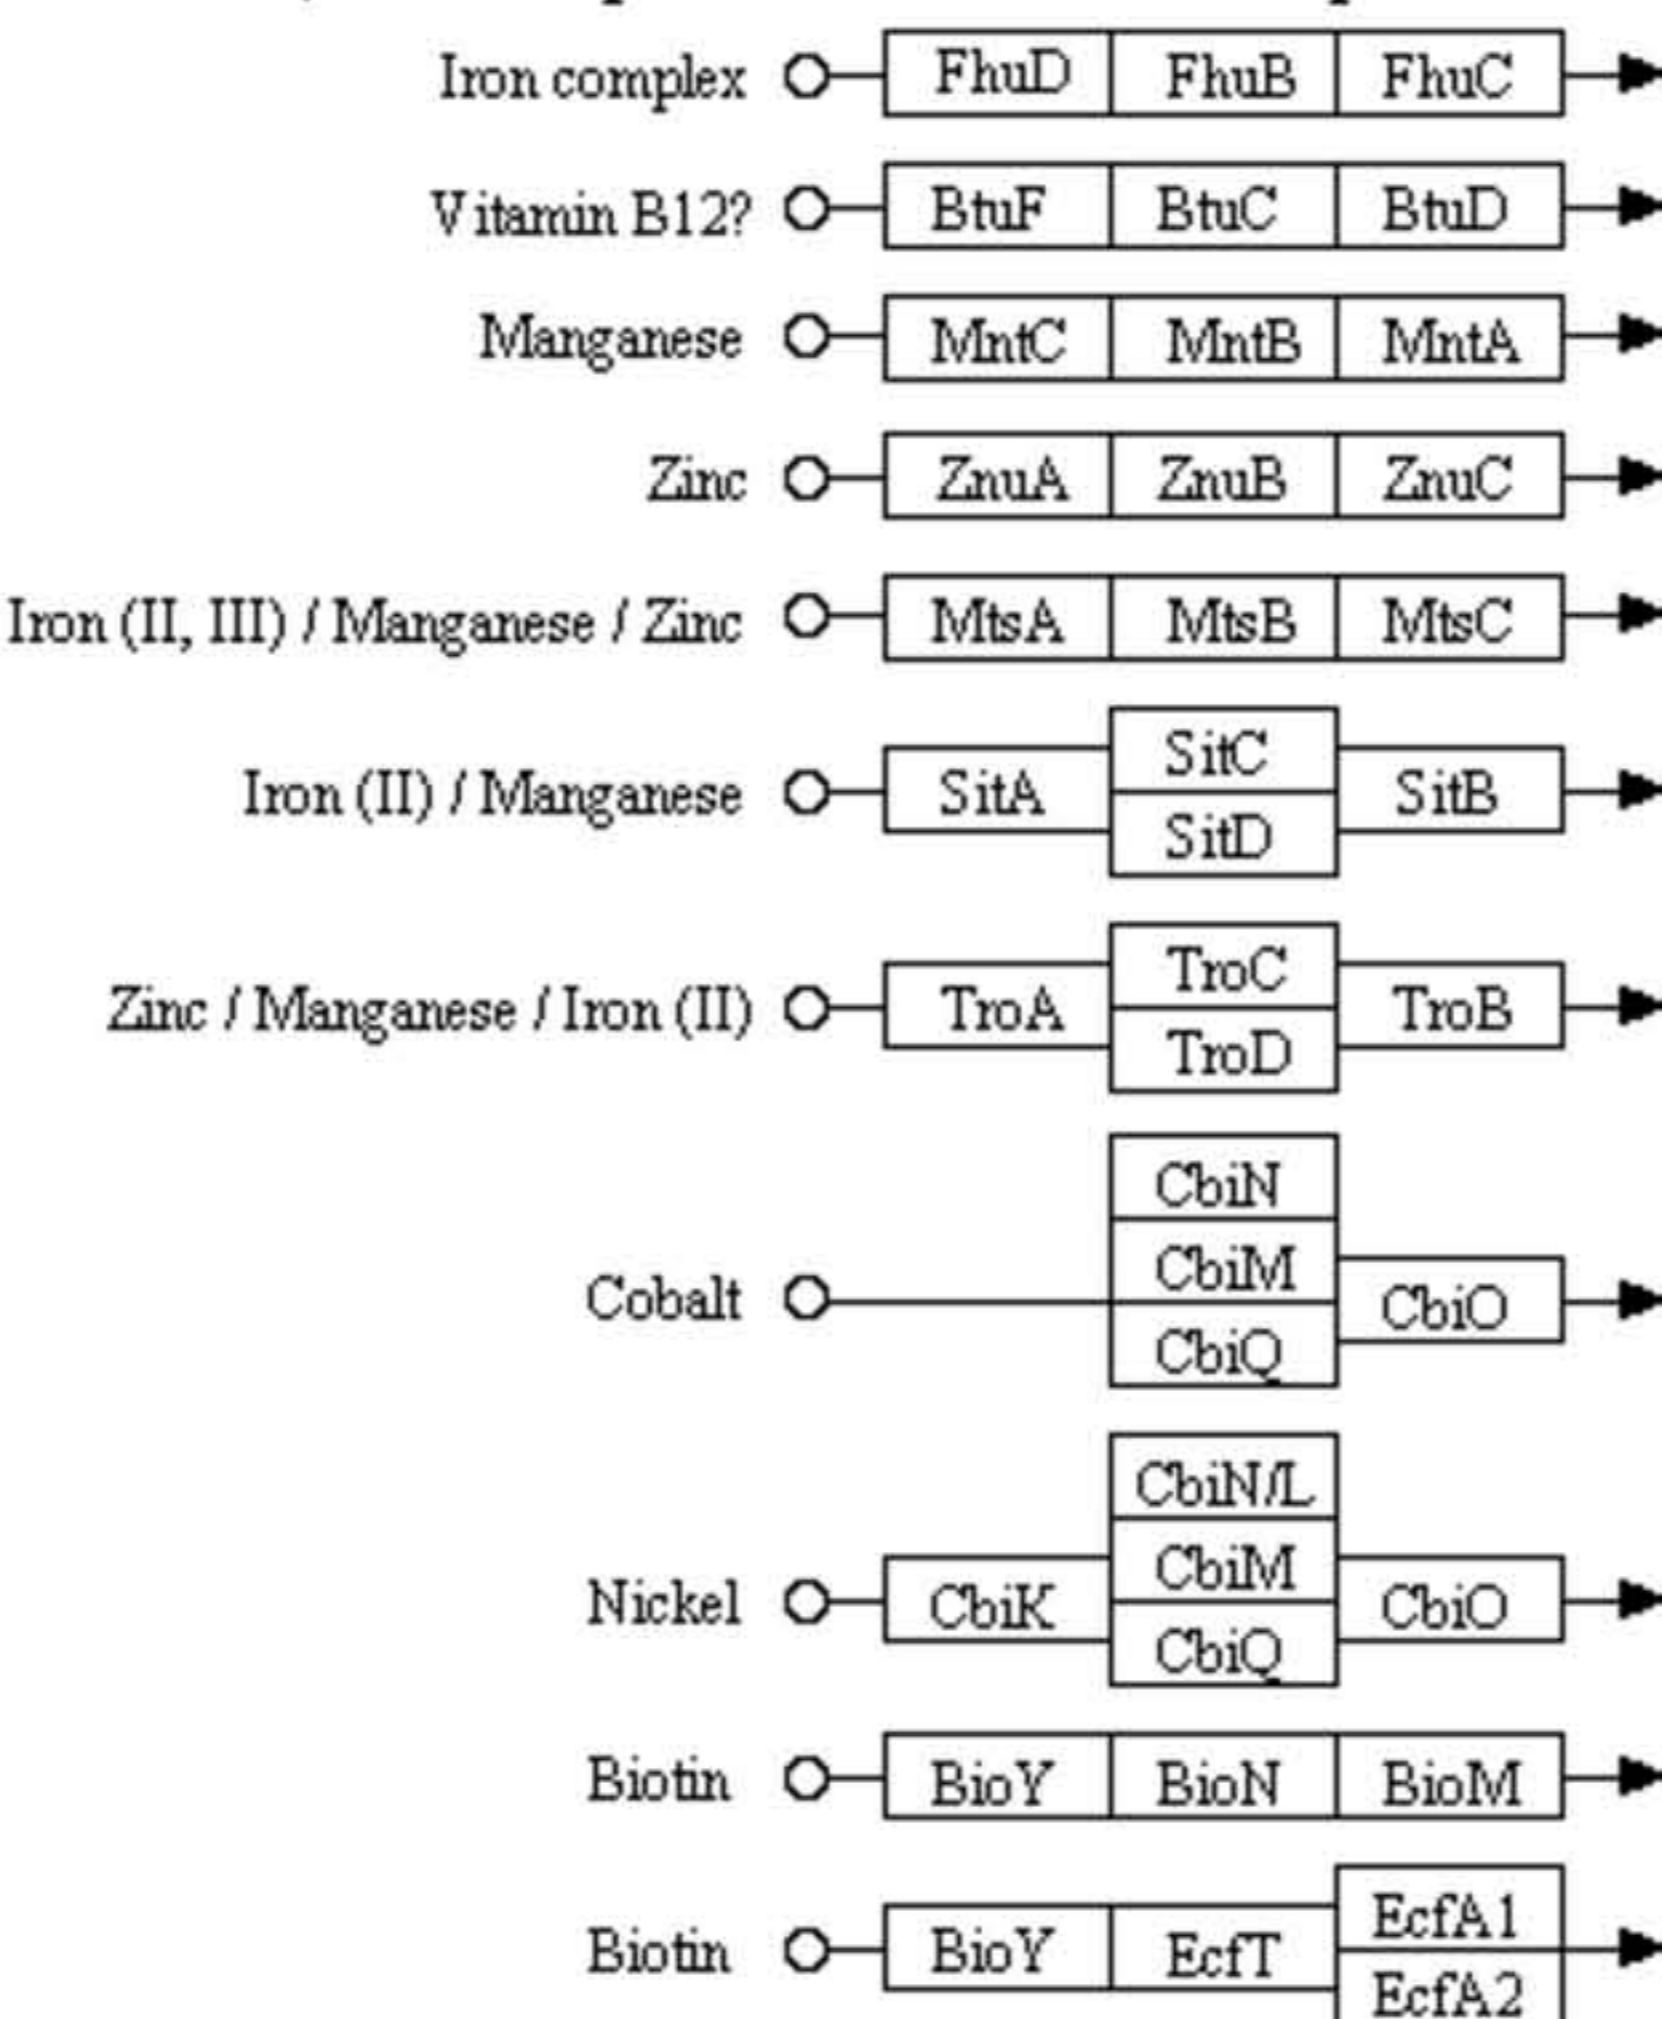

**ABC-2 and other transporters**

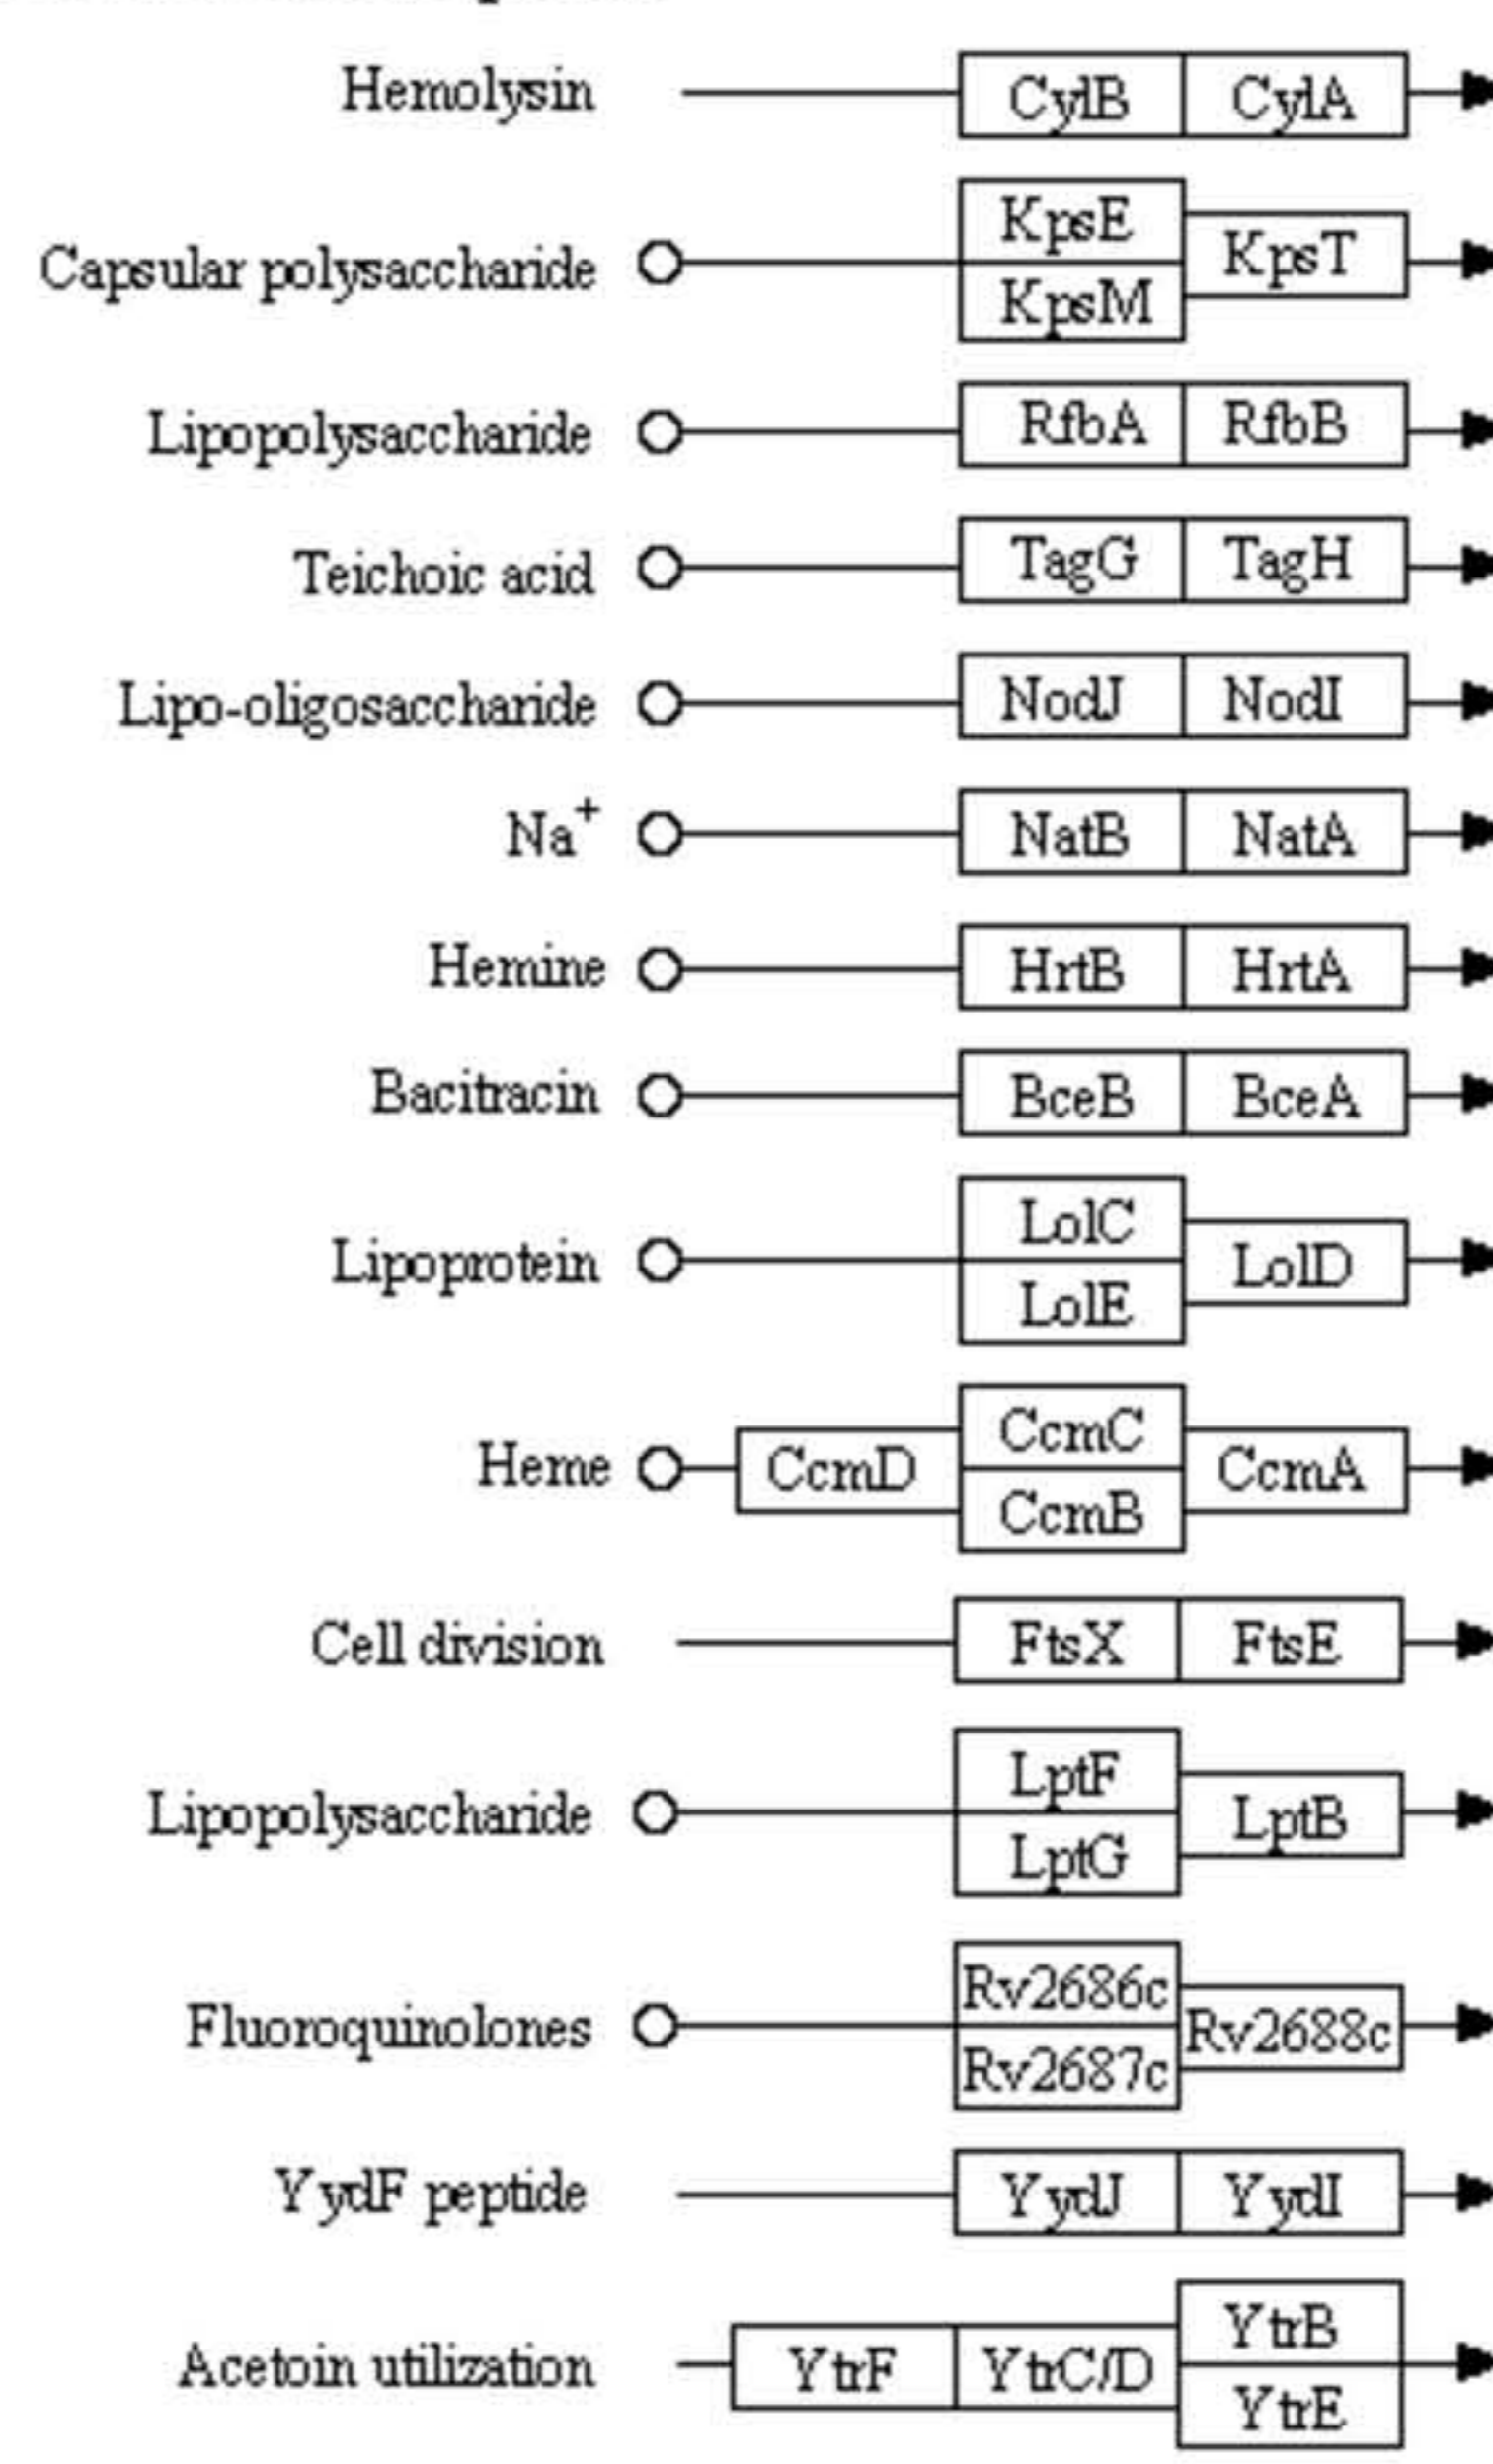

**Eukaryotic-type ABC transporters**

**ABCA Sub family**

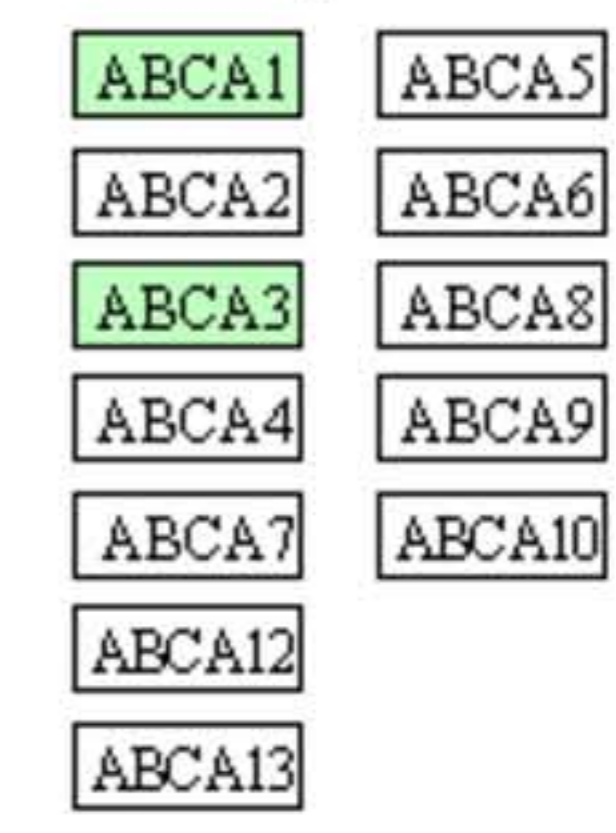

**ABCB Sub family**

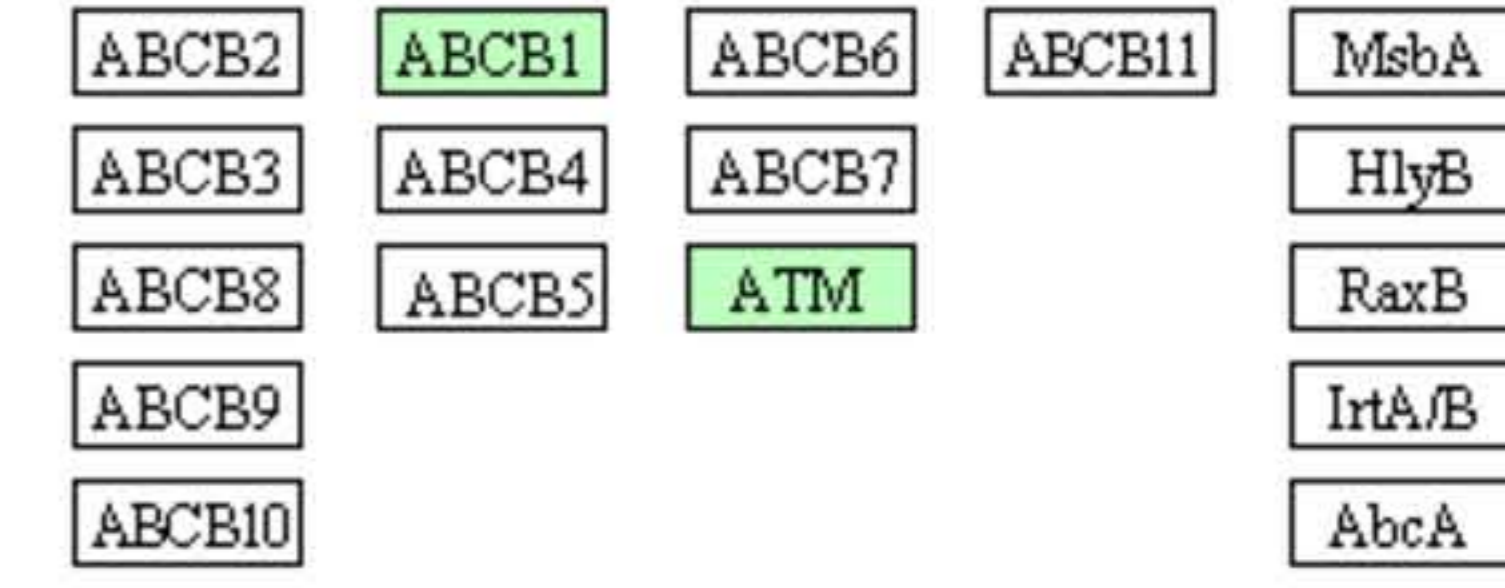

**ABCC Sub family**

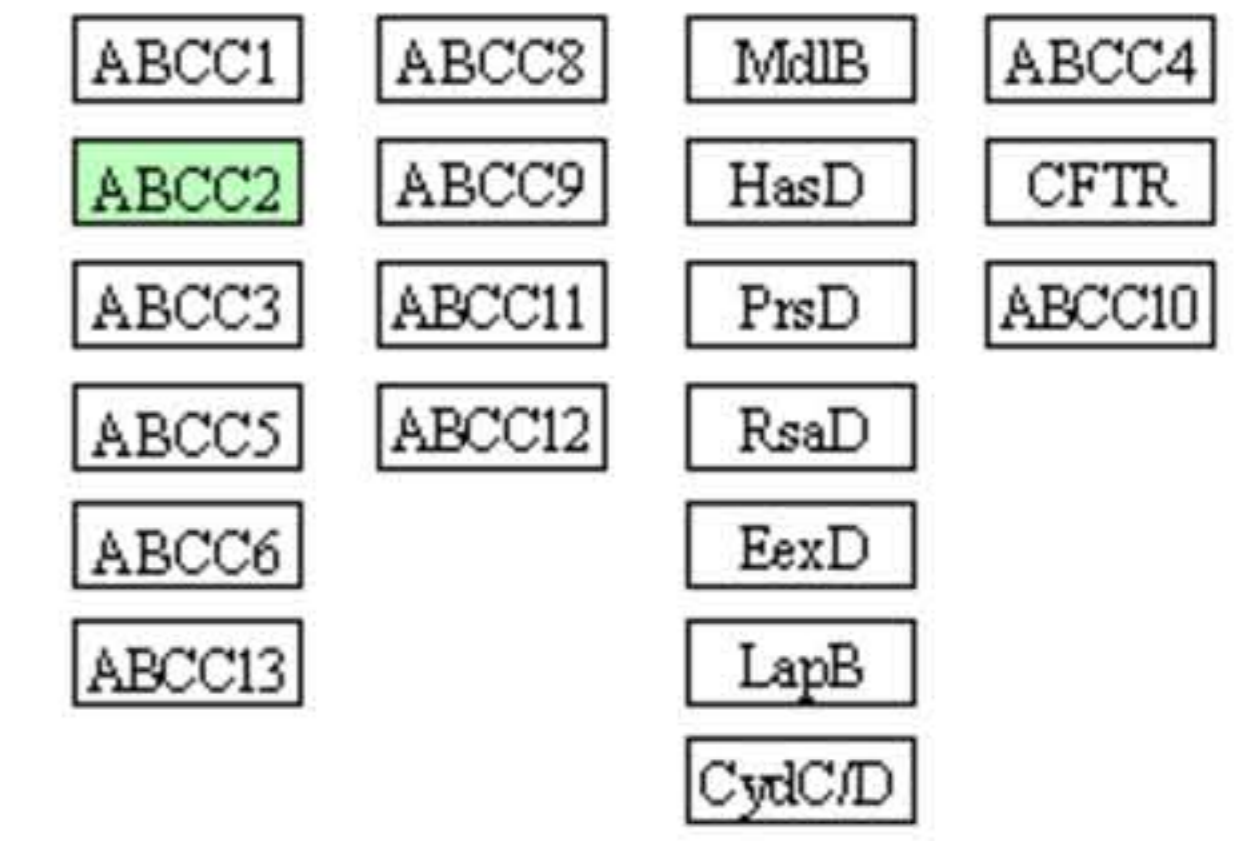

**ABCD Sub family**

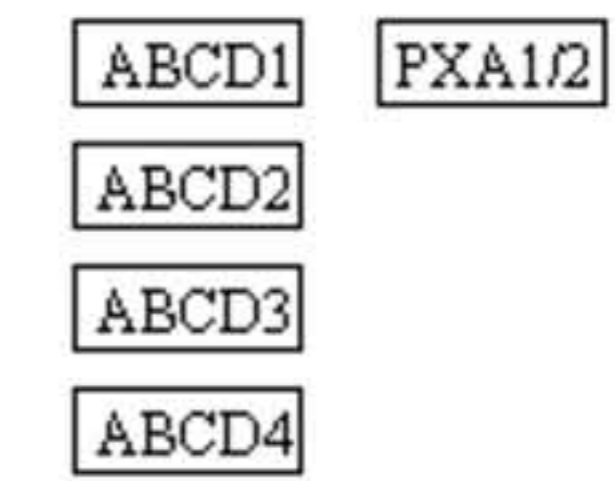

**ABCG Sub family**

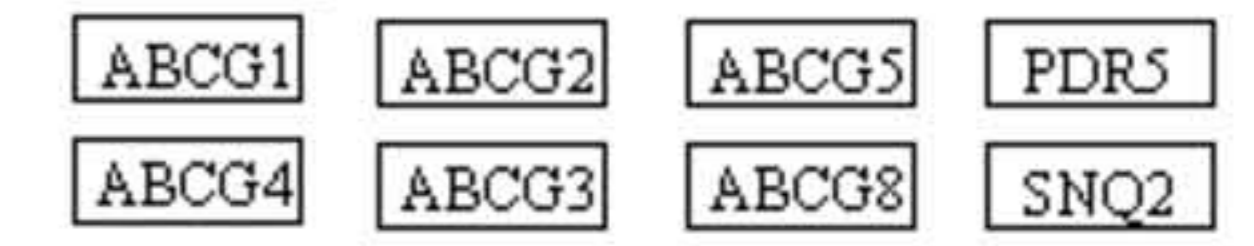

**Macrolide exporters**

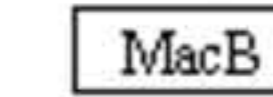

**Other putative ABC transporters**

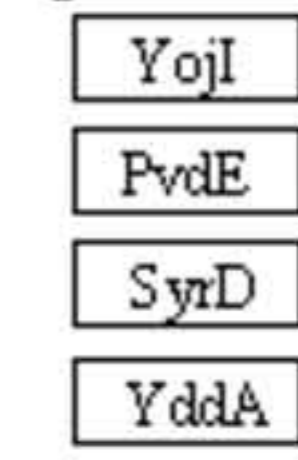



# ALANINE, ASPARTATE AND GLUTAMATE METABOLISM

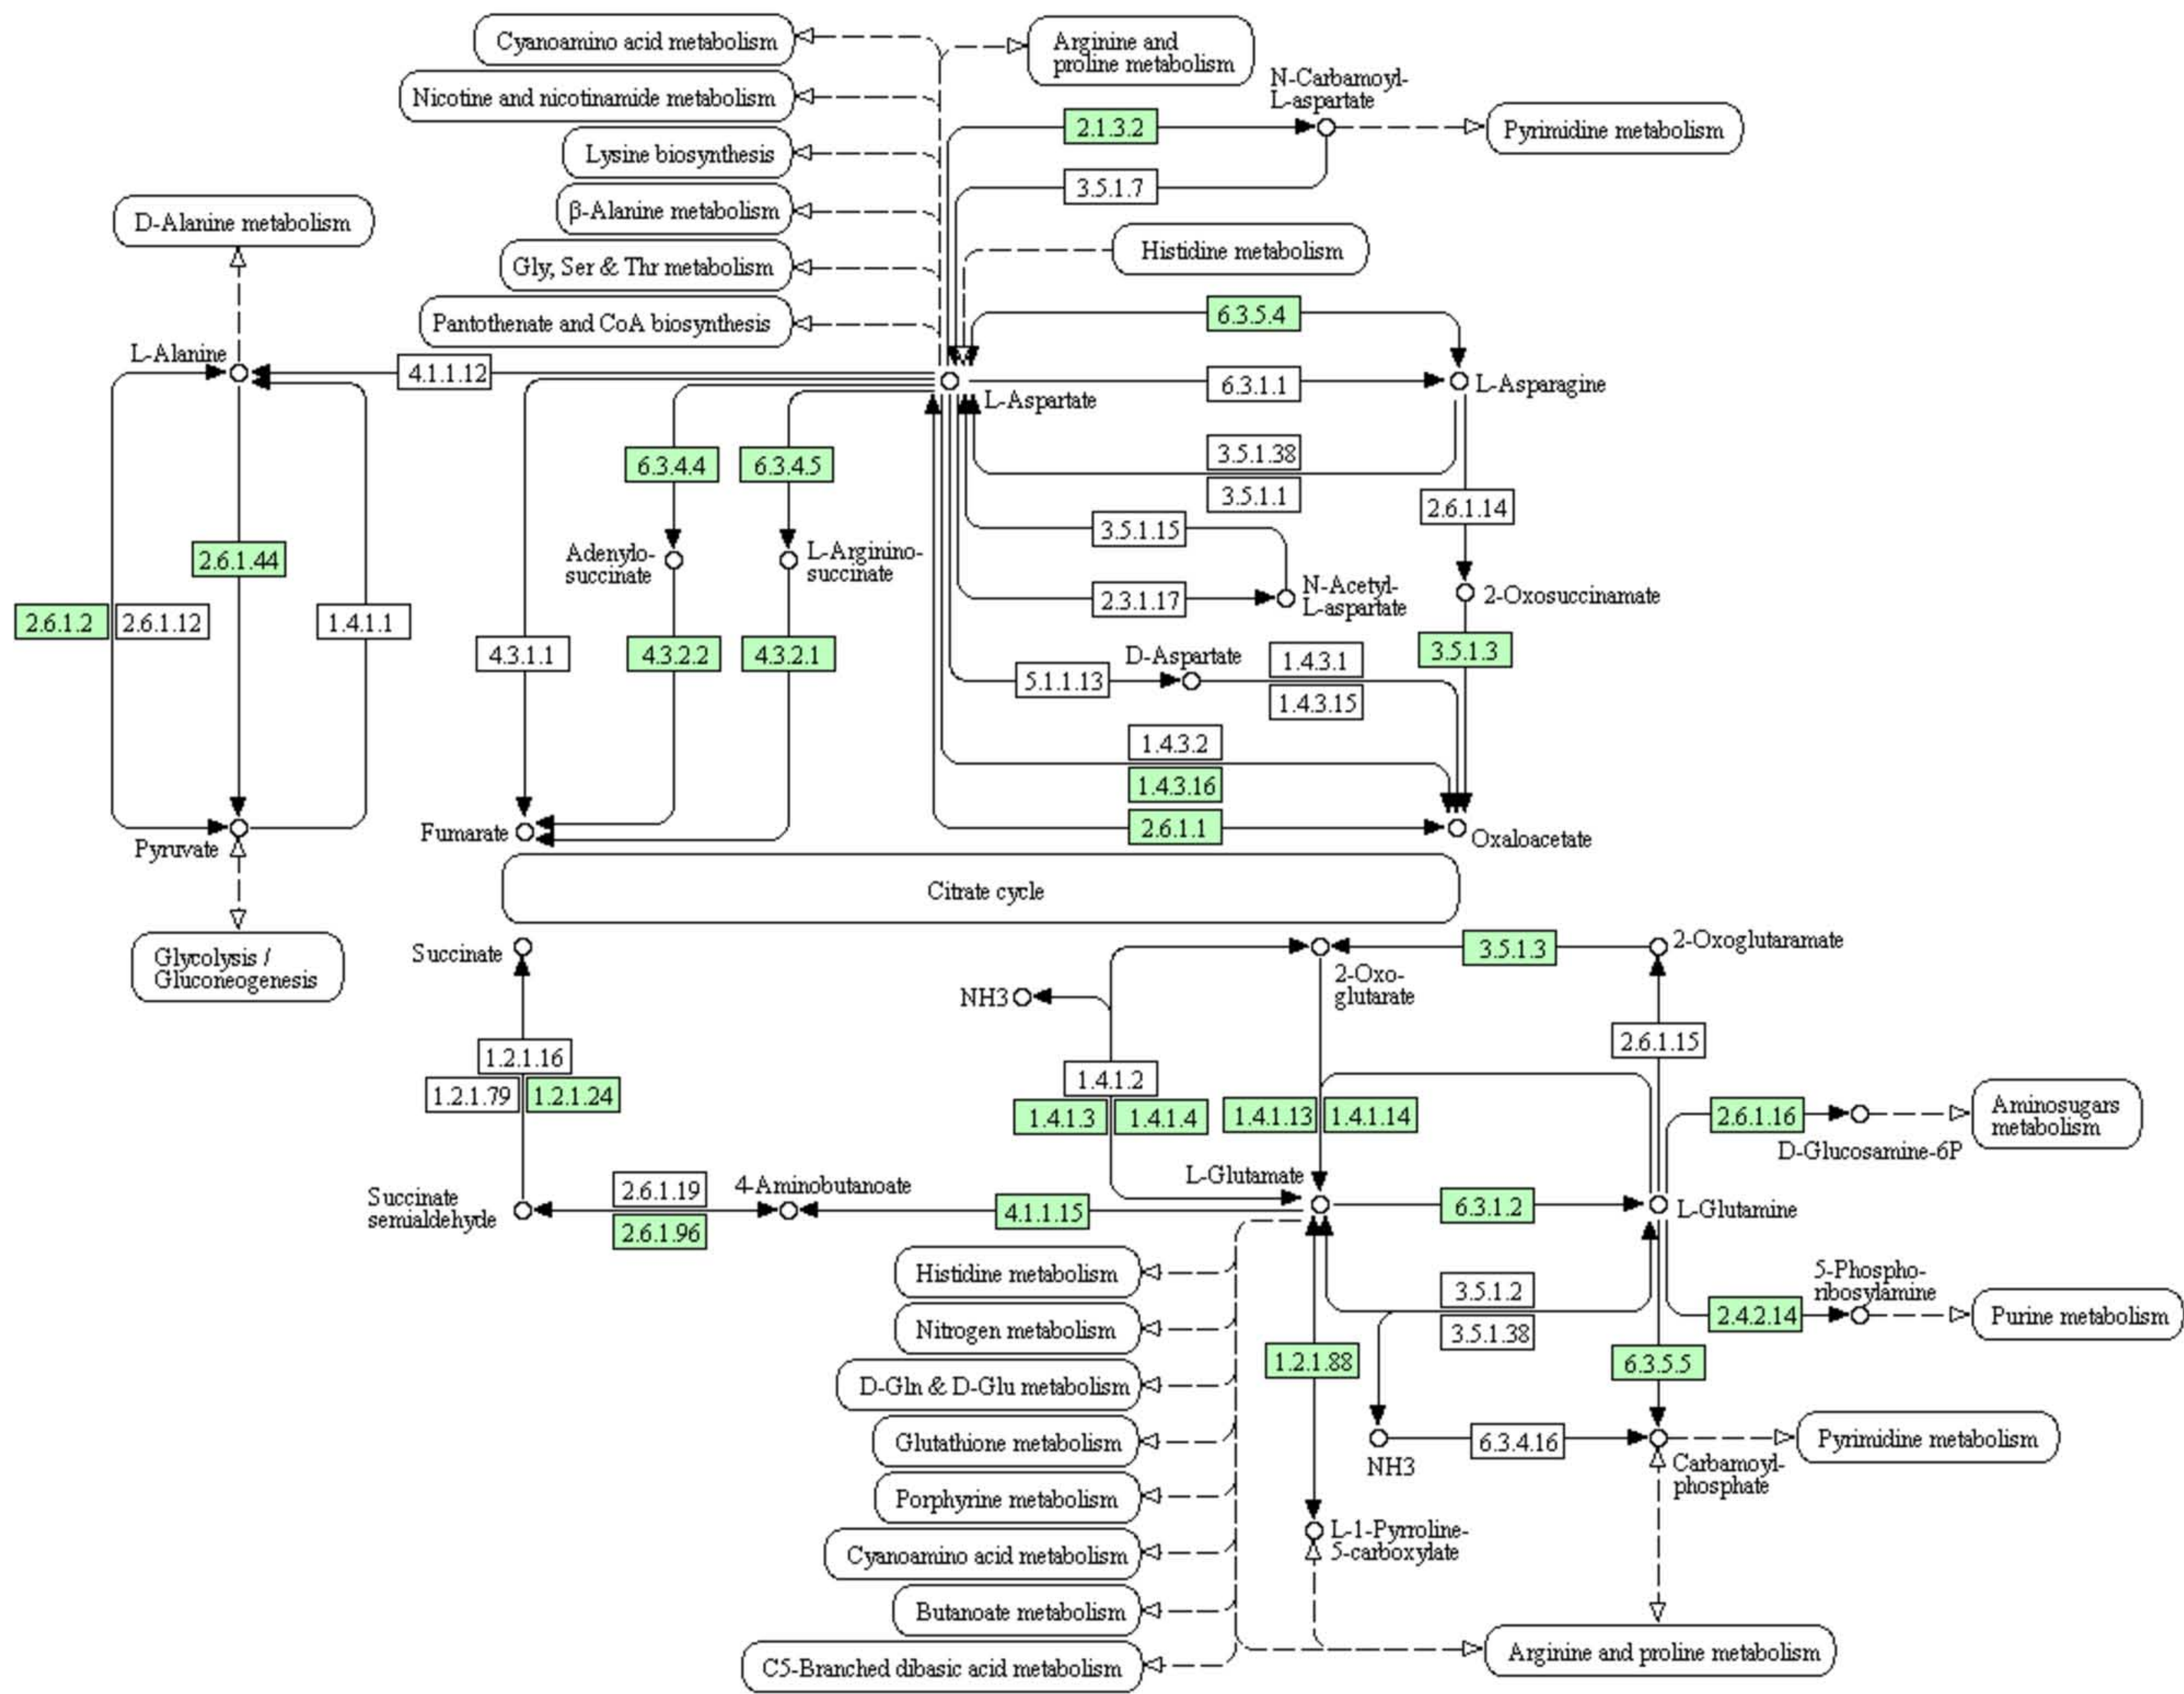



**α-LINOLENIC ACID METABOLISM**

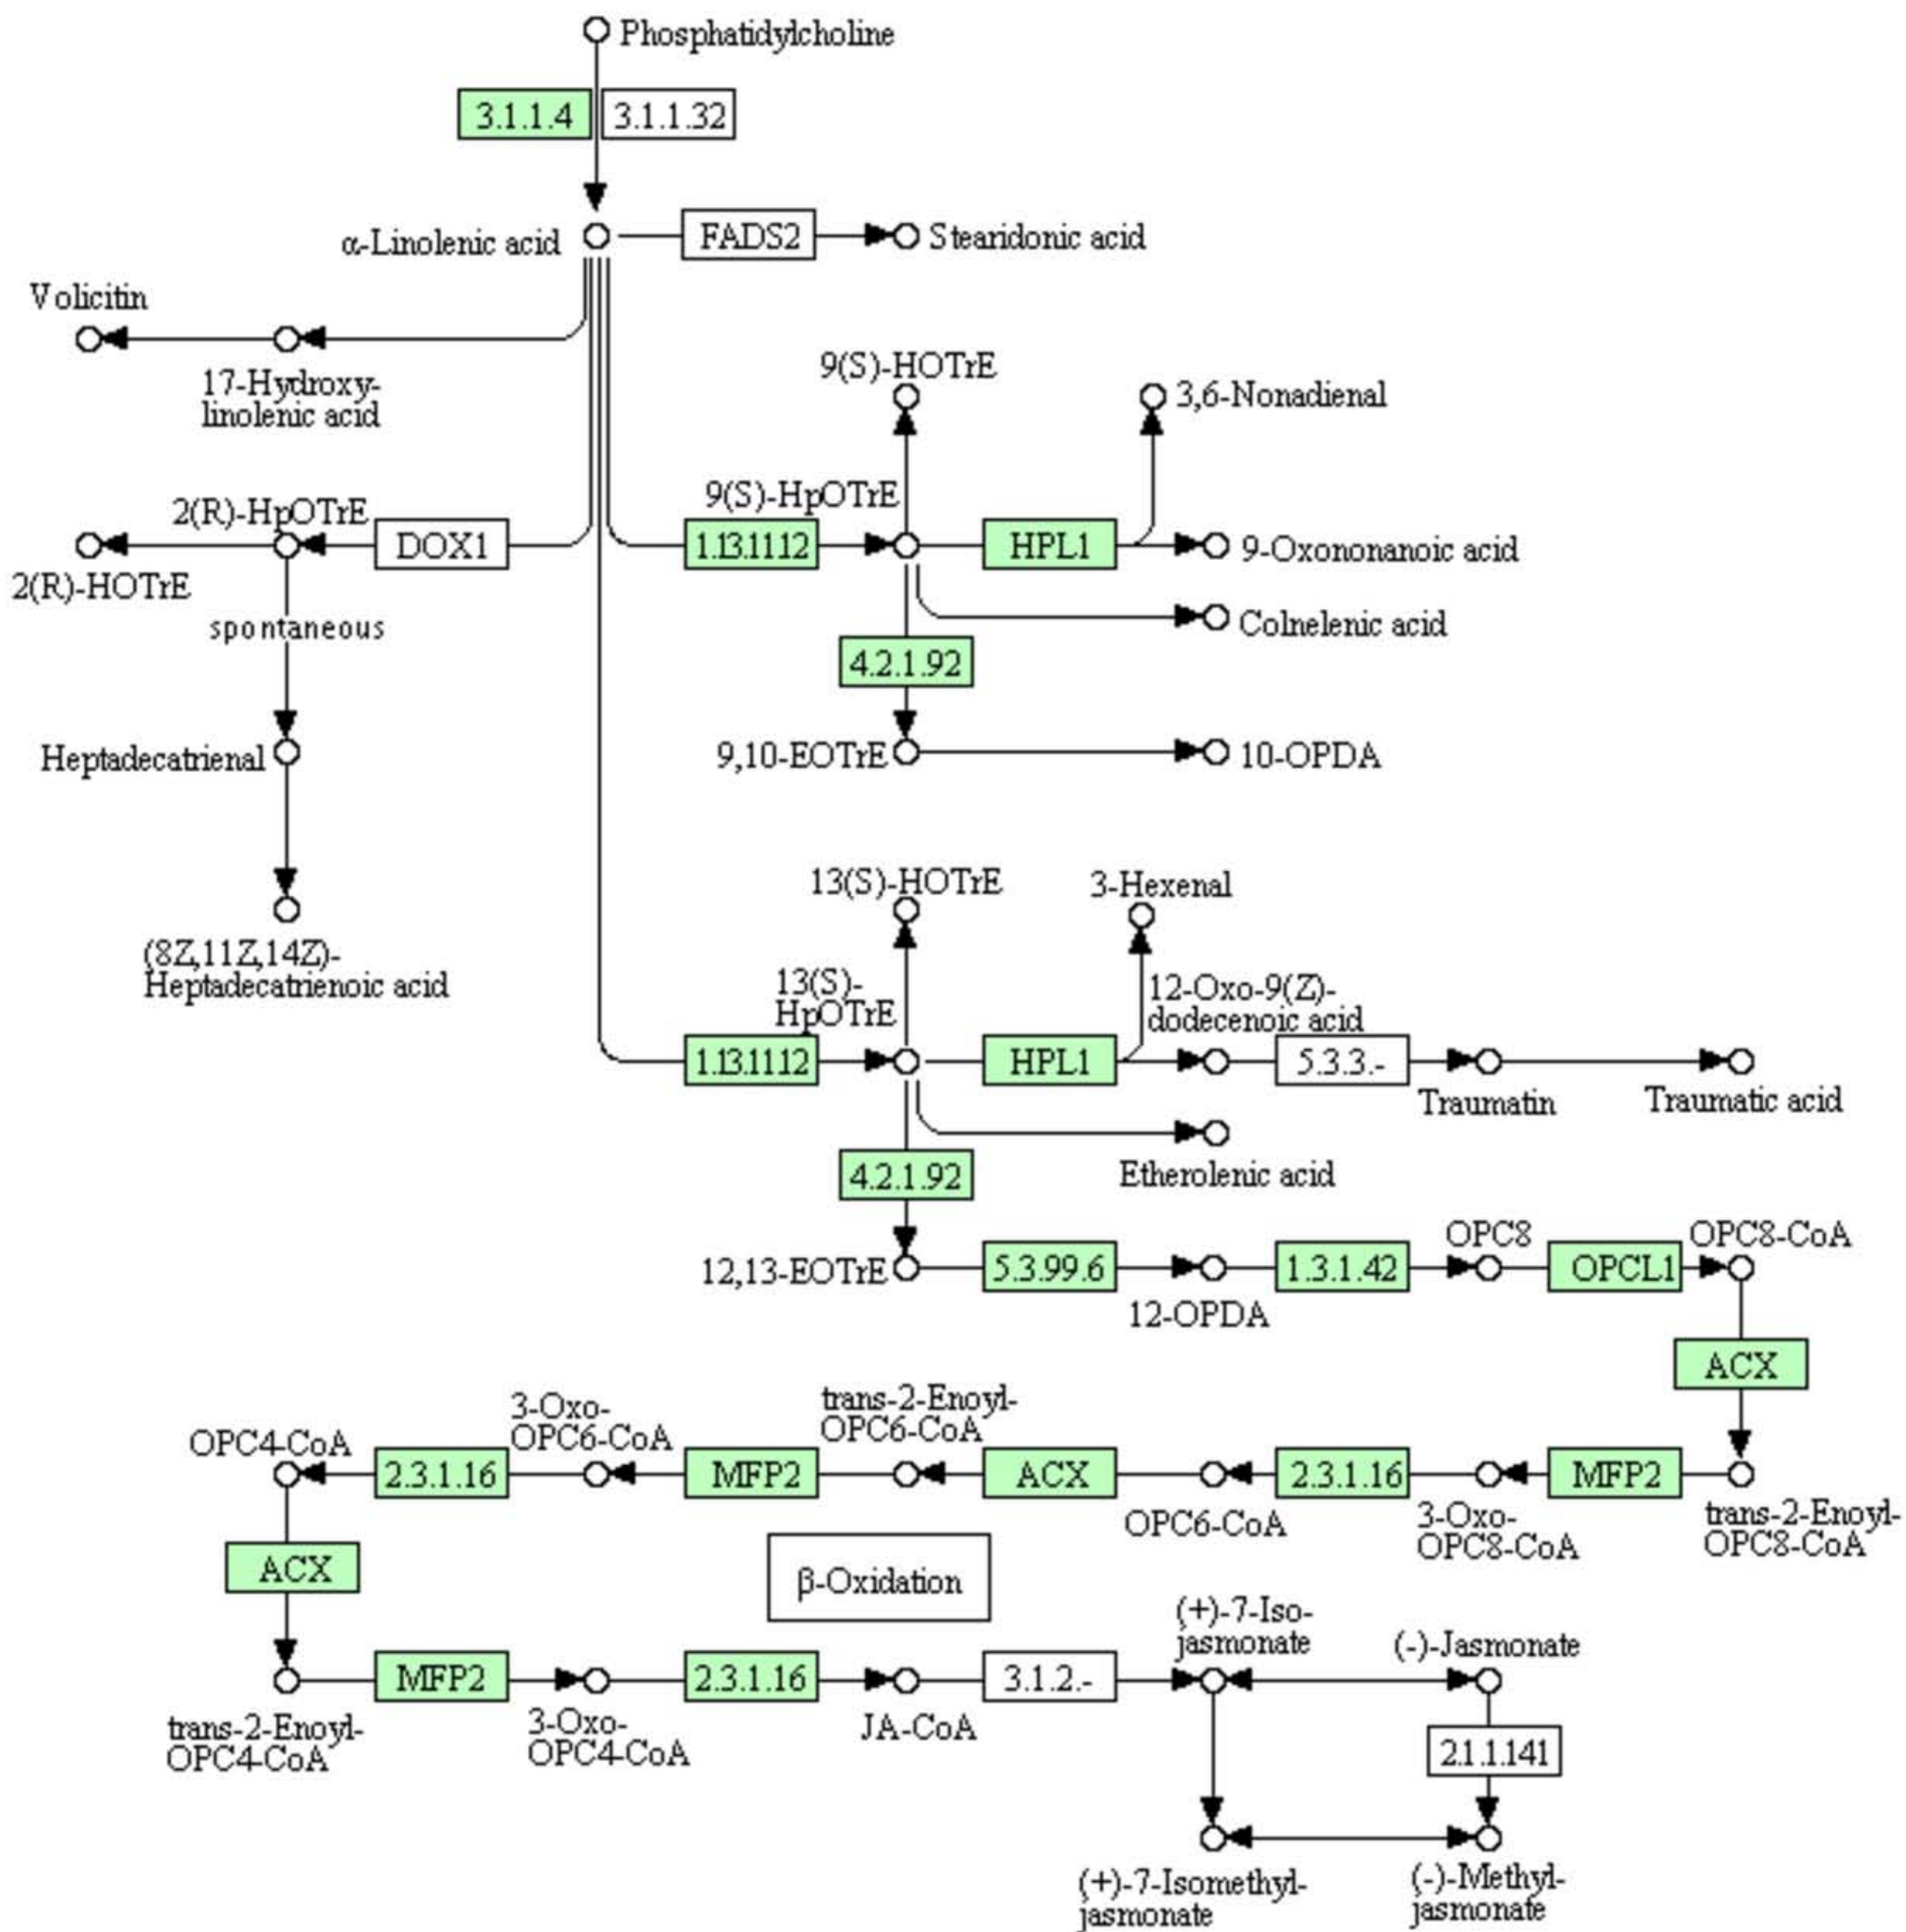



AMINO SUGAR AND NUCLEOTIDE SUGAR METABOLISM

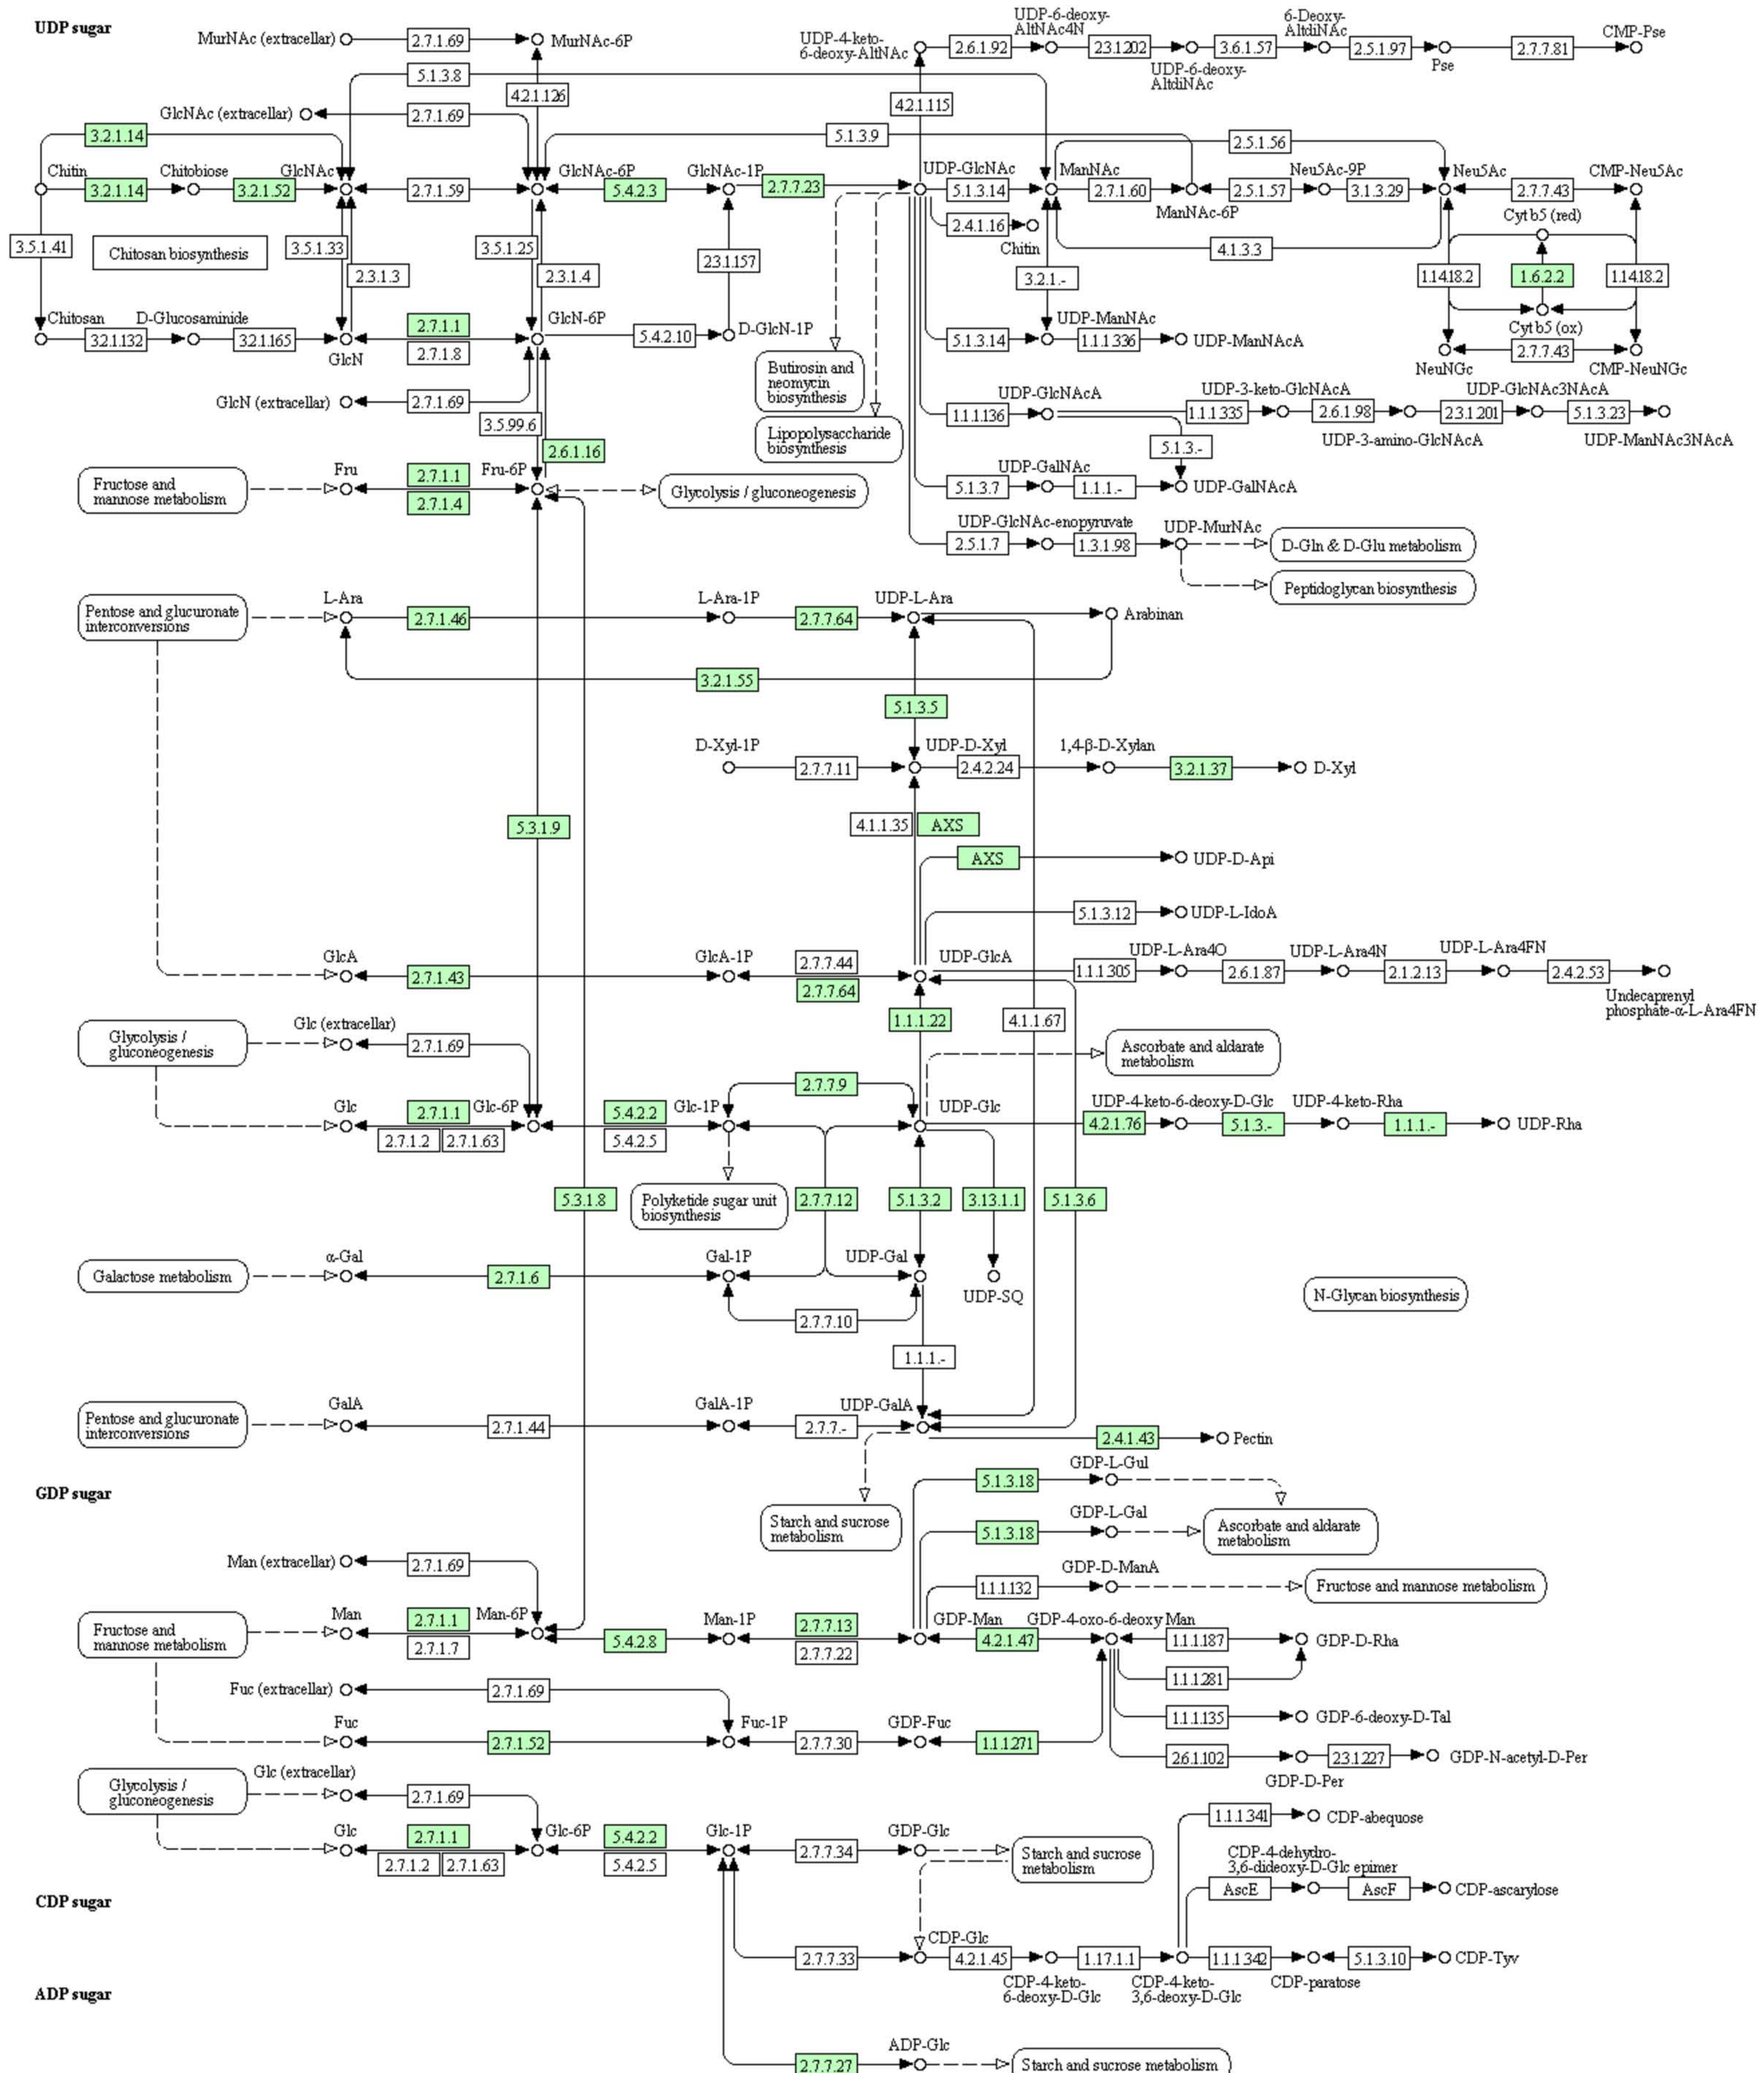



# AMINOACYL-tRNA BIOSYNTHESIS

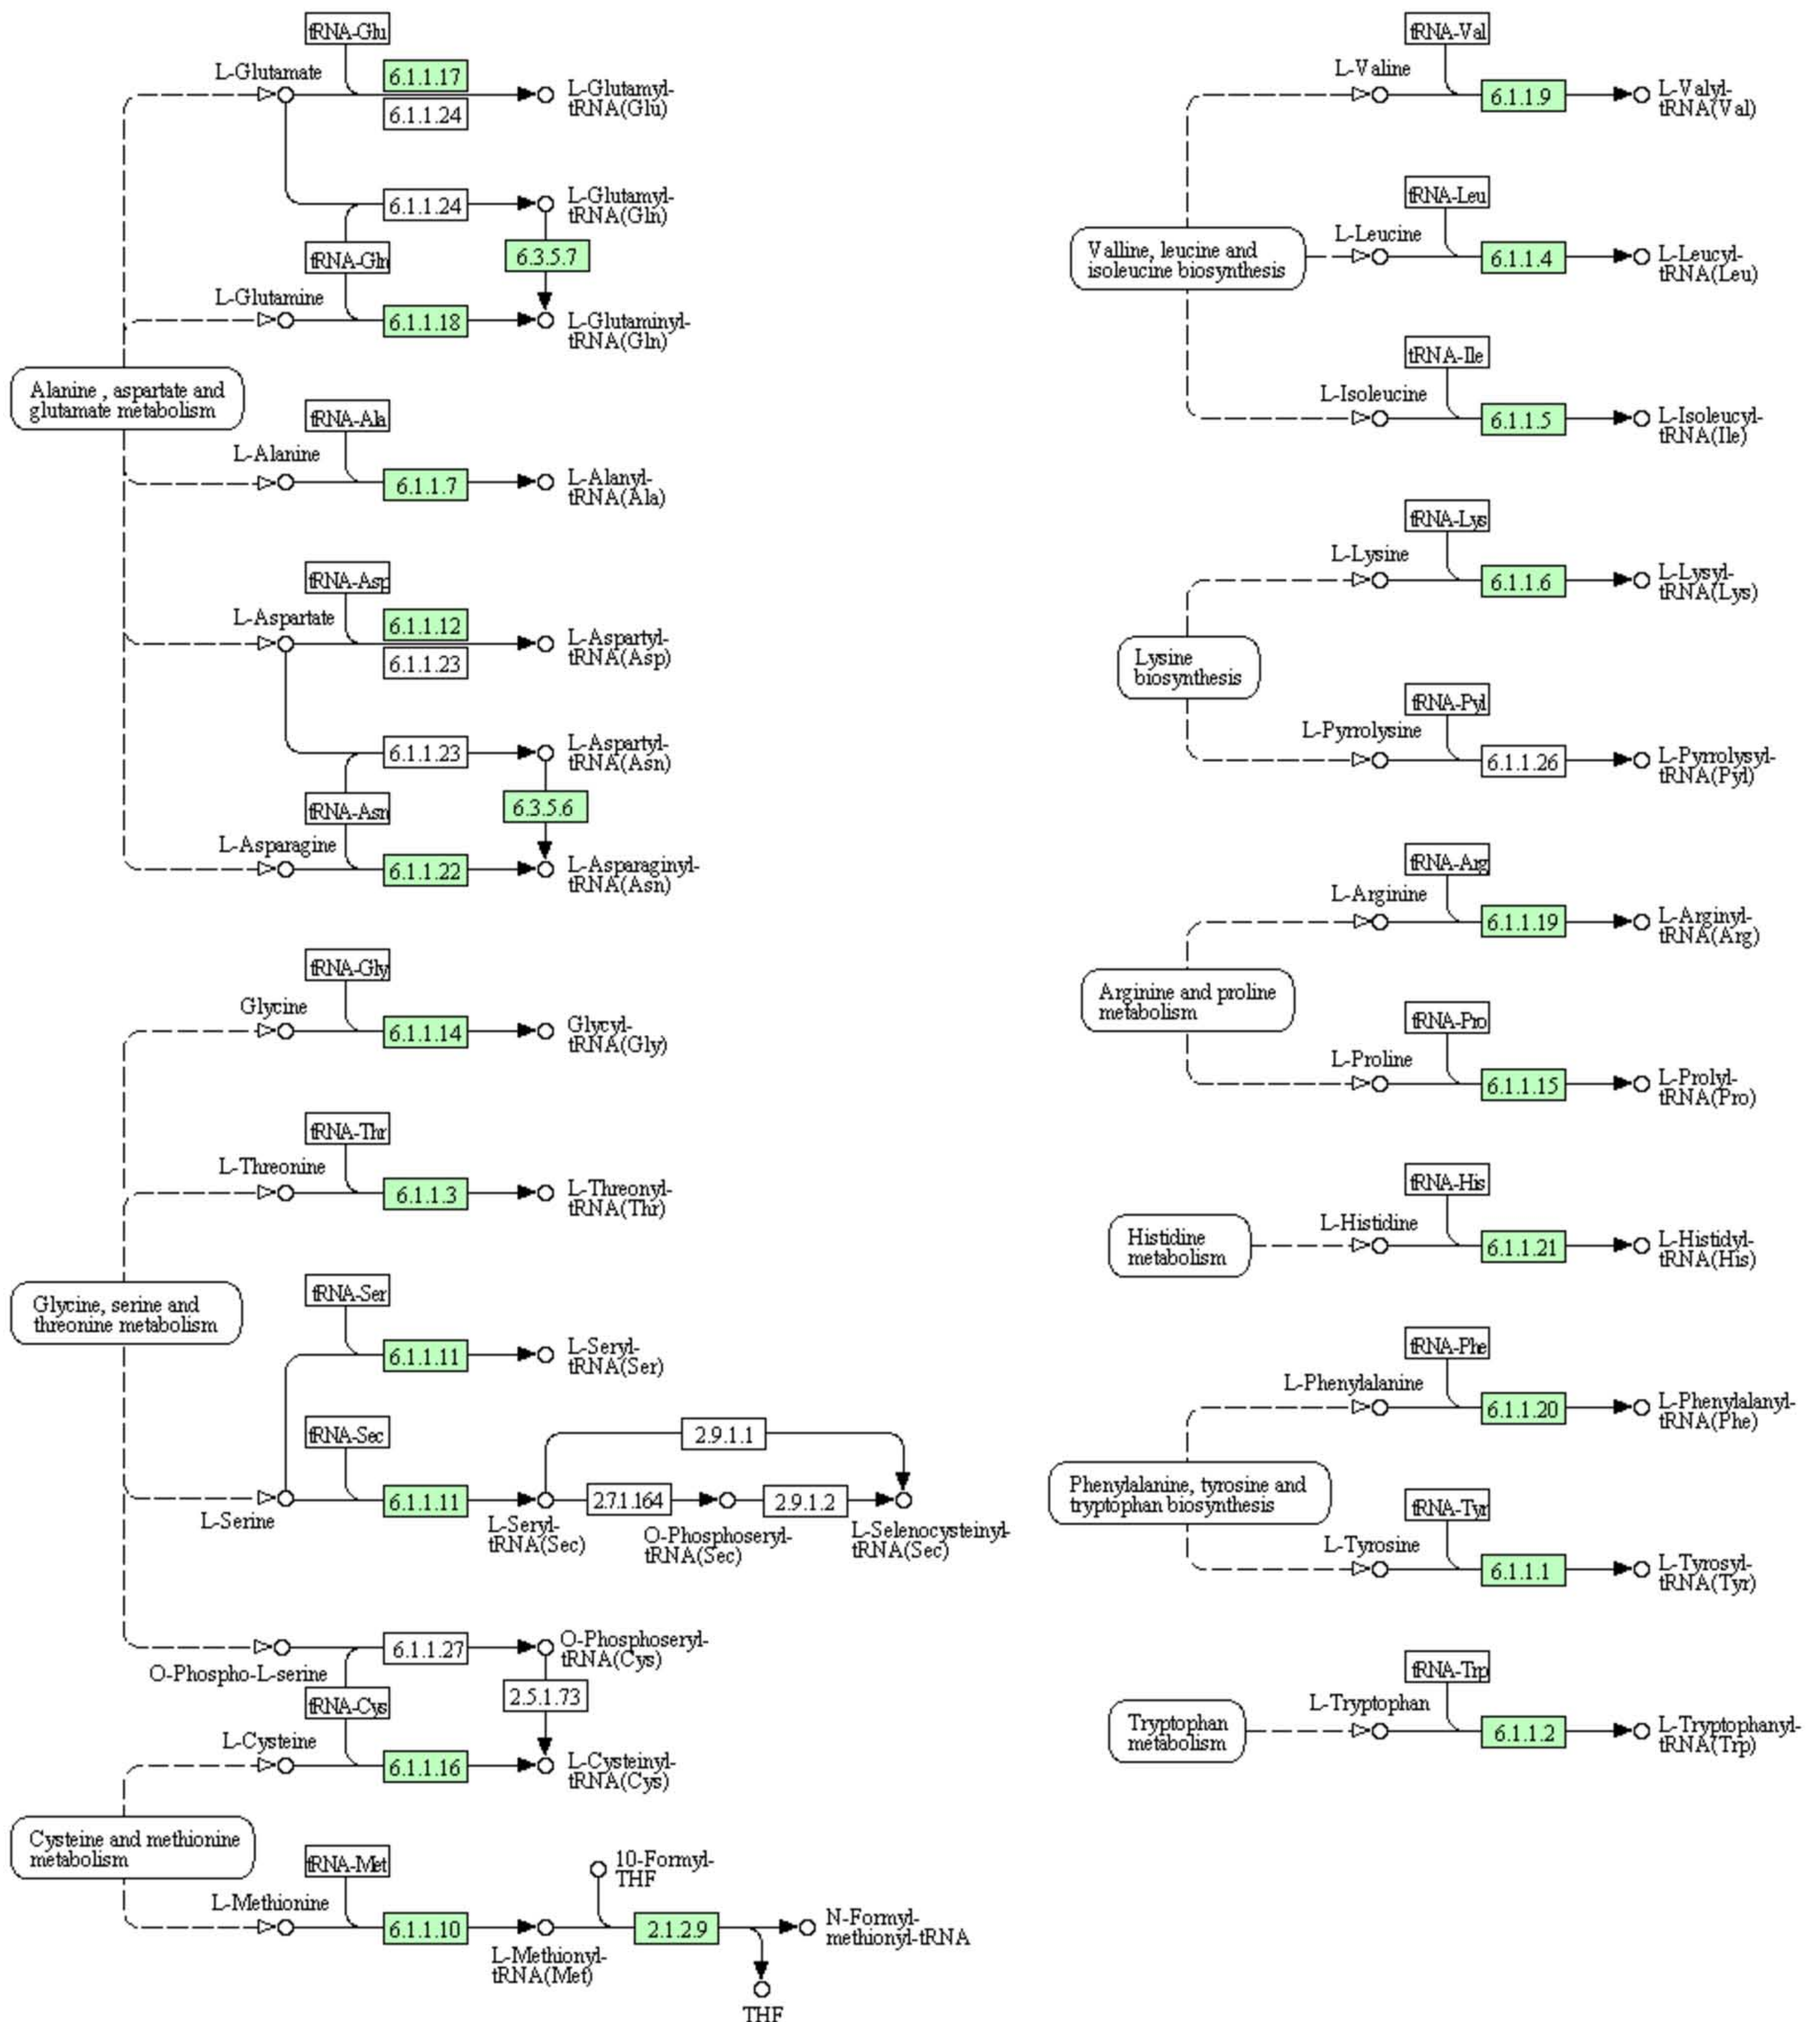



# AMINOBEZOATE DEGRADATION

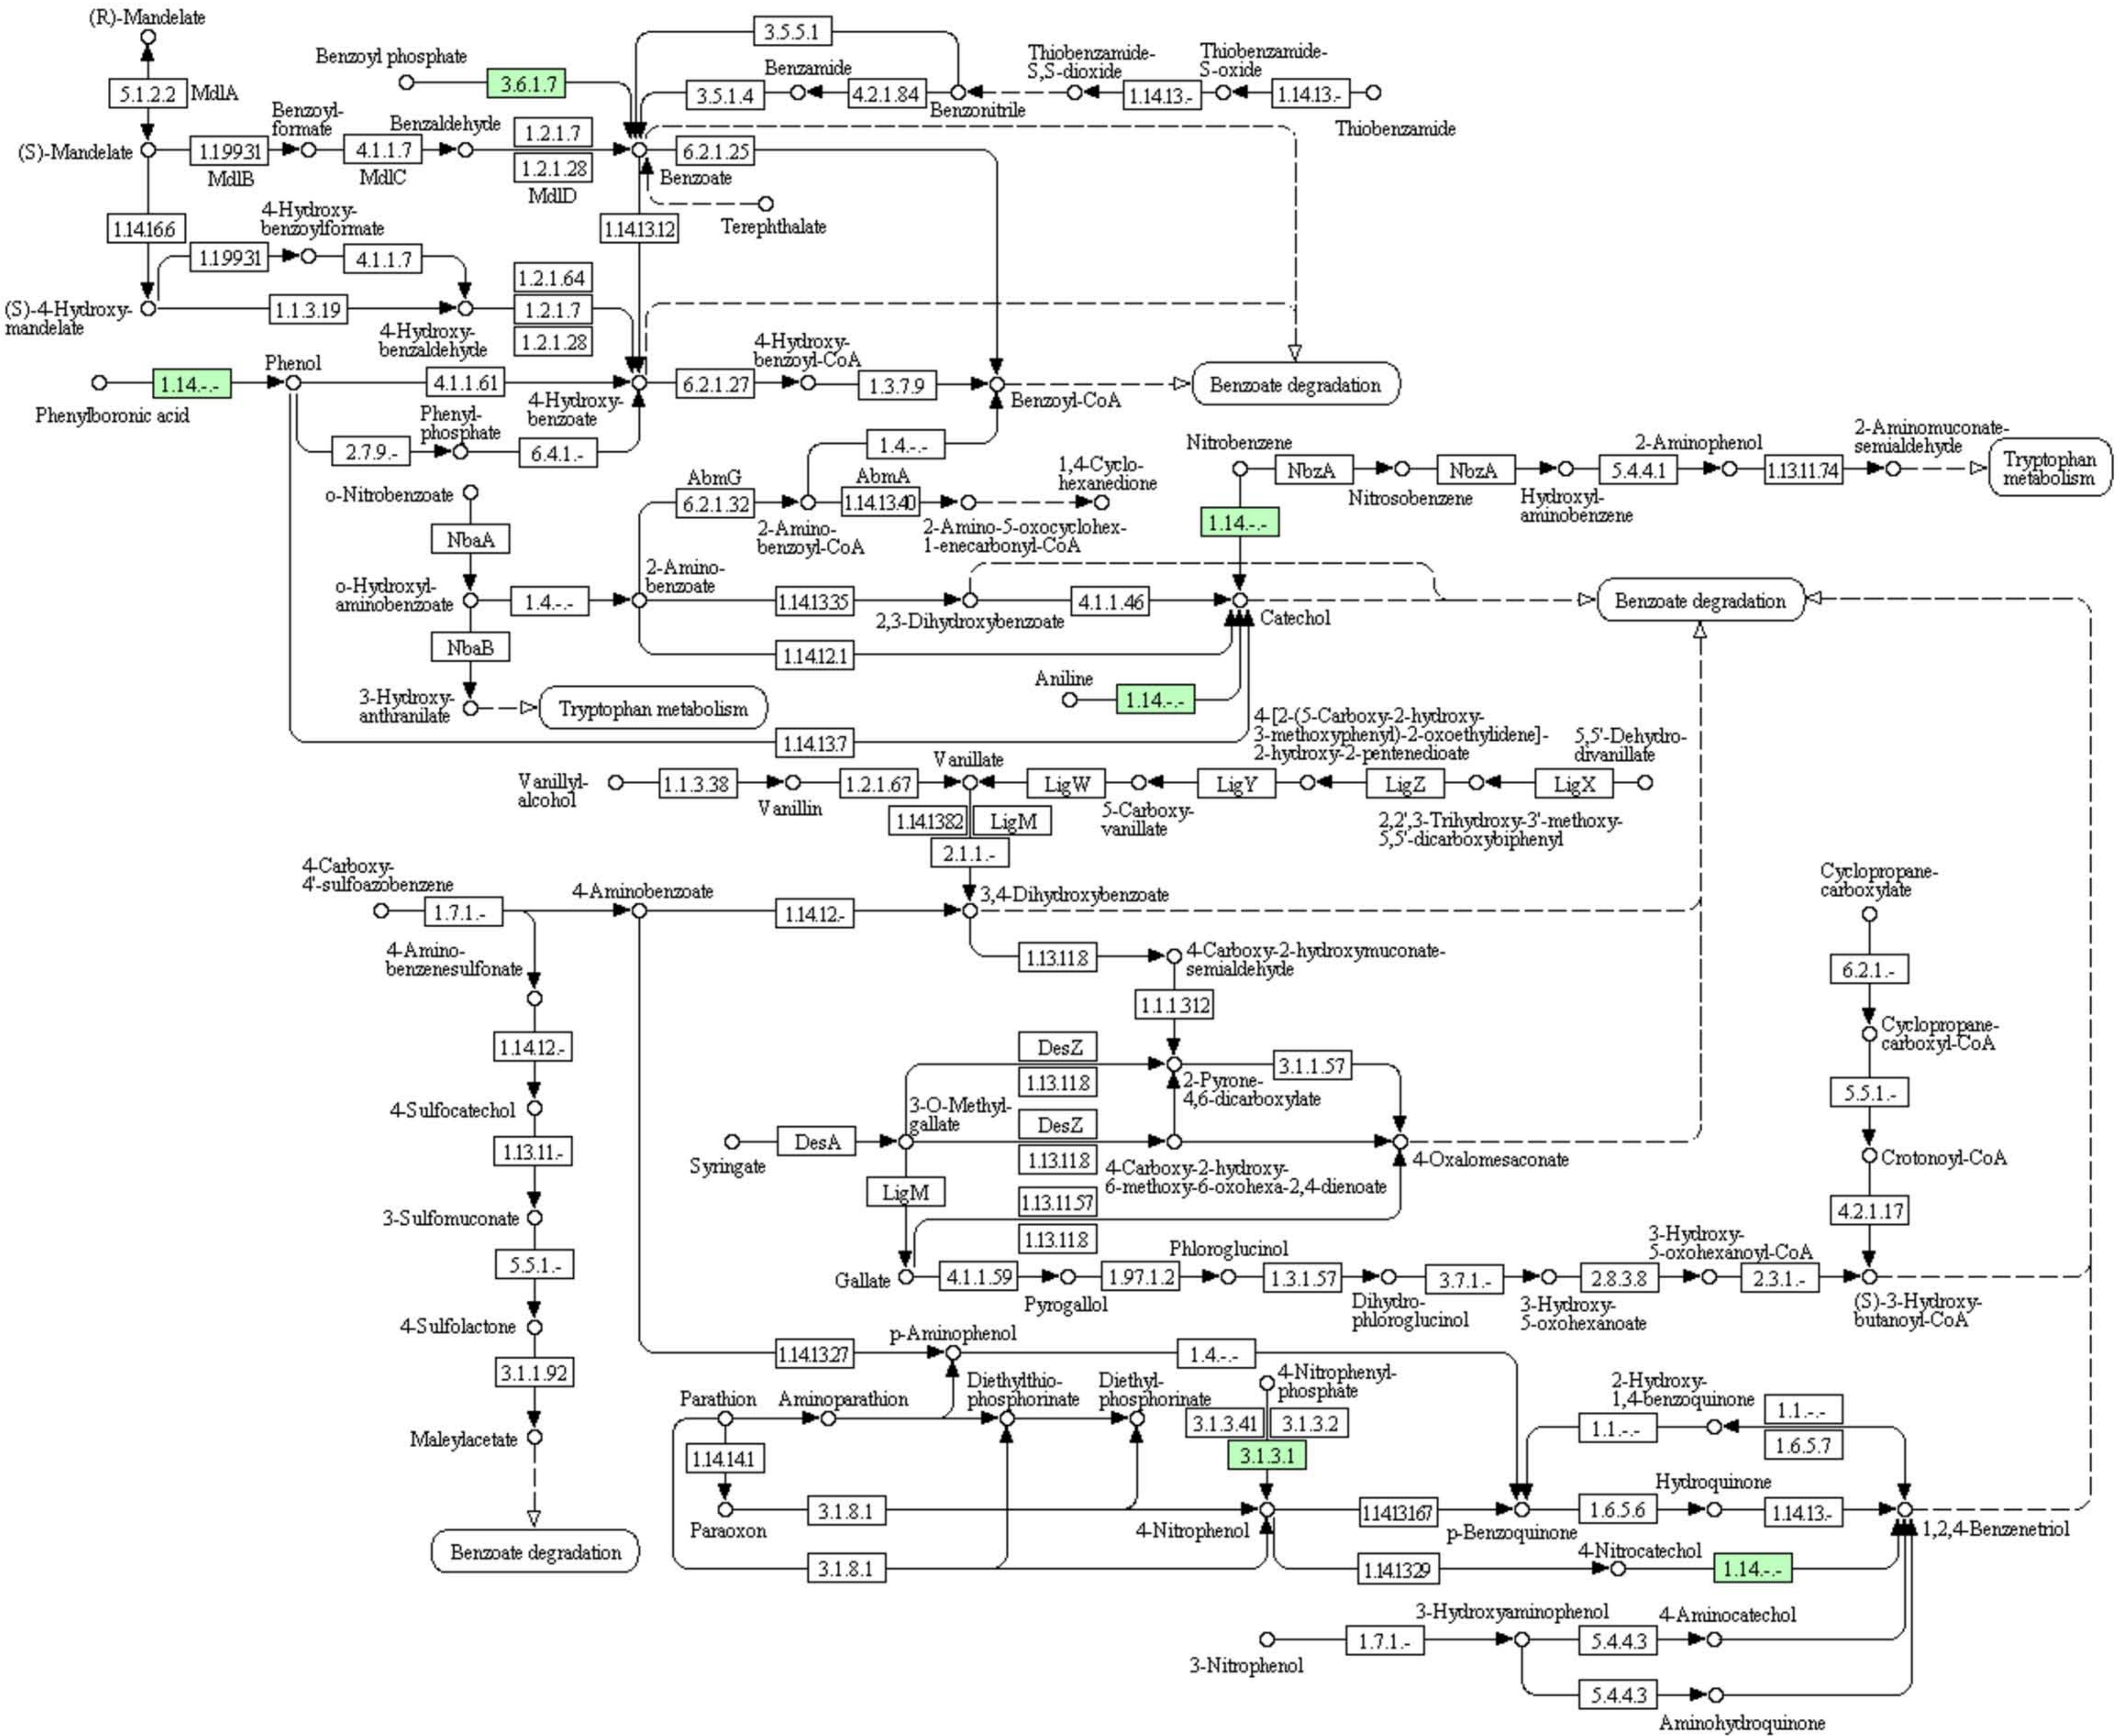



# APOPTOSIS

## Extrinsic Pathway

### Death Ligand

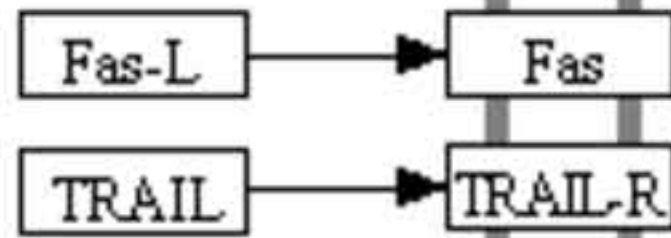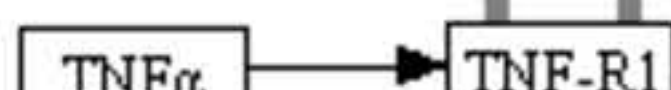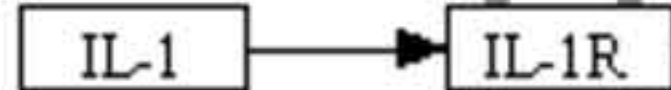

### Adaptor

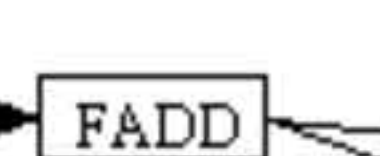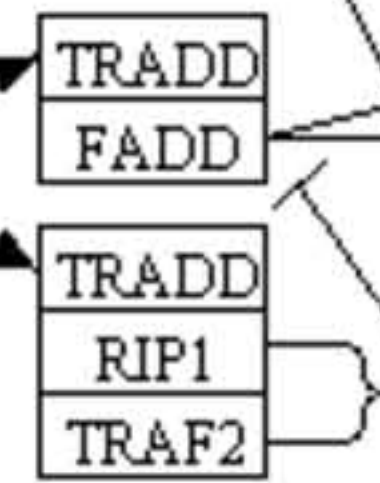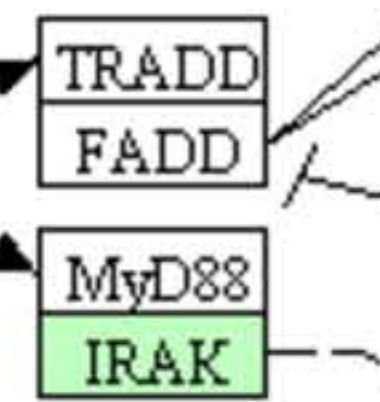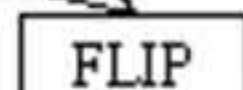

Cytokine-cytokine receptor interaction

### Survival Factors

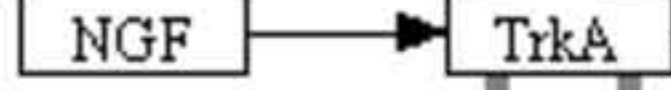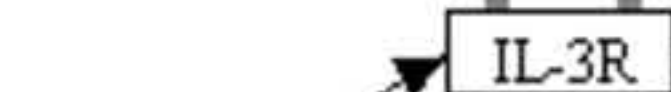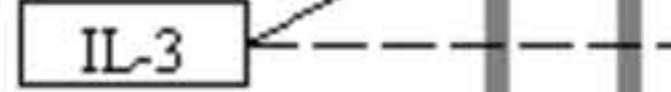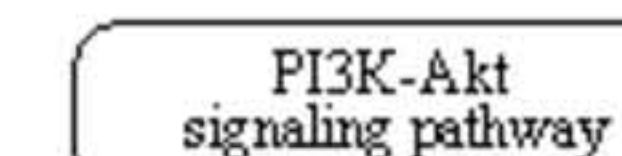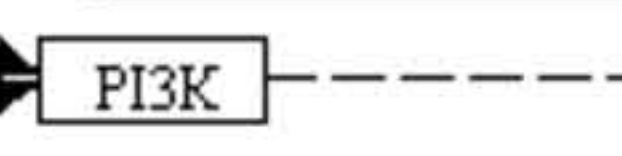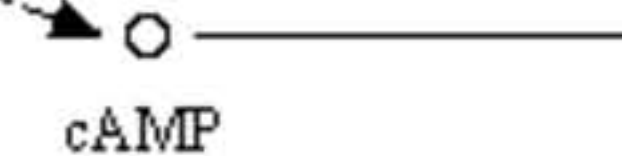

### Ca<sup>2+</sup>-induced Cell Death Pathways

[Ca<sup>2+</sup>]<sub>i</sub> Rises  
ER Stress

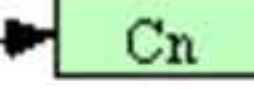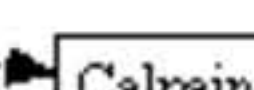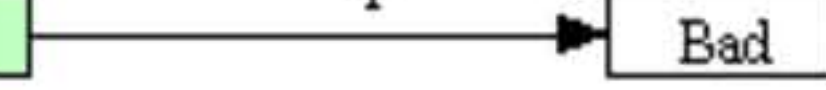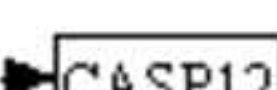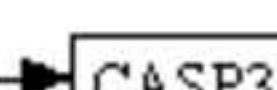

NF-κB signaling pathway

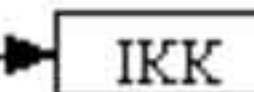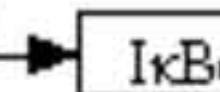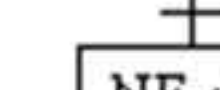

DNA Survival Genes

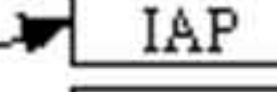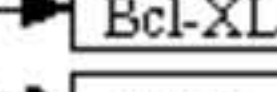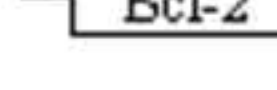

Death Genes

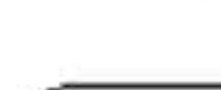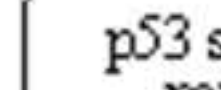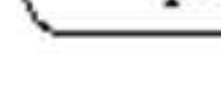

p53 signaling pathway

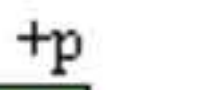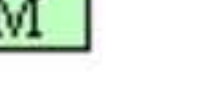

DNA Damage

Cell cycle

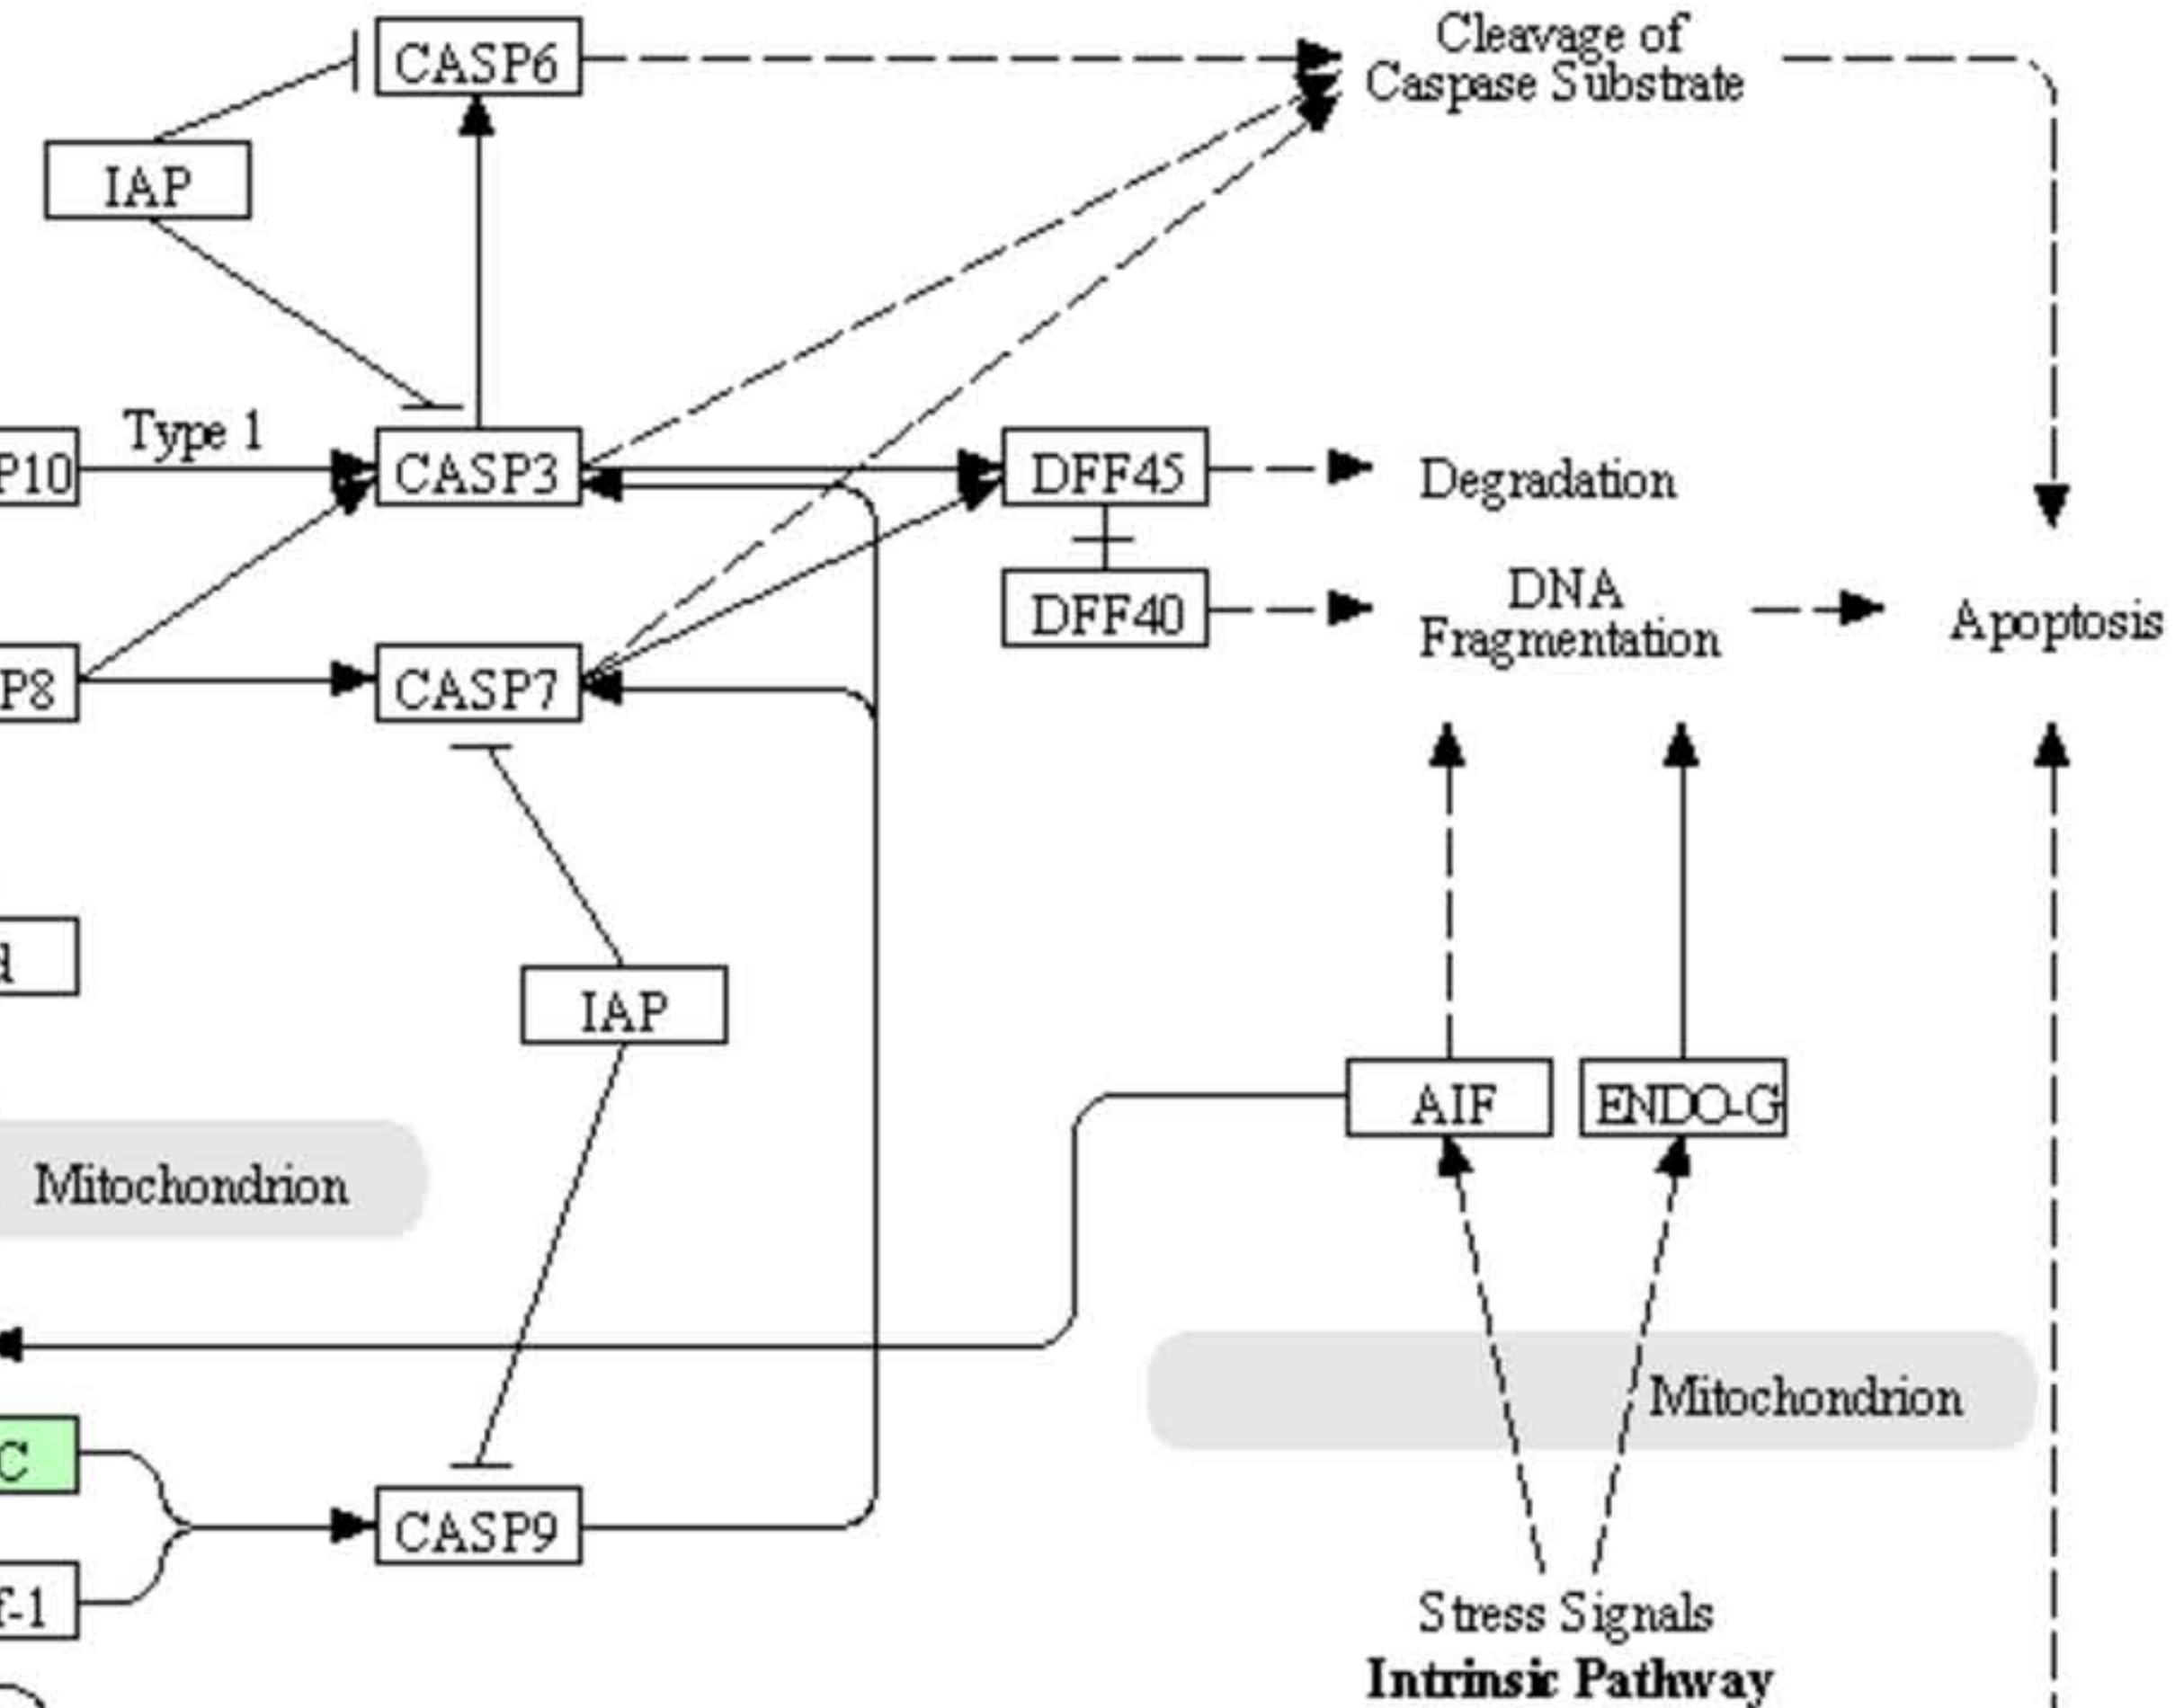



ARACHIDONIC ACID METABOLISM

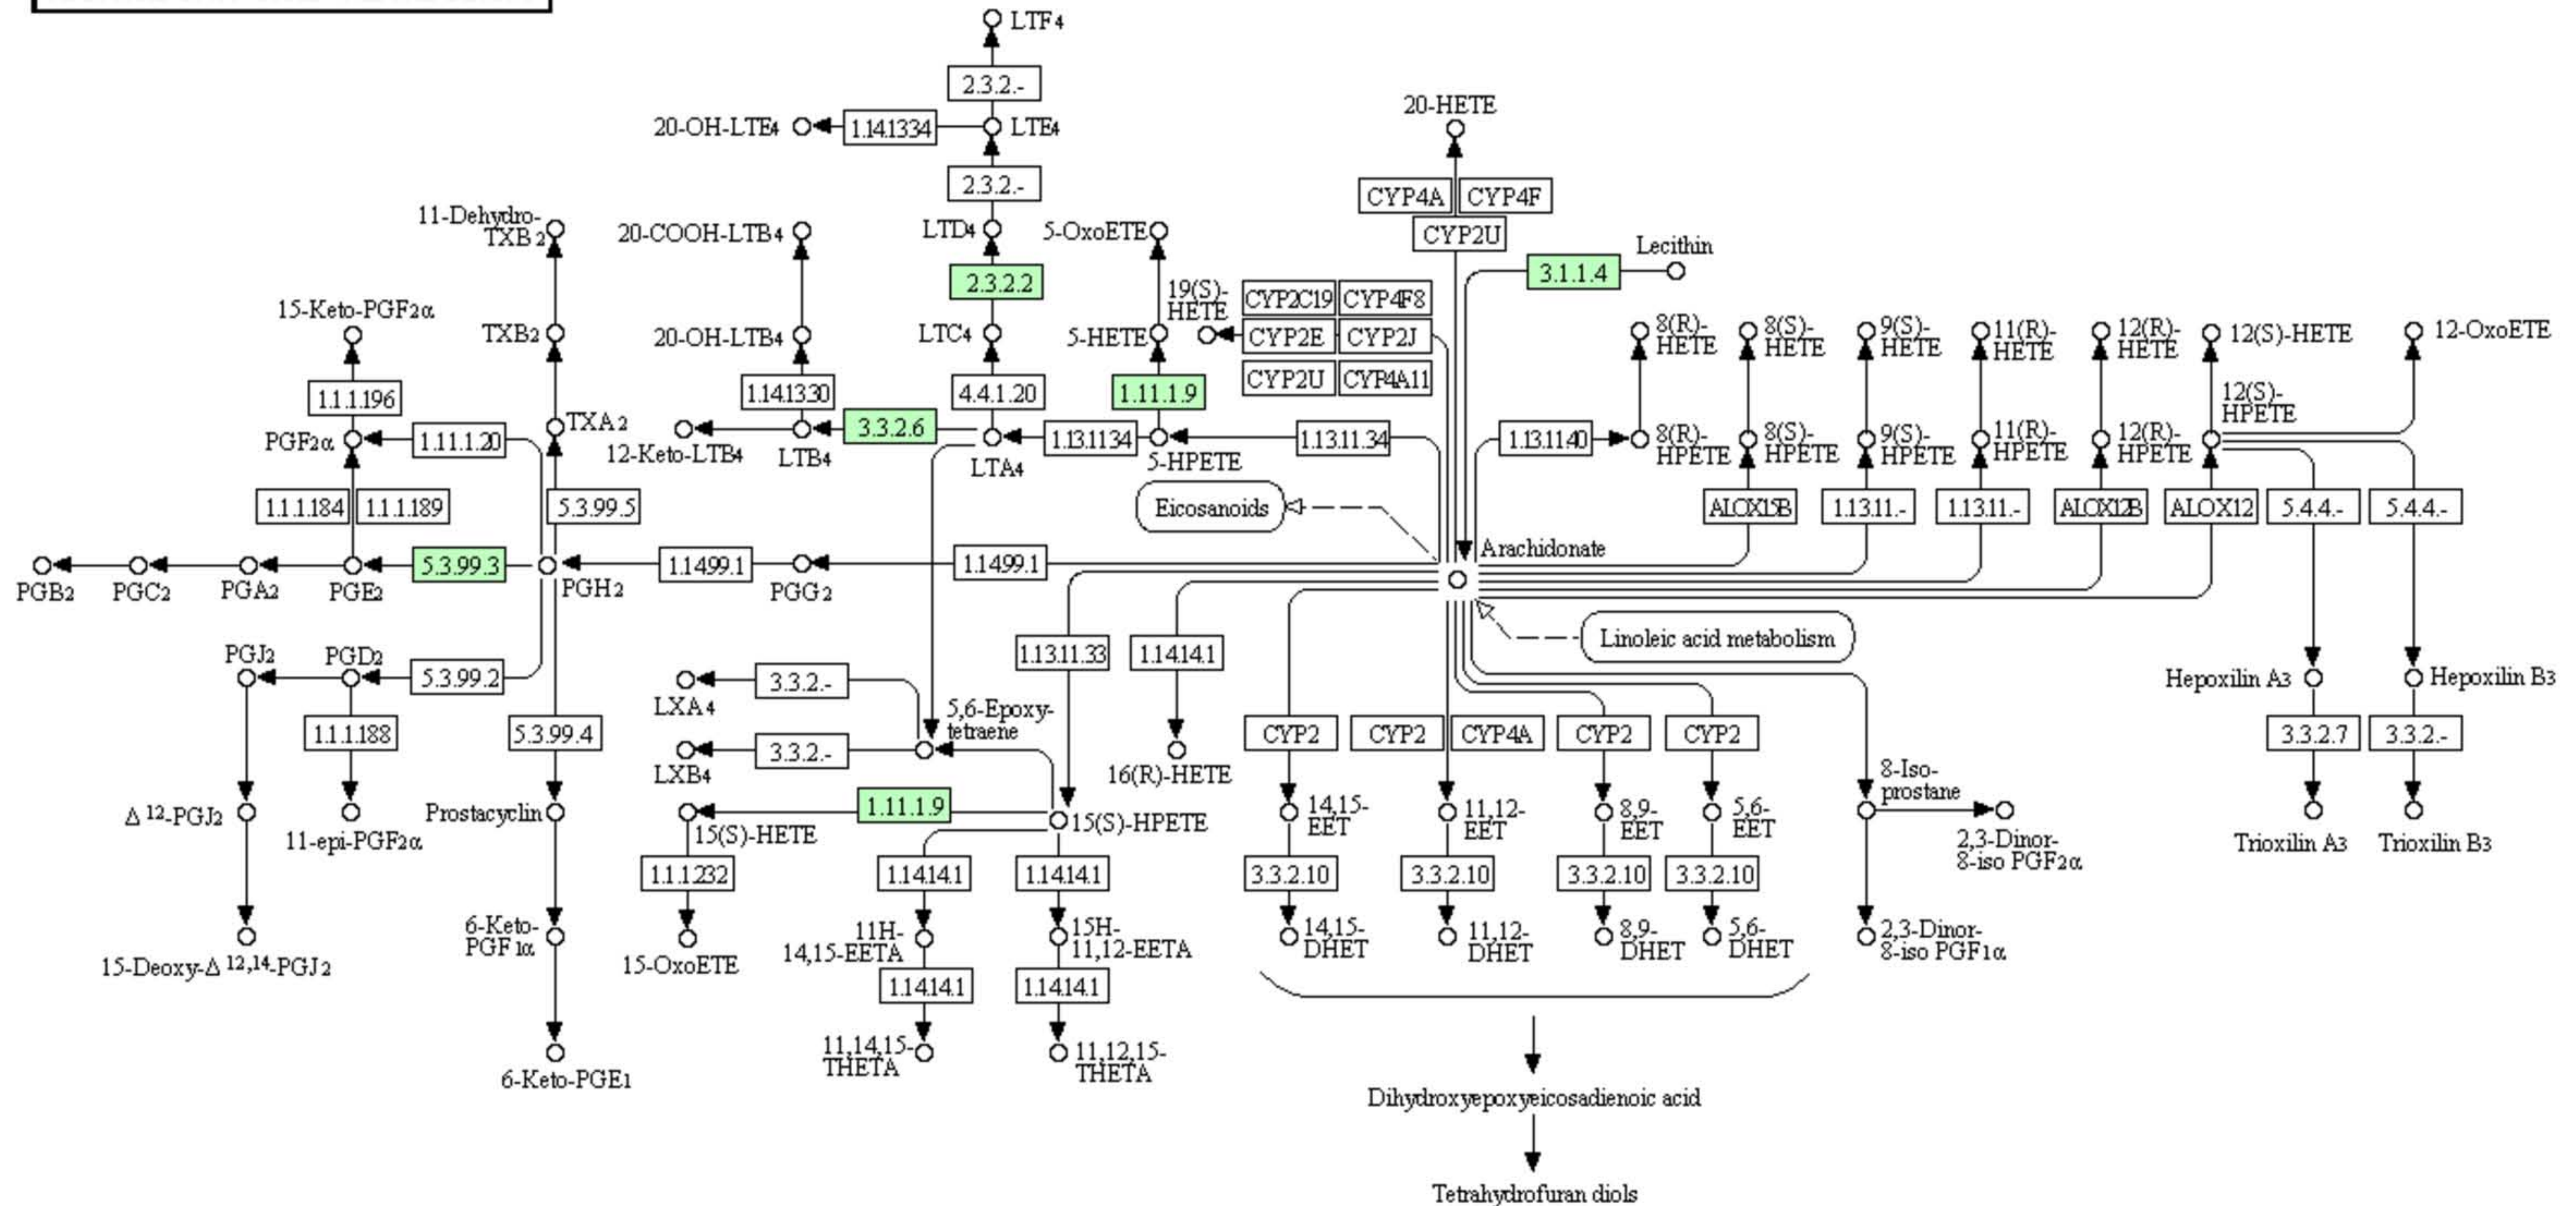



ARGININE AND PROLINE METABOLISM

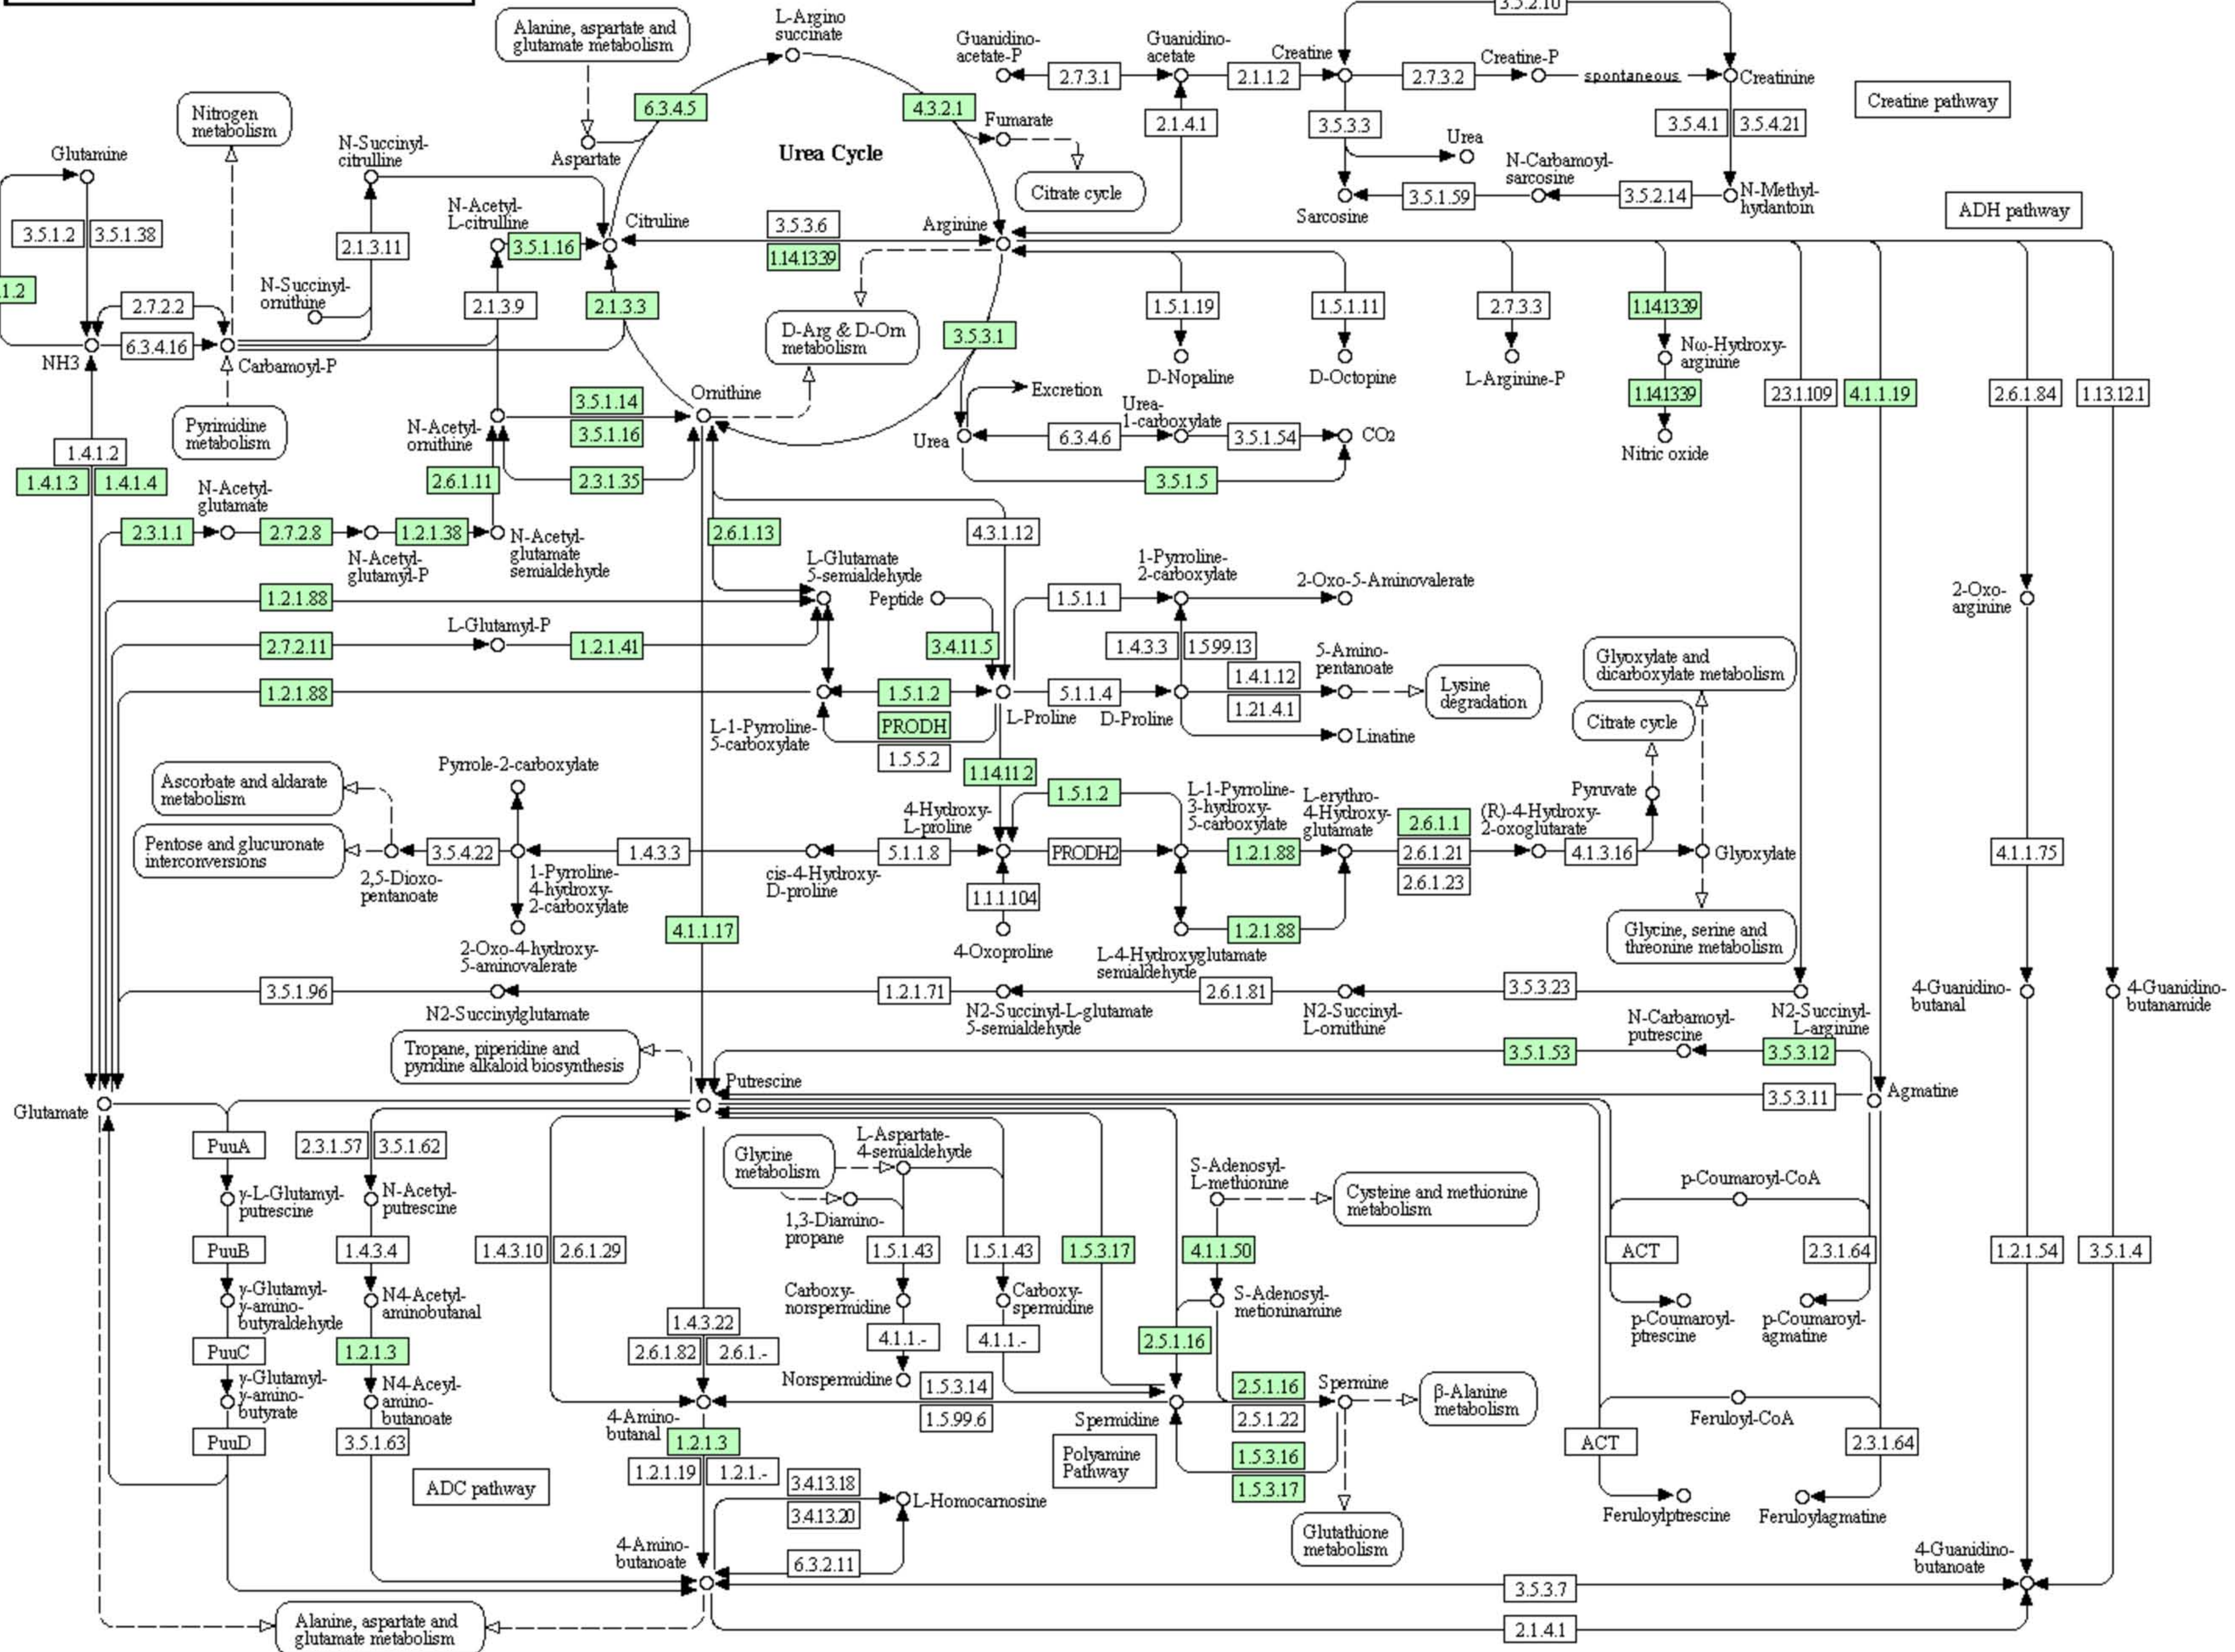











**BASAL TRANSCRIPTION FACTORS (EUKARYOTES)**

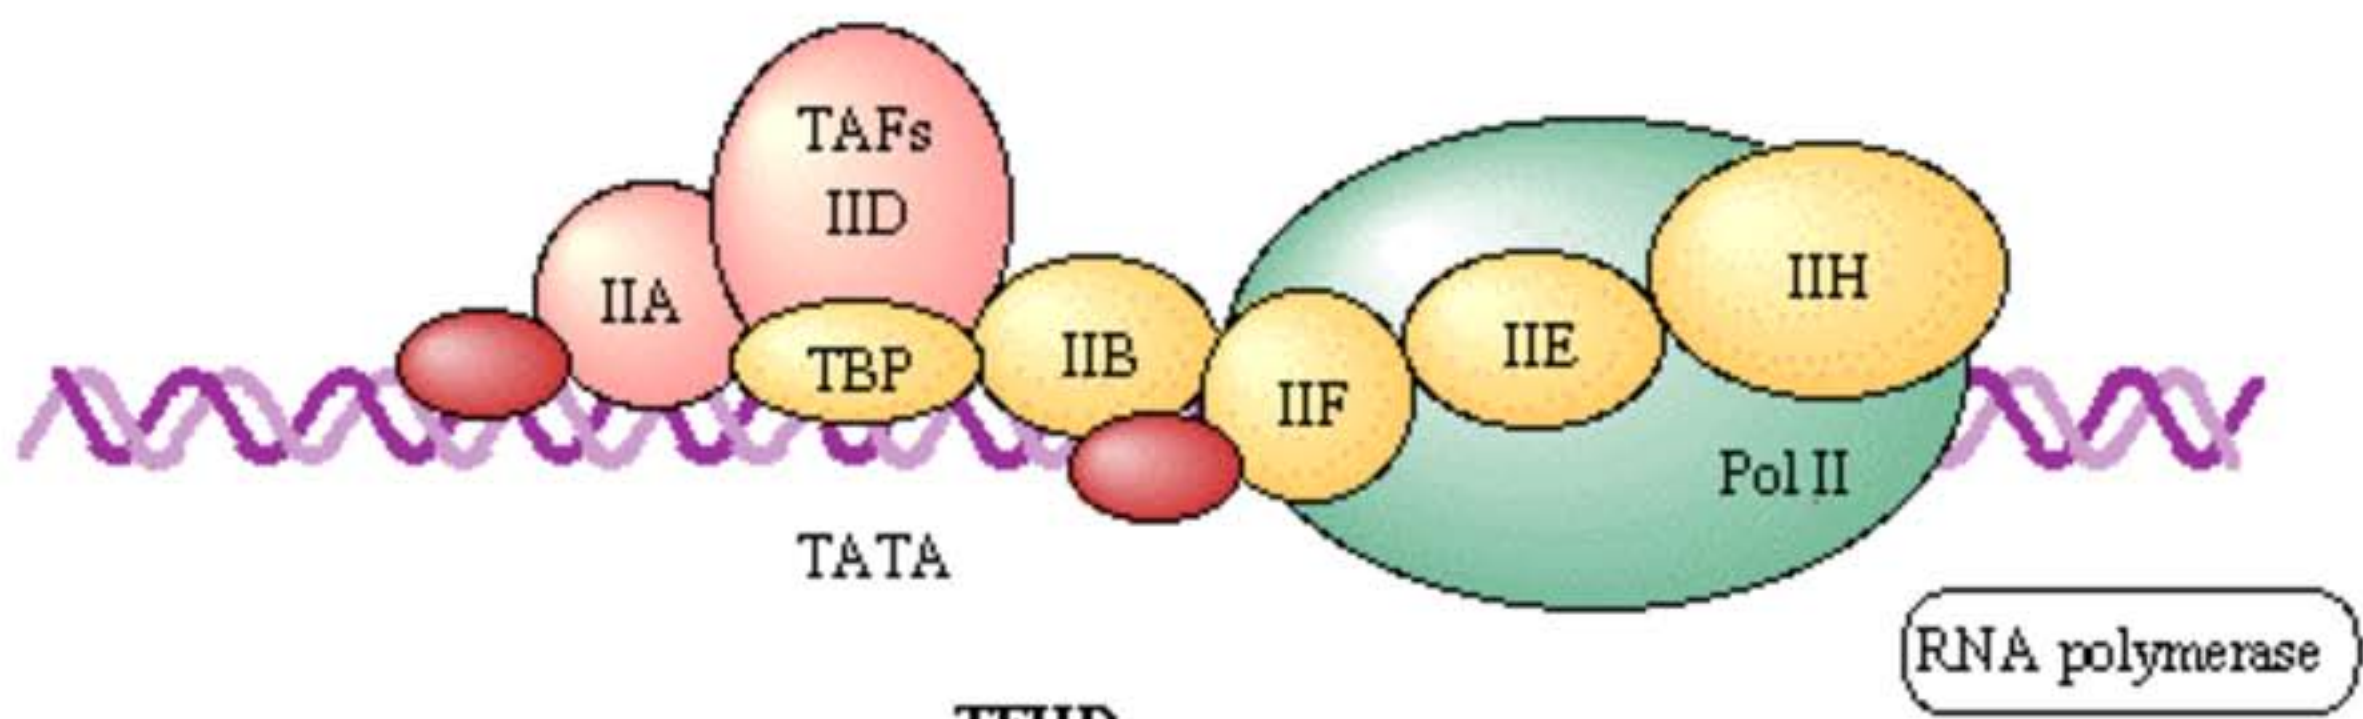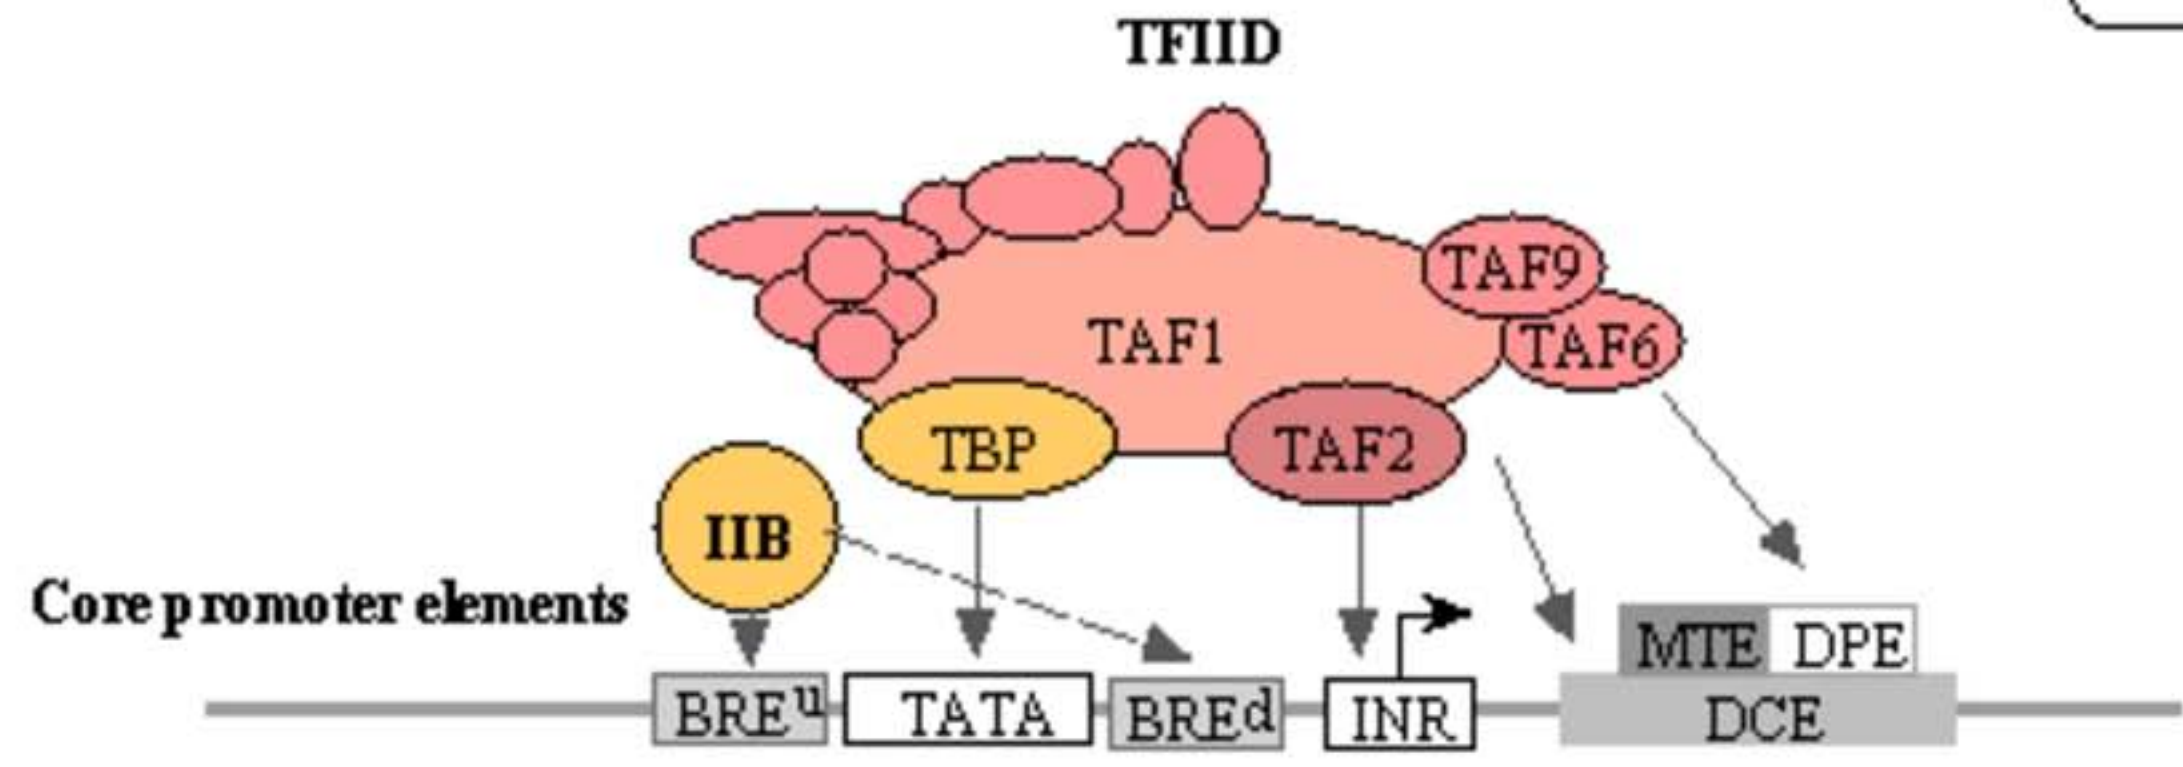

**General transcription factors for RNA polymerase II**

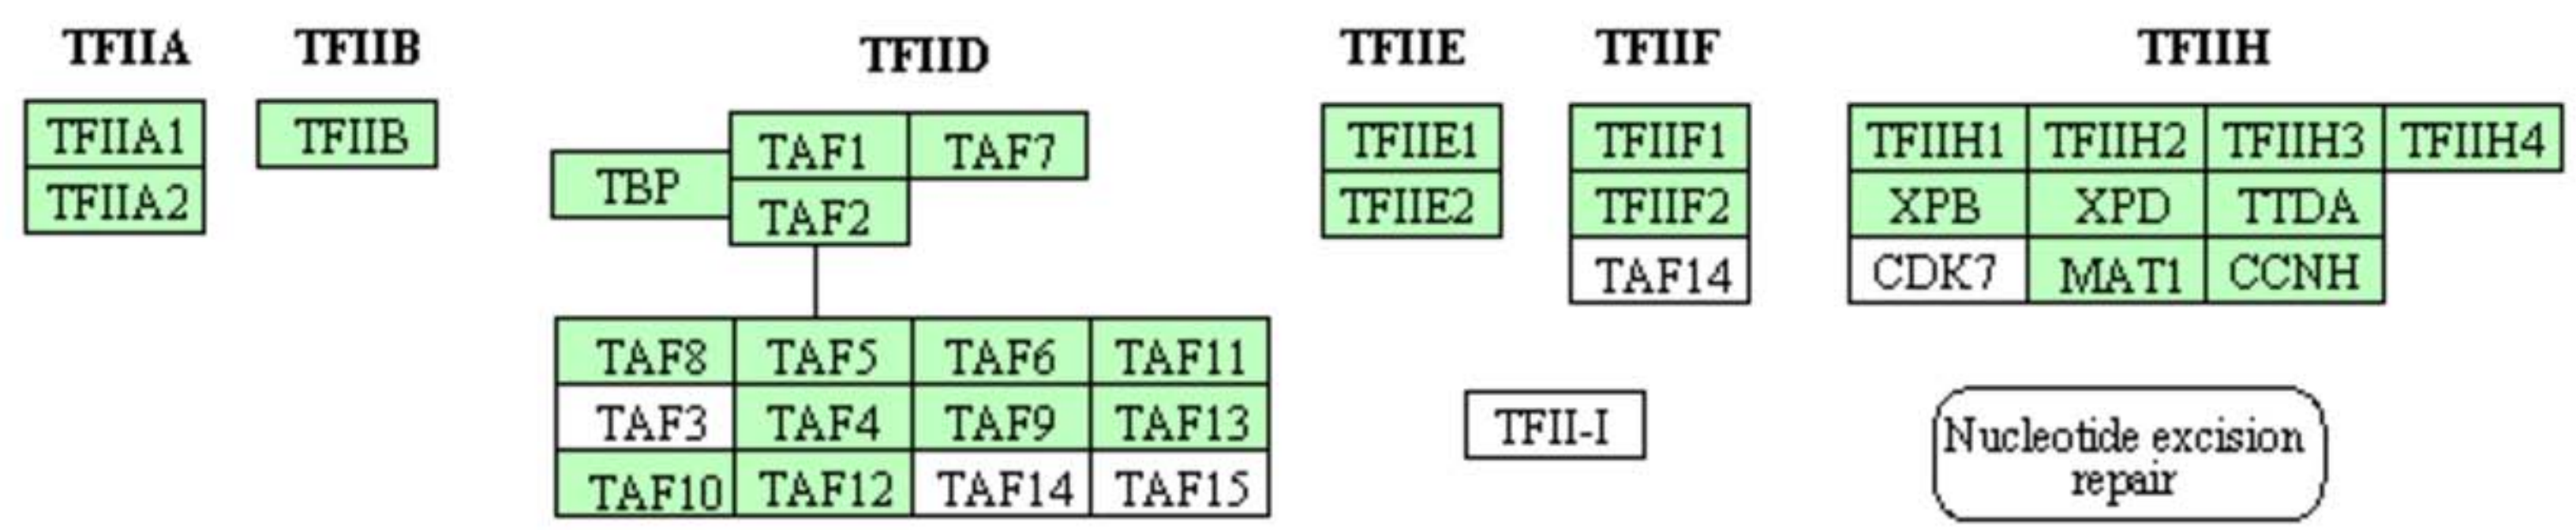



# BASE EXCISION REPAIR

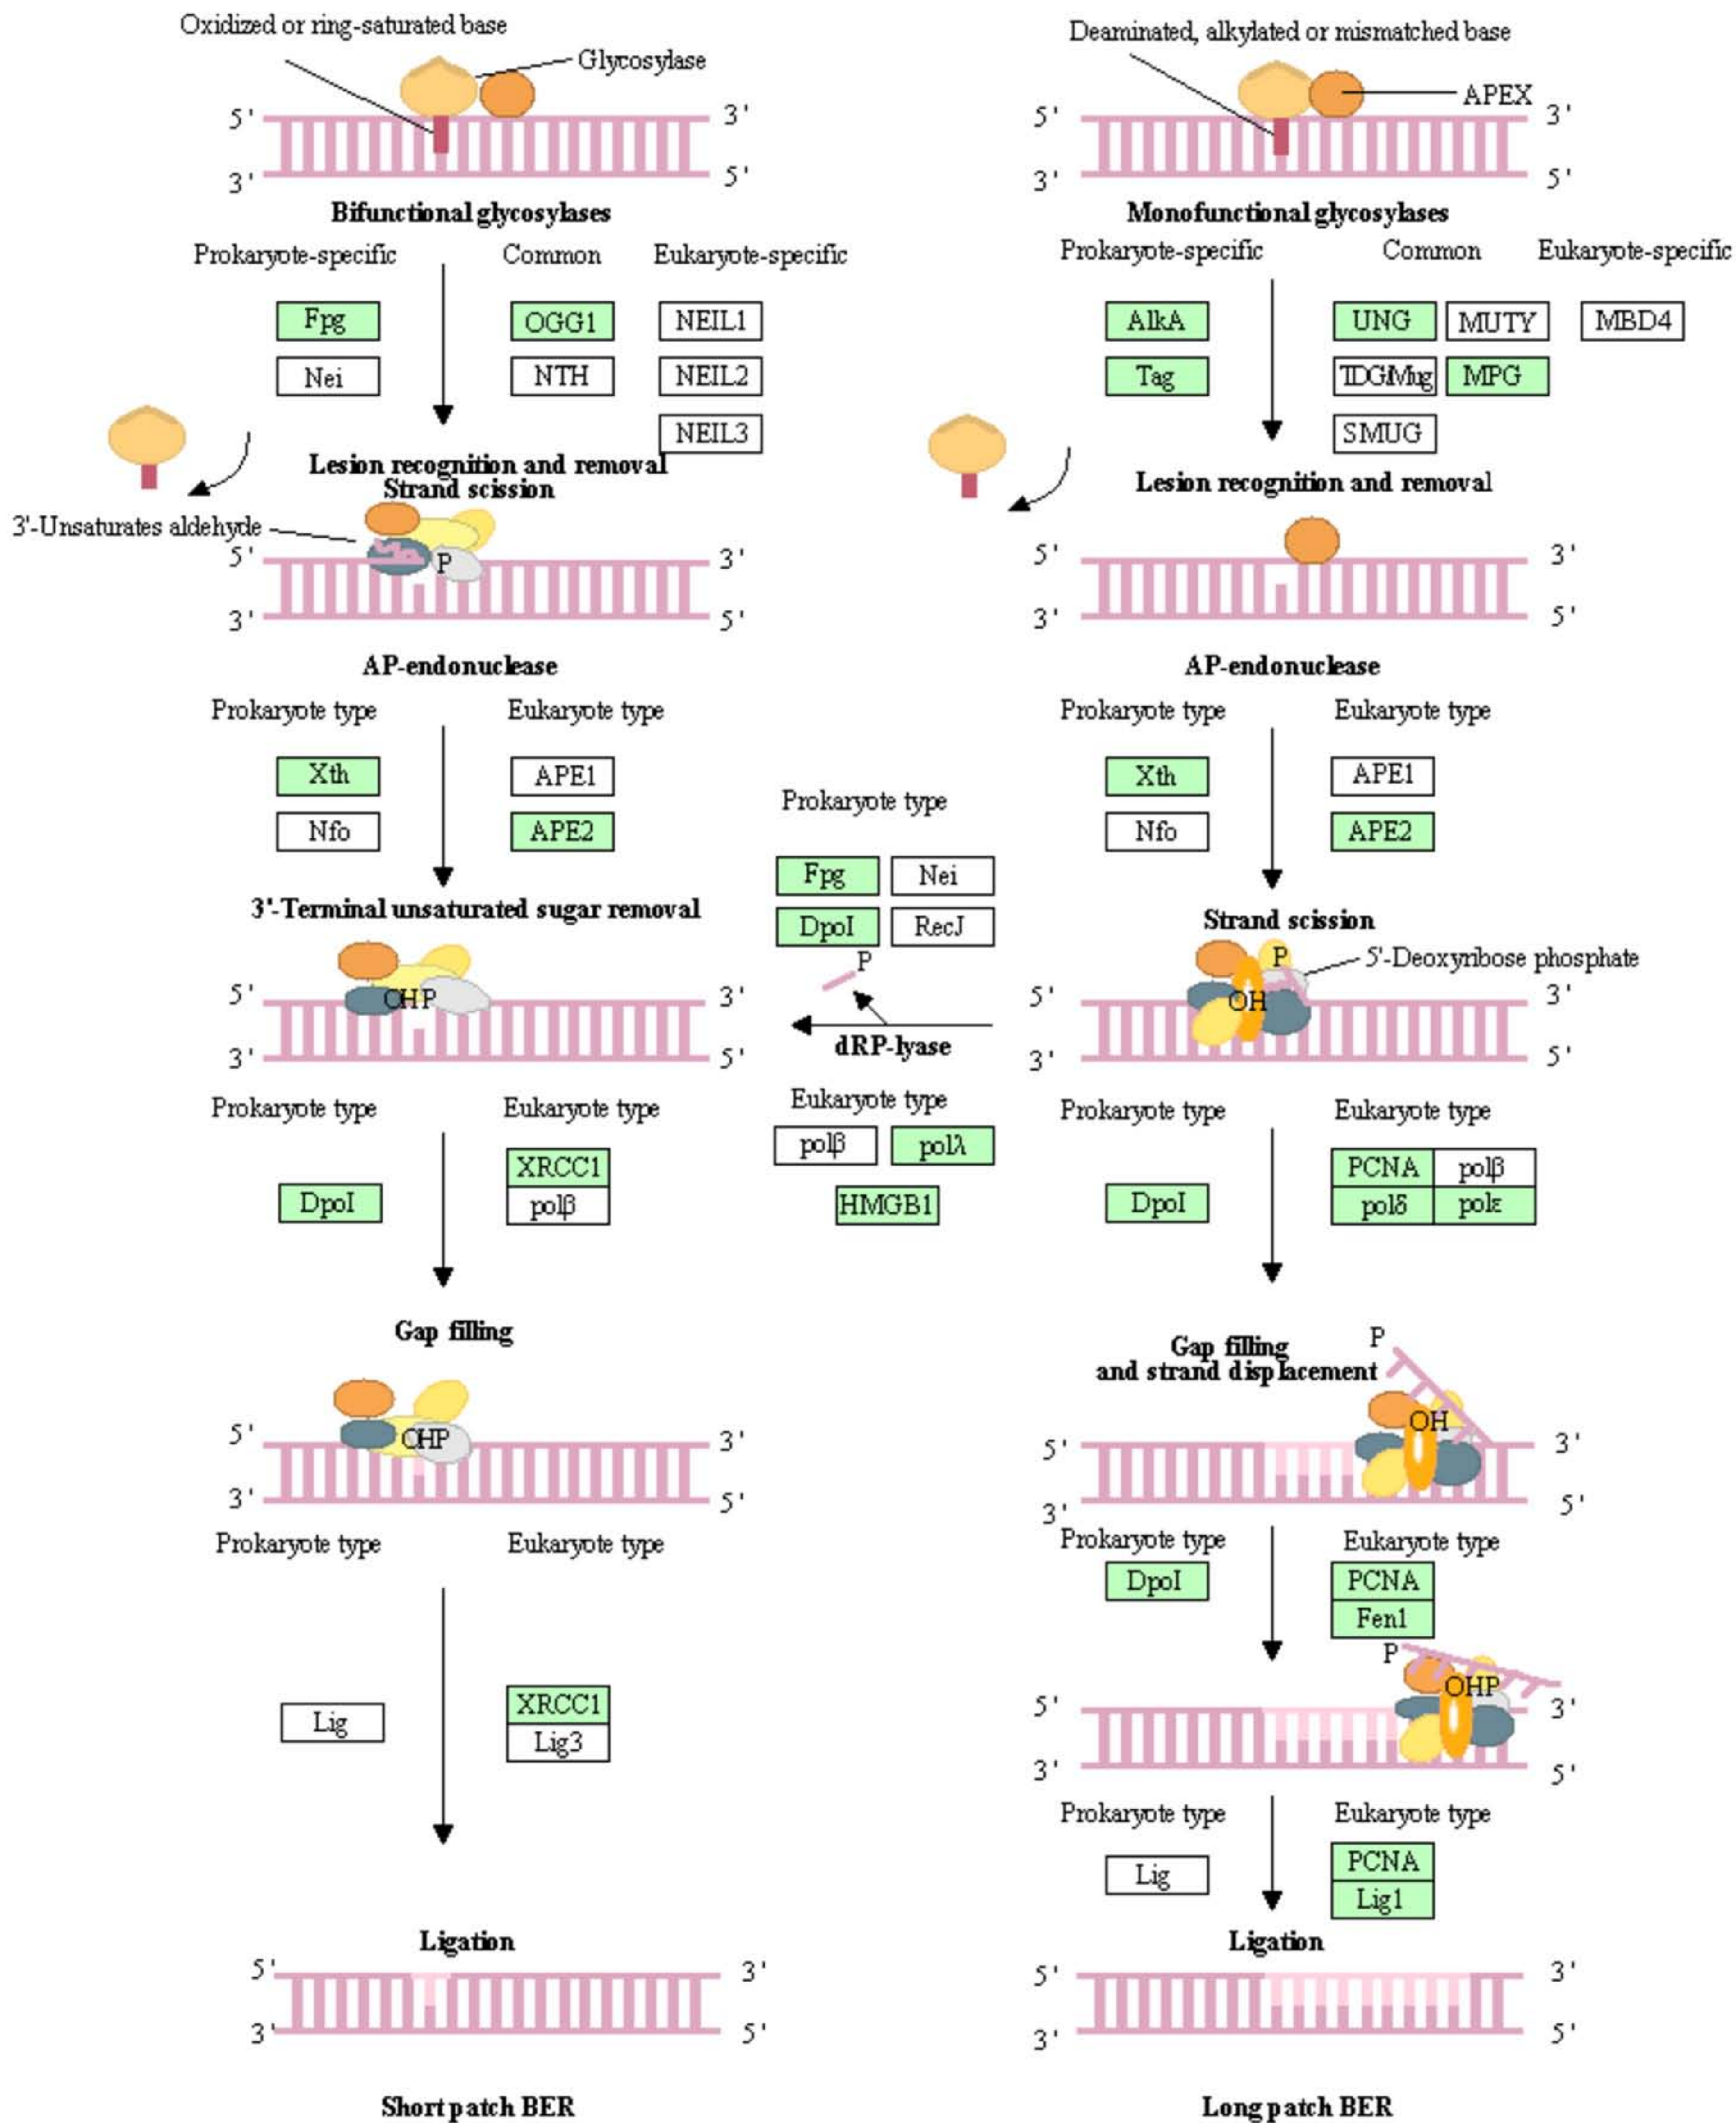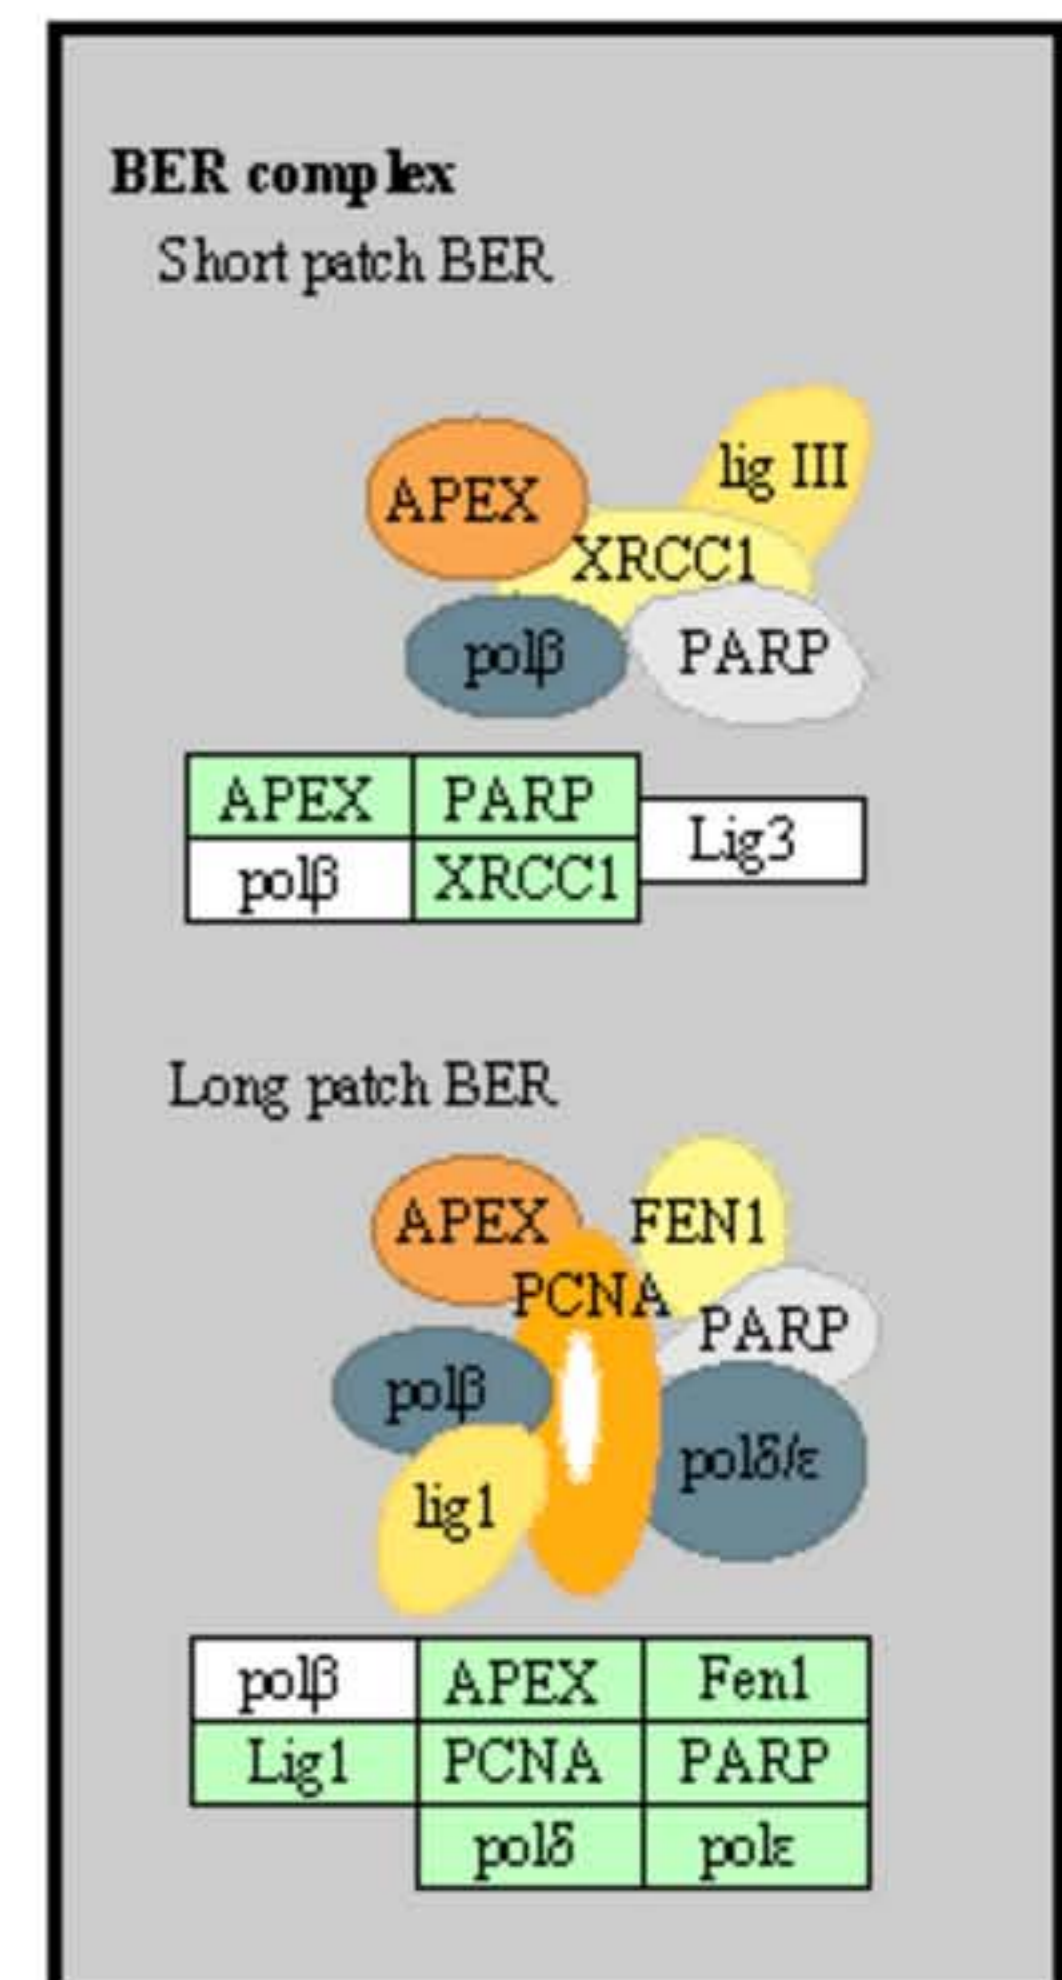







# β-ALANINE METABOLISM

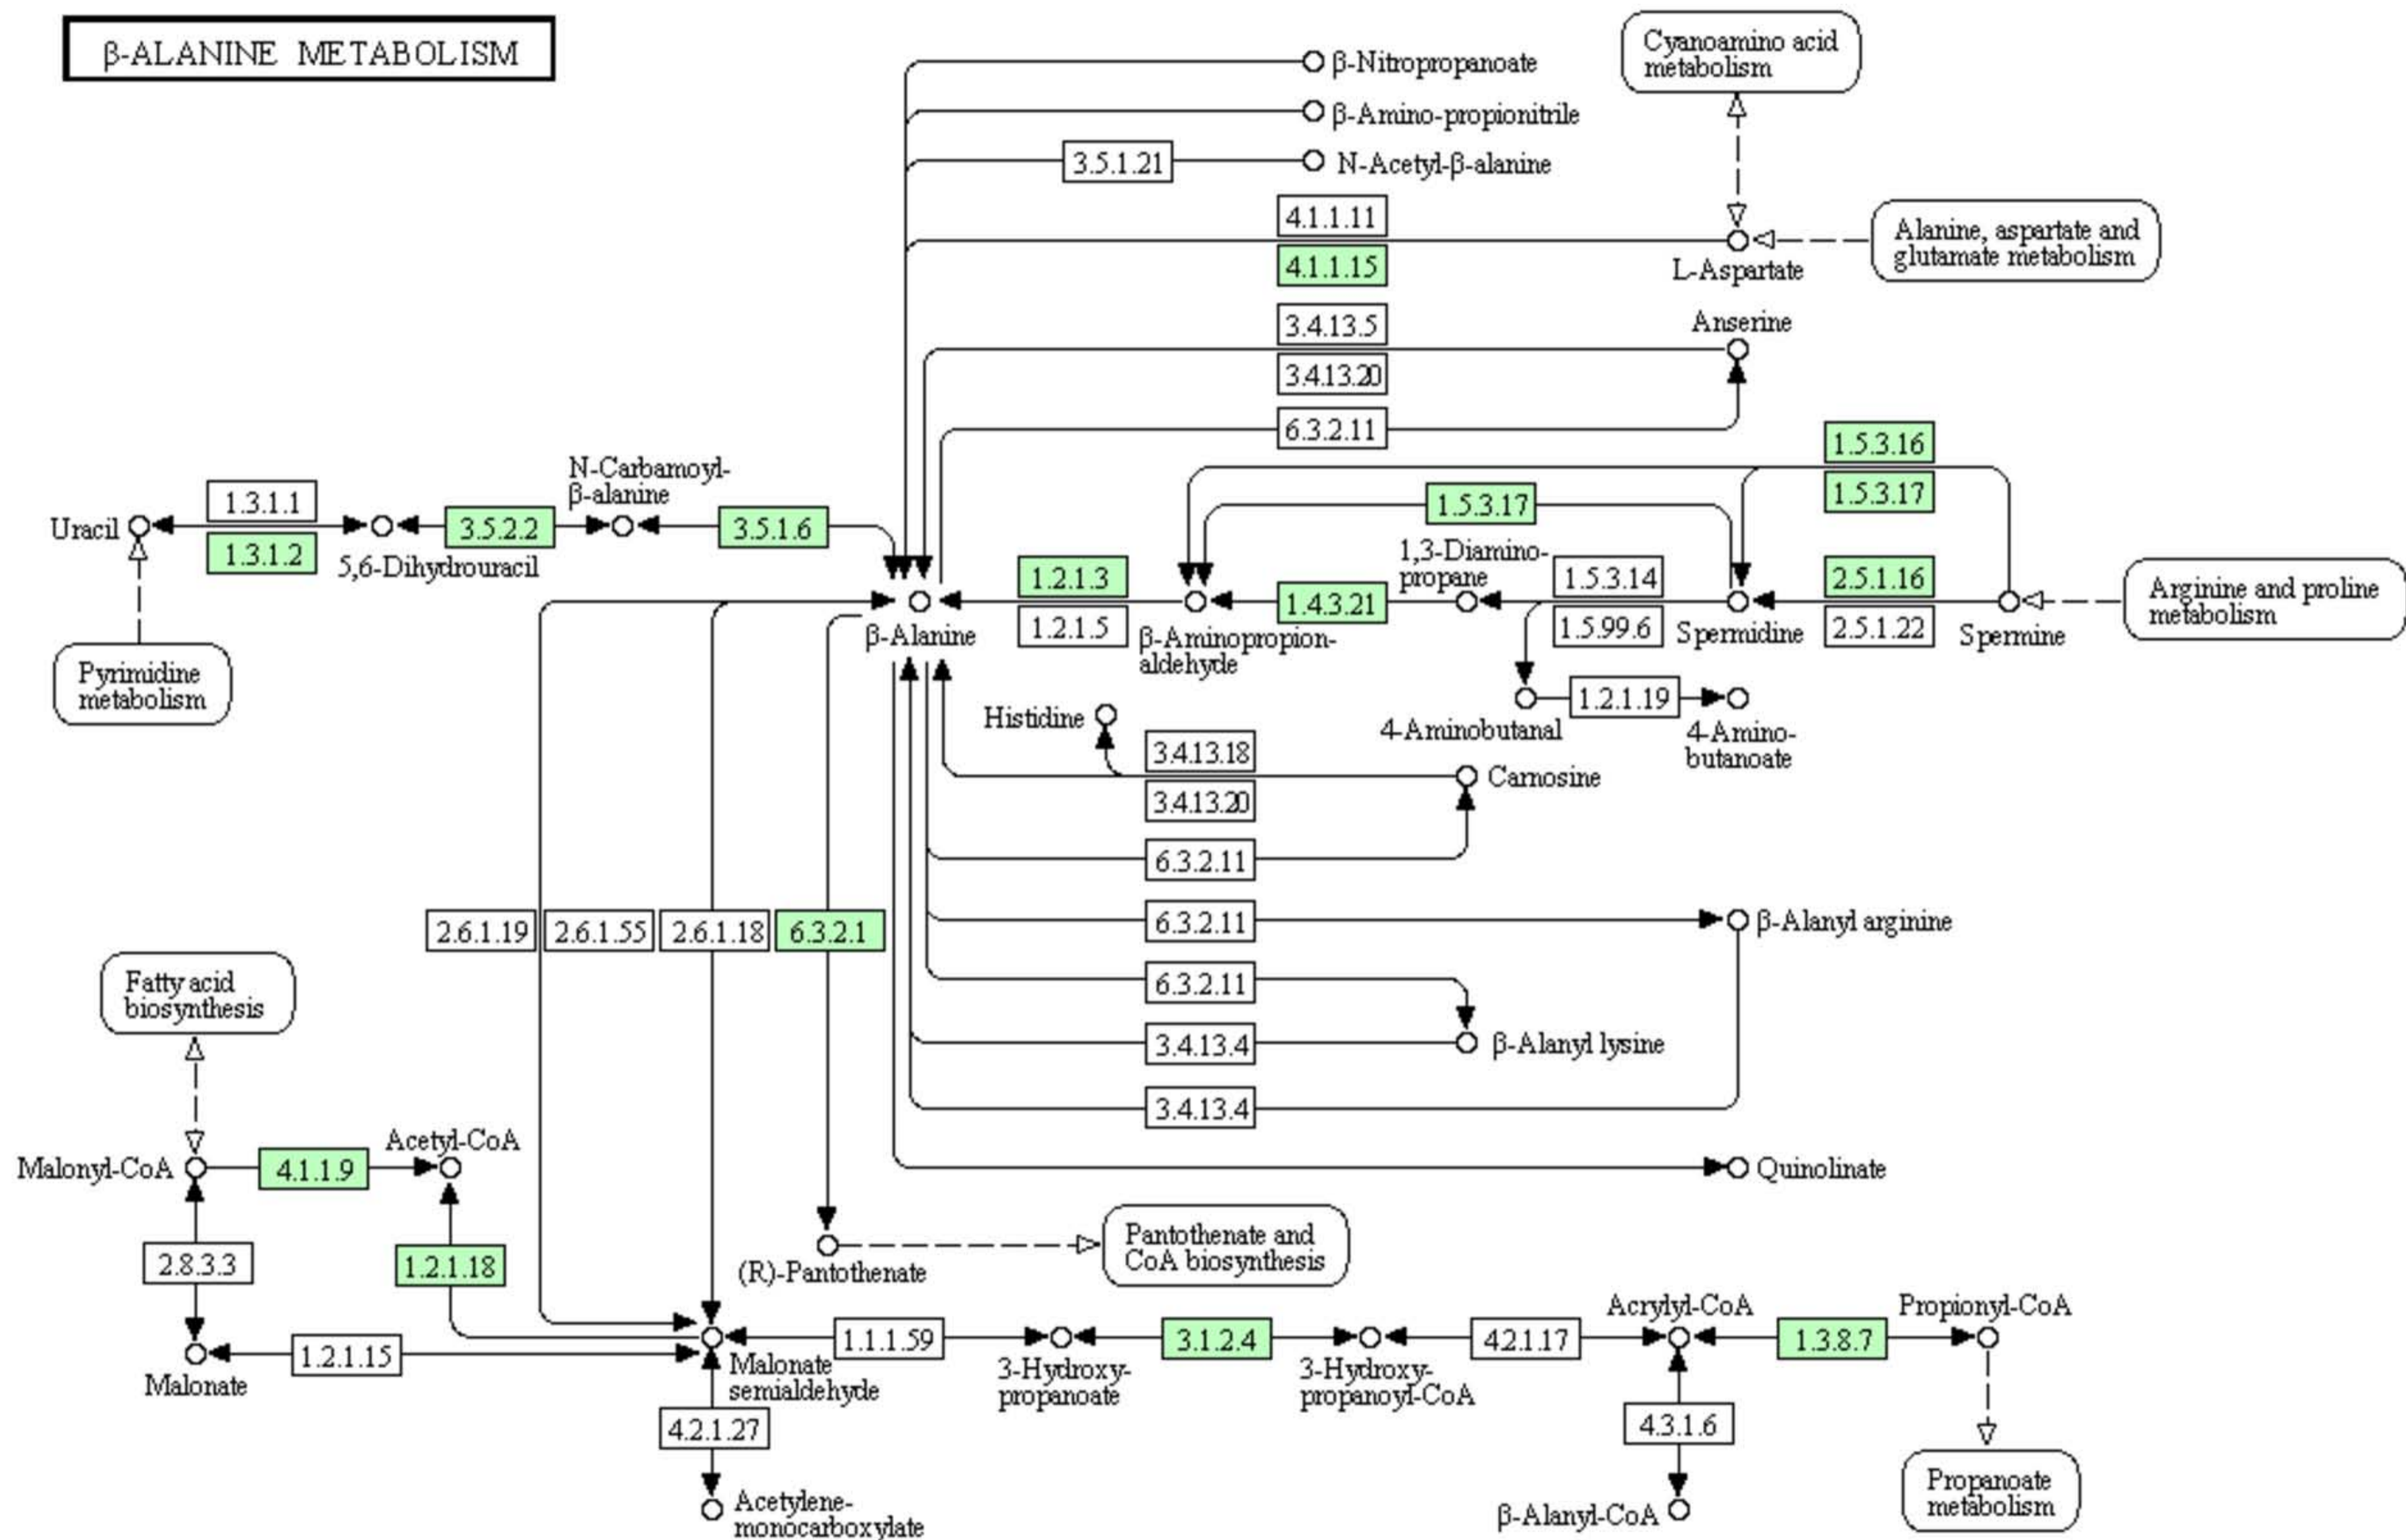



# BIOSYNTHESIS OF AMINO ACIDS

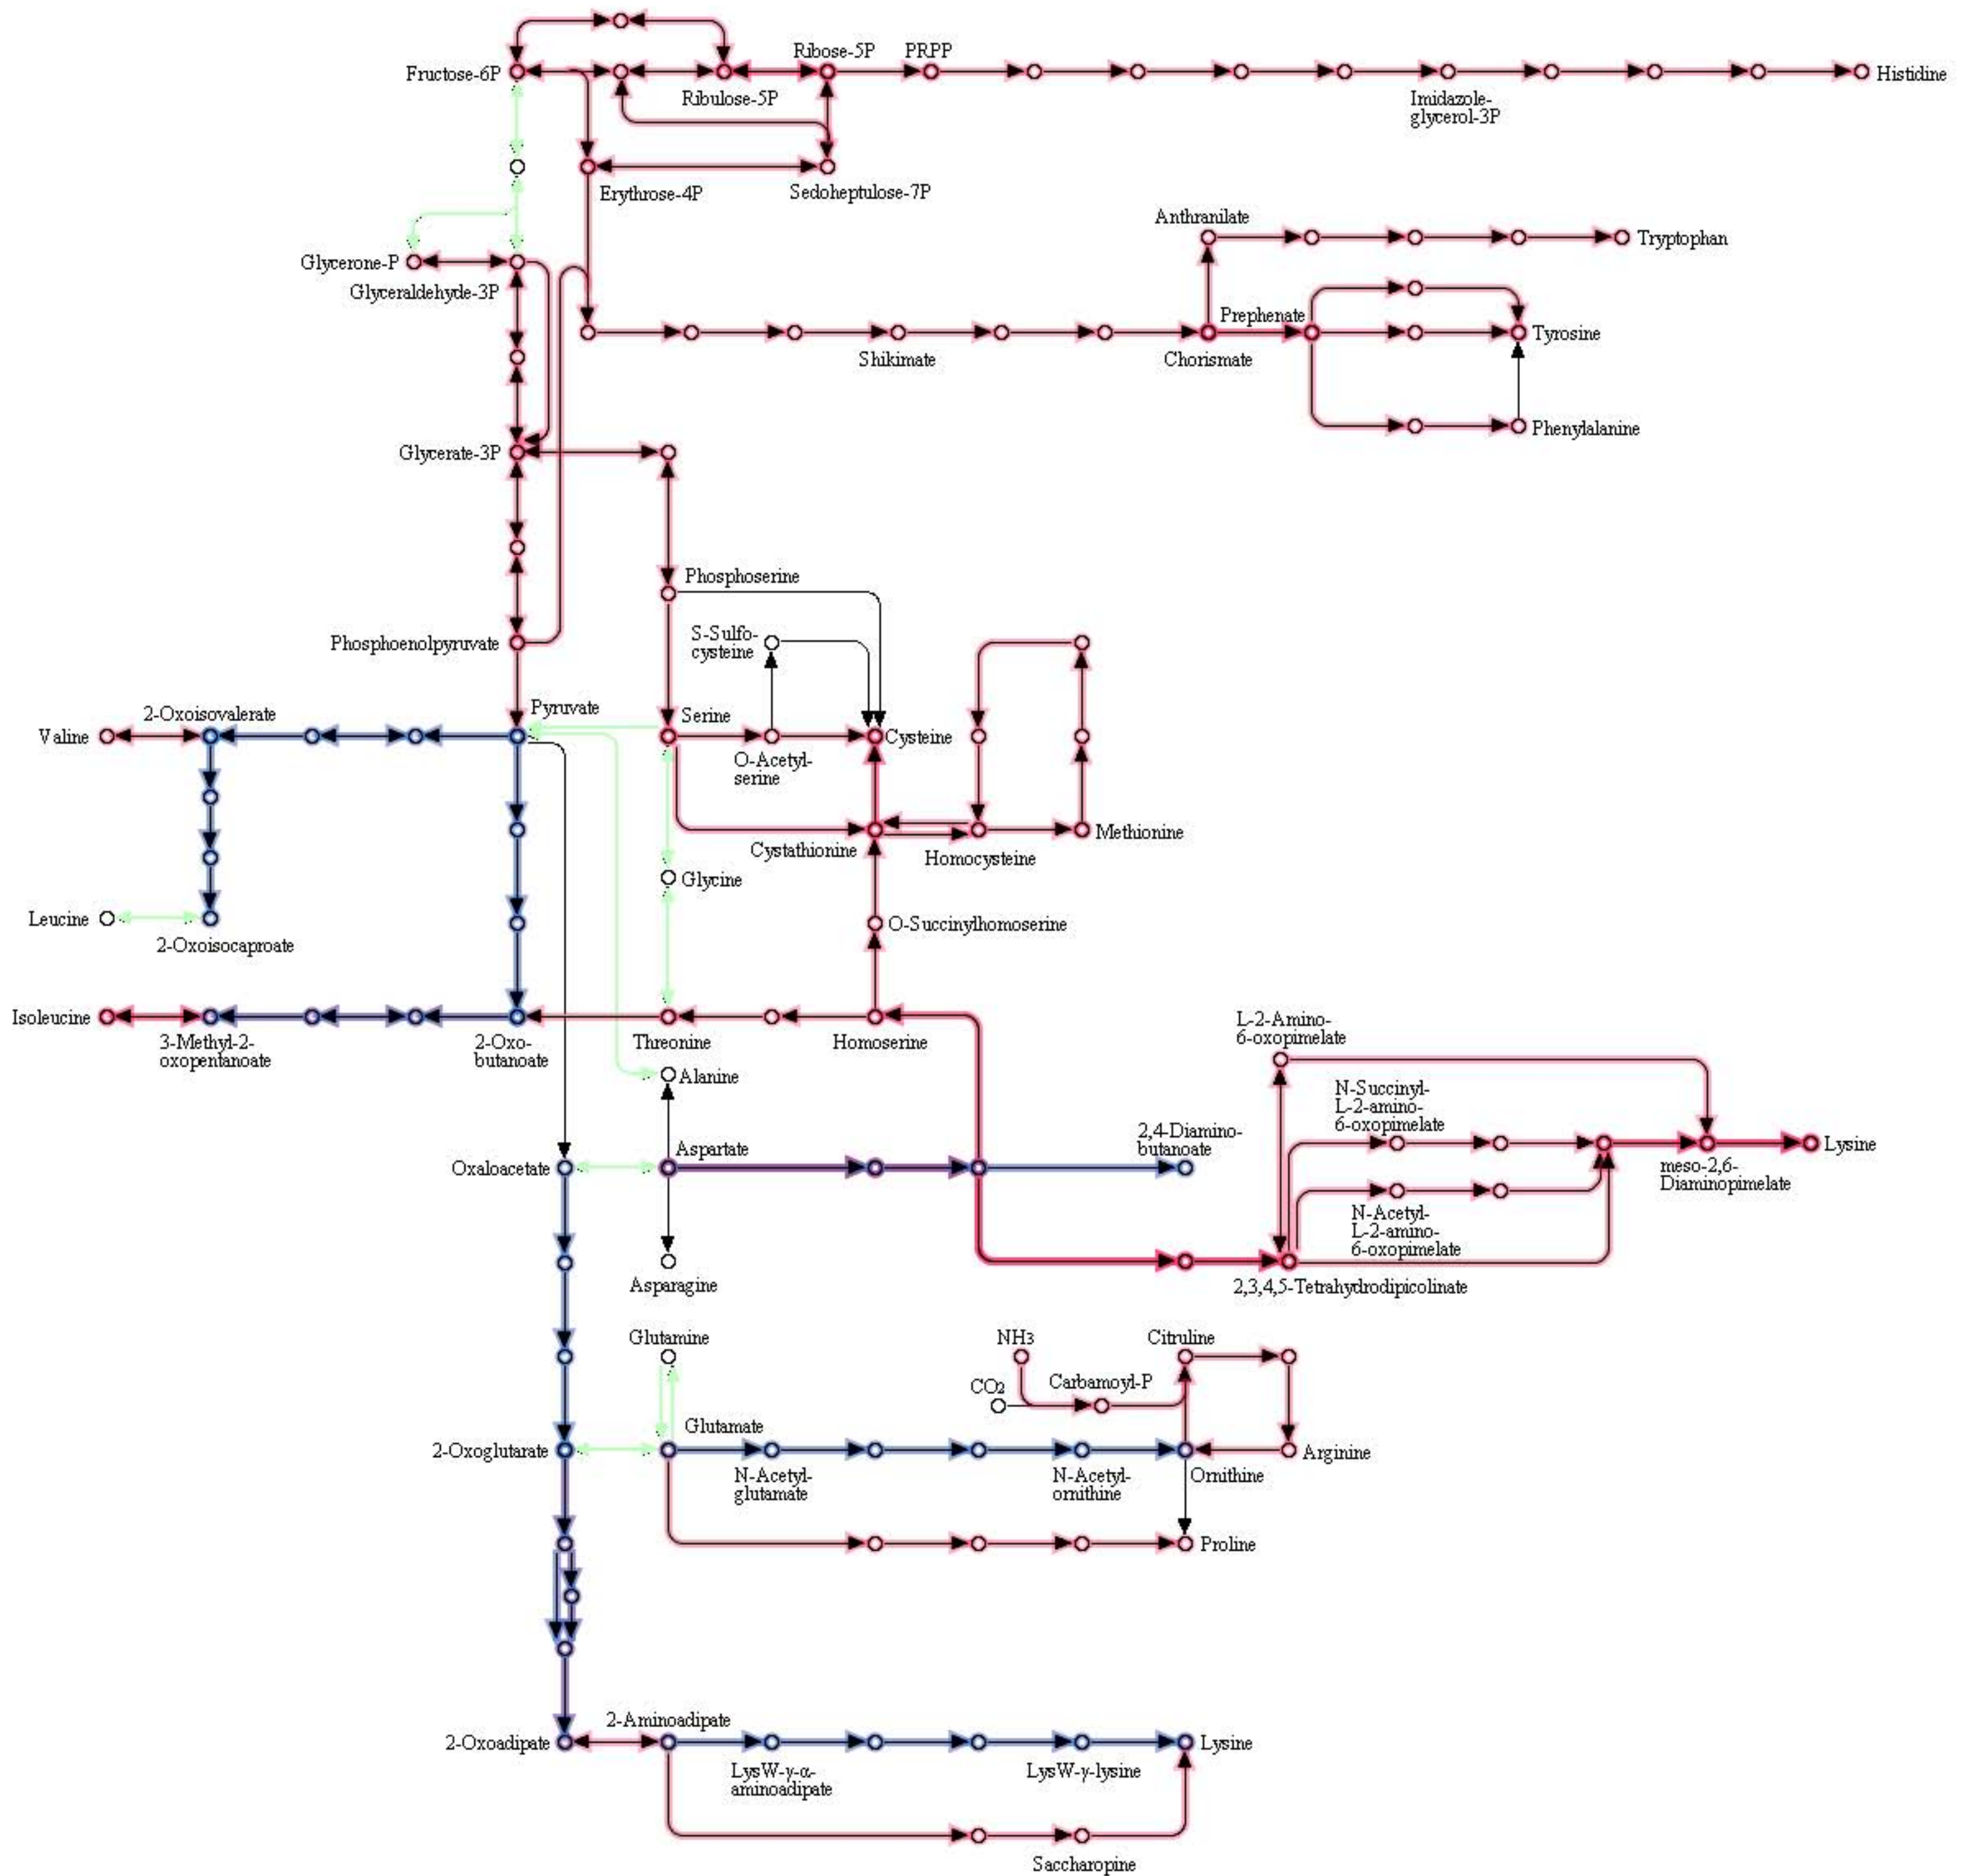



# BIOSYNTHESIS OF UNSATURATED FATTY ACIDS

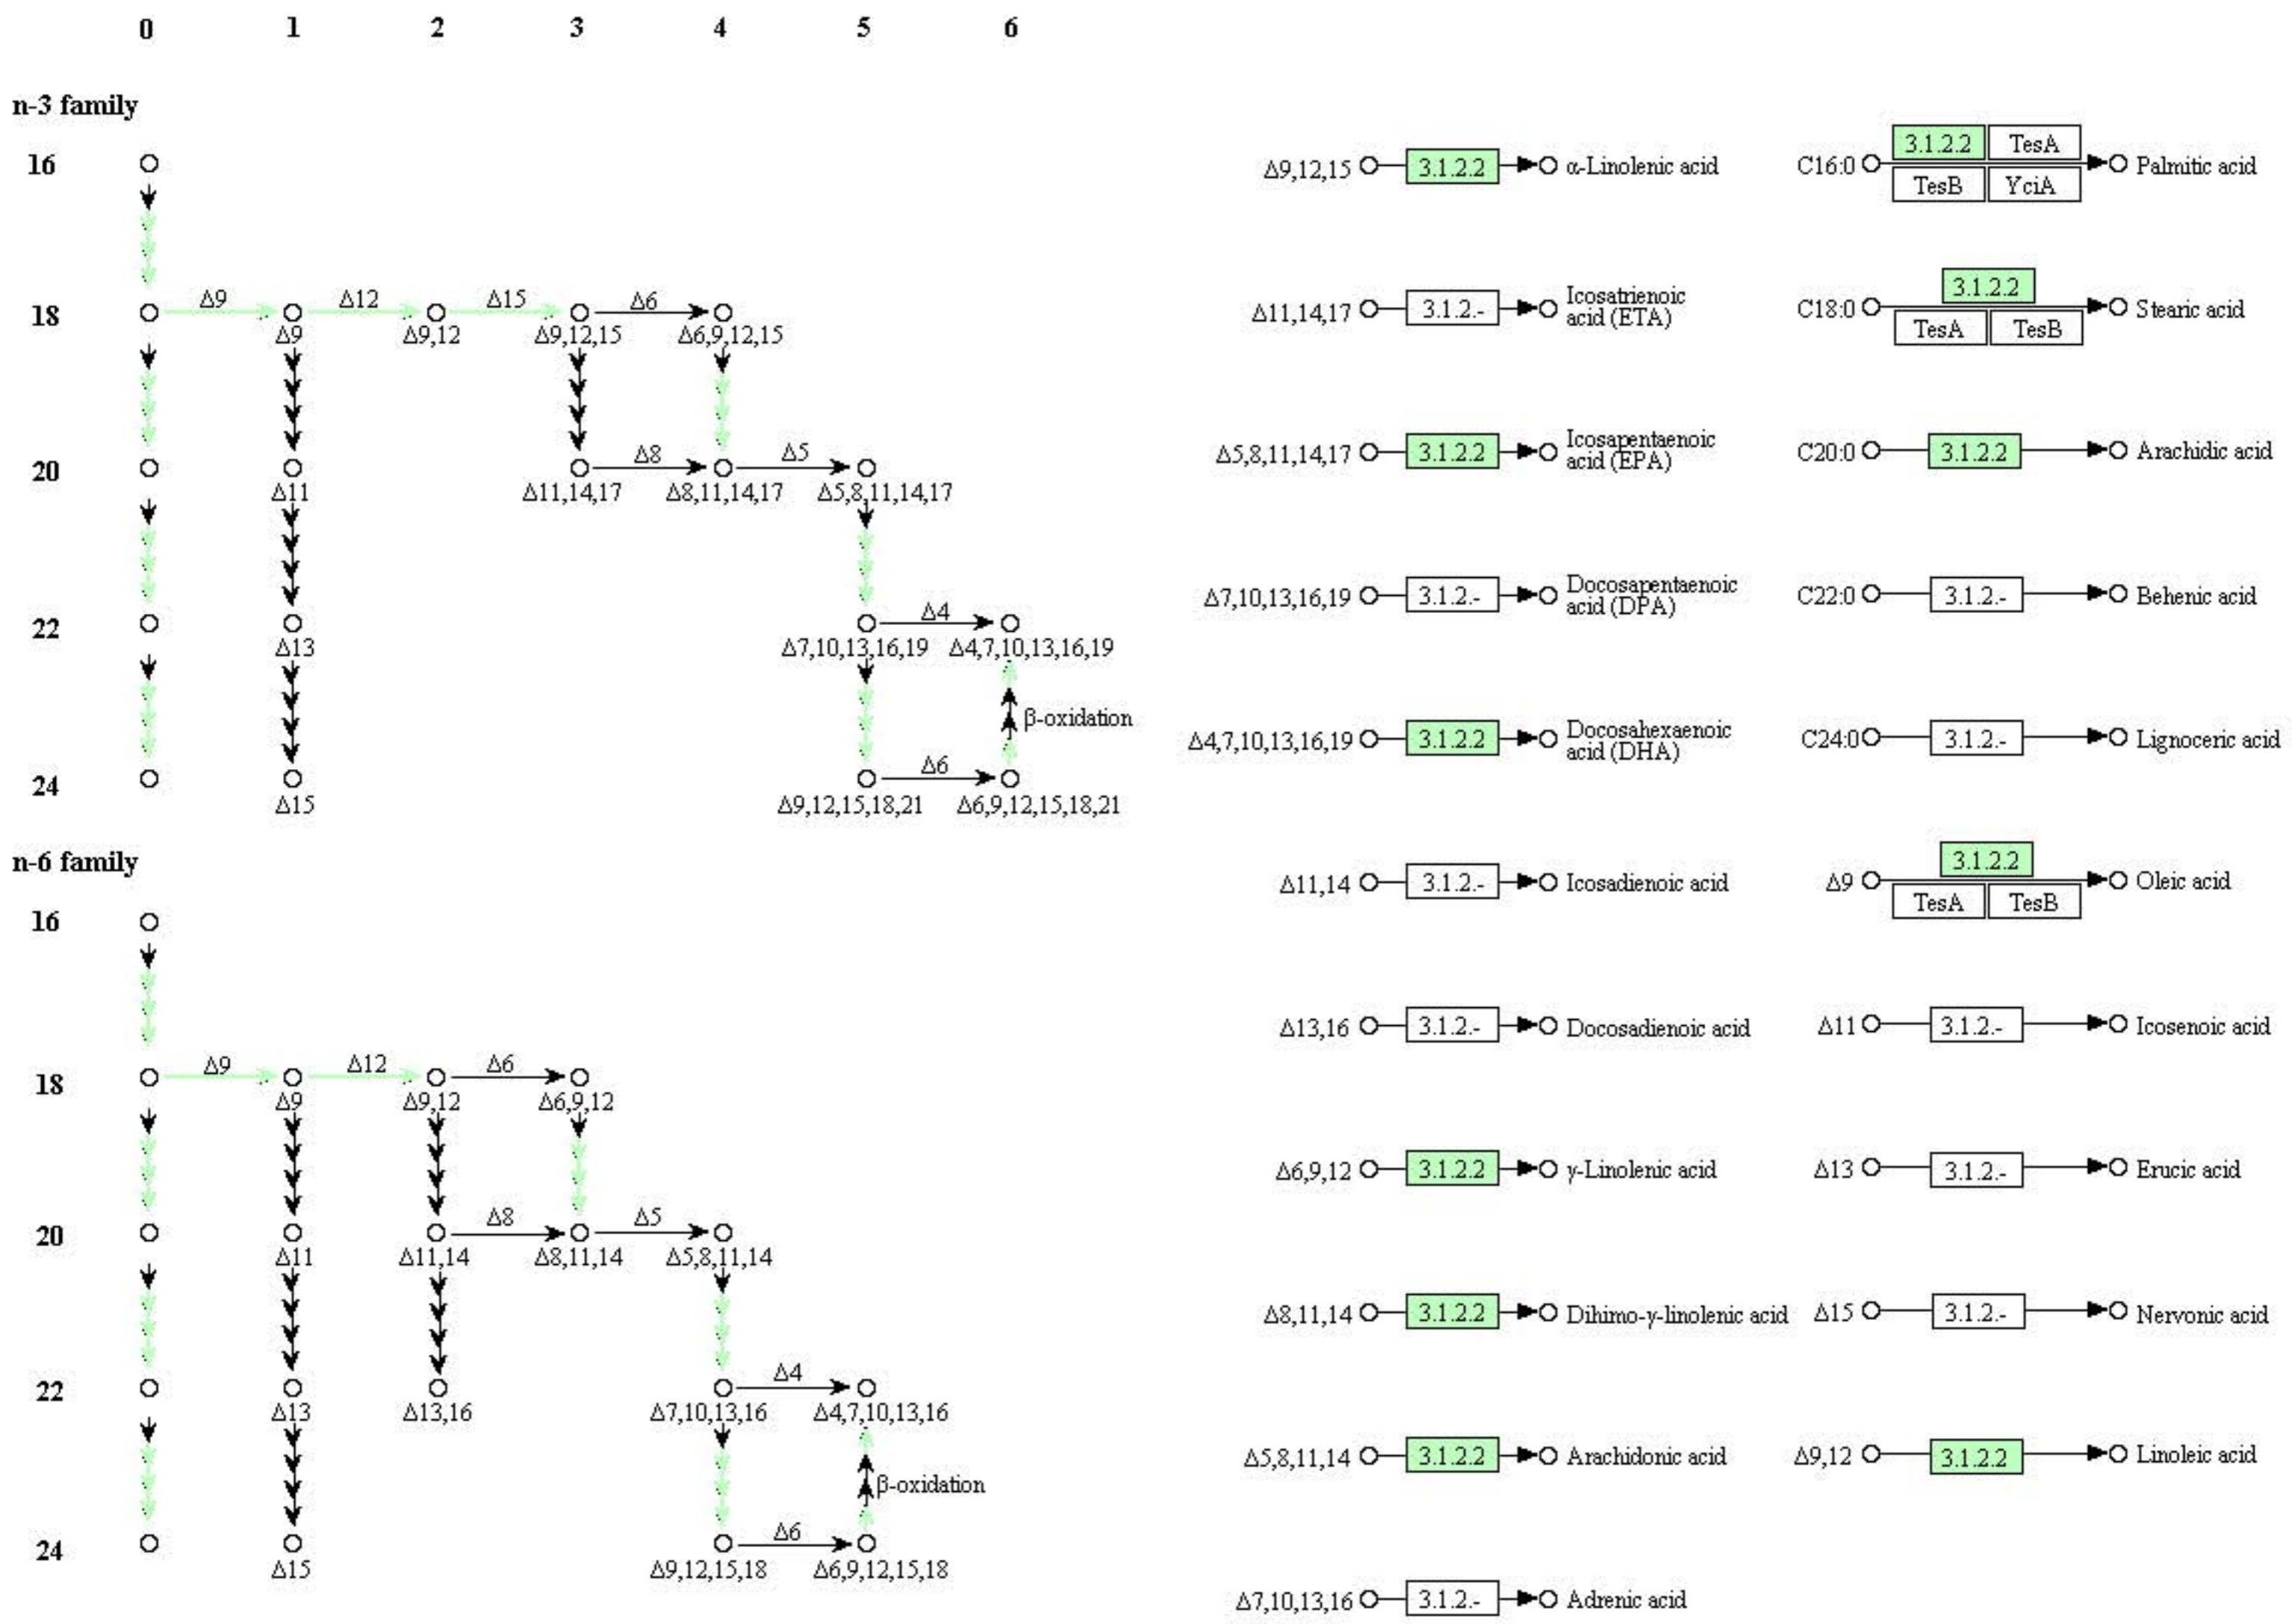



# BIOTIN METABOLISM

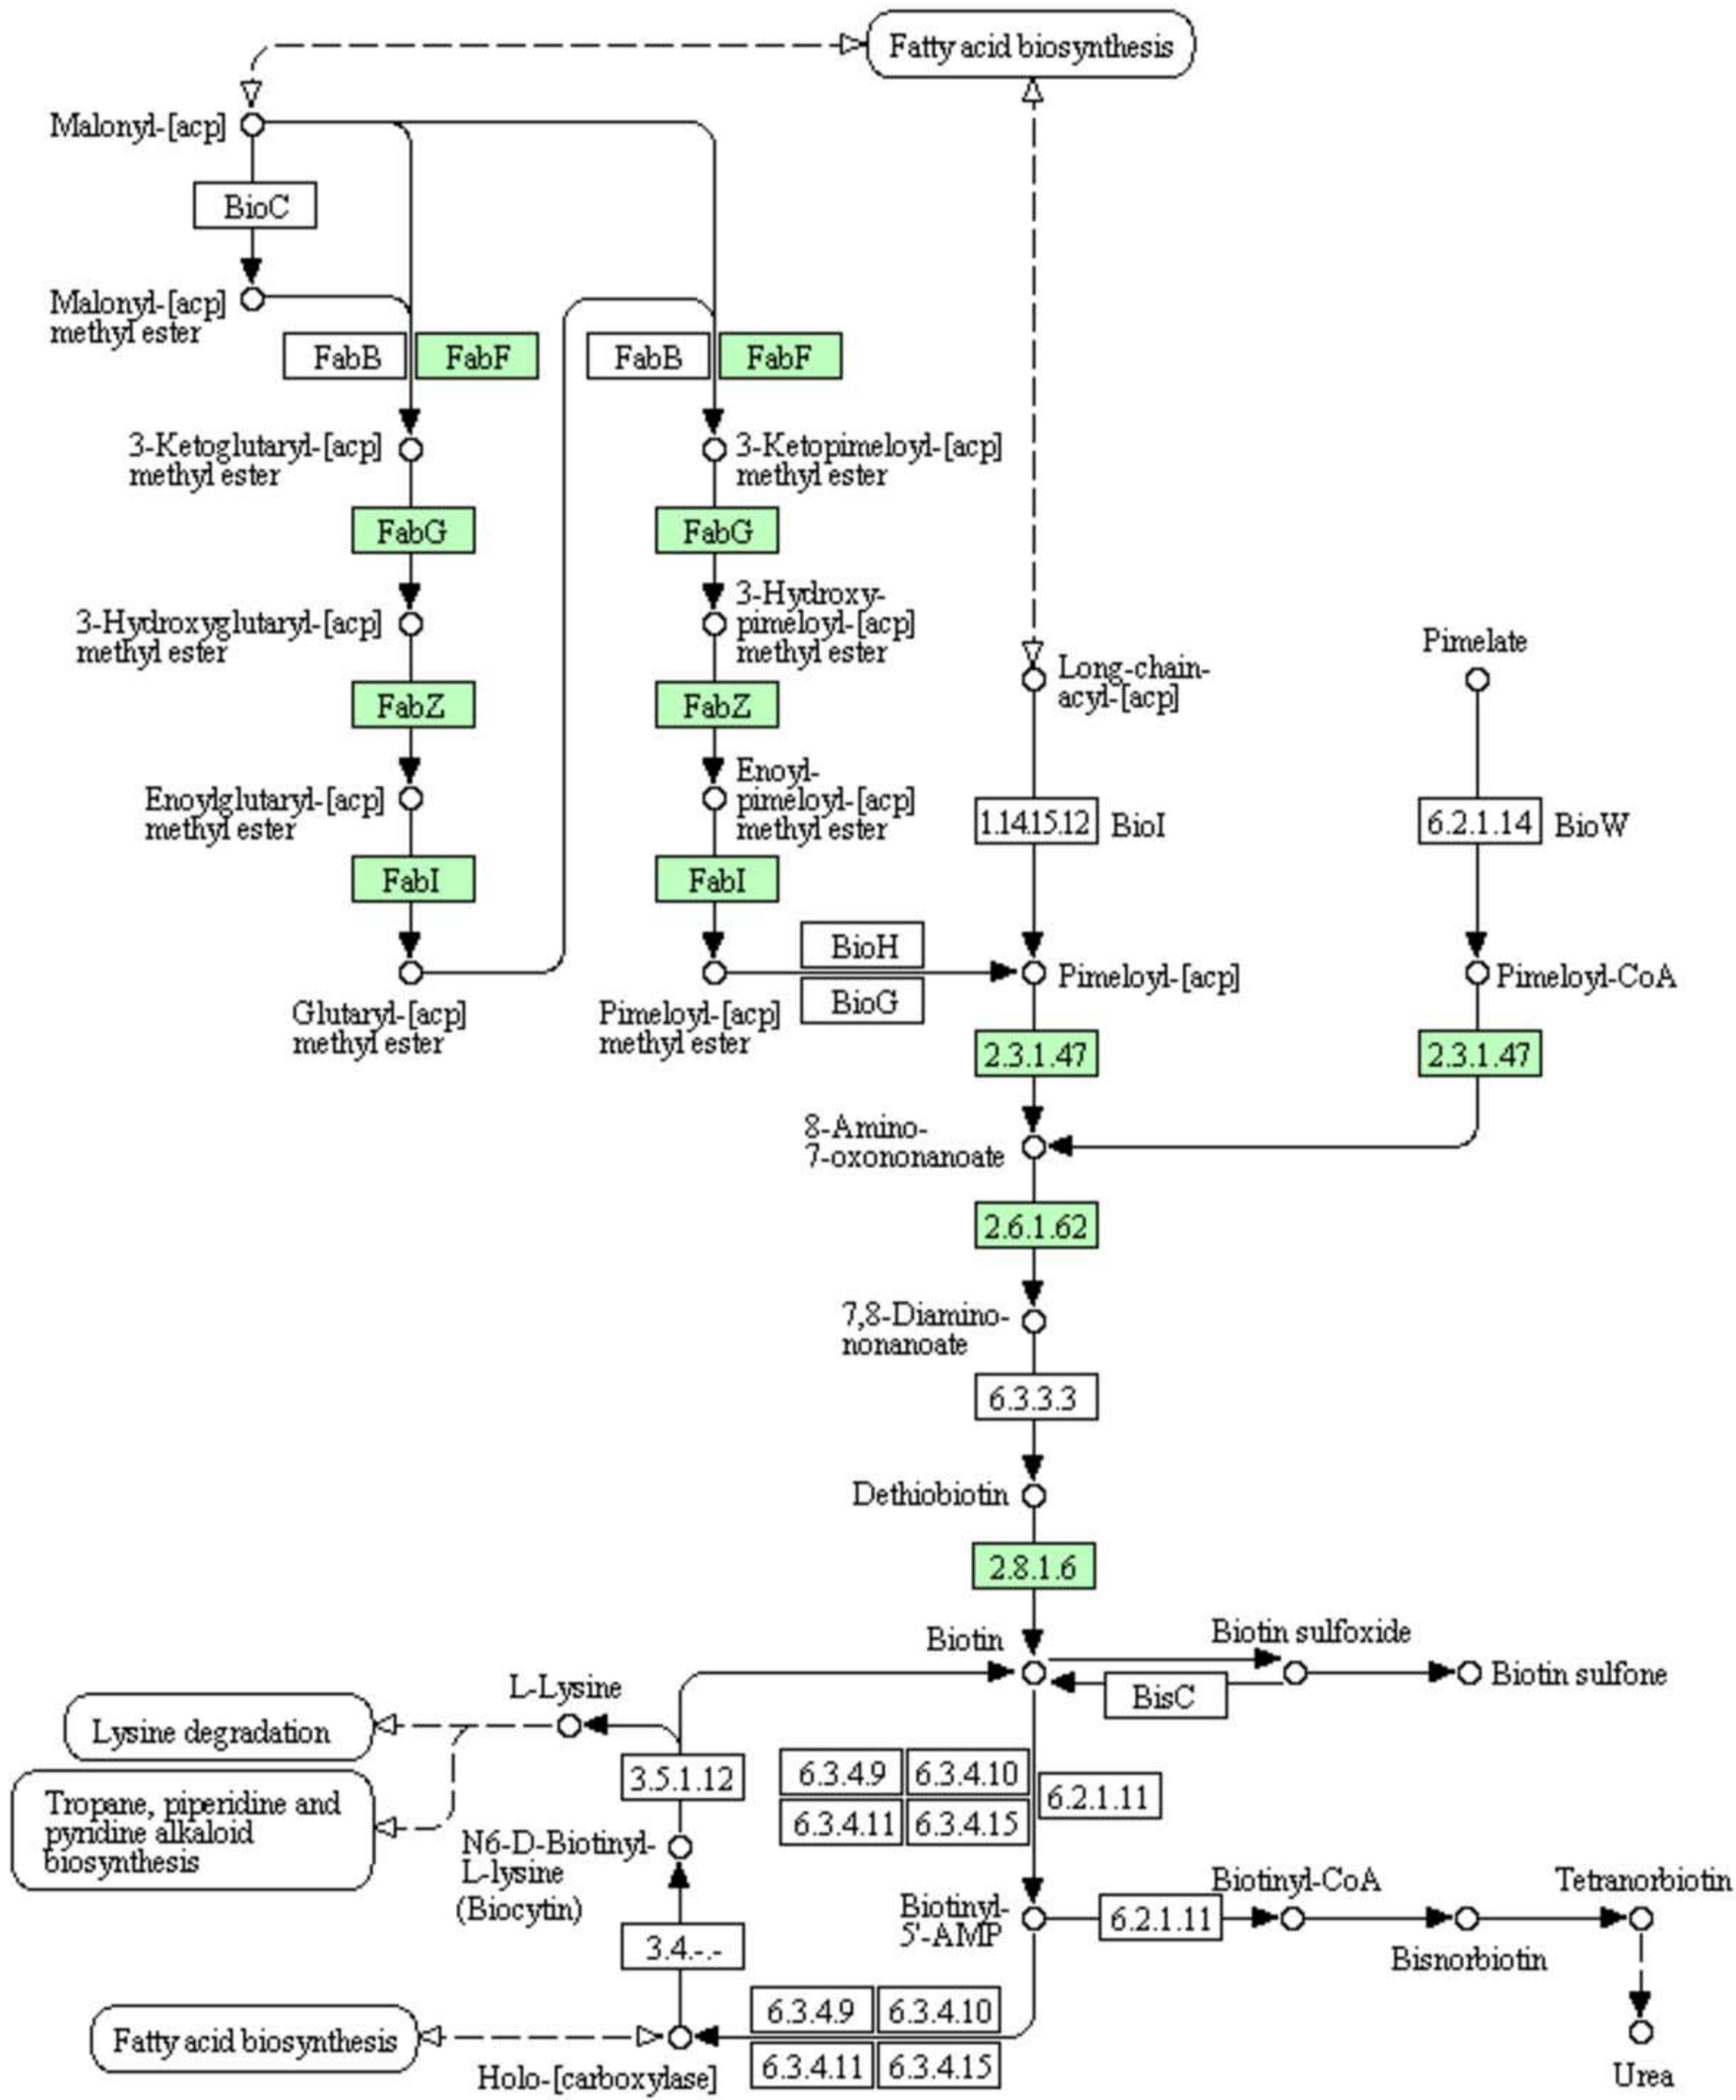



**BISPHENOL DEGRADATION**

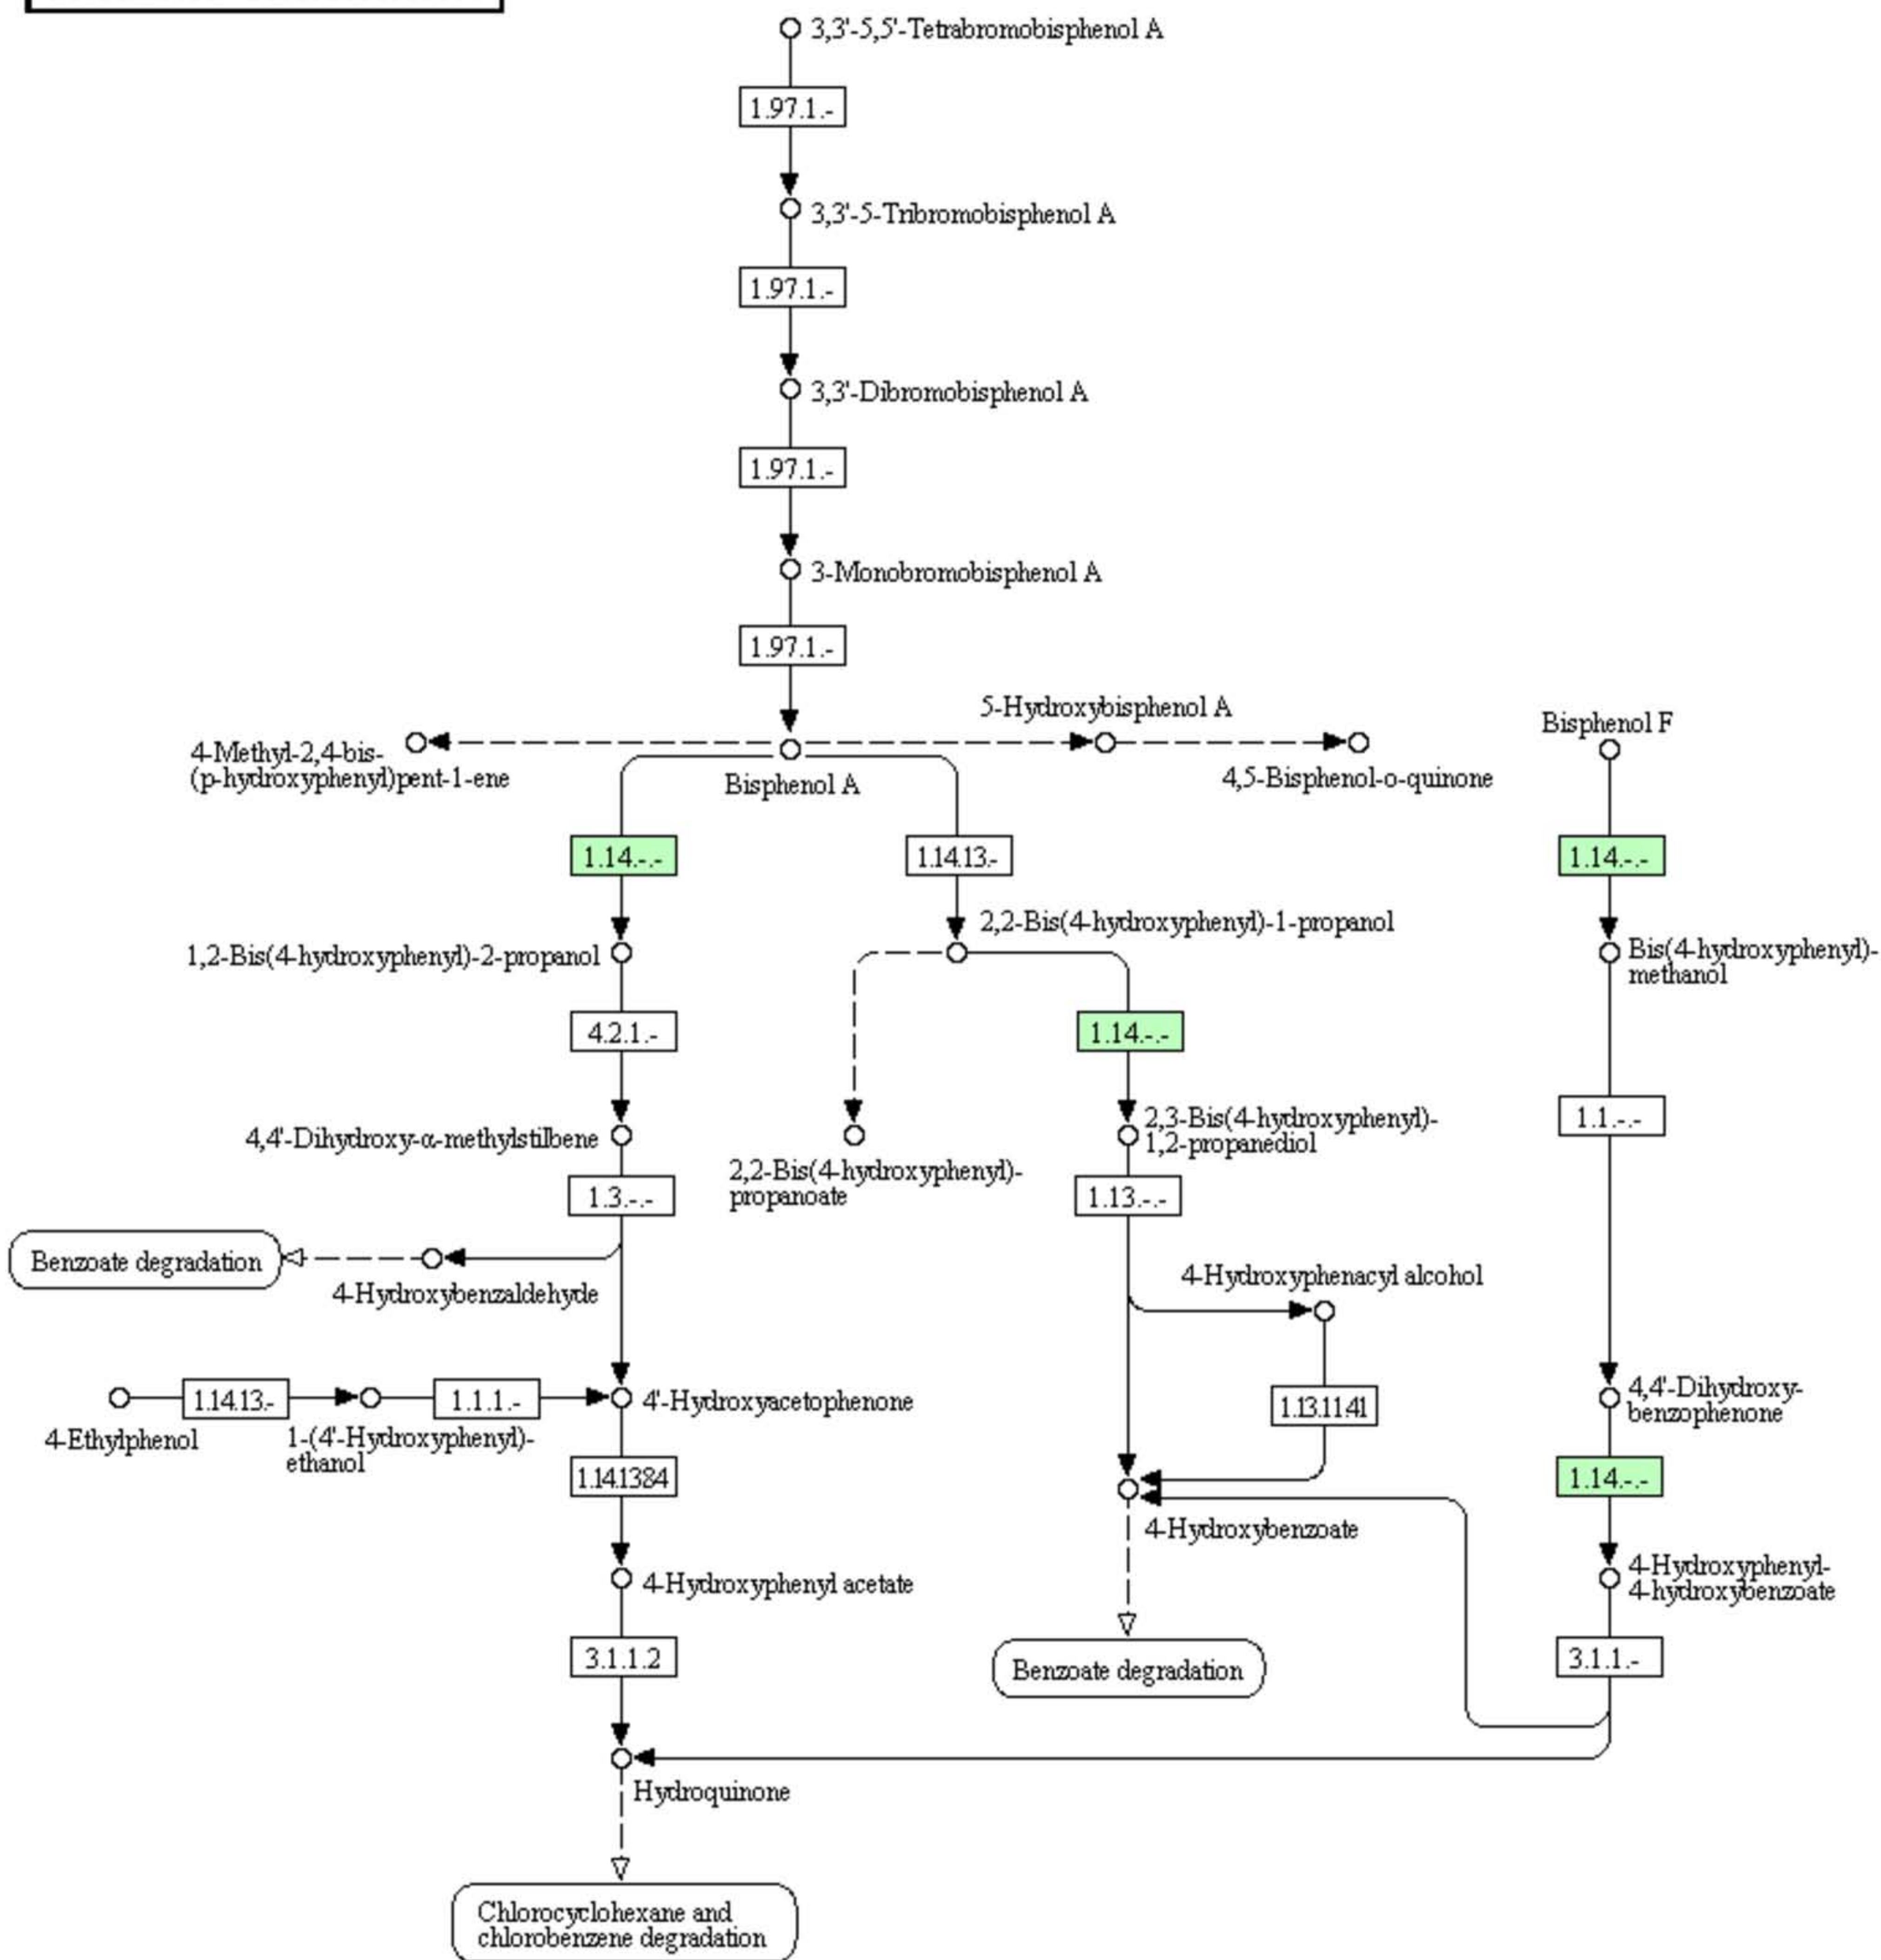



# BRASSINOSTEROID BIOSYNTHESIS

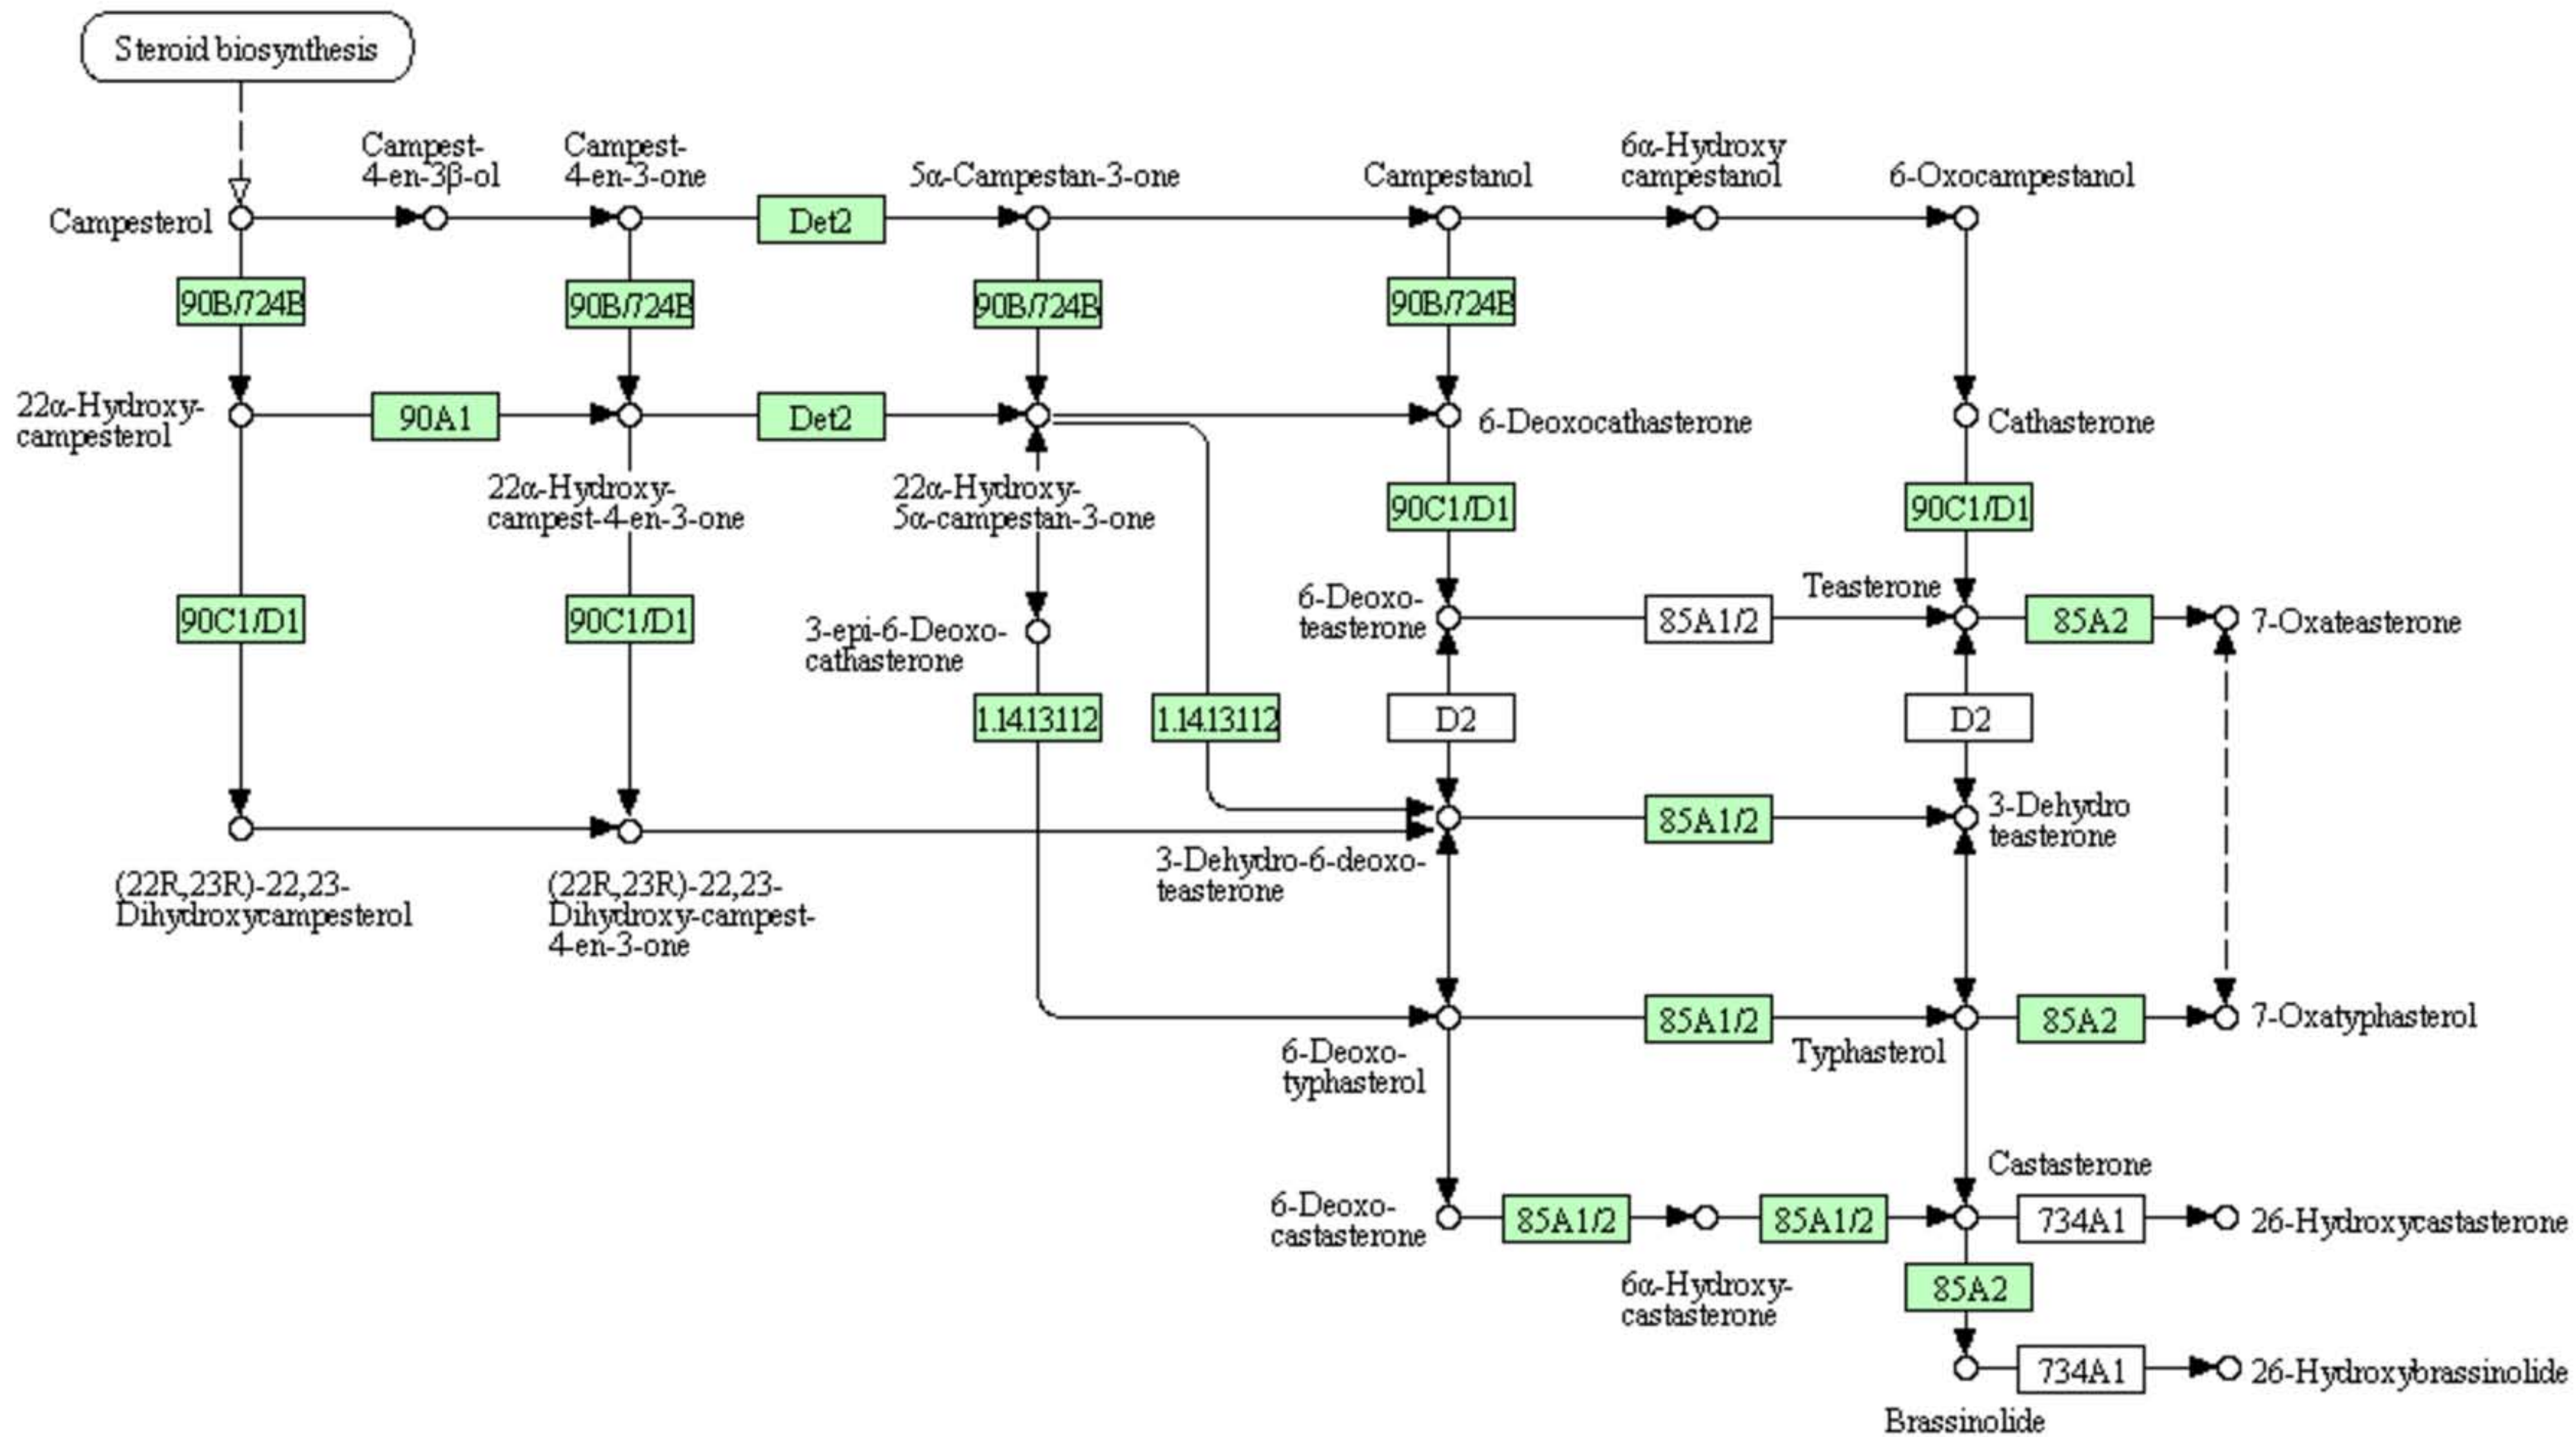



# BUTANOATE METABOLISM

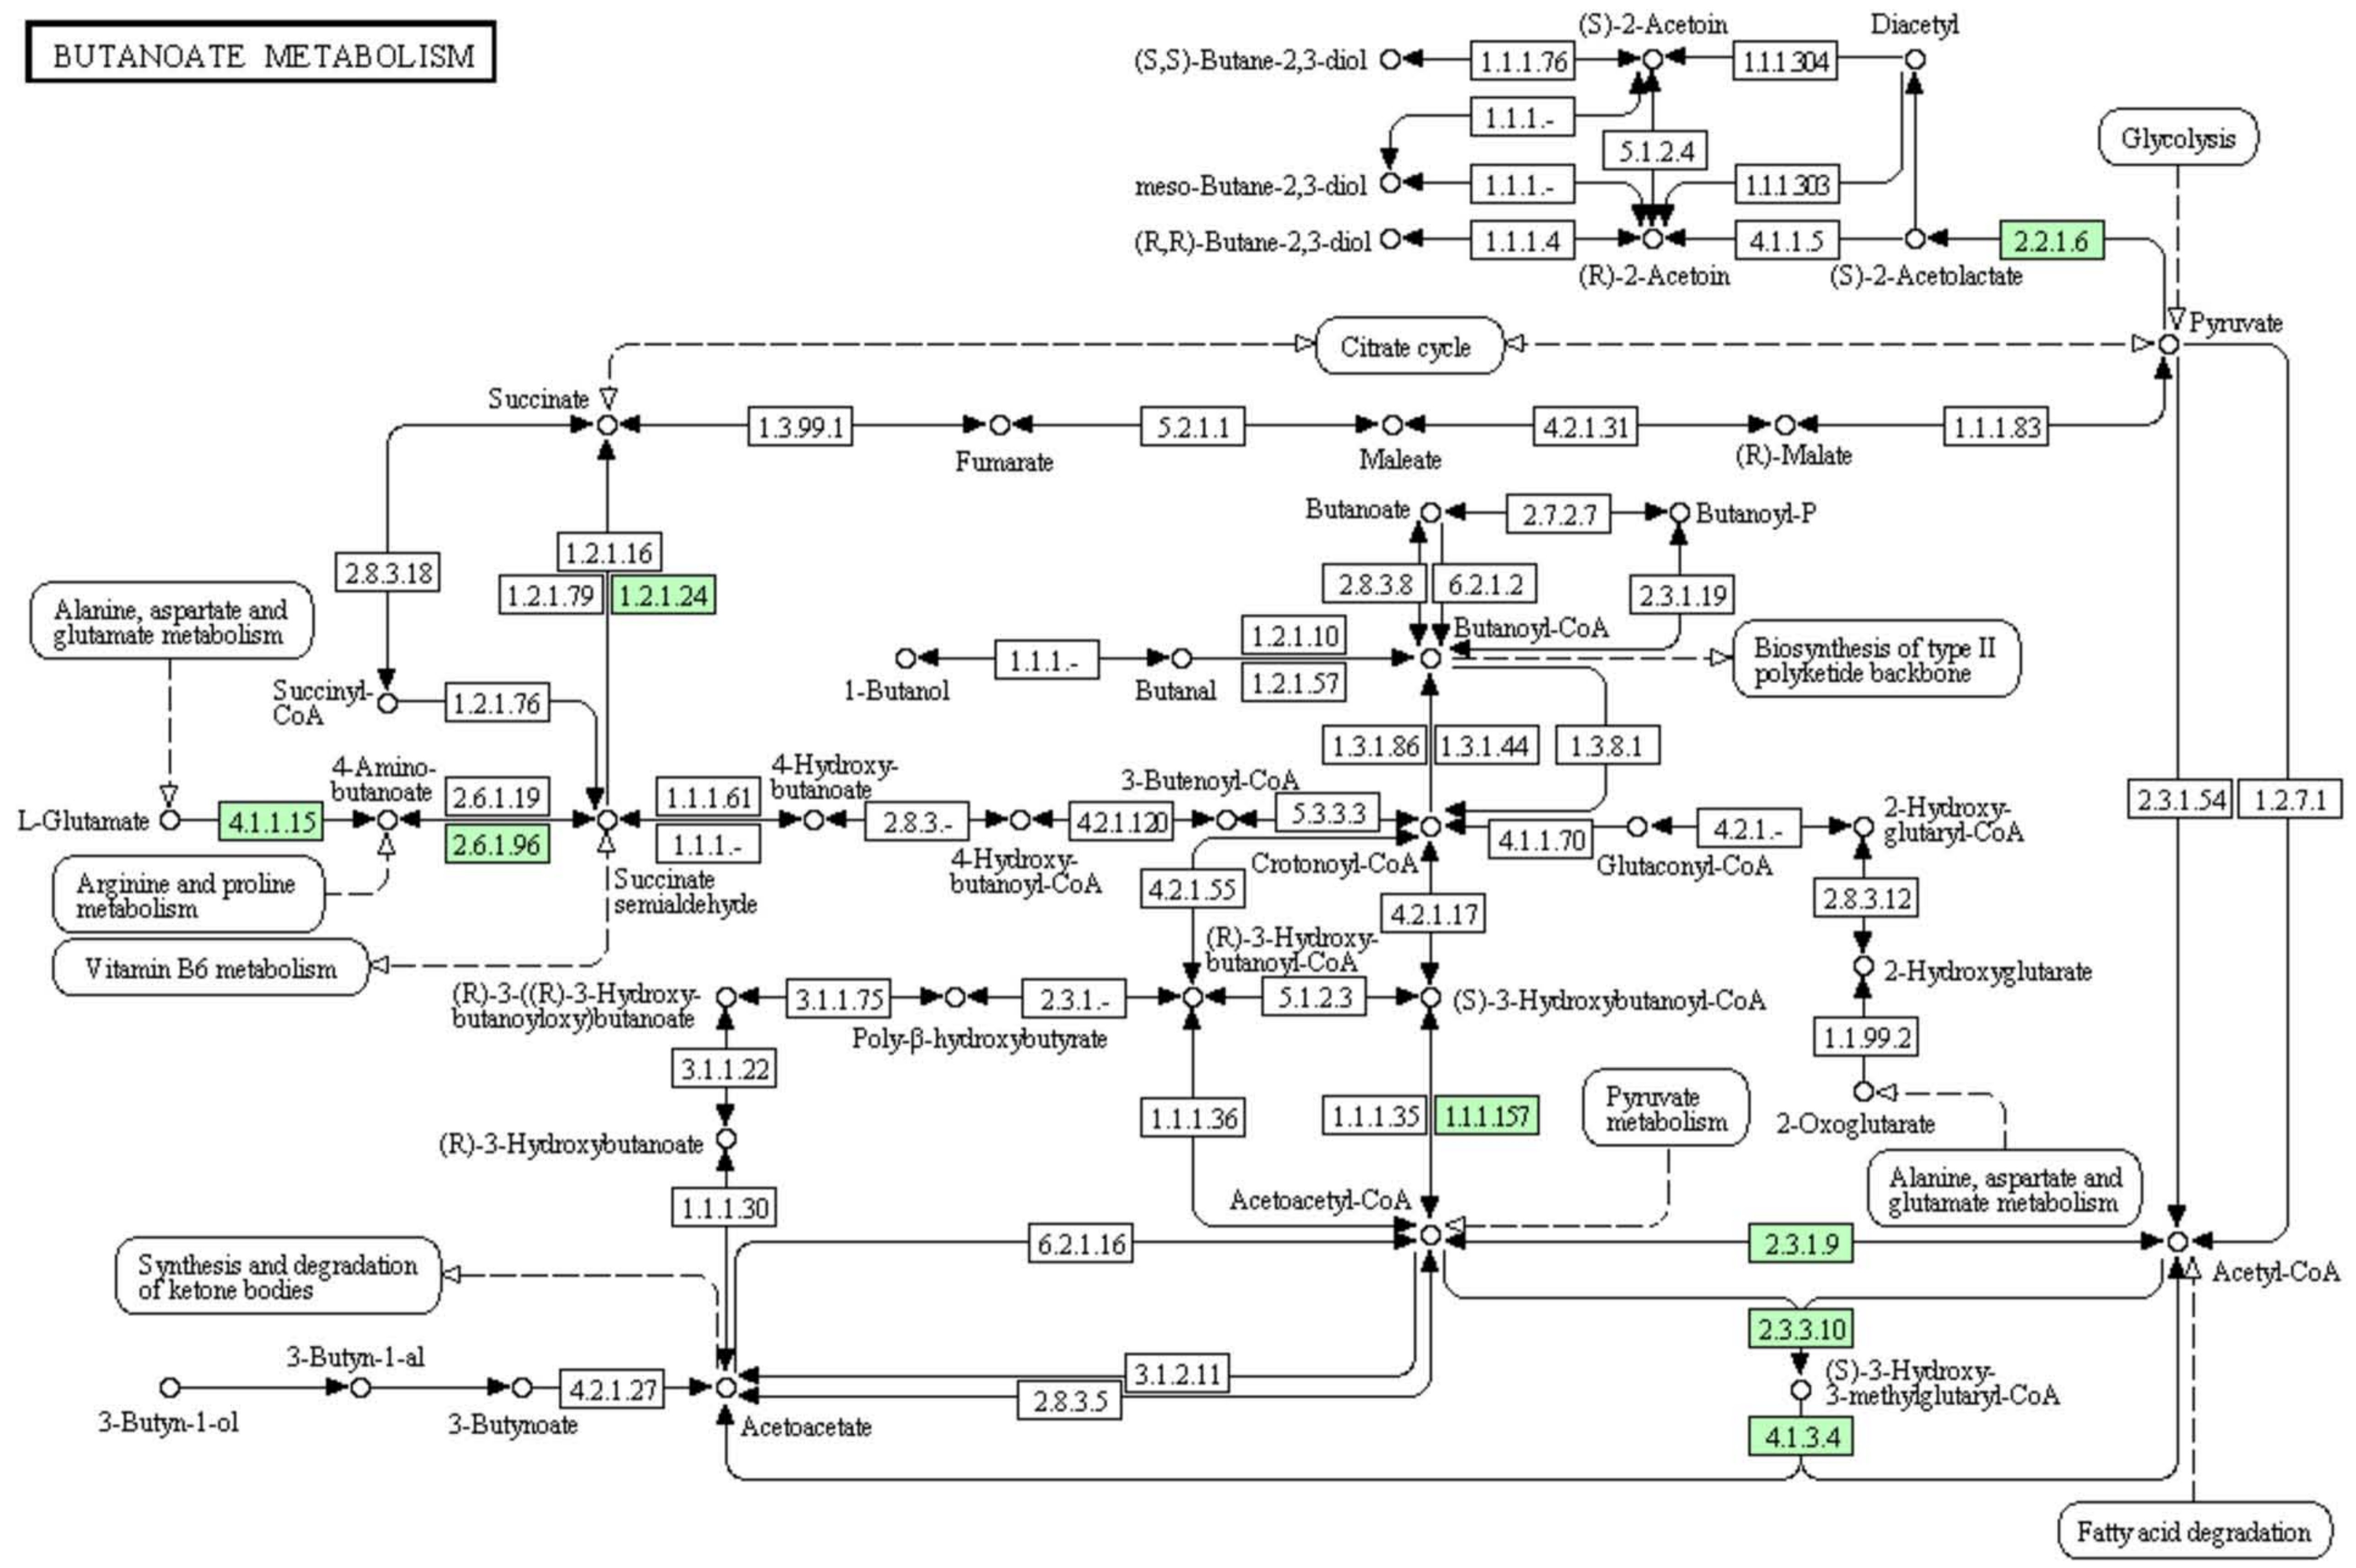











# CALCIUM SIGNALING PATHWAY

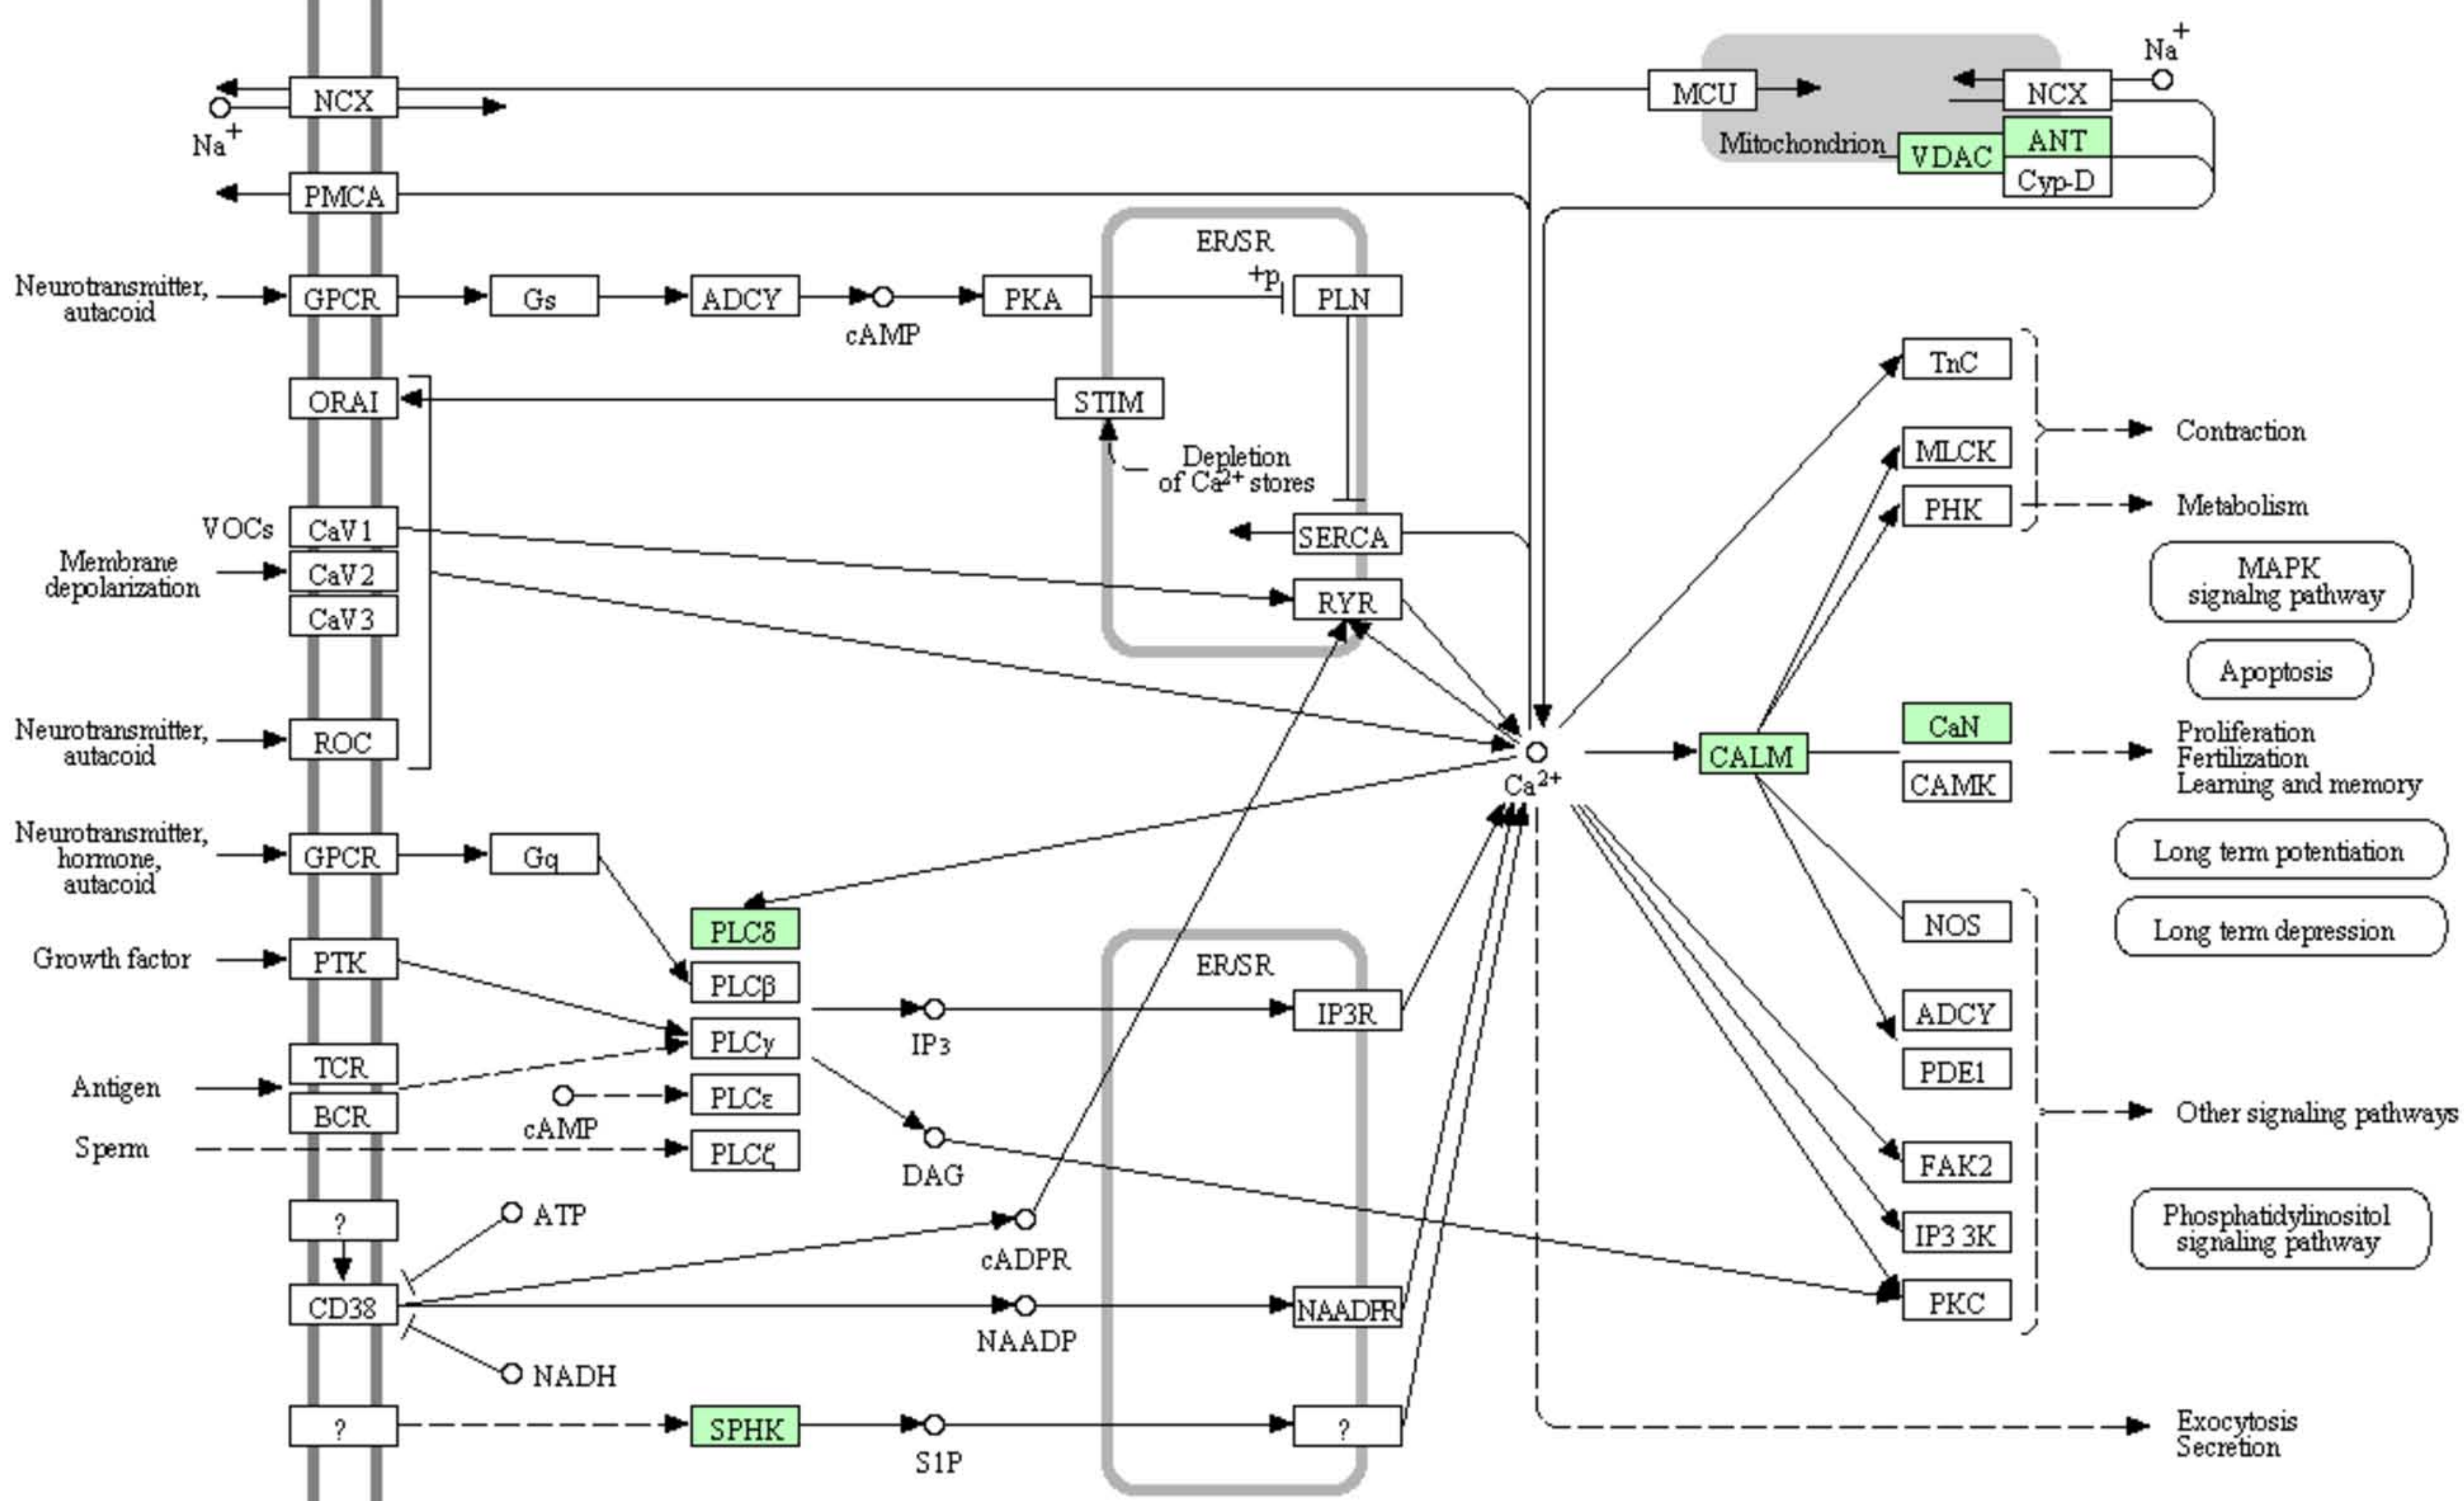



CARBON FIXATION IN PHOTOSYNTHETIC ORGANISMS

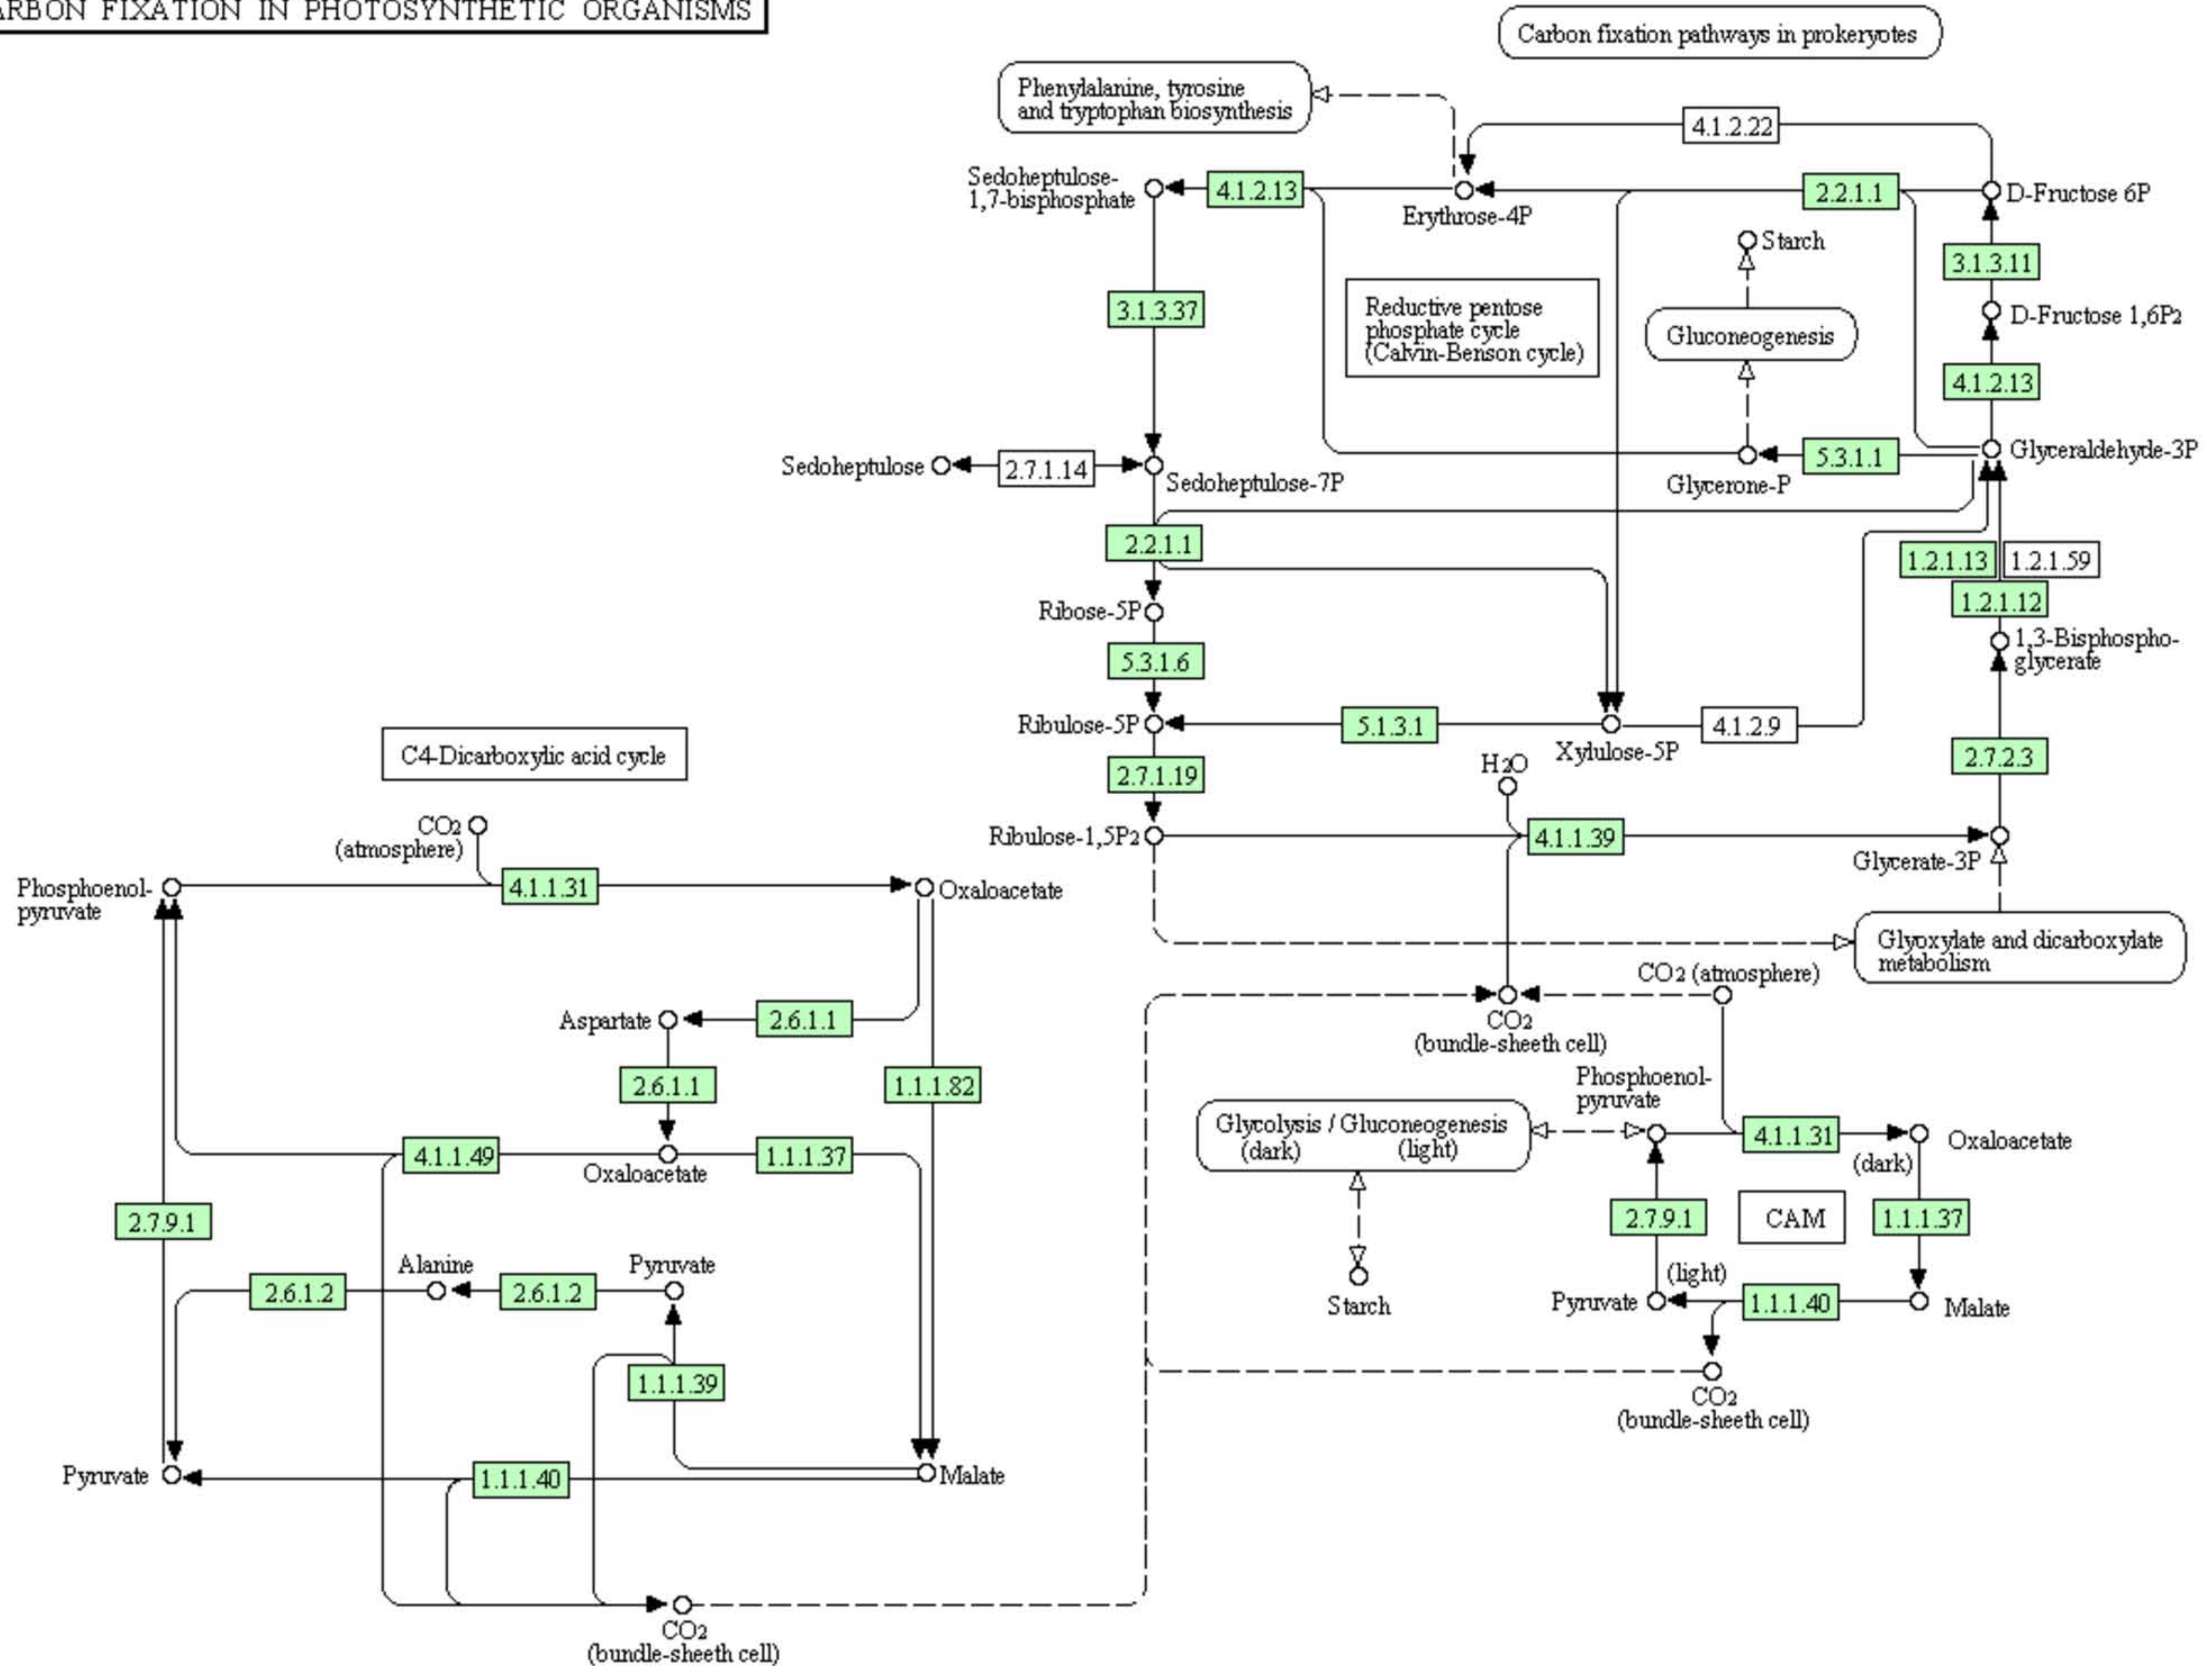



CARBON FIXATION PATHWAYS IN PROKARYOTES

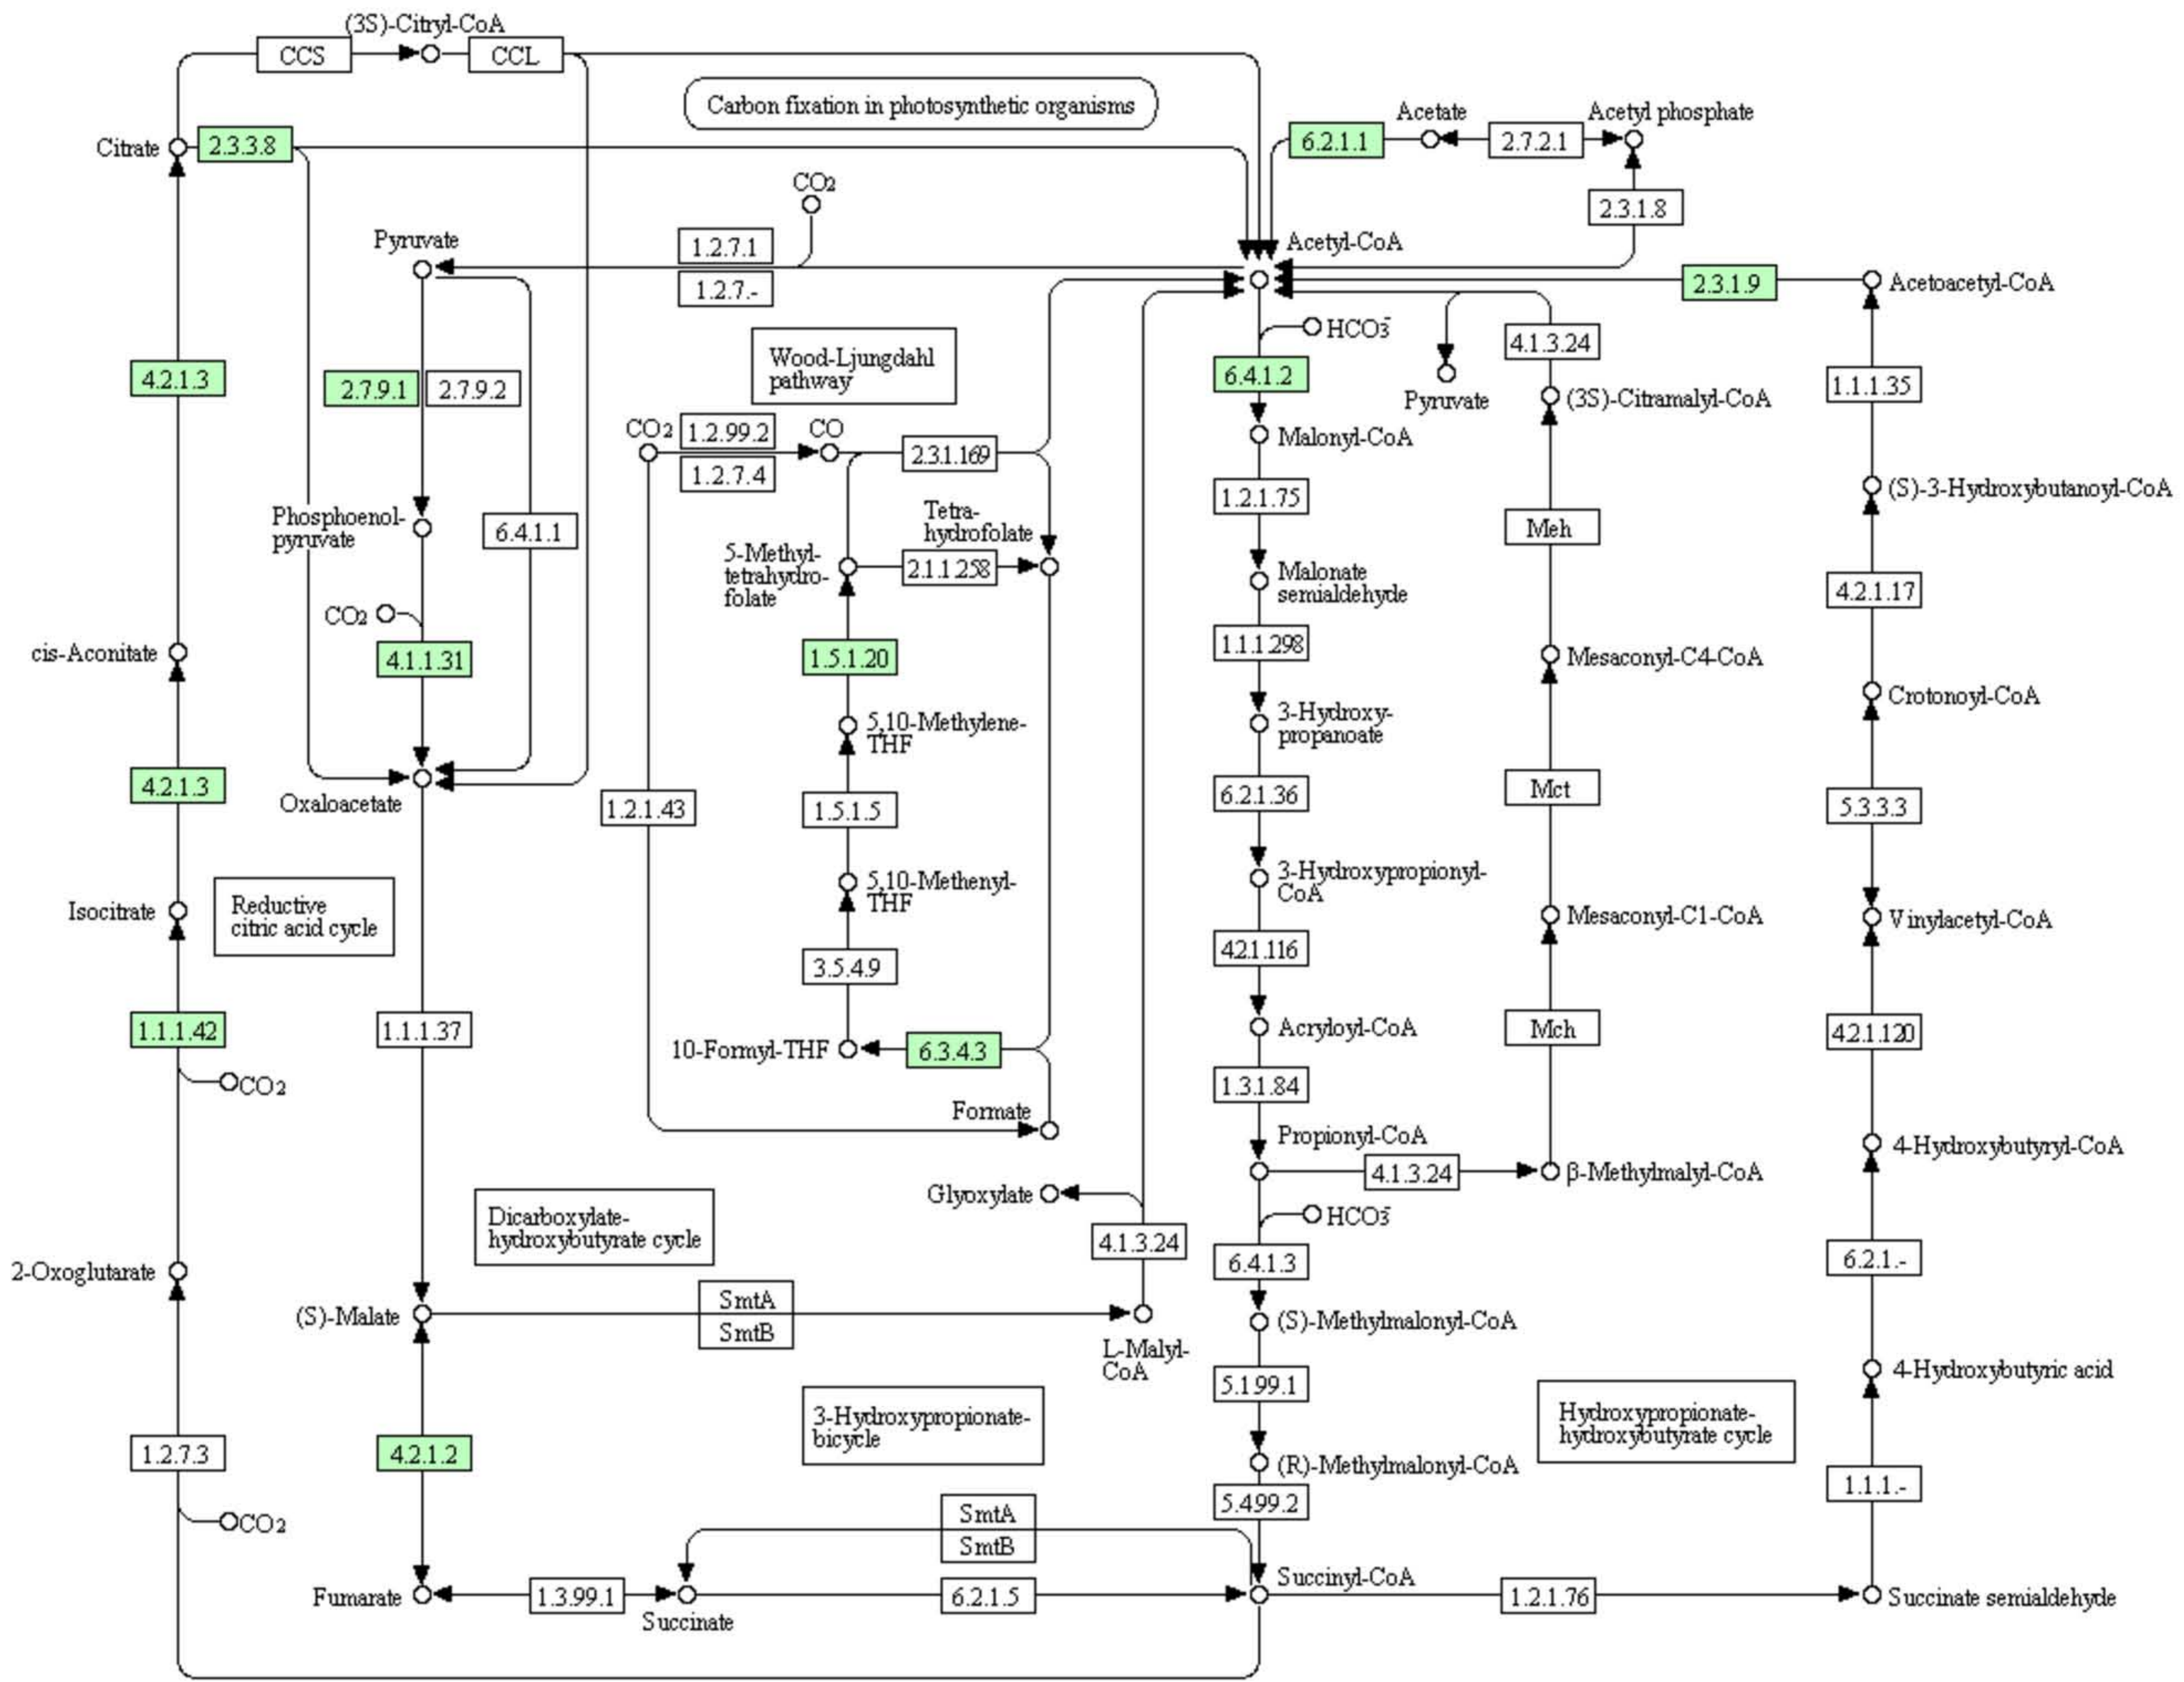



CARBON METABOLISM

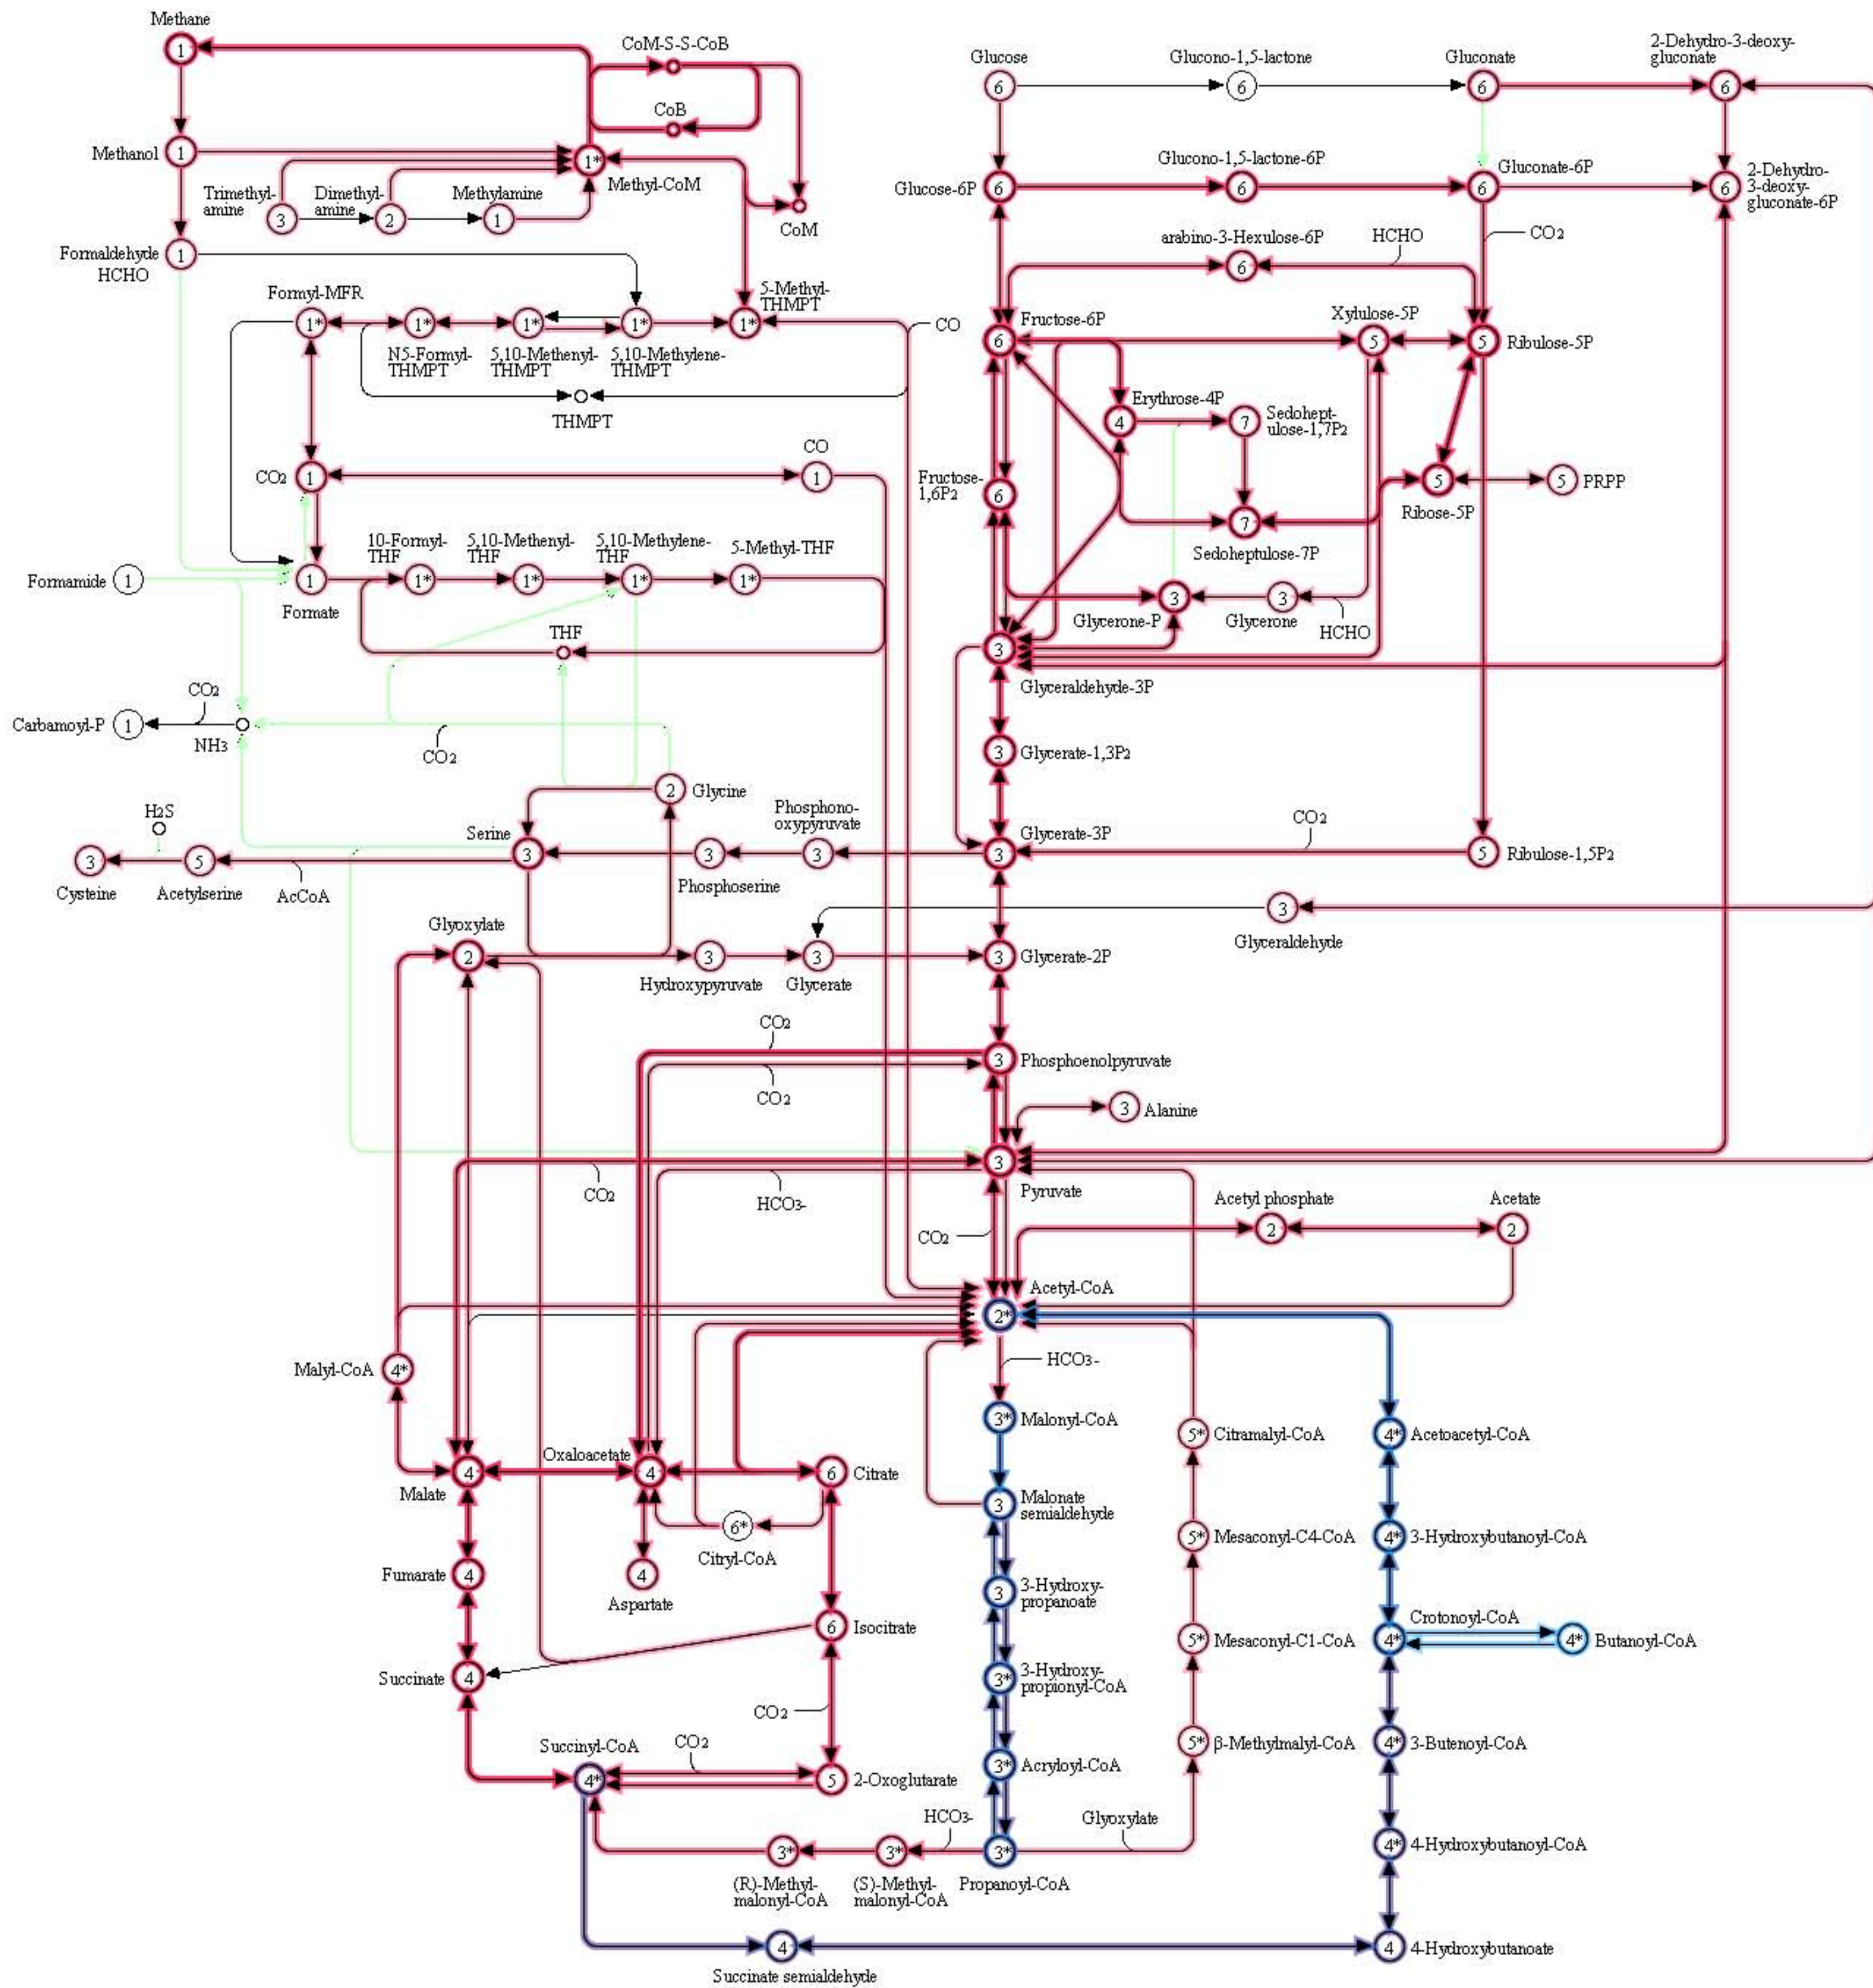







CELL CYCLE

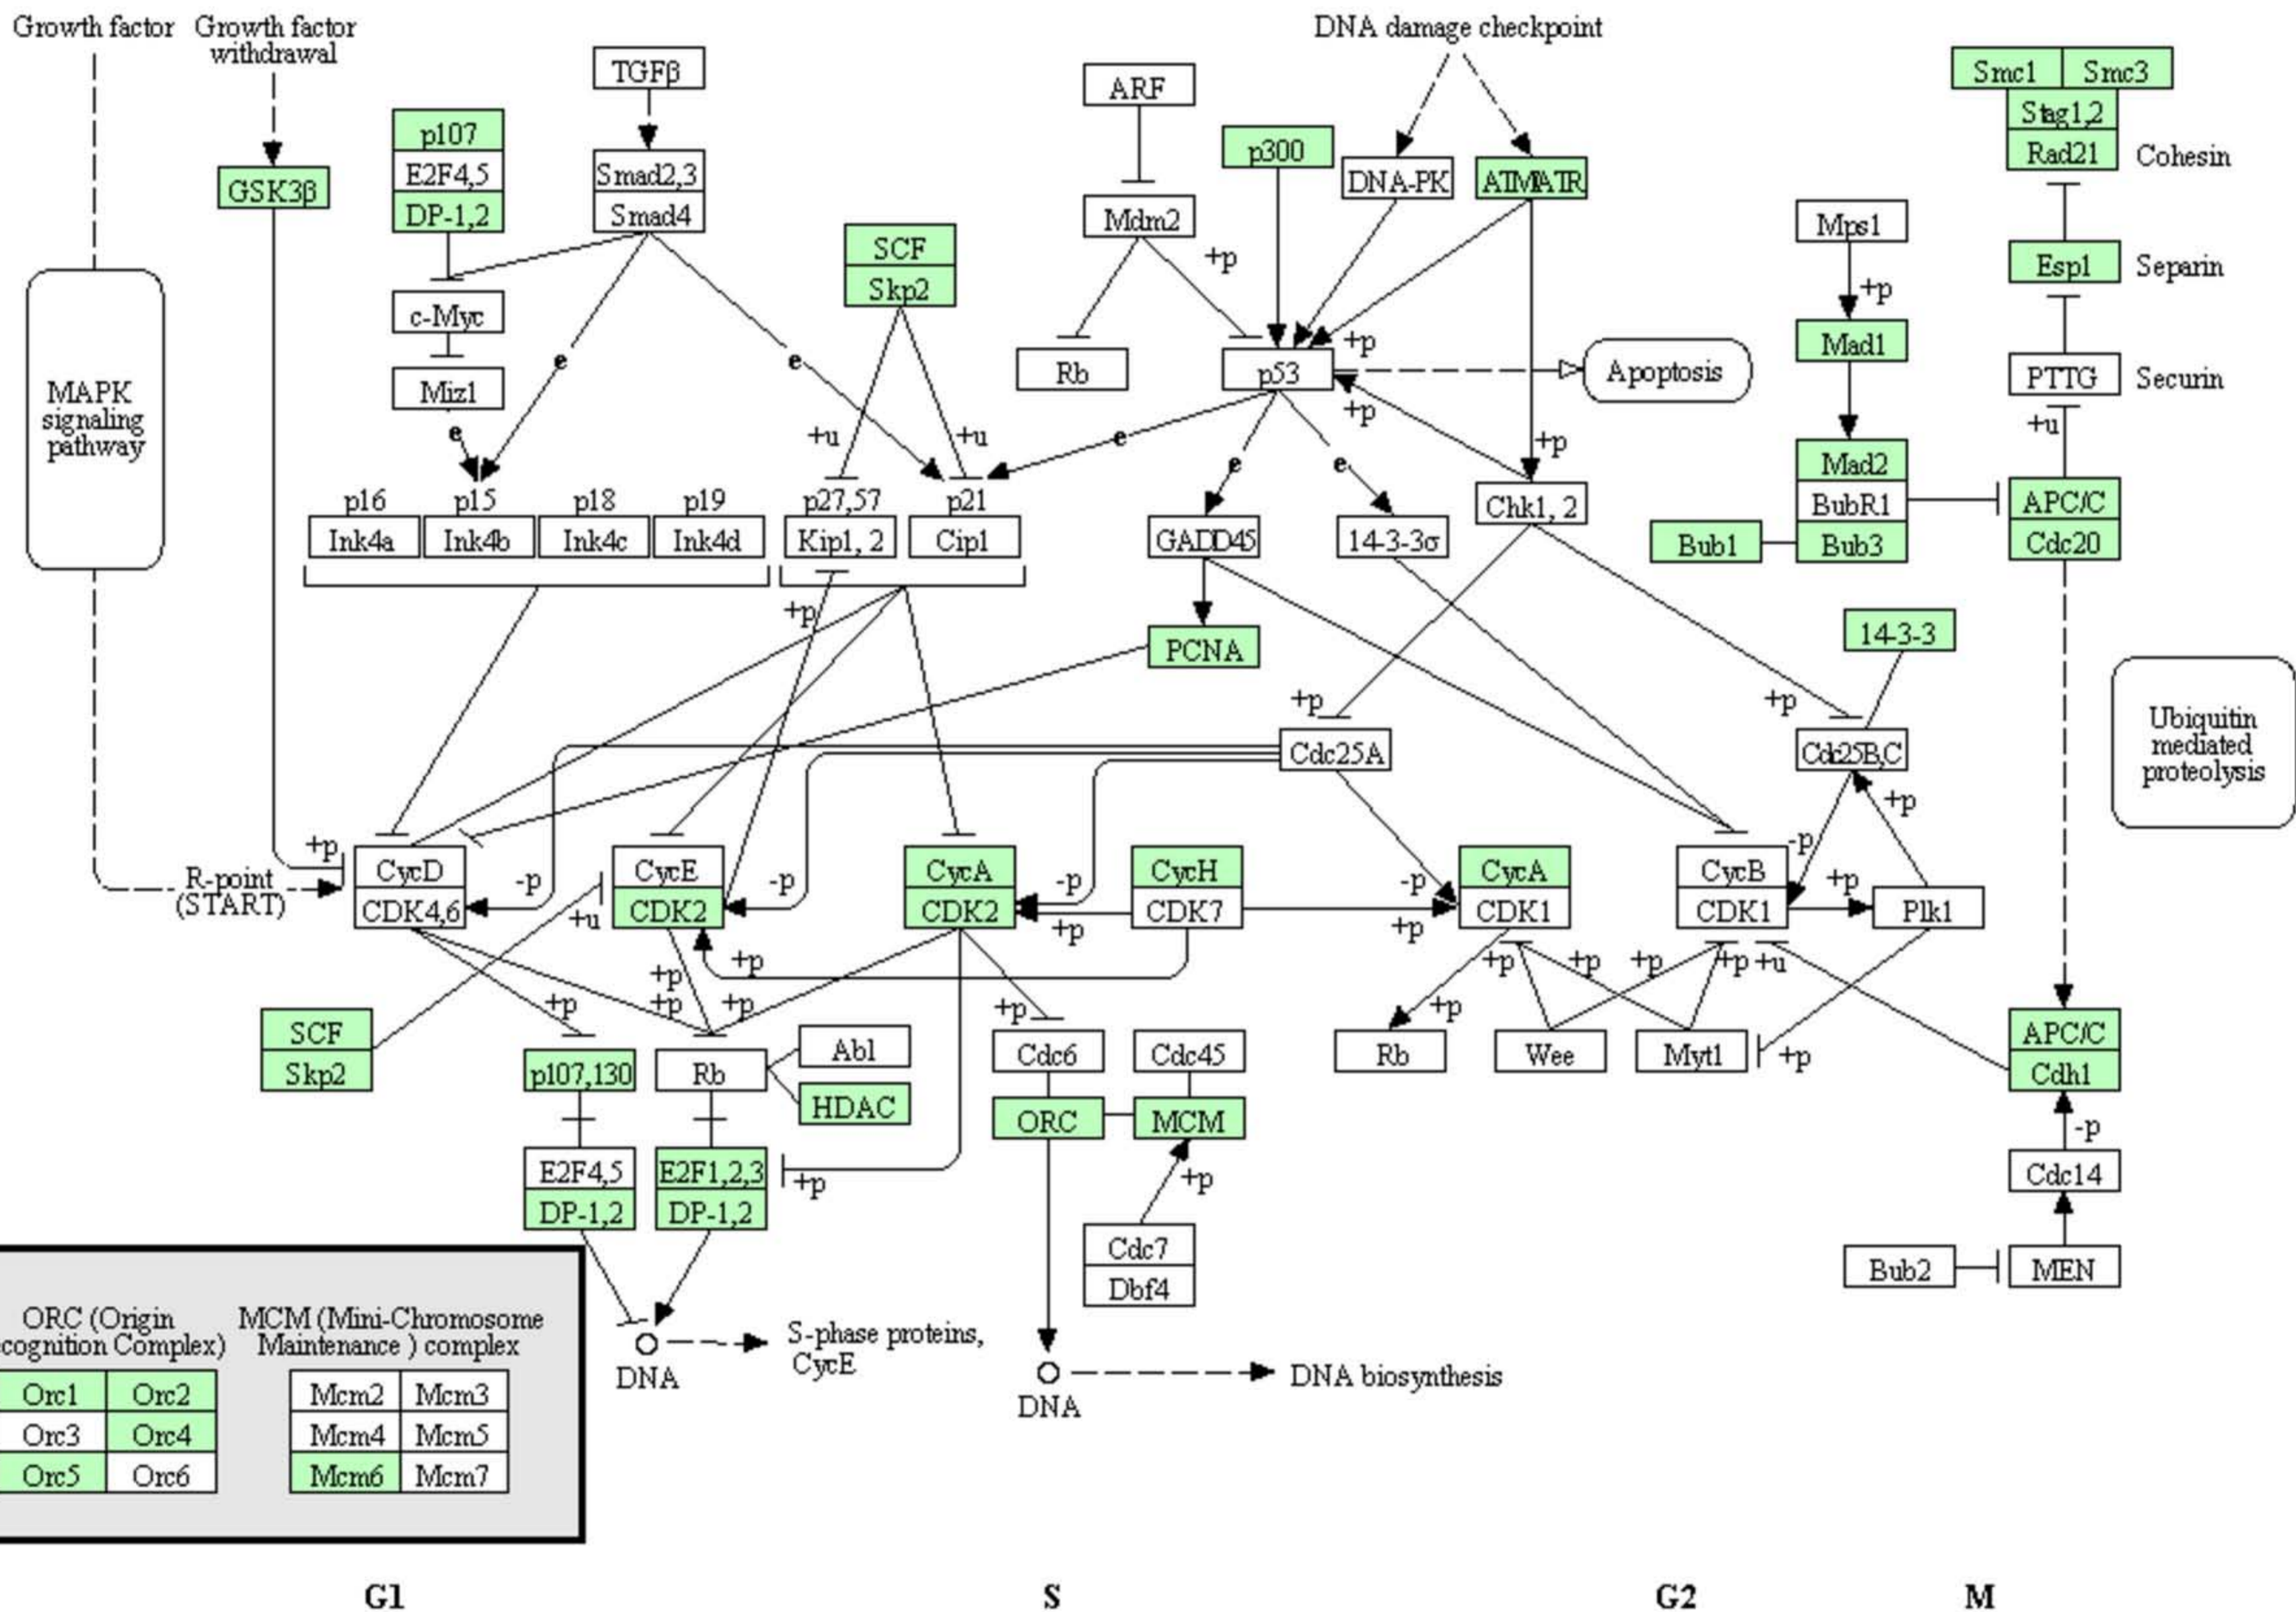



# CHLOROALKANE AND CHLOROALKENE DEGRADATION

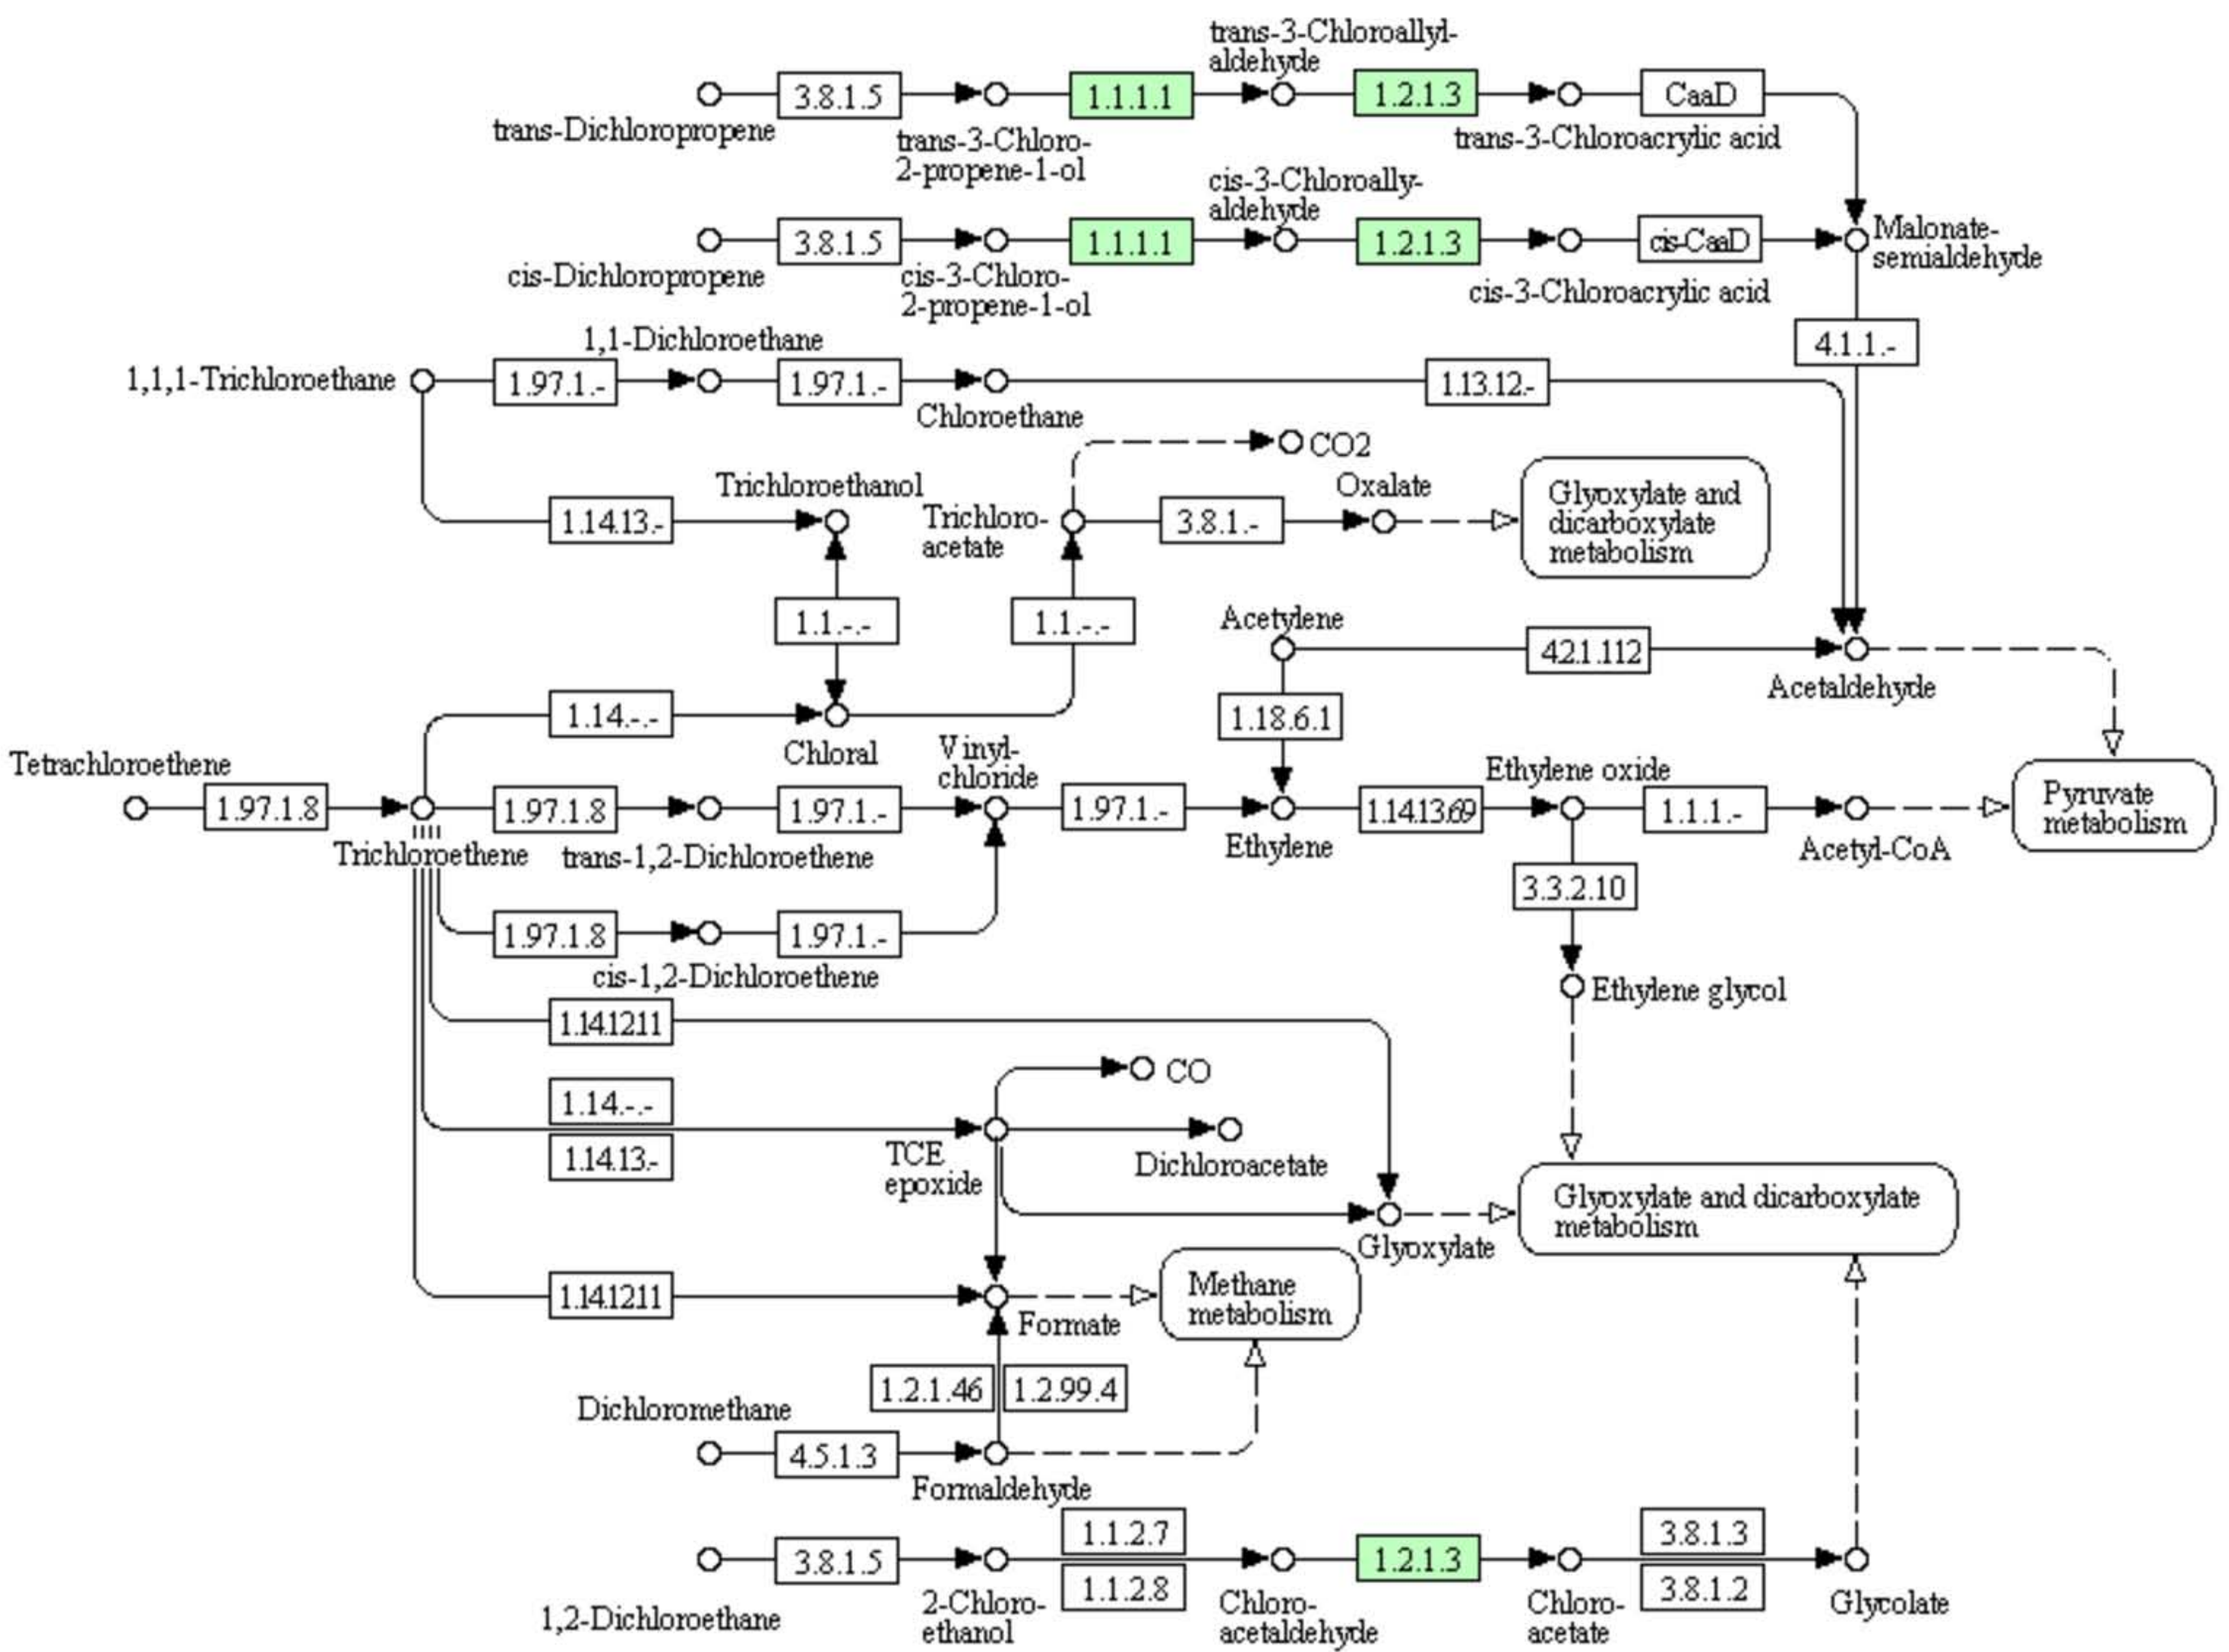



CHLOROCYCLOHEXANE AND CHLOROBENZENE DEGRADATION

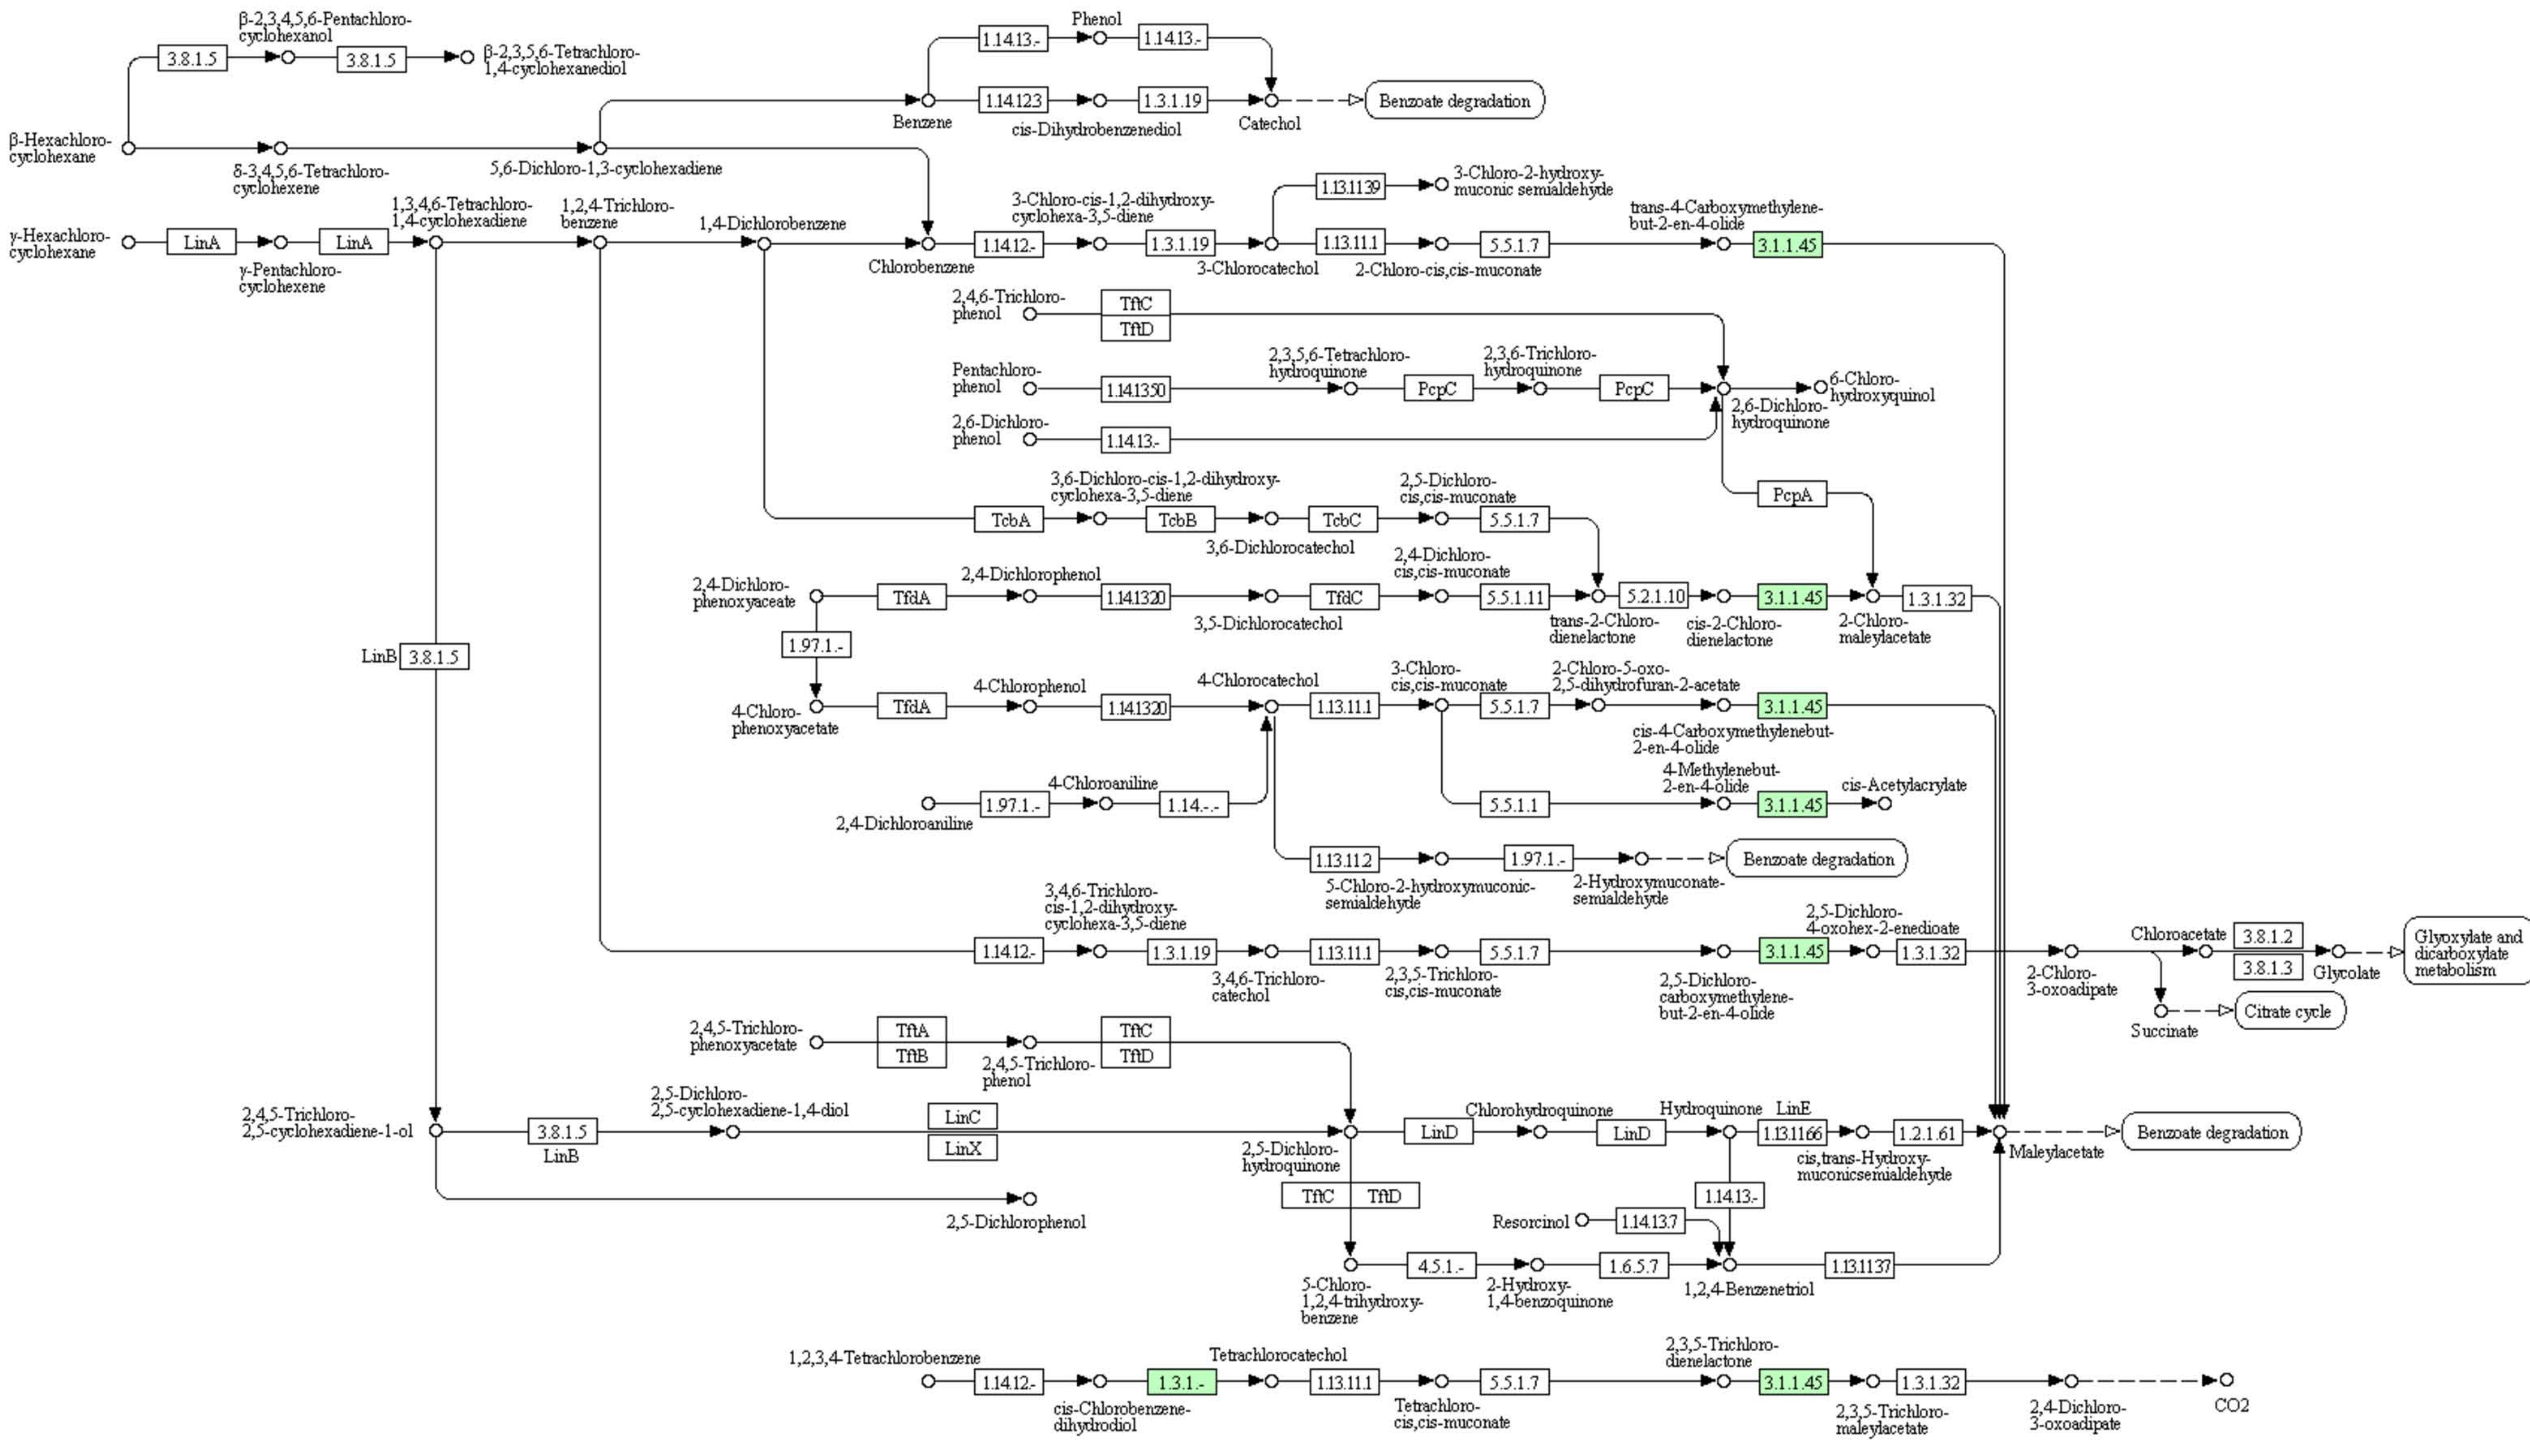



# CITRATE CYCLE (TCA CYCLE)

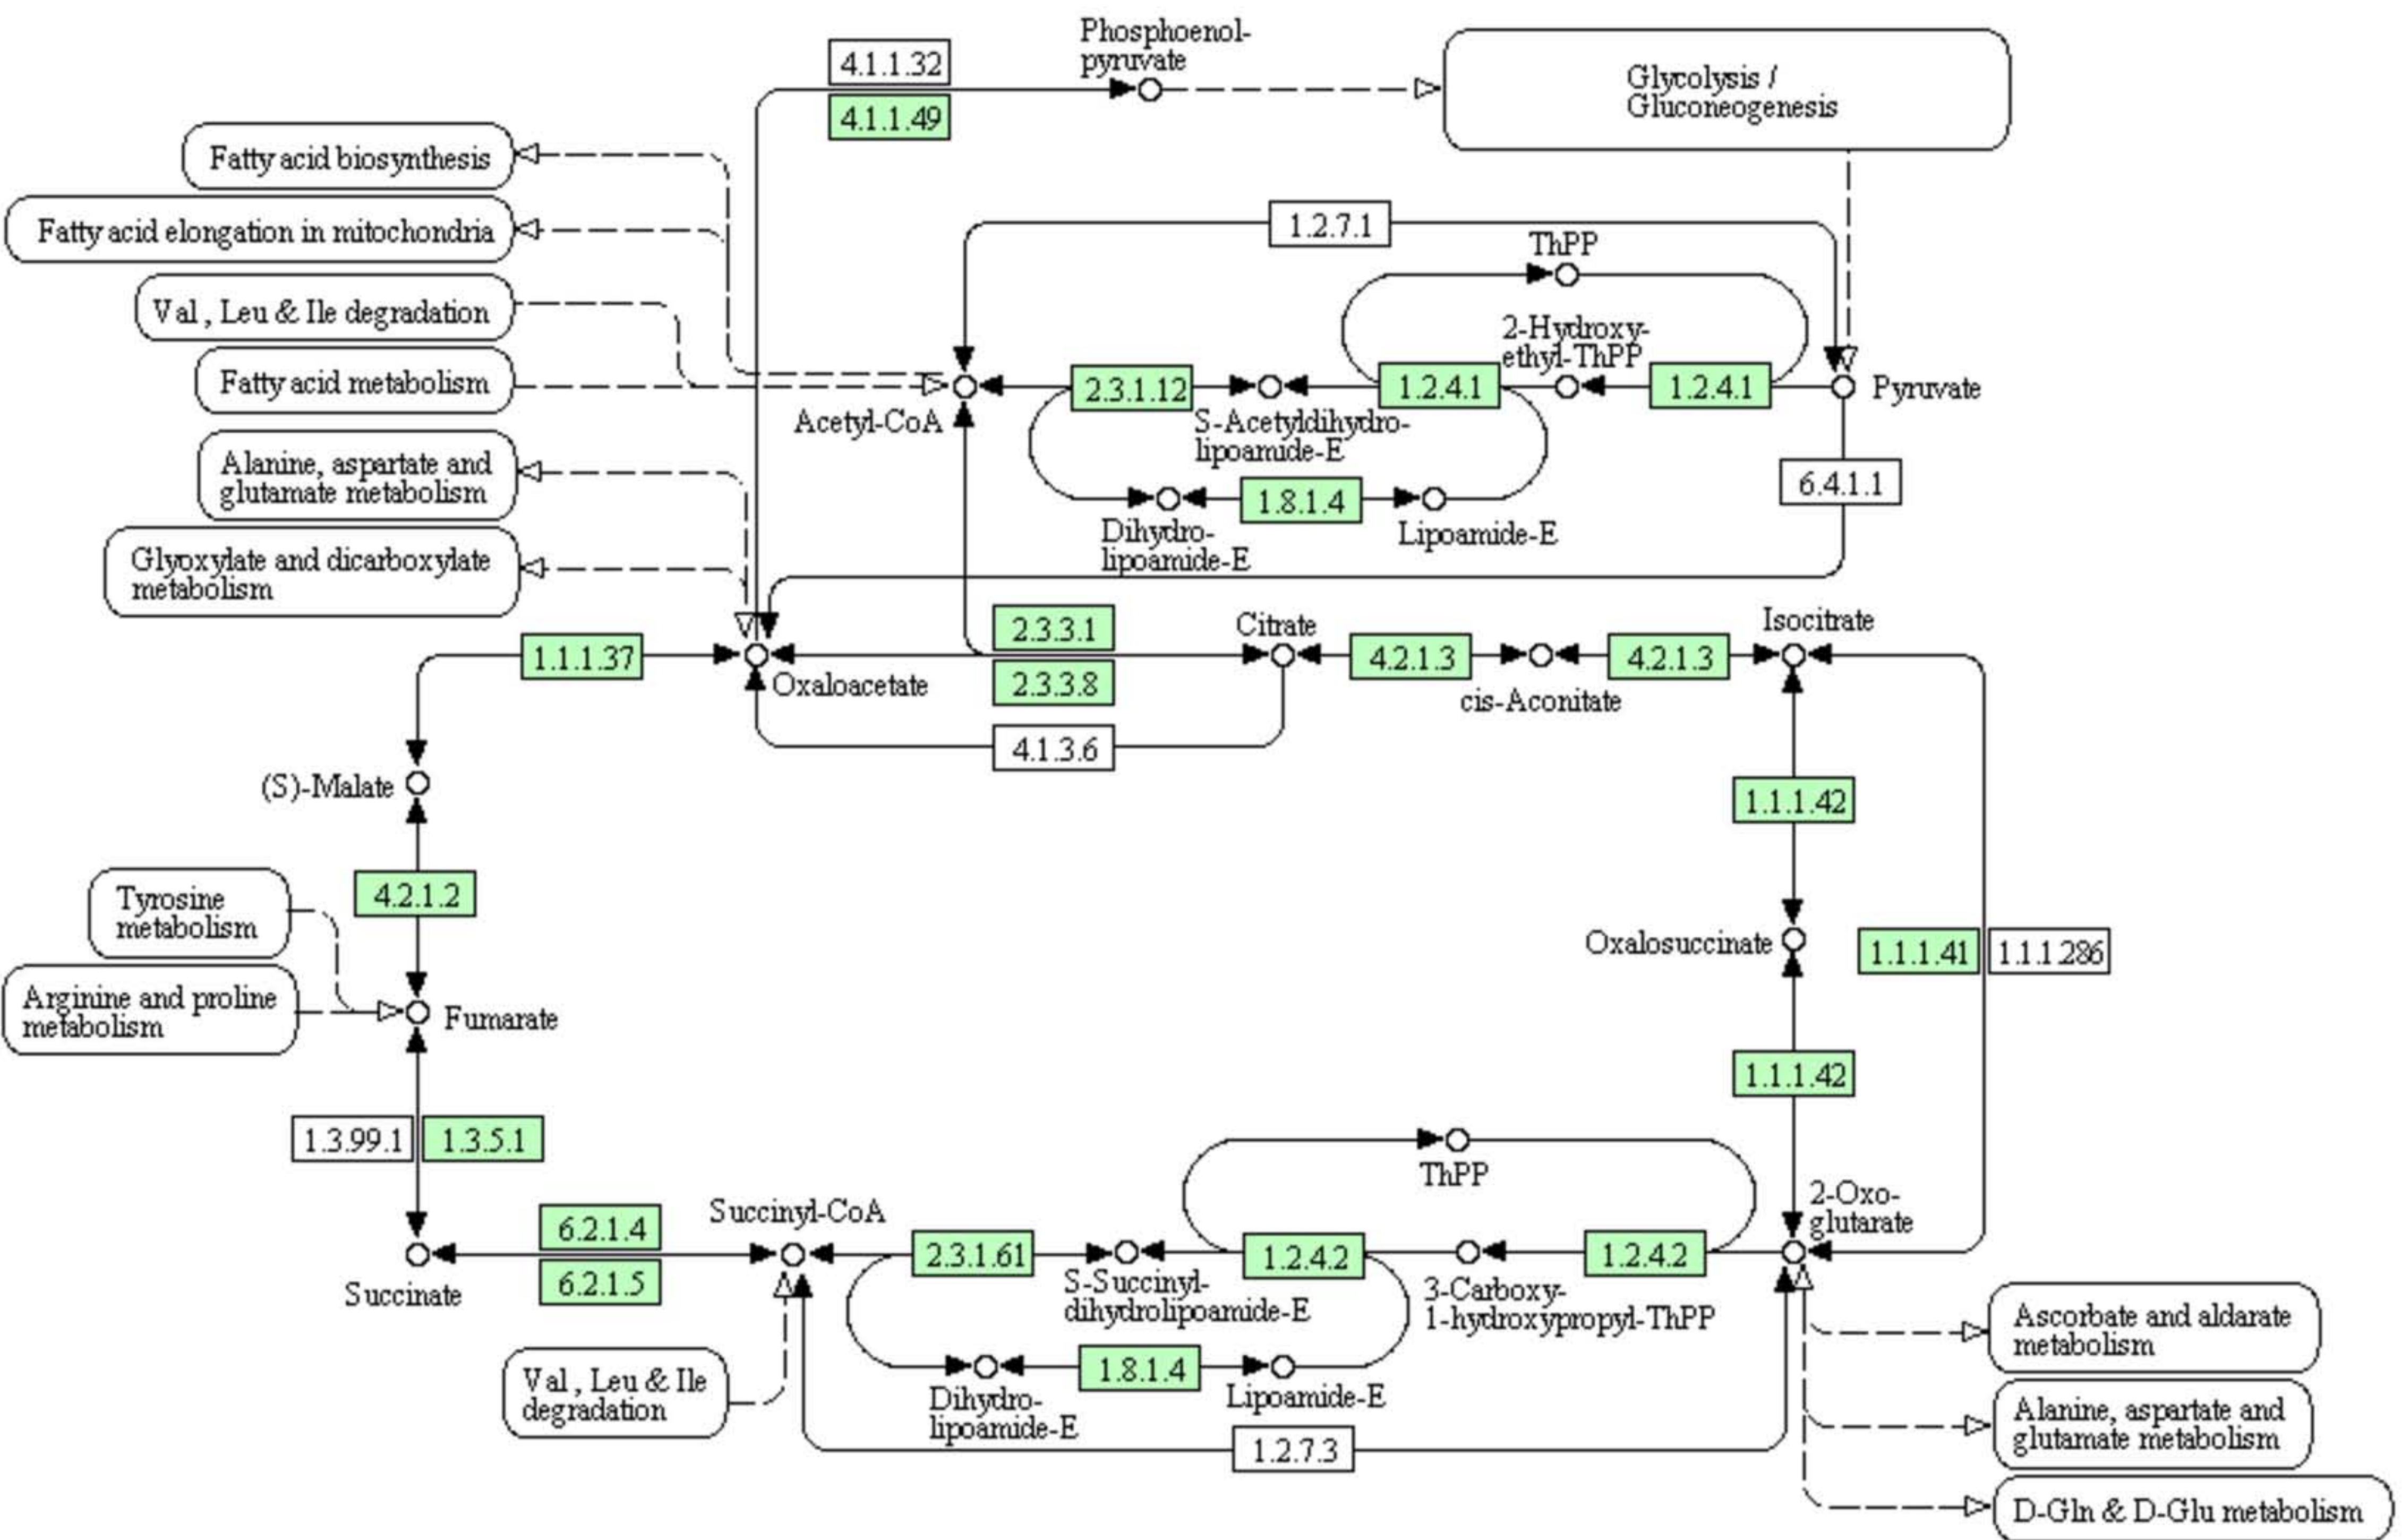



CUTIN, SUBERINE AND WAX BIOSYNTHESIS

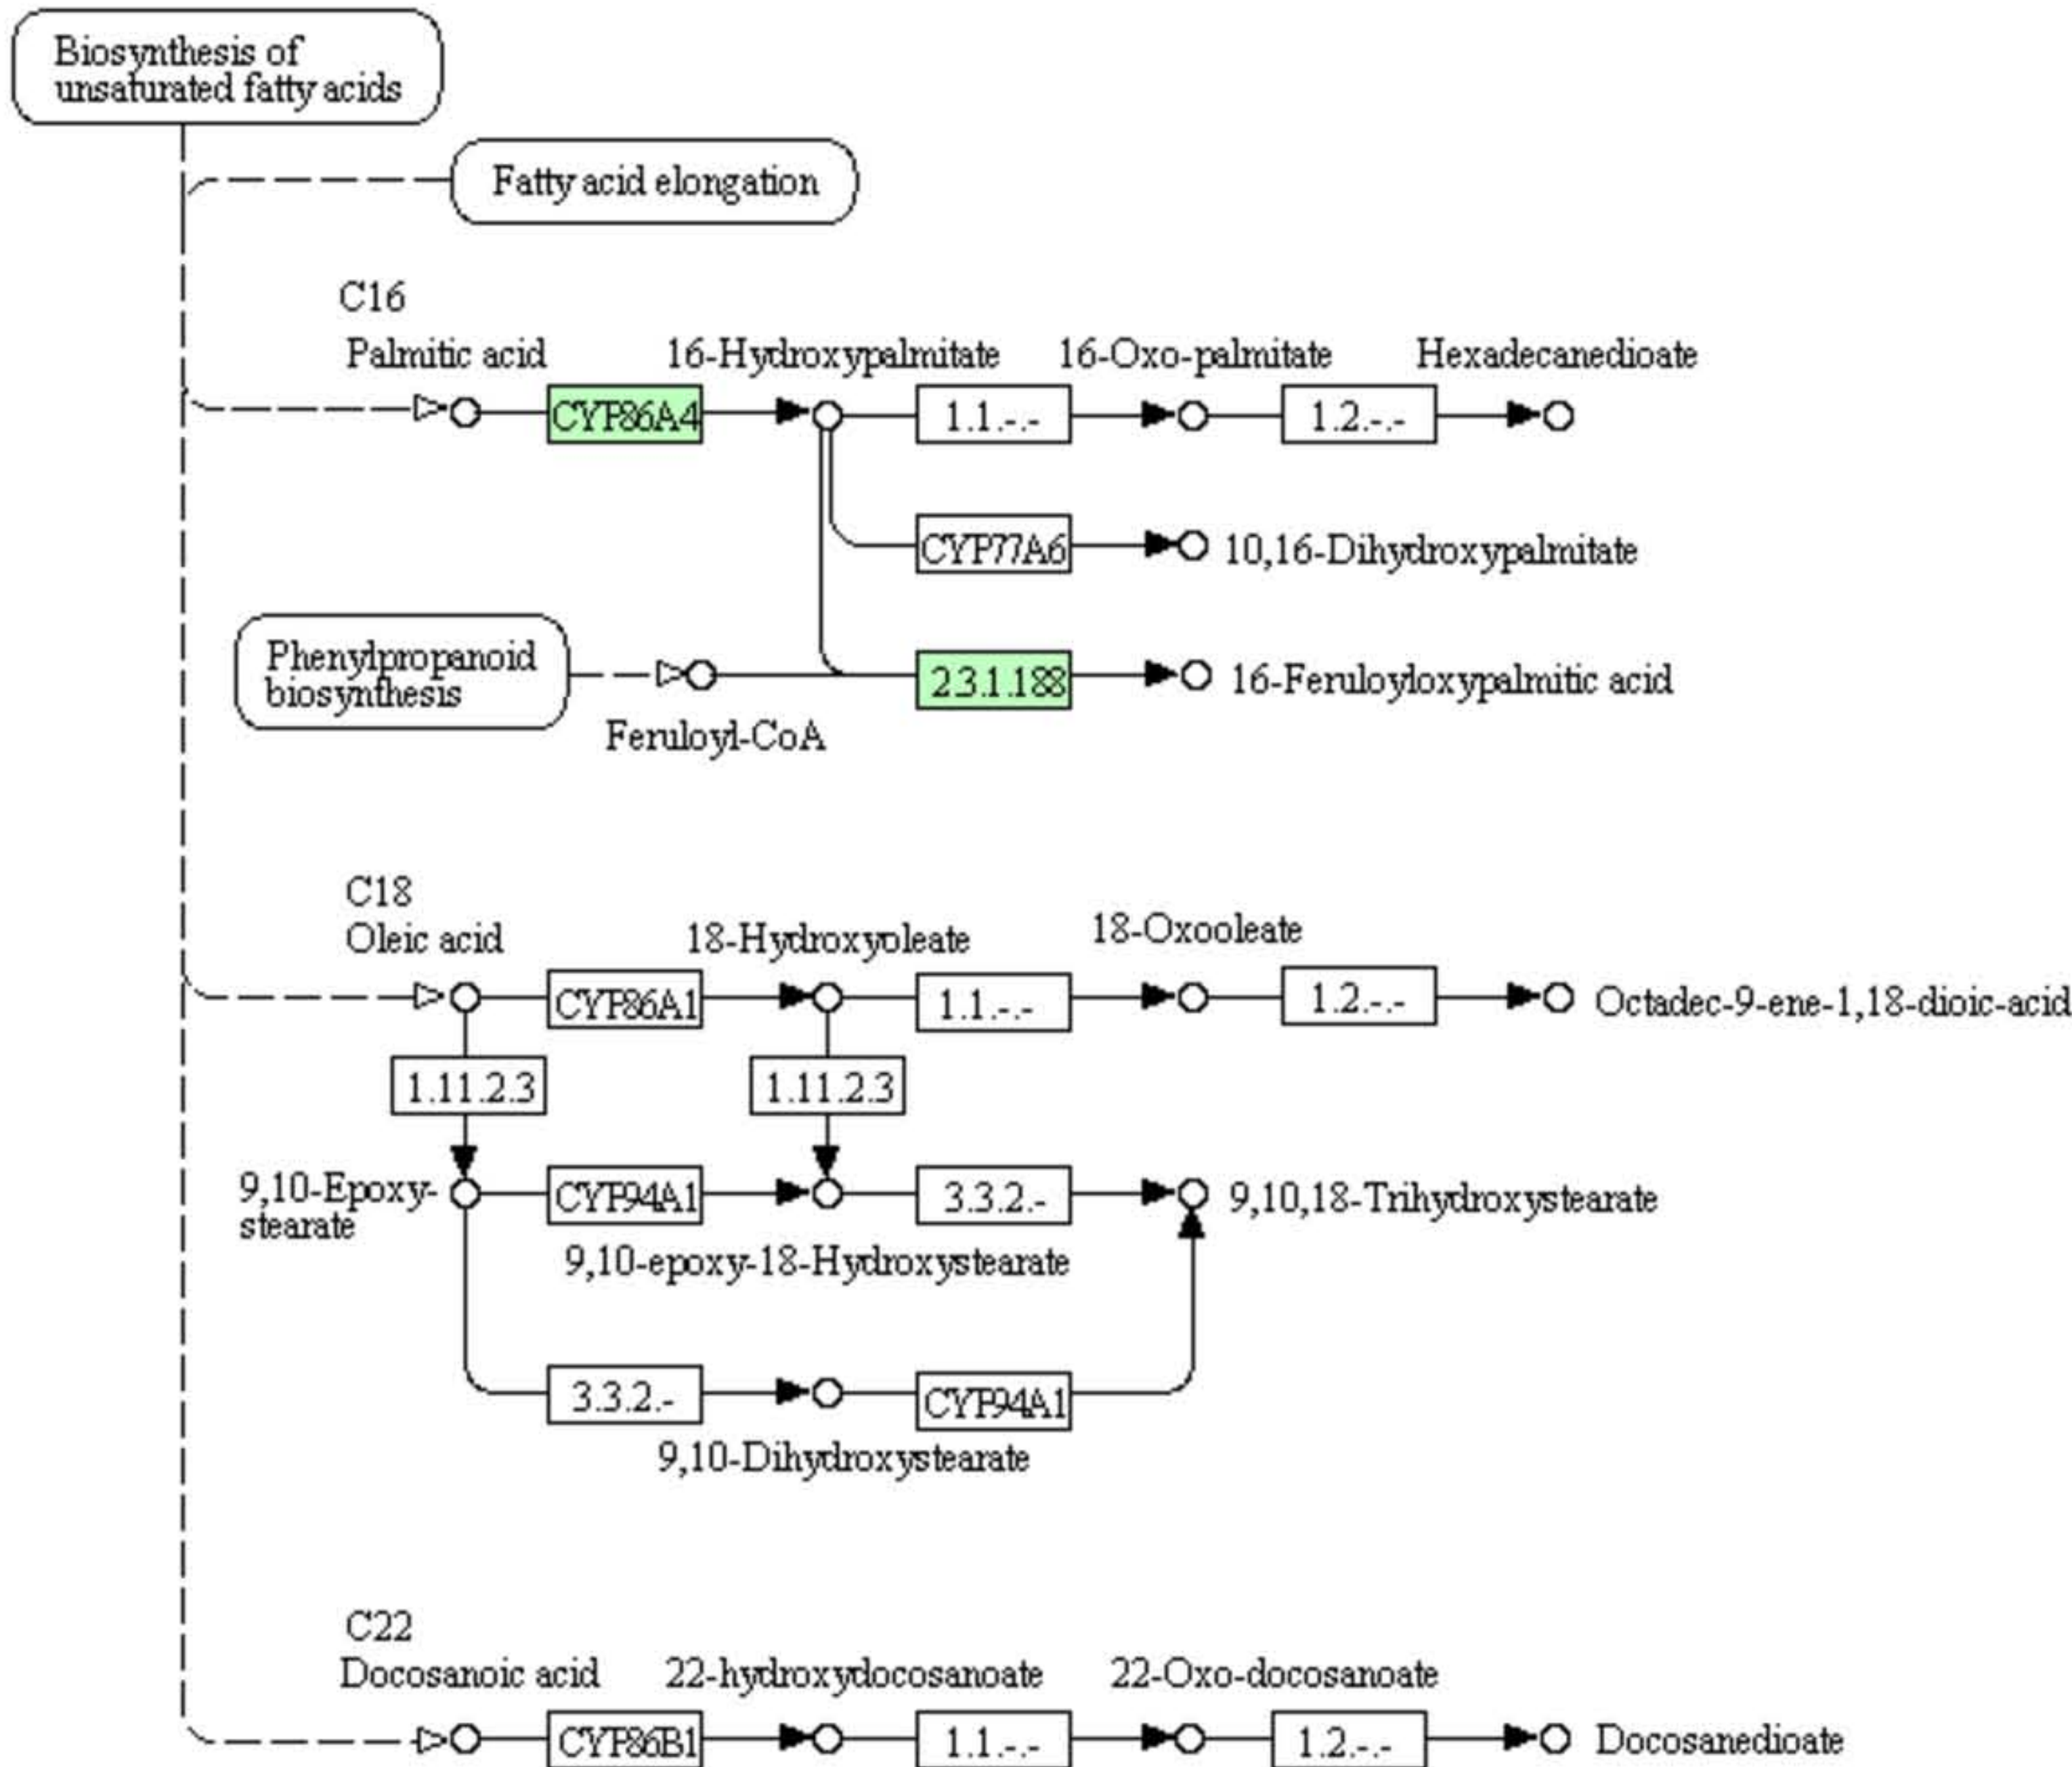

Structure of common cutin and suberin monomers

|                                                               |                                            |
|---------------------------------------------------------------|--------------------------------------------|
| Unsubstituted fatty acids                                     | <chem>CCCCCCCCCCCCCCCCCC(=O)O</chem>       |
| $\omega$ -Hydroxy fatty acids                                 | <chem>CCCCCCCCCCCCCCCCCC(O)C(=O)O</chem>   |
| $\alpha,\omega$ -Dicarboxylic acids                           | <chem>CCCCCCCCCCCCCCCCCC(=O)O</chem>       |
| Mid-chain functionalized monomers                             | <chem>CCCCCCCCC1OC1CCCCCCCCCC(=O)O</chem>  |
| Epoxy-fatty acids                                             | <chem>CCCCCCCCC1OC1CCCCCCCCCC(=O)O</chem>  |
| Polyhydroxy-fatty acids                                       | <chem>CCCC(O)CCCC(O)CCCCCCCCCC(=O)O</chem> |
| Polyhydroxy $\alpha,\omega$ -dicarboxylic acids               | <chem>CCCC(O)CCCC(O)CCCCCCCCCC(=O)O</chem> |
| Fatty alcohols                                                | <chem>CCCCCCCCCCCCCCCCCCO</chem>           |
| Alkan-1-ols and alken-1-ols                                   | <chem>CCCCCCCCCCCCCCCCCCO</chem>           |
| $\alpha,\omega$ -Alkanediols and $\alpha,\omega$ -alkenediols | <chem>CCCC(O)CCCC(O)CCCCCCCCCCO</chem>     |
| Glycerol                                                      | <chem>OCC(O)CO</chem>                      |
| Phenolics                                                     | <chem>COc1ccc(O)cc1/C=C/C(=O)O</chem>      |

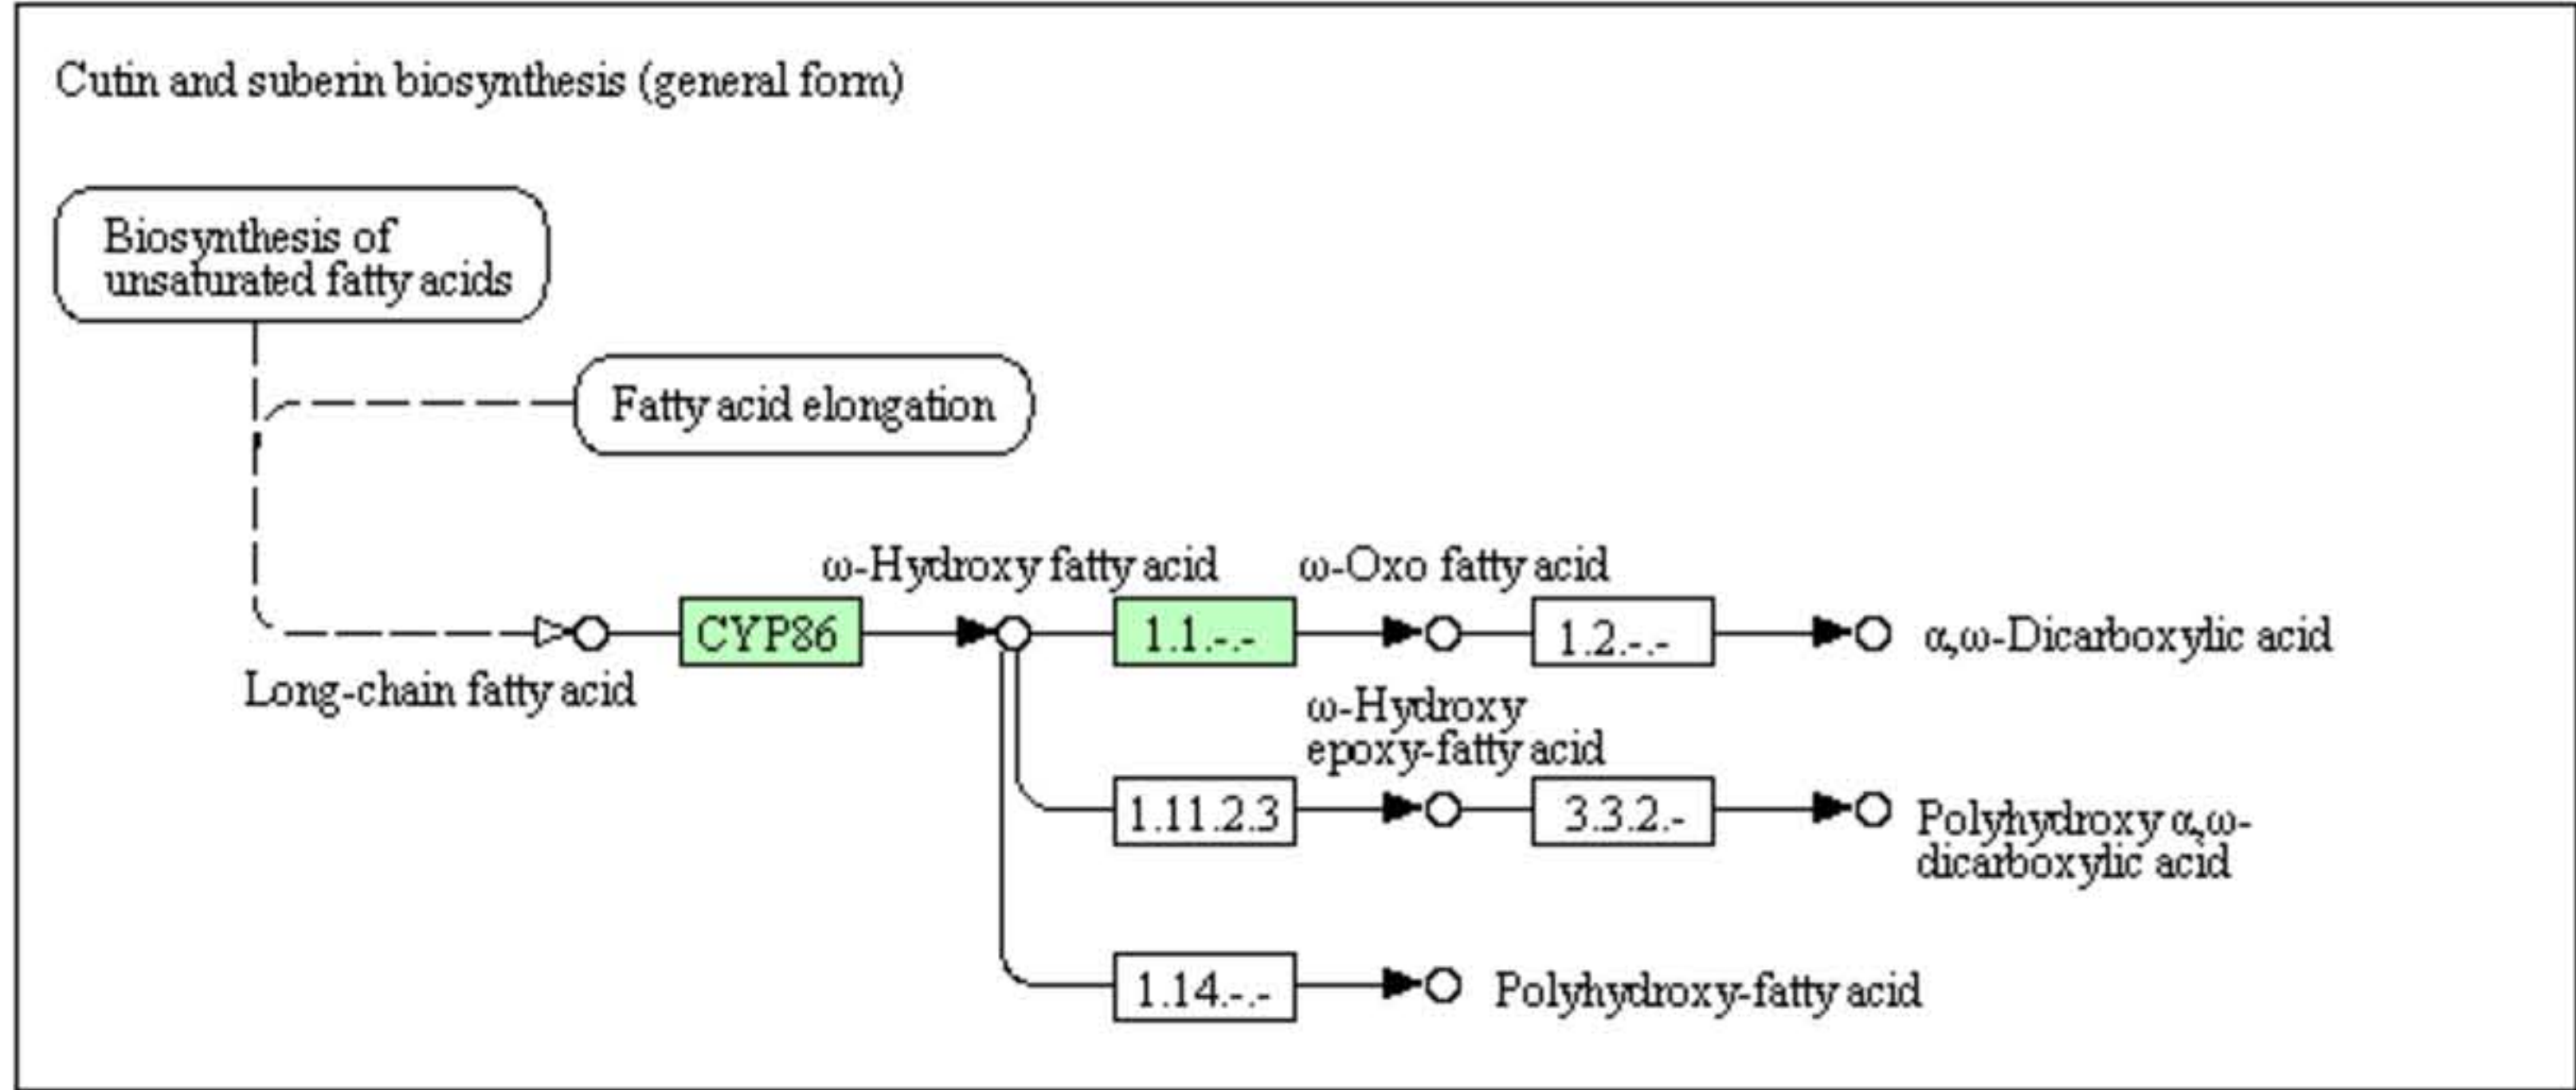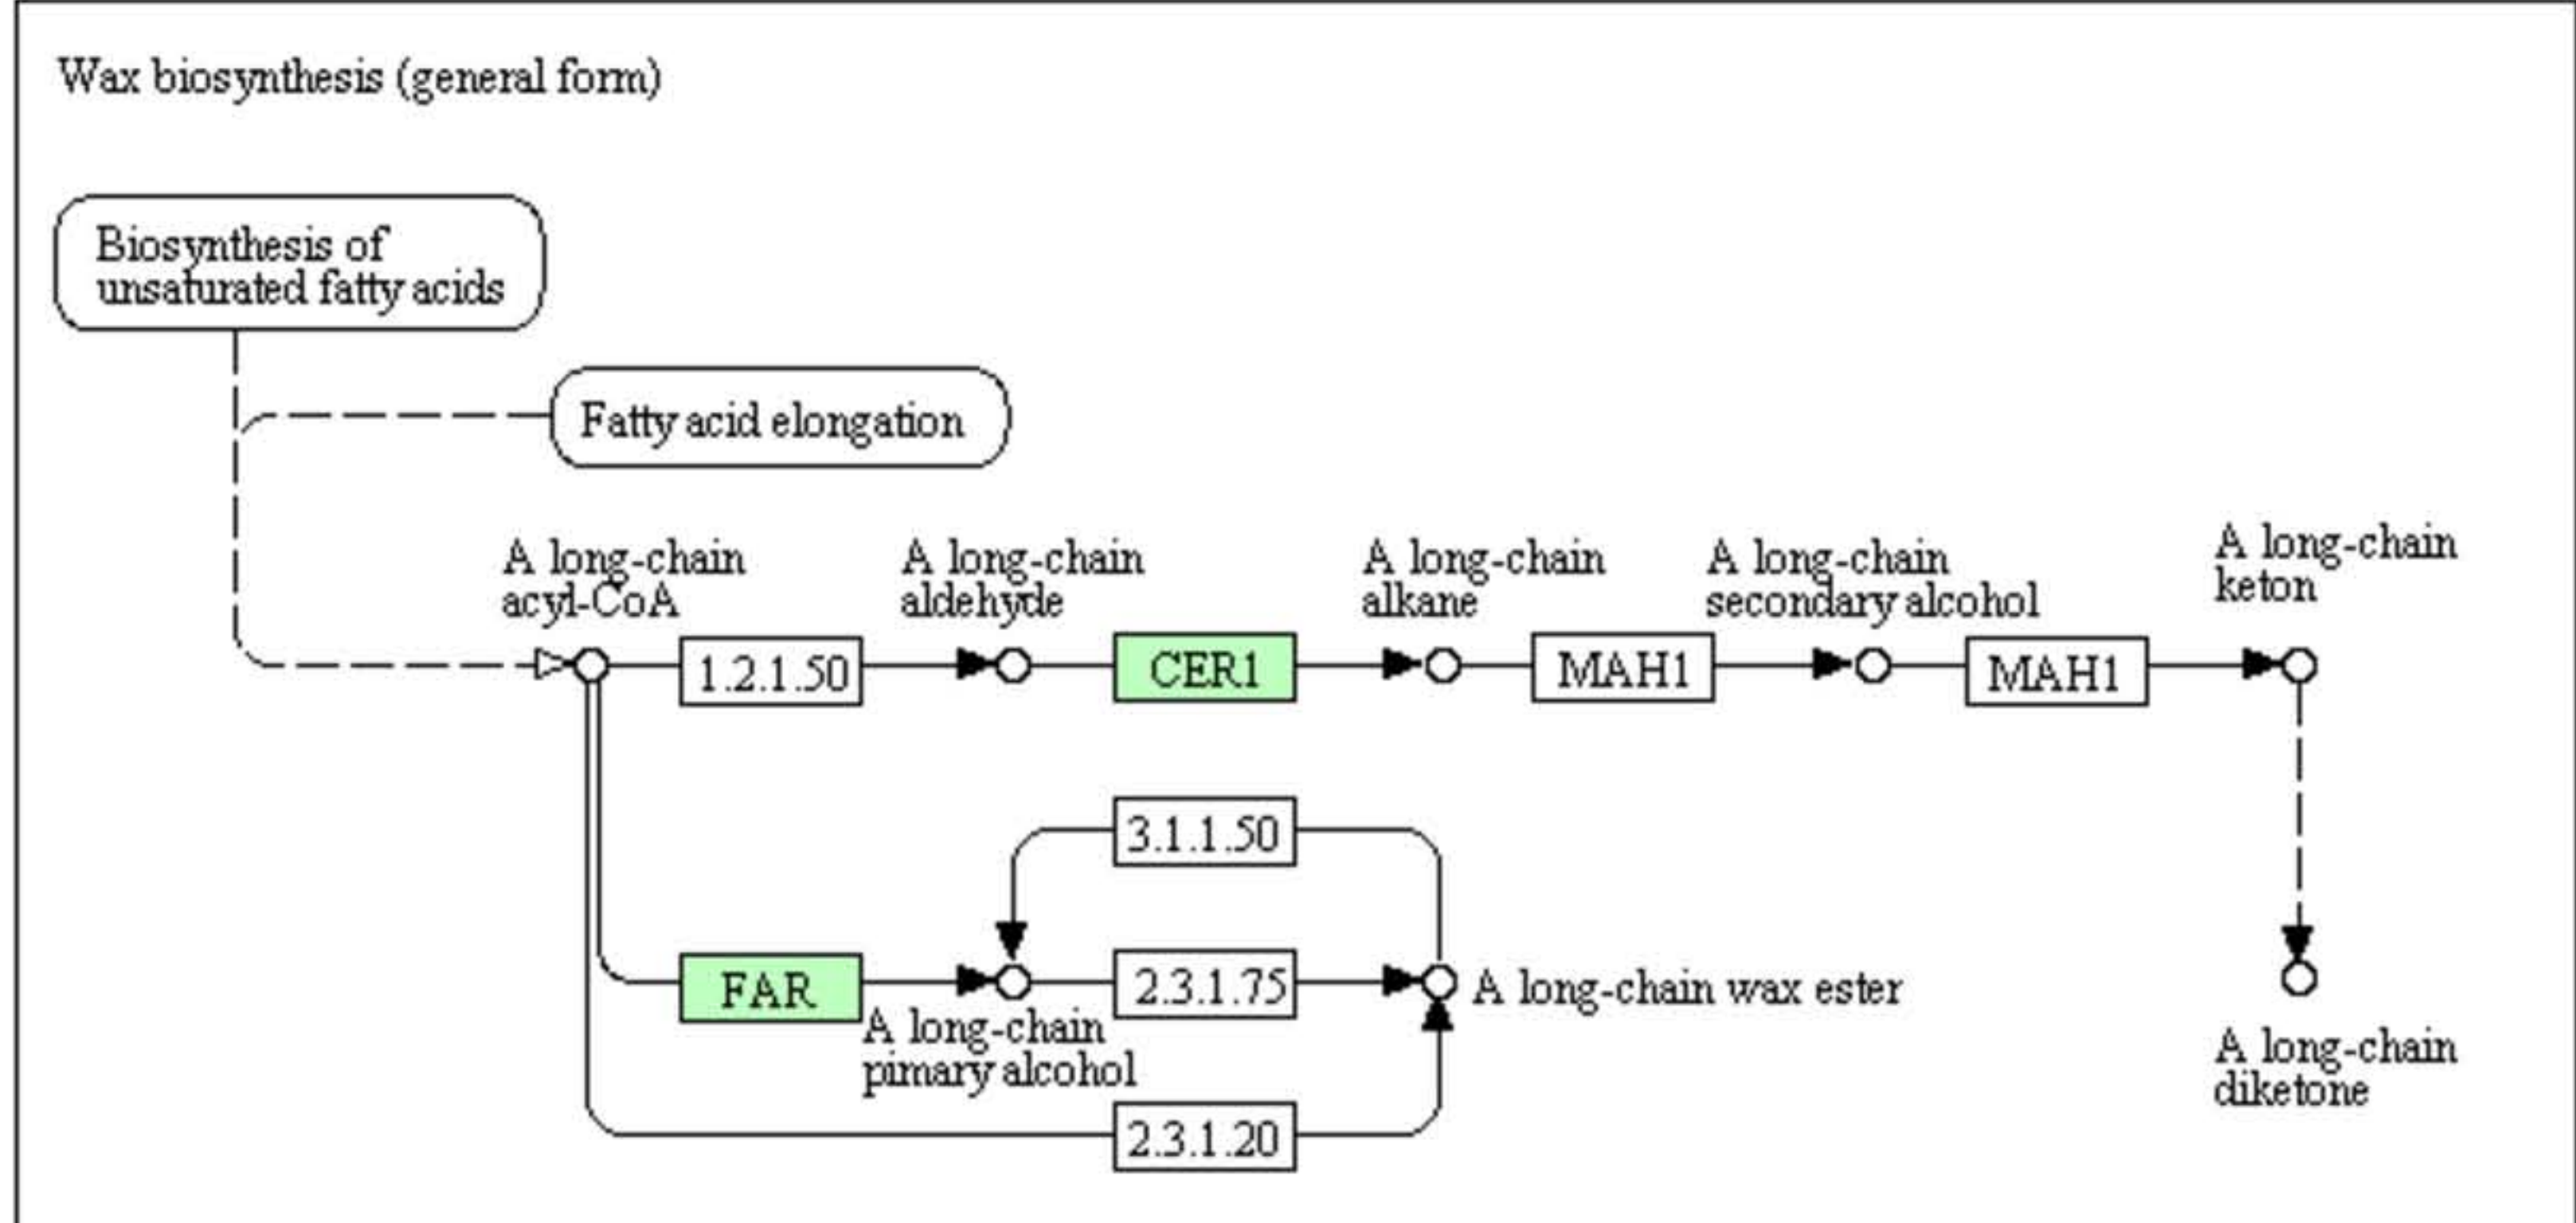

**Structure of common wax**

|                                       |                                       |                                       |                         |
|---------------------------------------|---------------------------------------|---------------------------------------|-------------------------|
| Alkenes                               | Aldehydes                             | Secondary alcohols                    | Ketons                  |
| <chem>R-CH=CH-R'</chem>               | <chem>R-CHO</chem>                    | <chem>R-CH(OH)-R'</chem>              | <chem>R-C(=O)-R'</chem> |
| Diketones                             |                                       |                                       |                         |
| <chem>R-C(=O)-CH2-CH2-C(=O)-R'</chem> | <chem>R-C(=O)-CH2-CH2-C(=O)-R'</chem> | <chem>R-C(=O)-CH2-CH2-C(=O)-R'</chem> |                         |
| Primary alcohols                      |                                       | Alkyl esters                          |                         |
| <chem>R-CH2-OH</chem>                 | <chem>R'-CO-O-CH2-CH2-R</chem>        |                                       |                         |



CYANOAMINO ACID METABOLISM

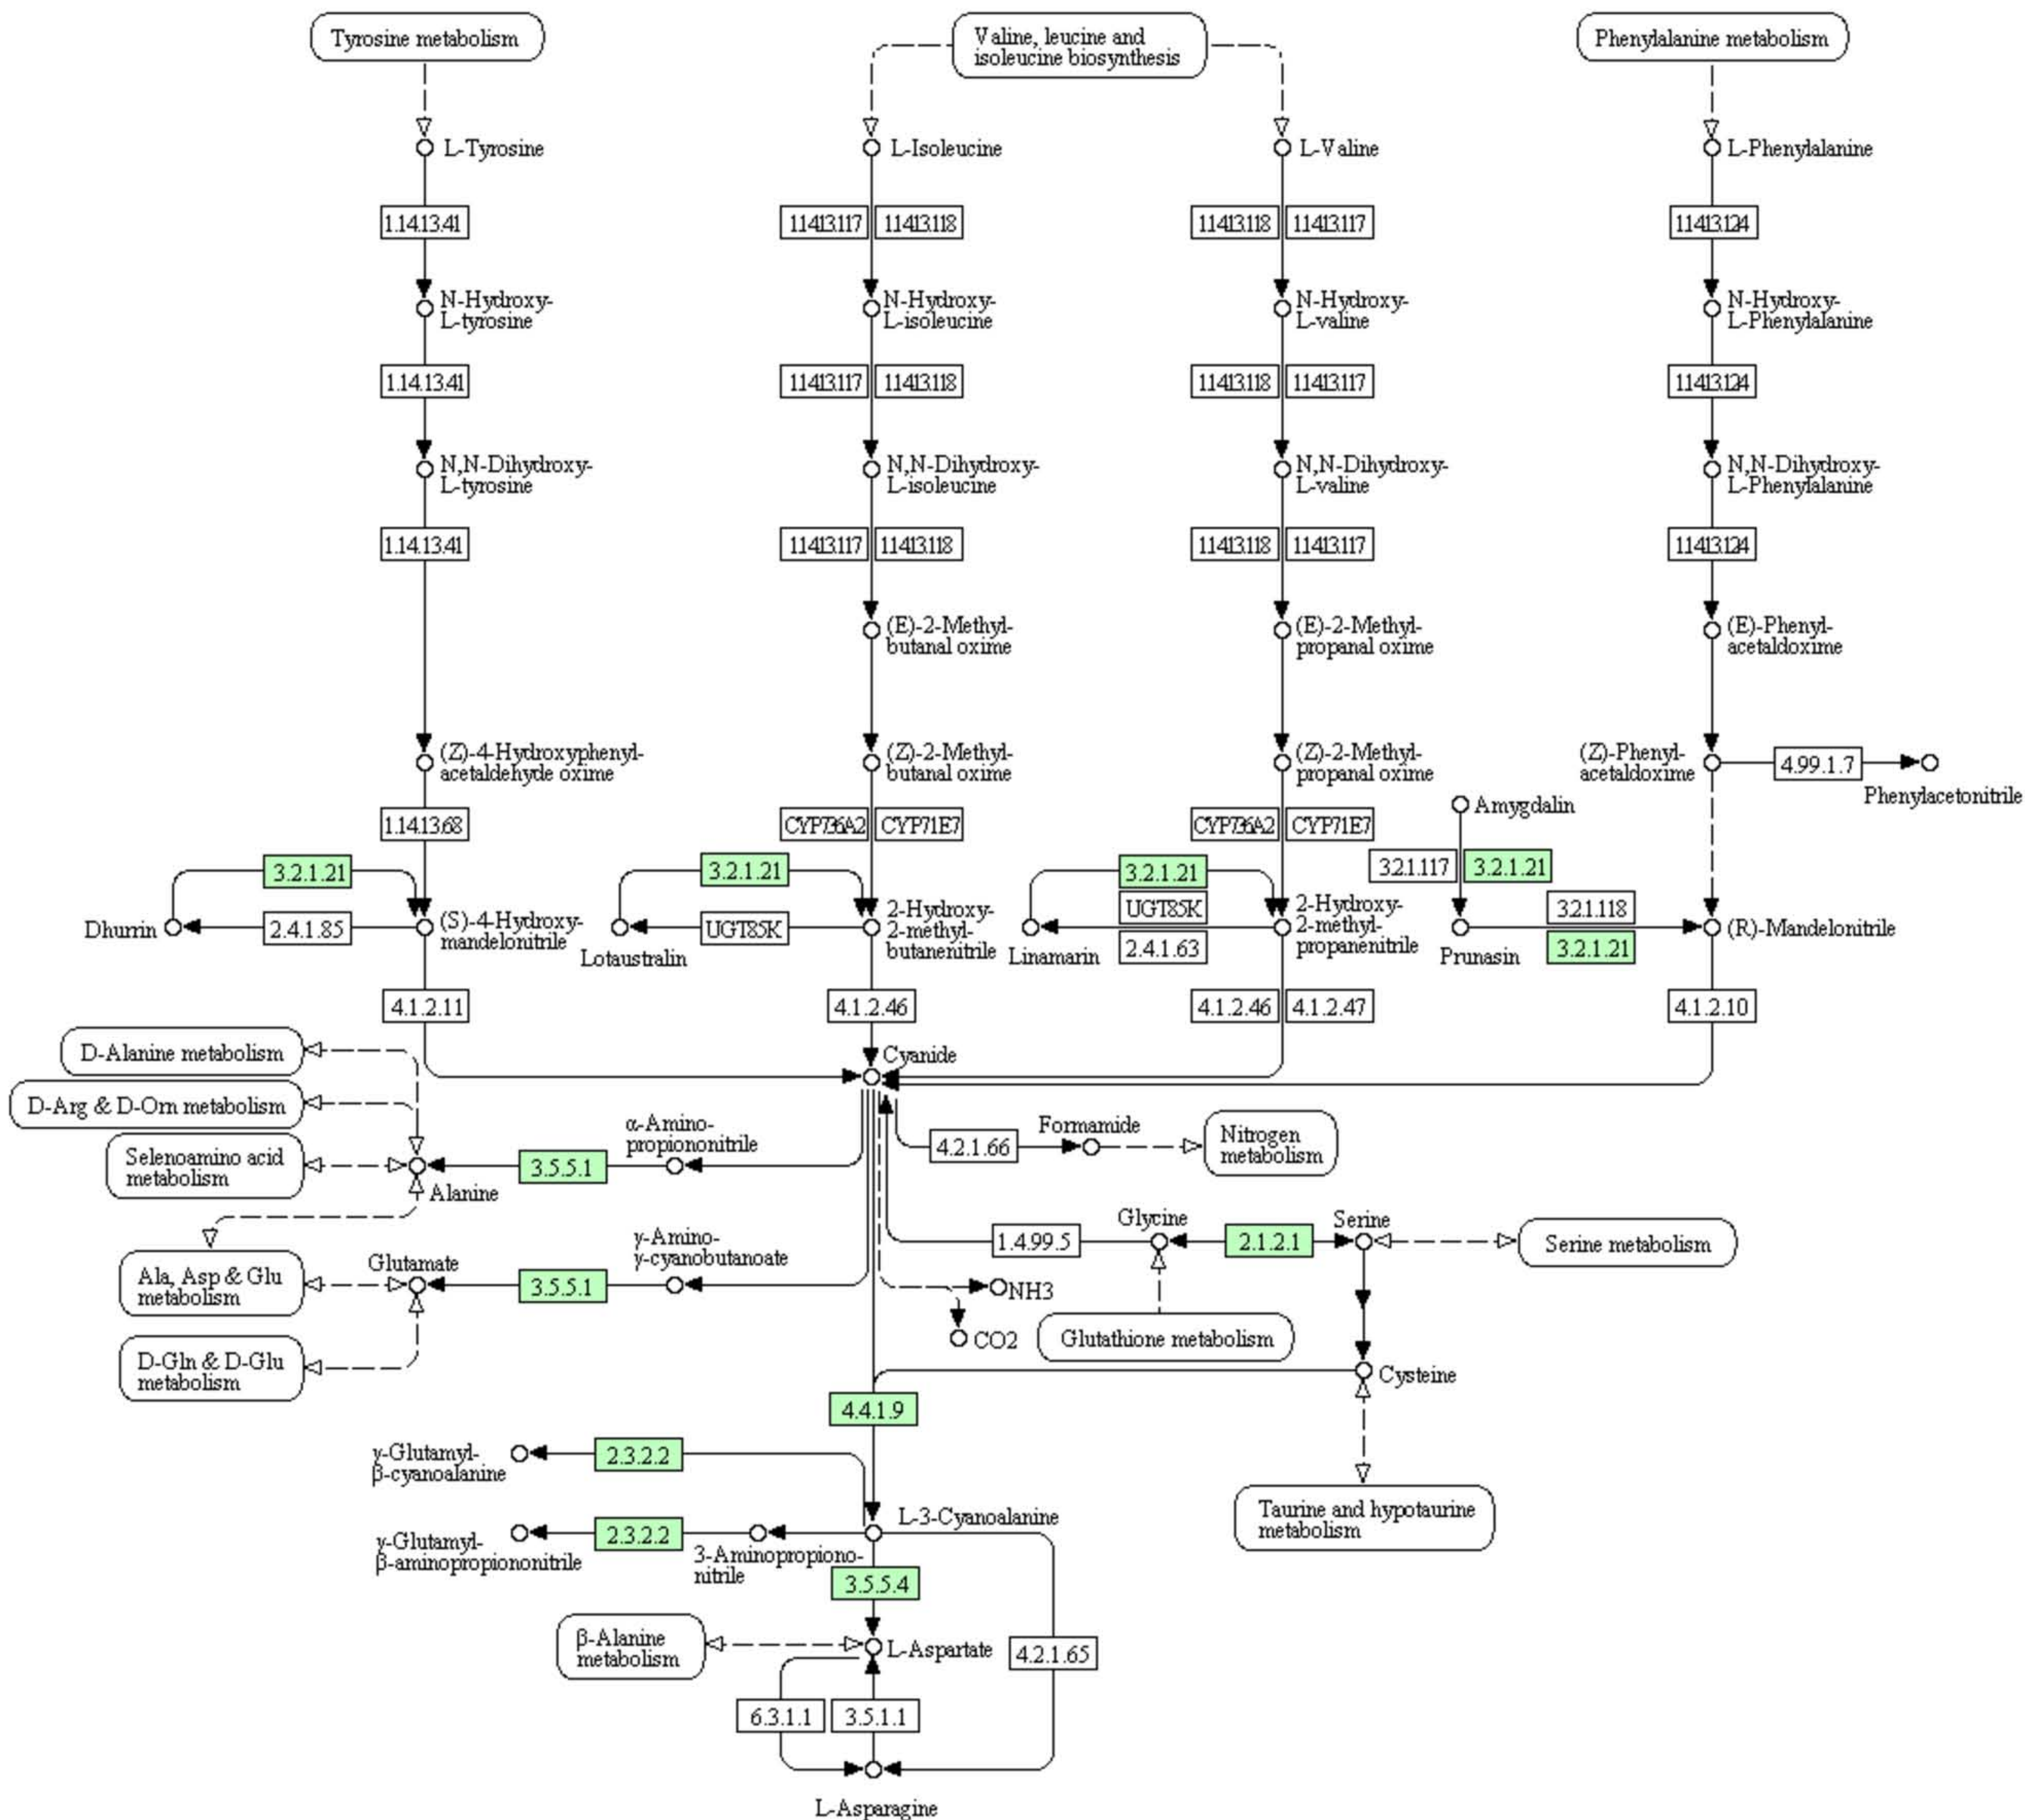







# DDT DEGRADATION

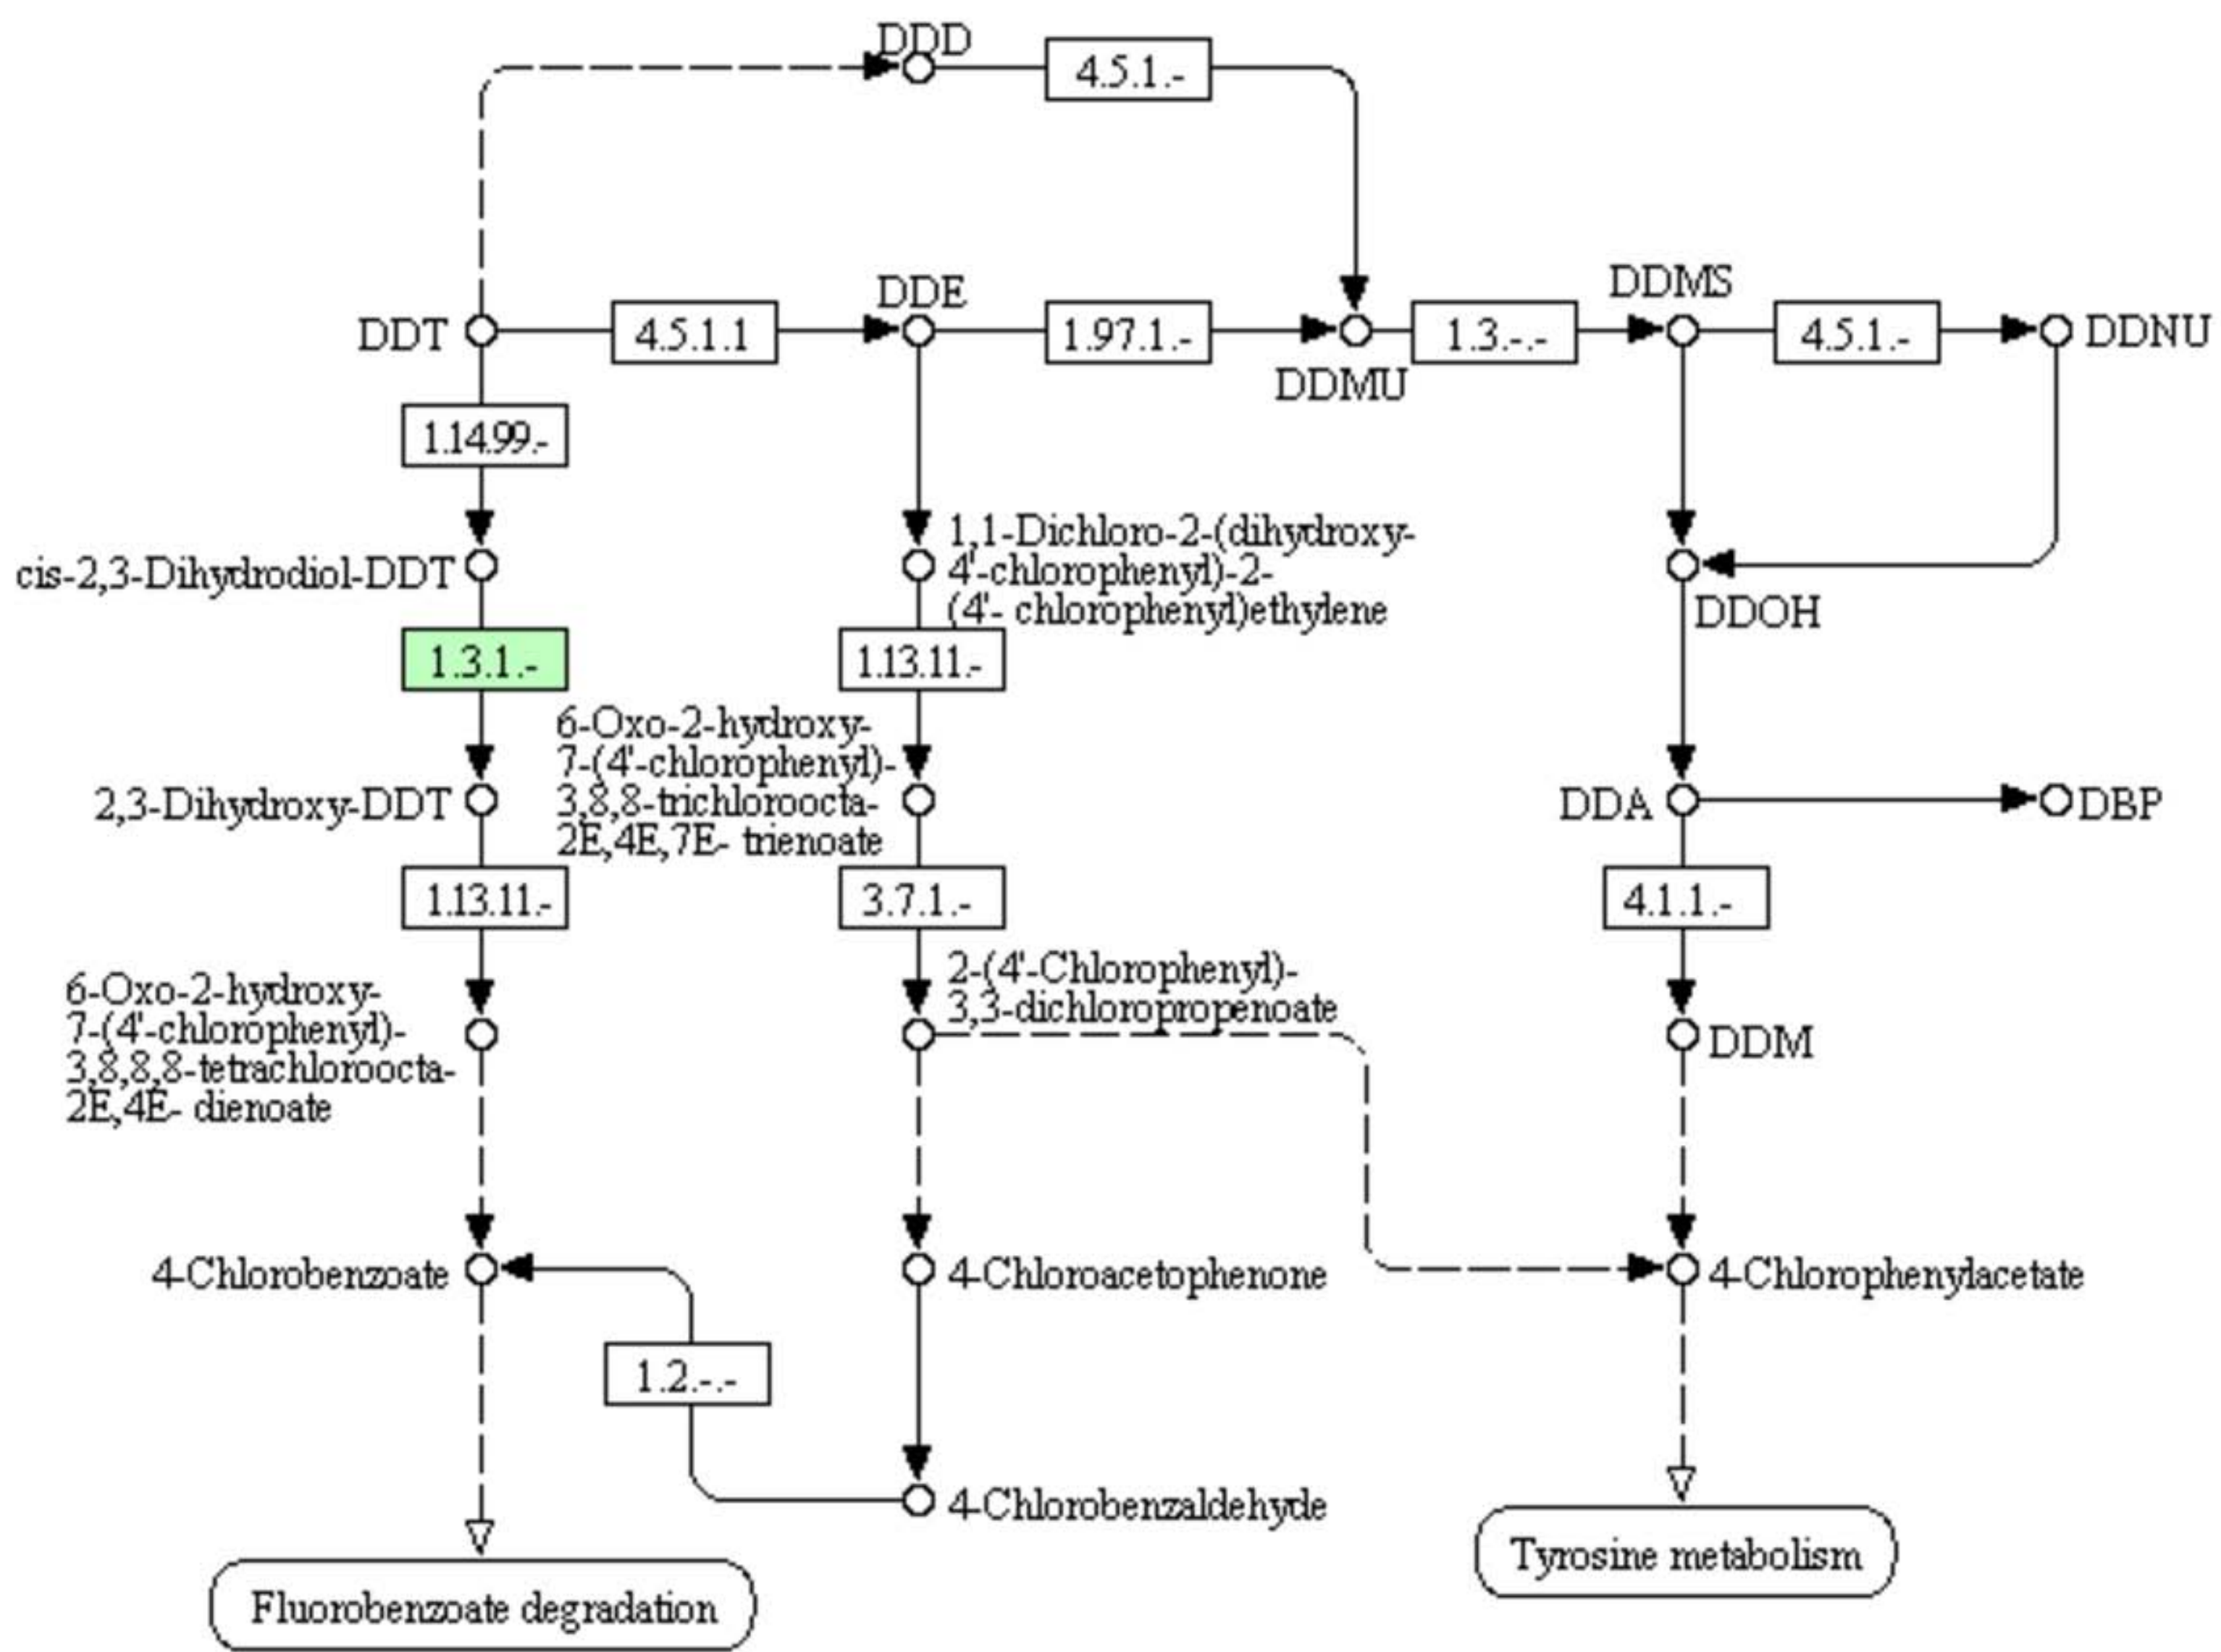



DEGRADATION OF AROMATIC COMPOUNDS

dioxygenase and decarboxylating dehydrogenase reactions

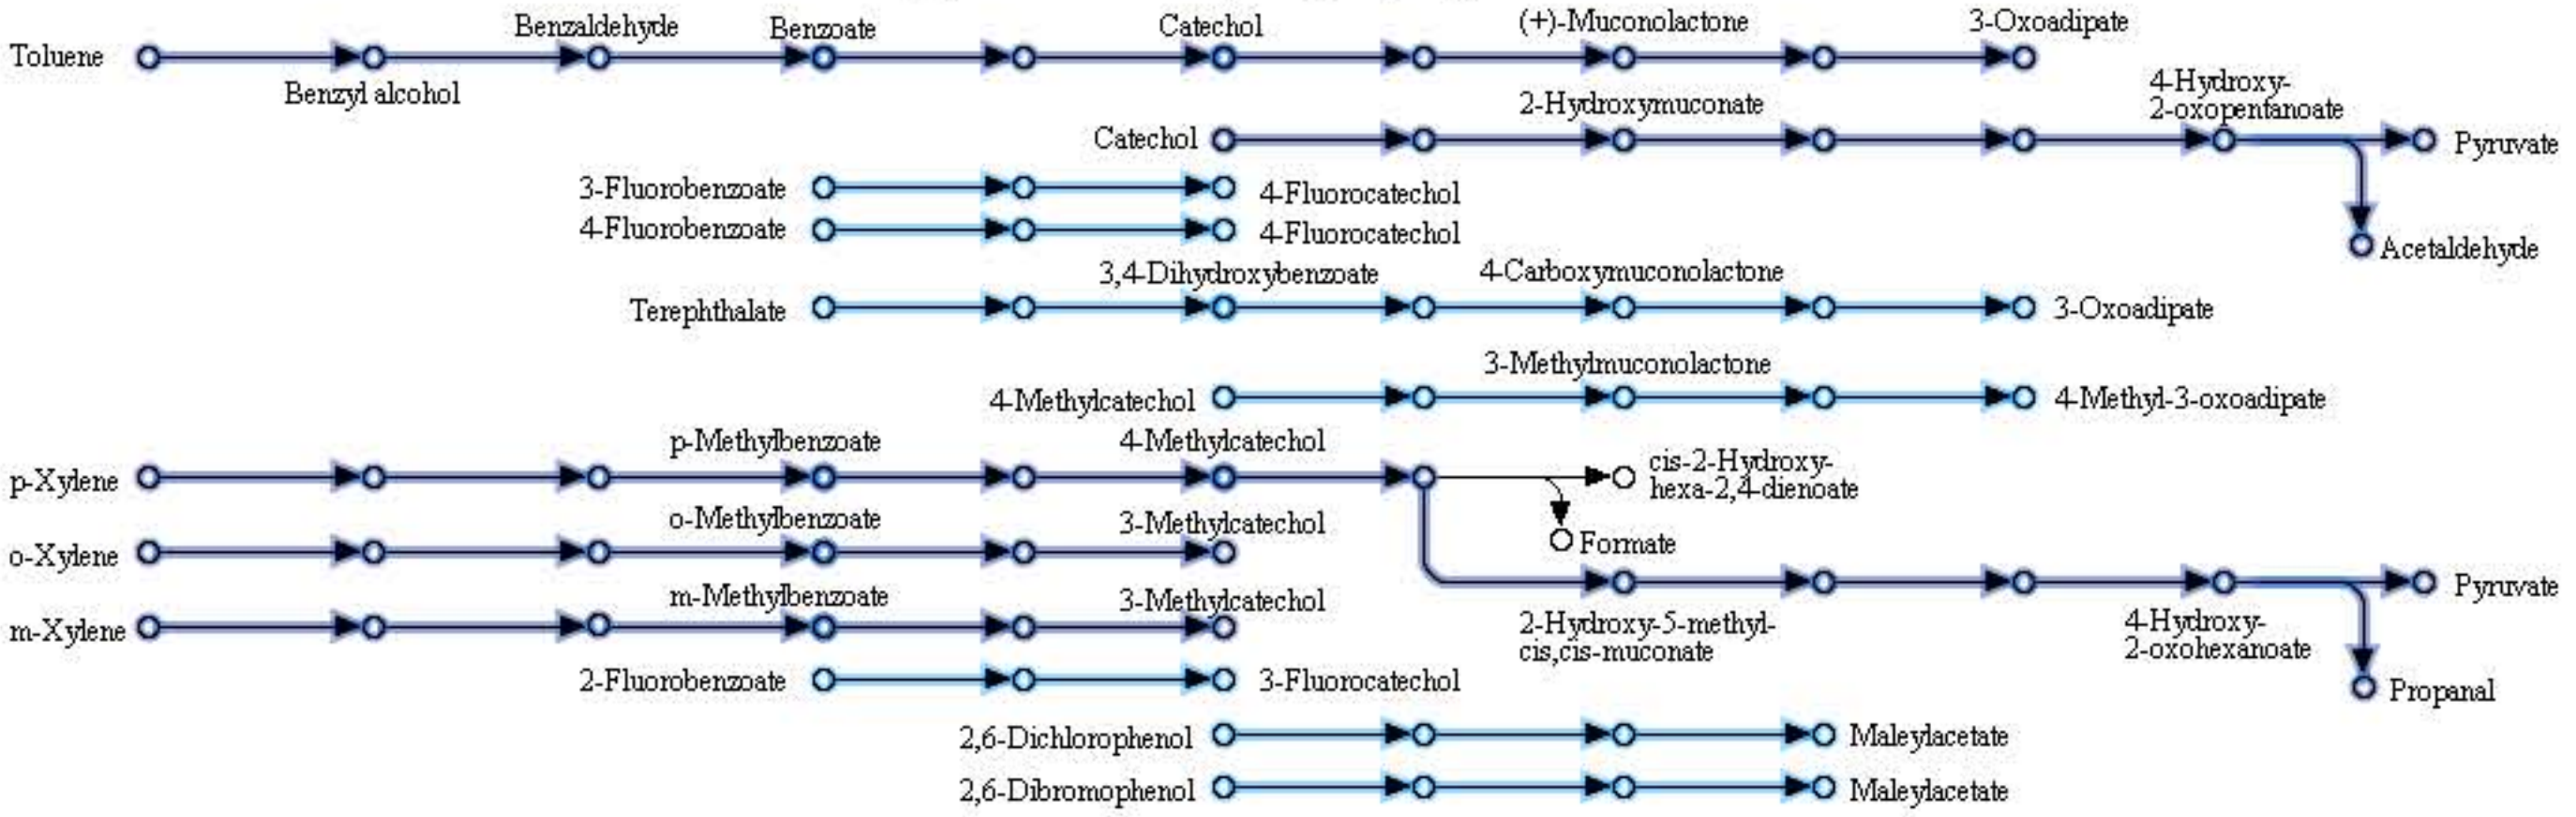

dioxygenase and dehydrogenase reactions

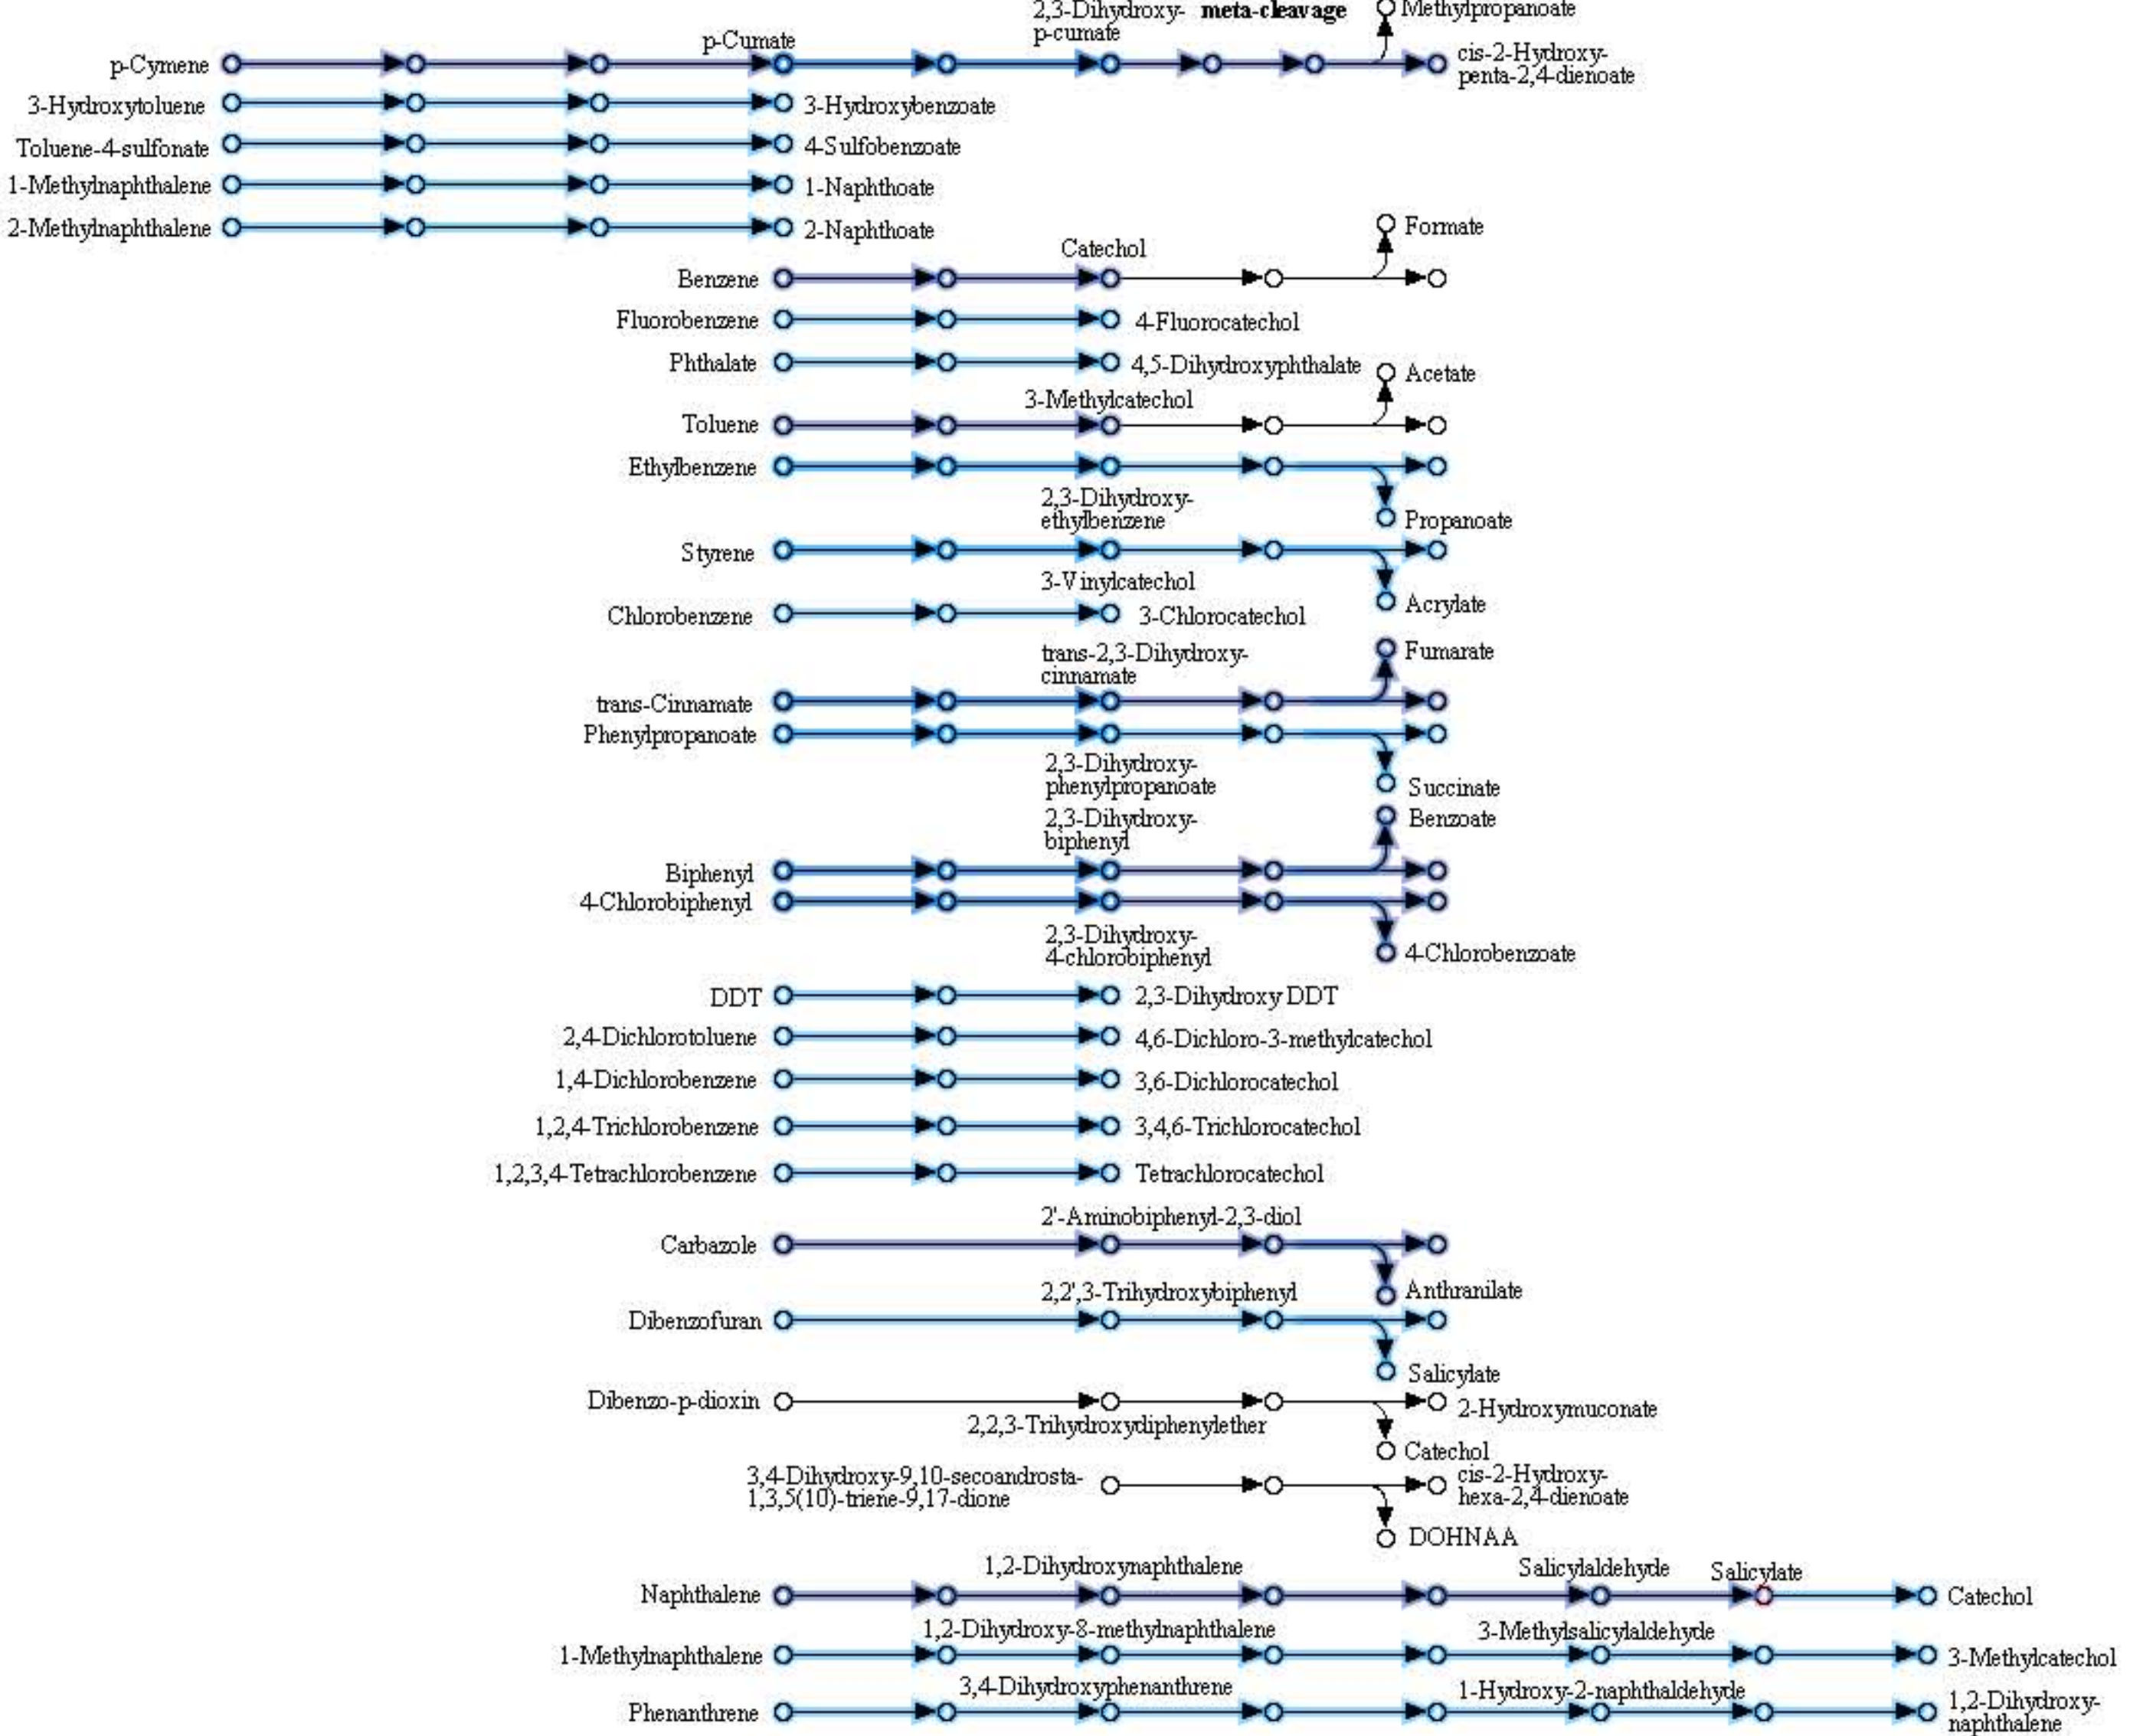

two monooxygenase reactions

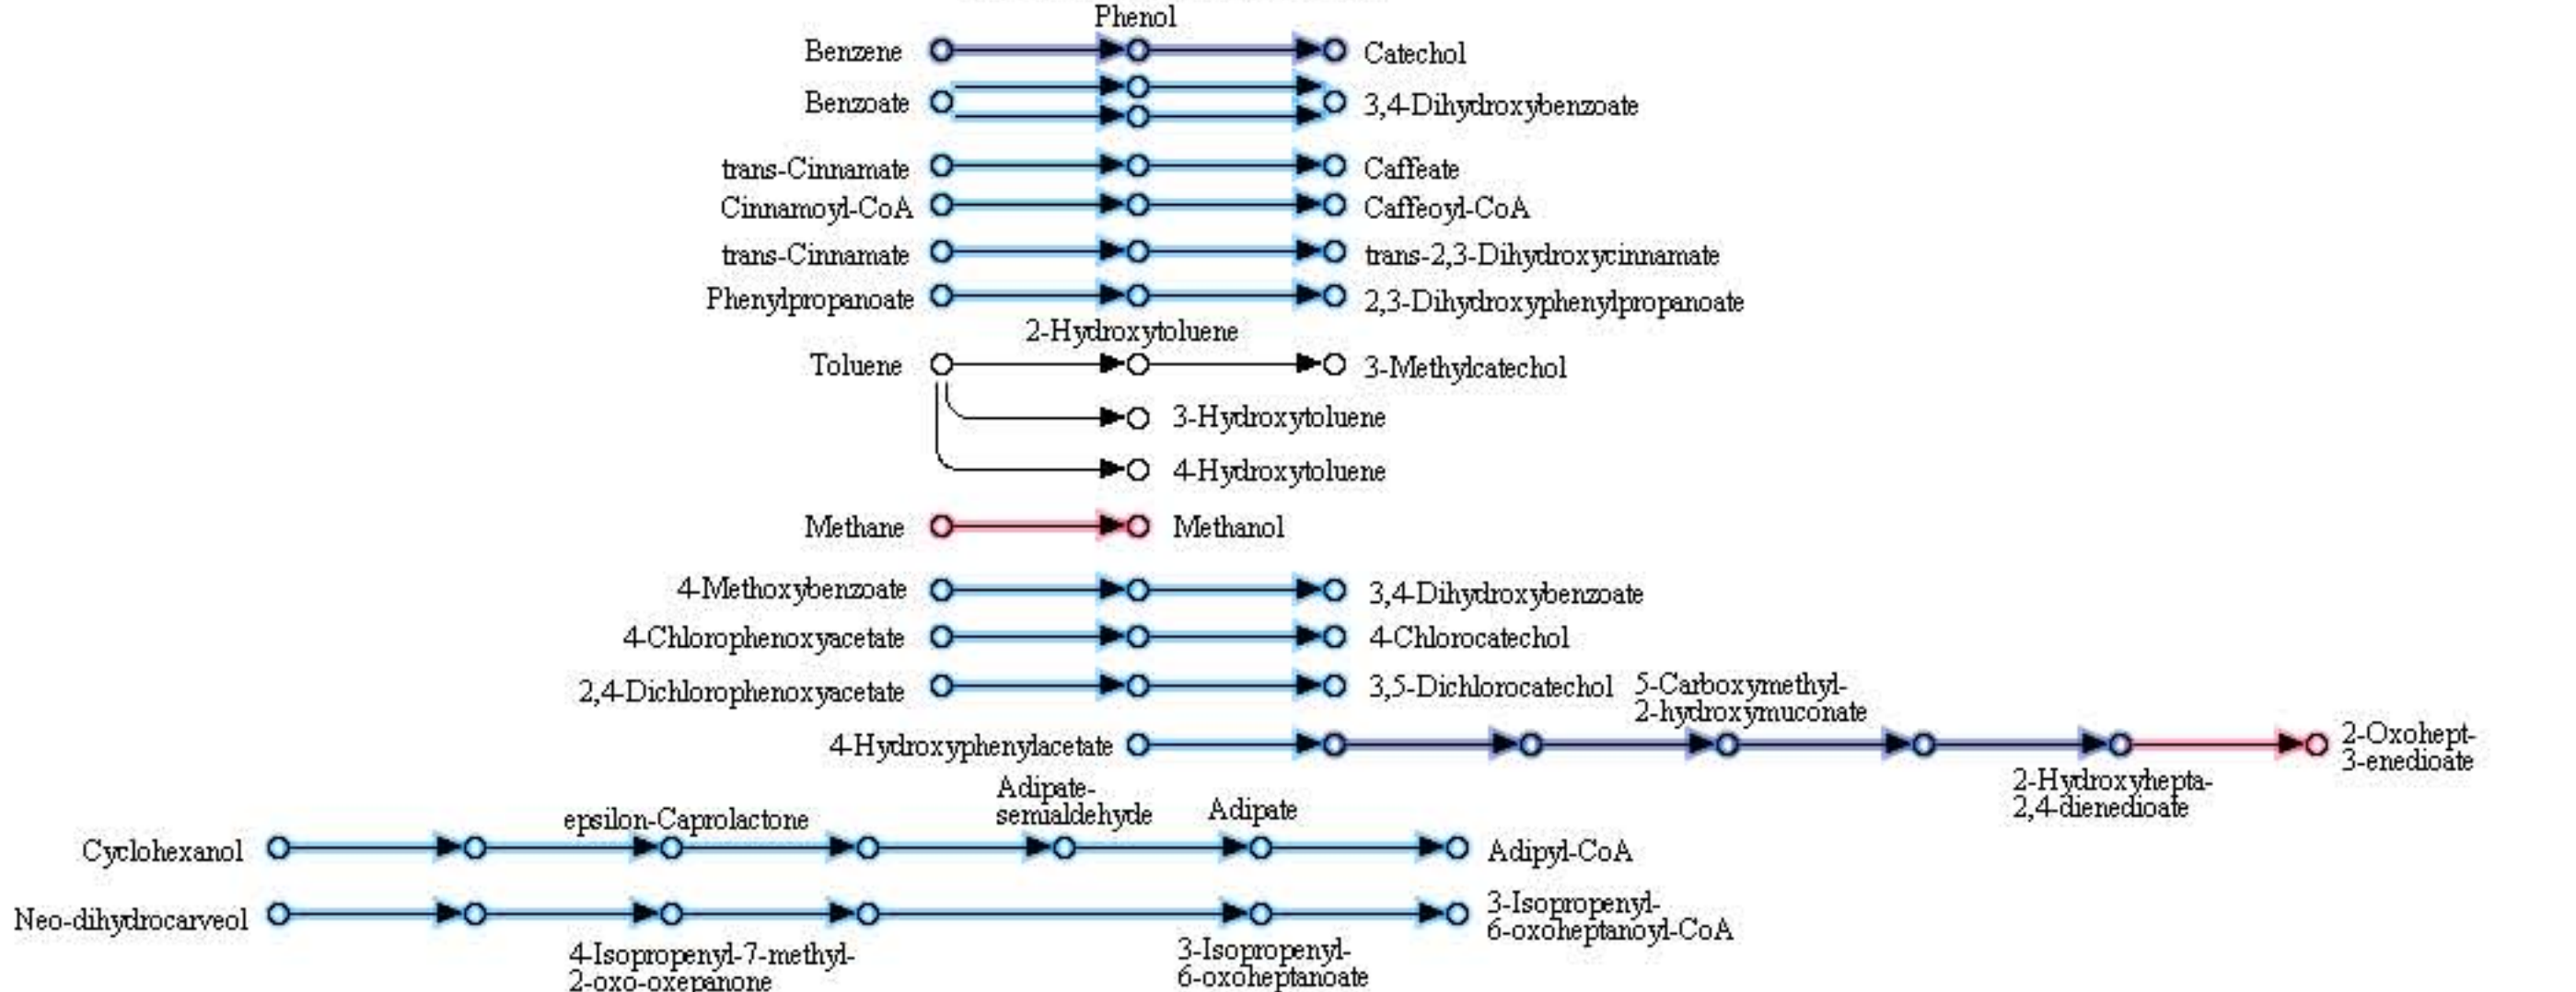

Anaerobic degradation

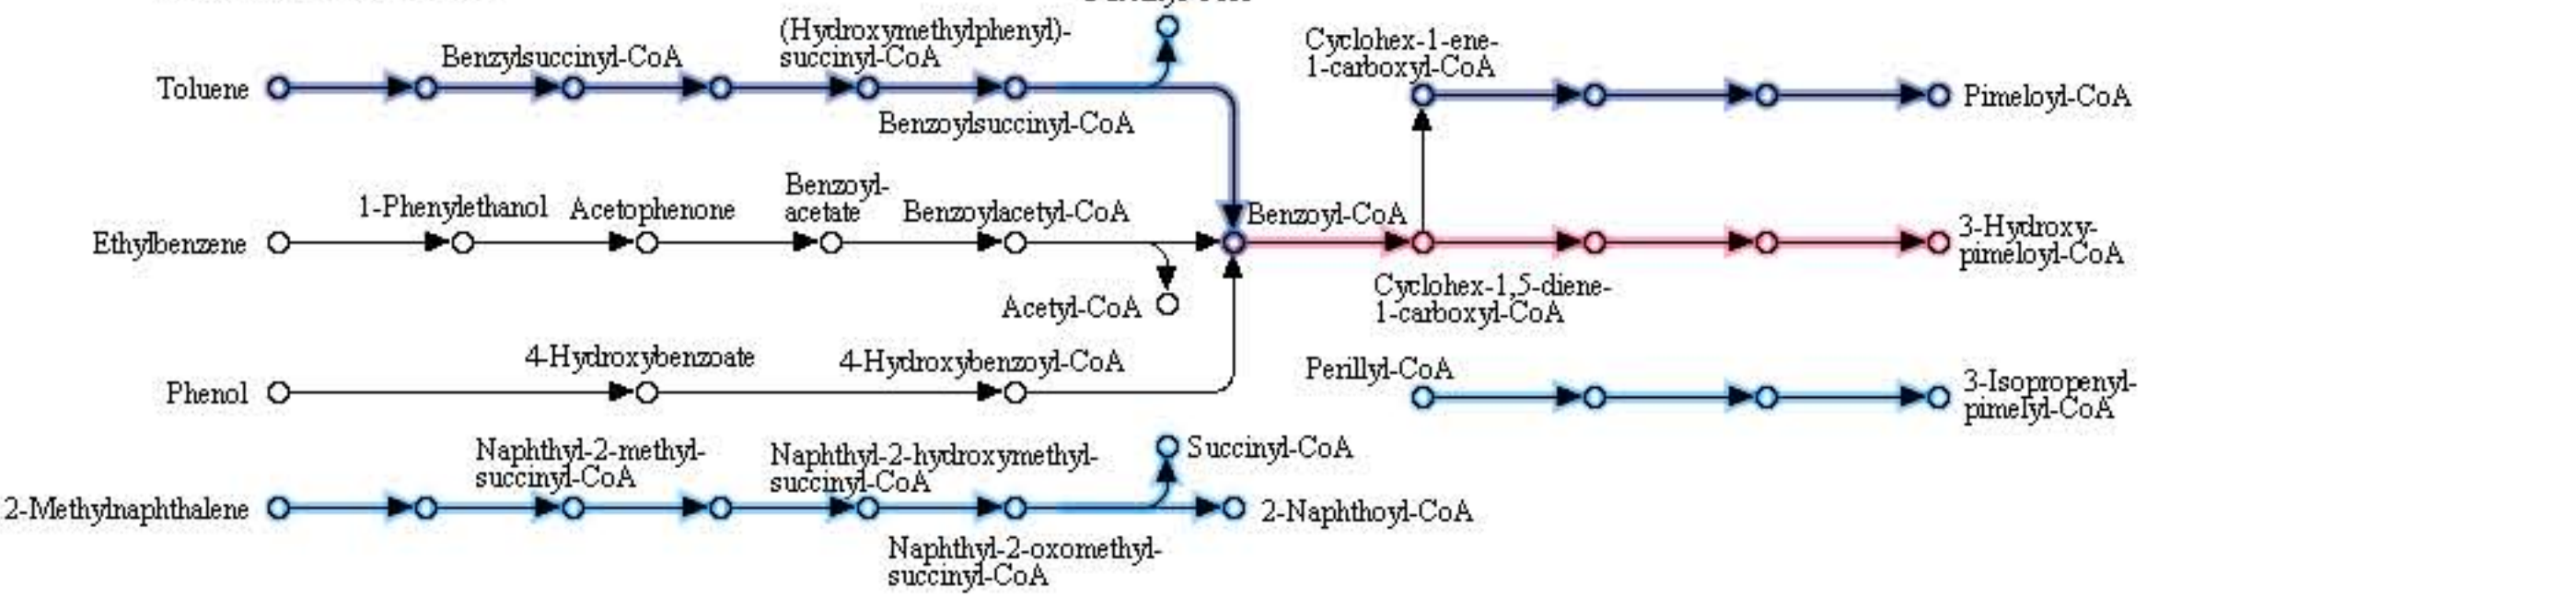







# DNA REPLICATION

## Replication complex (Prokaryotes)

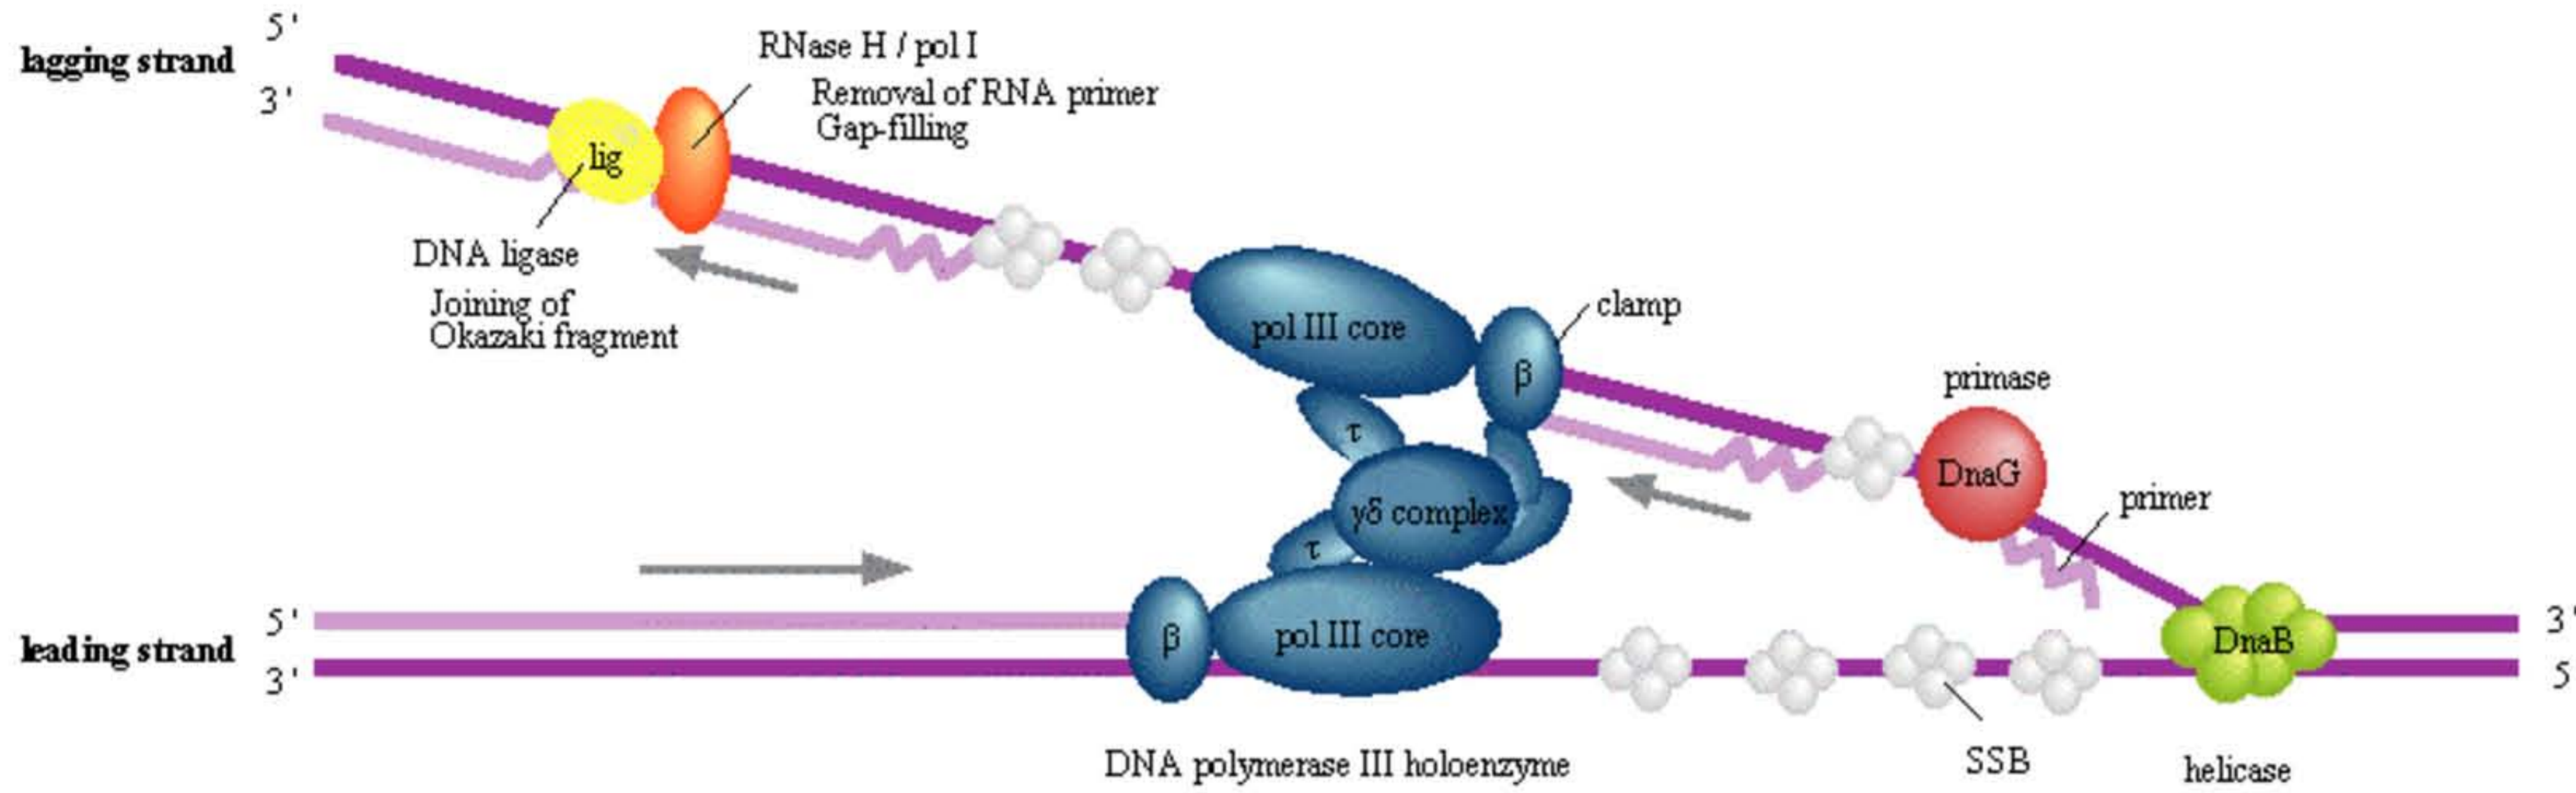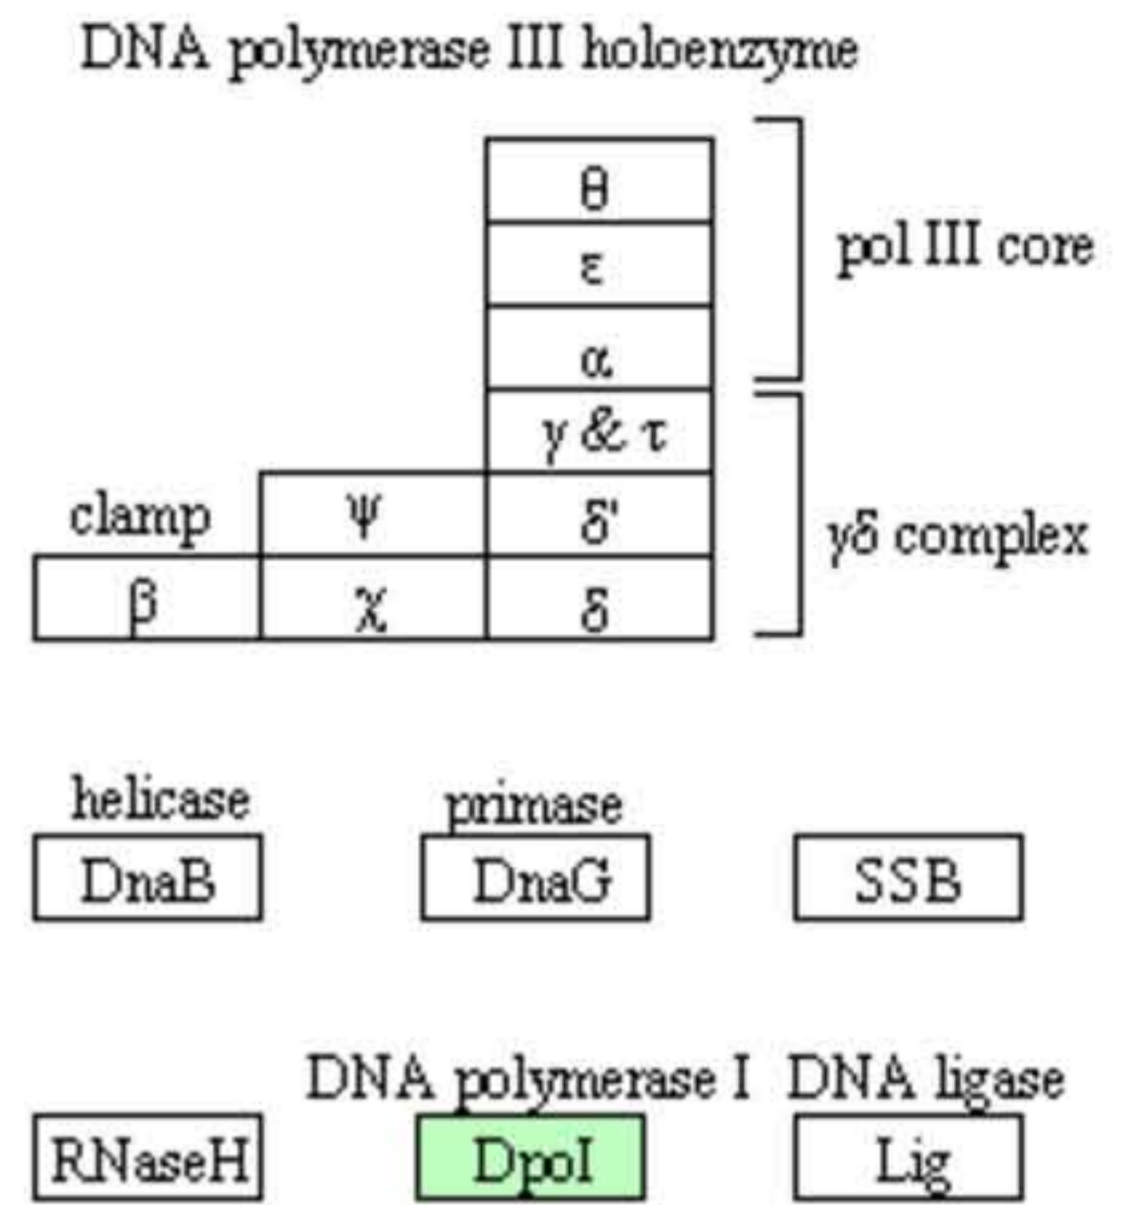

## Replication complex (Eukaryotes)

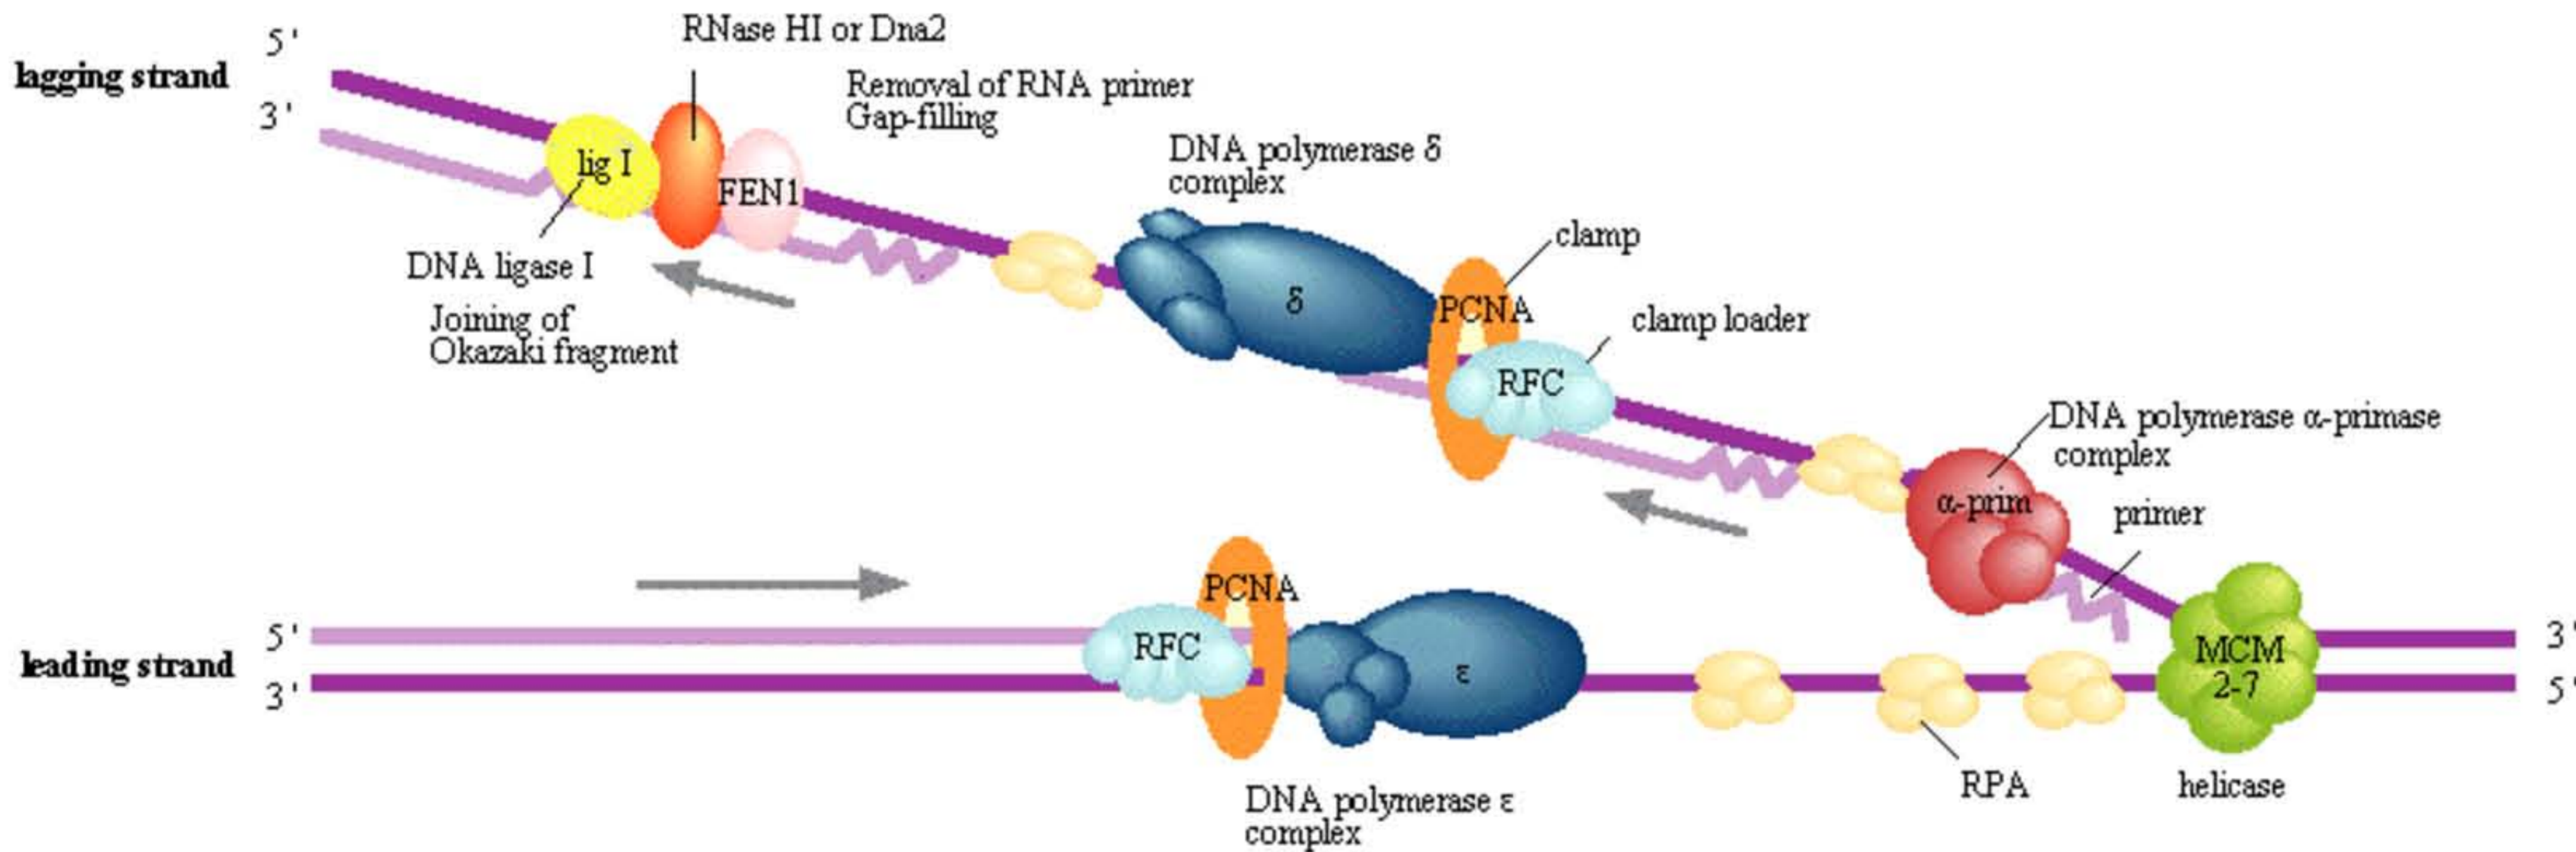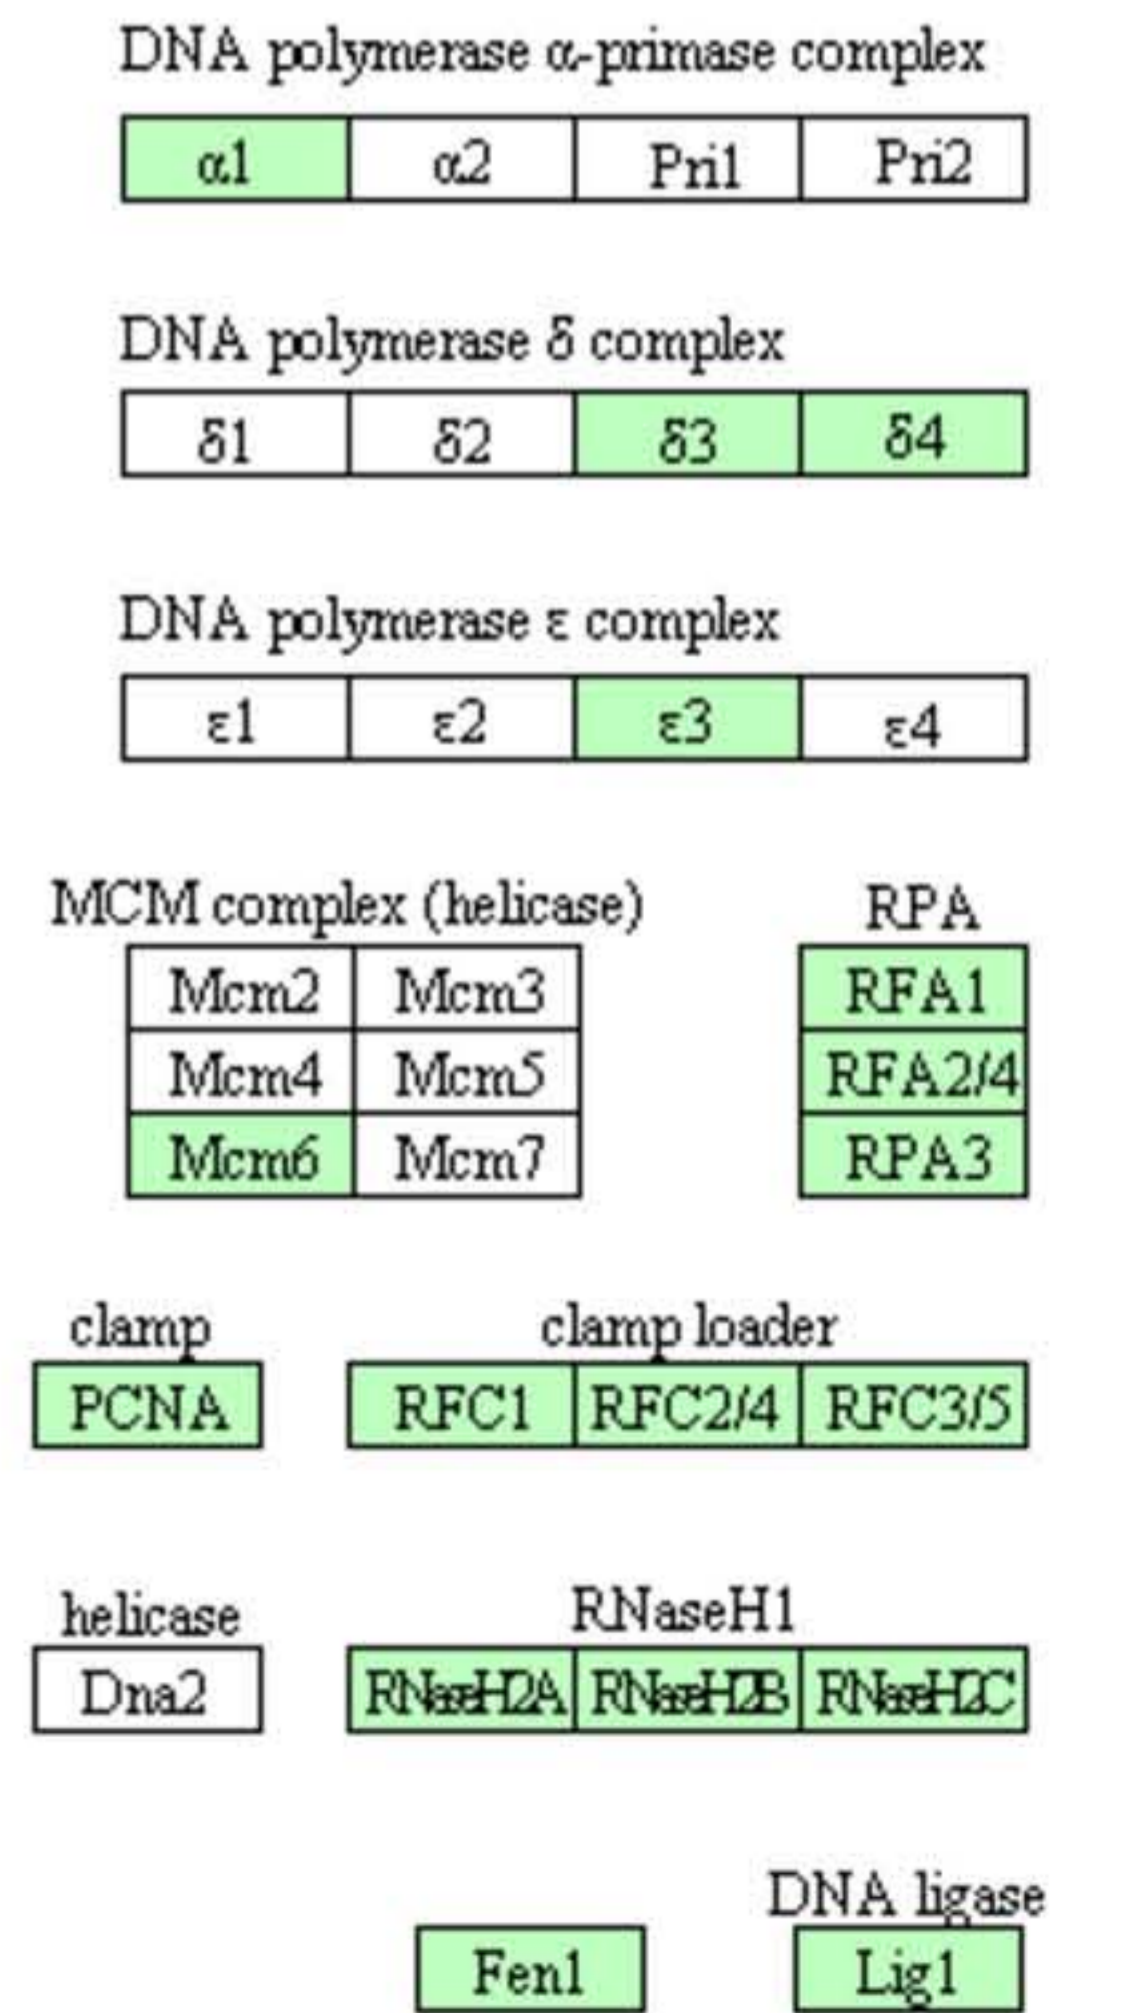



**Azathioprine & 6-Mercaptopurine**

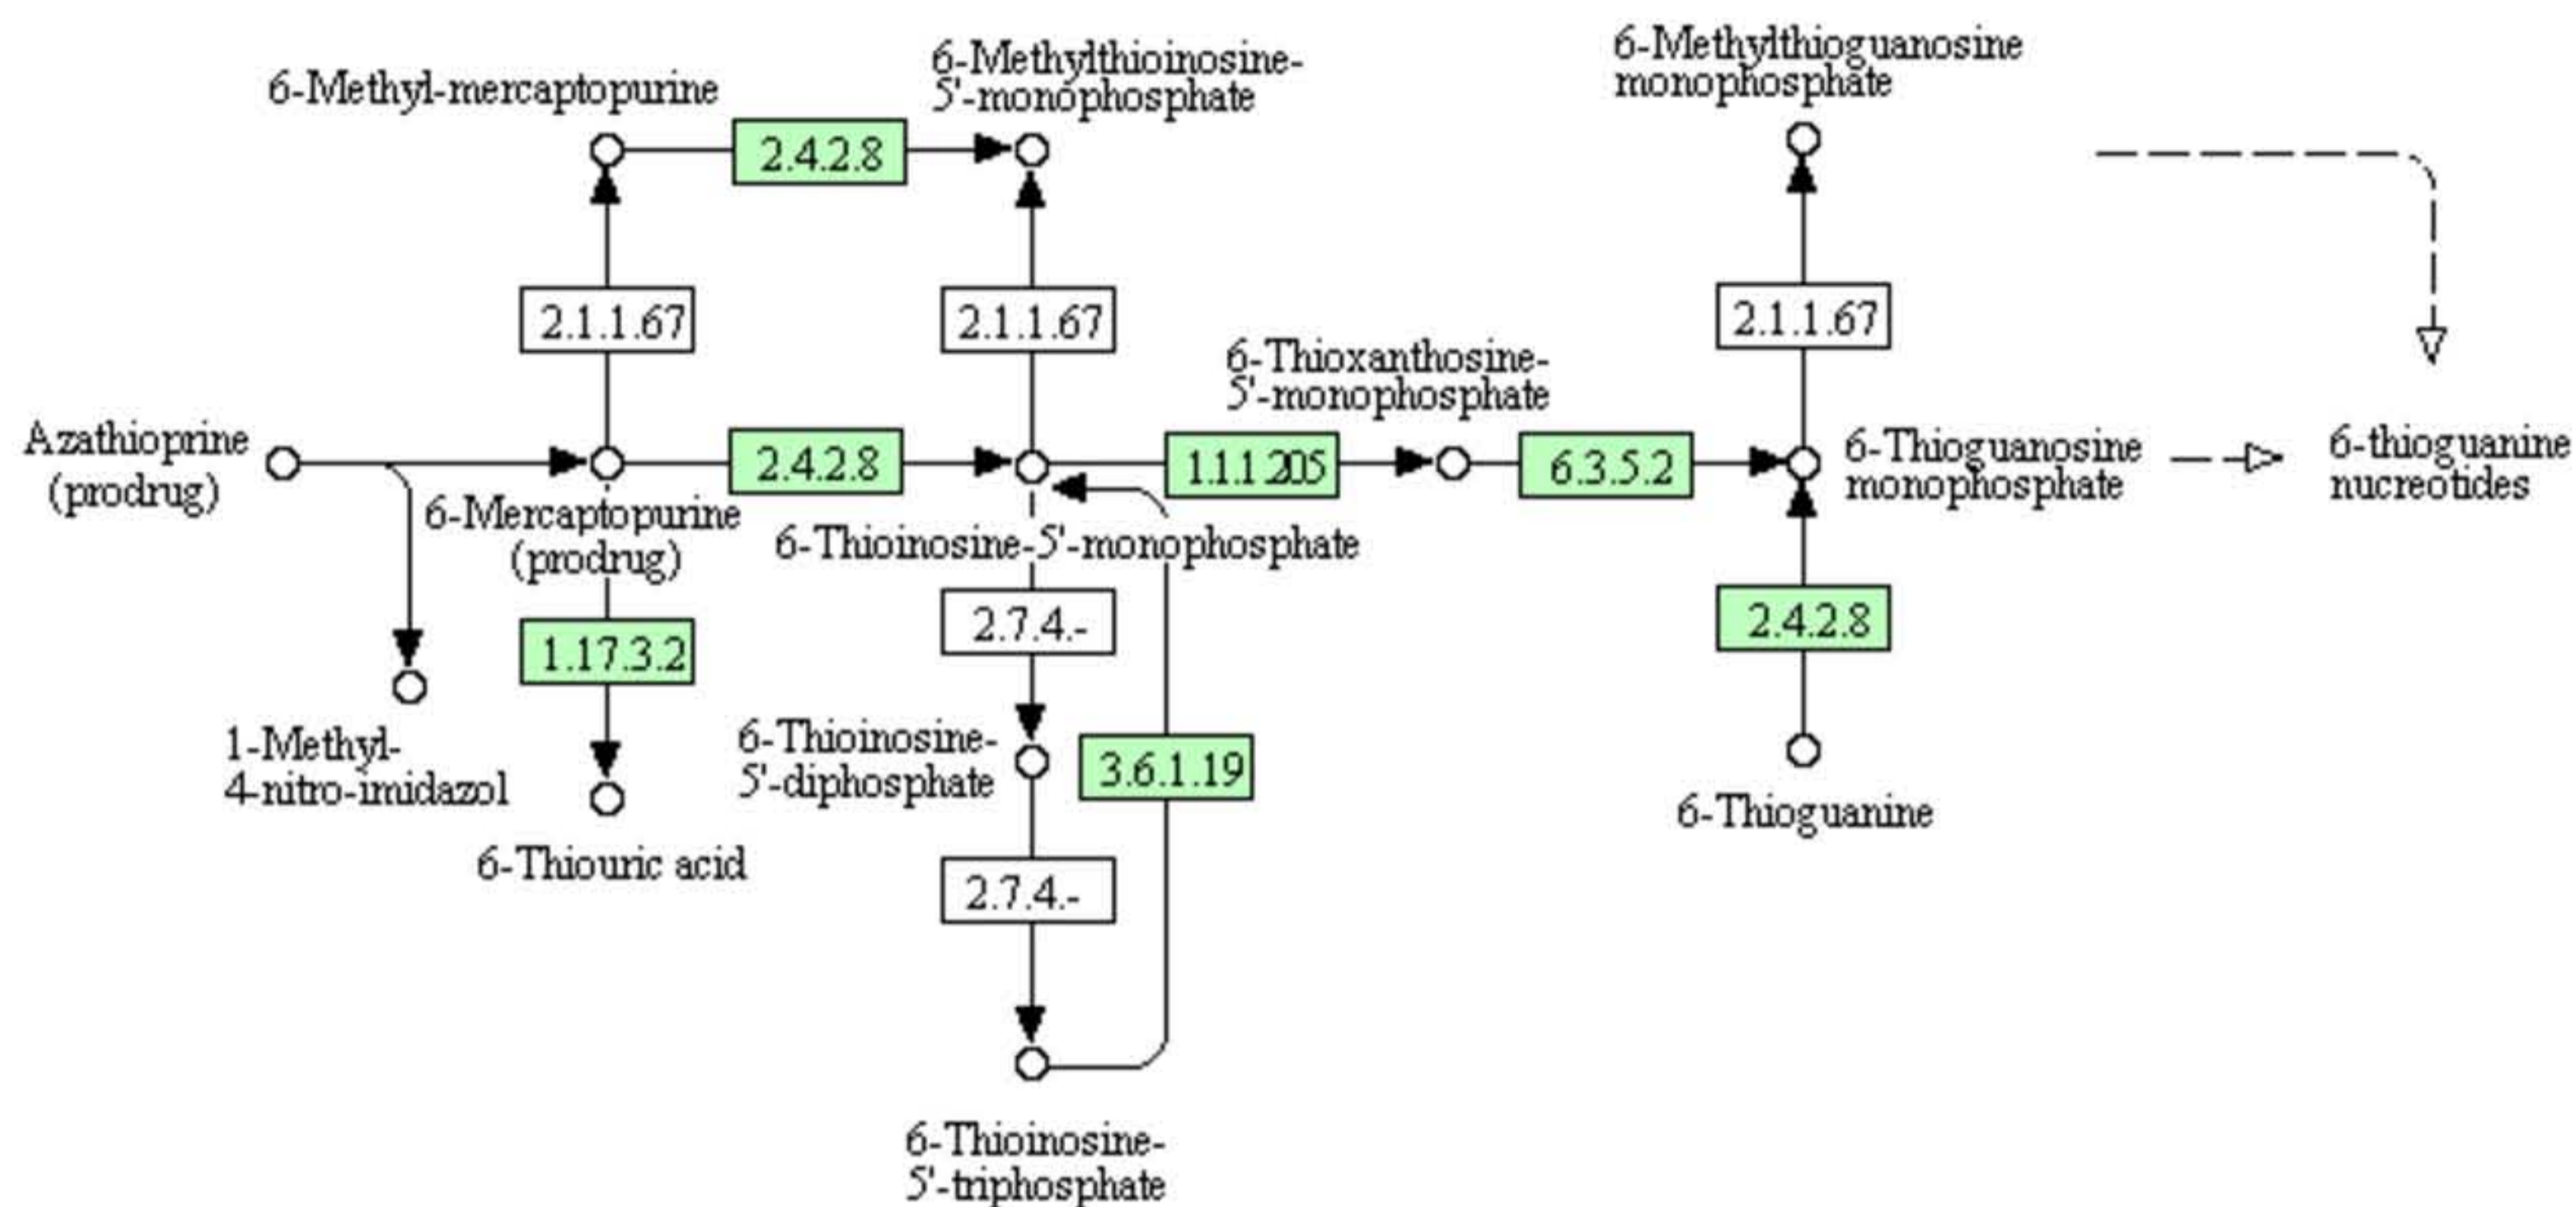

**Irinotecan**

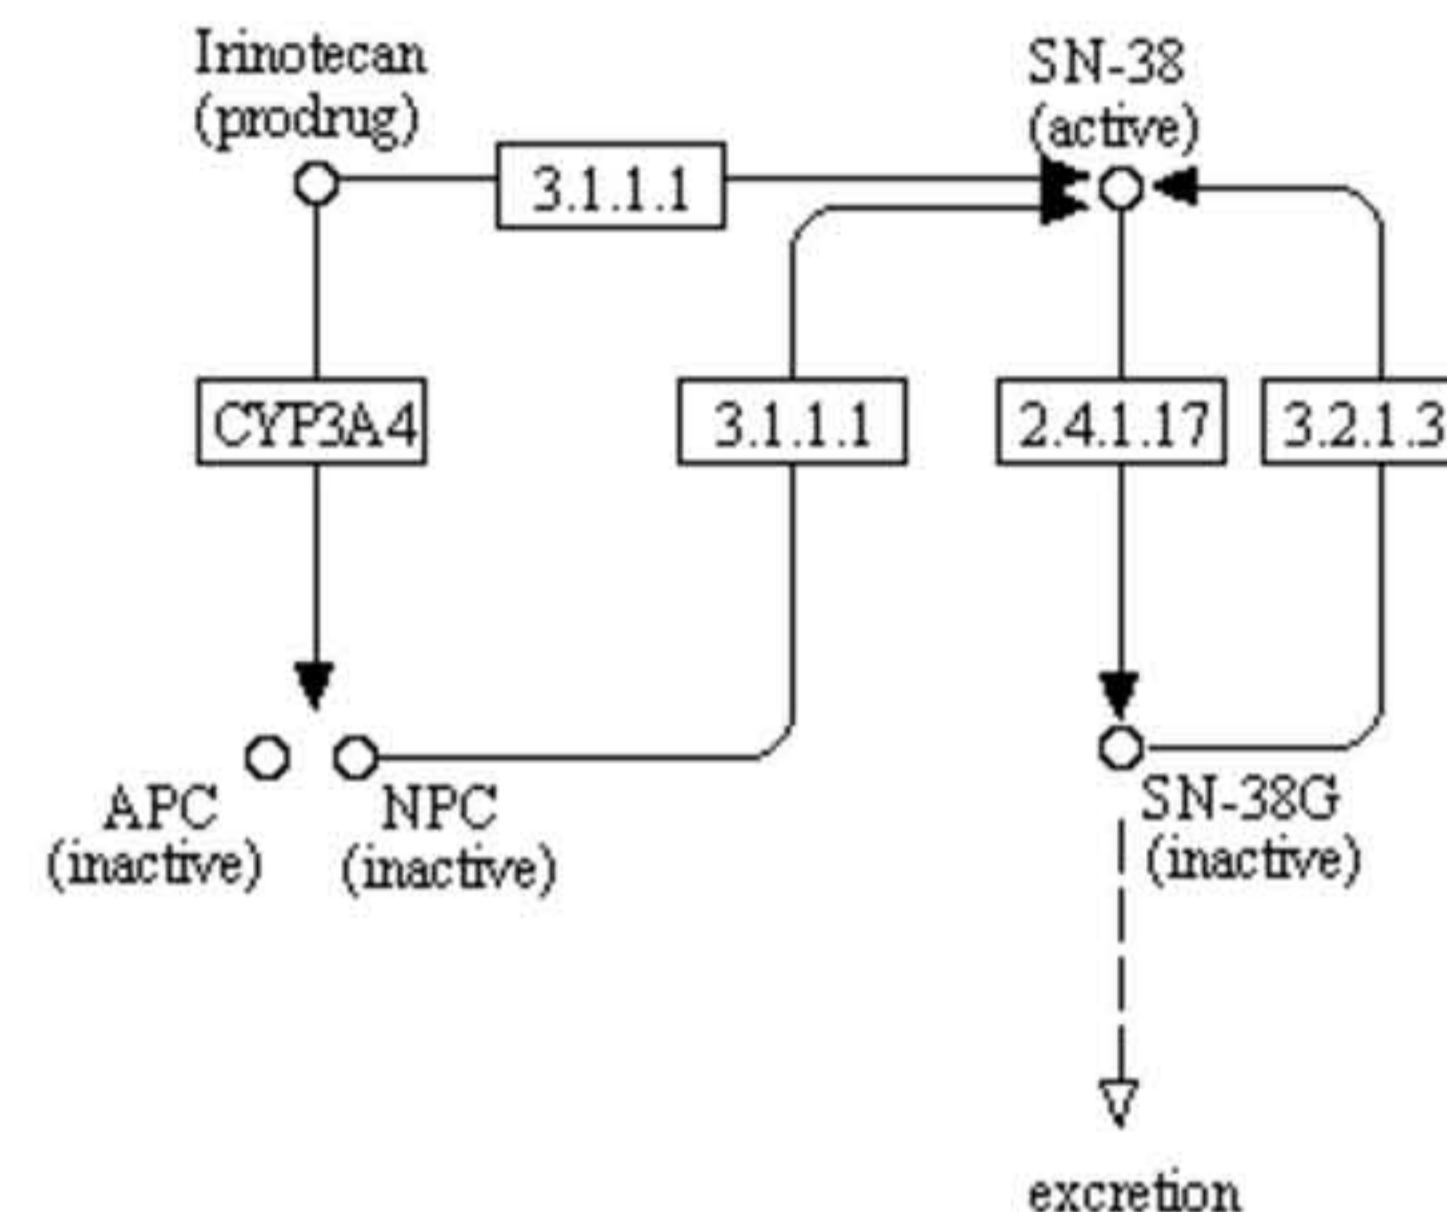

**Fluorouracil**

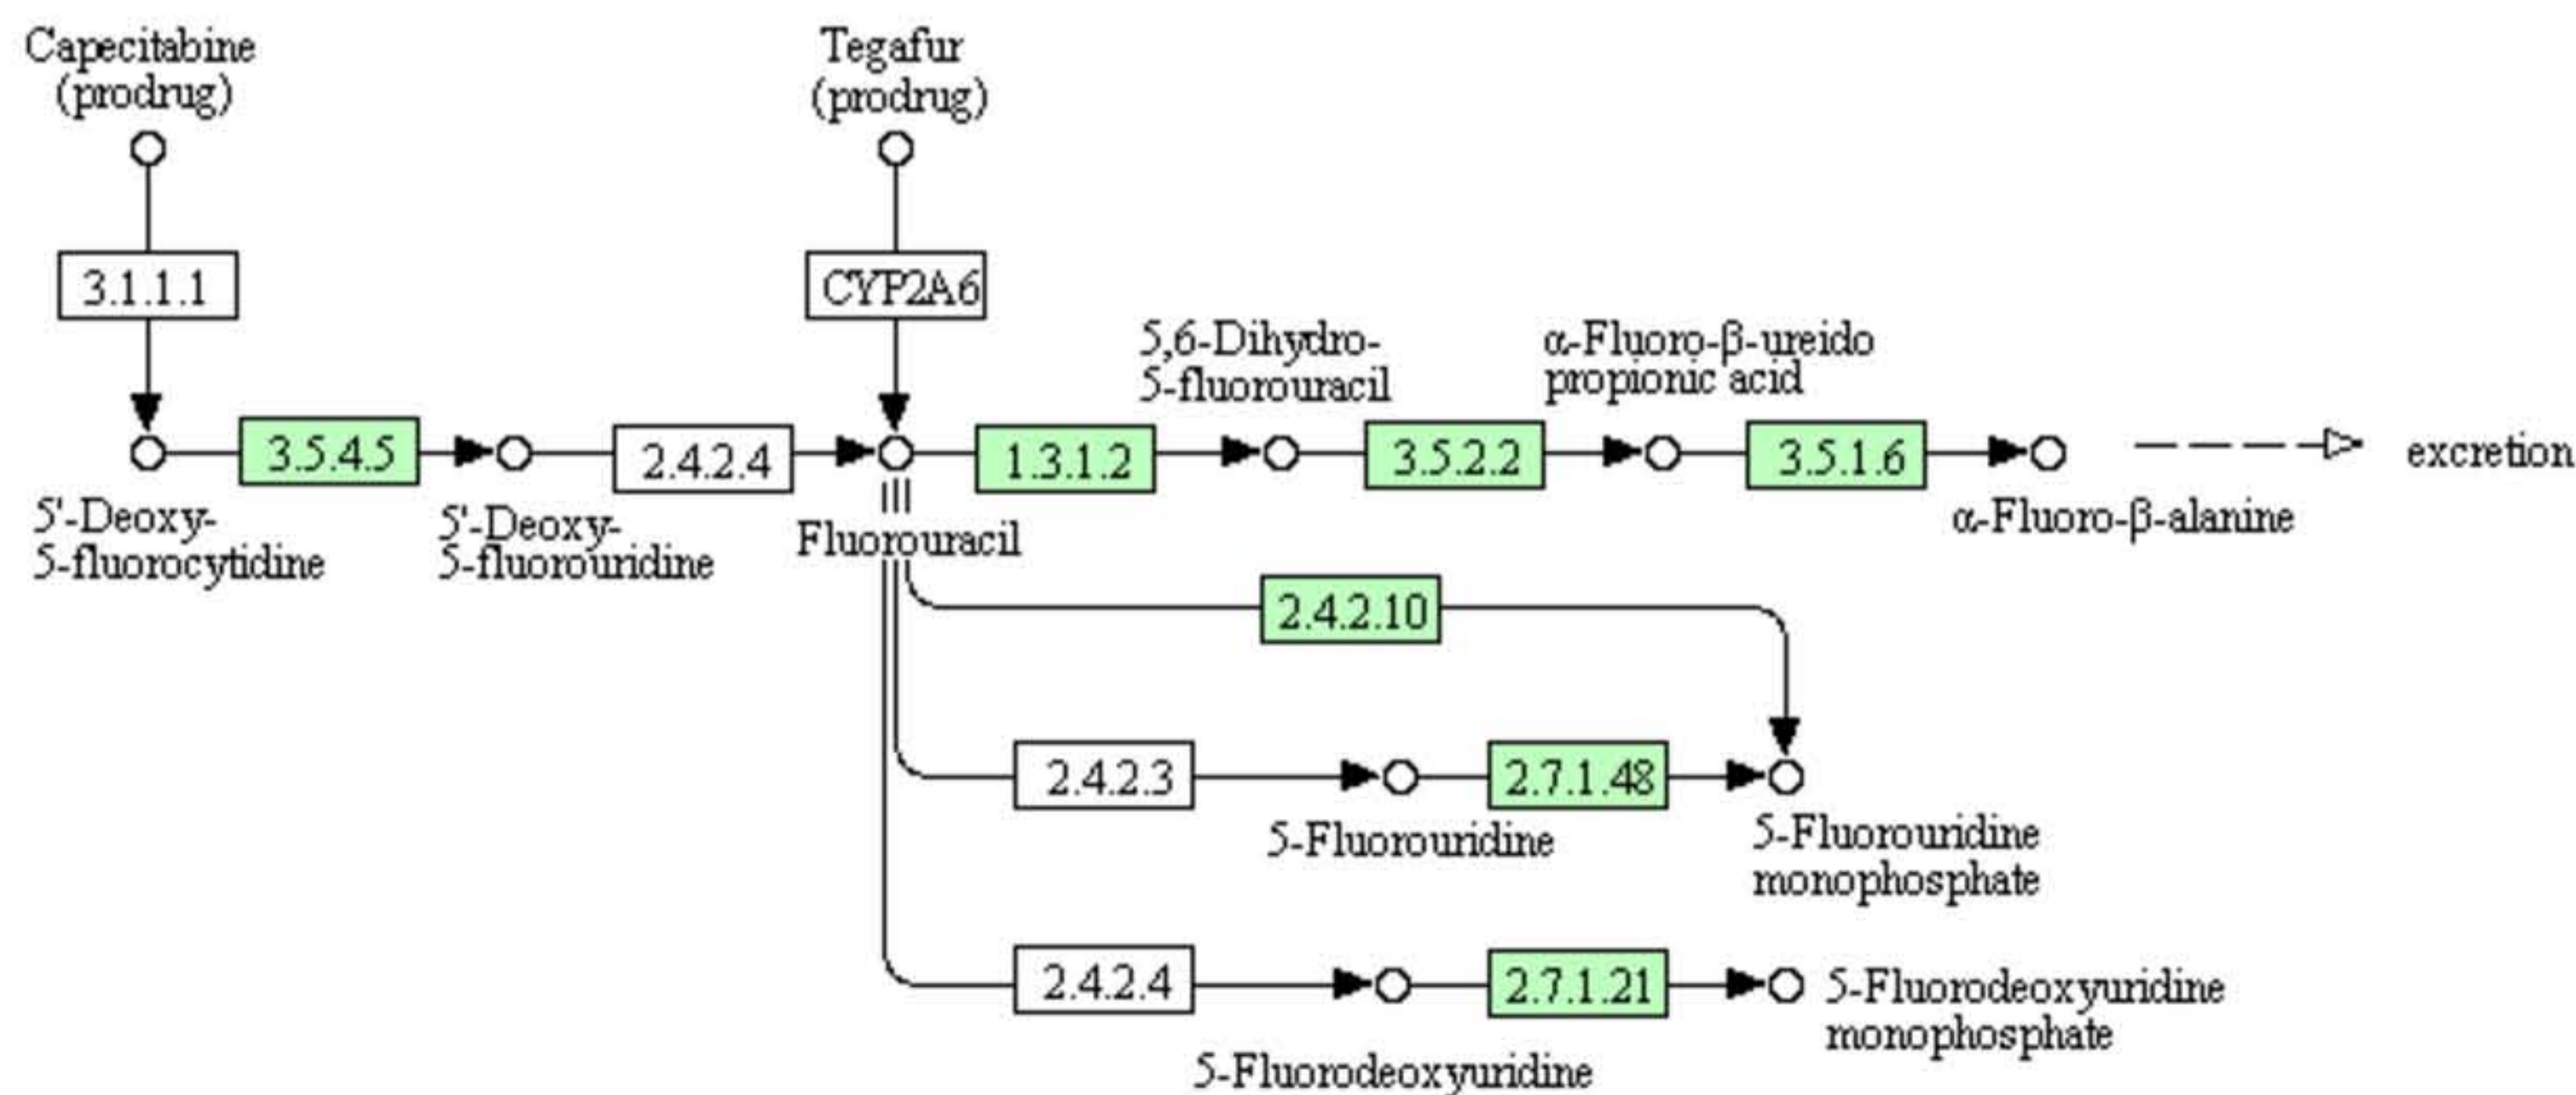

**Isoniazid**

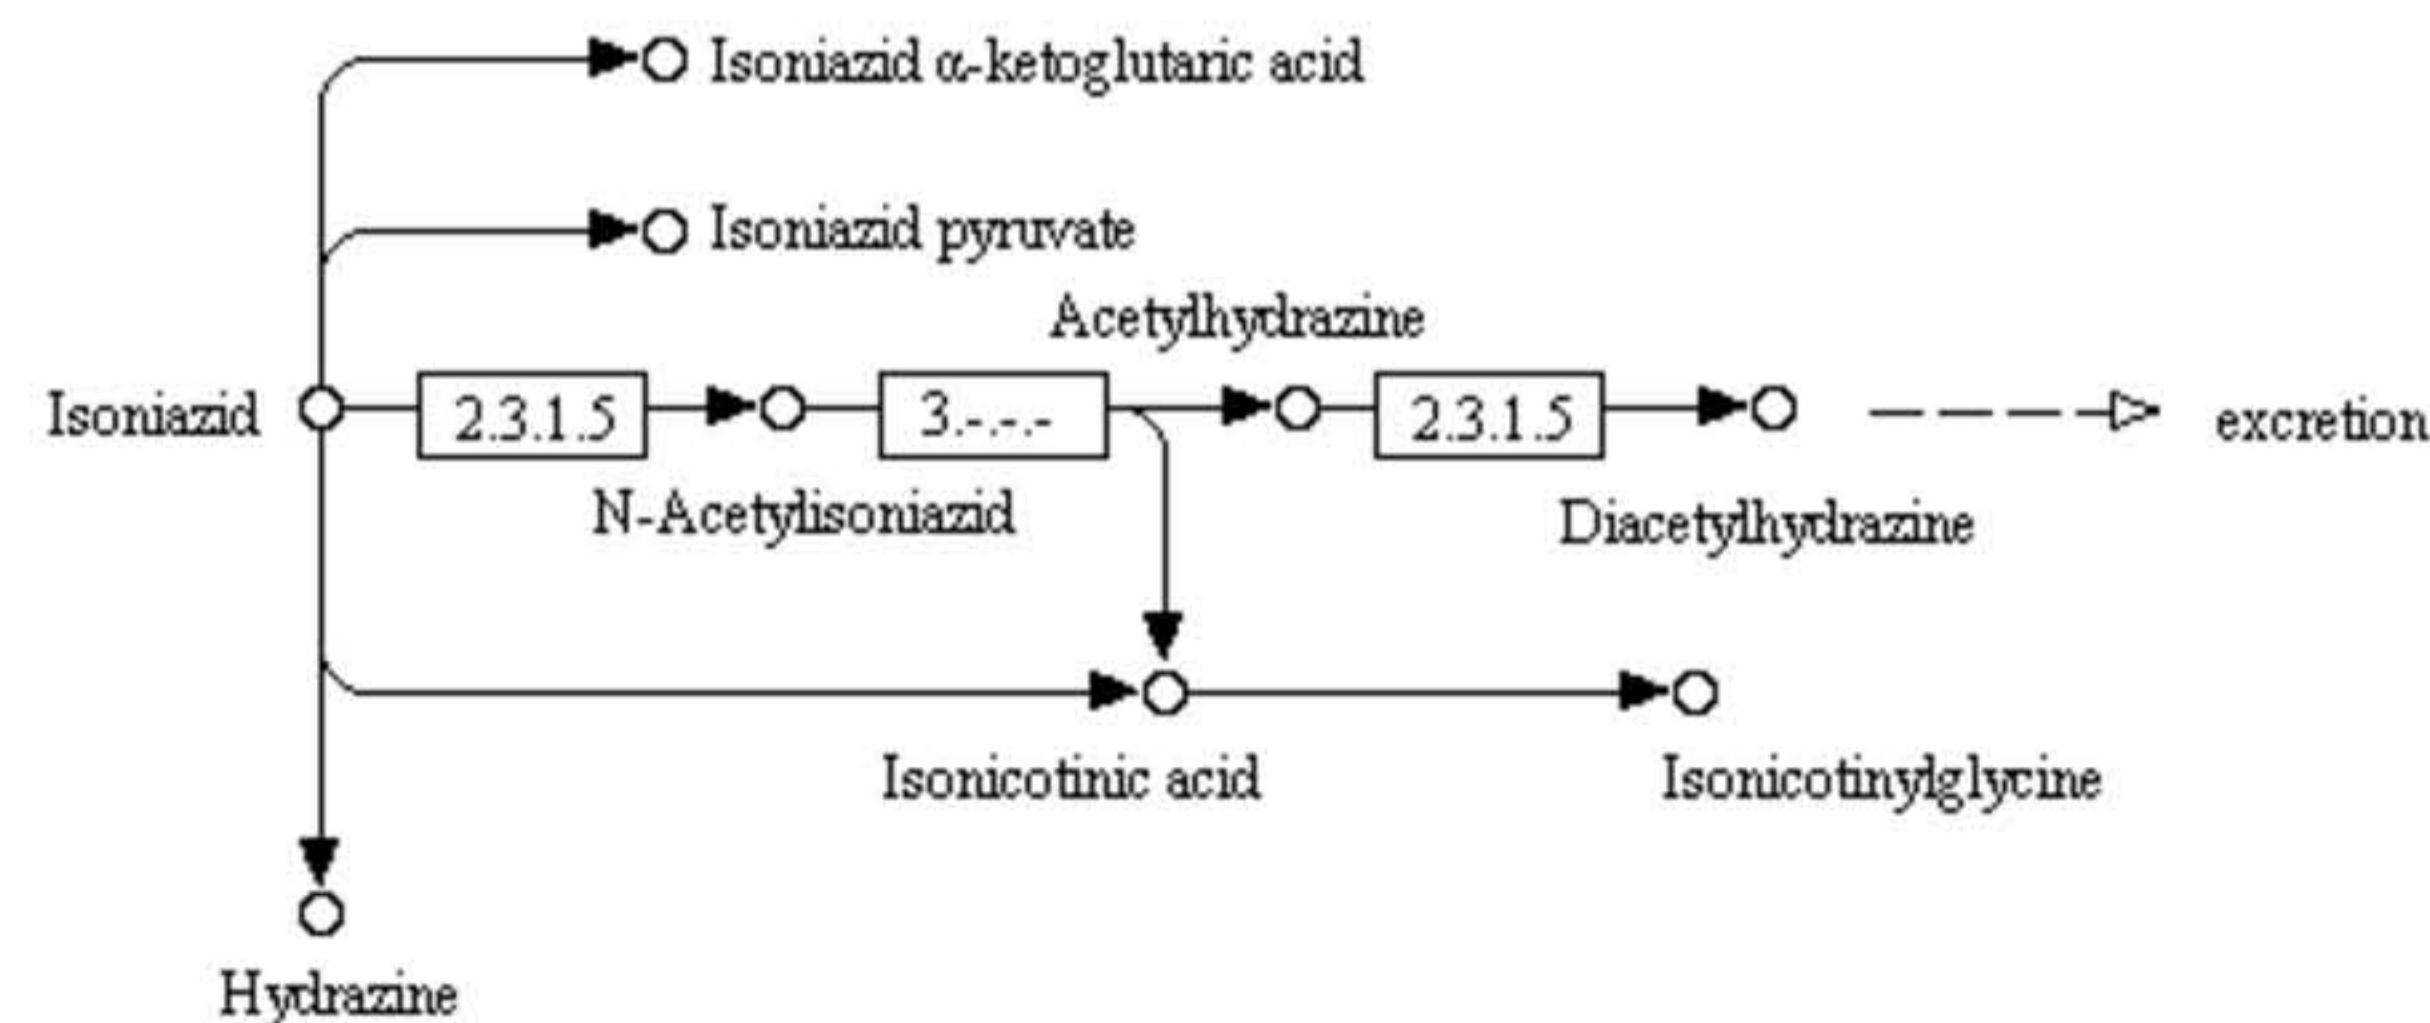



### Clathrin-dependent endocytosis

### Clathrin-independent endocytosis

#### ENDOCYTOSIS

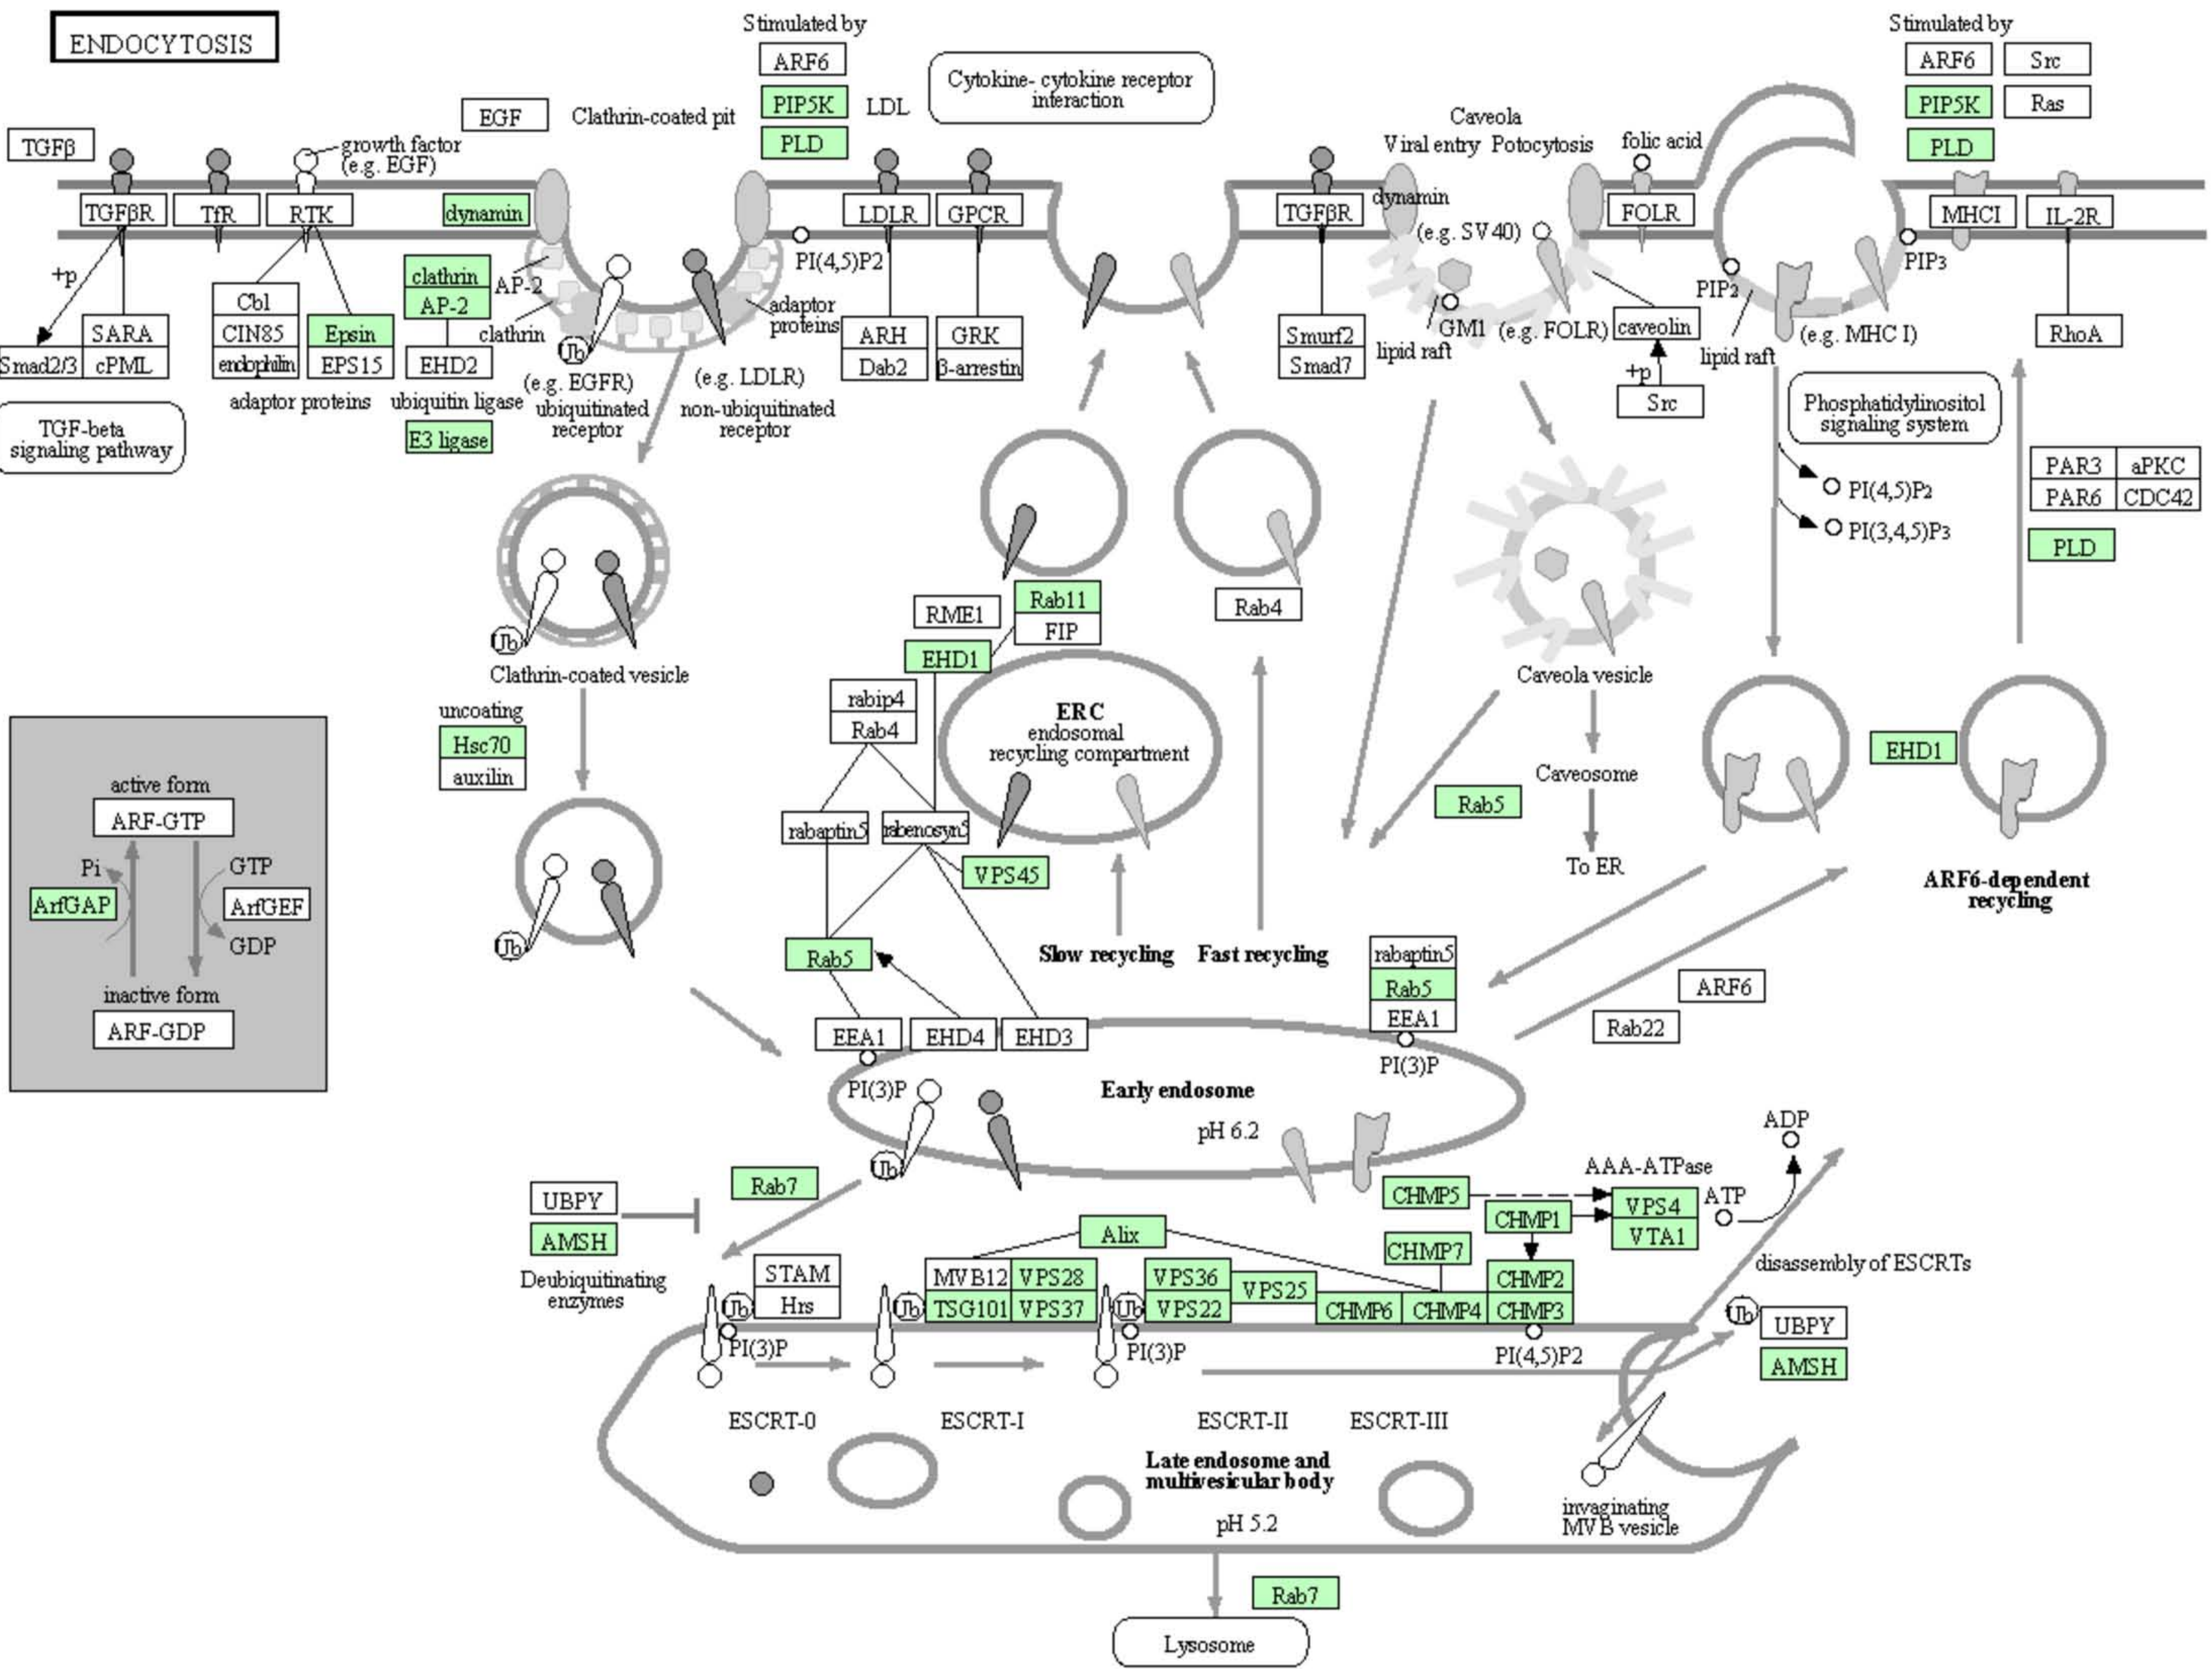



# ERBB SIGNALING PATHWAY

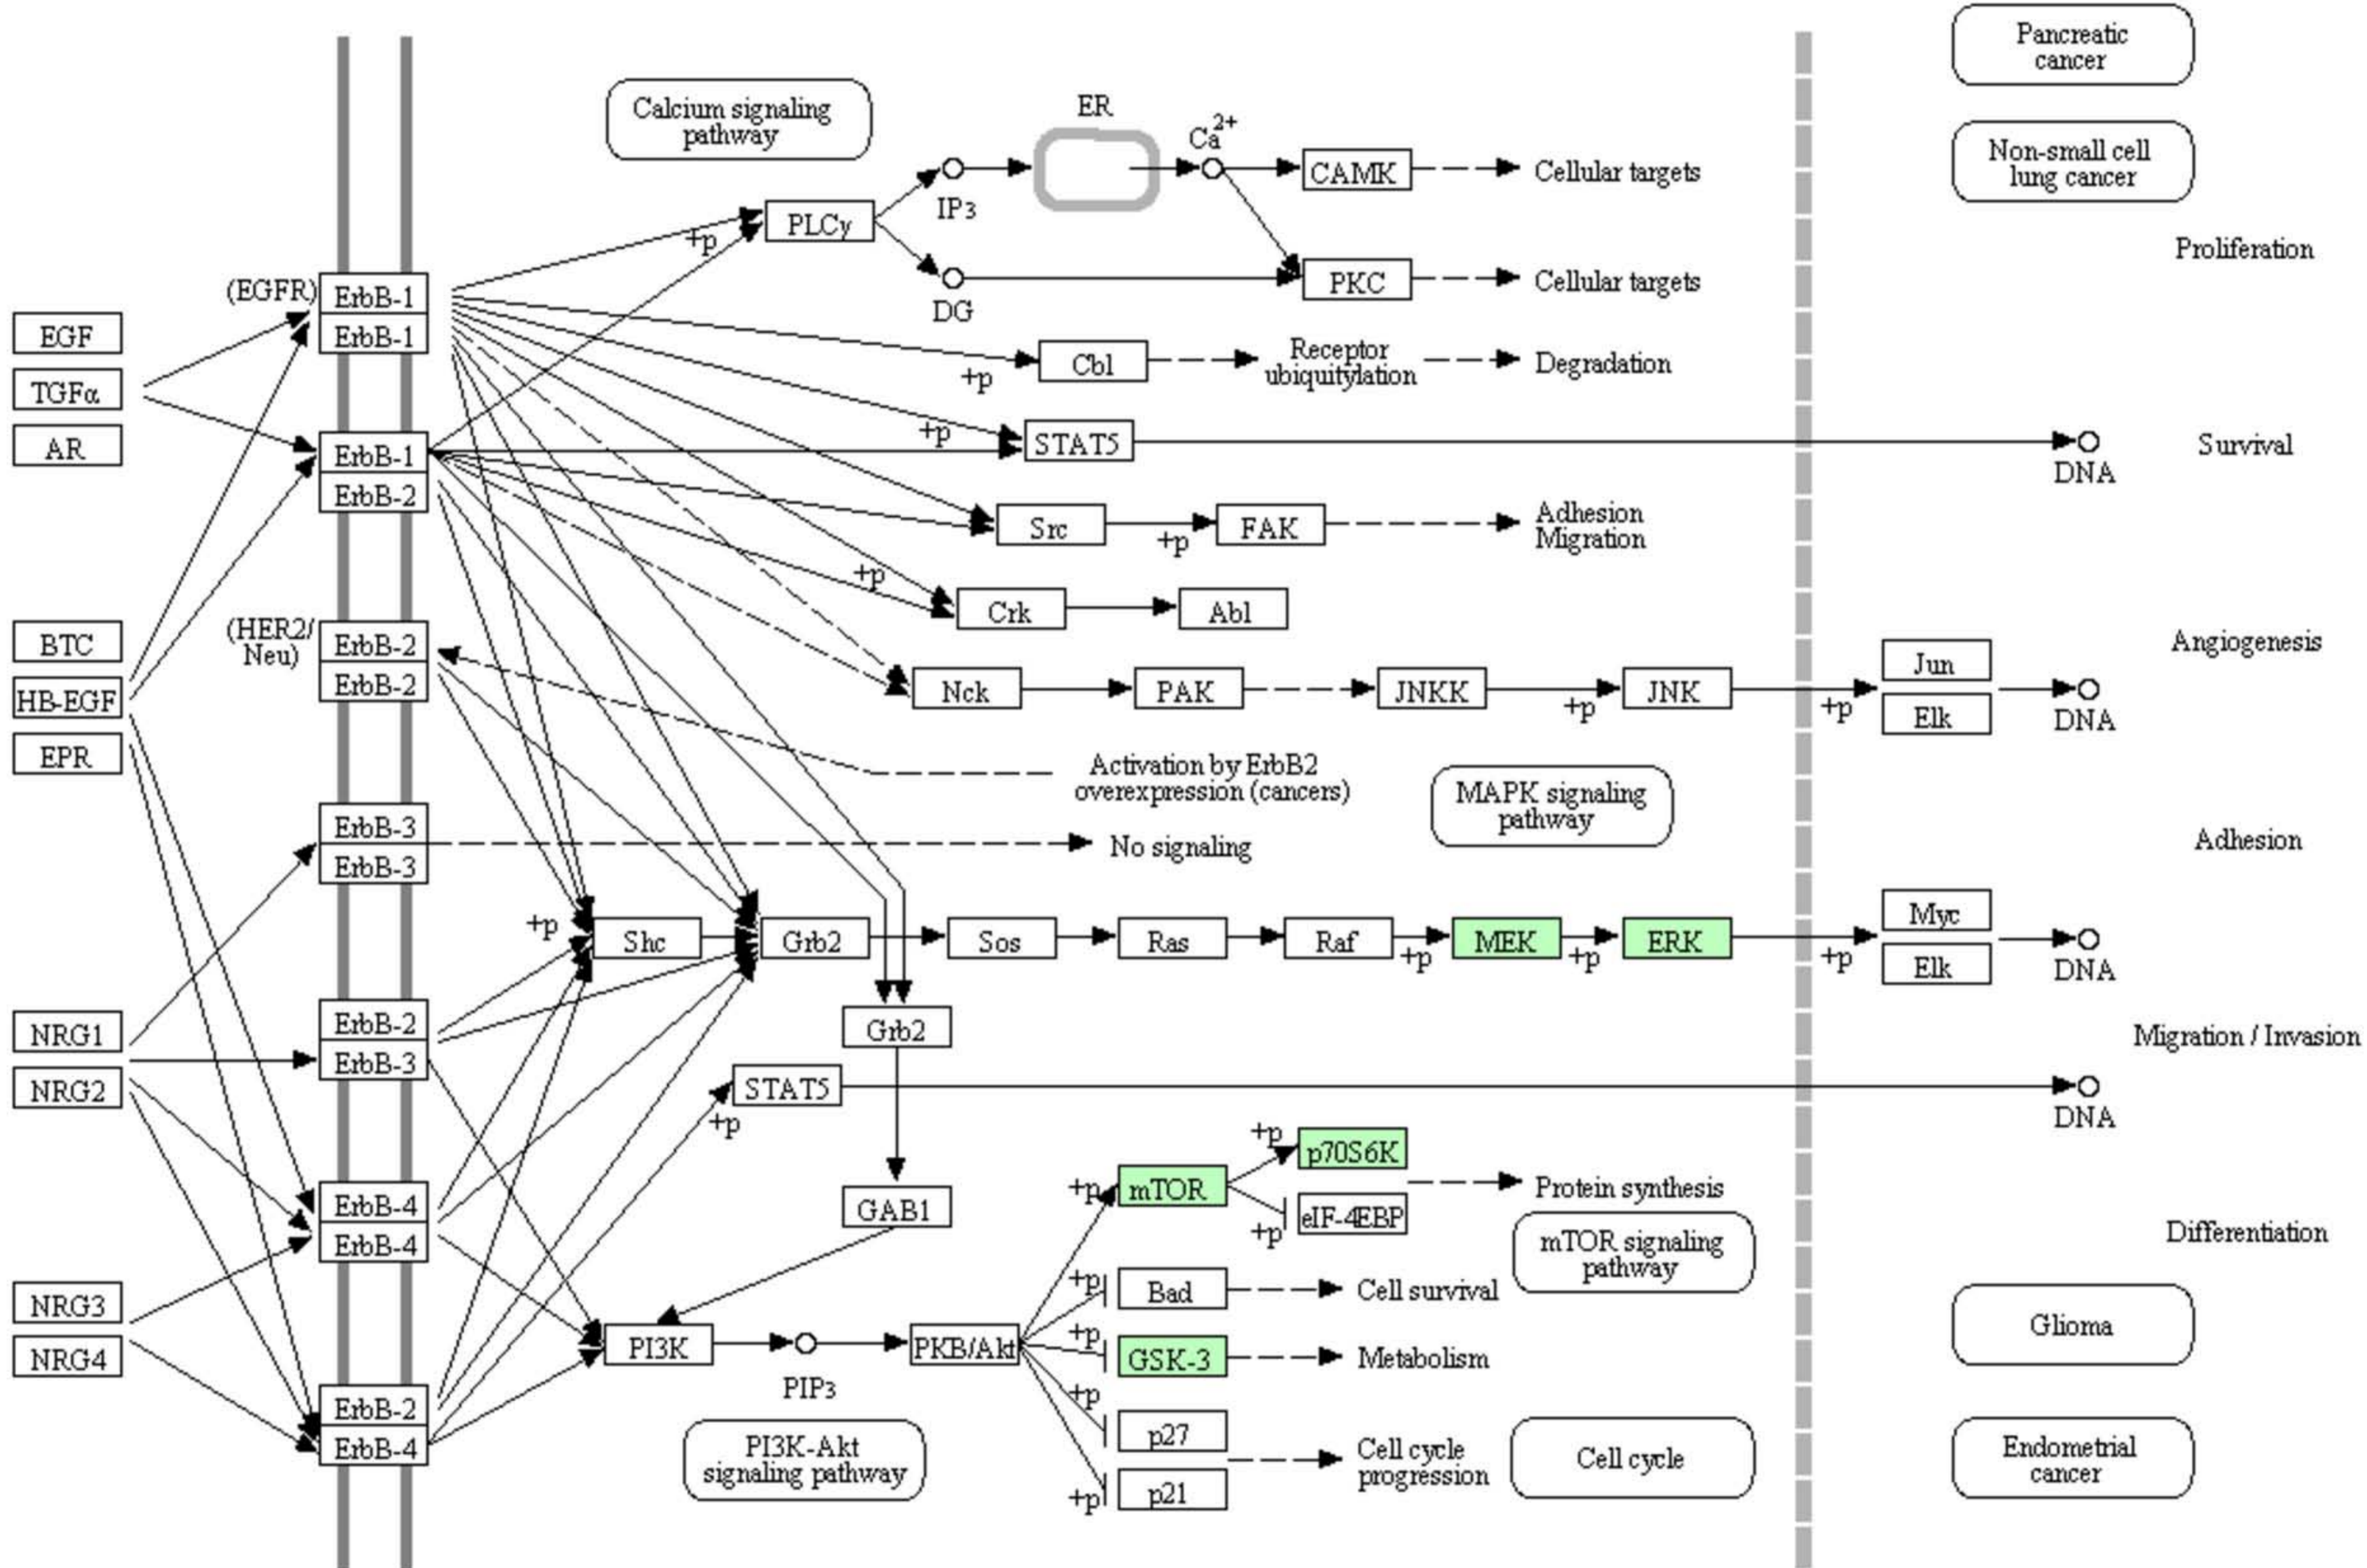



# ETHER LIPID METABOLISM

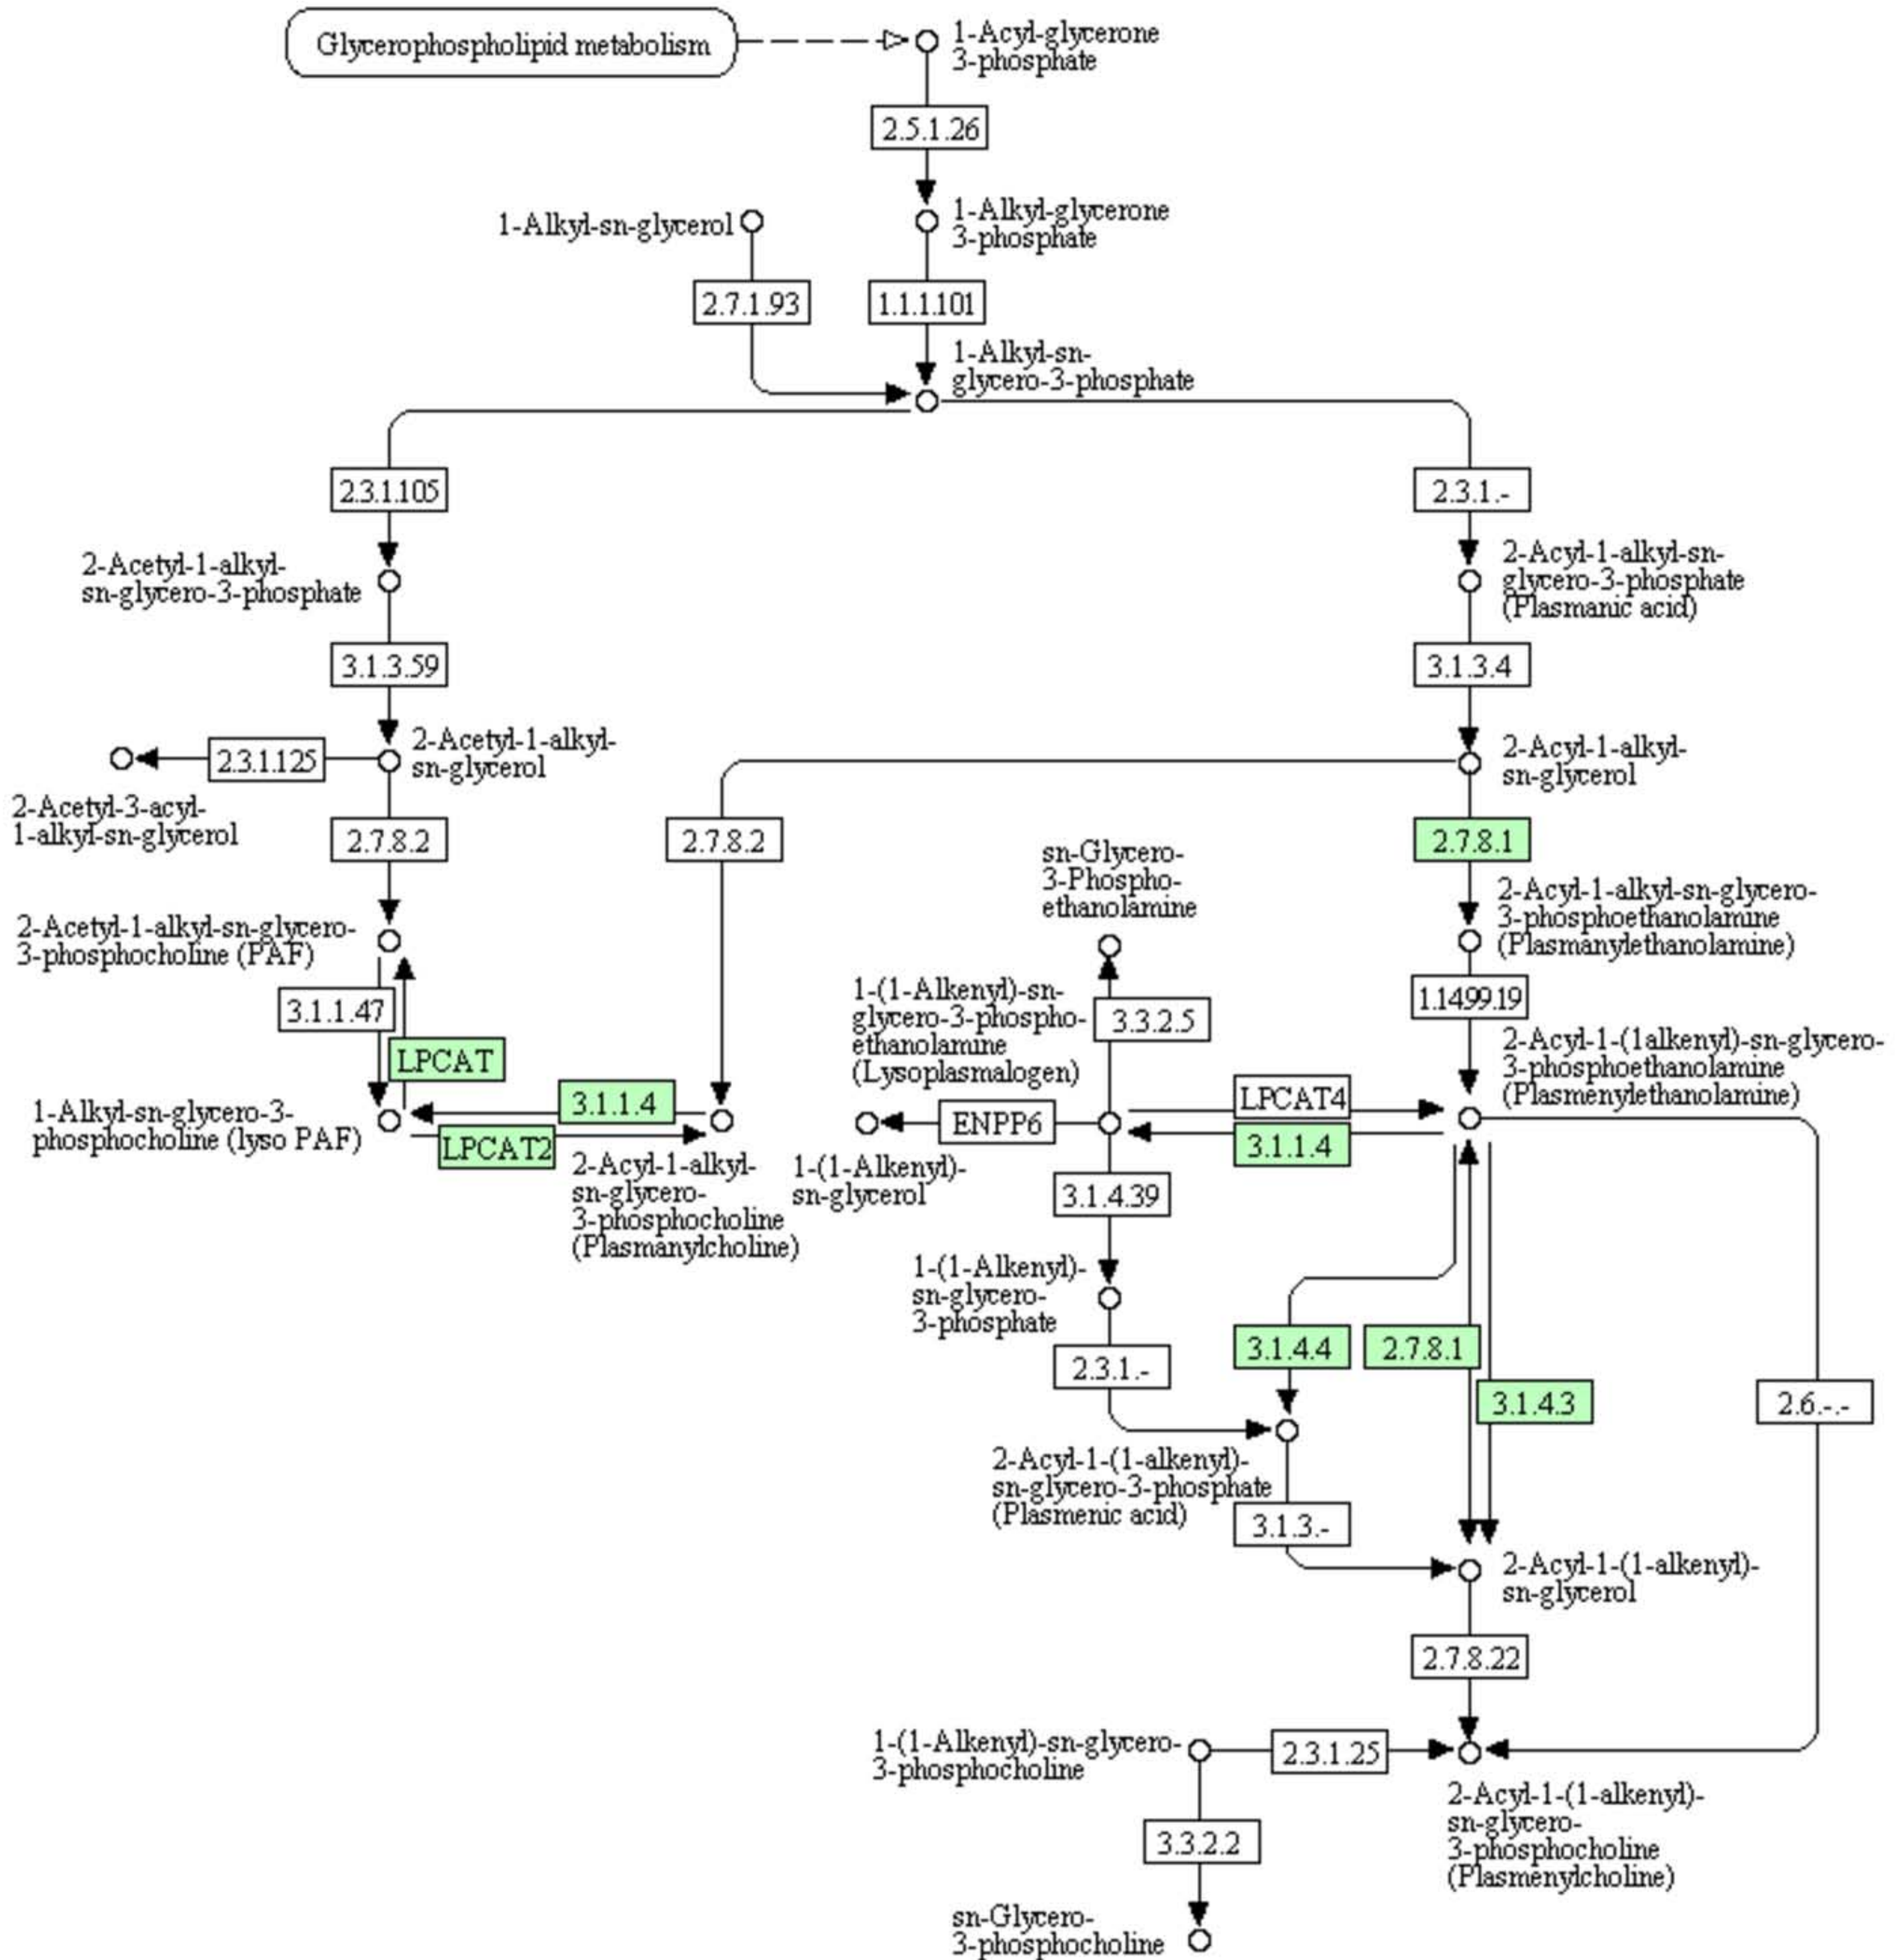



# FATTY ACID BIOSYNTHESIS

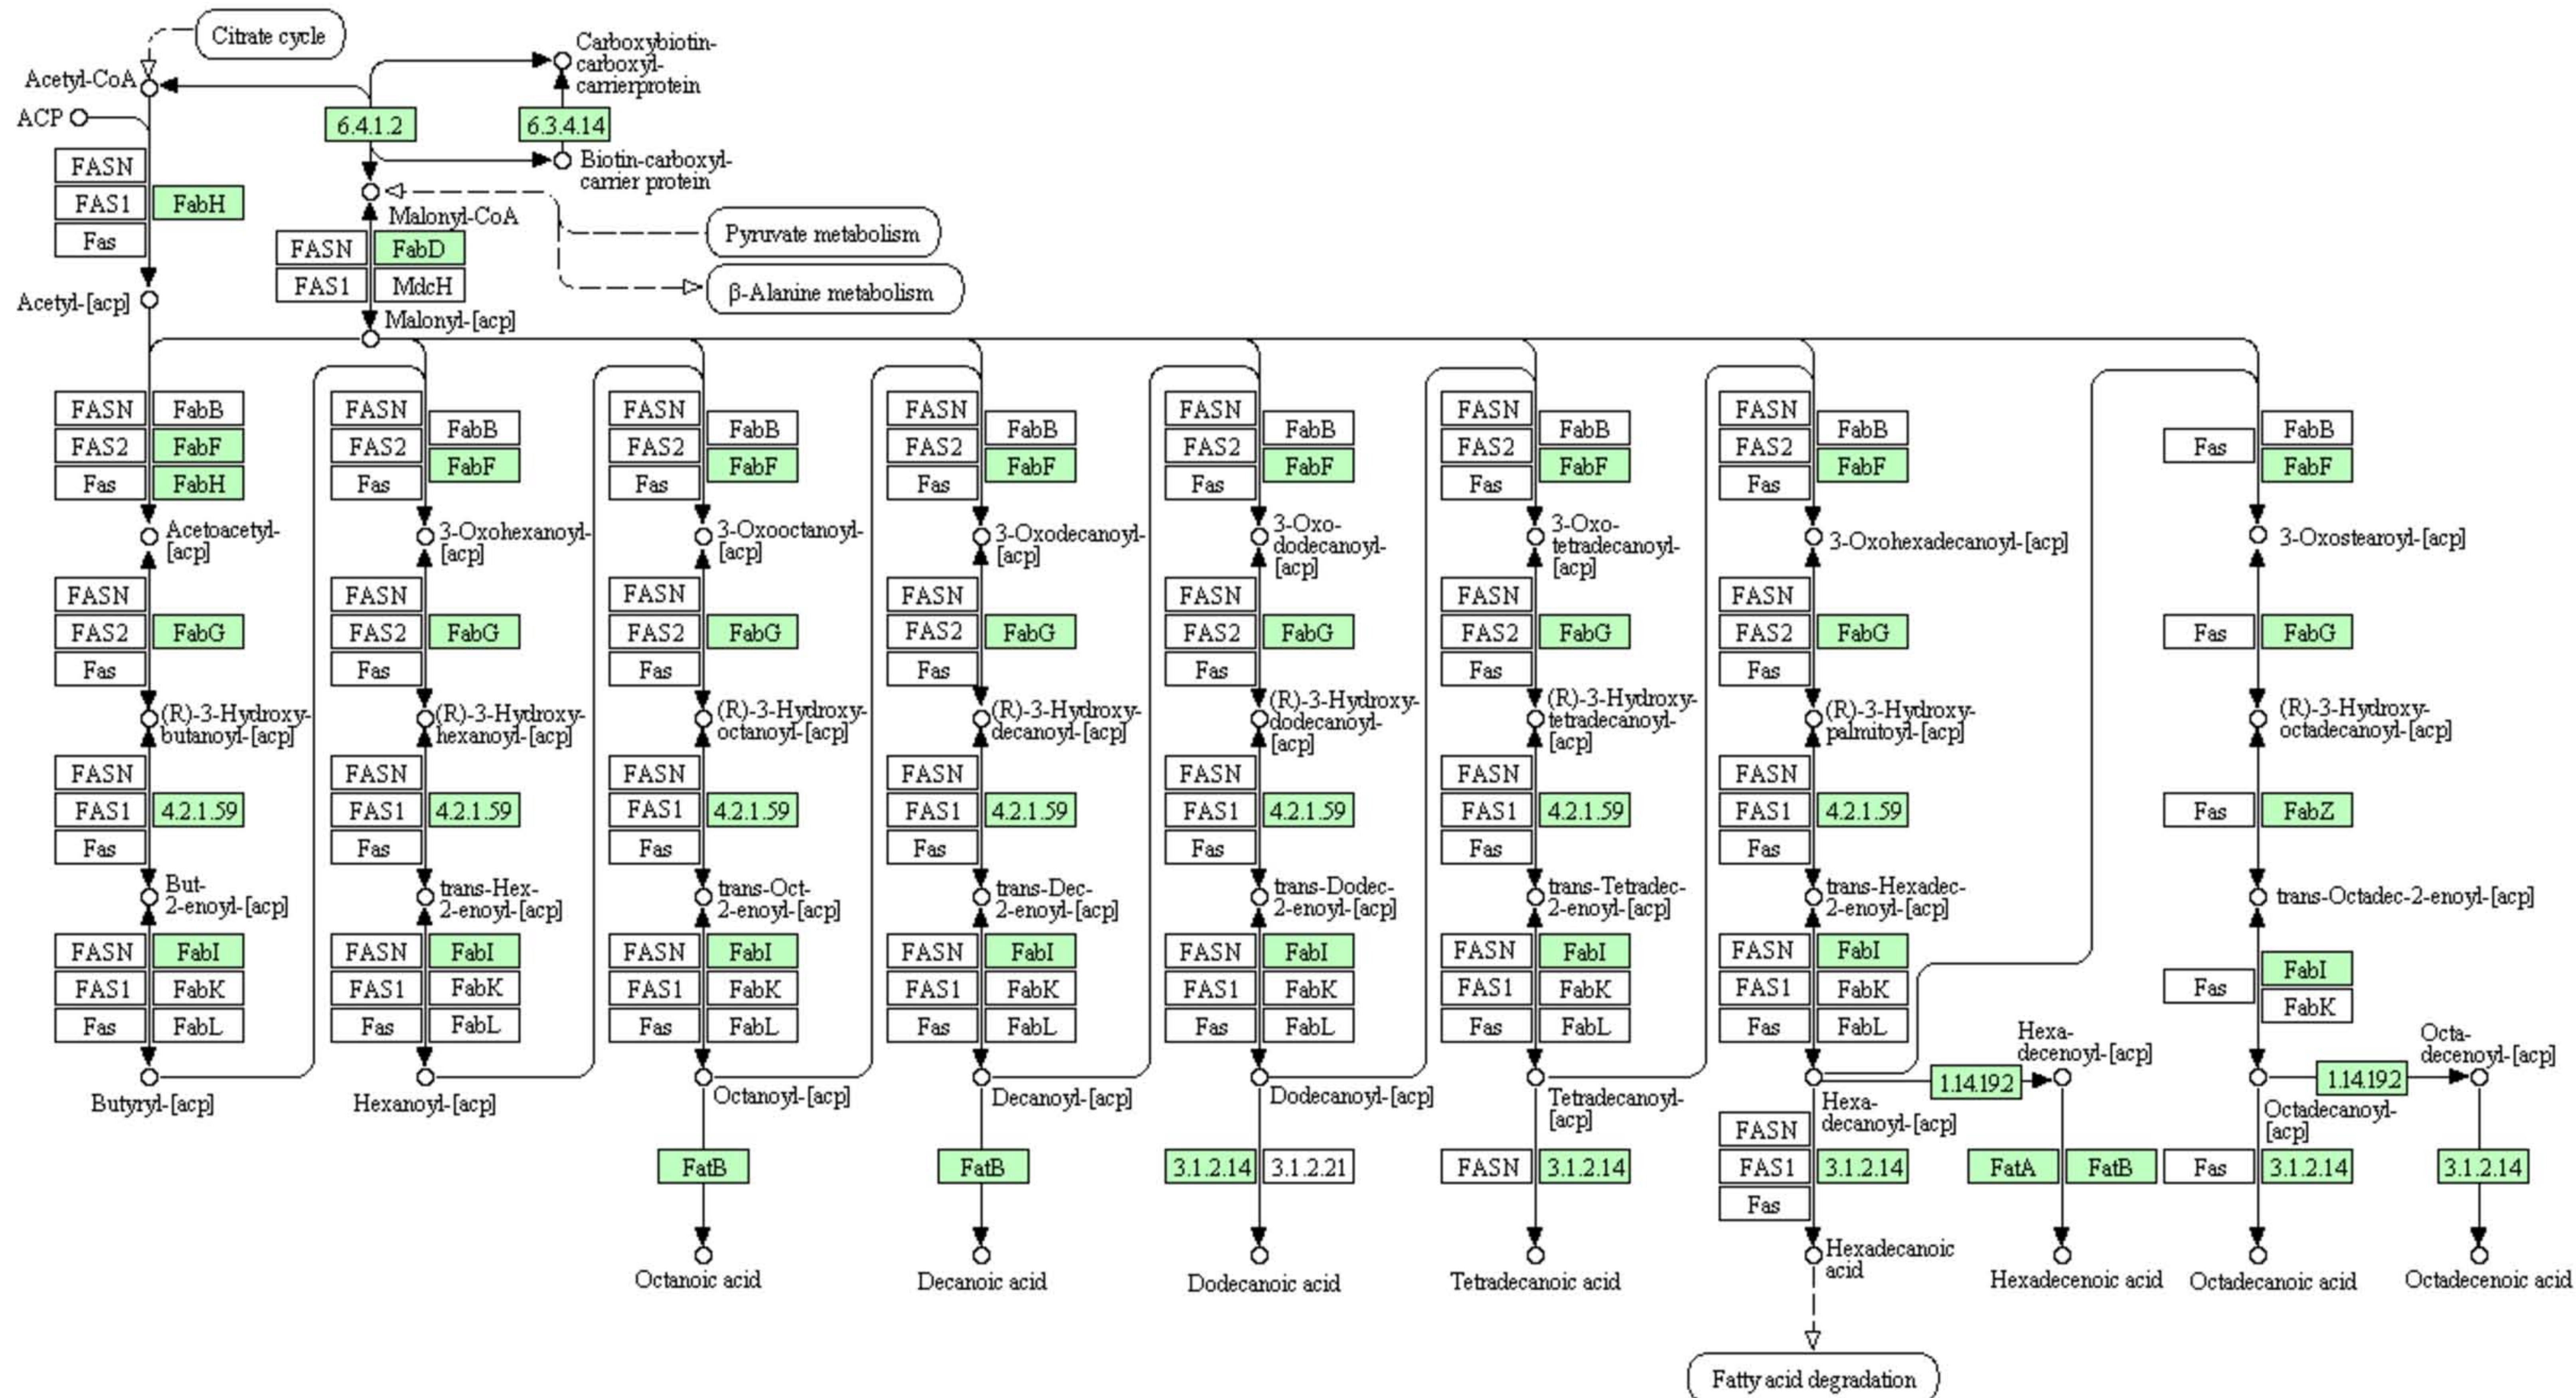



# FATTY ACID DEGRADATION

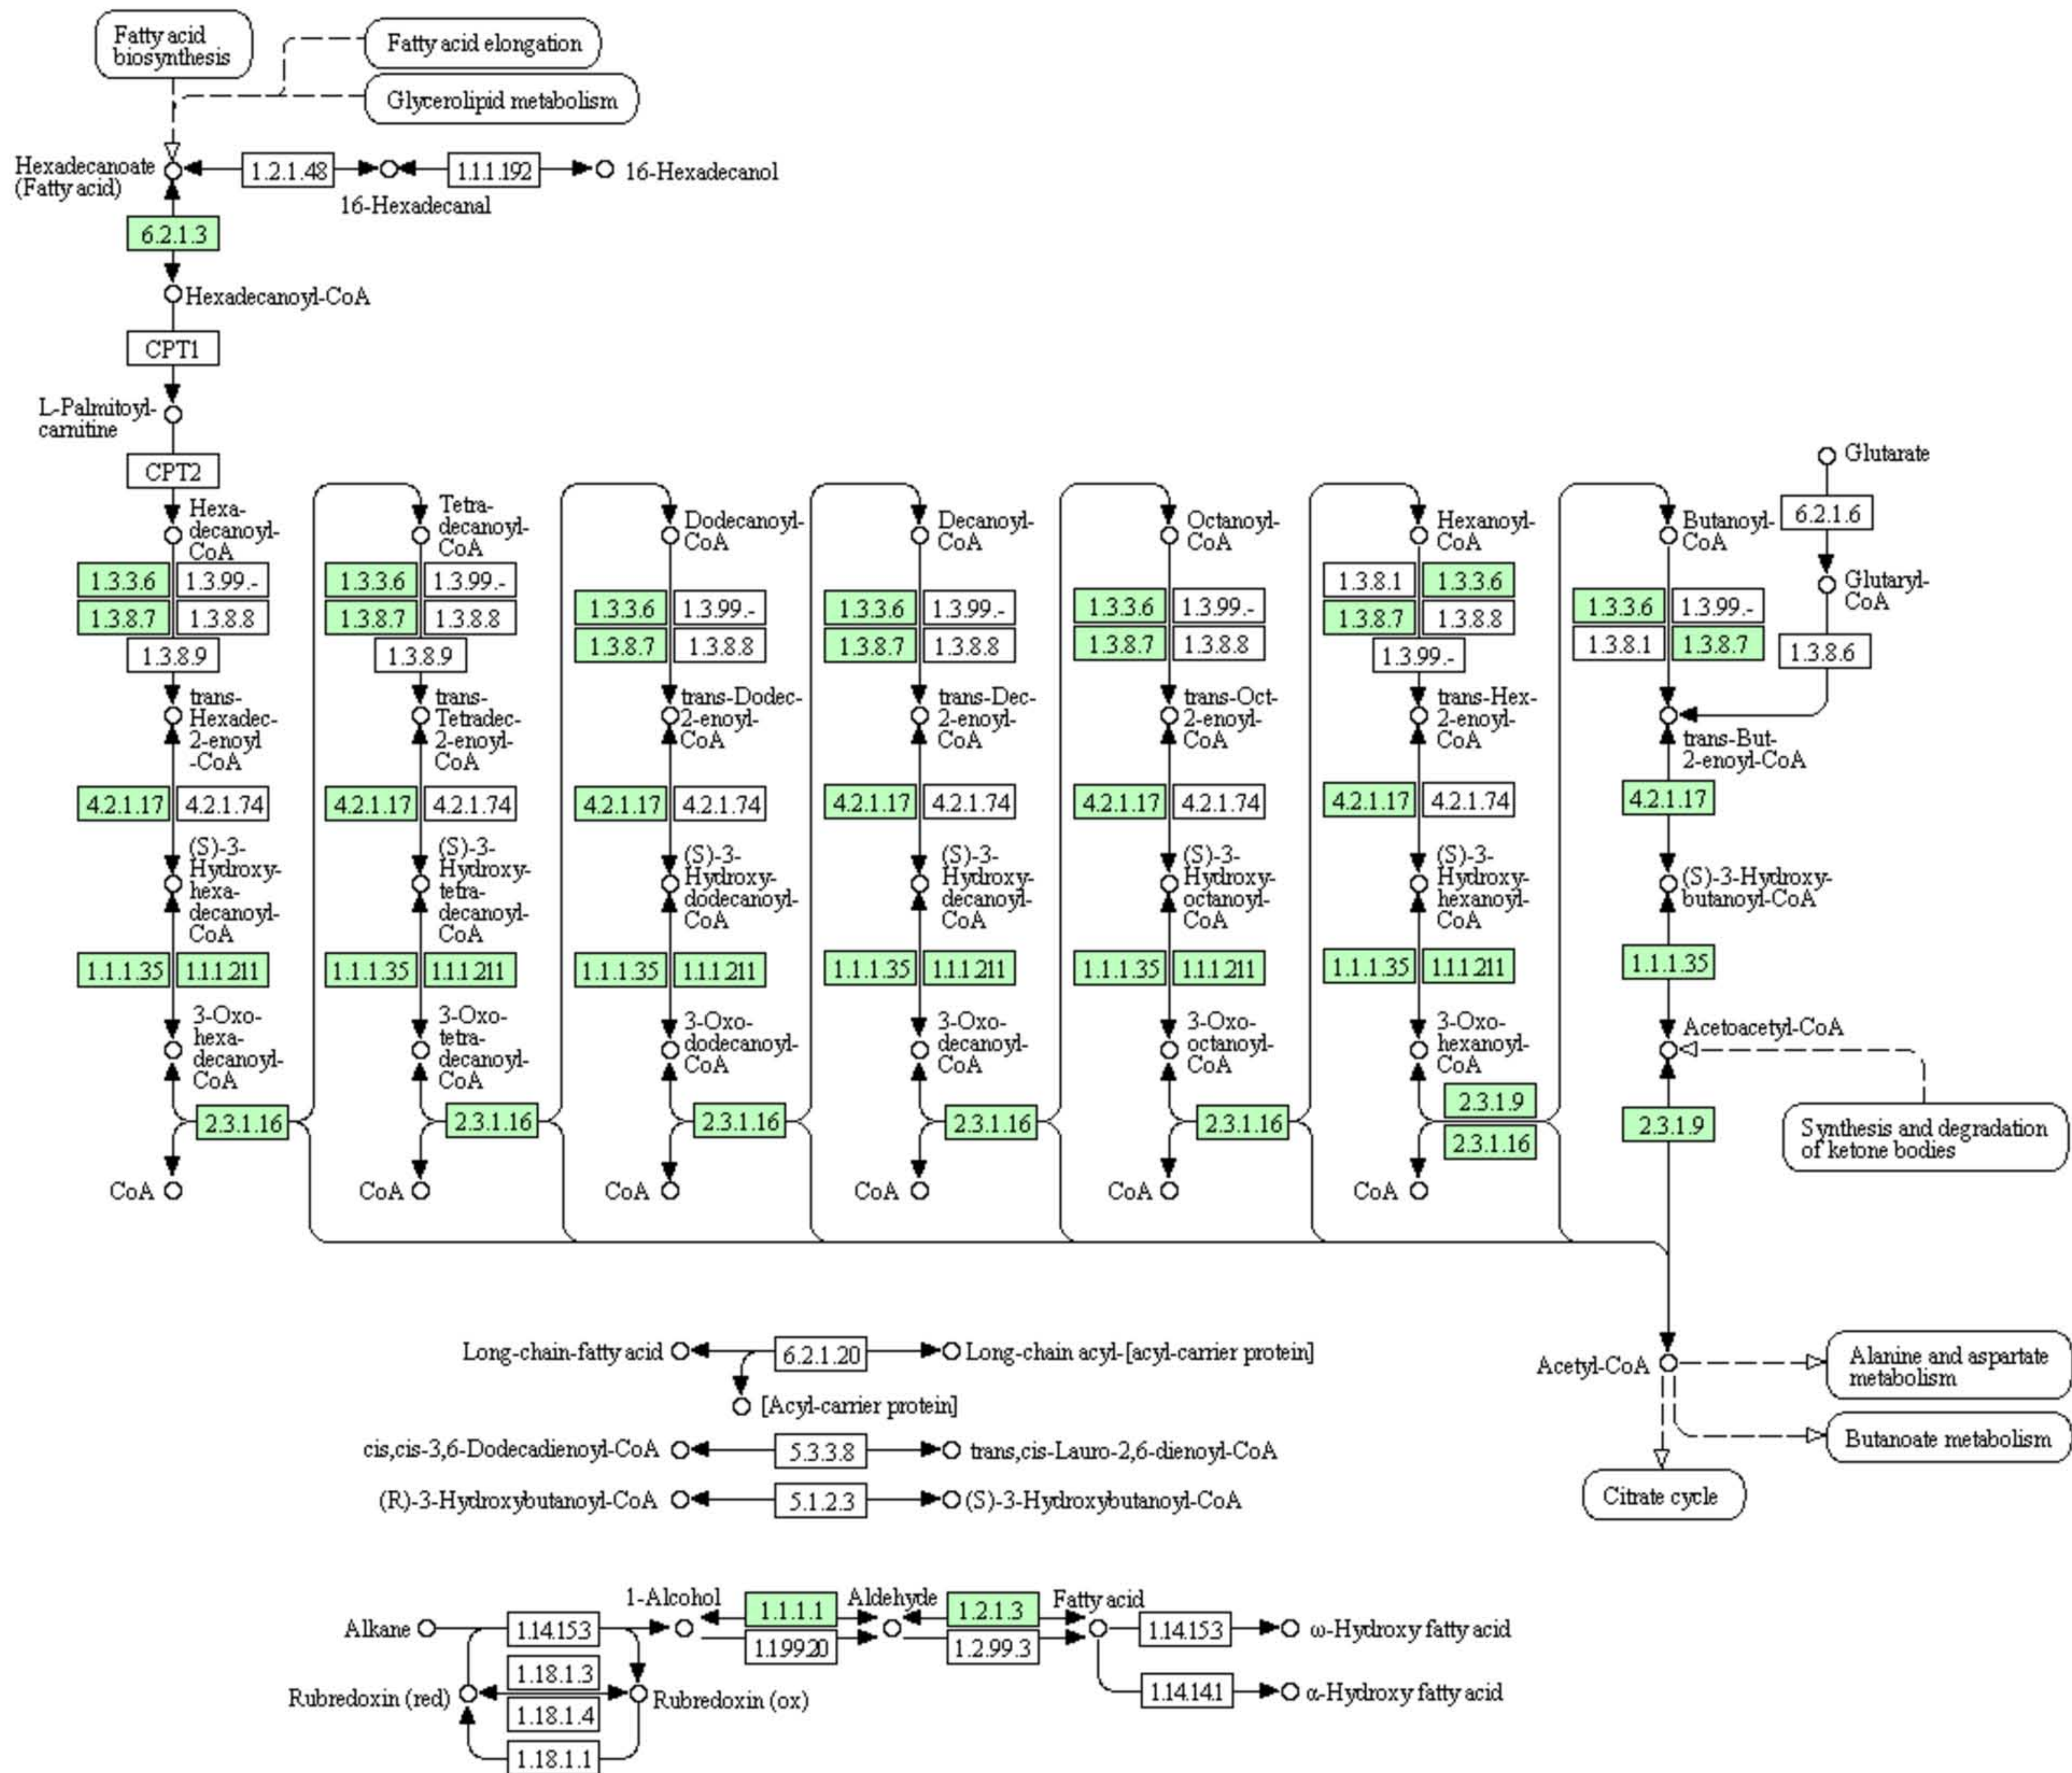



# FATTY ACID ELONGATION

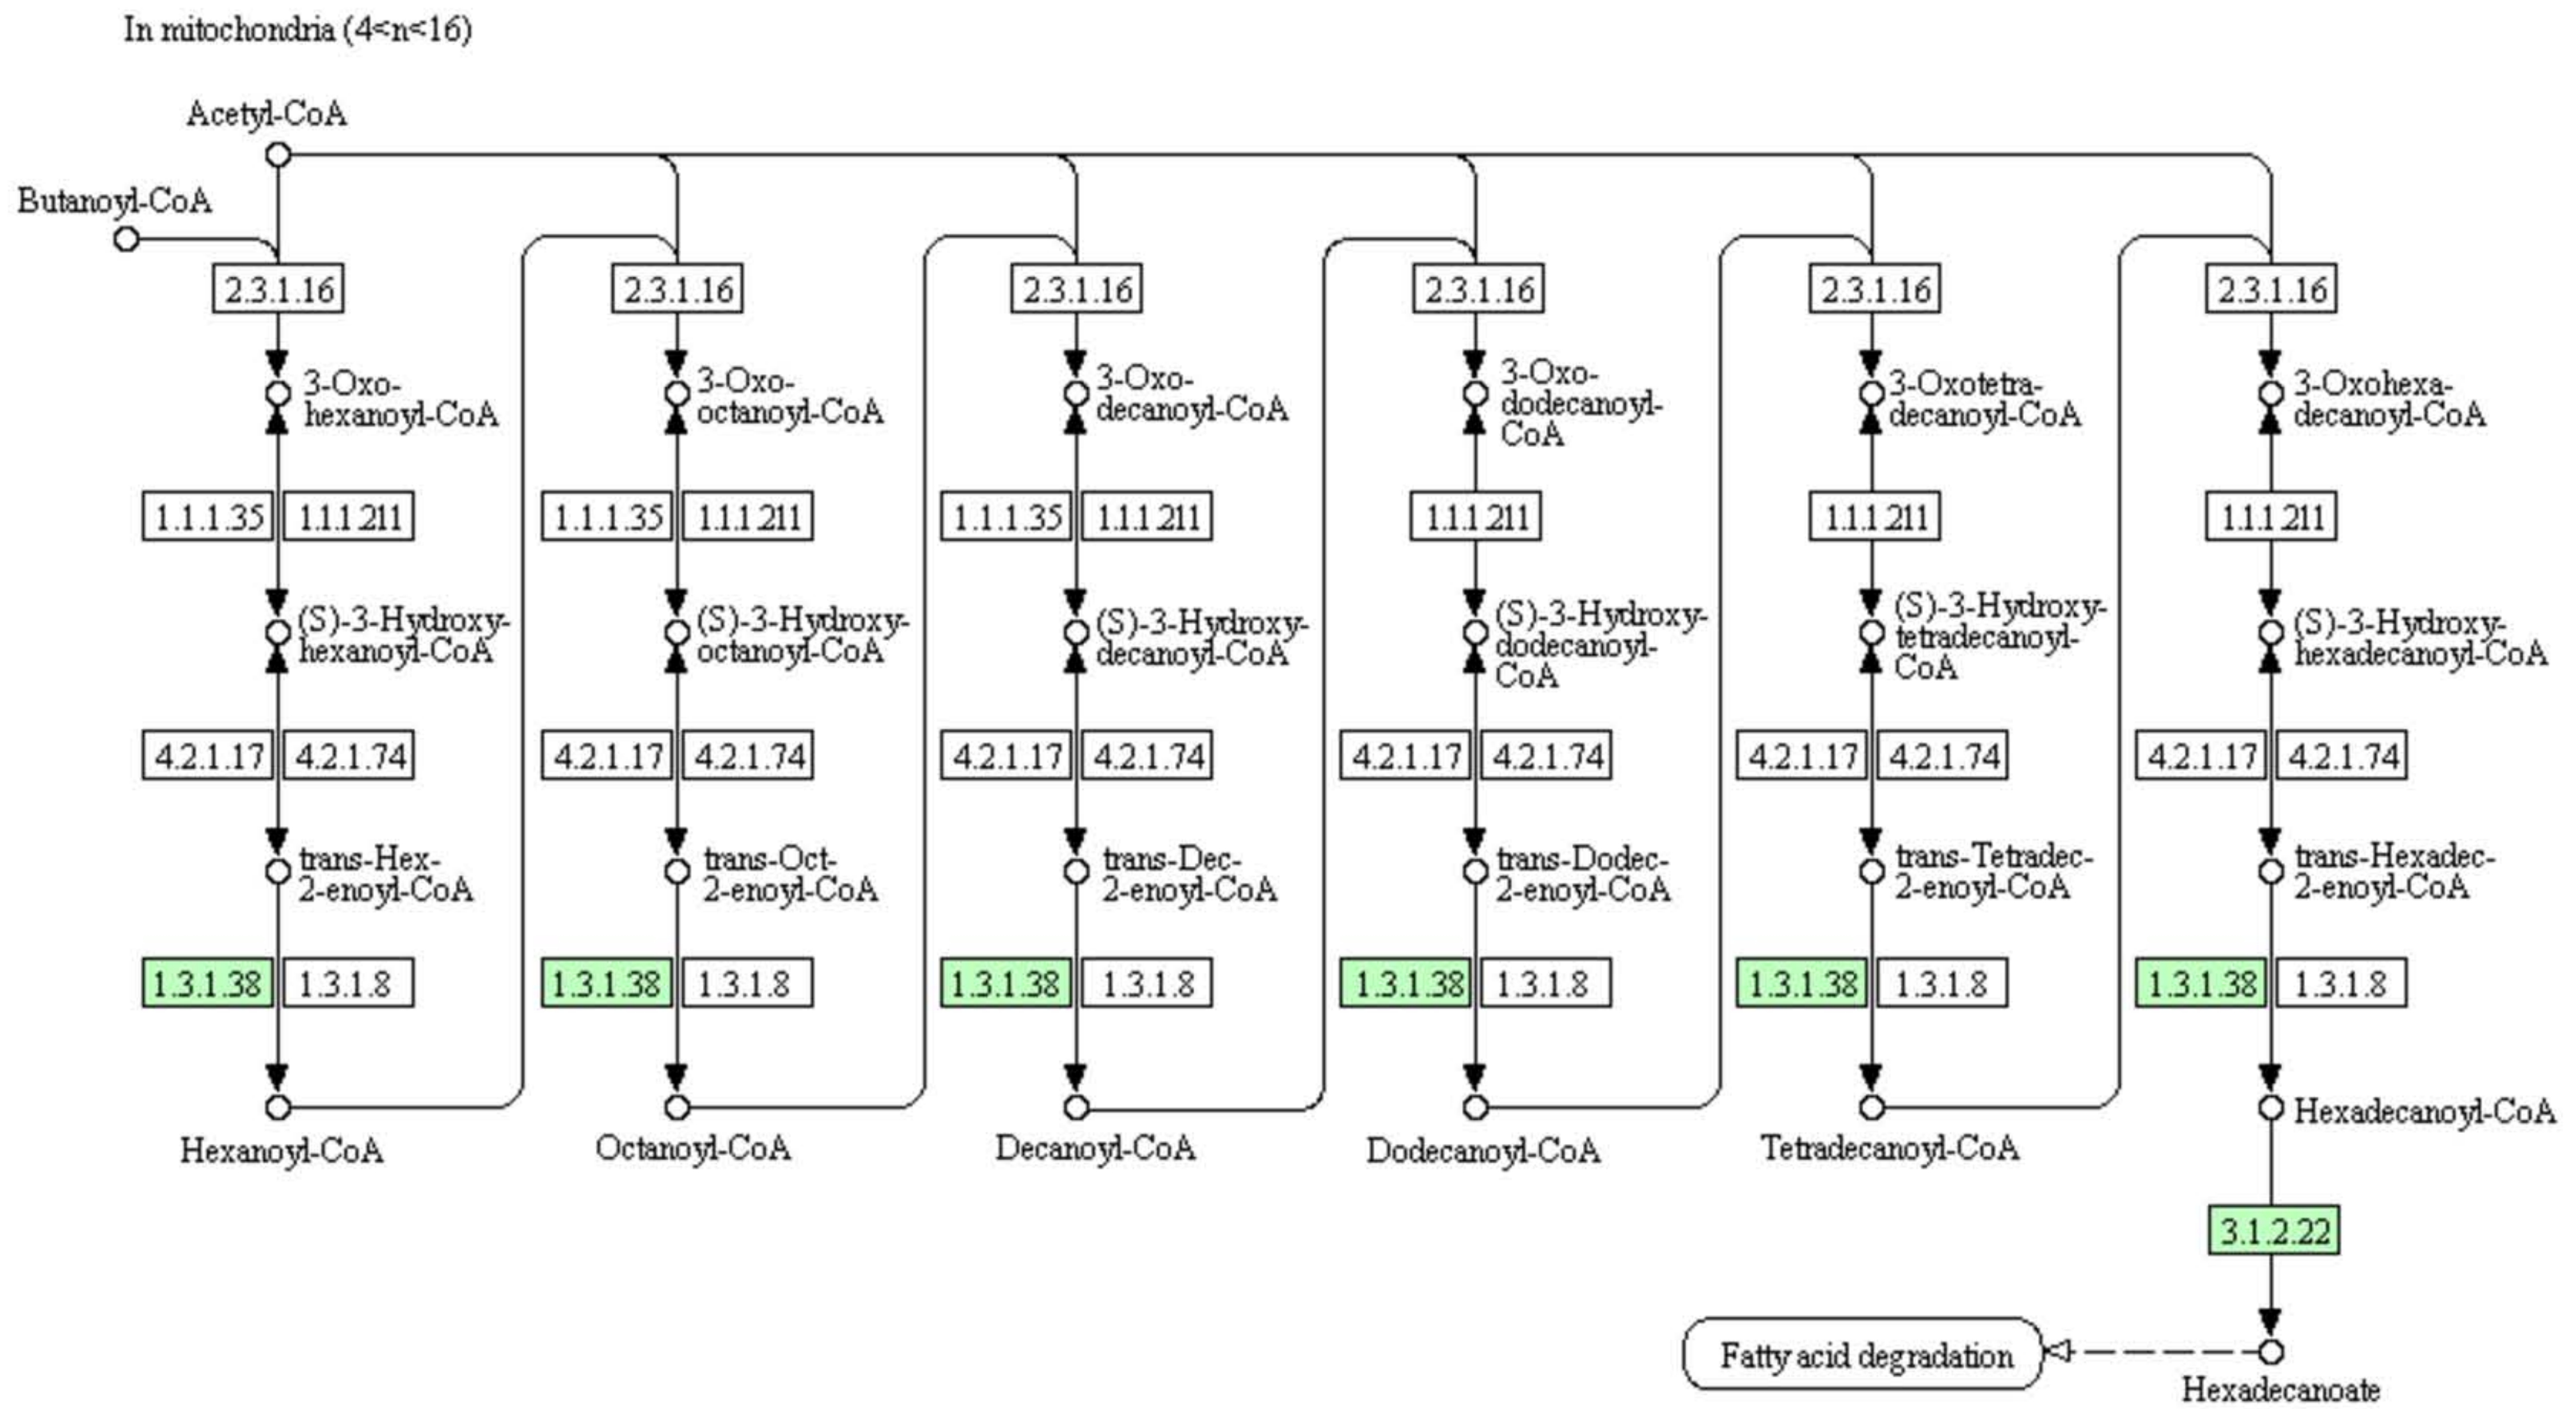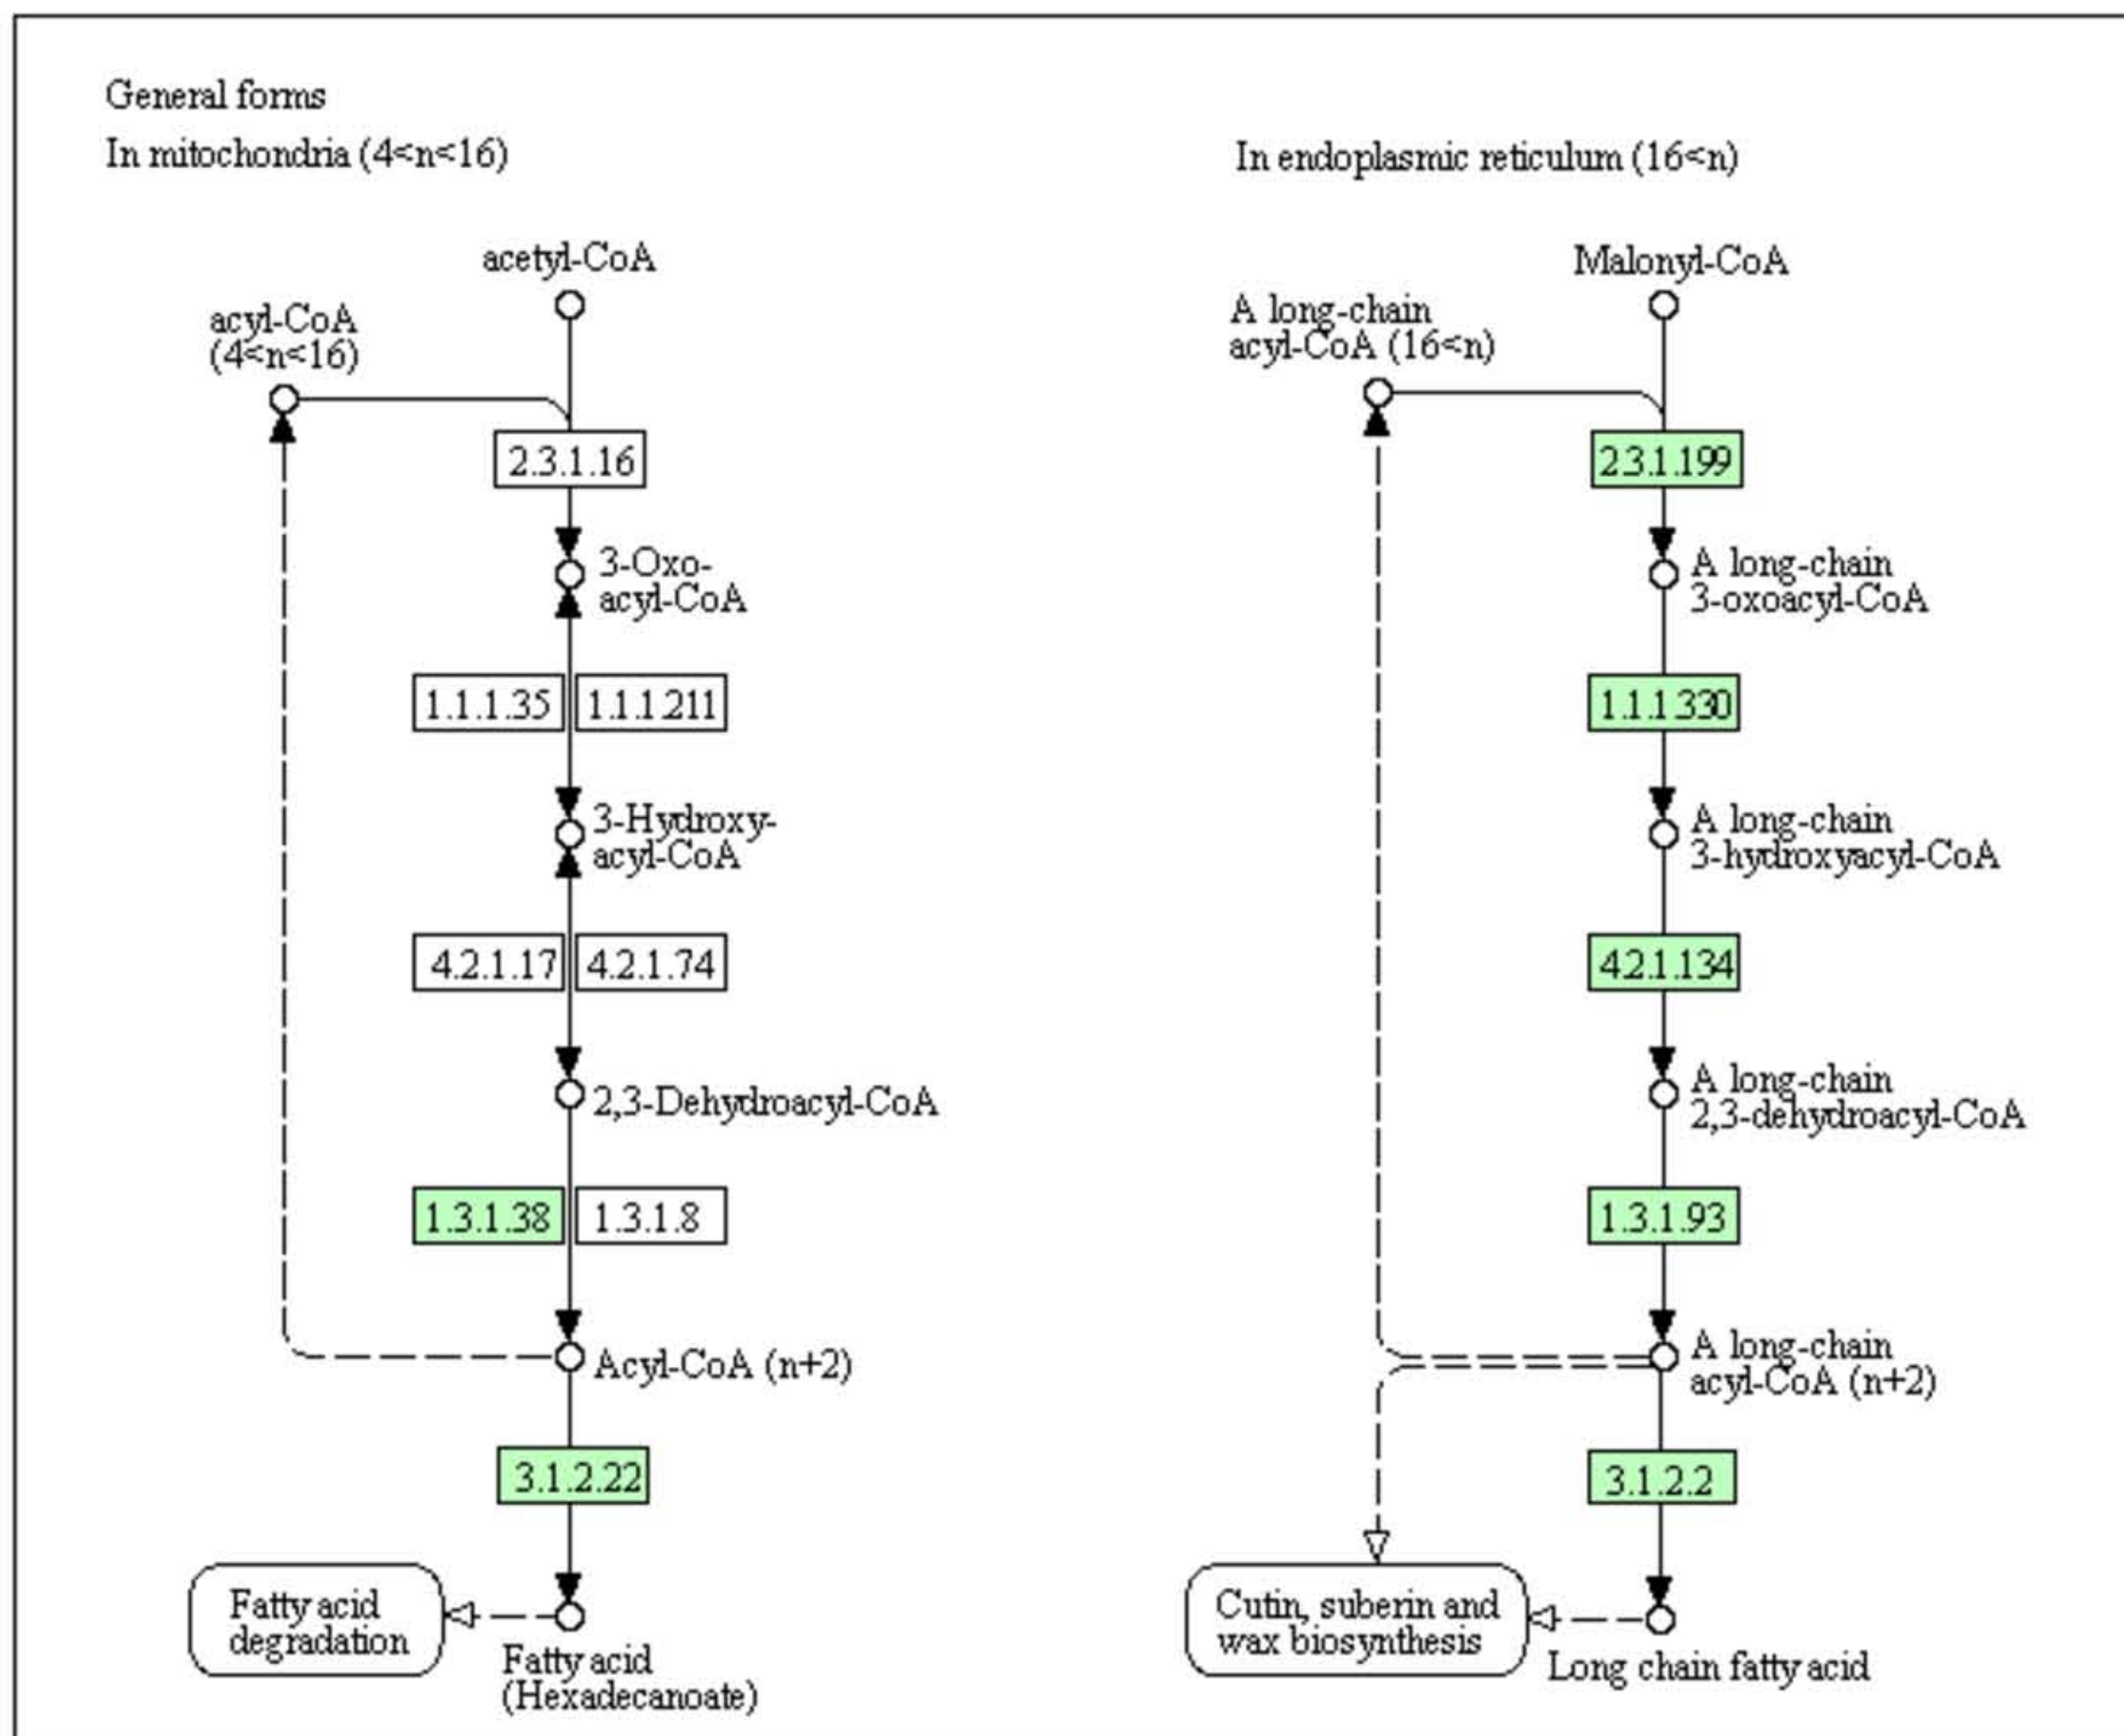



**FATTY ACID METABOLISM**

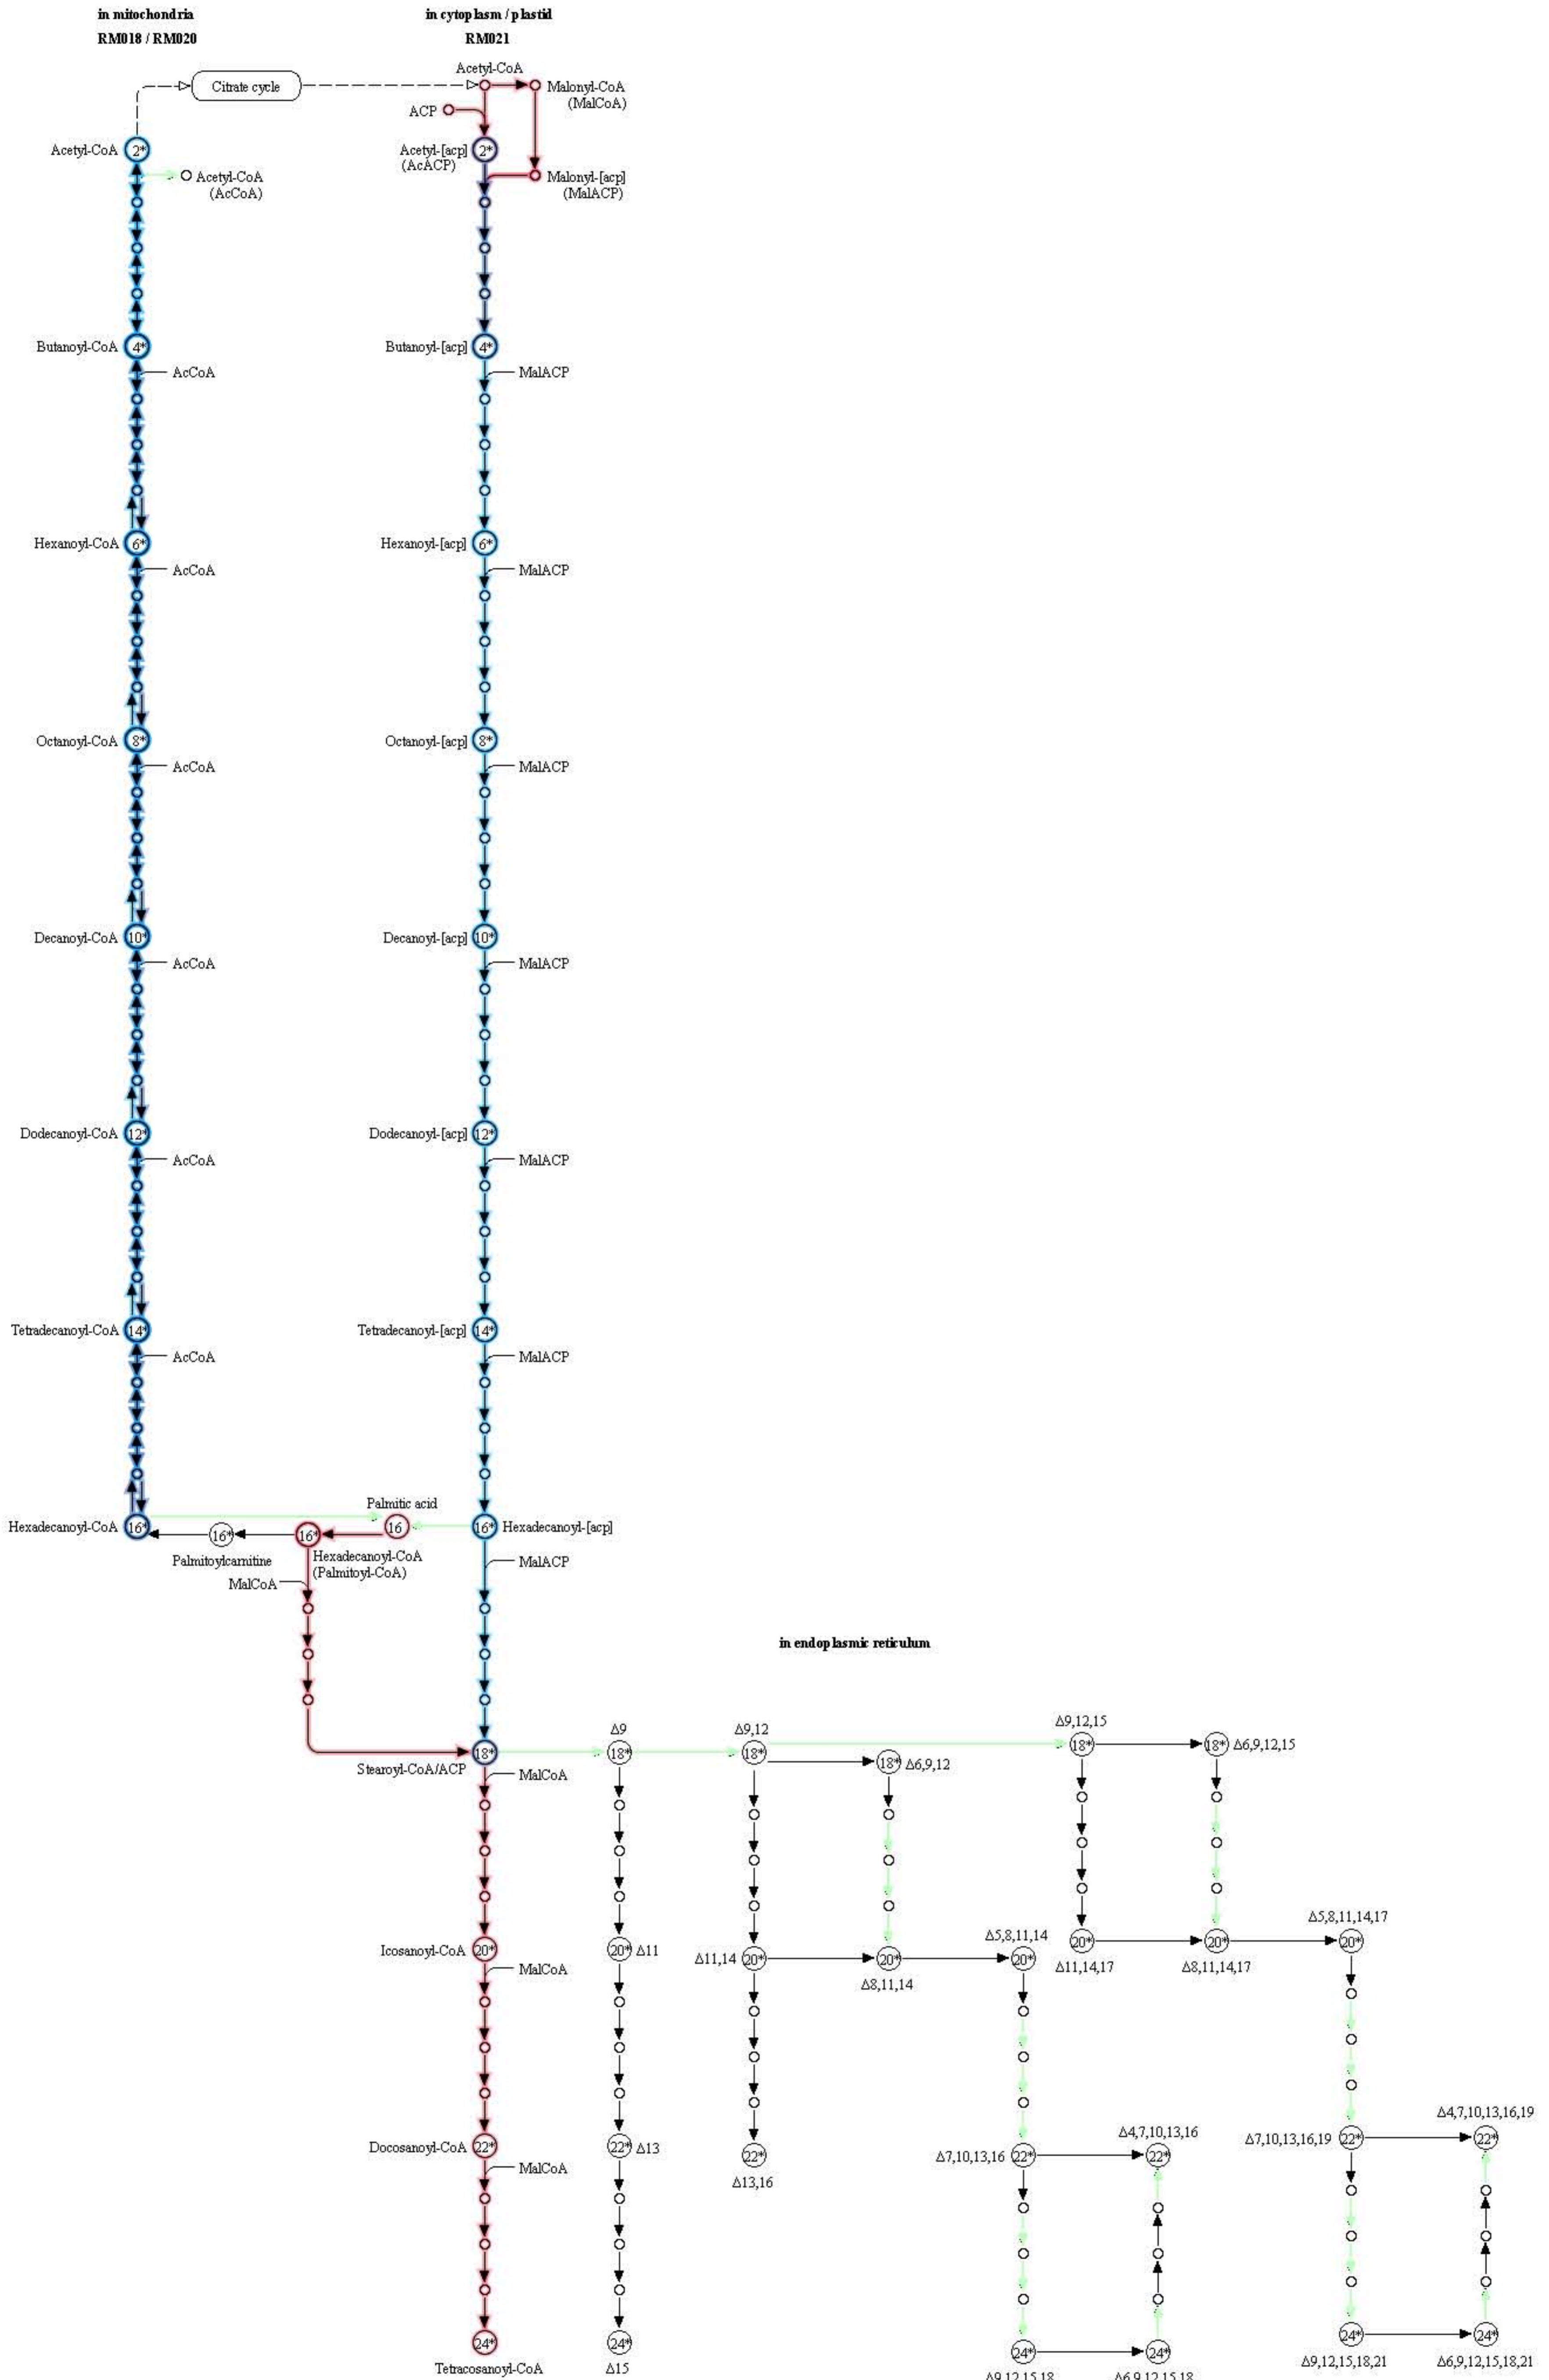



# FLAVONE AND FLAVONOL BIOSYNTHESIS

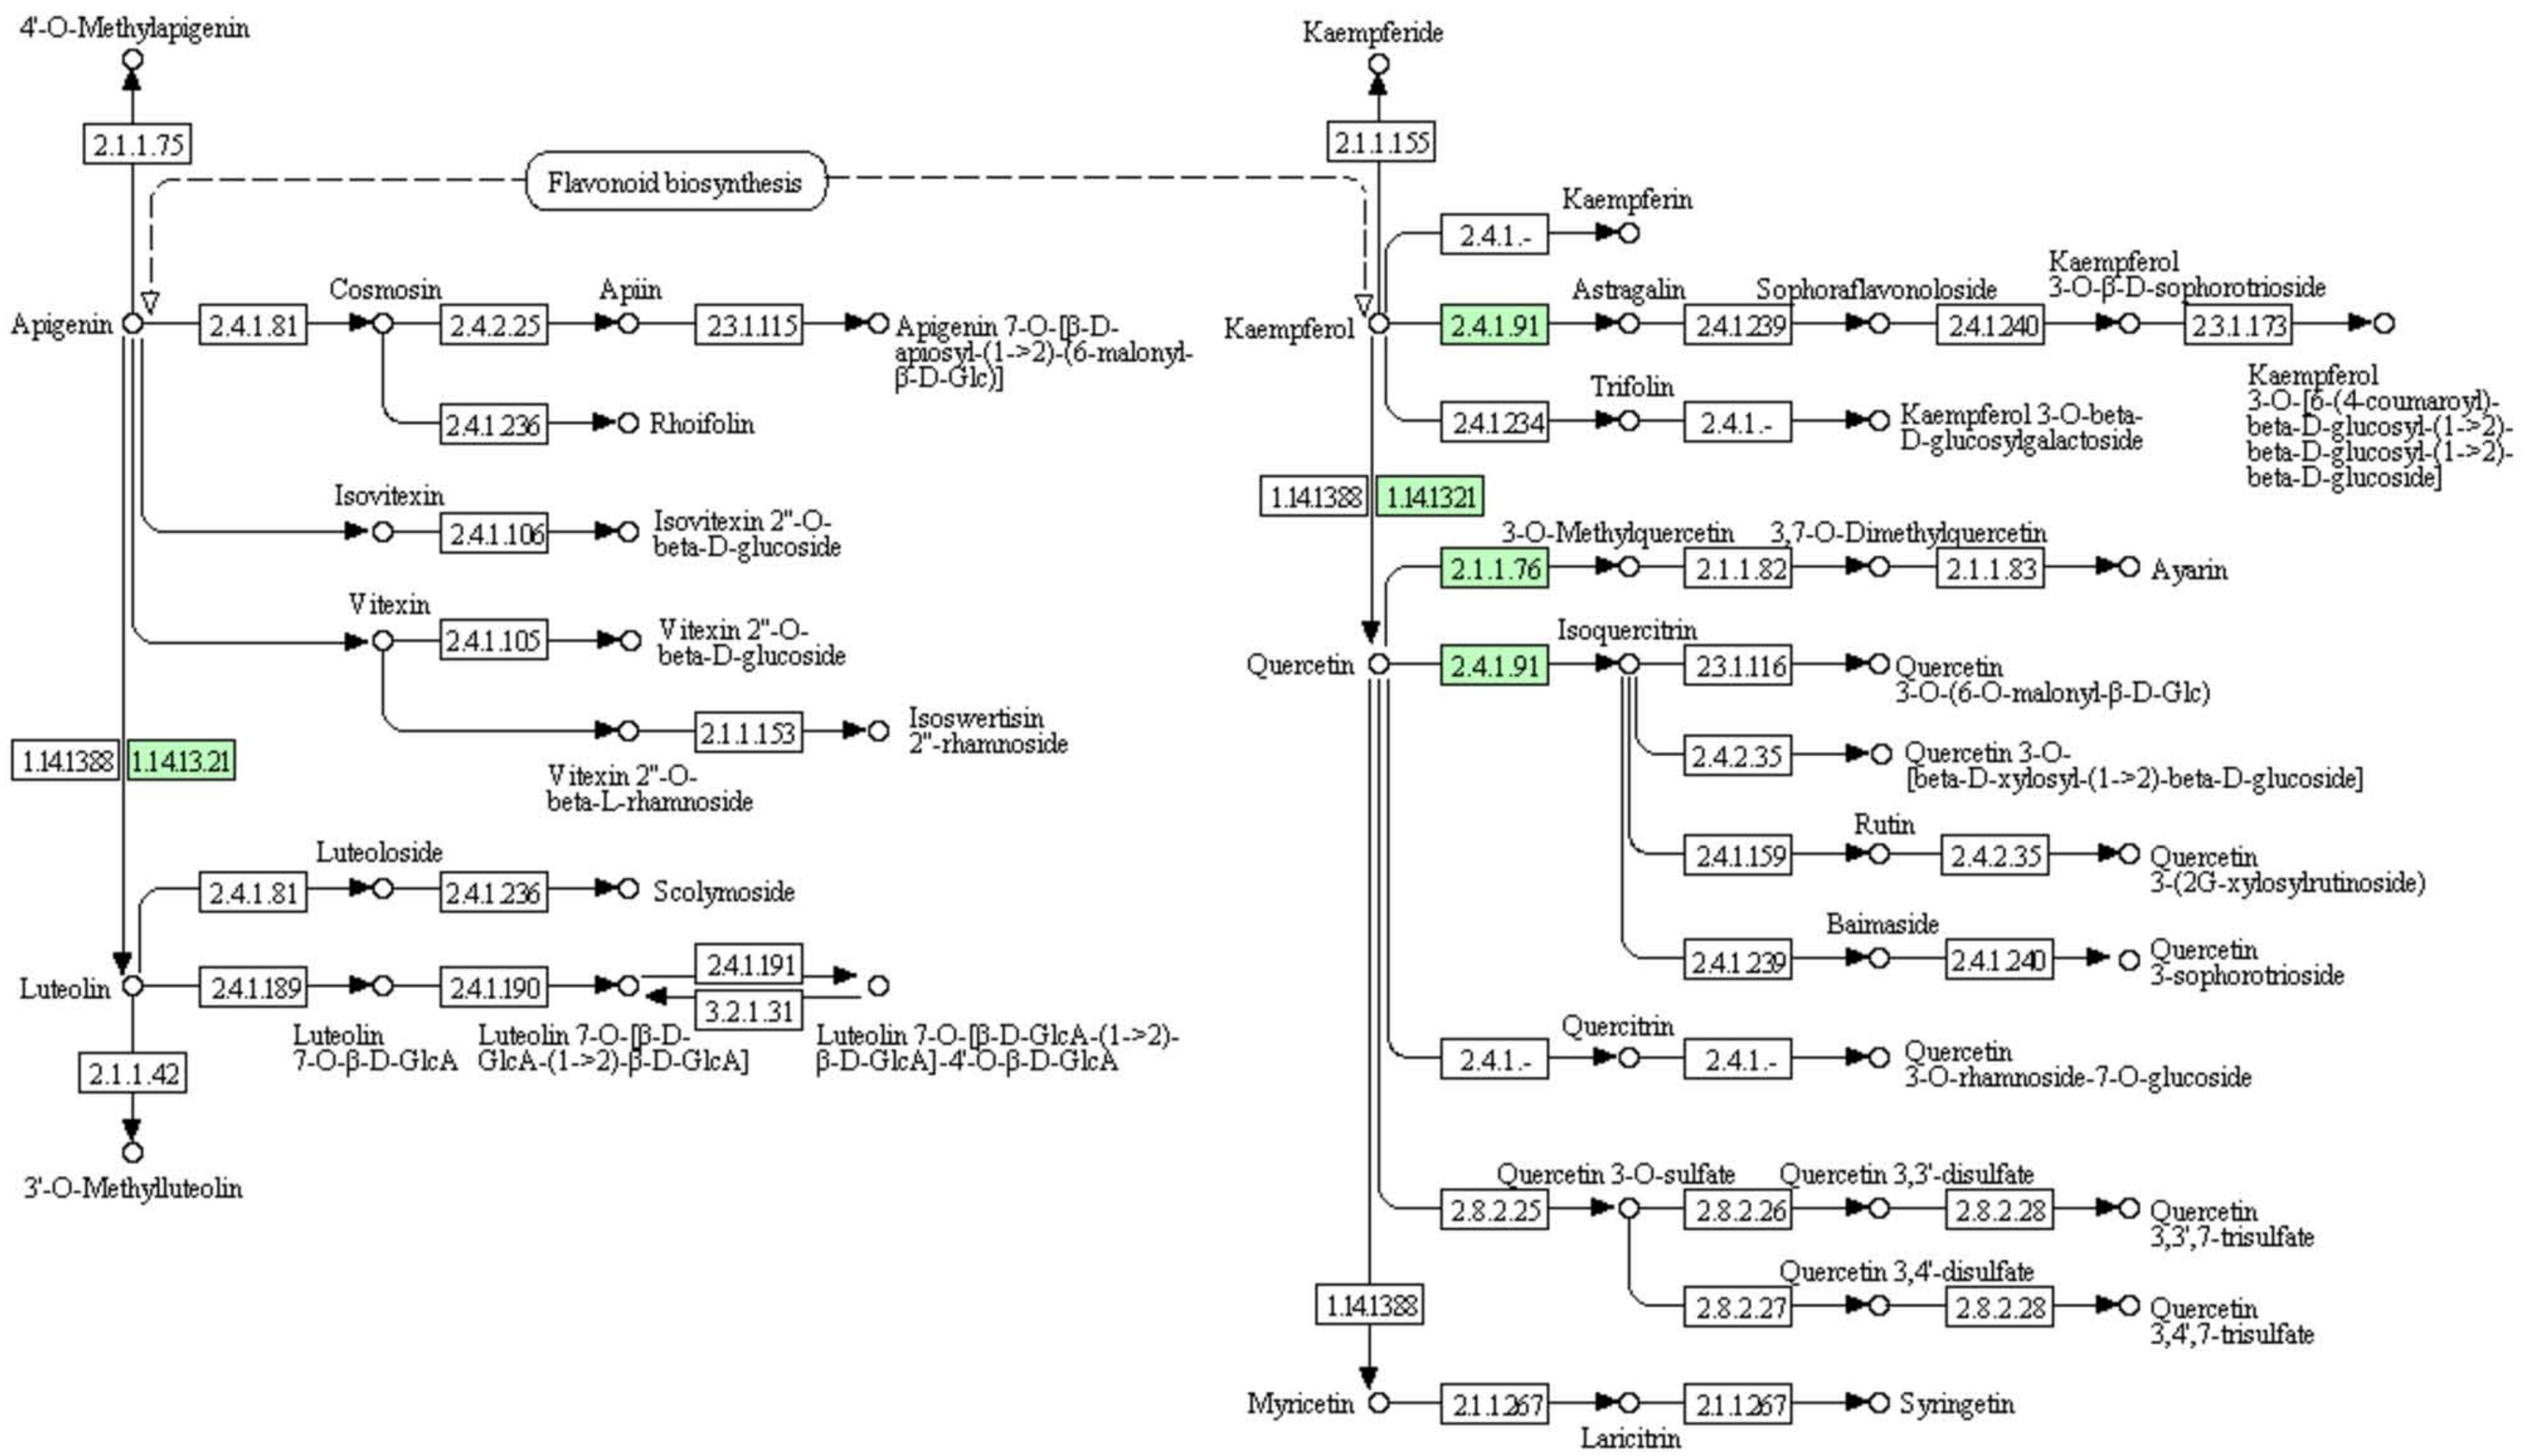



FLAVONOID BIOSYNTHESIS

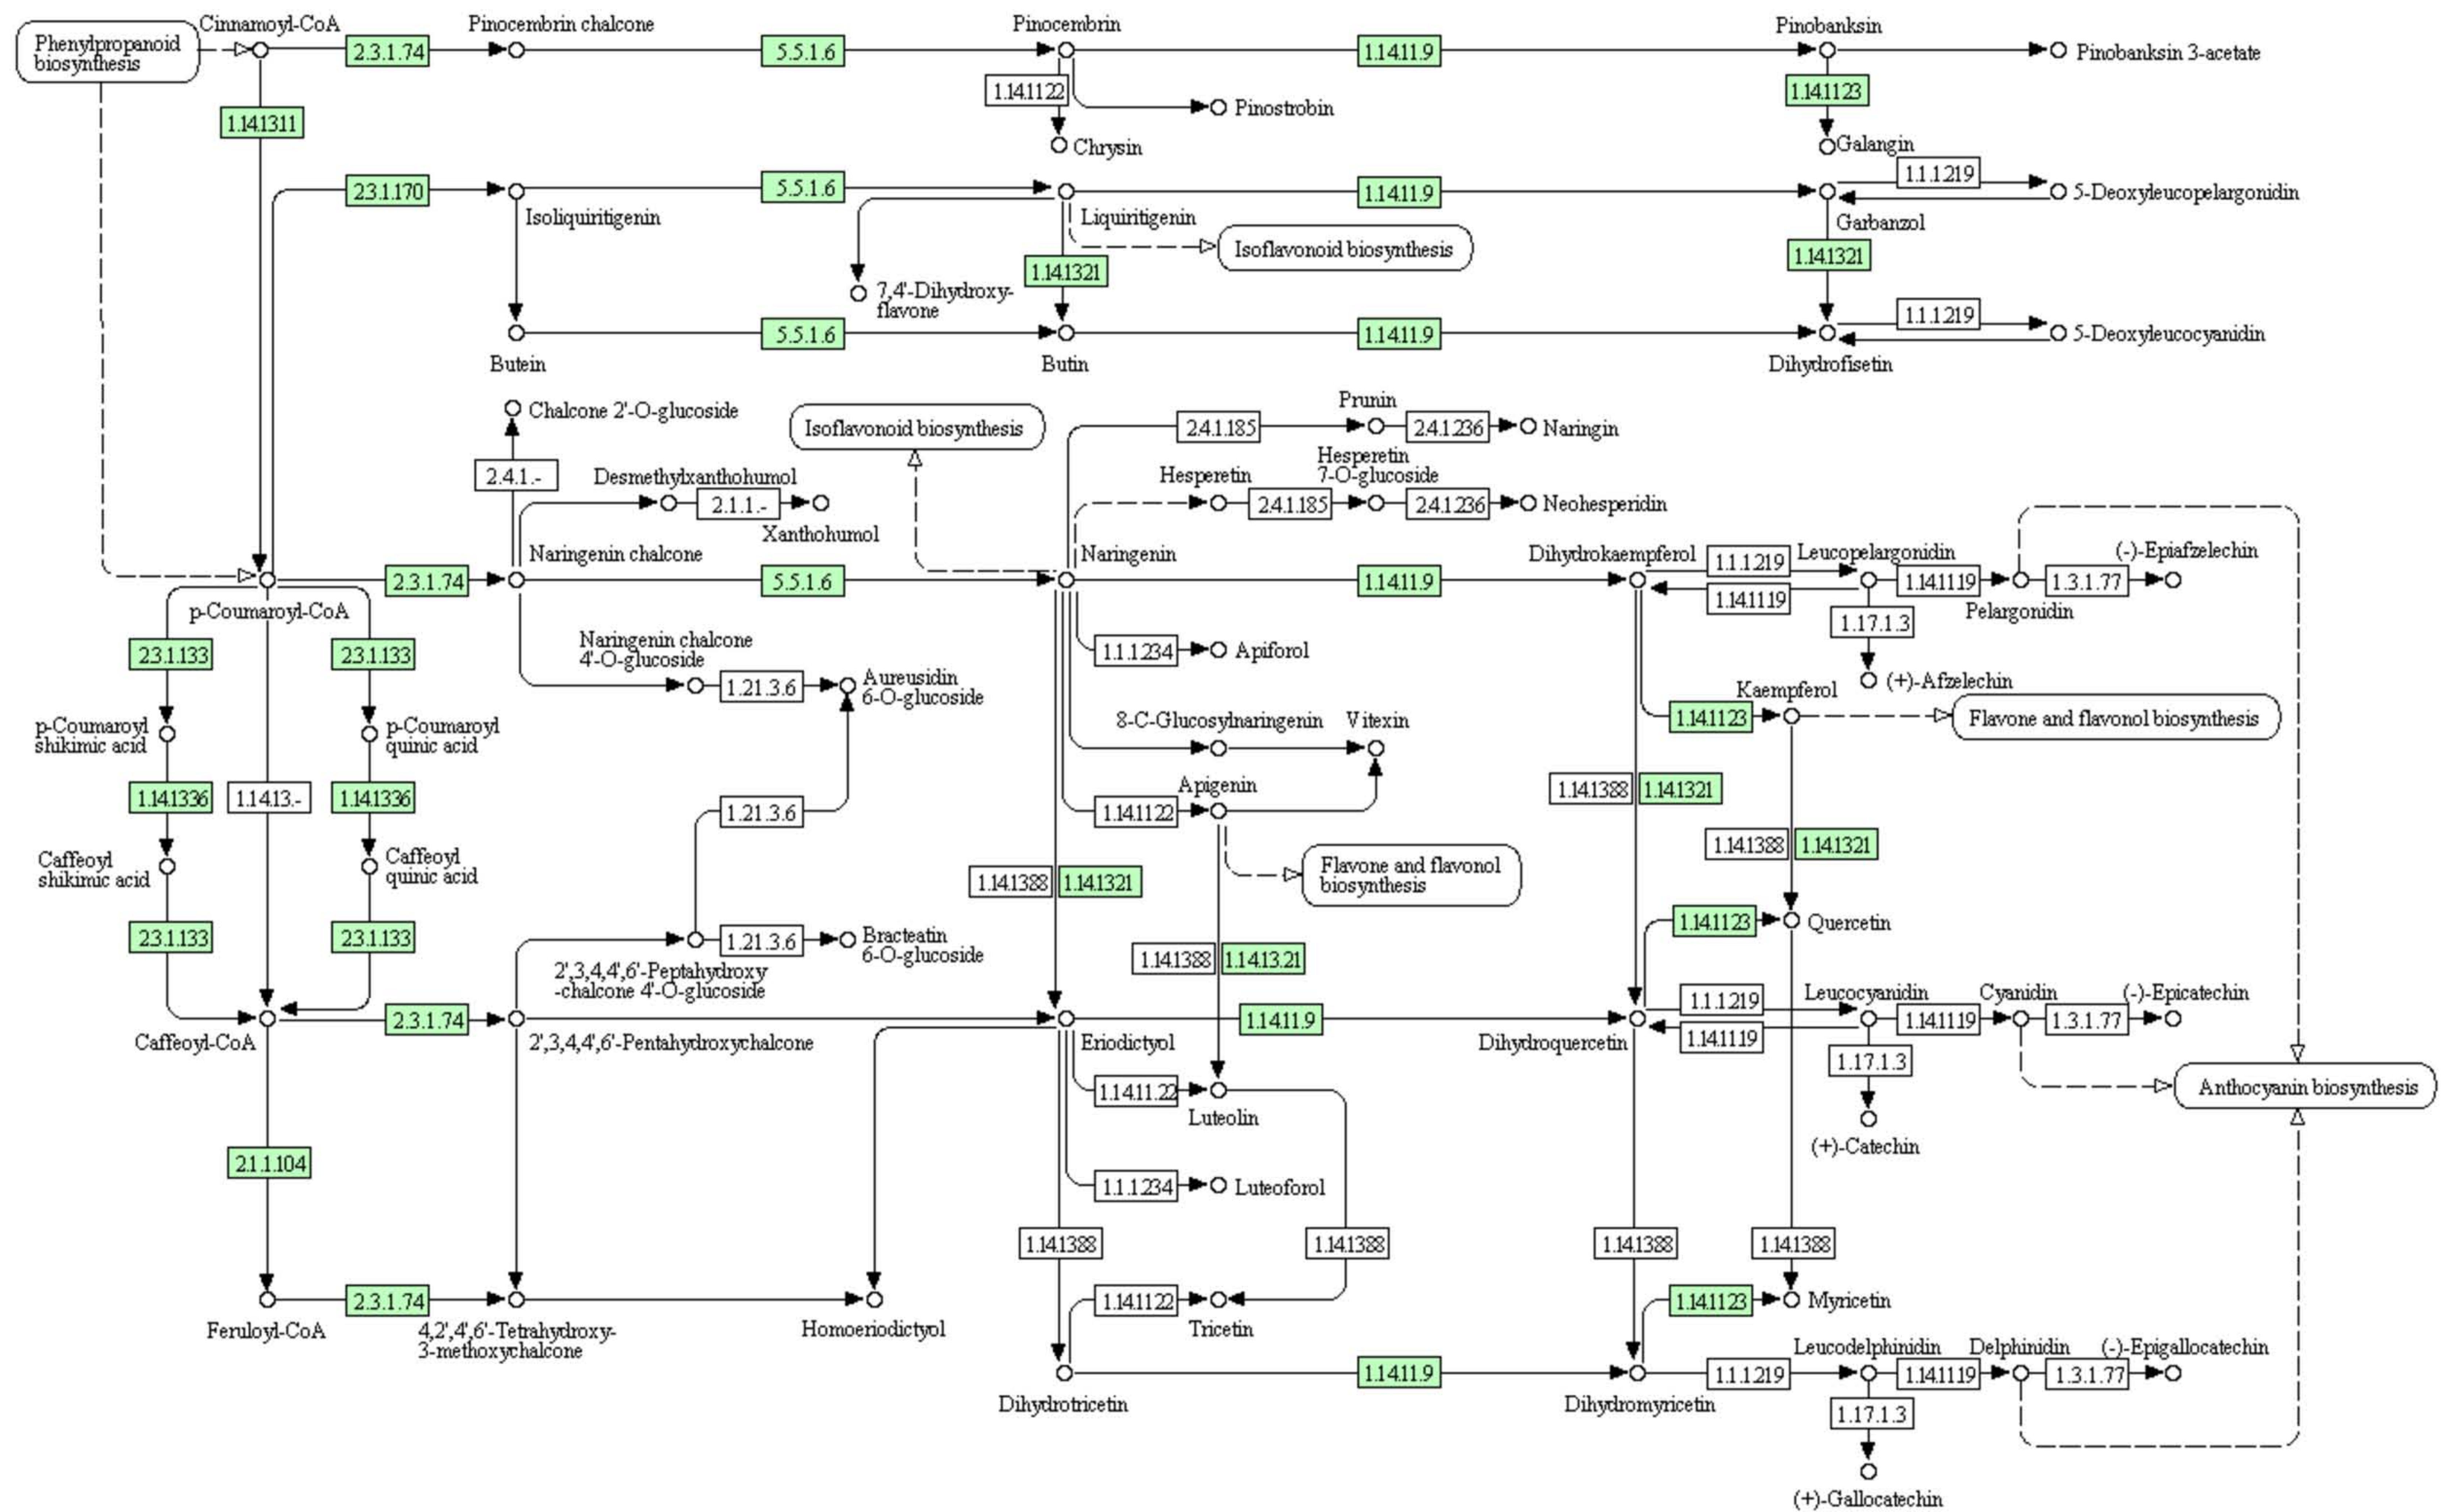



FOCAL ADHESION

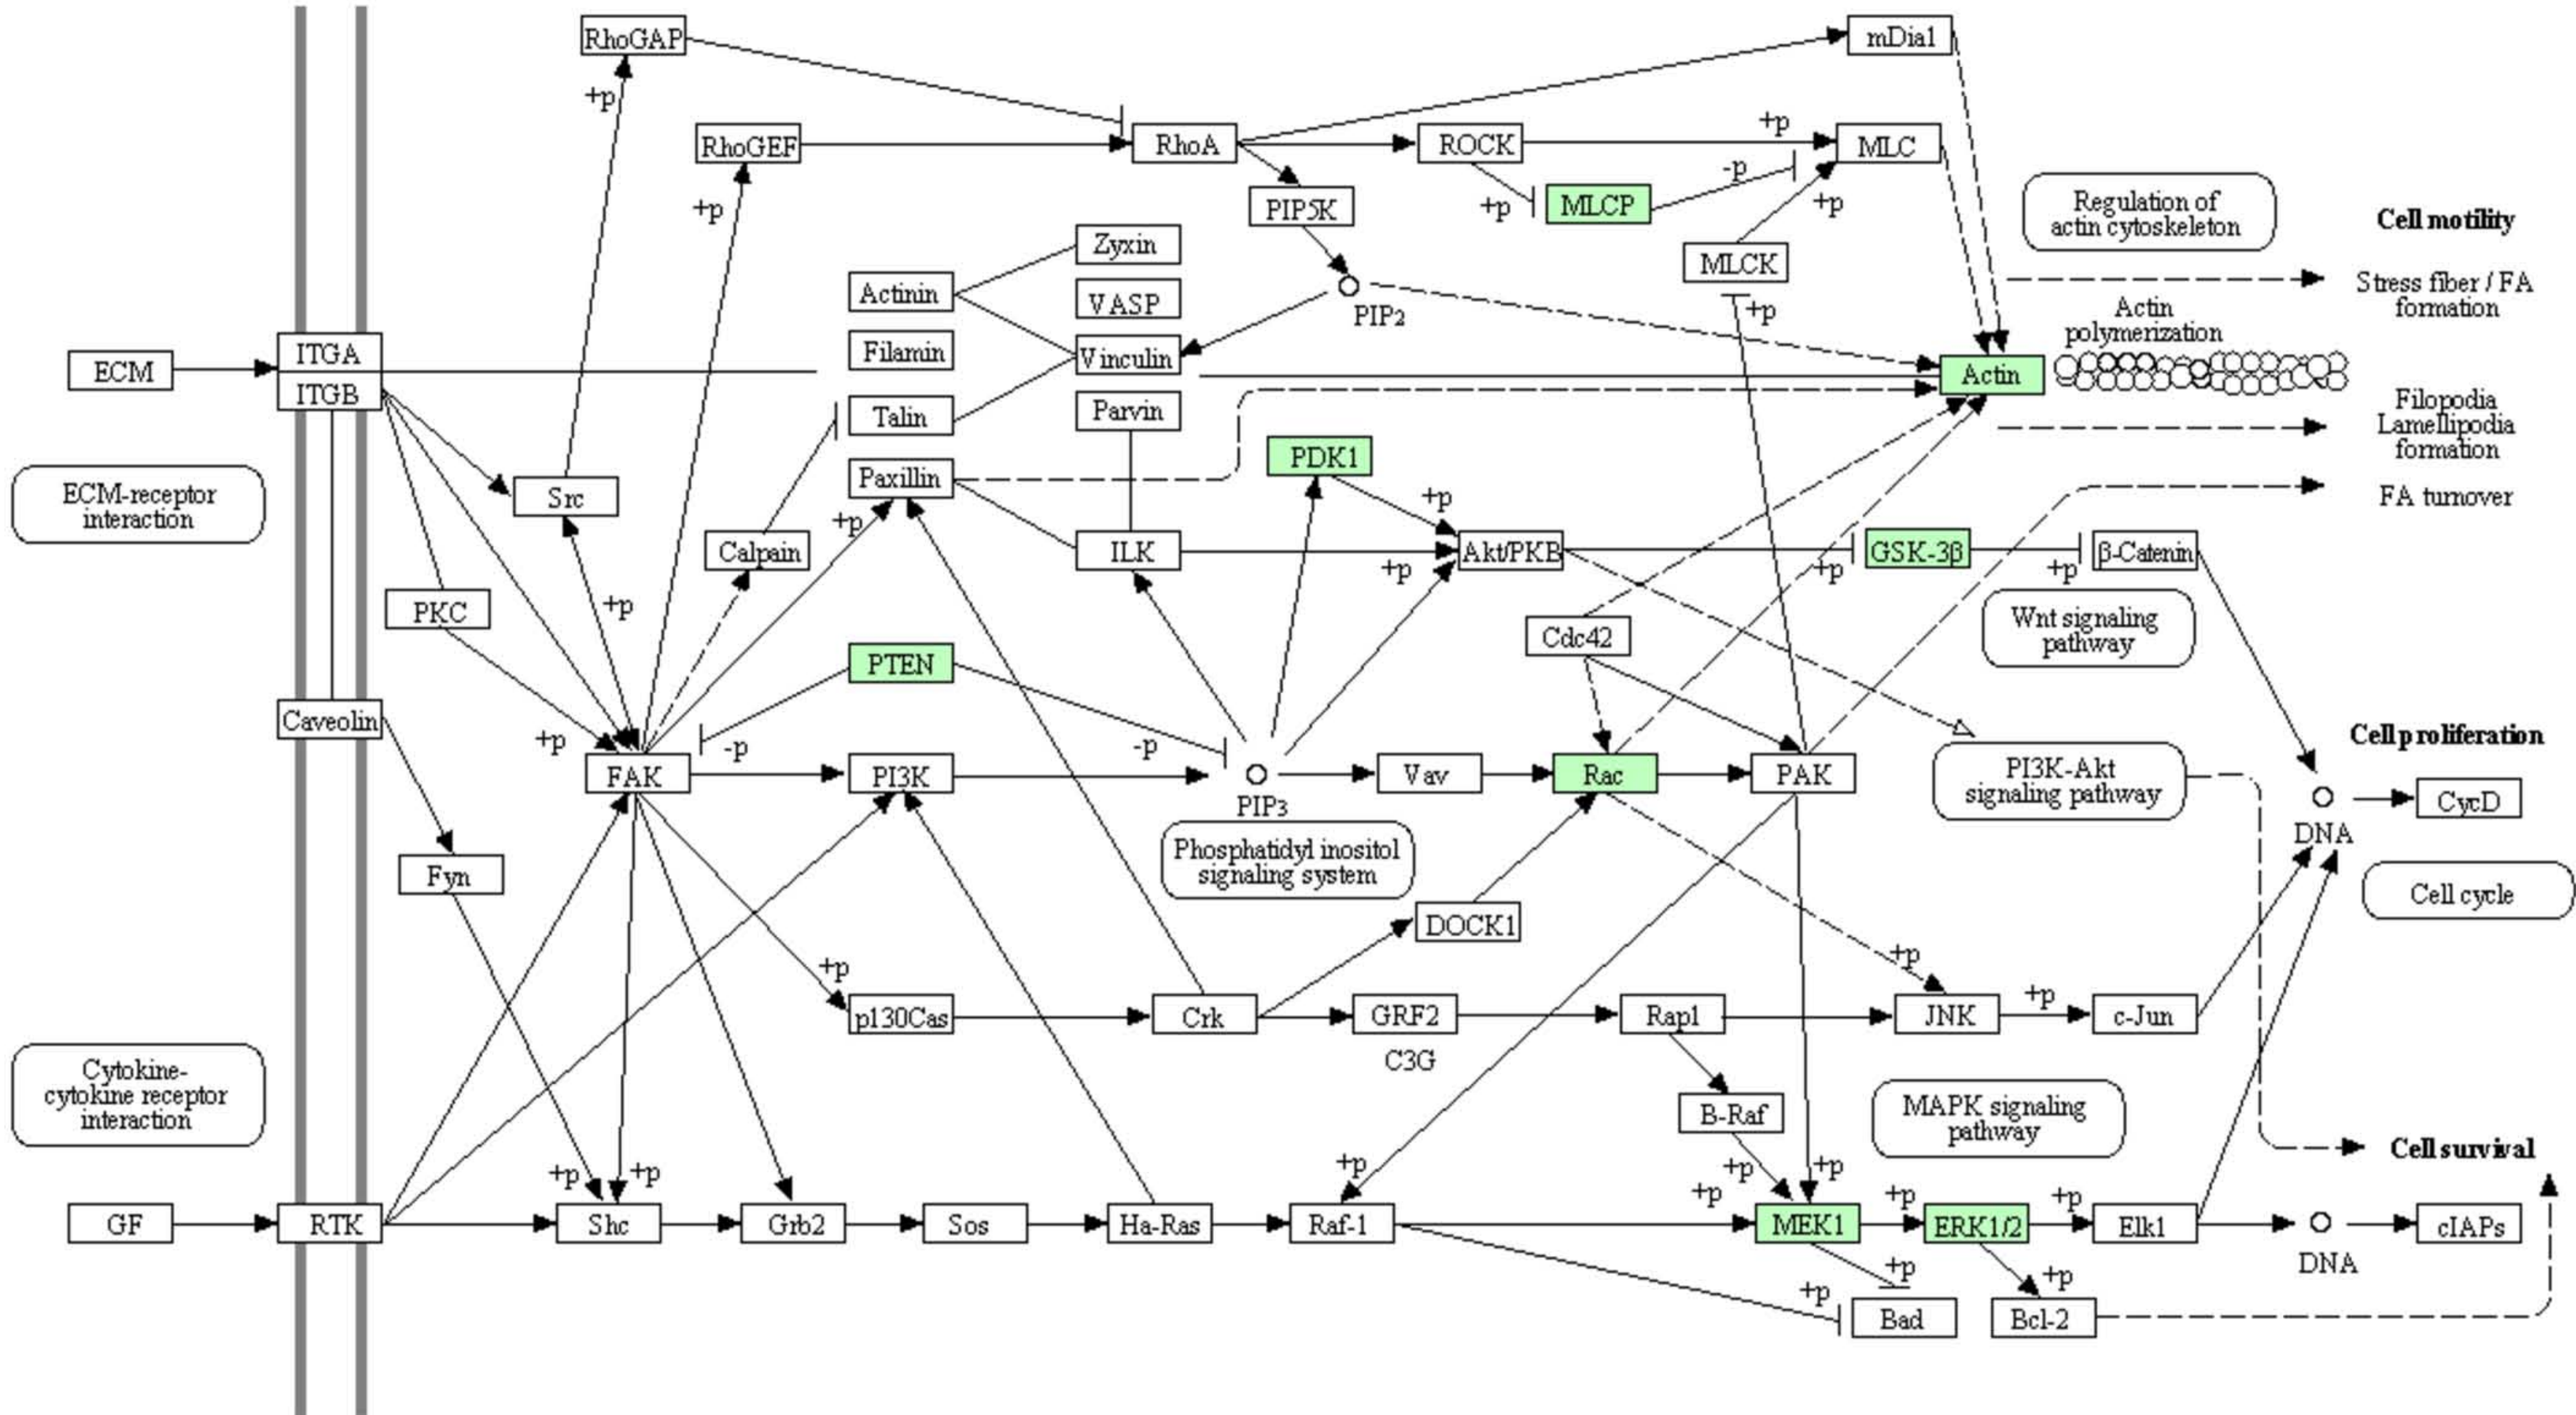



# FOLATE BIOSYNTHESIS

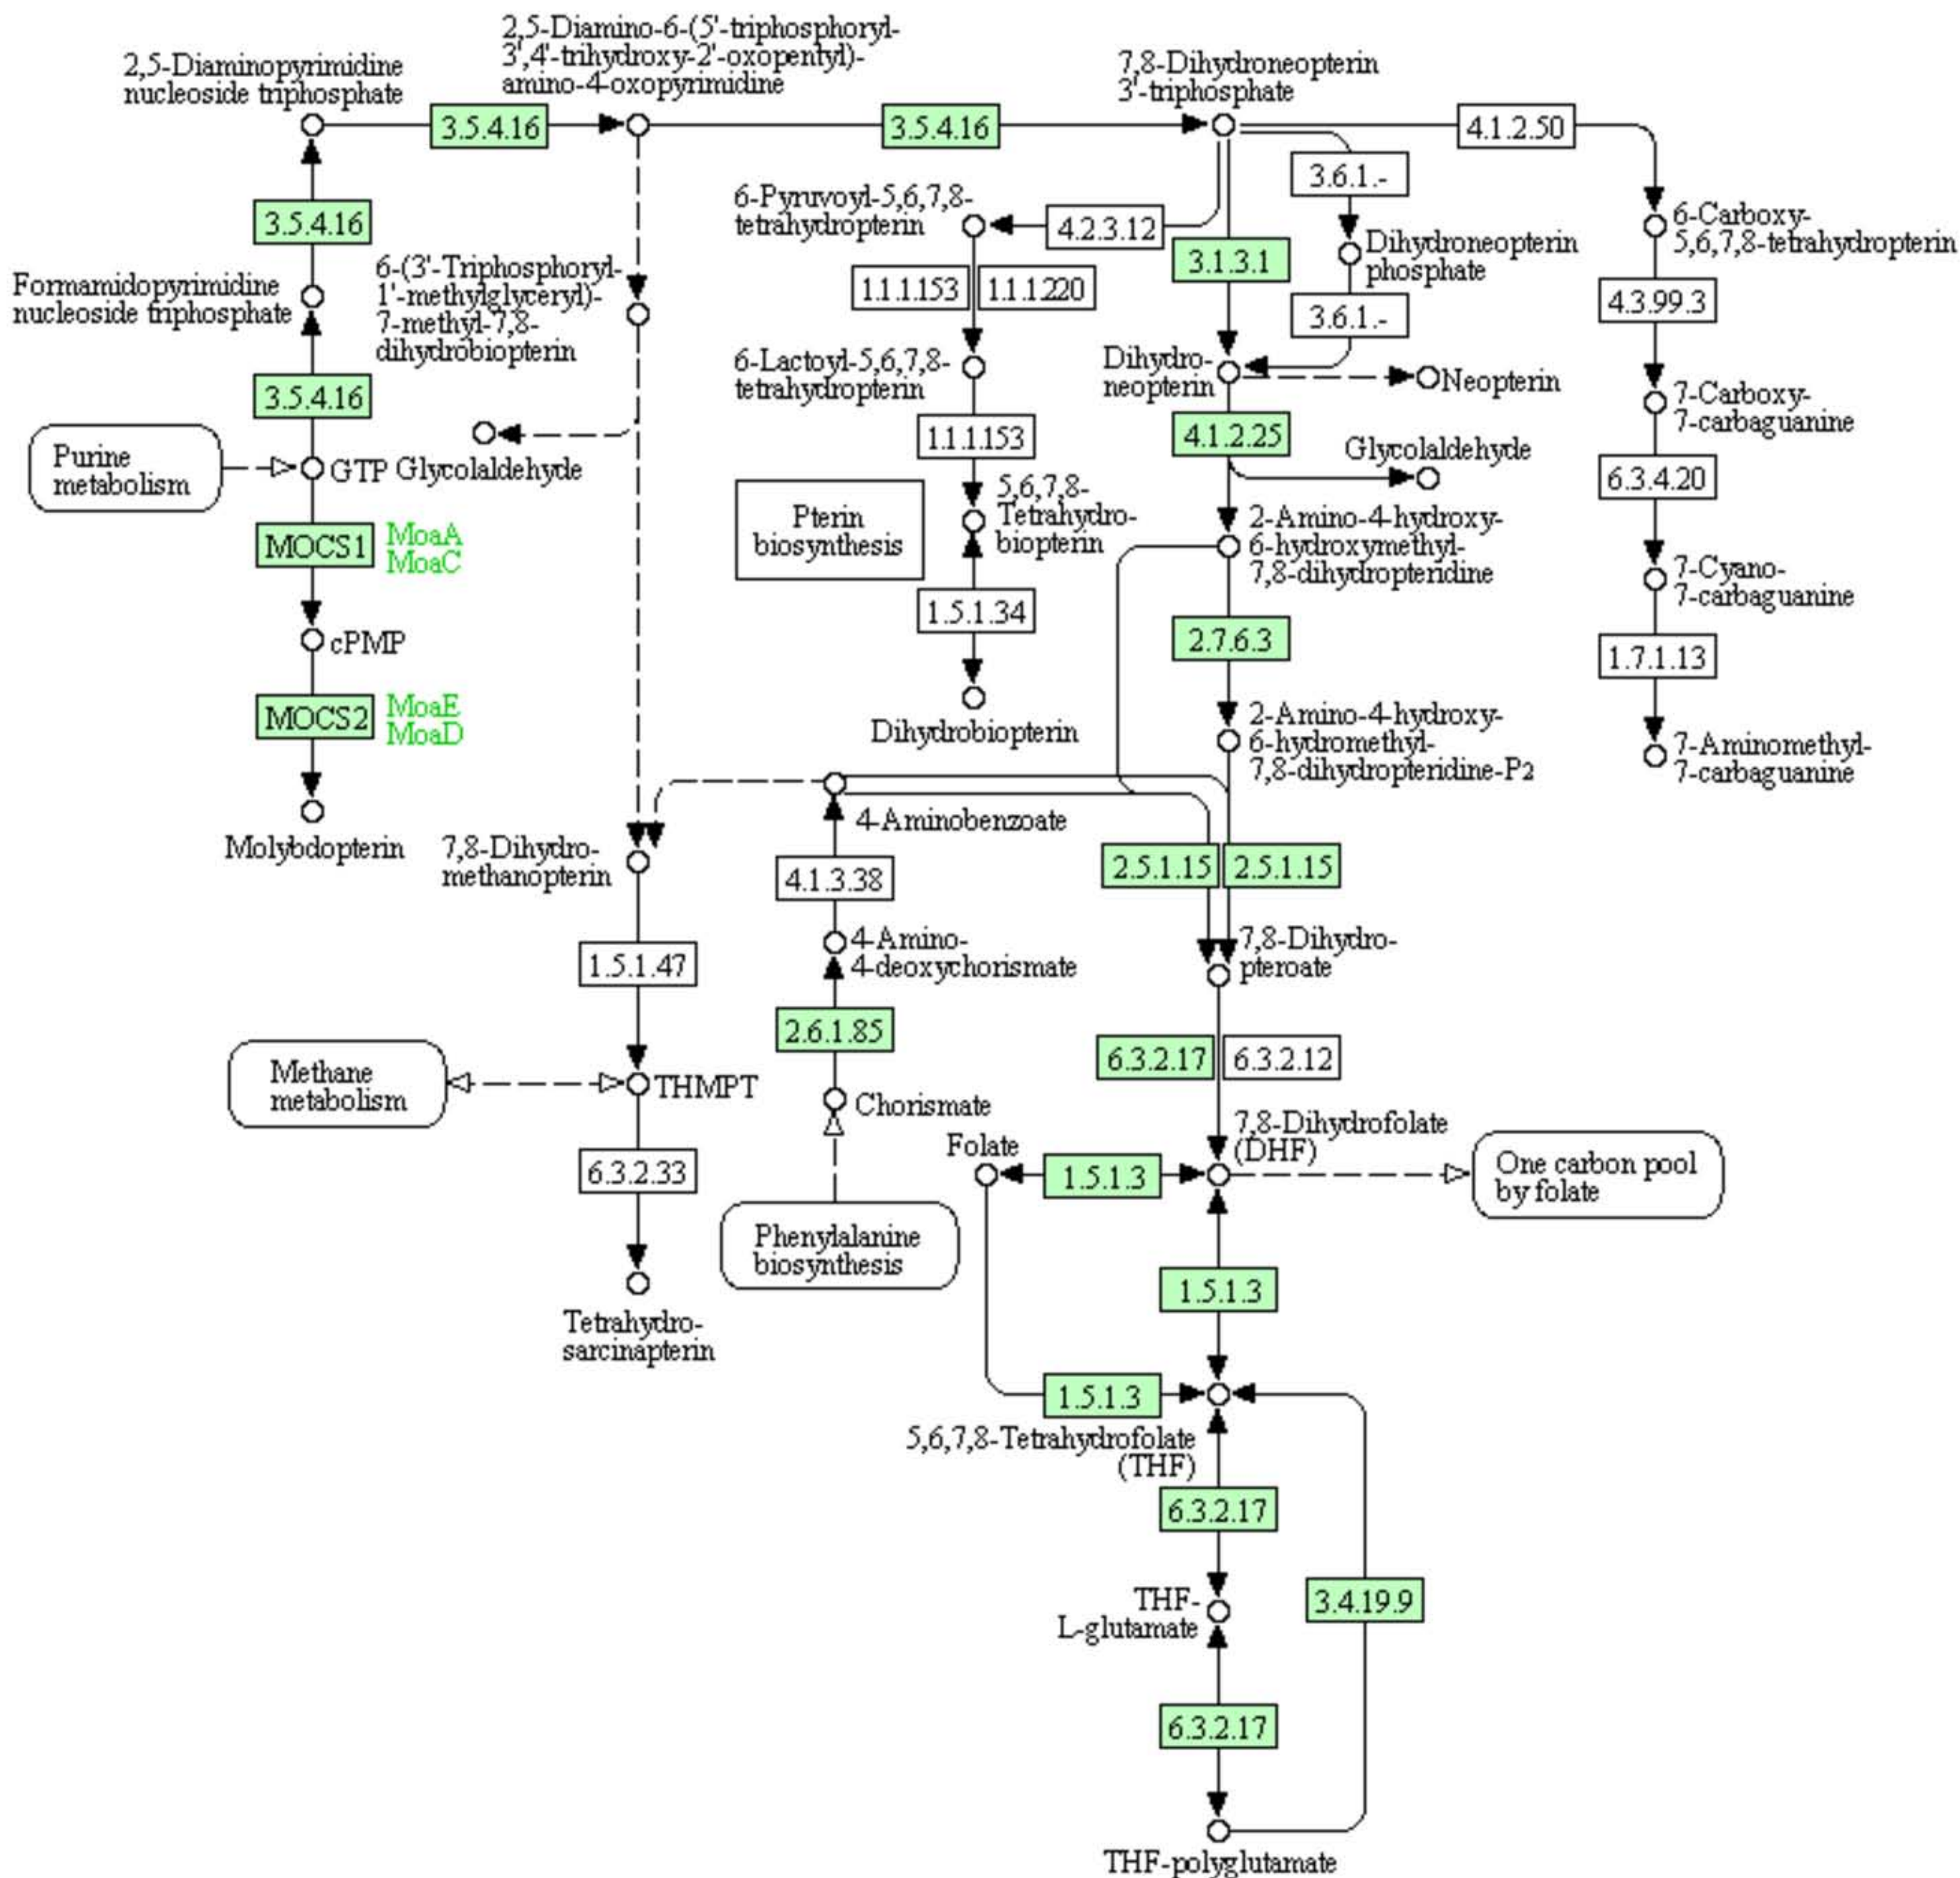



# FOXO SIGNALING PATHWAY

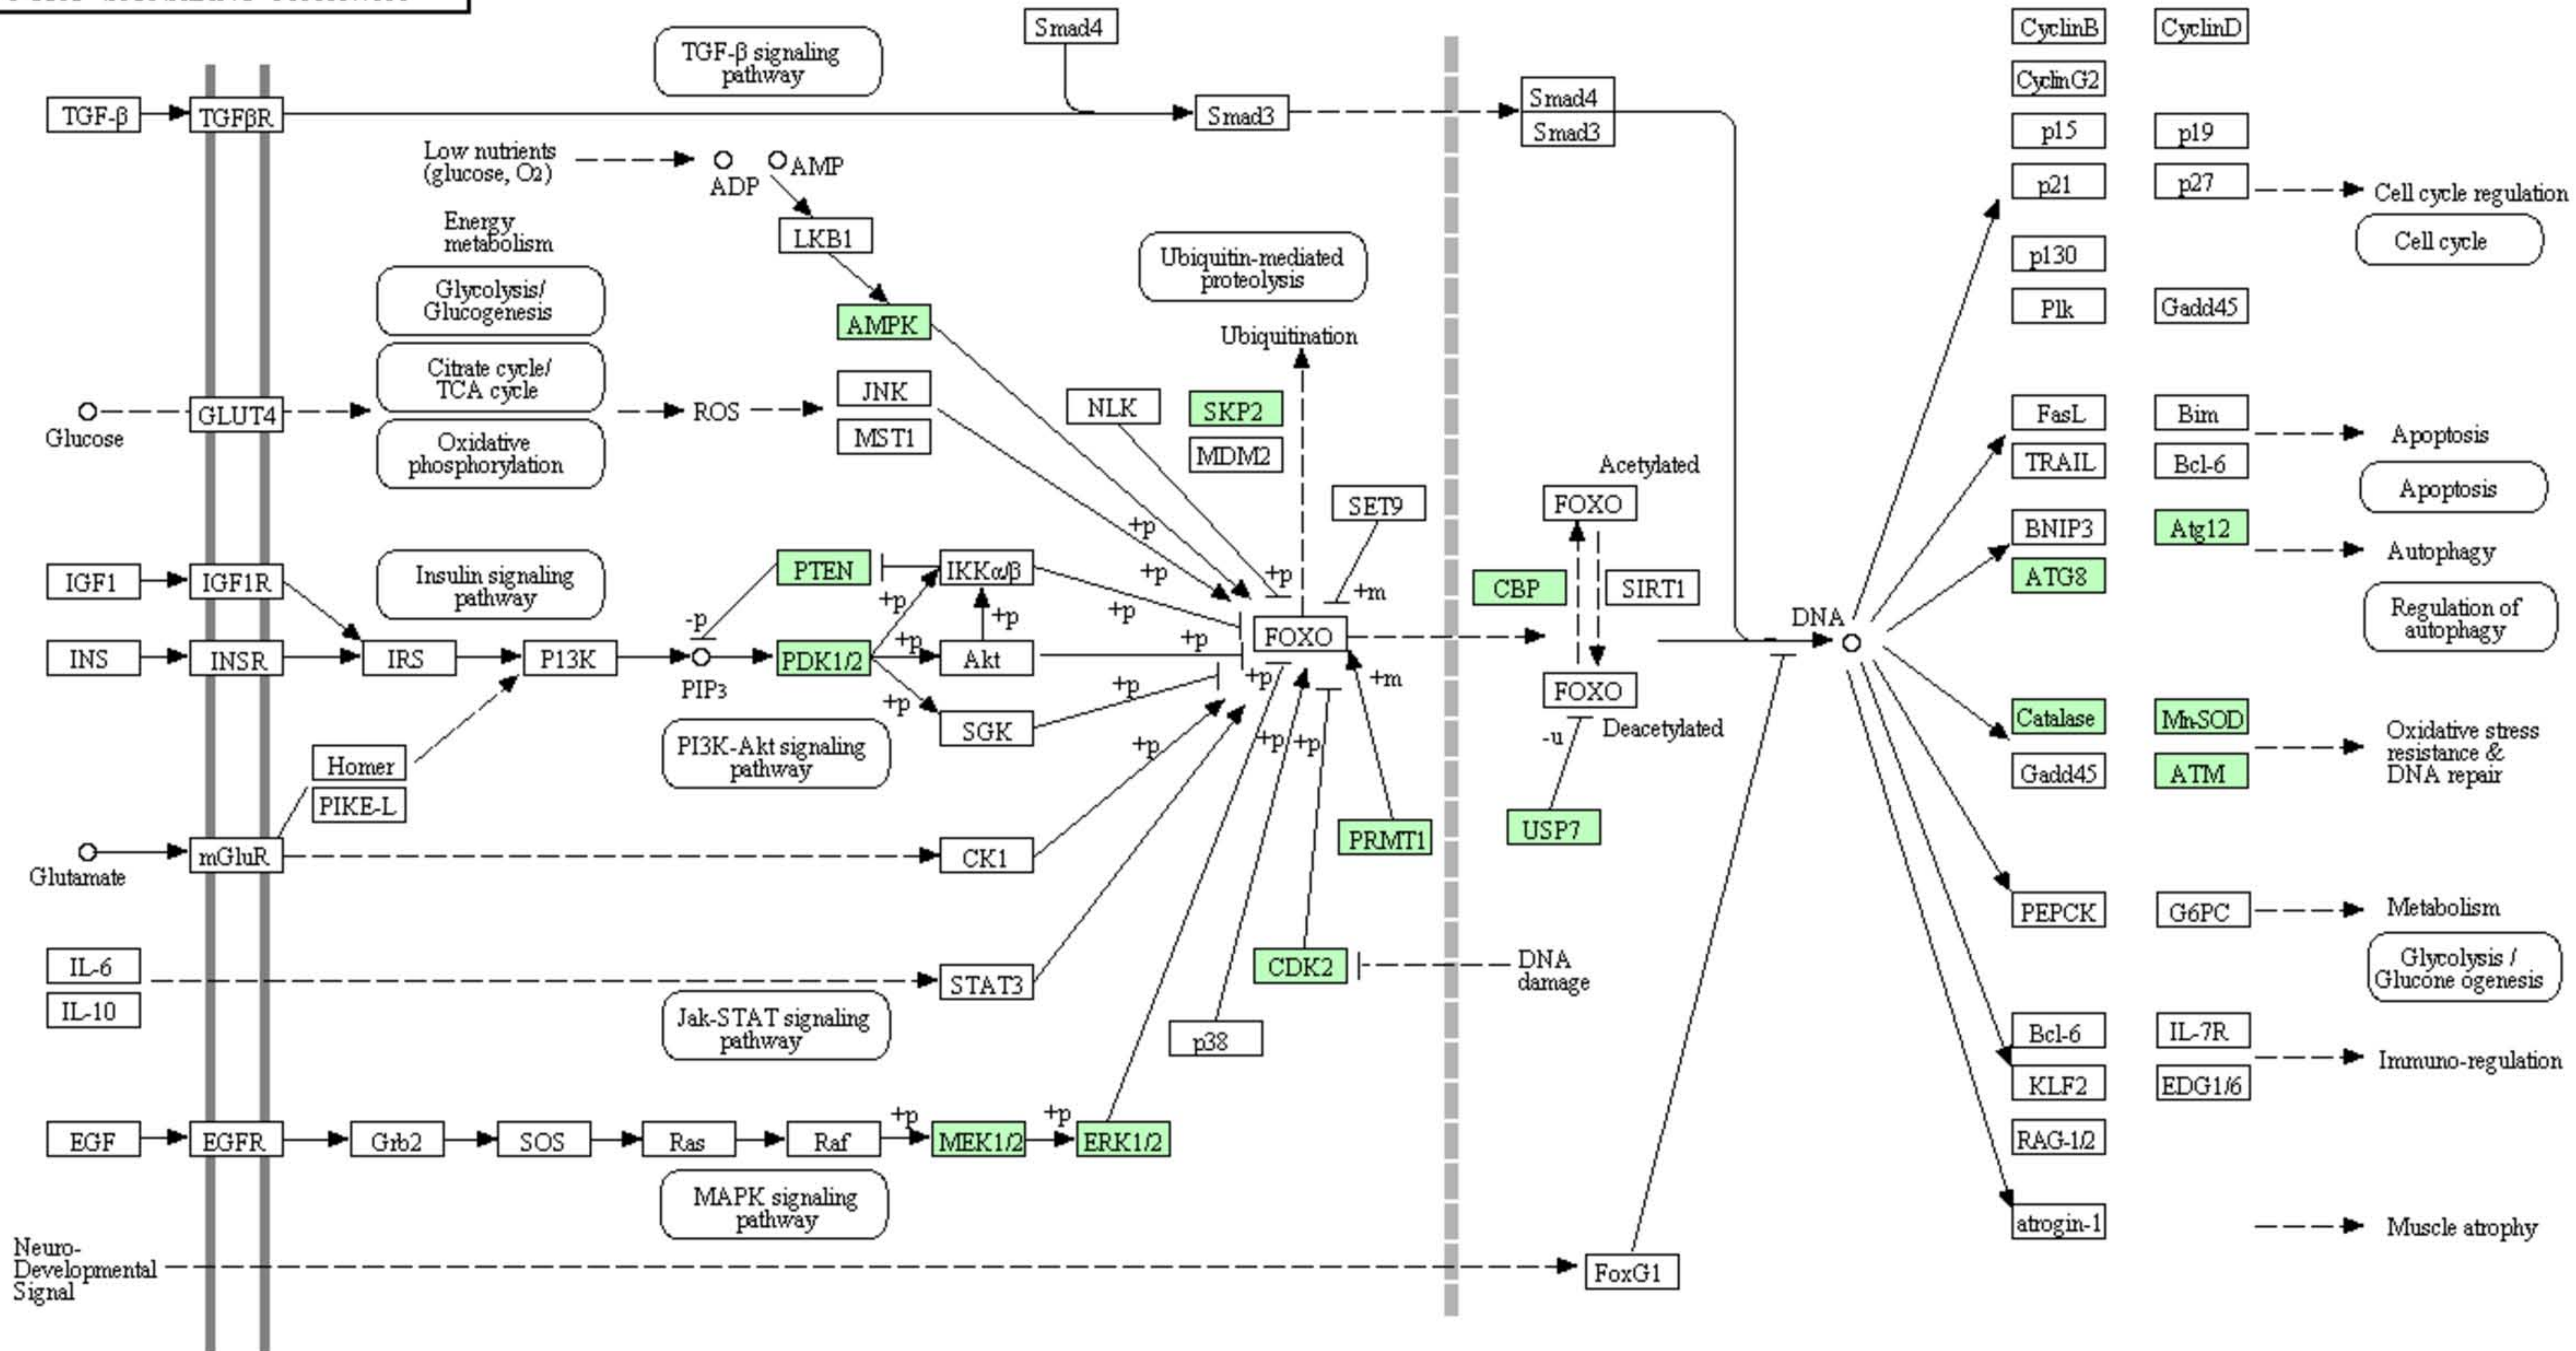



# FRUCTOSE AND MANNOSE METABOLISM

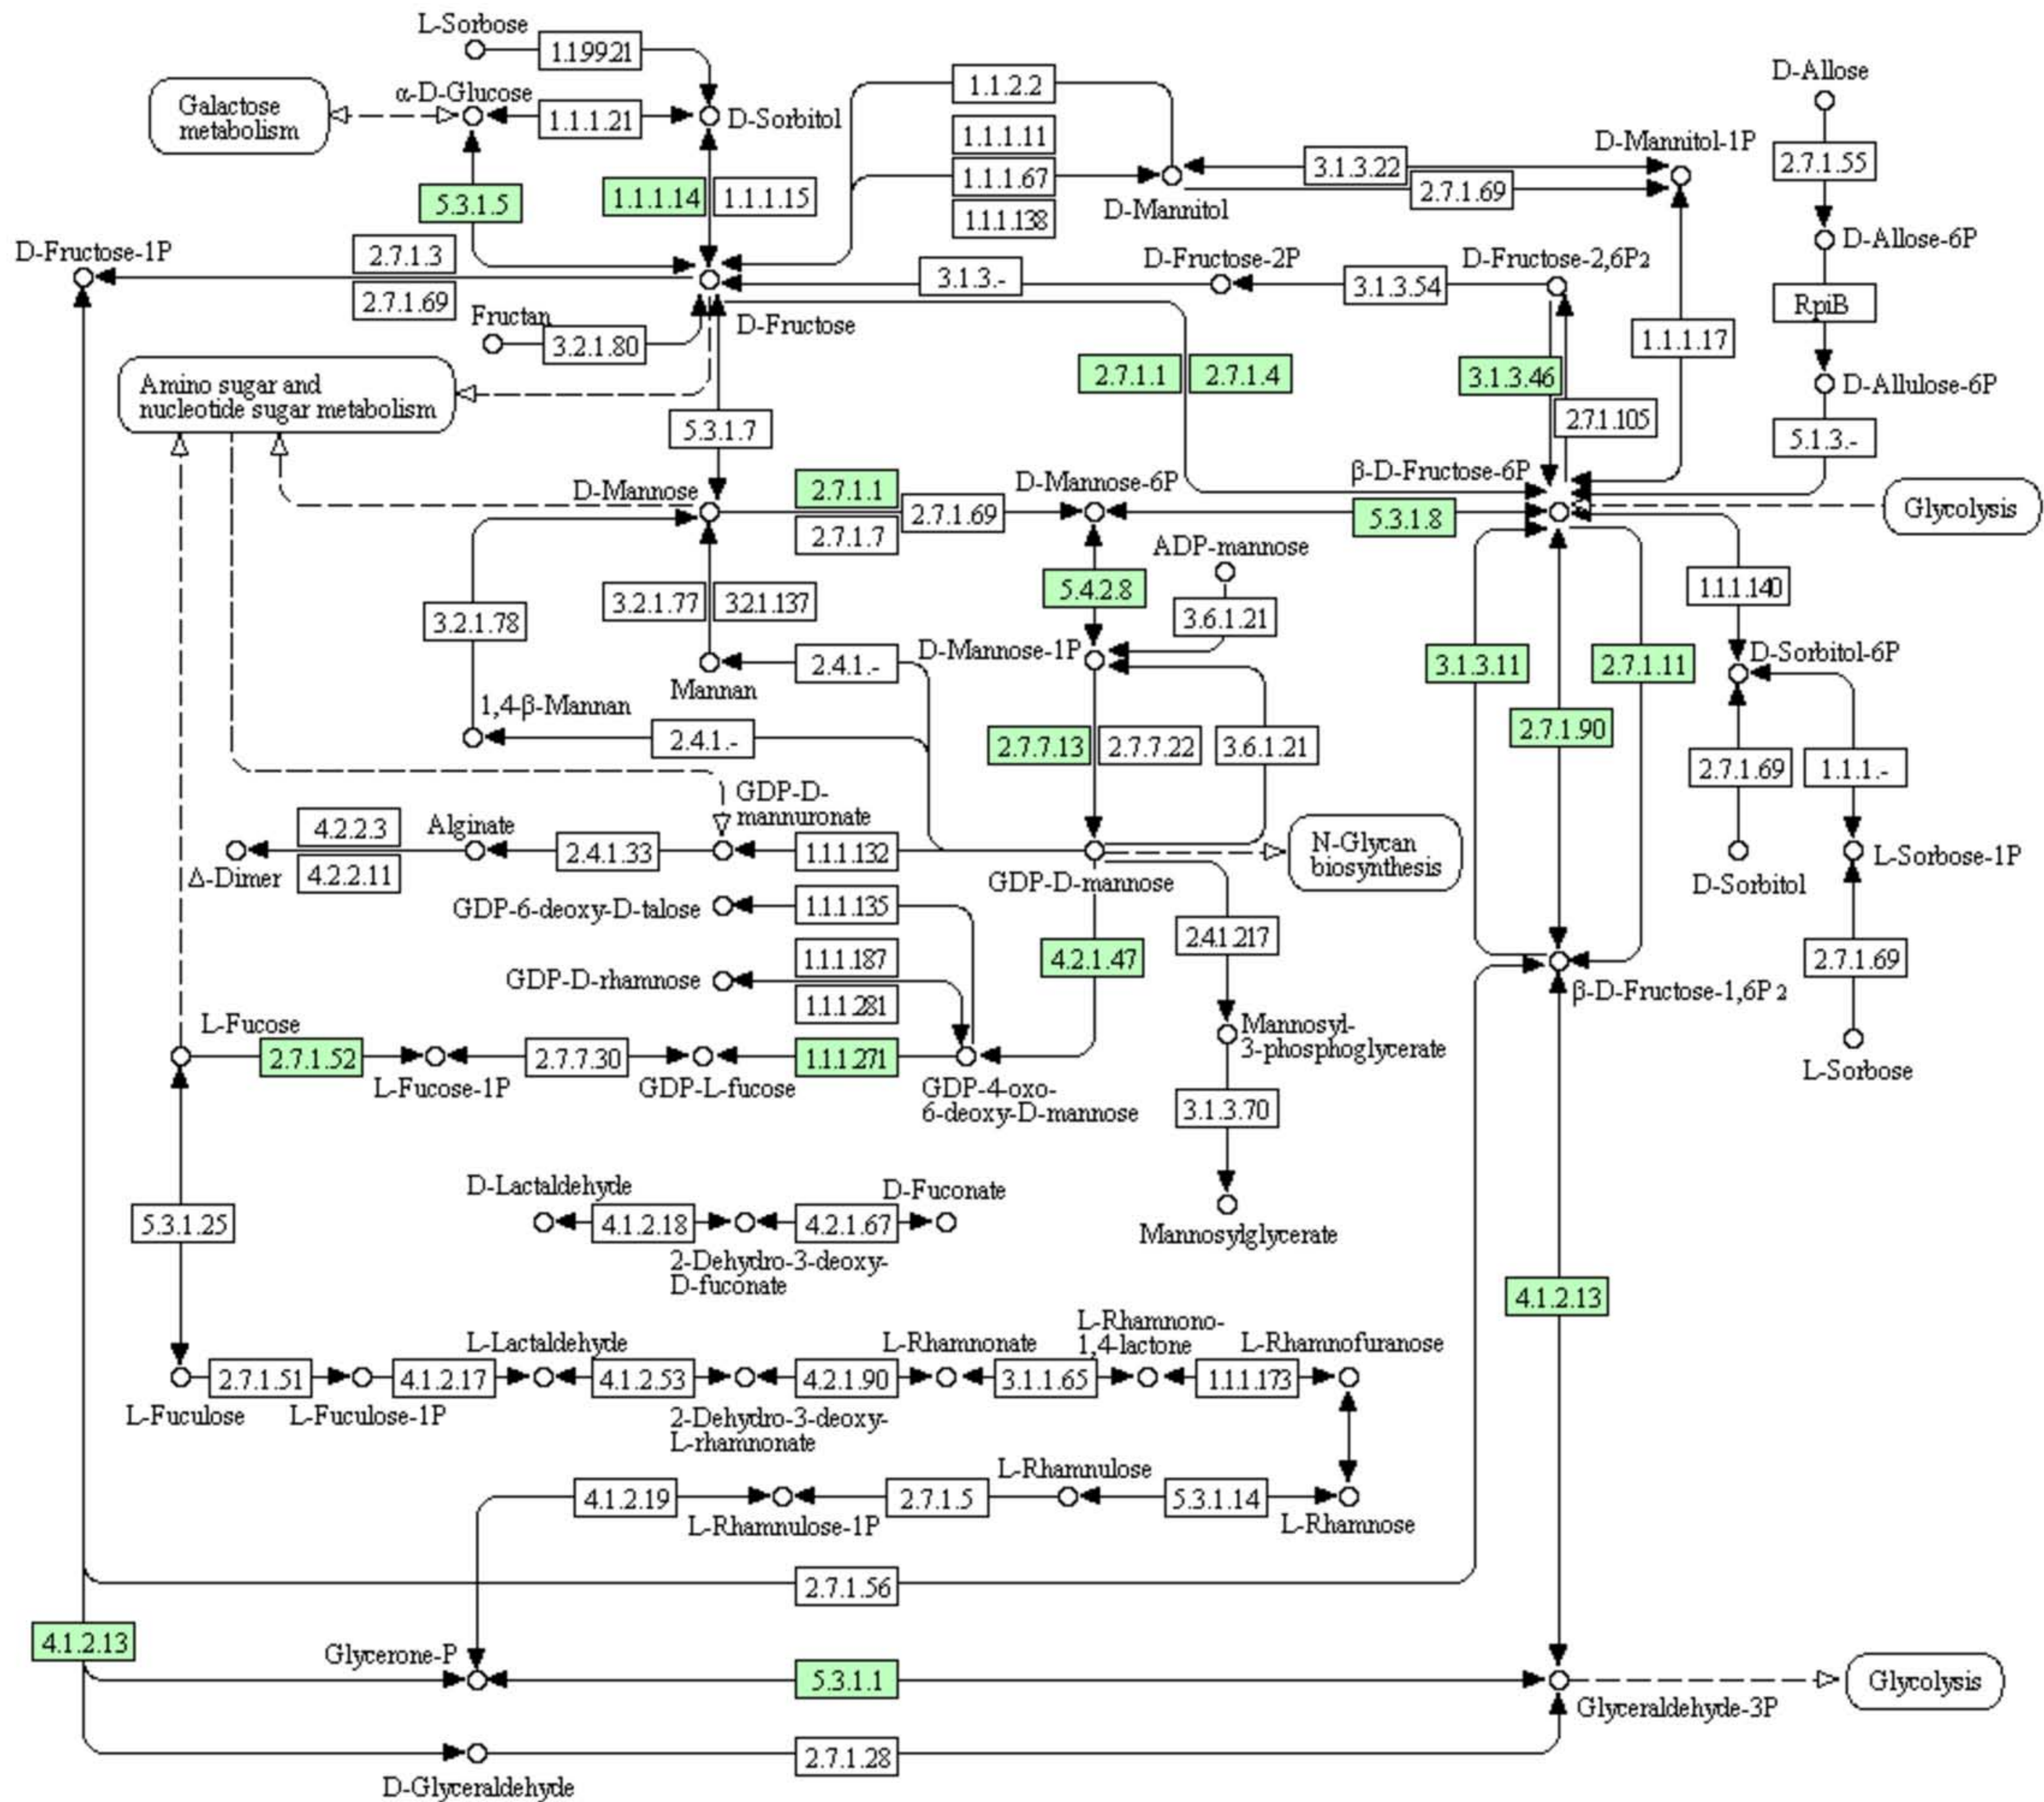



# GALACTOSE METABOLISM

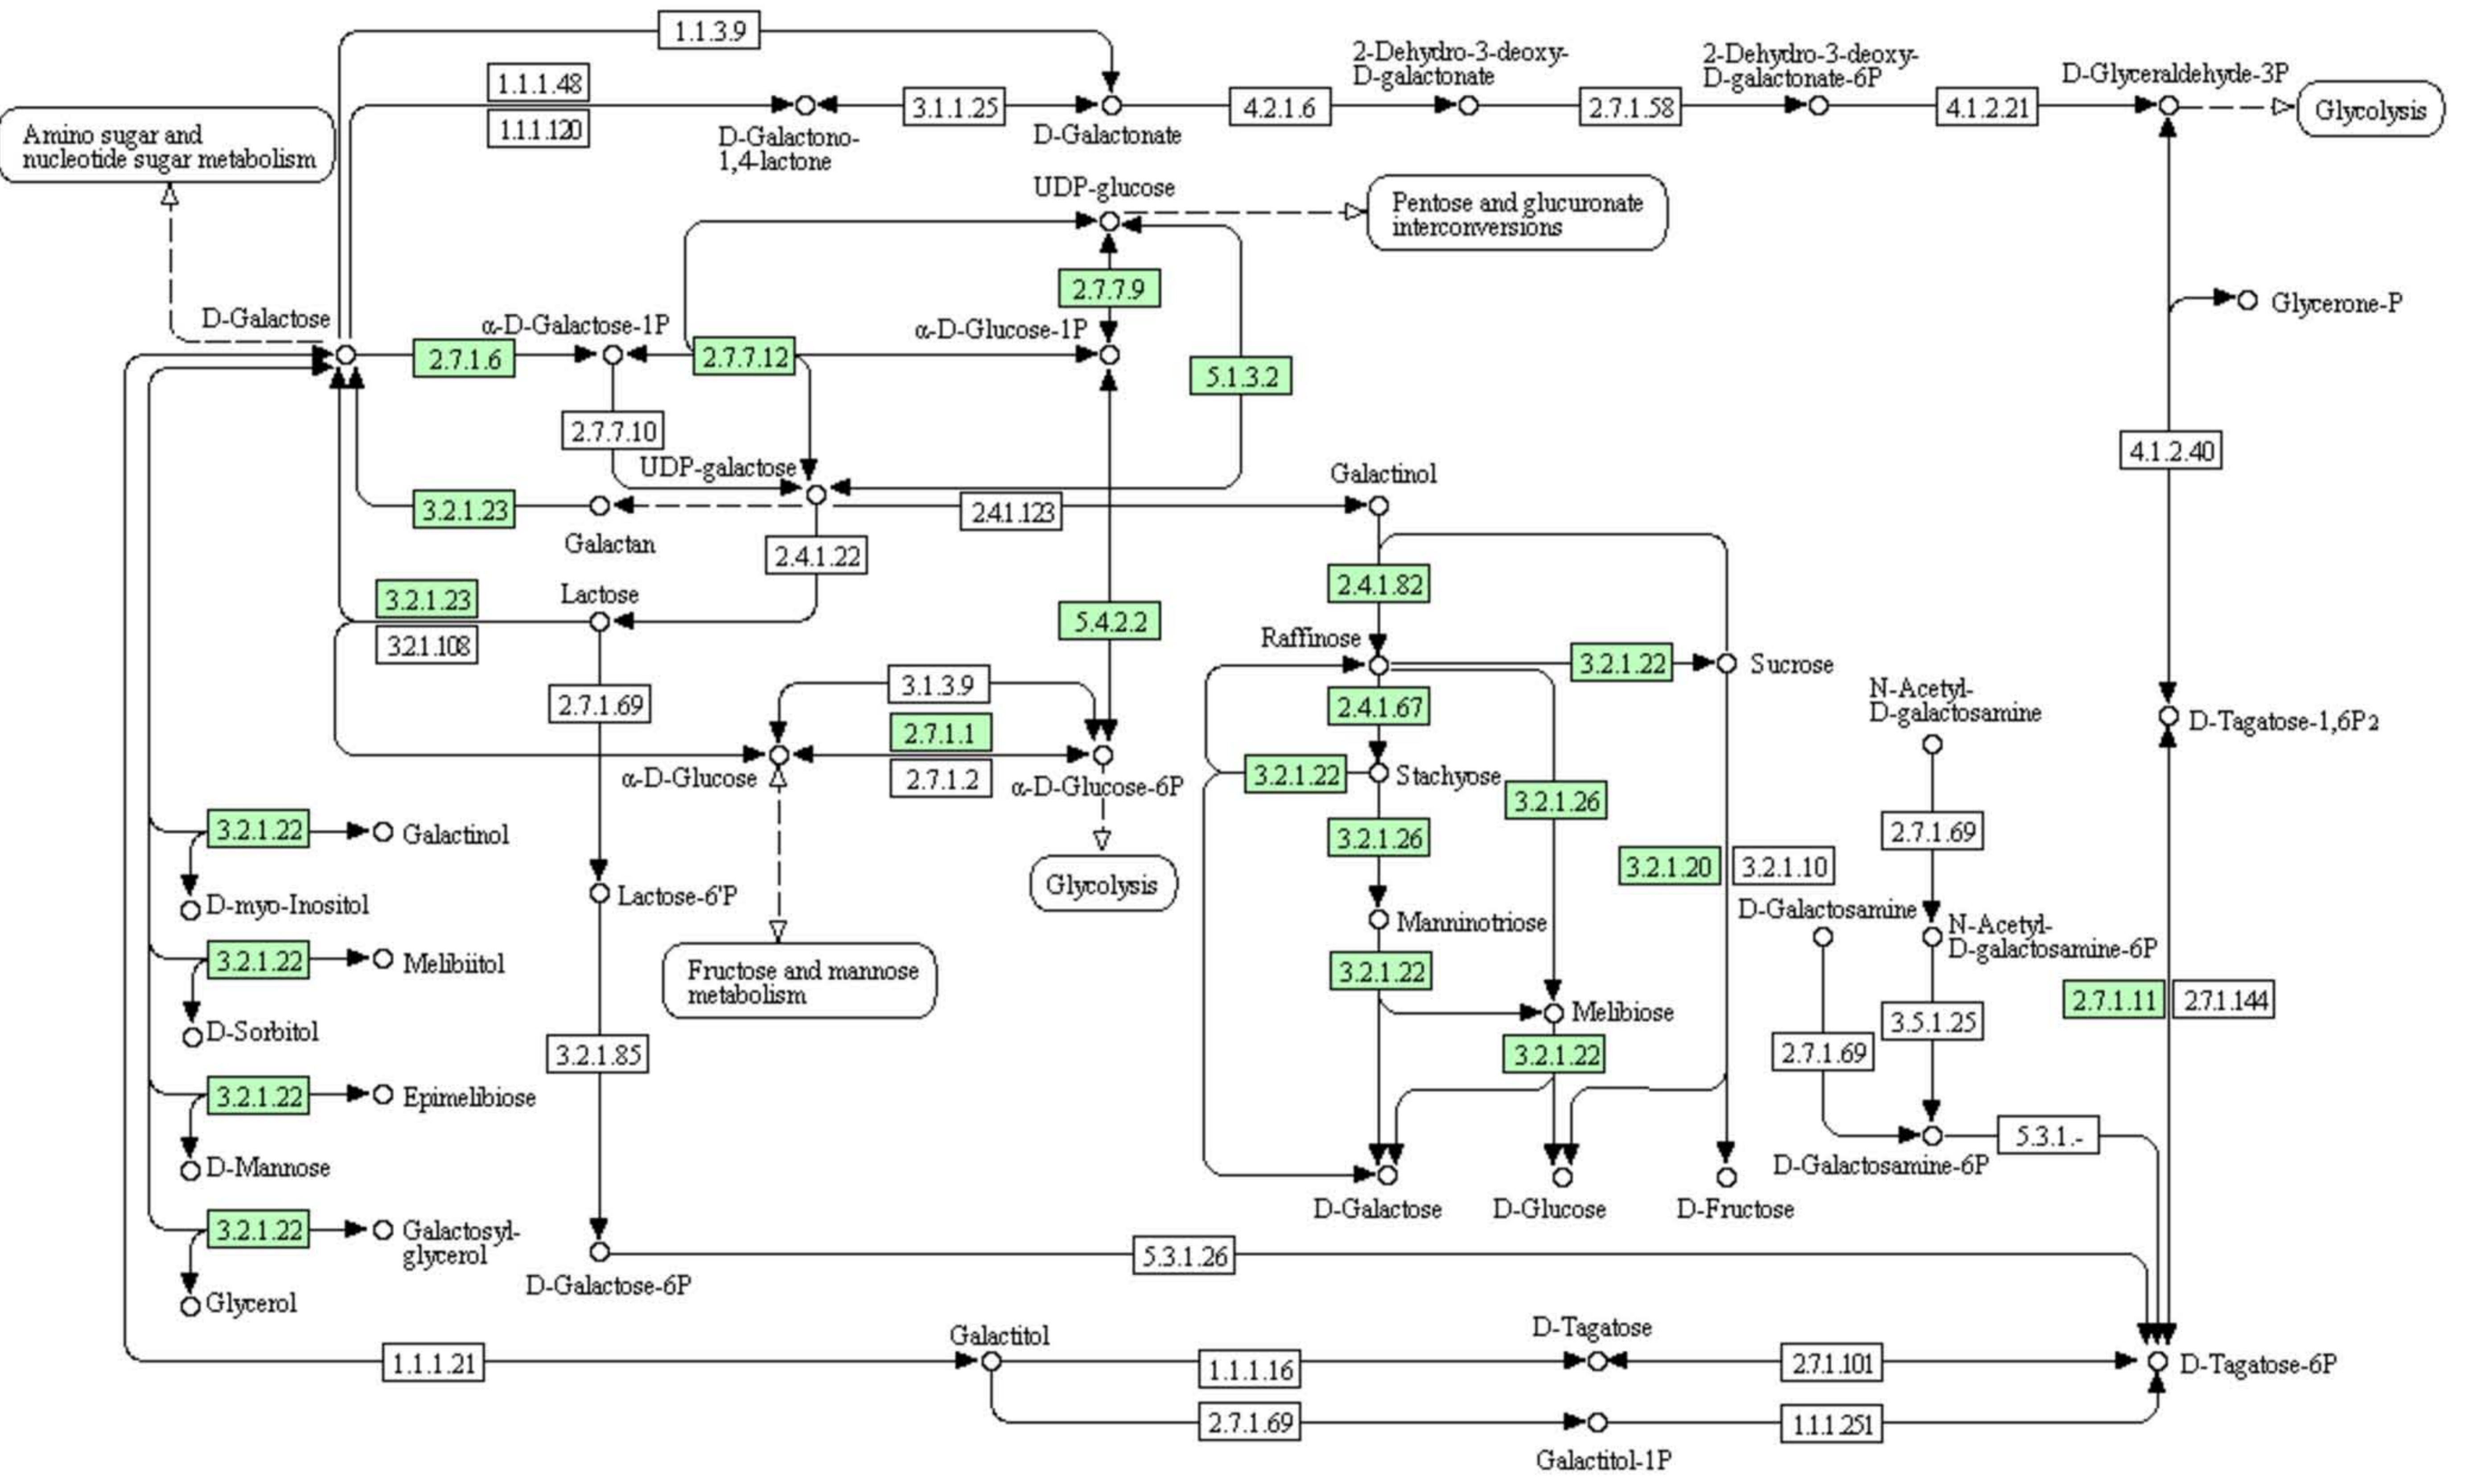



# GERANIOL DEGRADATION

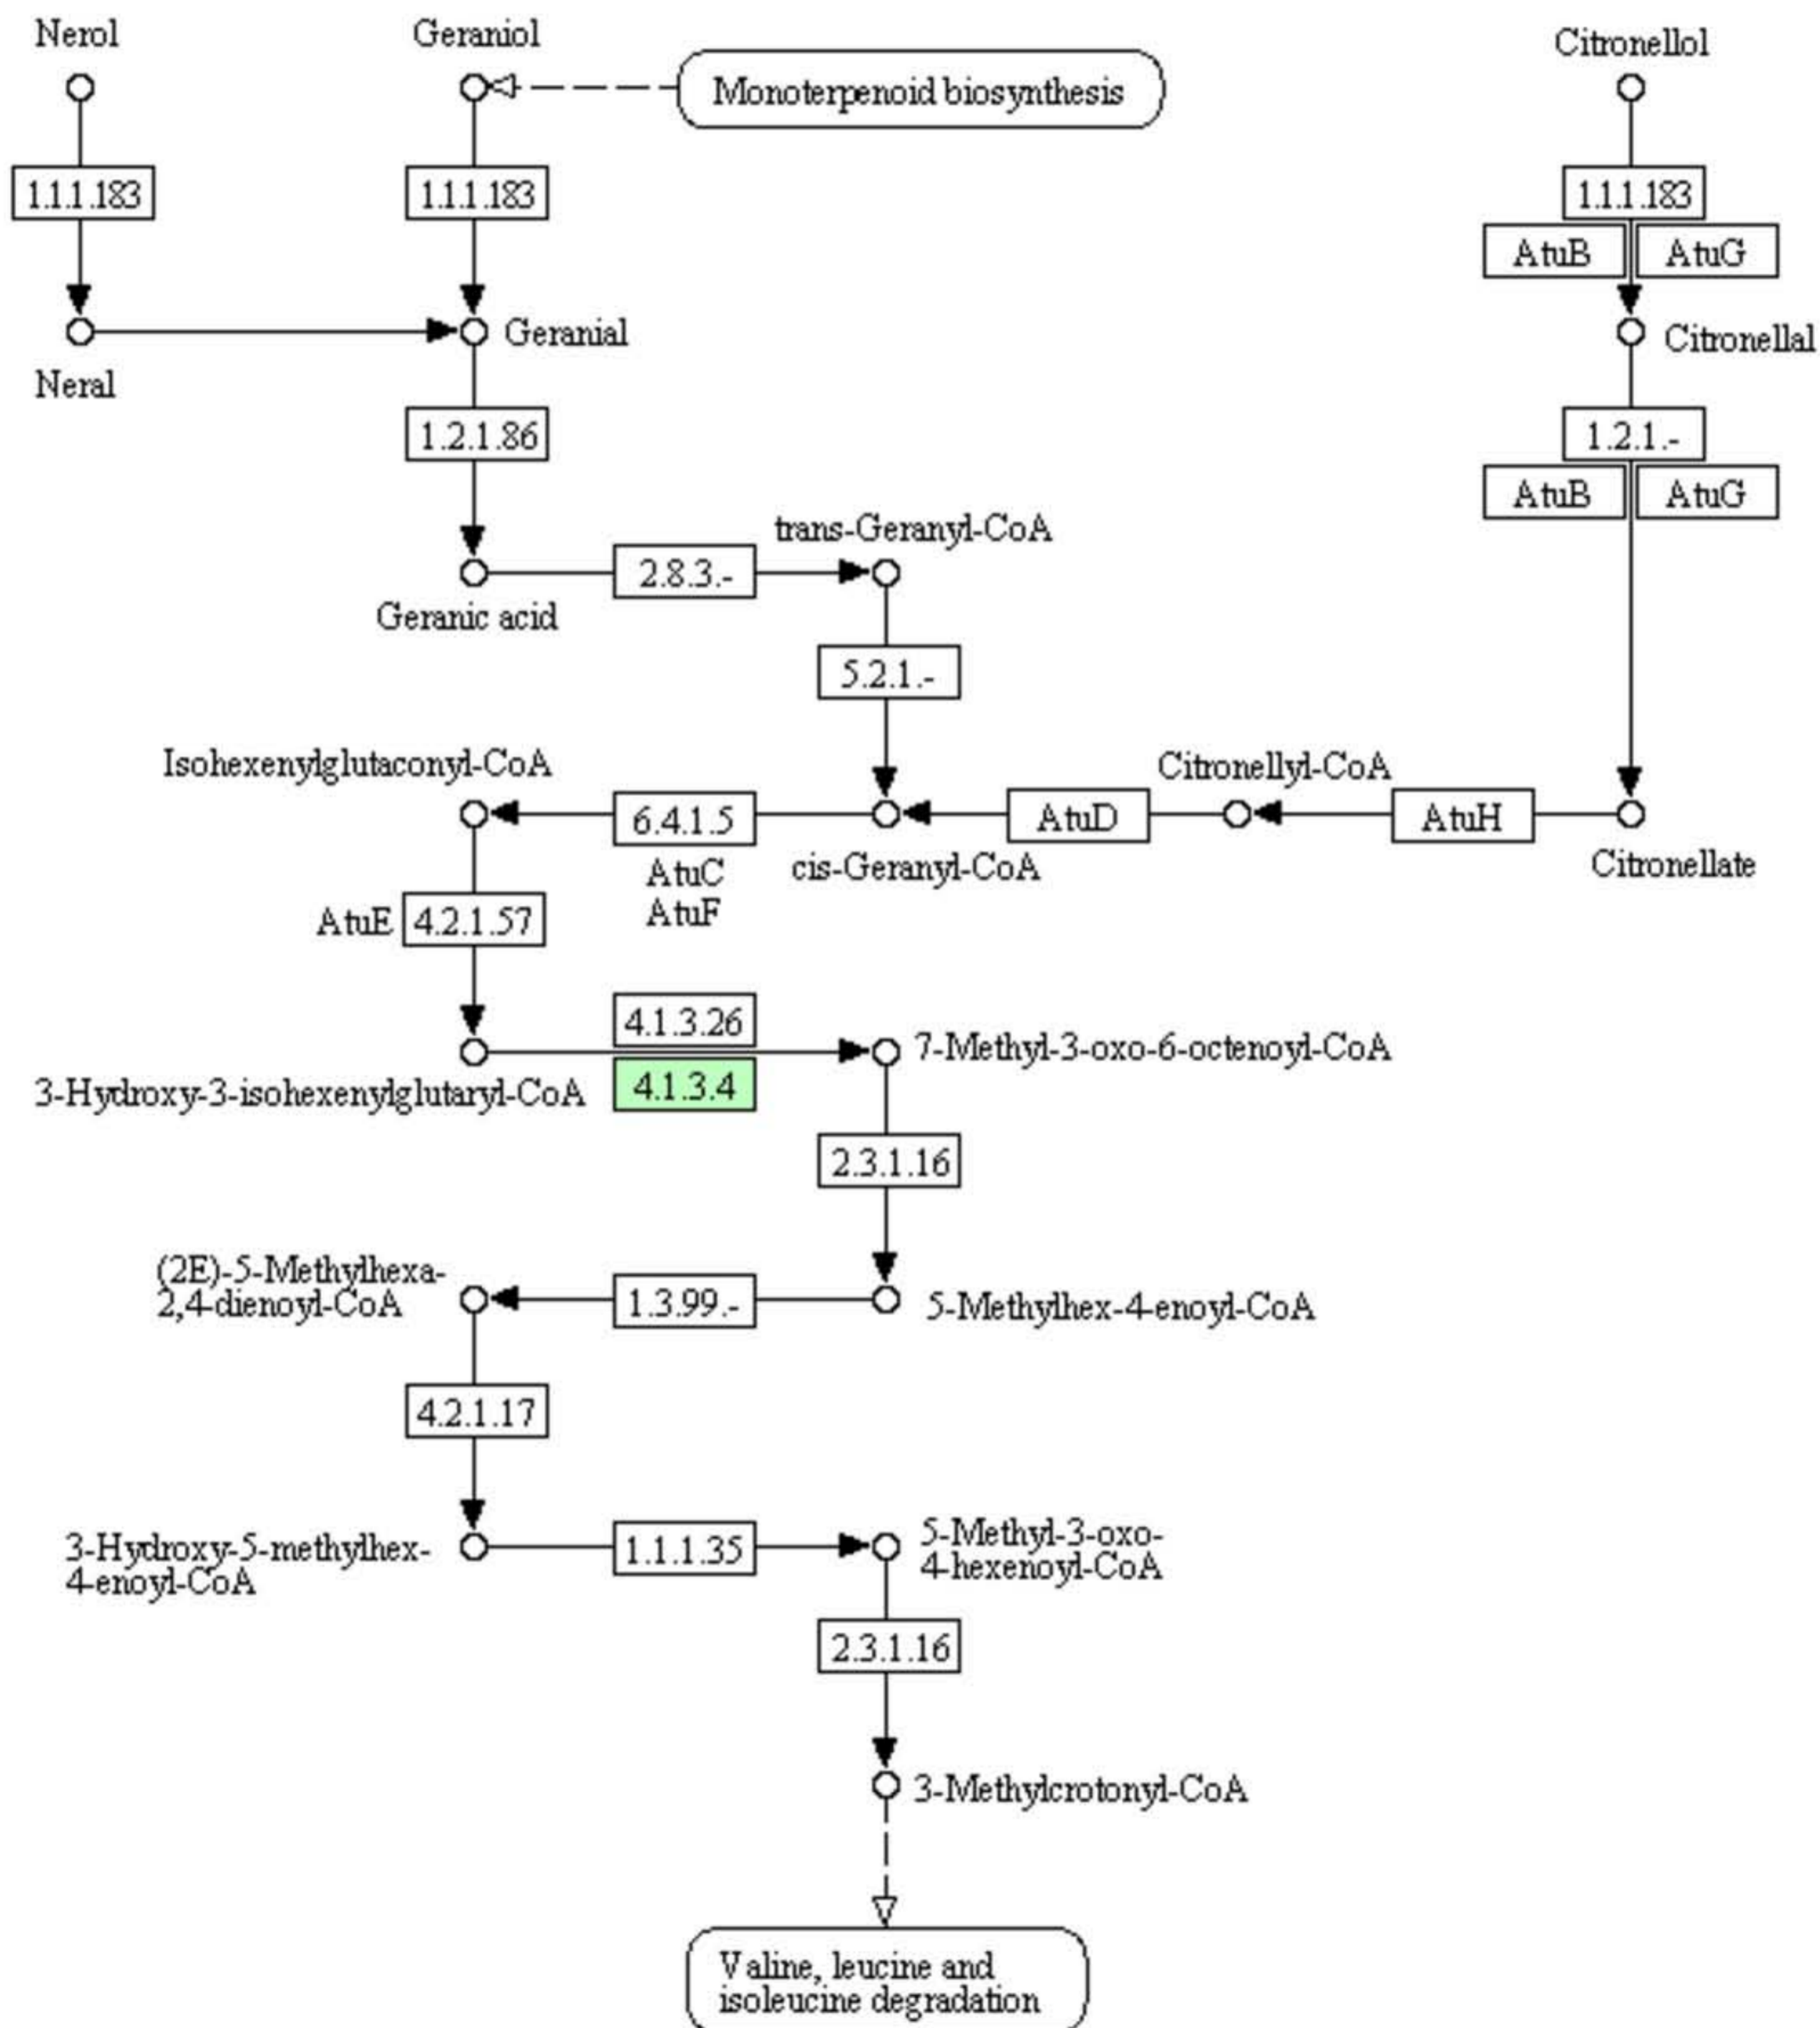



# GLUCOSINOLATE BIOSYNTHESIS

## From methionine

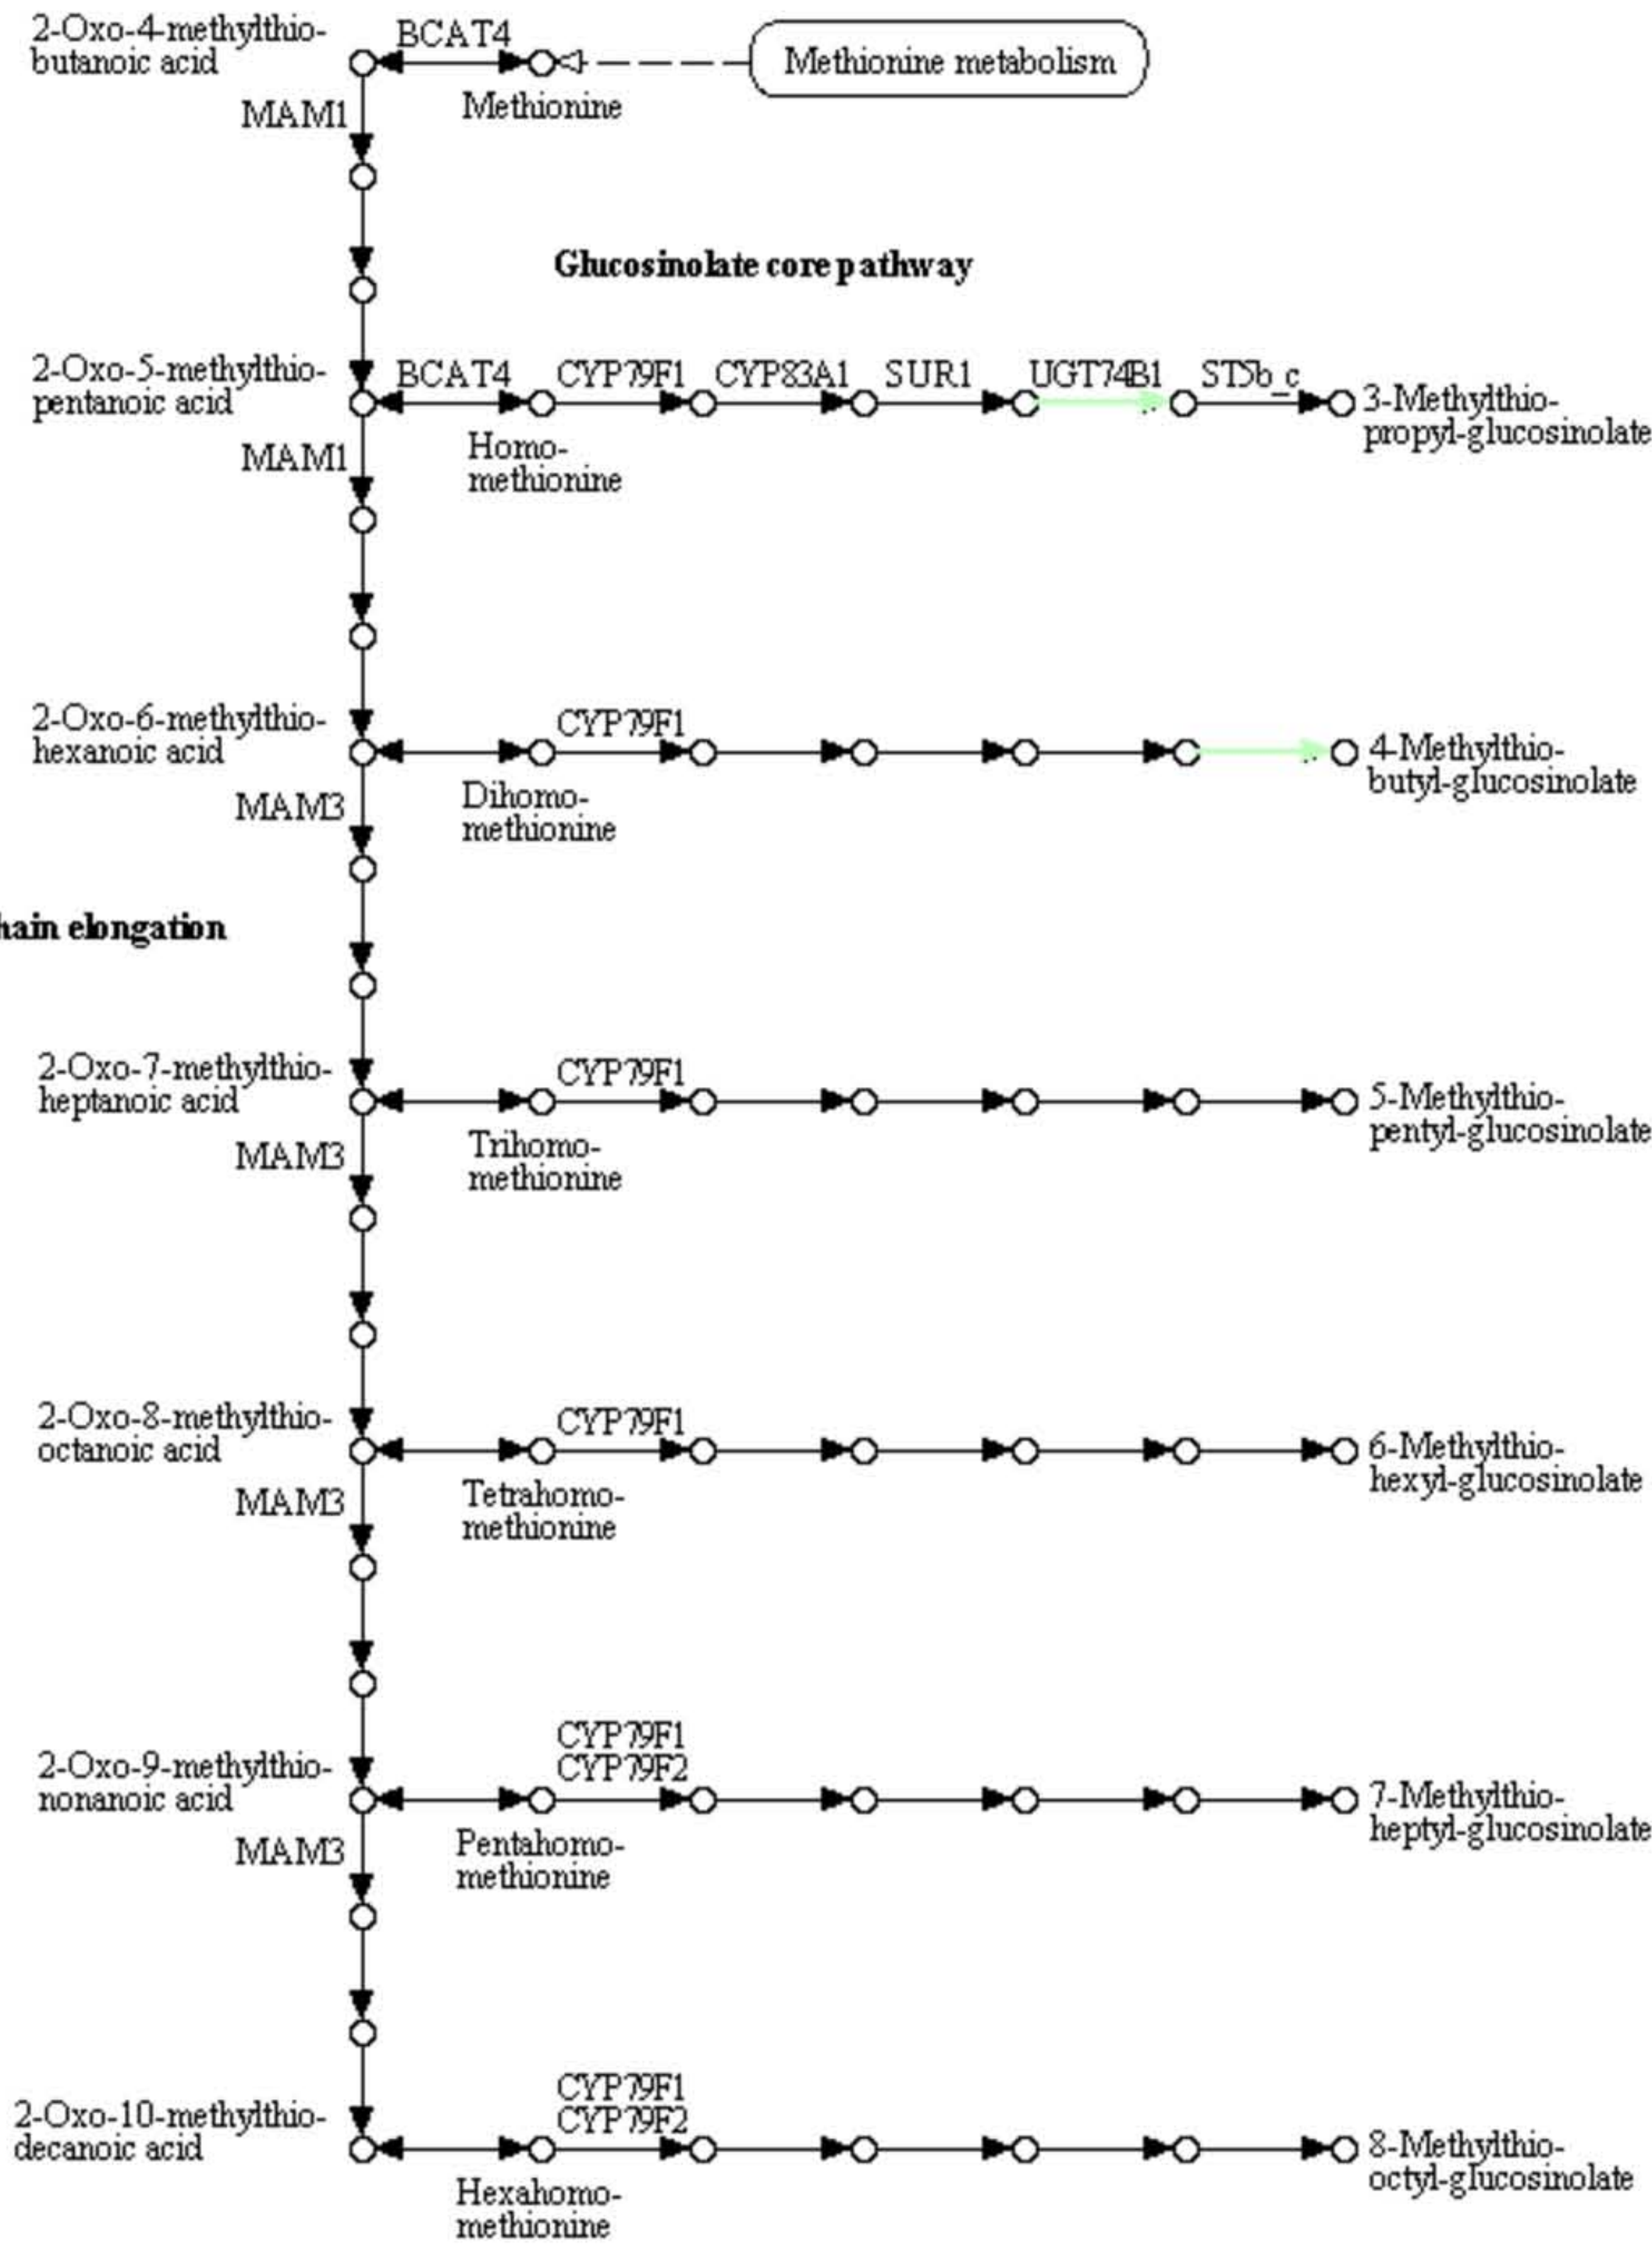

## From branched-chain amino acids

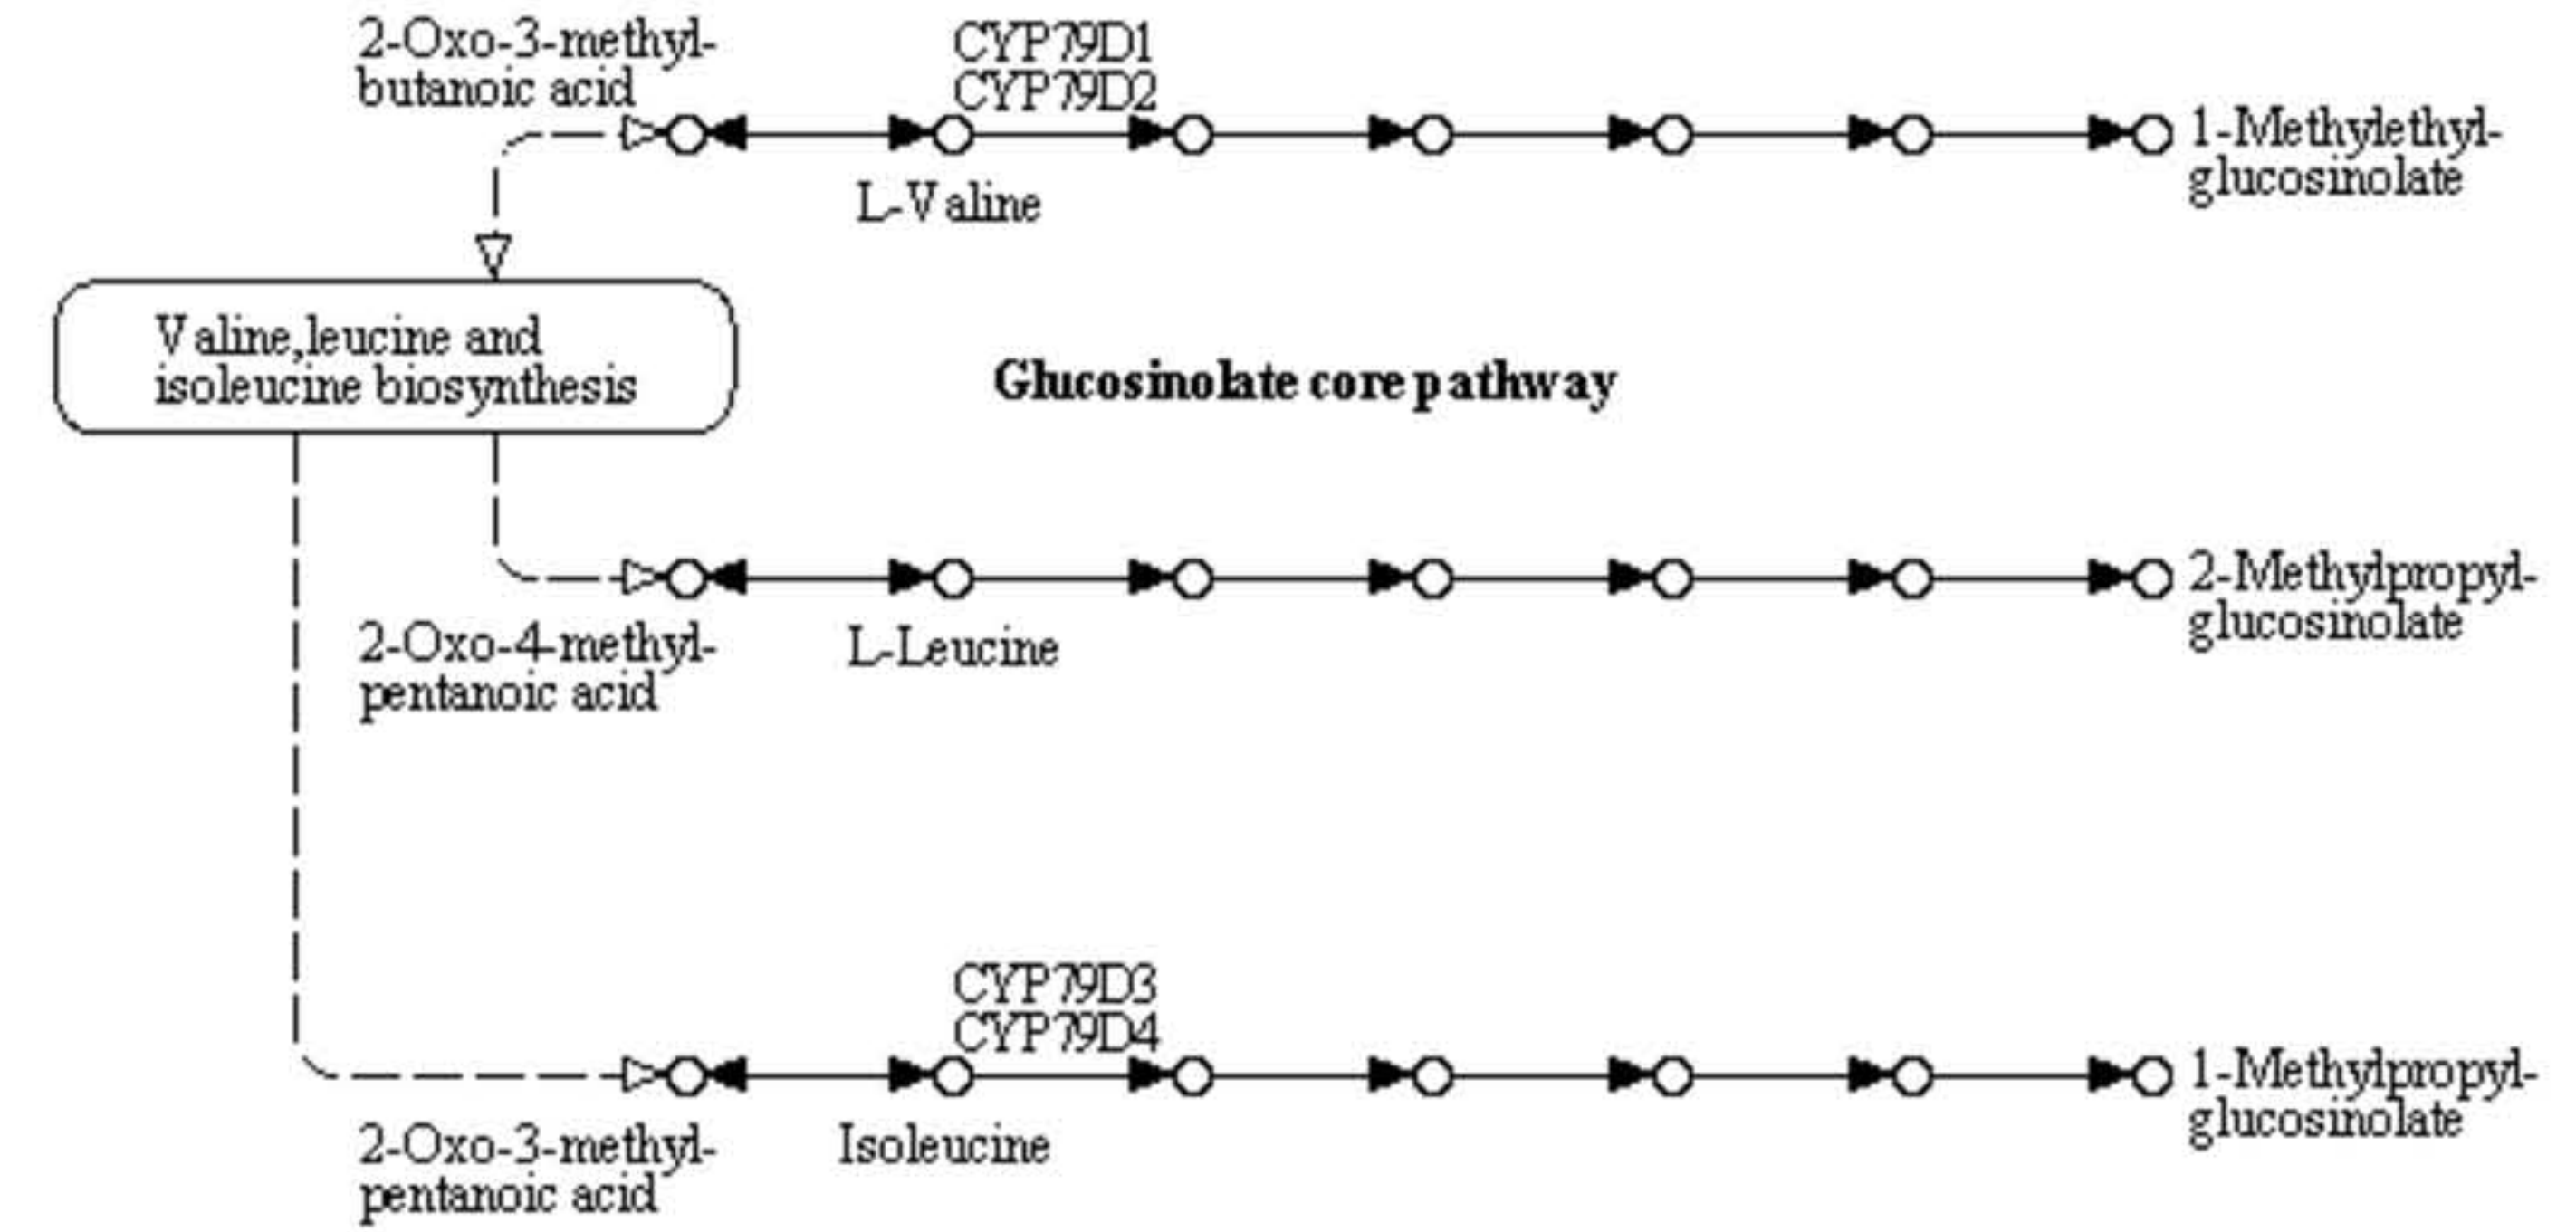

## From aromatic amino acid

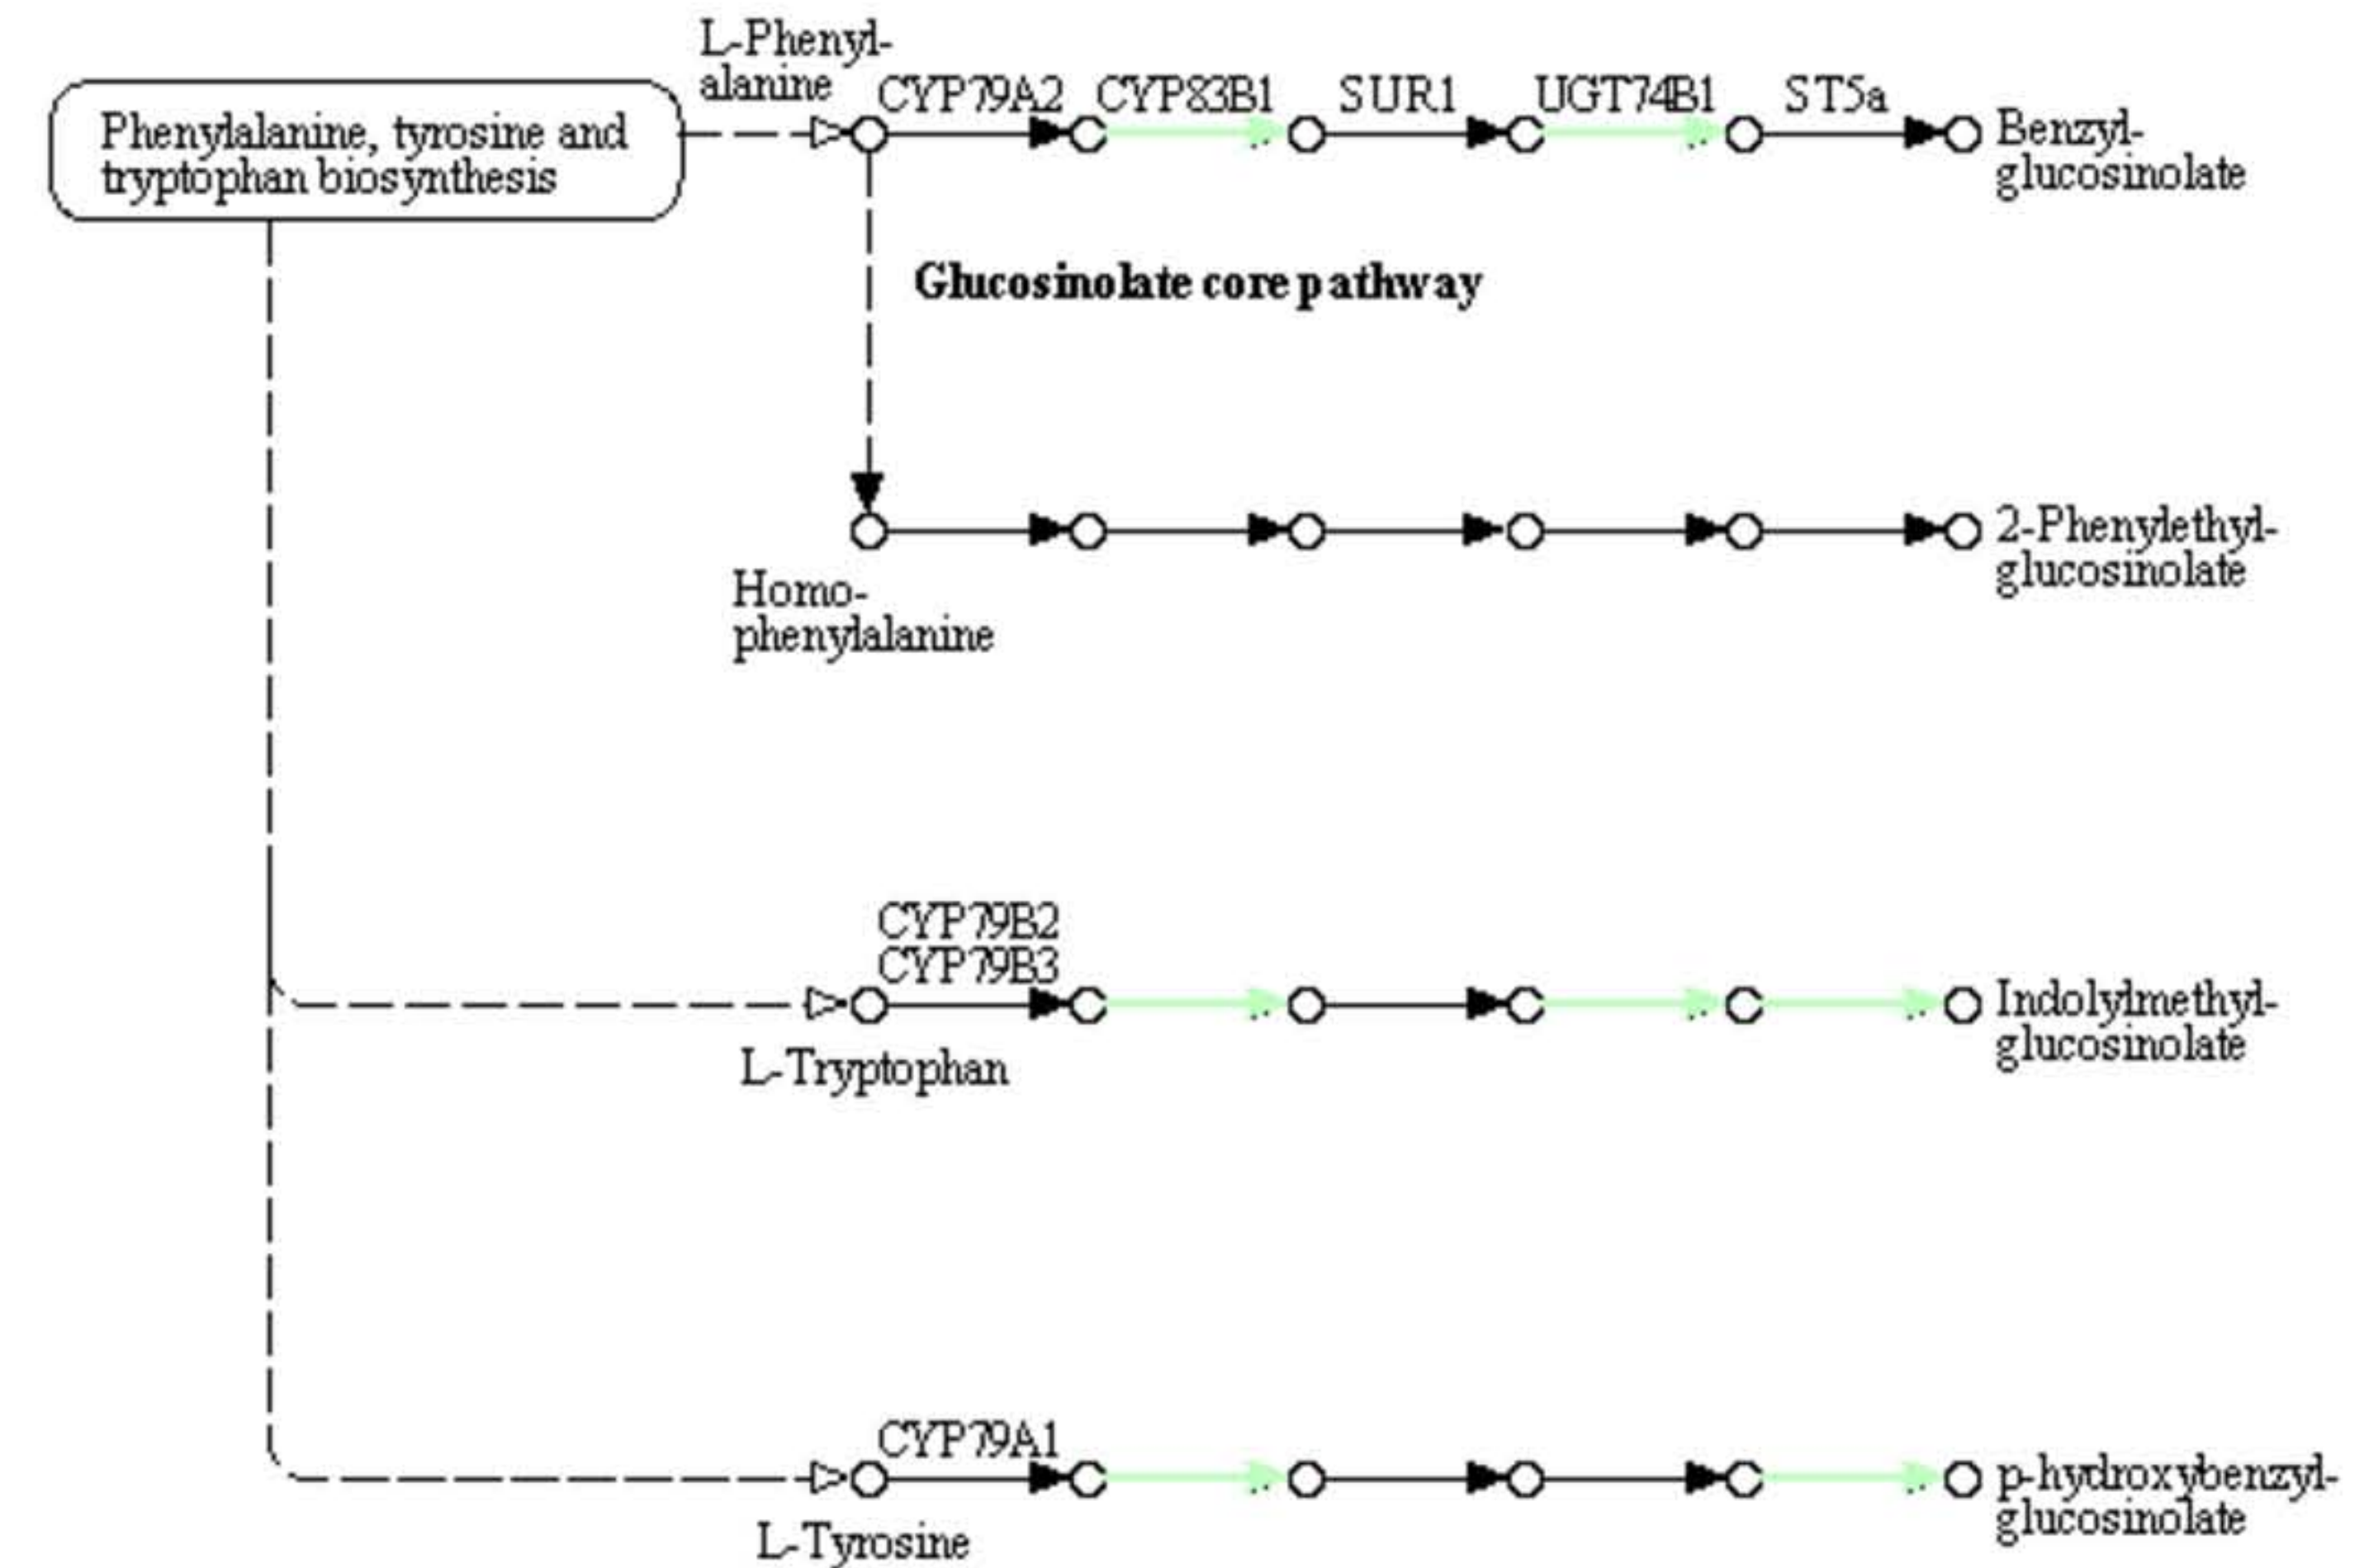



# GLUTATHIONE METABOLISM

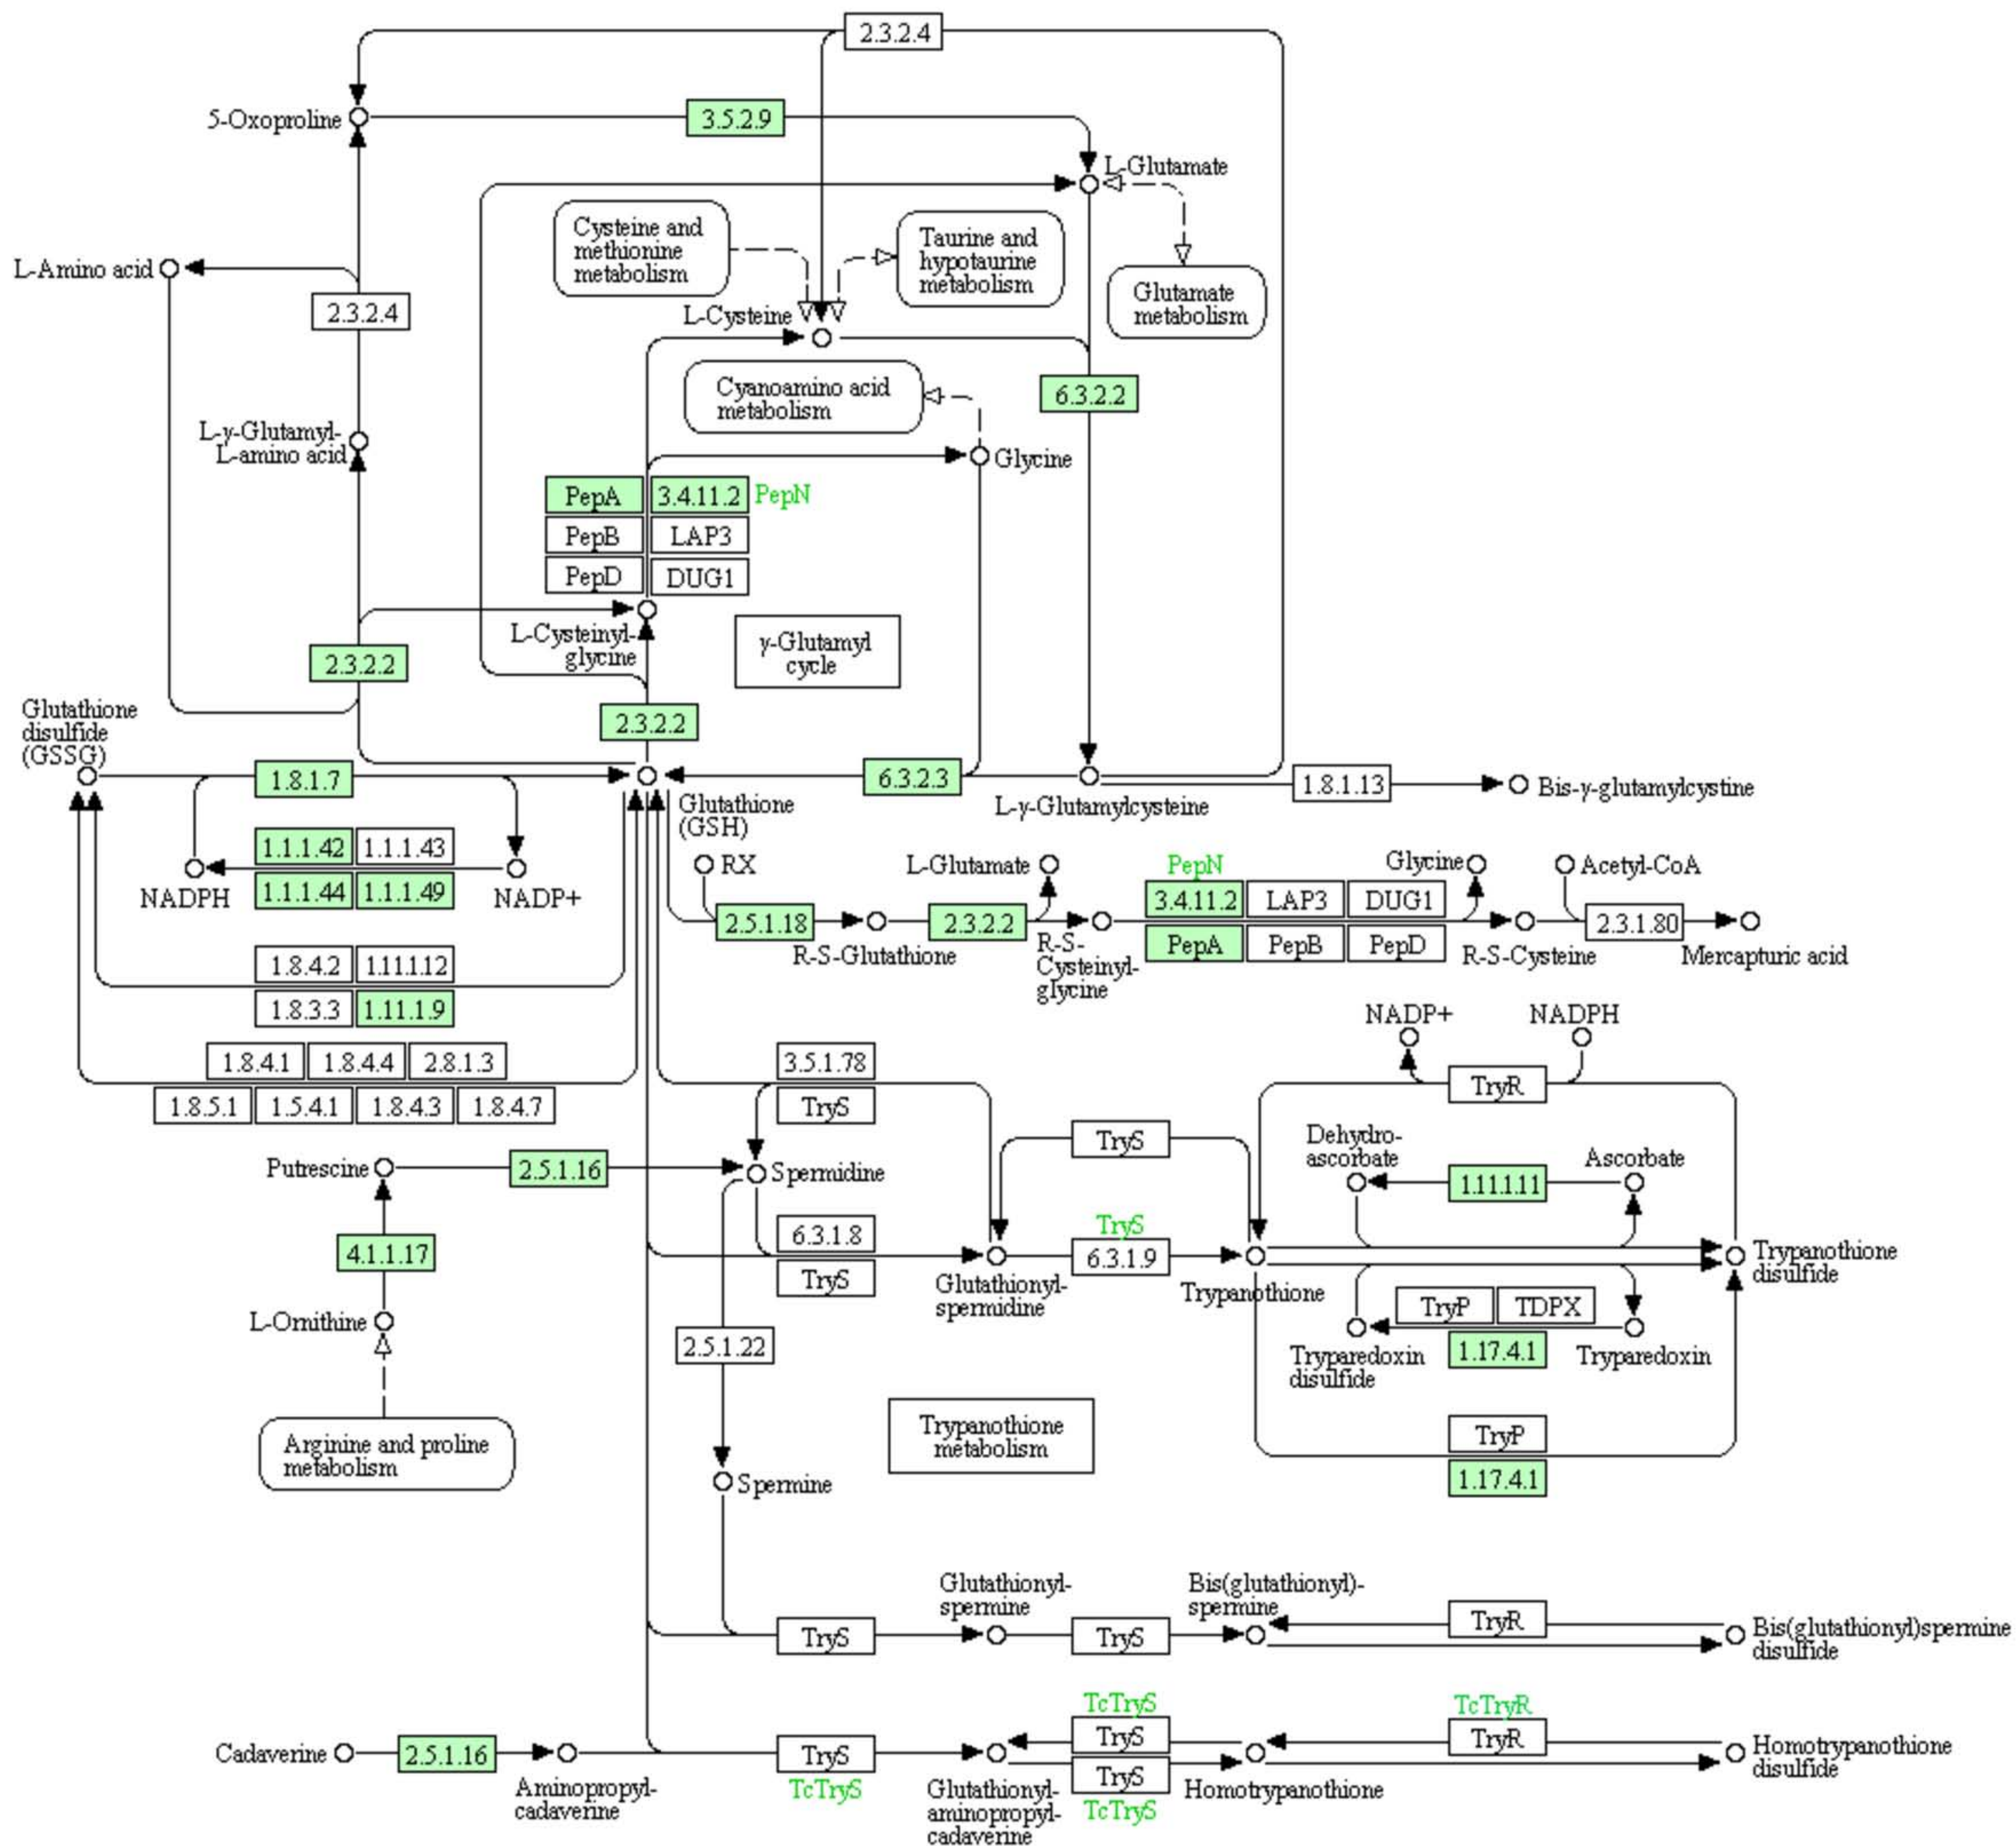



# GLYCEROLIPID METABOLISM

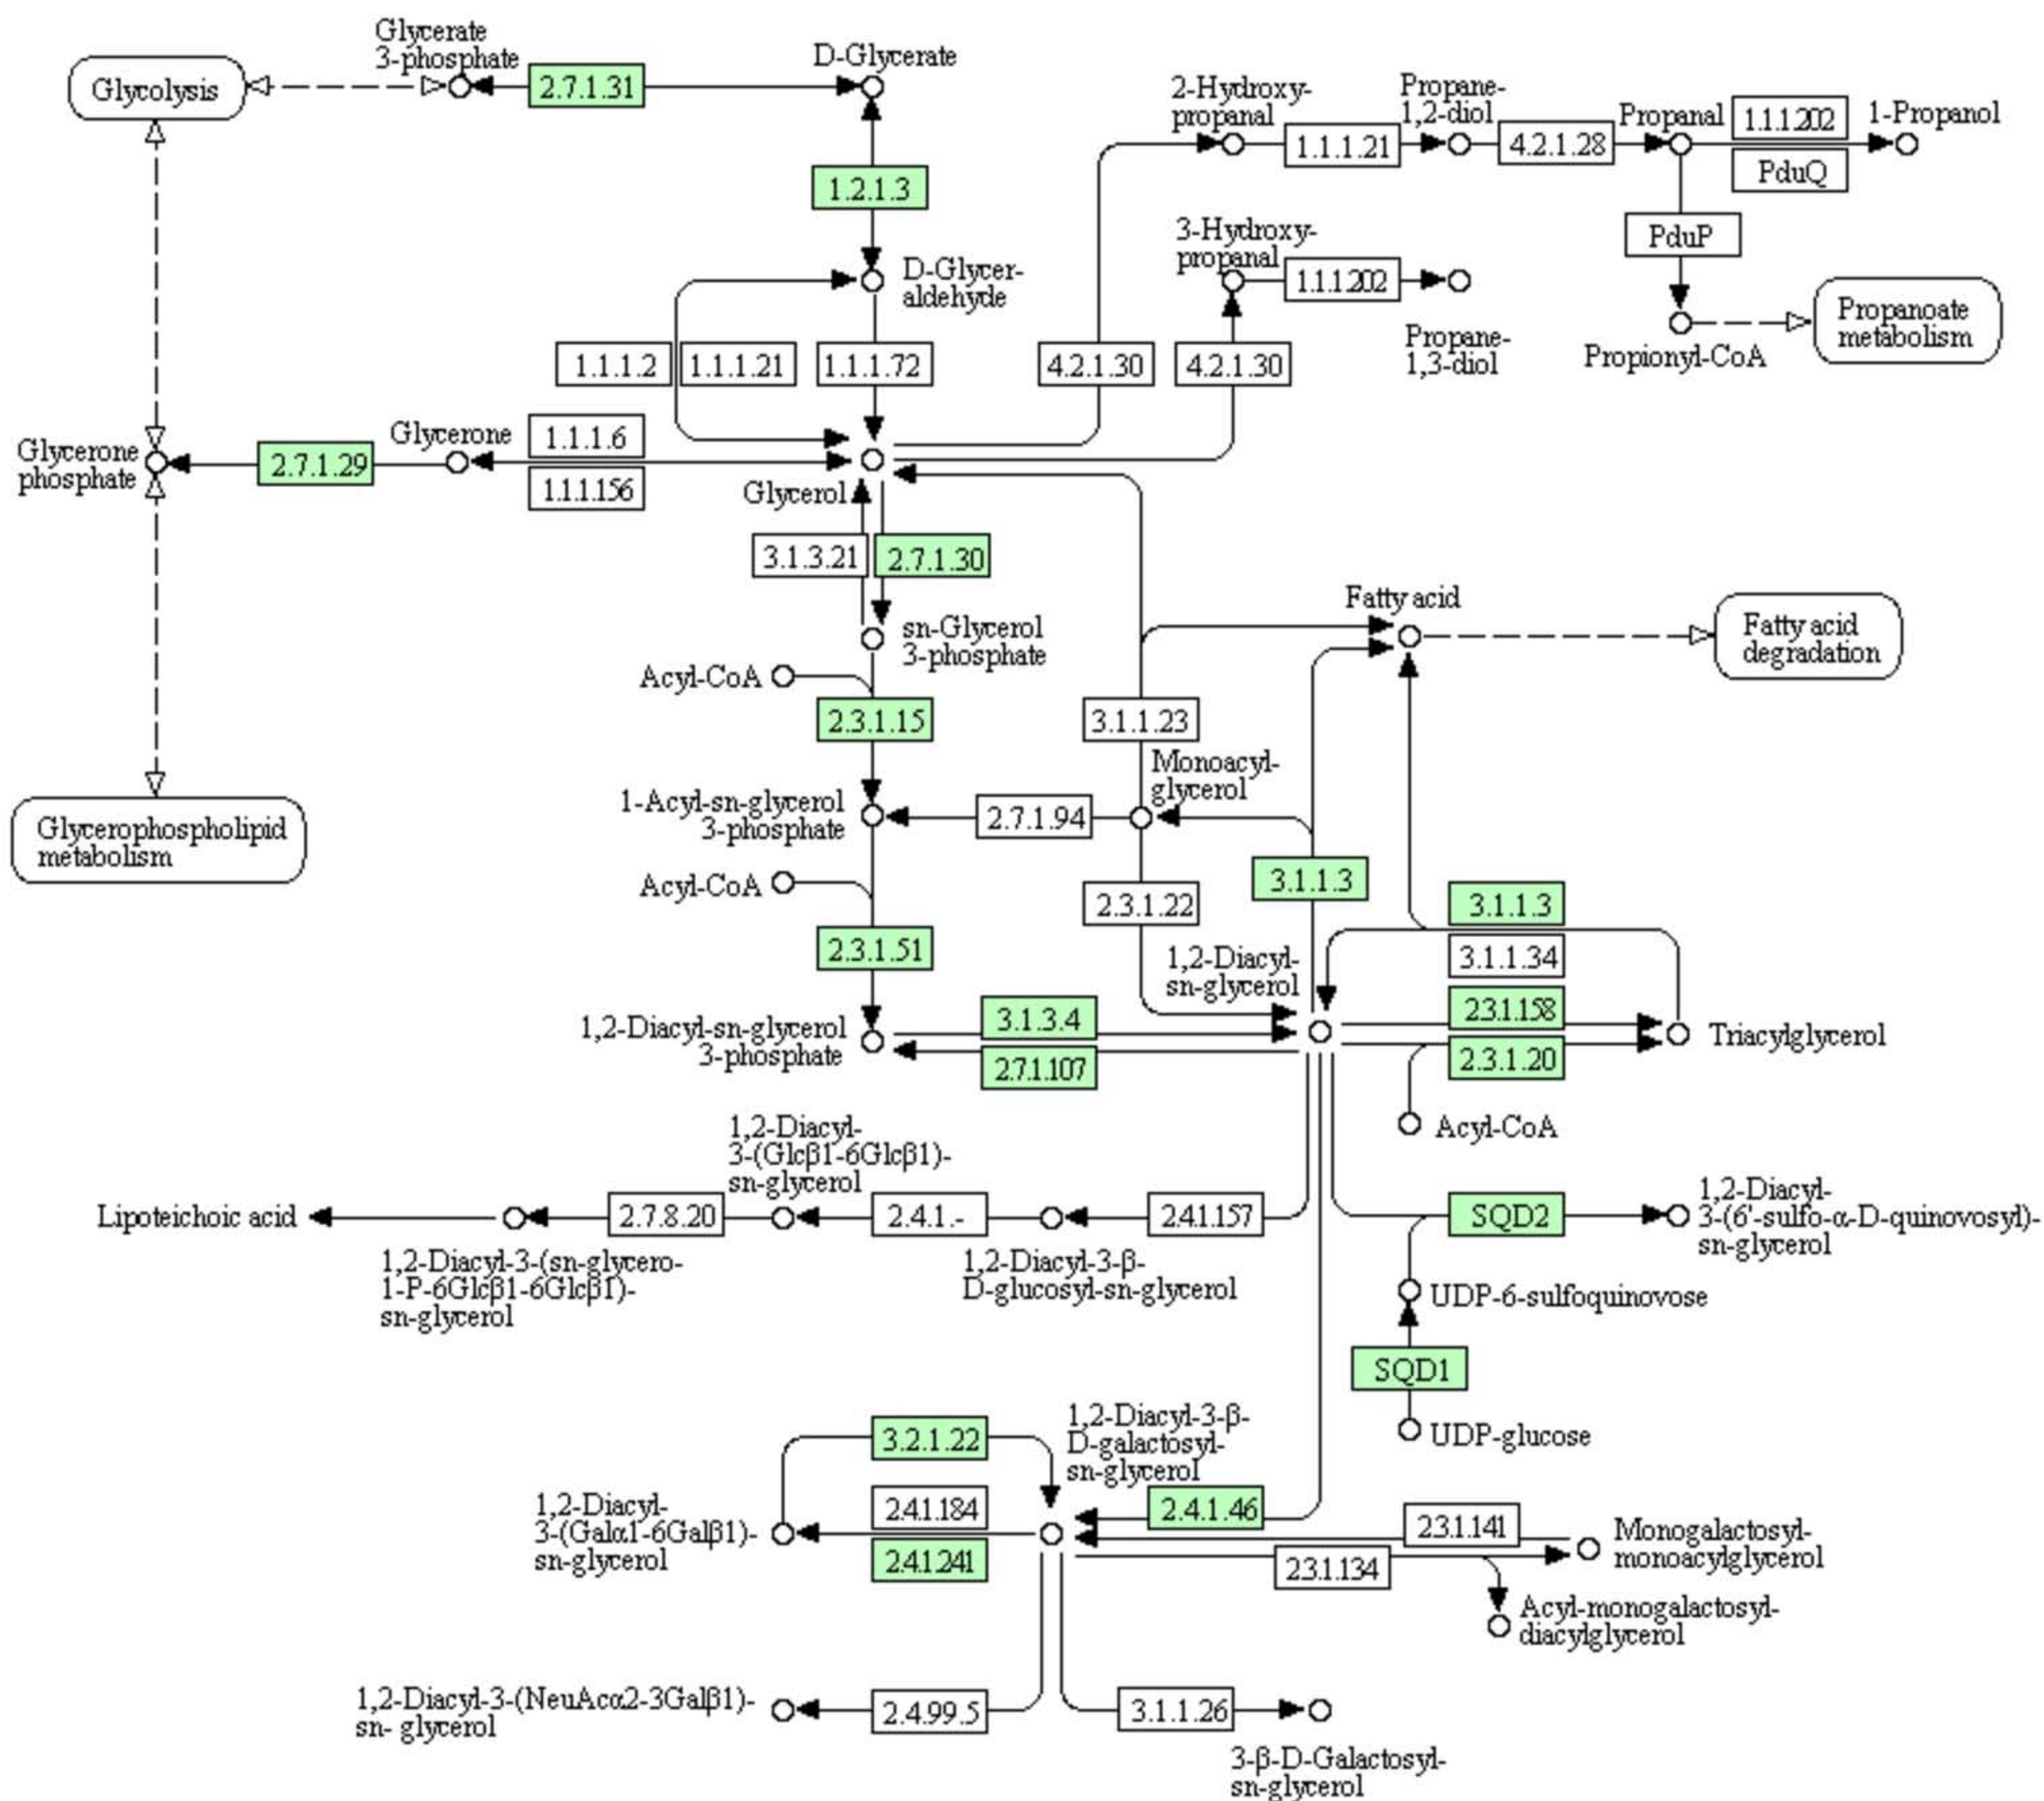







GLYCINE, SERINE AND THREONINE METABOLISM

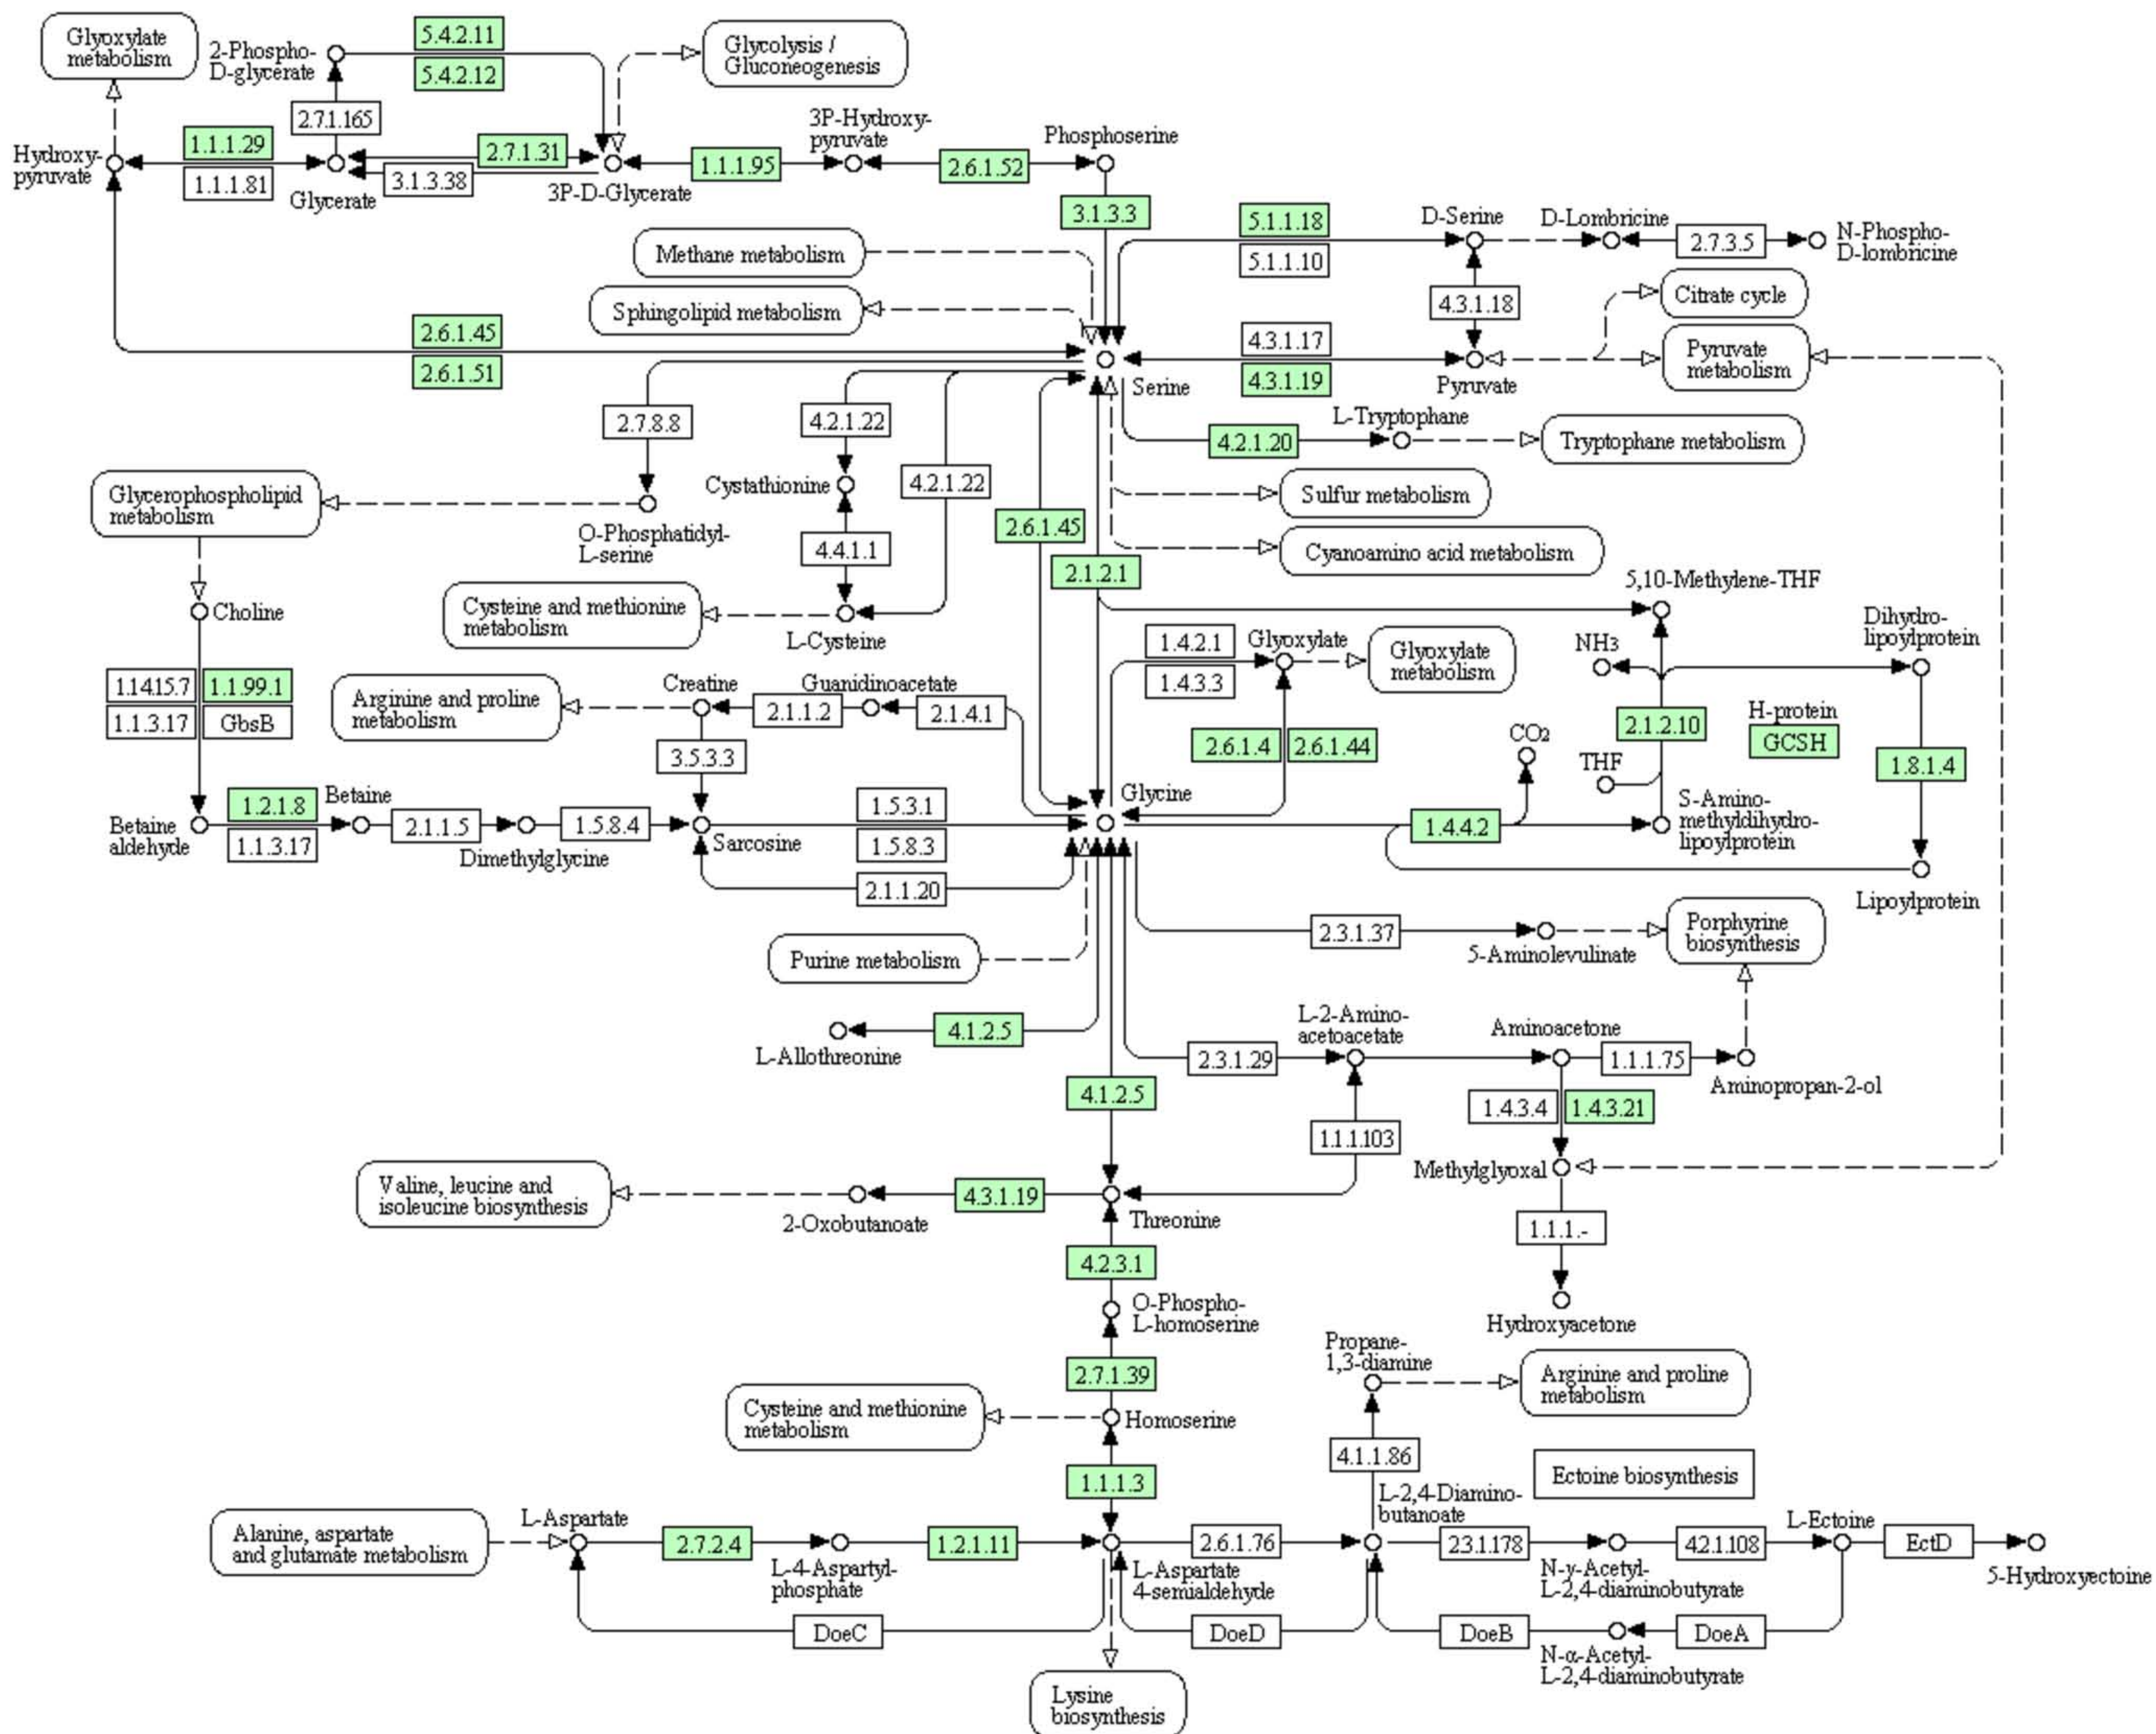



**GLYCOLYSIS / GLUCONEOGENESIS**

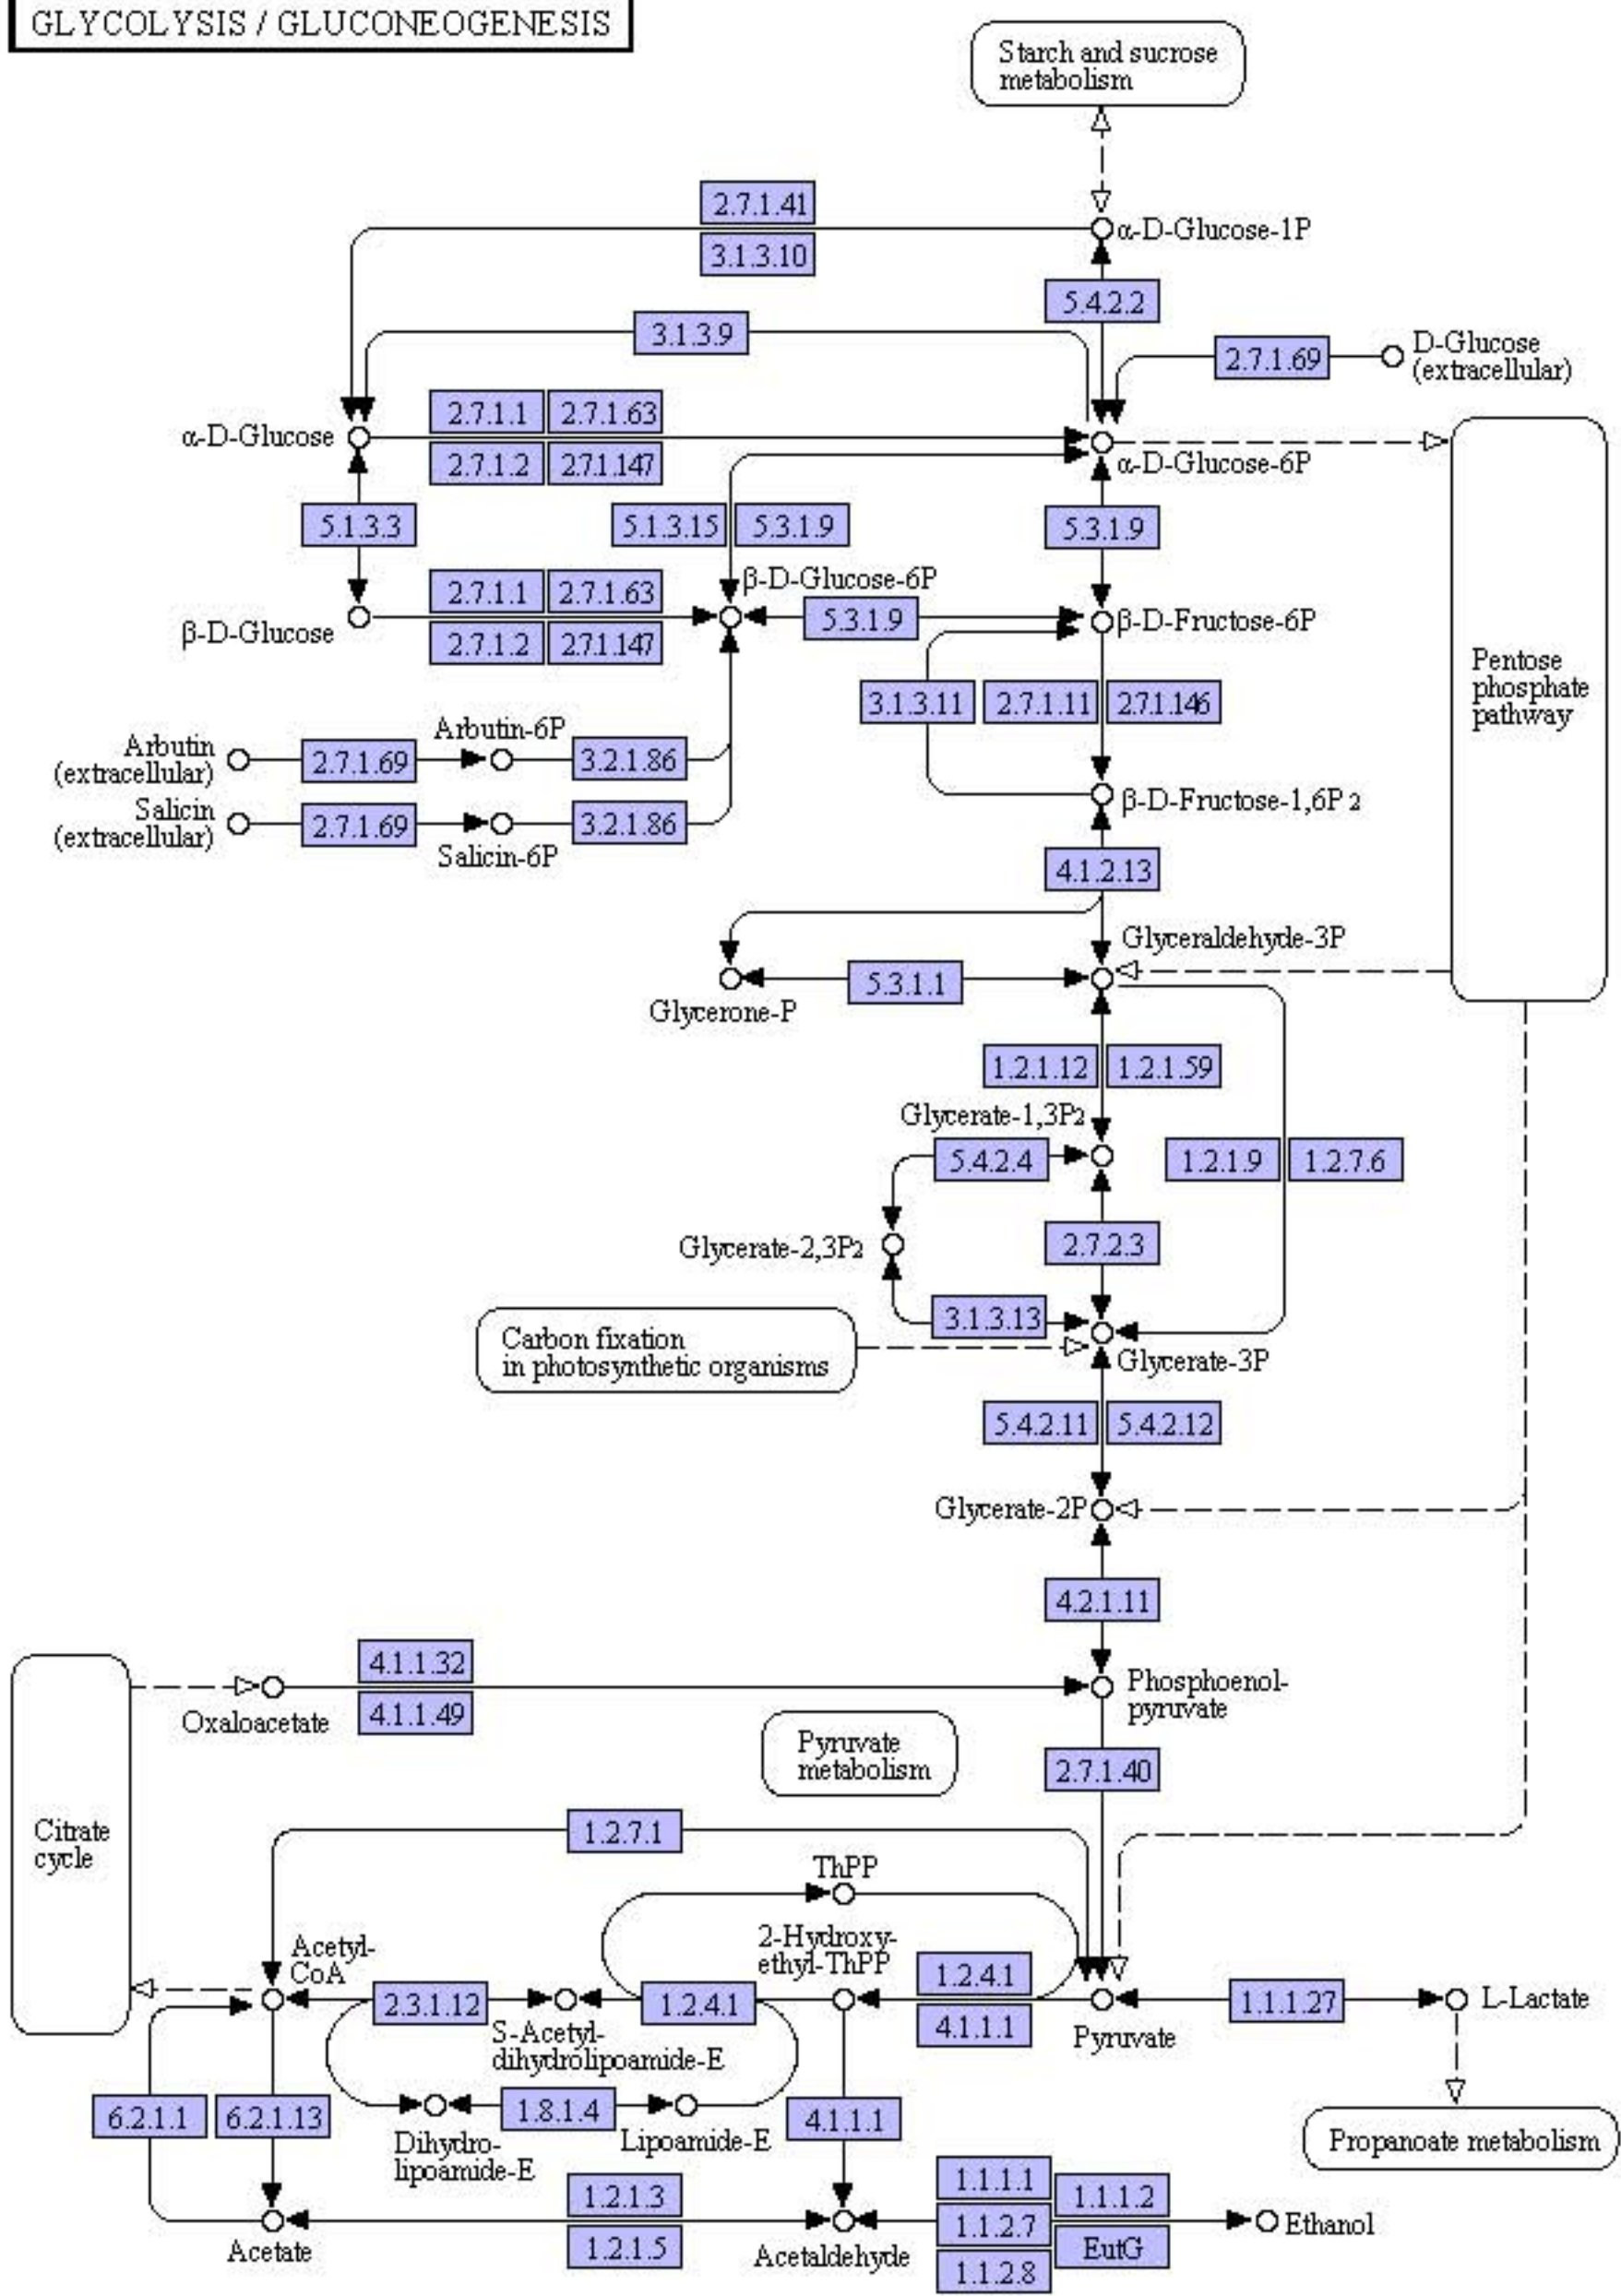















# GLYCOSYLPHOSPHATIDYLINOSITOL (GPI) - ANCHOR BIOSYNTHESIS

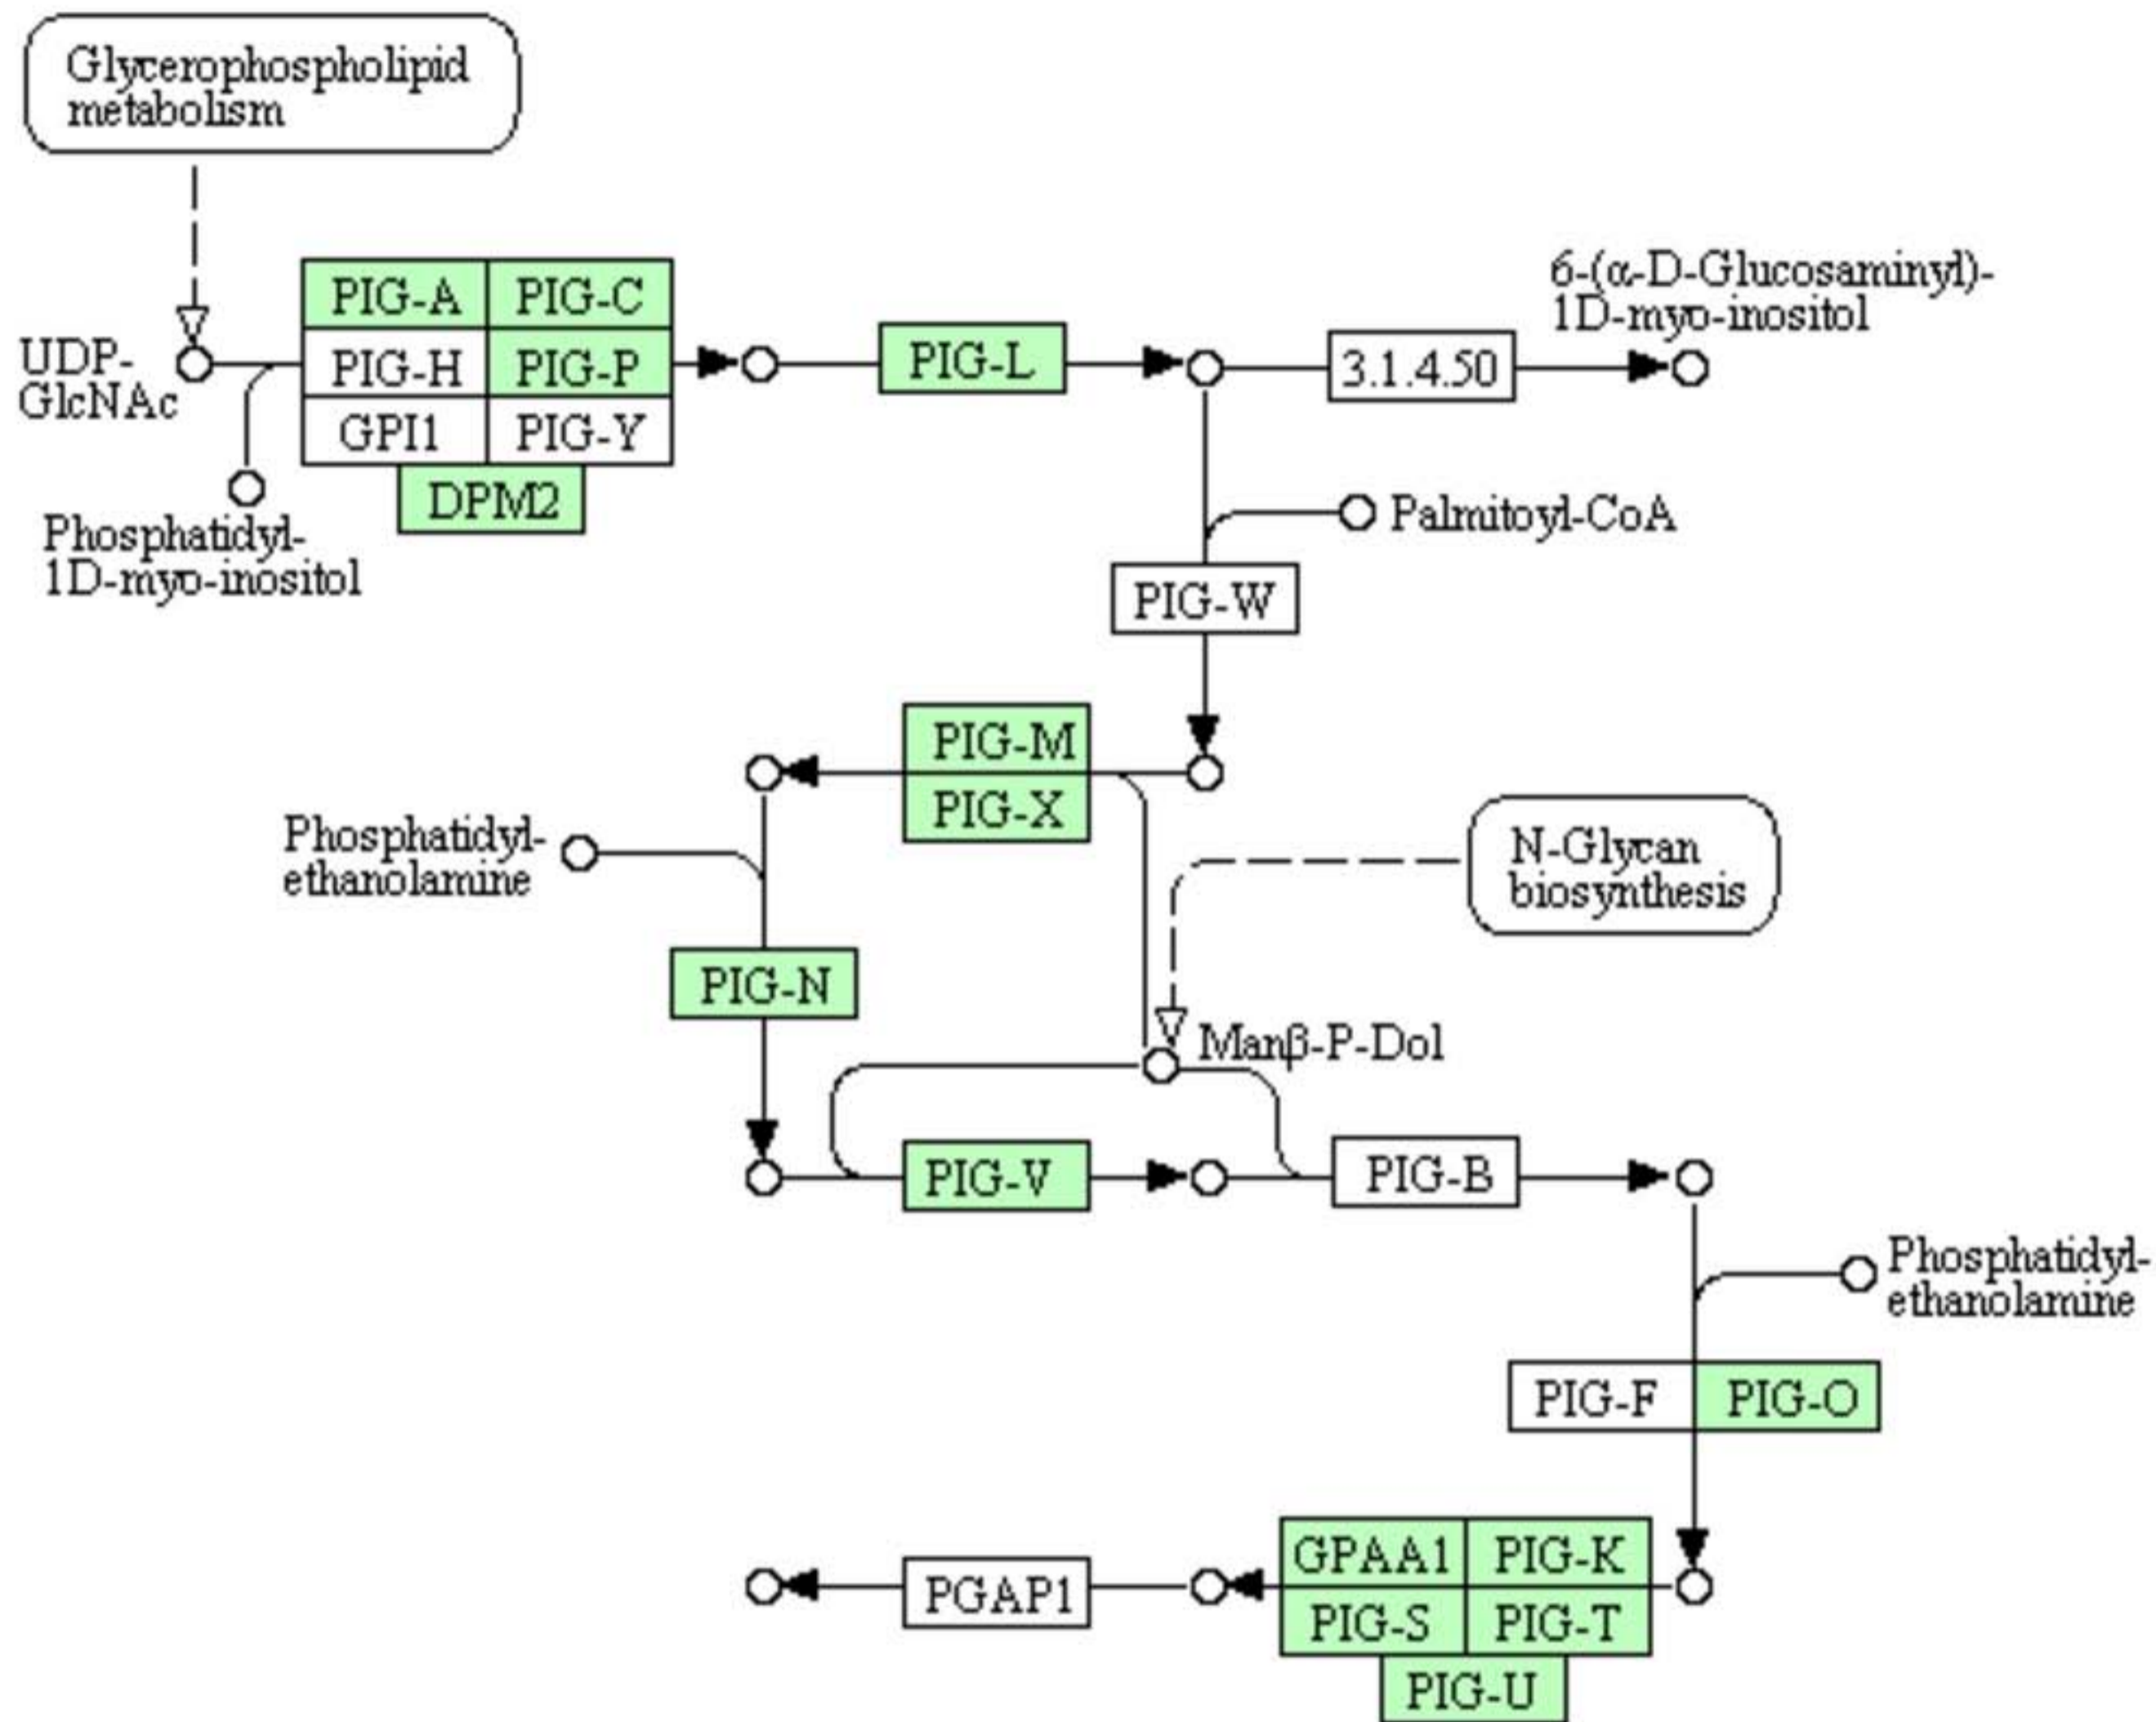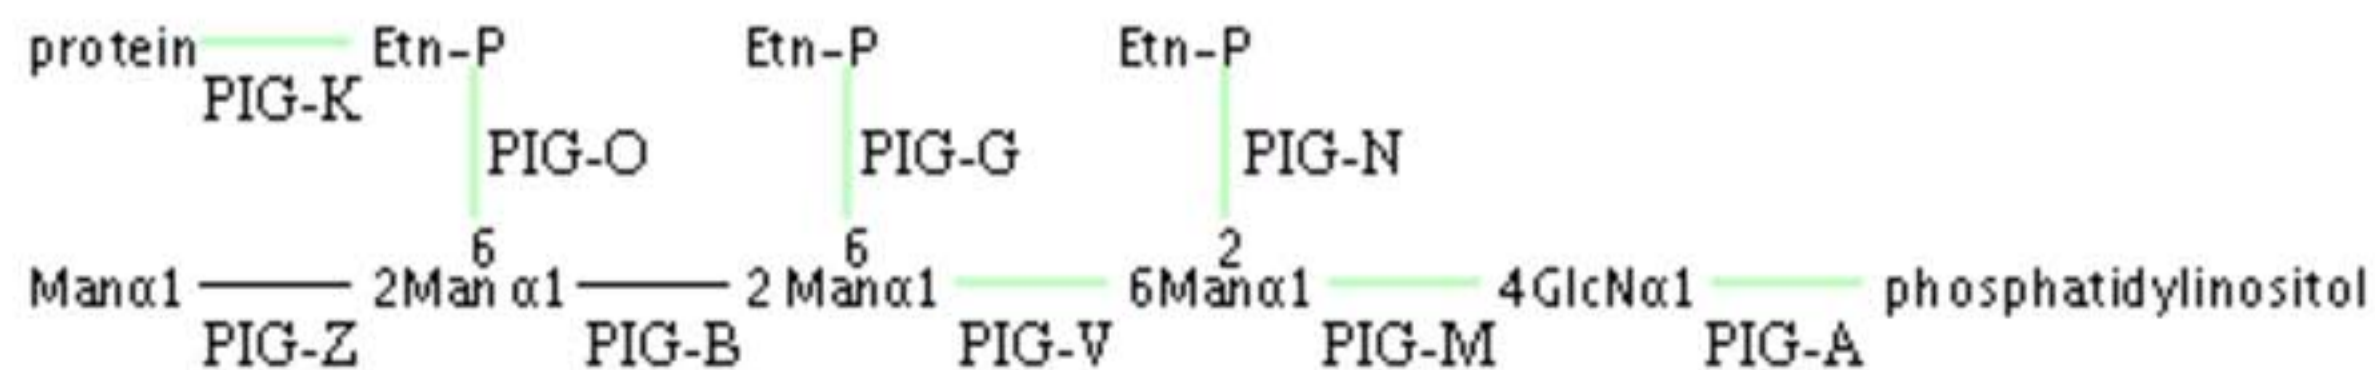



# GLYOXYLATE AND DICARBOXYLATE METABOLISM

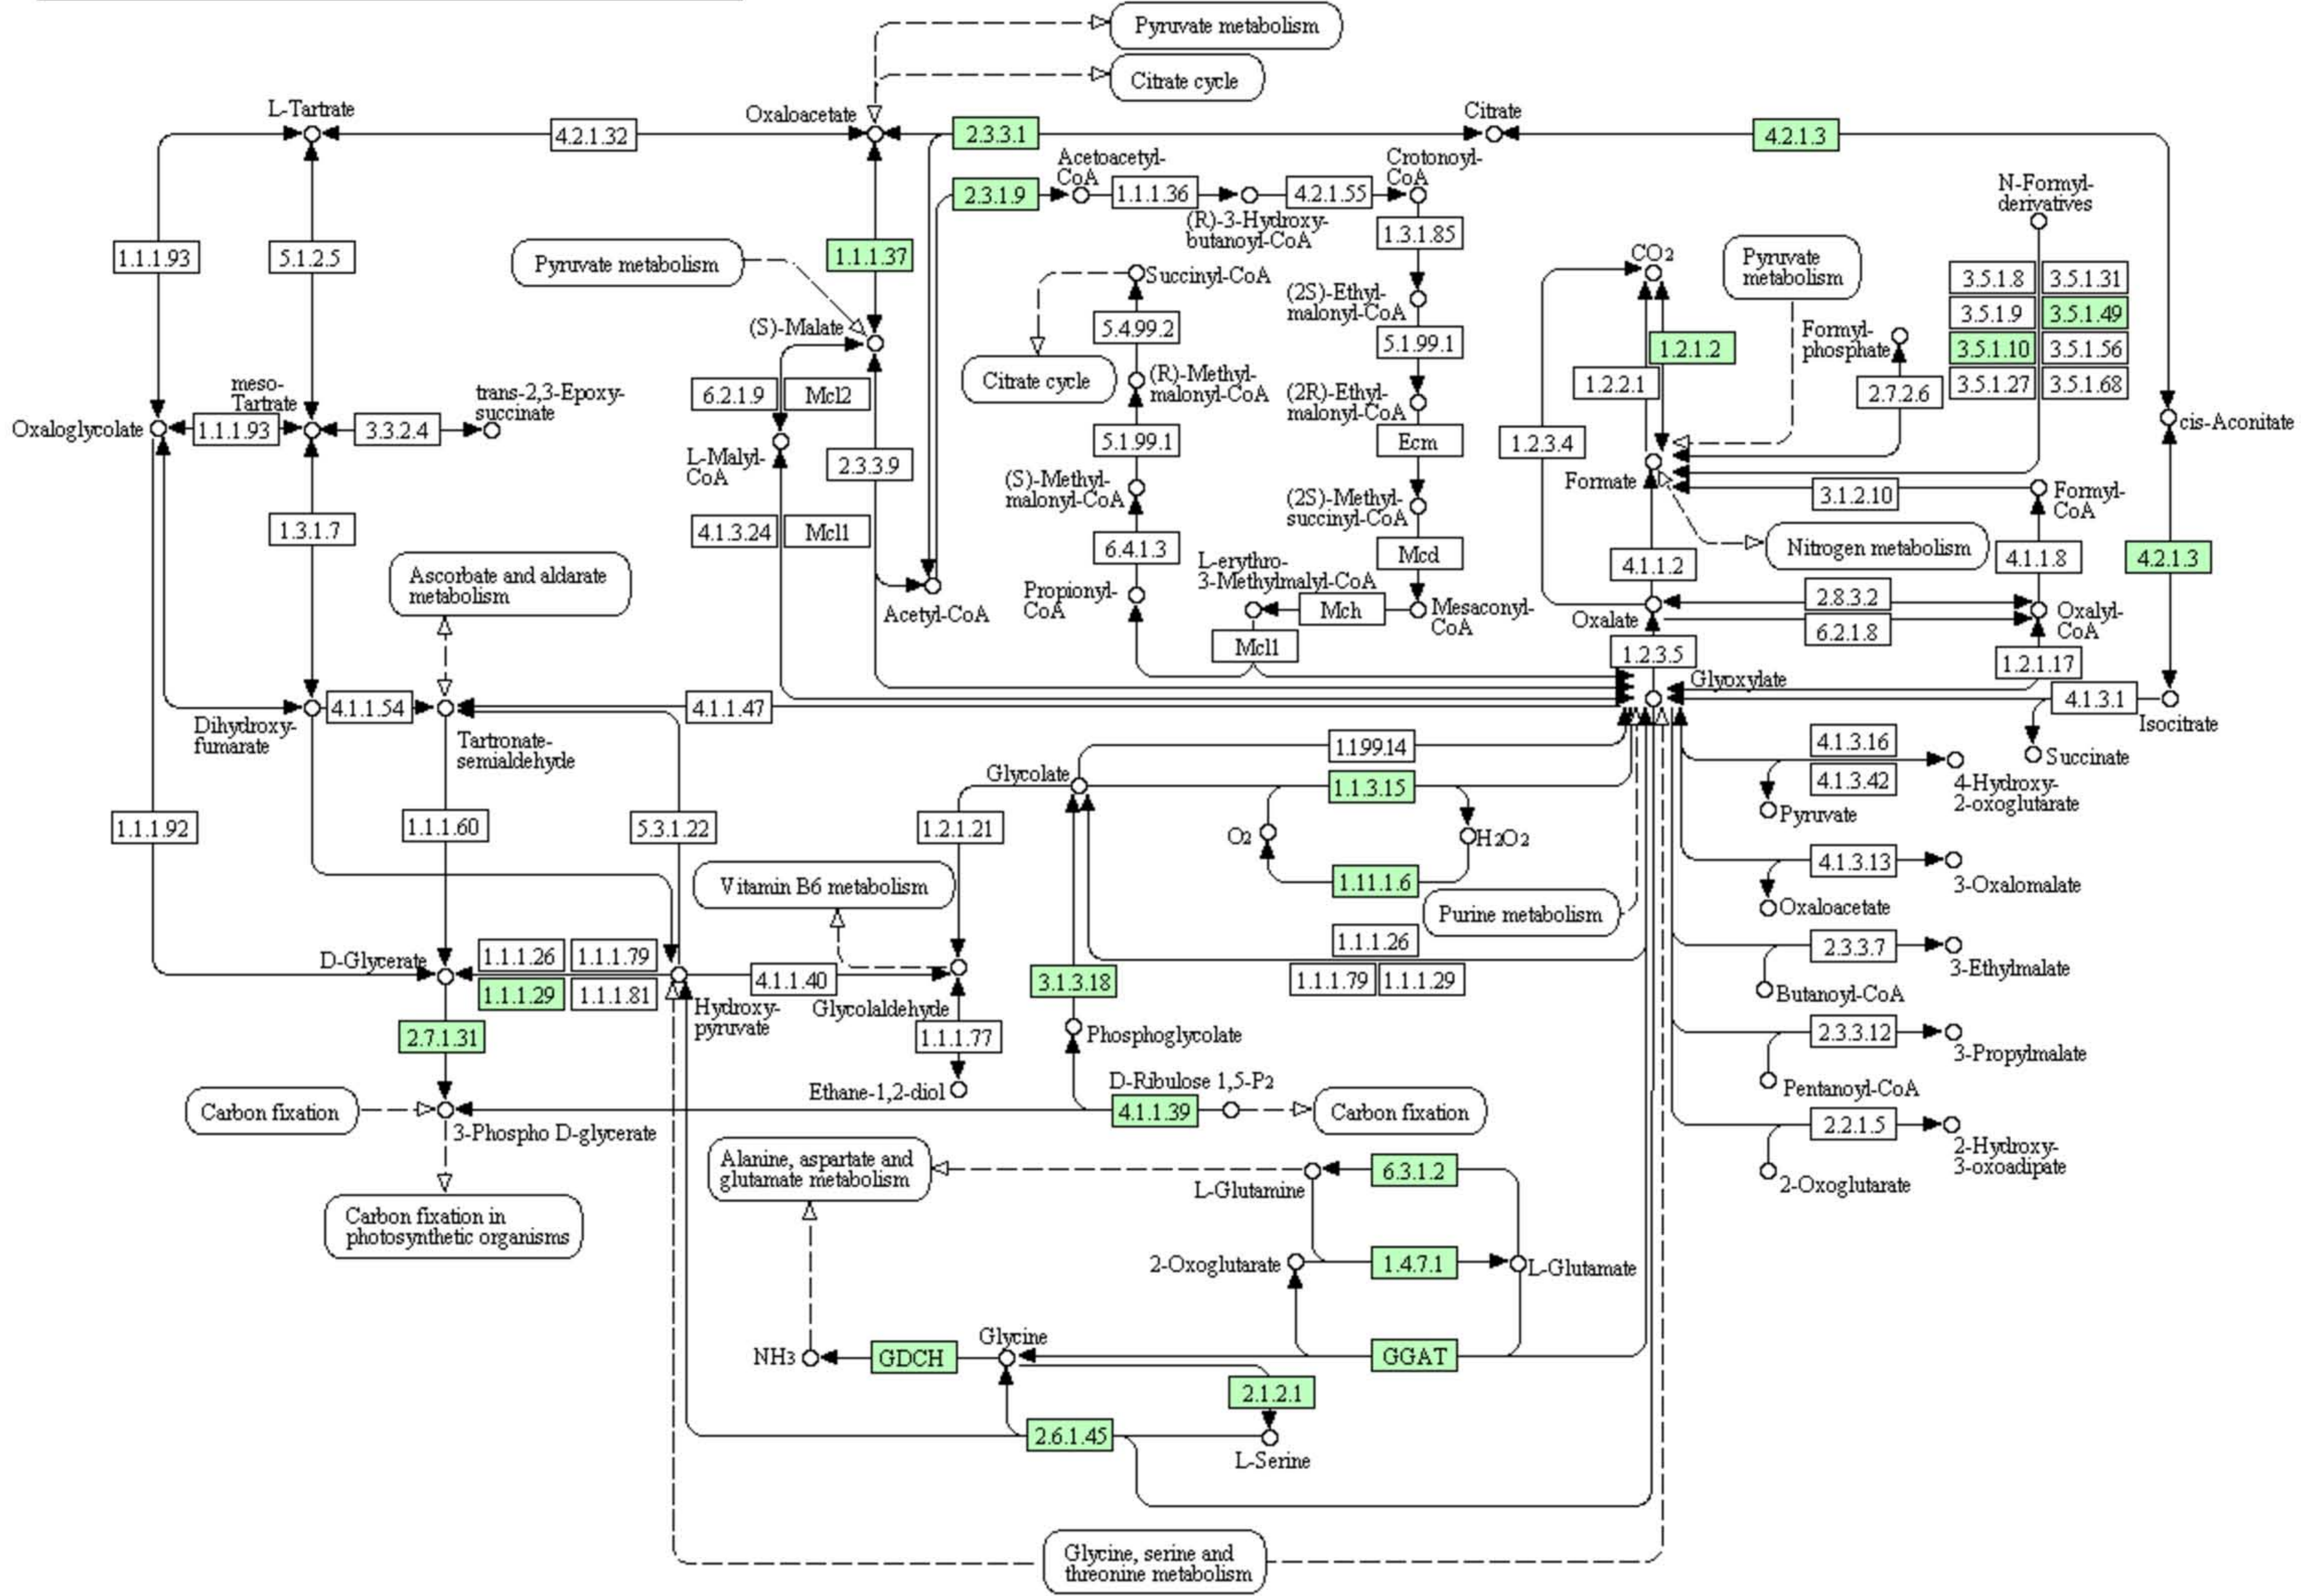



# HIF-1 SIGNALING PATHWAY

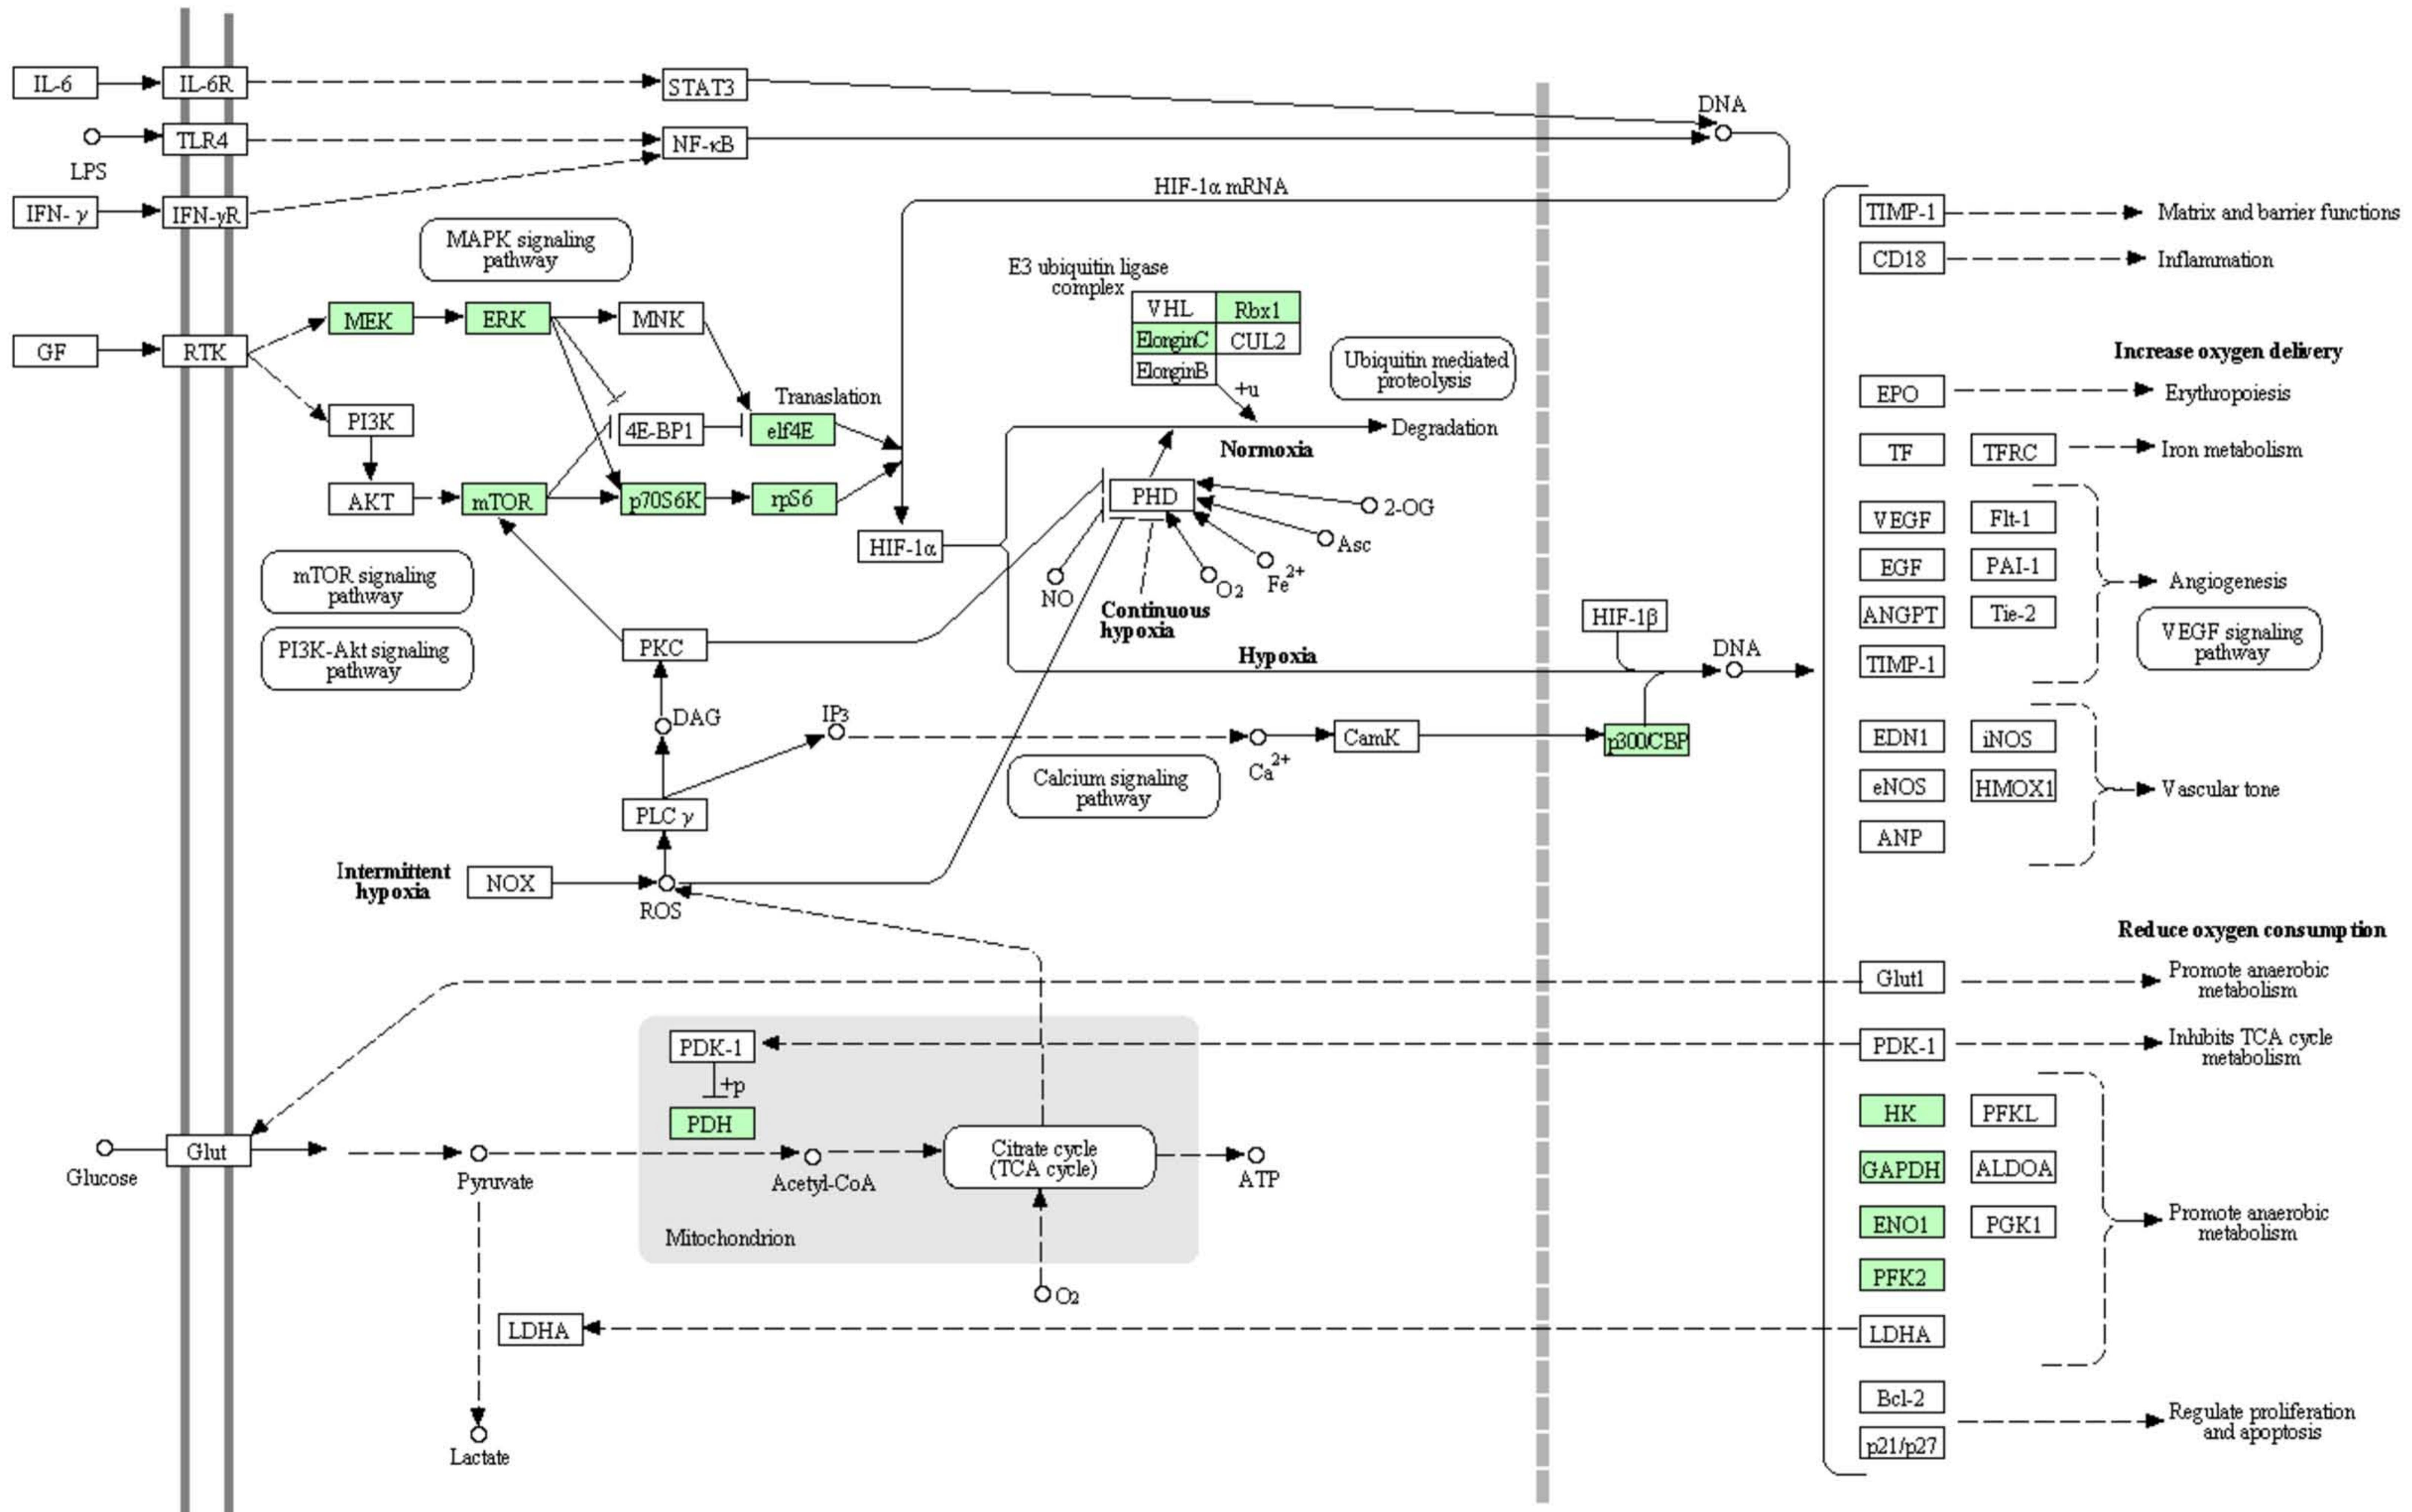







# HOMOLOGOUS RECOMBINATION

## Prokaryotic type

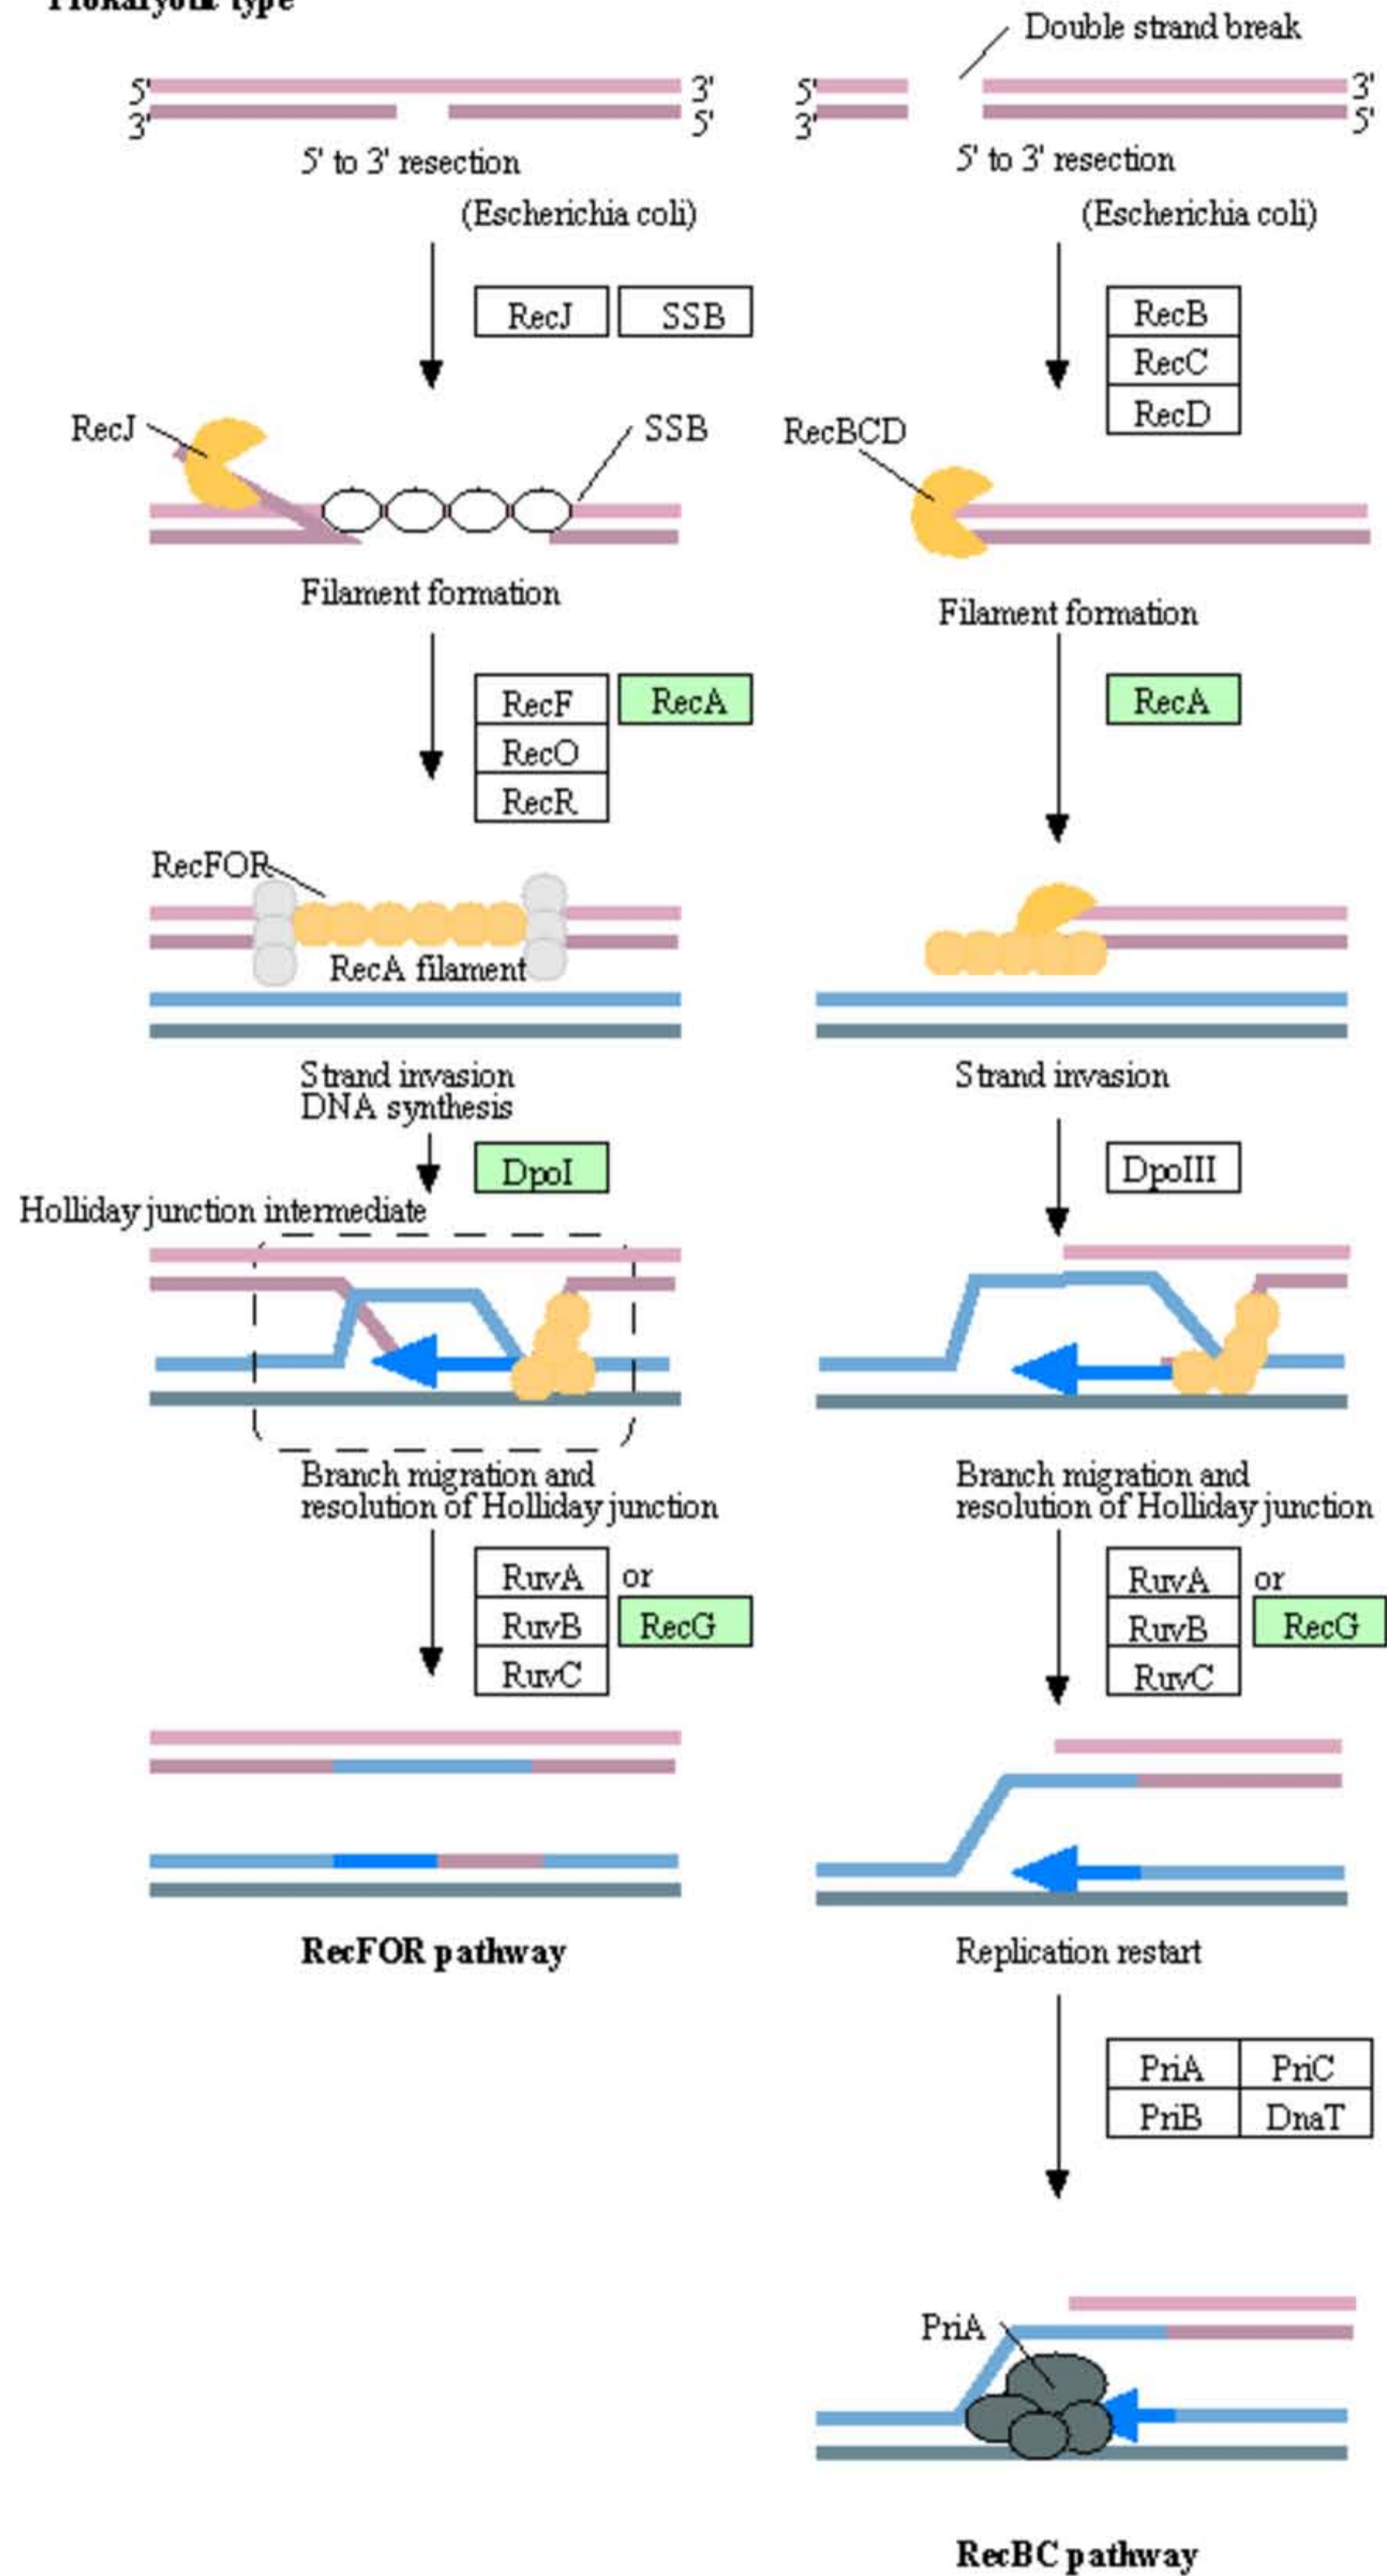

## Eukaryotic type

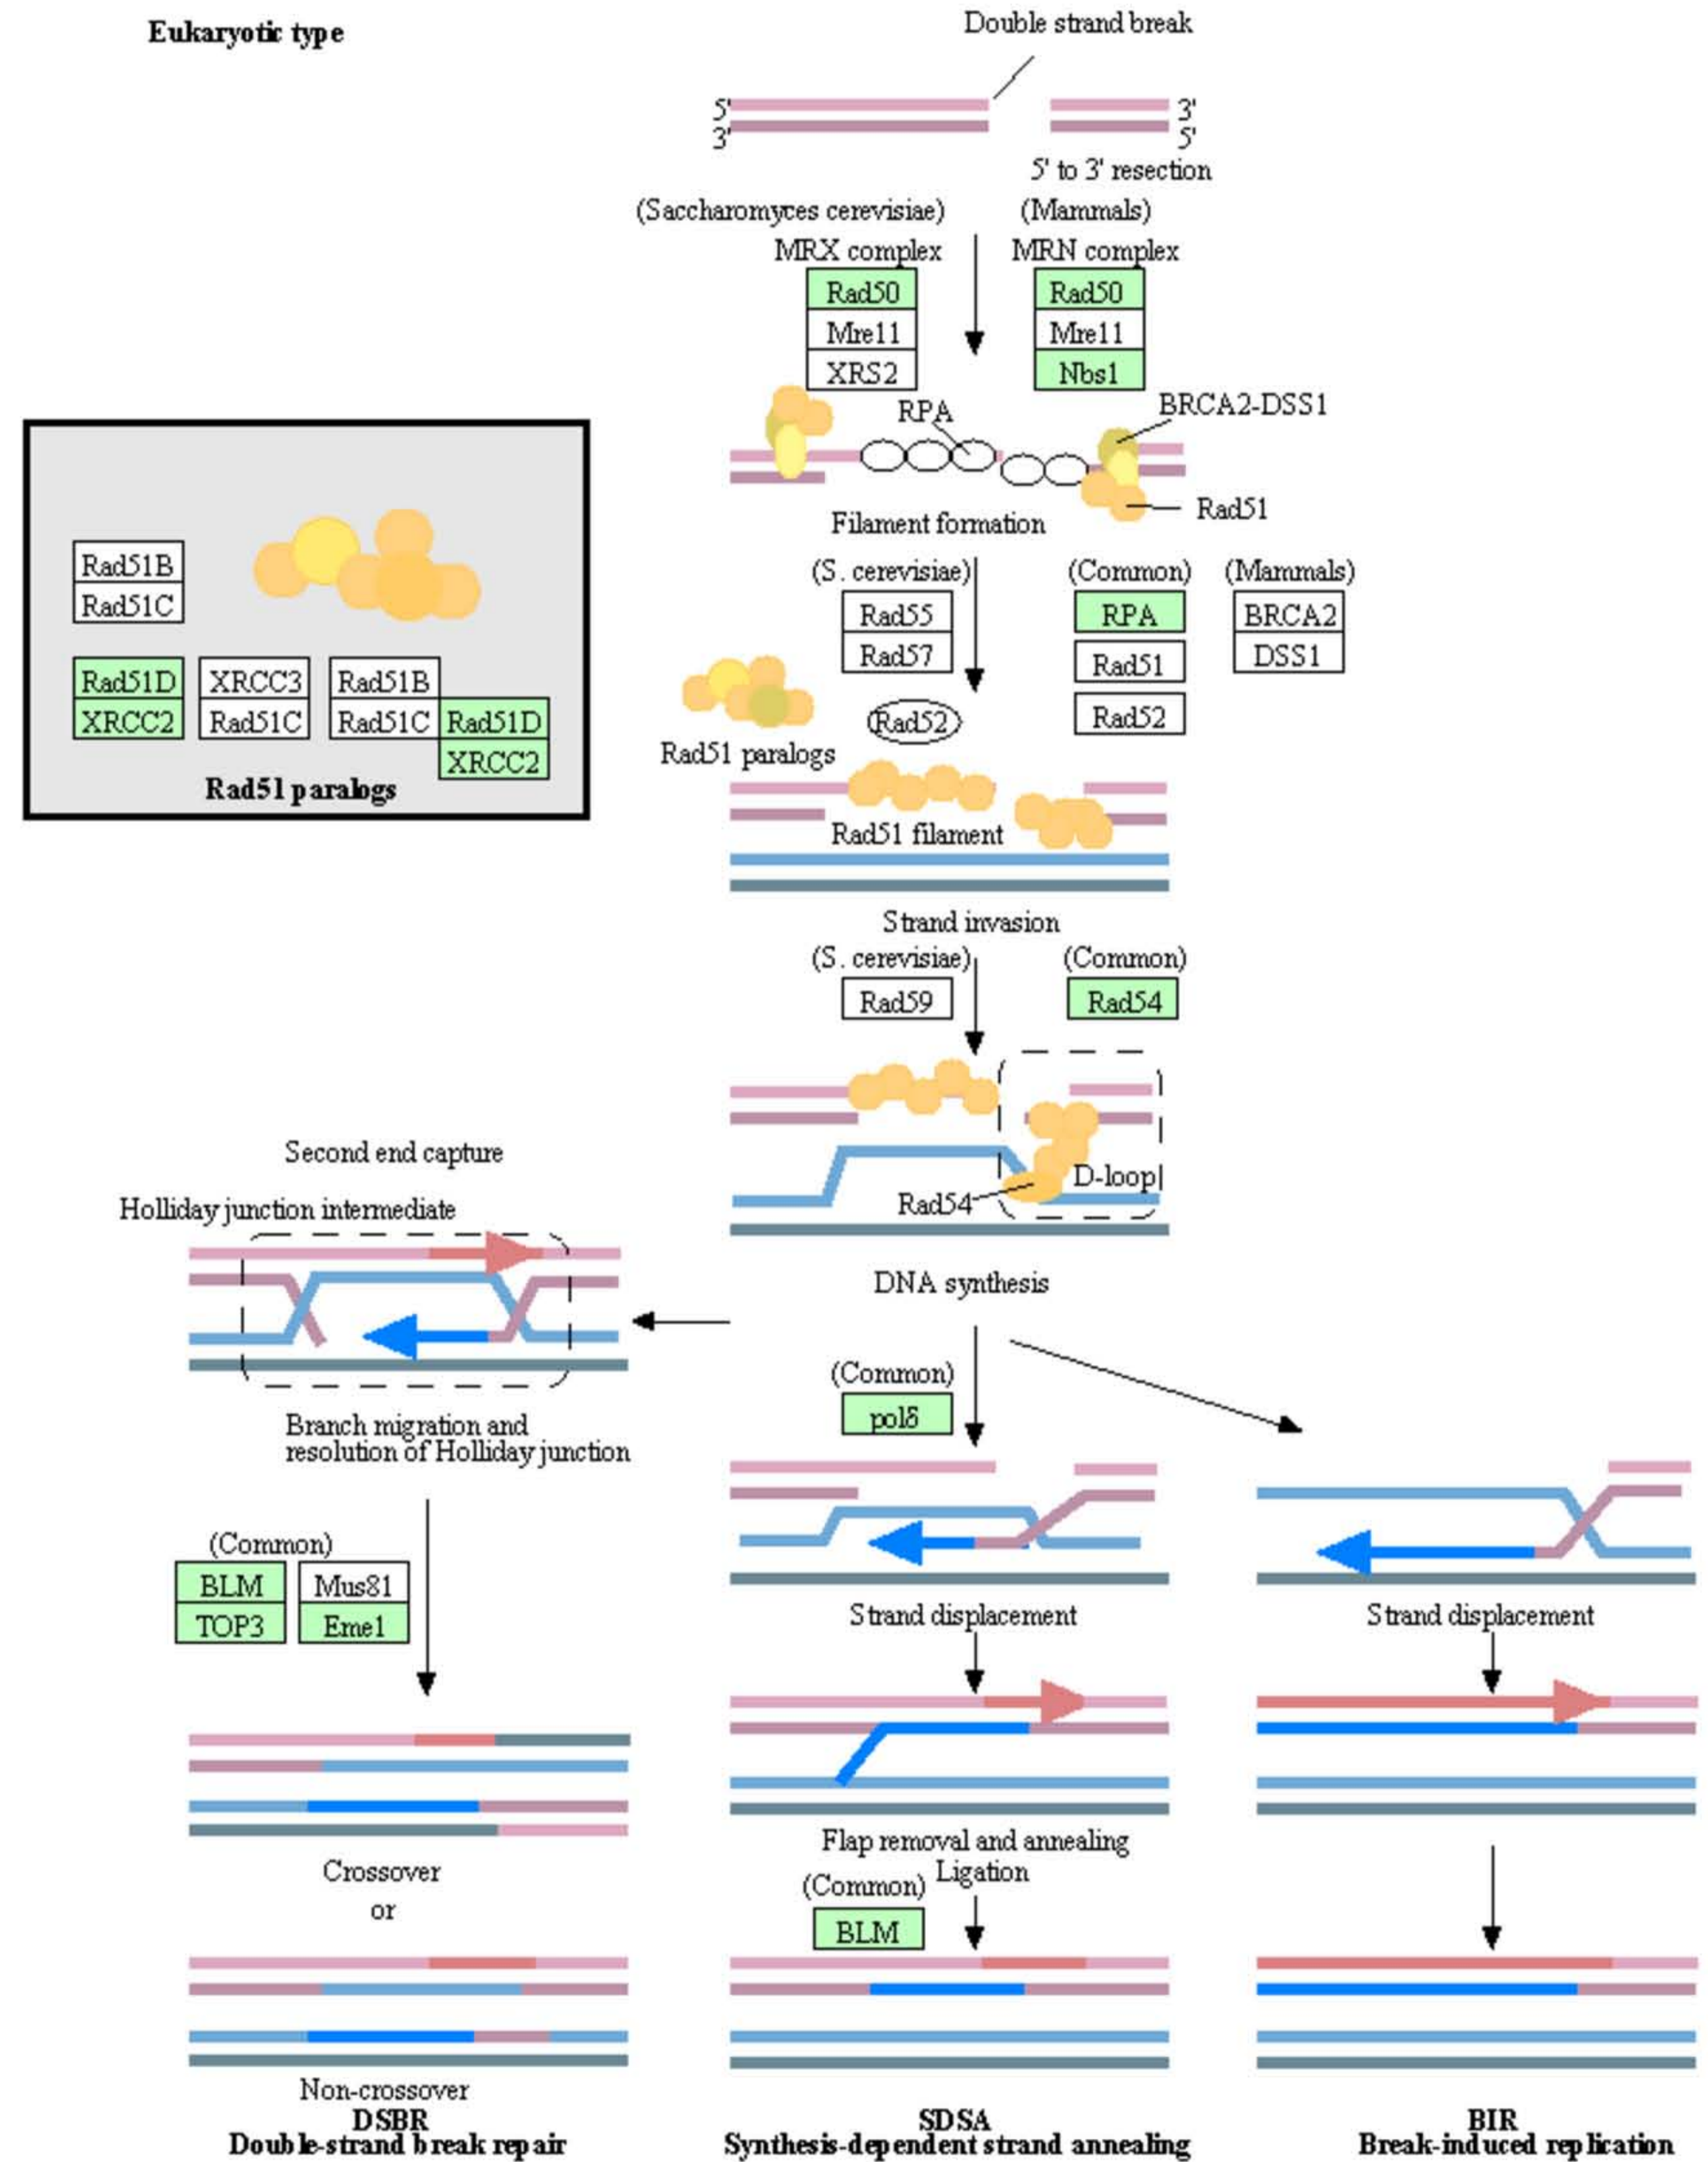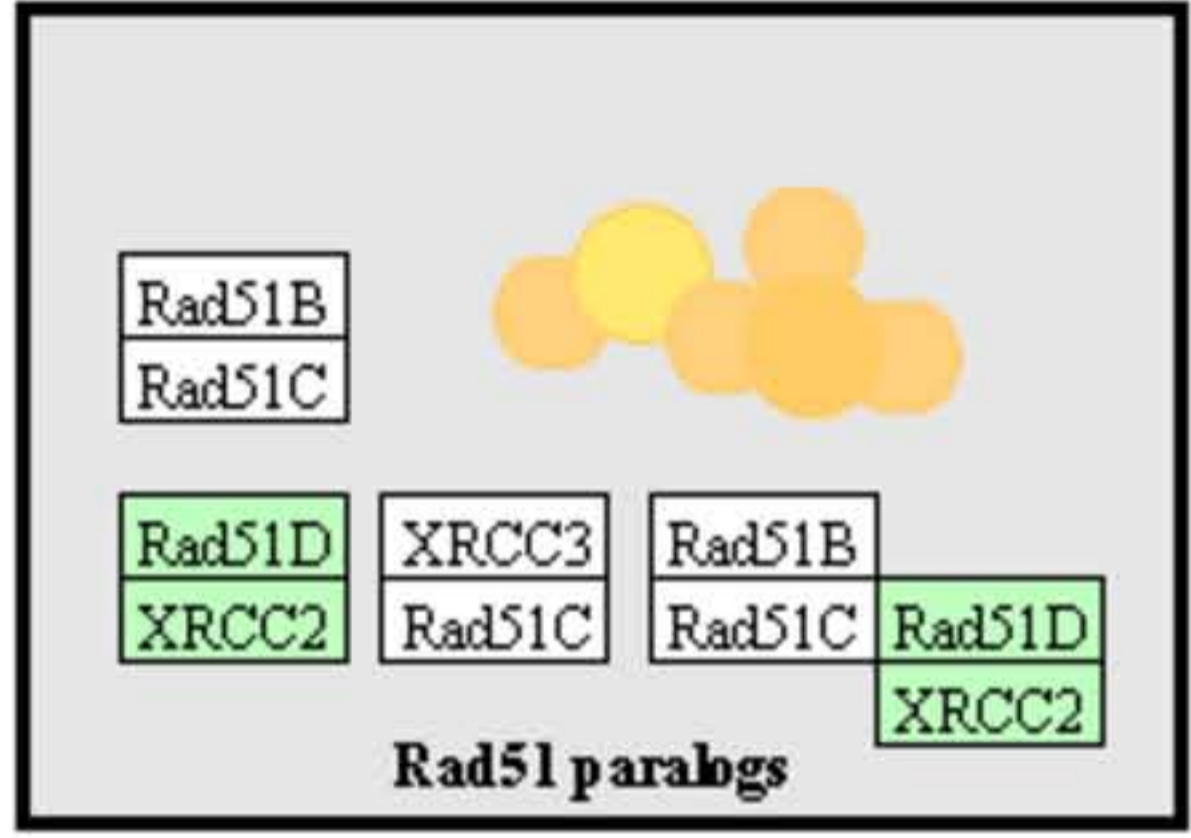



# INOSITOL PHOSPHATE METABOLISM

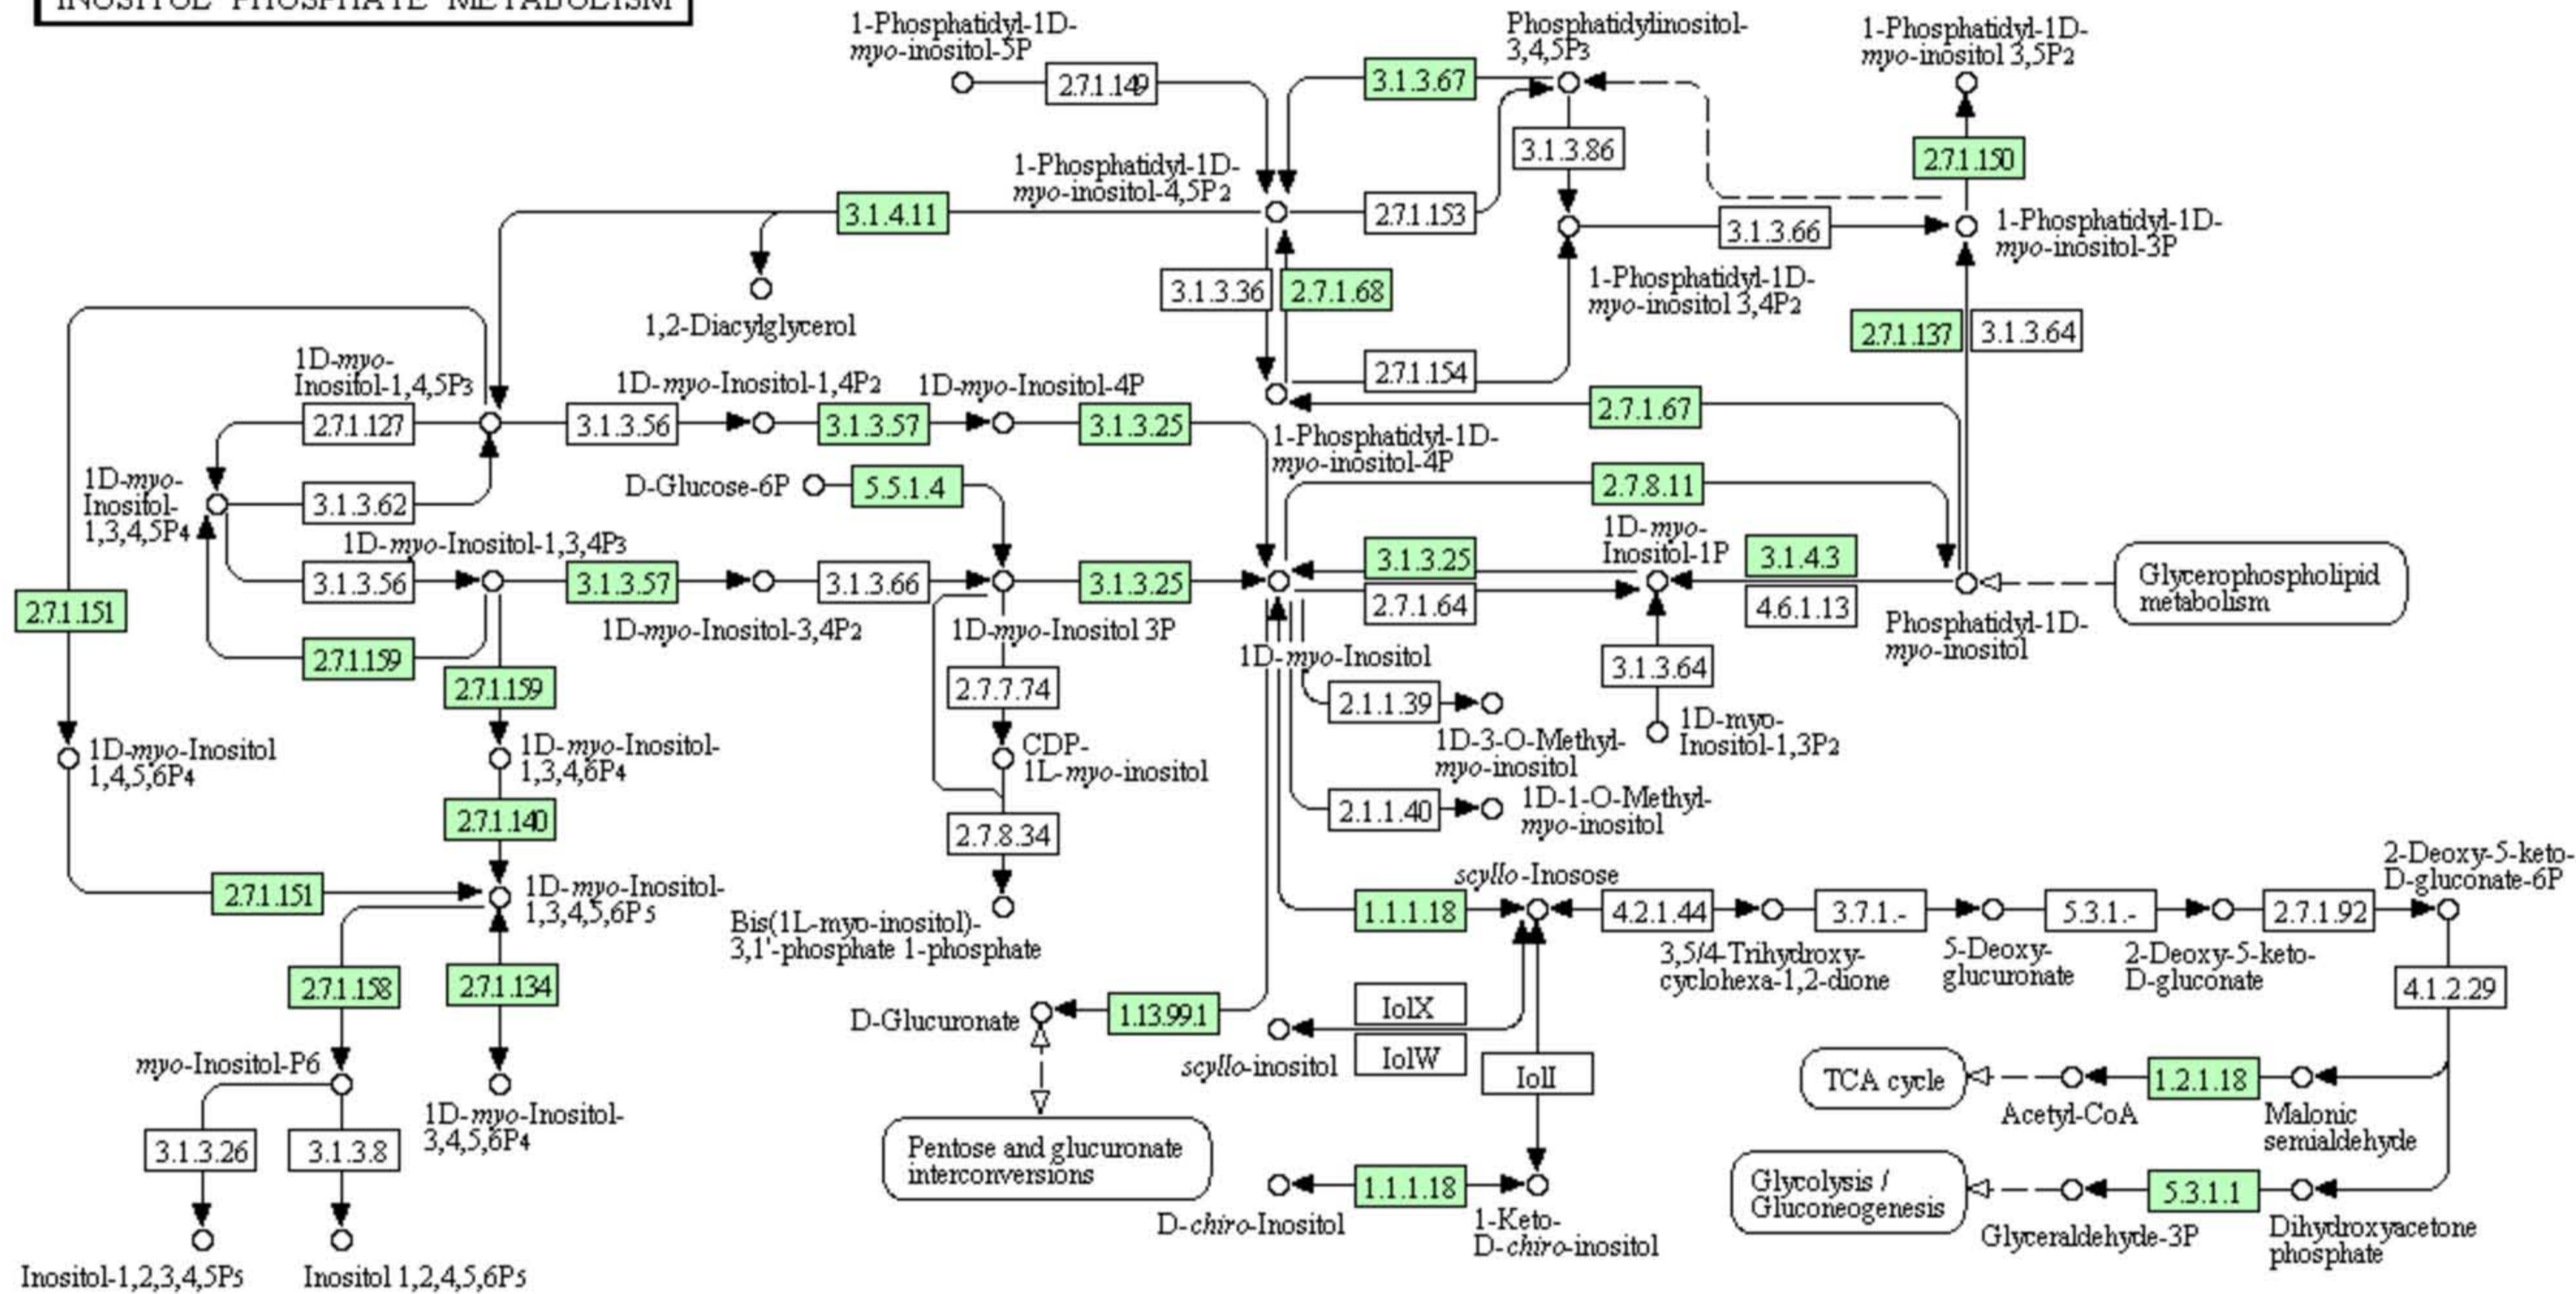



ISOQUINOLINE ALKALOID BIOSYNTHESIS

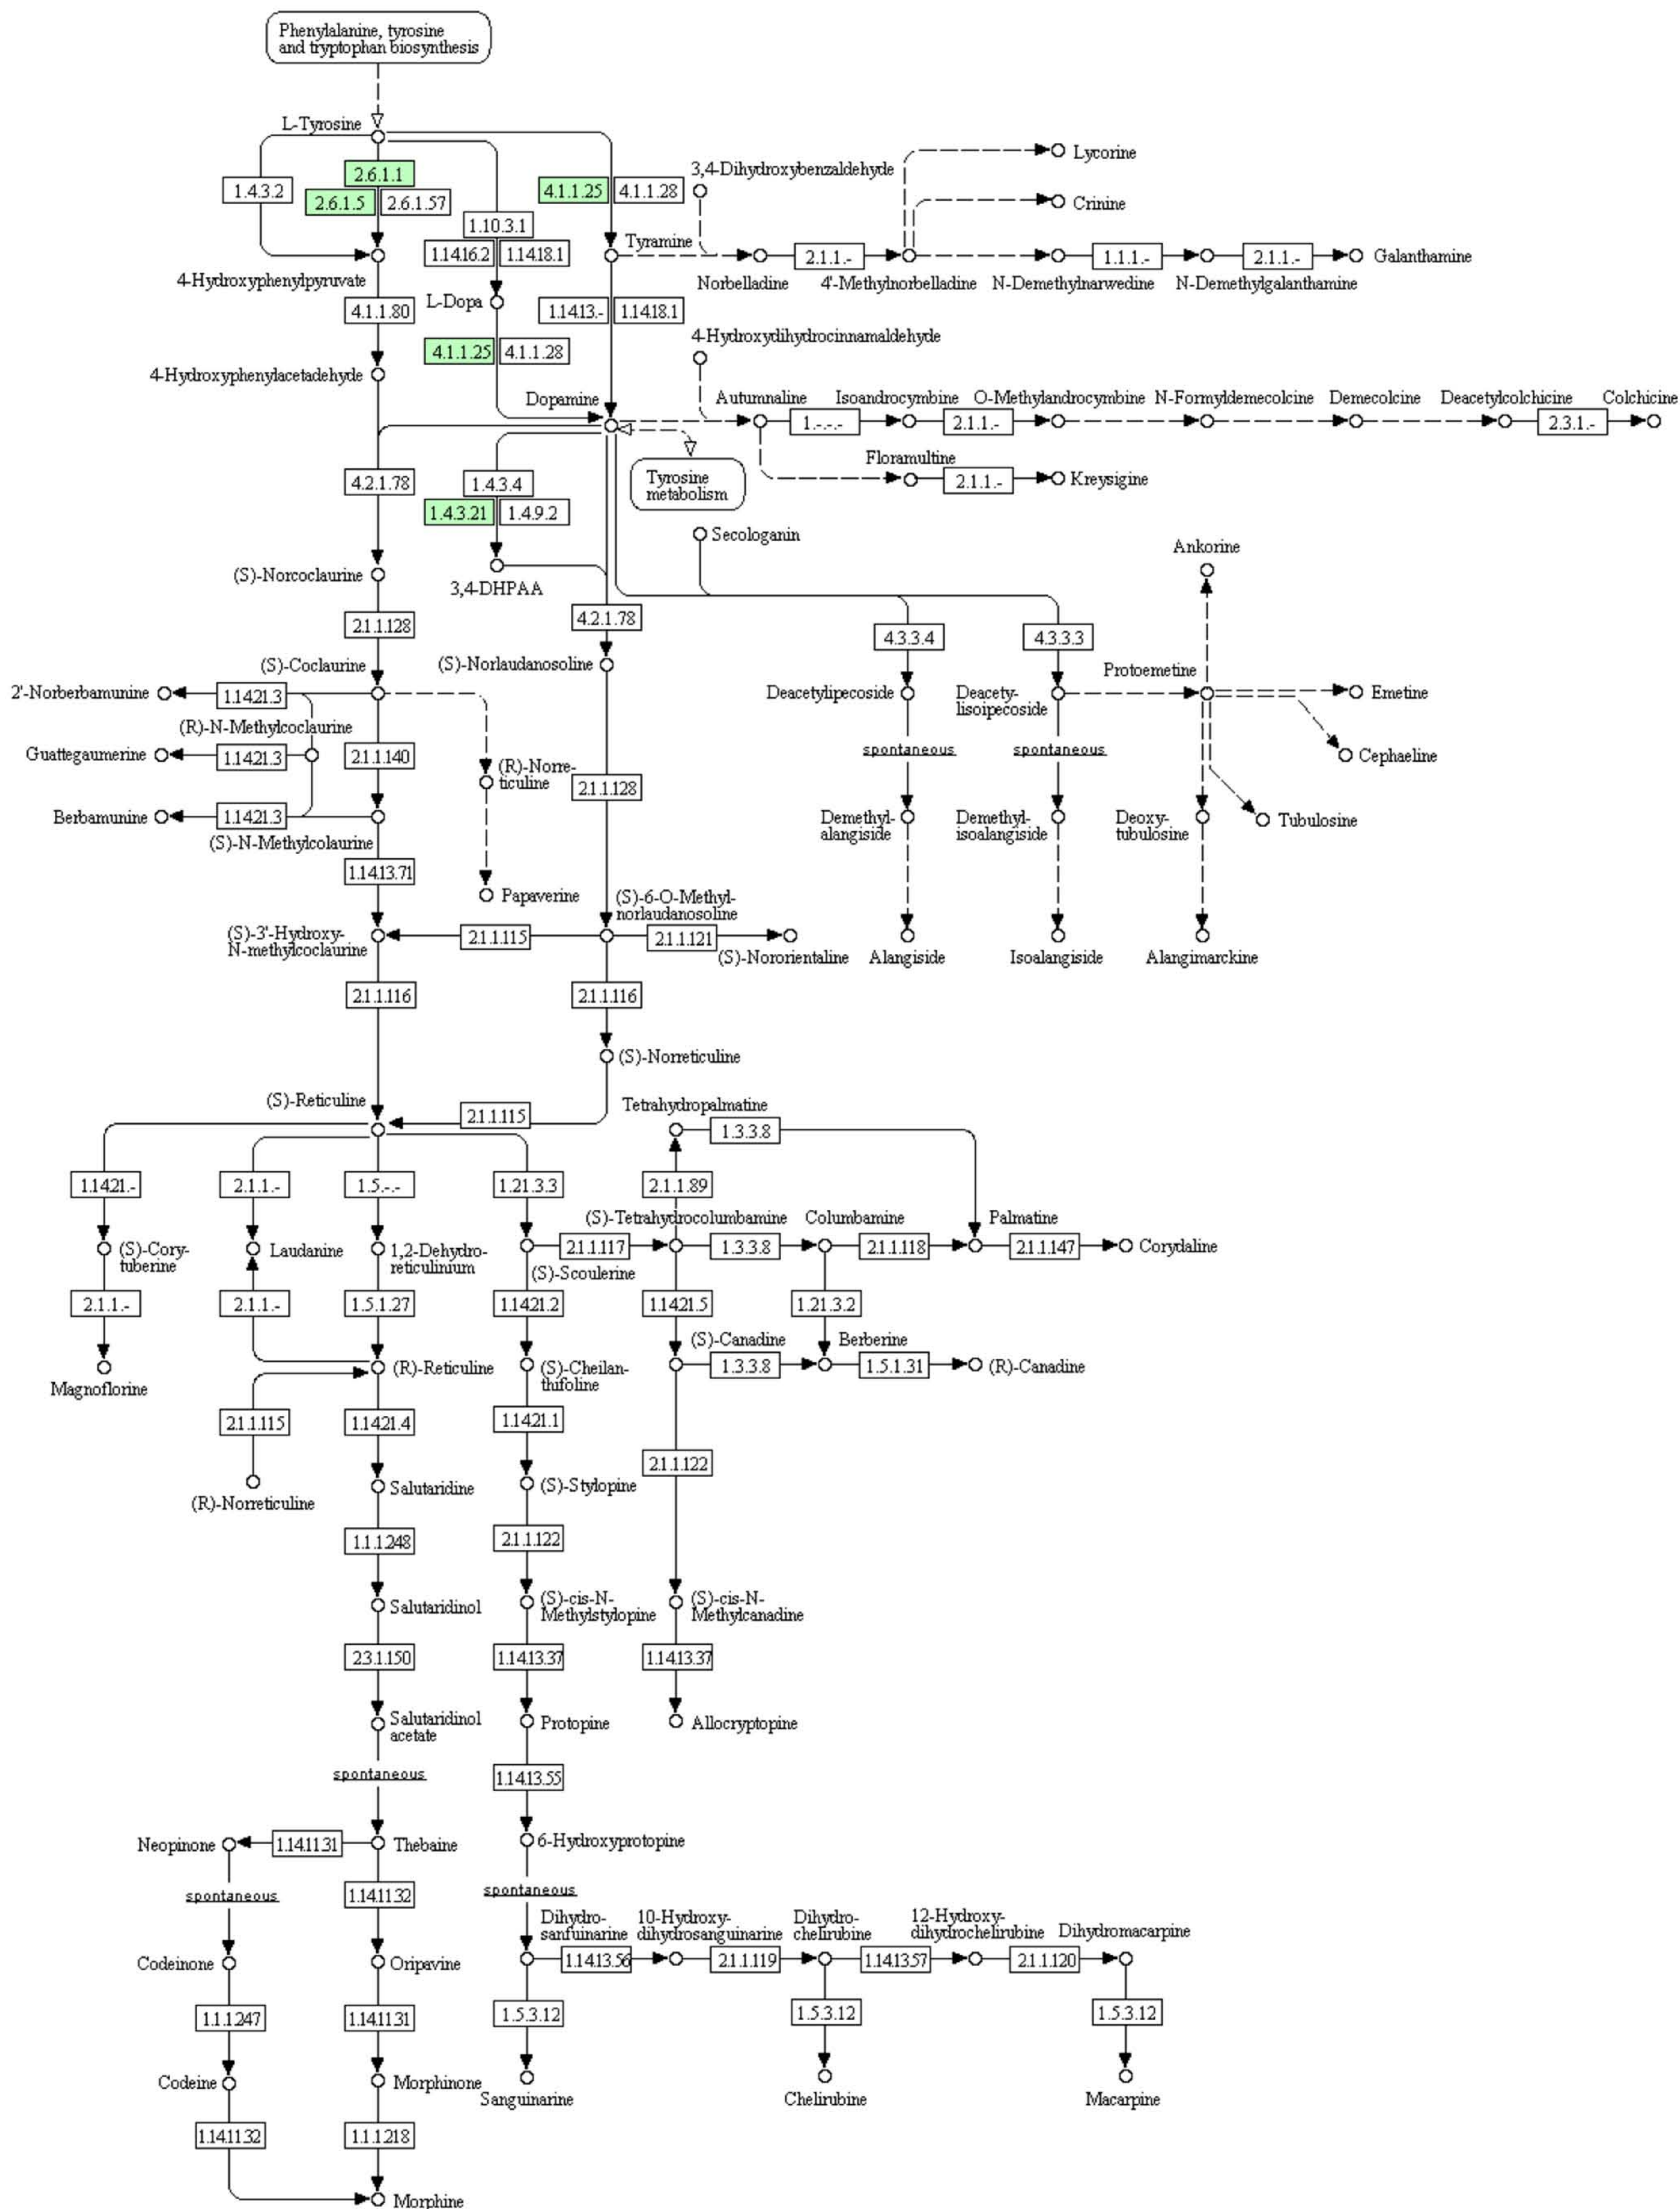



LIMONENE AND PINENE DEGRADATION

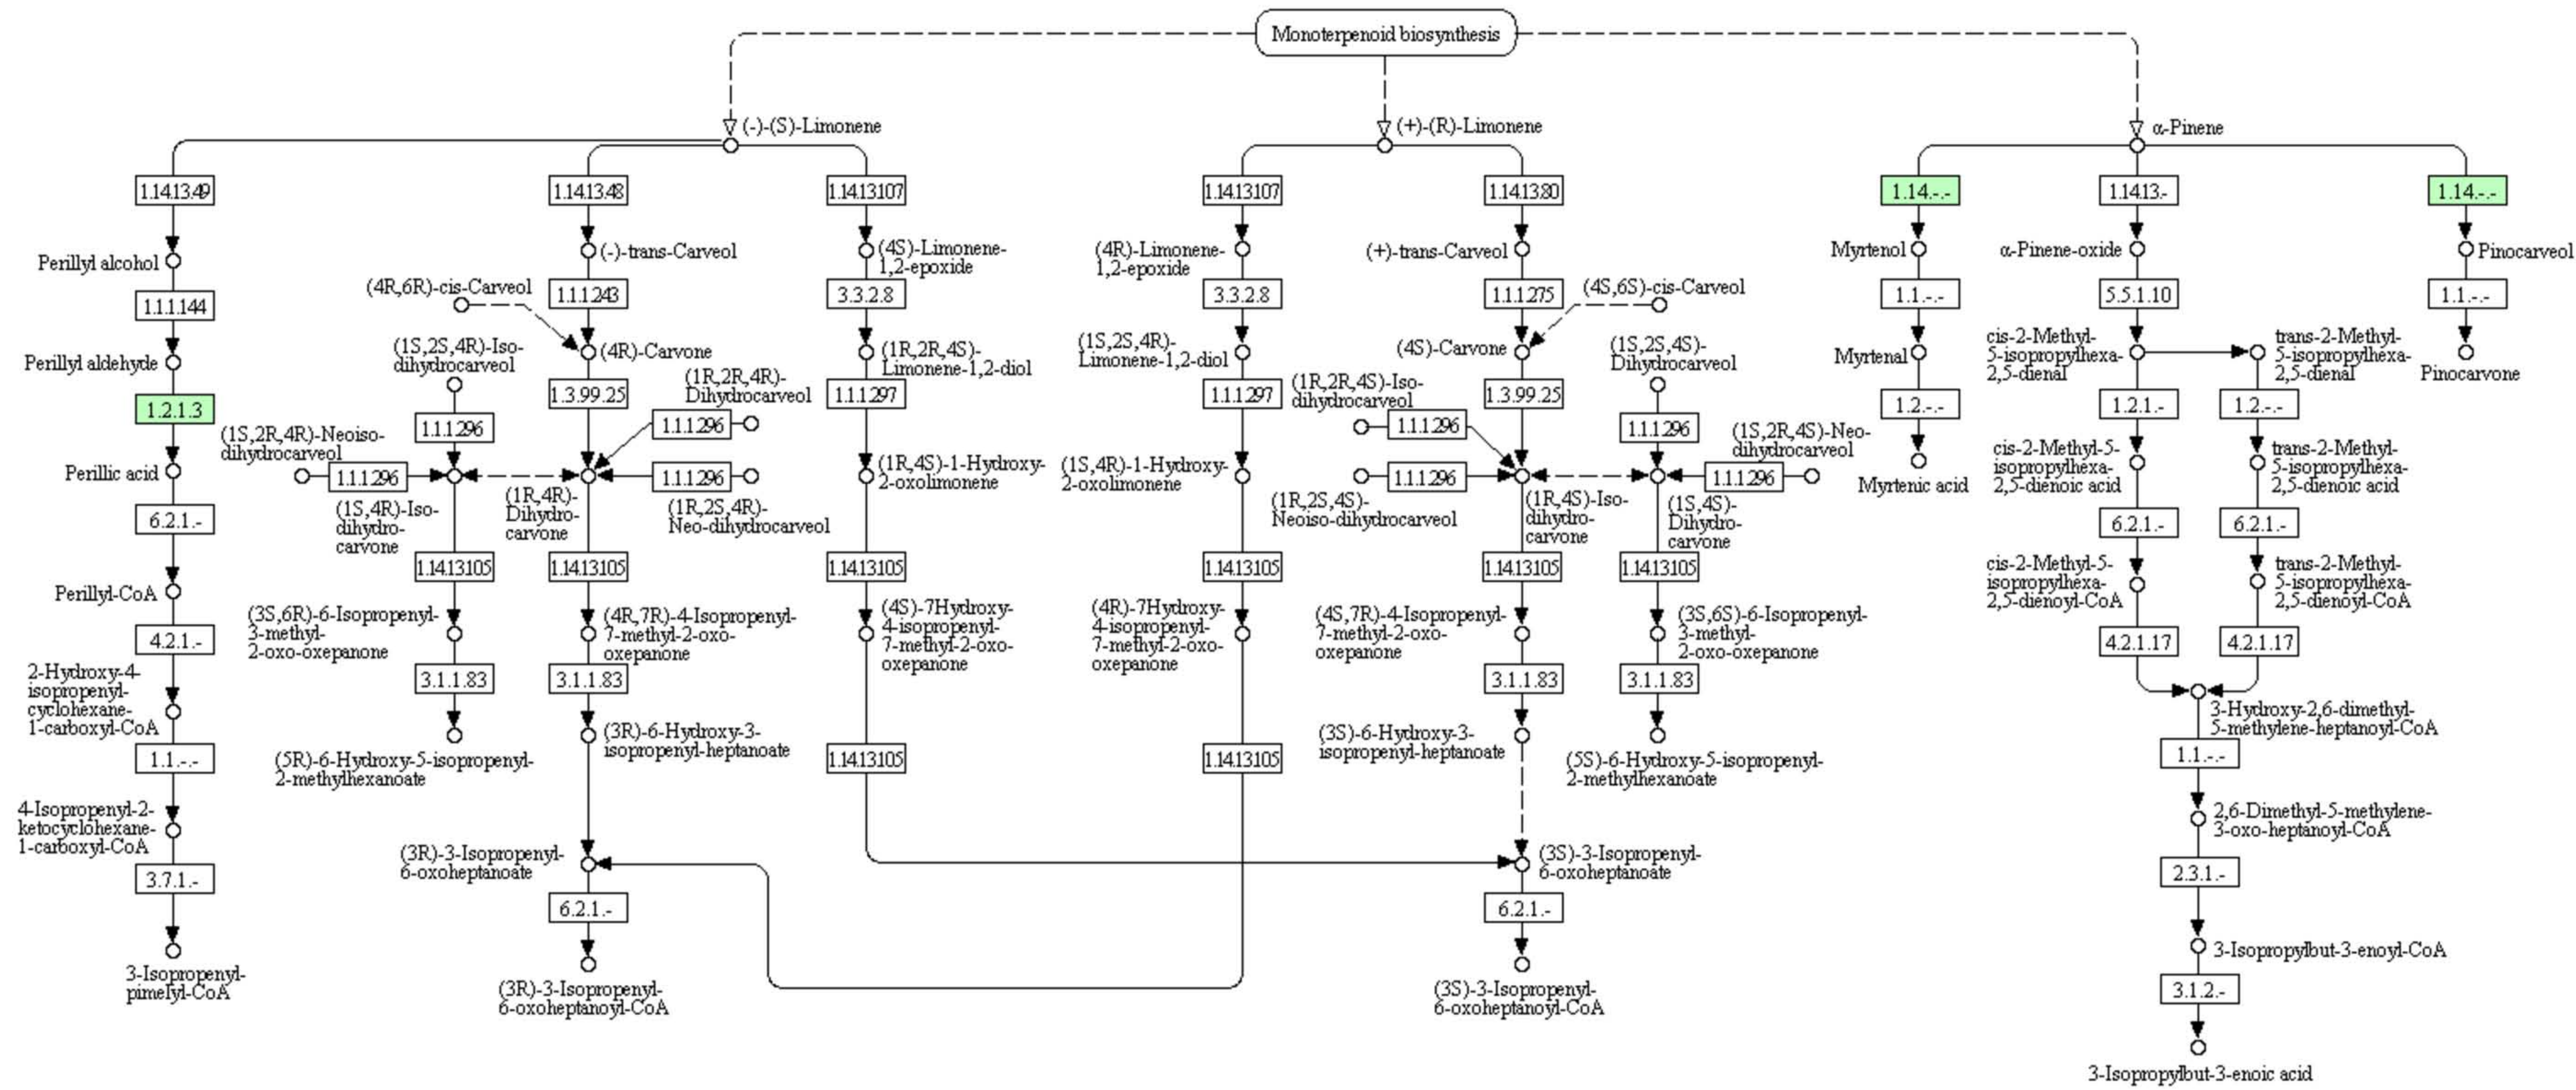



# LINOLEIC ACID METABOLISM

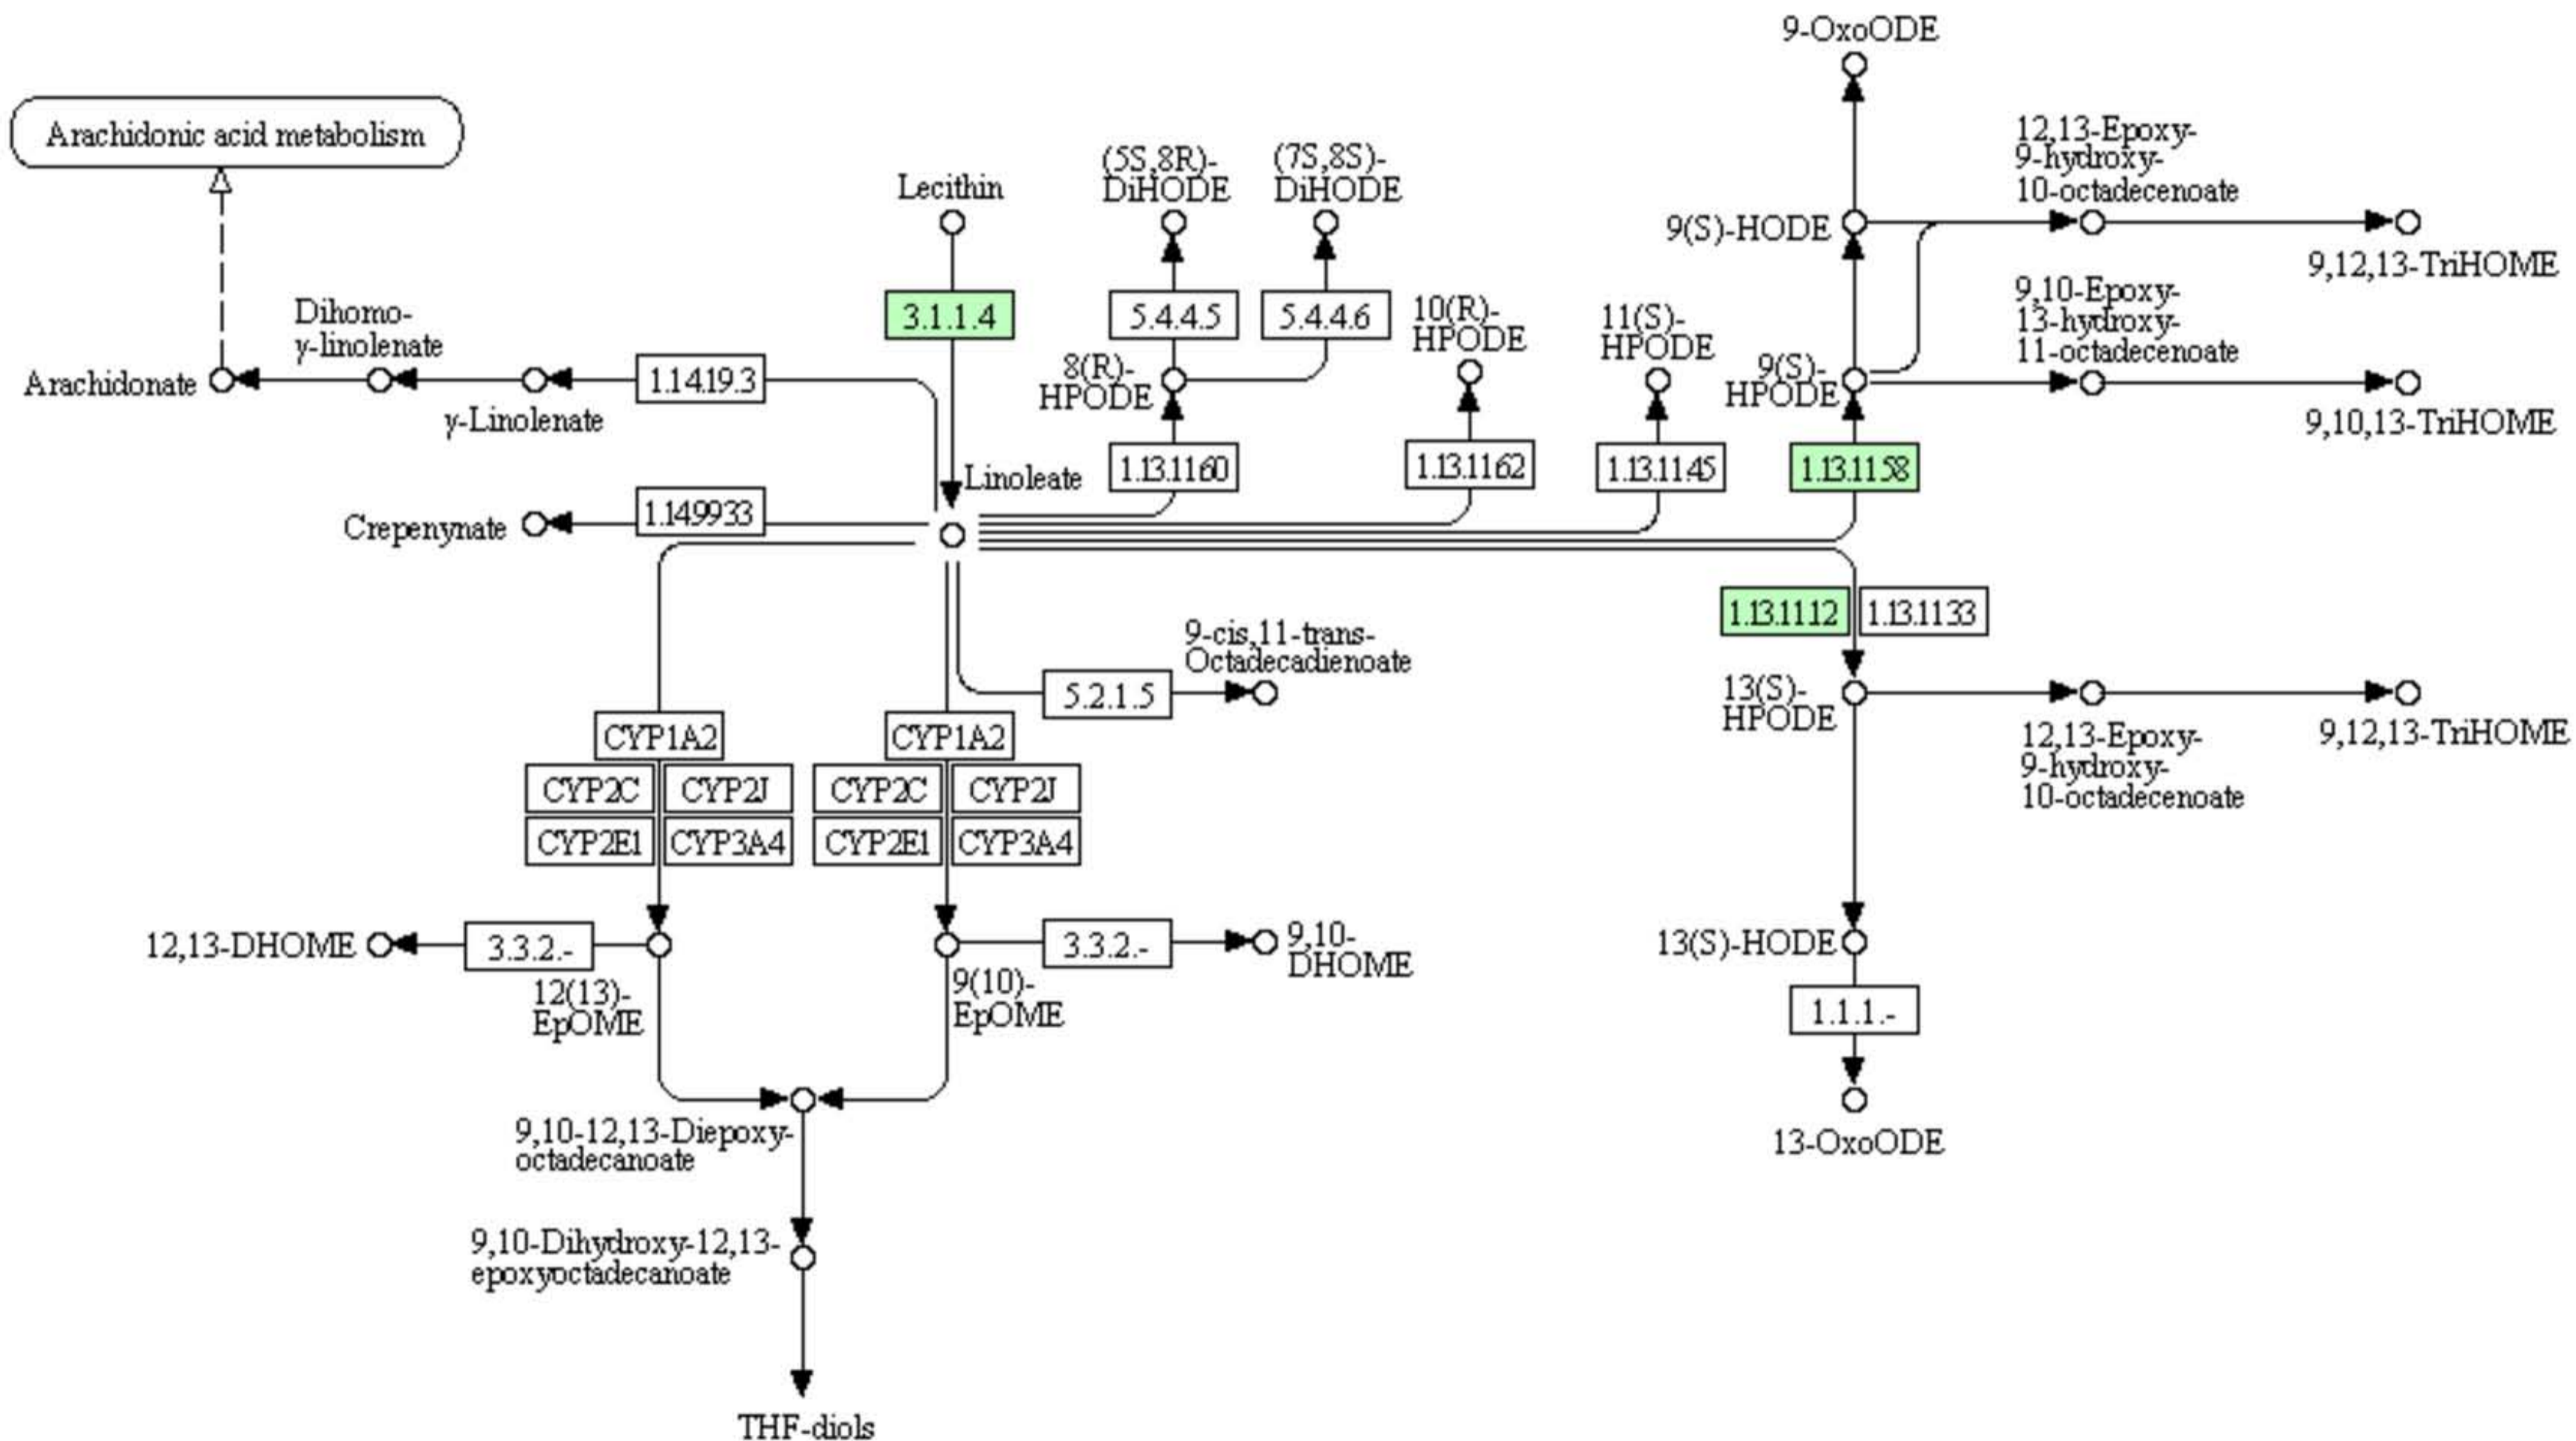



# LIPOIC ACID METABOLISM

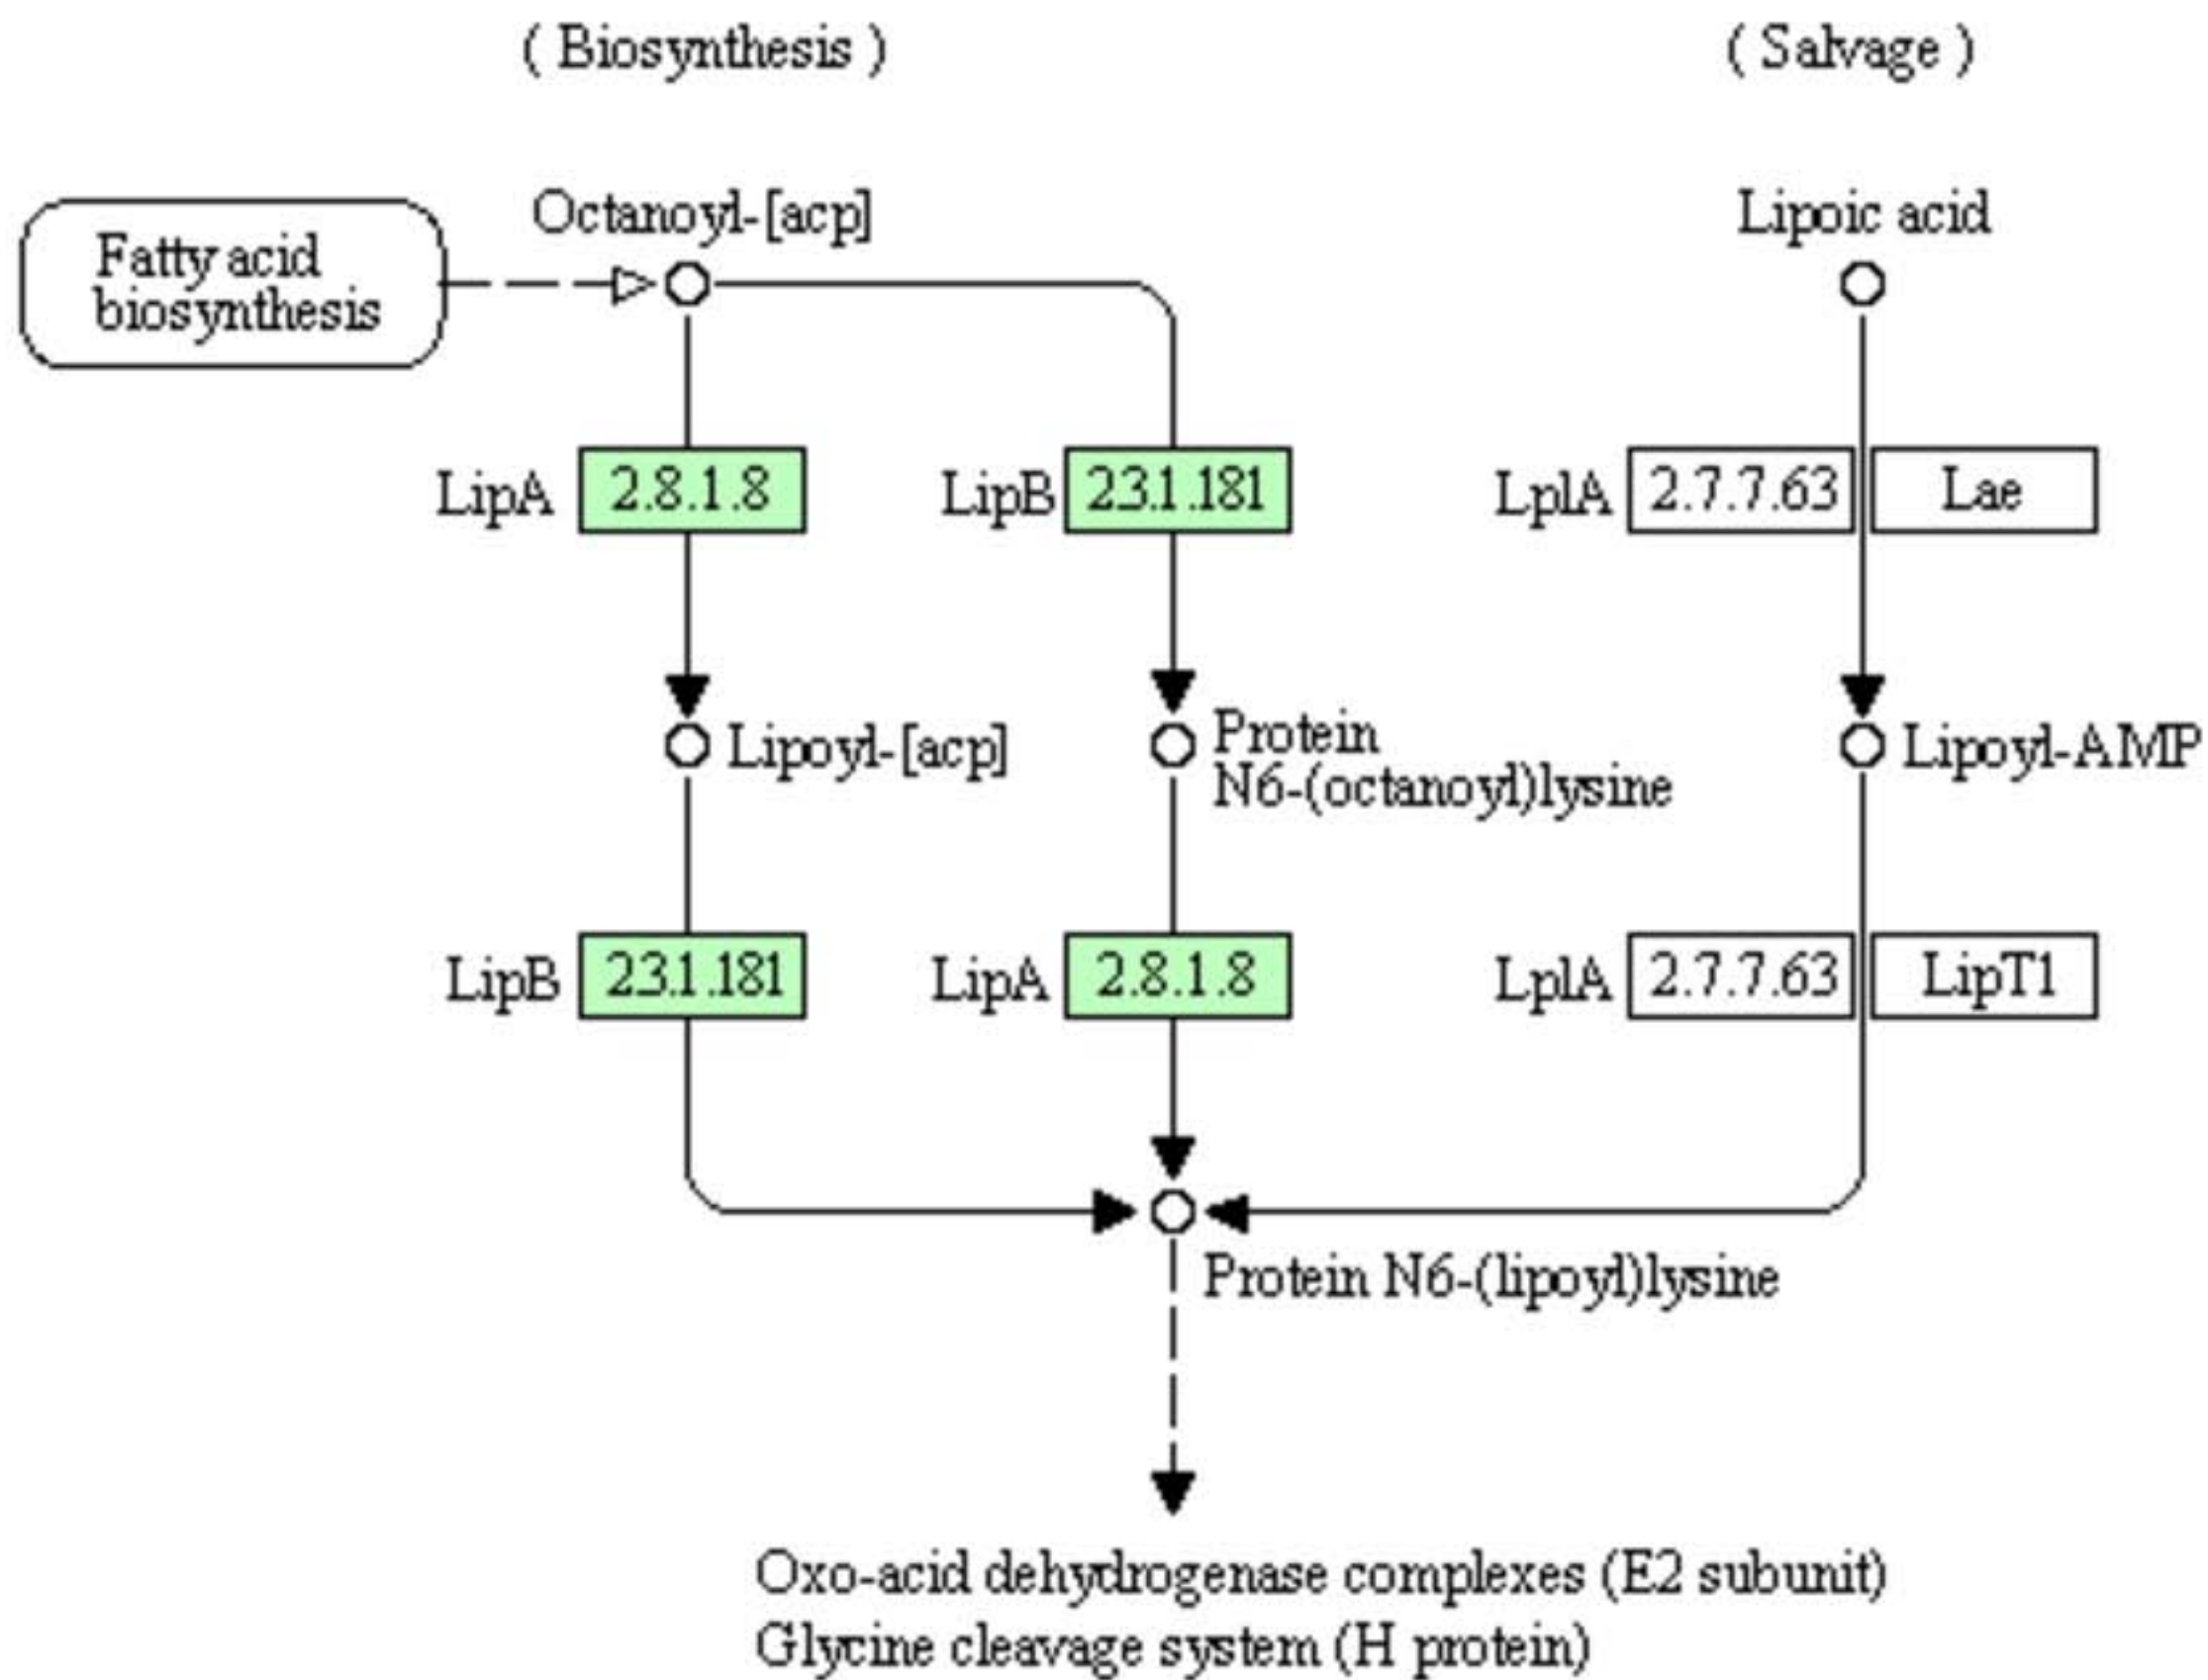



# LIPOPOLYSACCHARIDE BIOSYNTHESIS

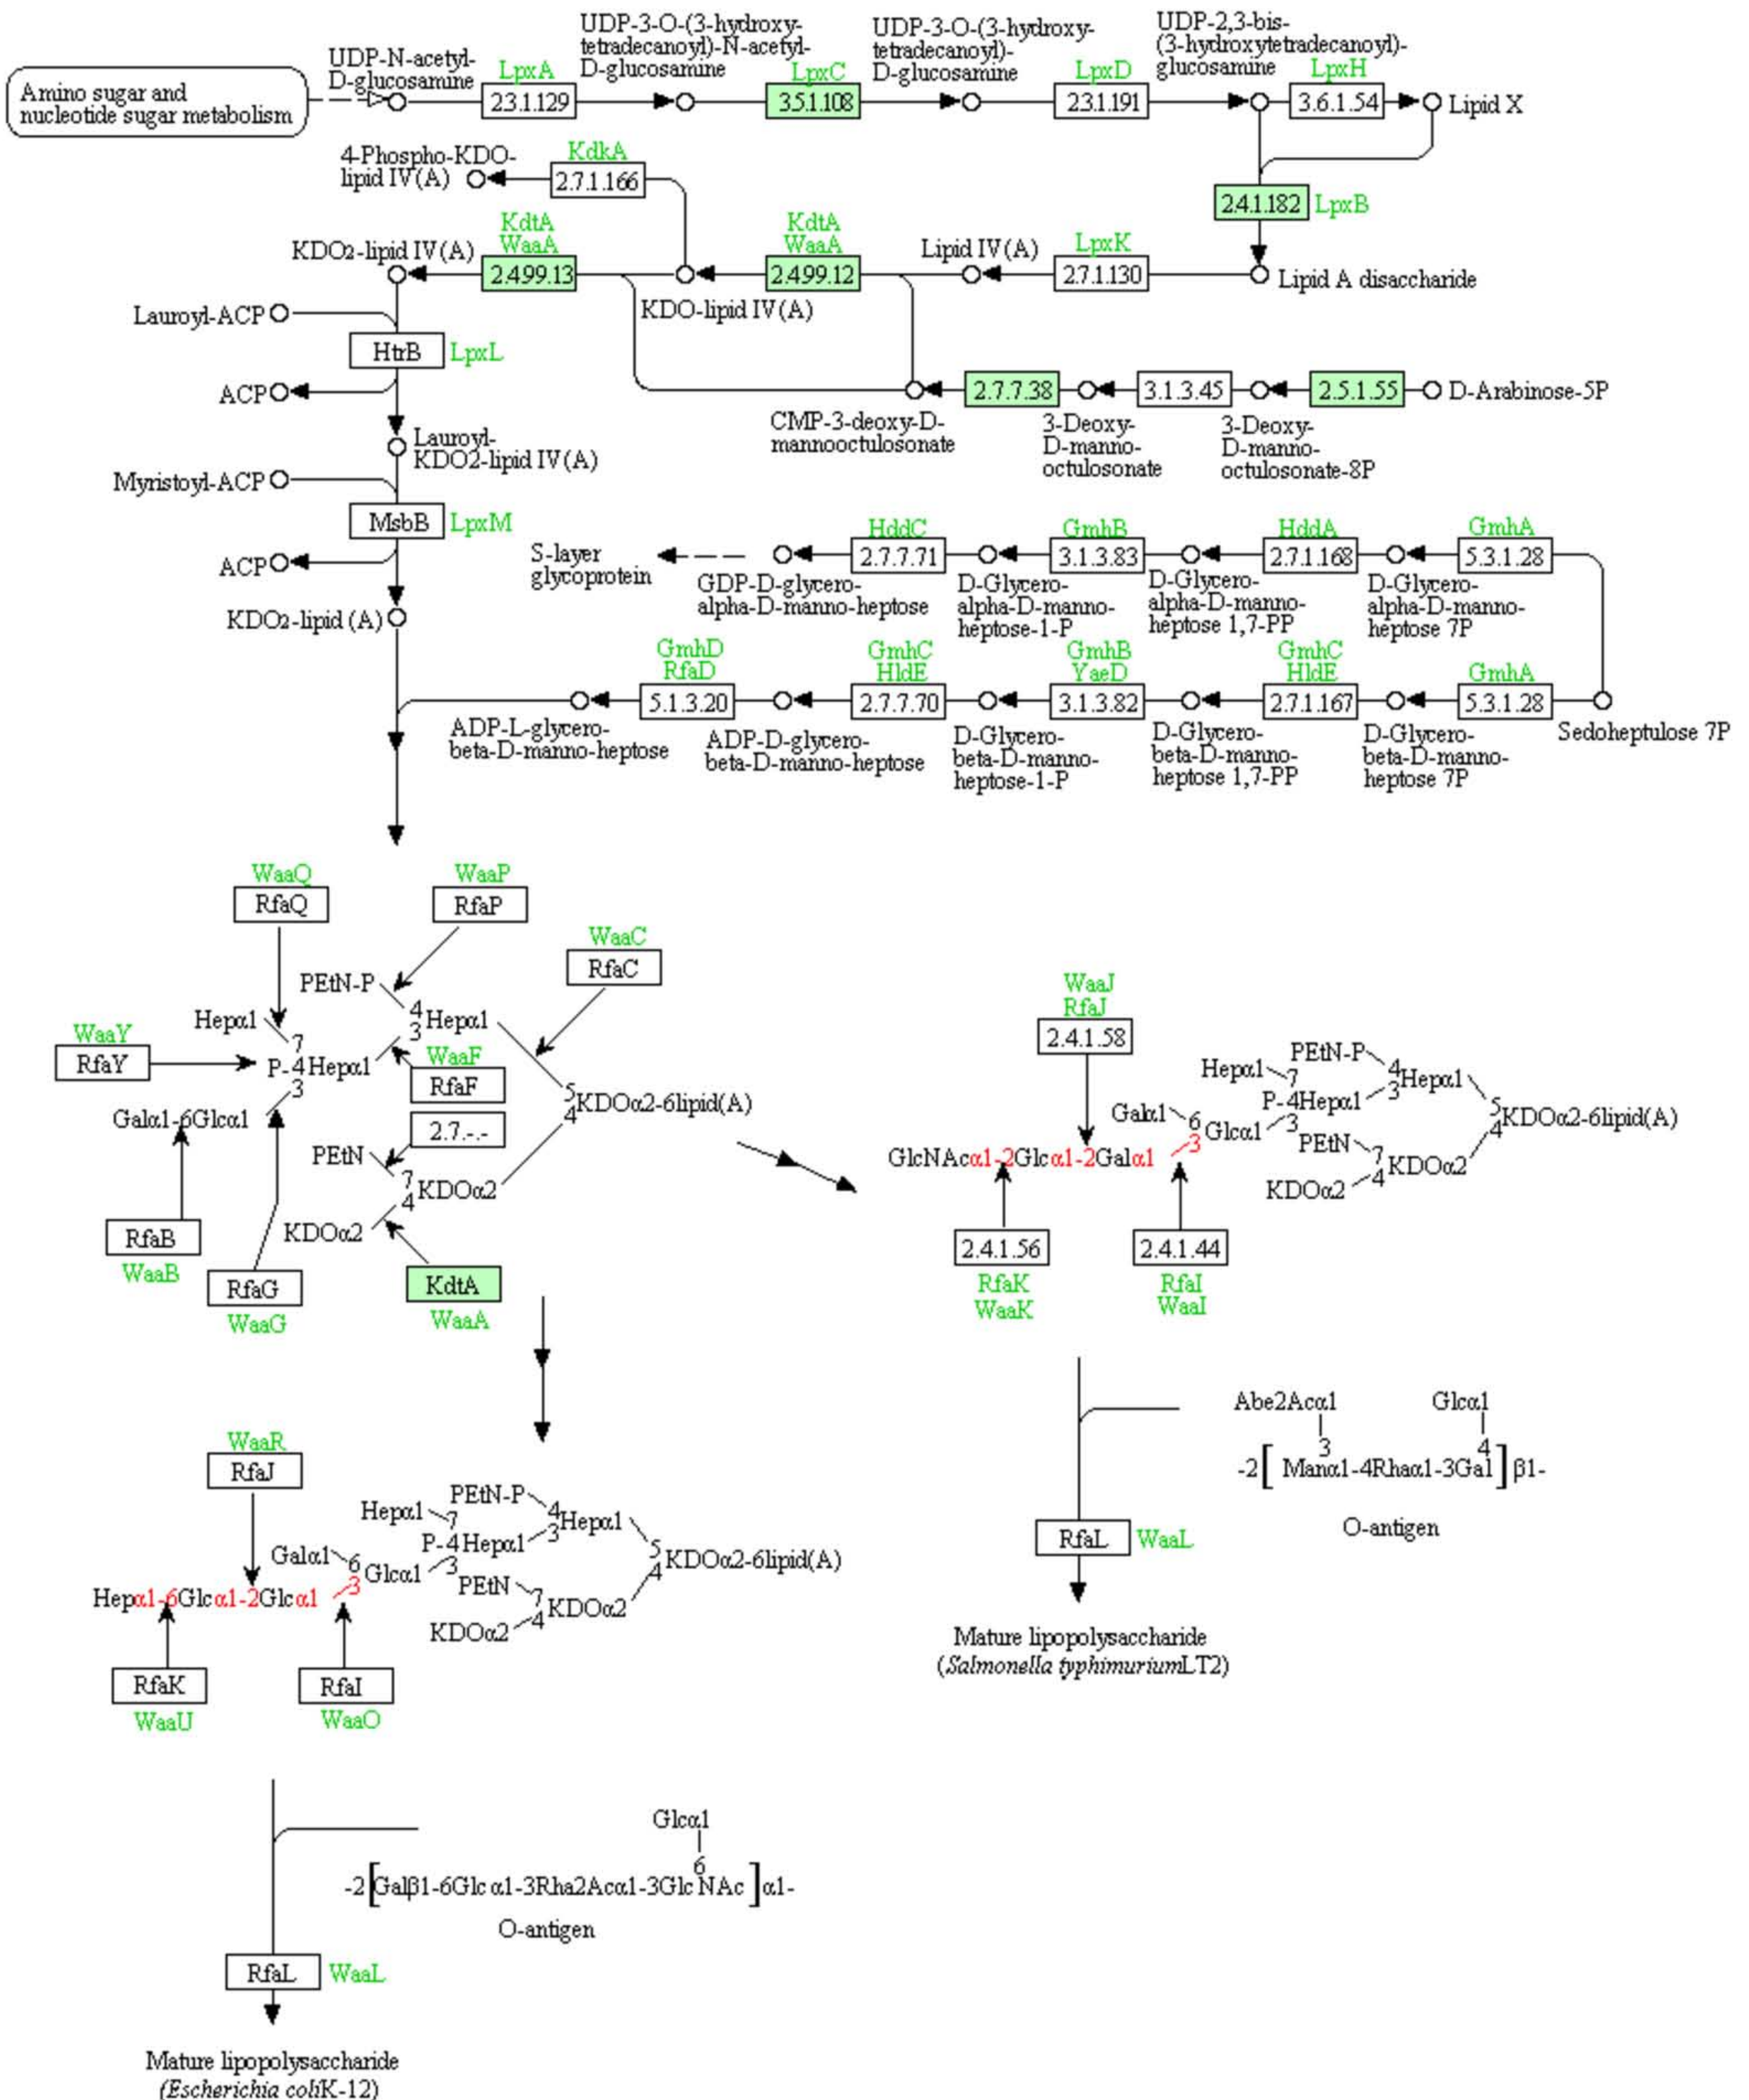



# LYSINE BIOSYNTHESIS

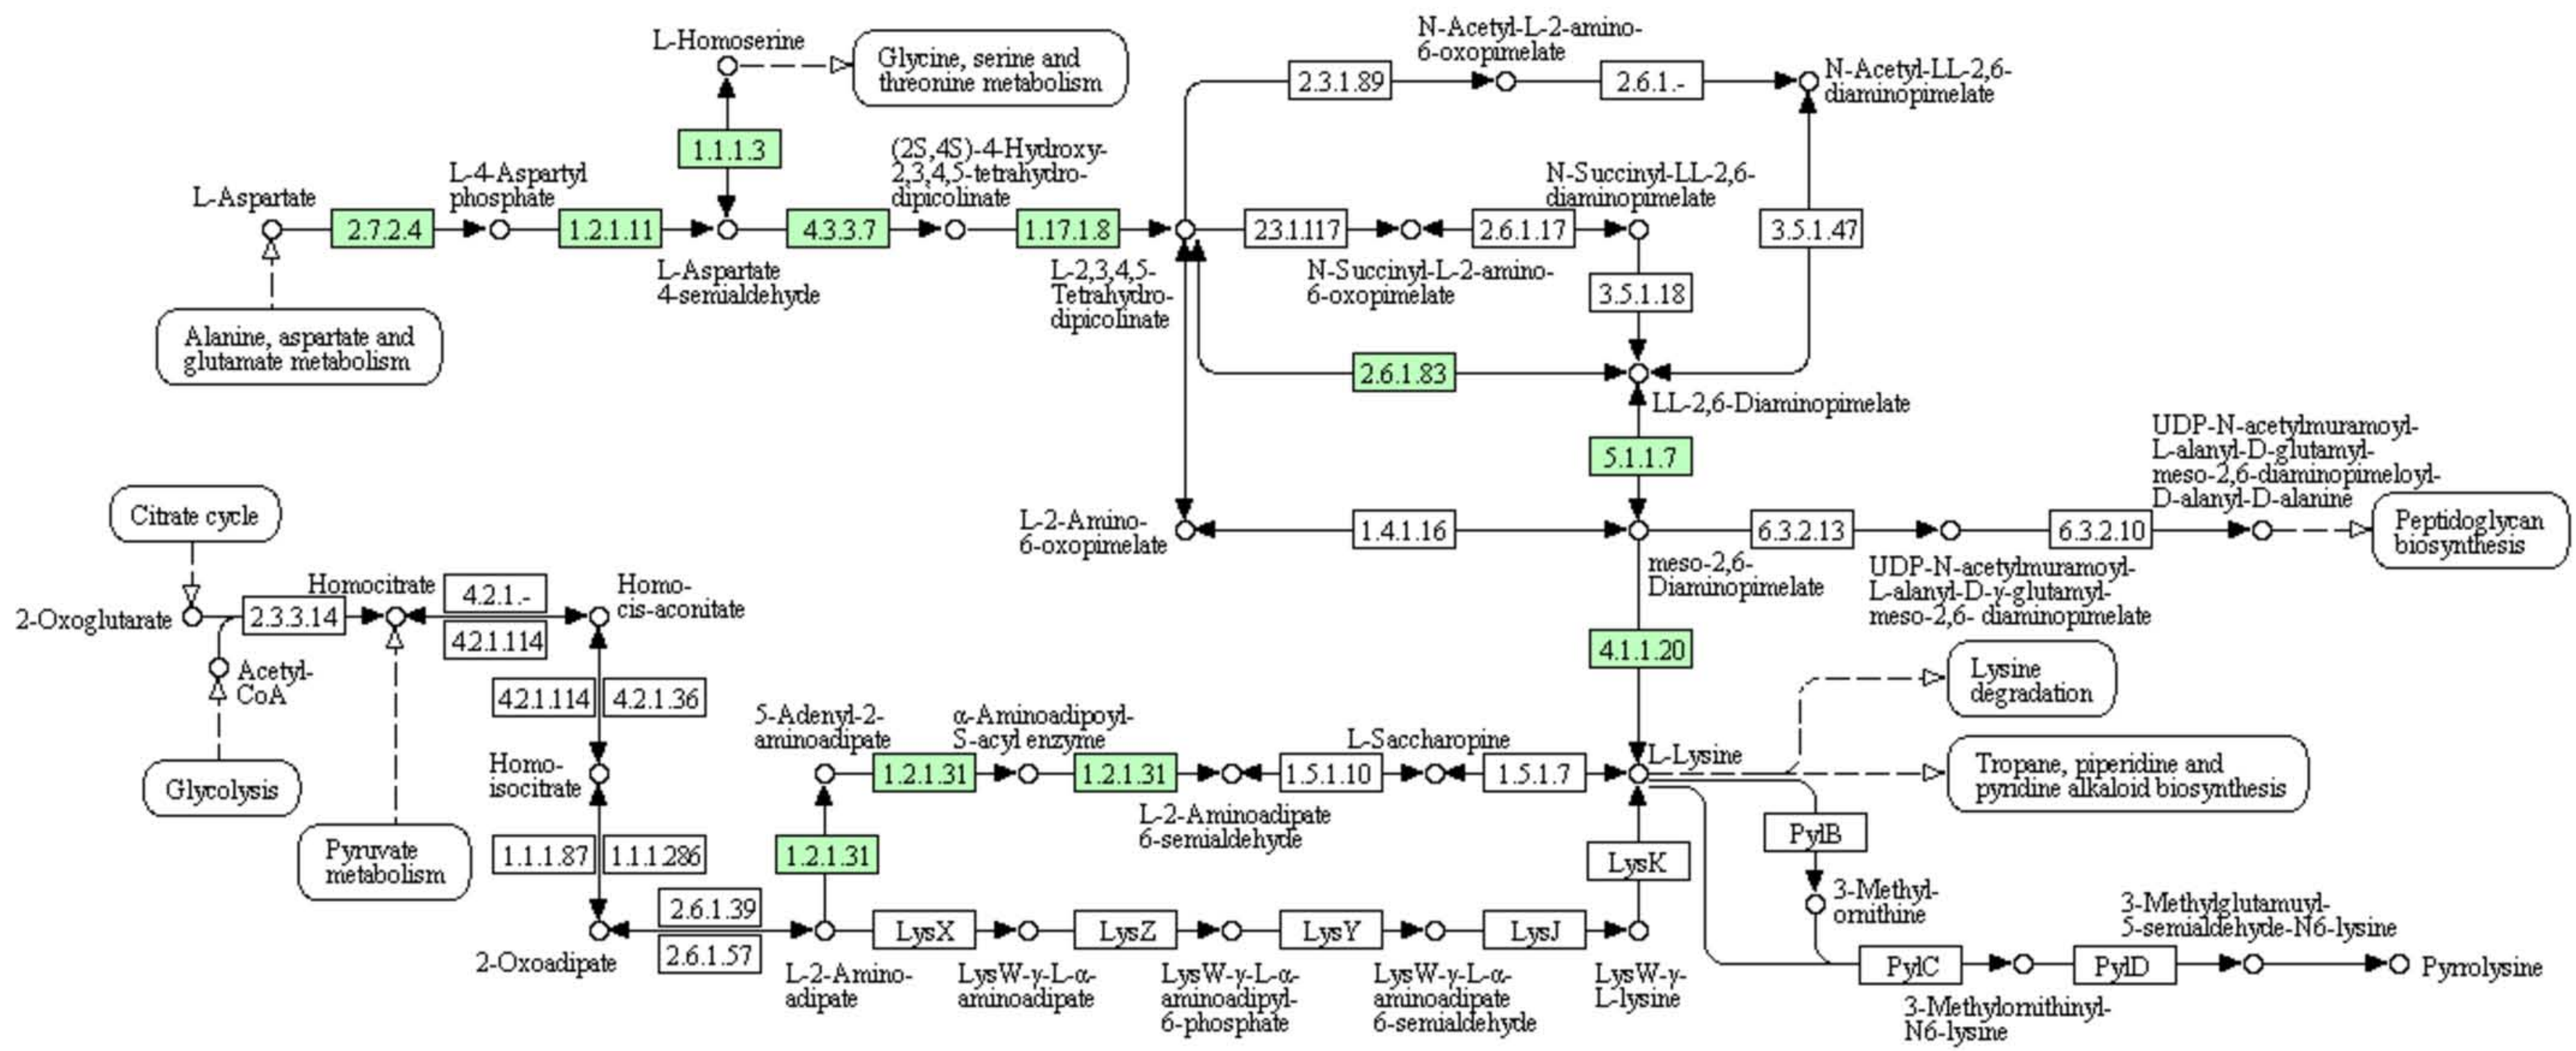



# LYSINE DEGRADATION

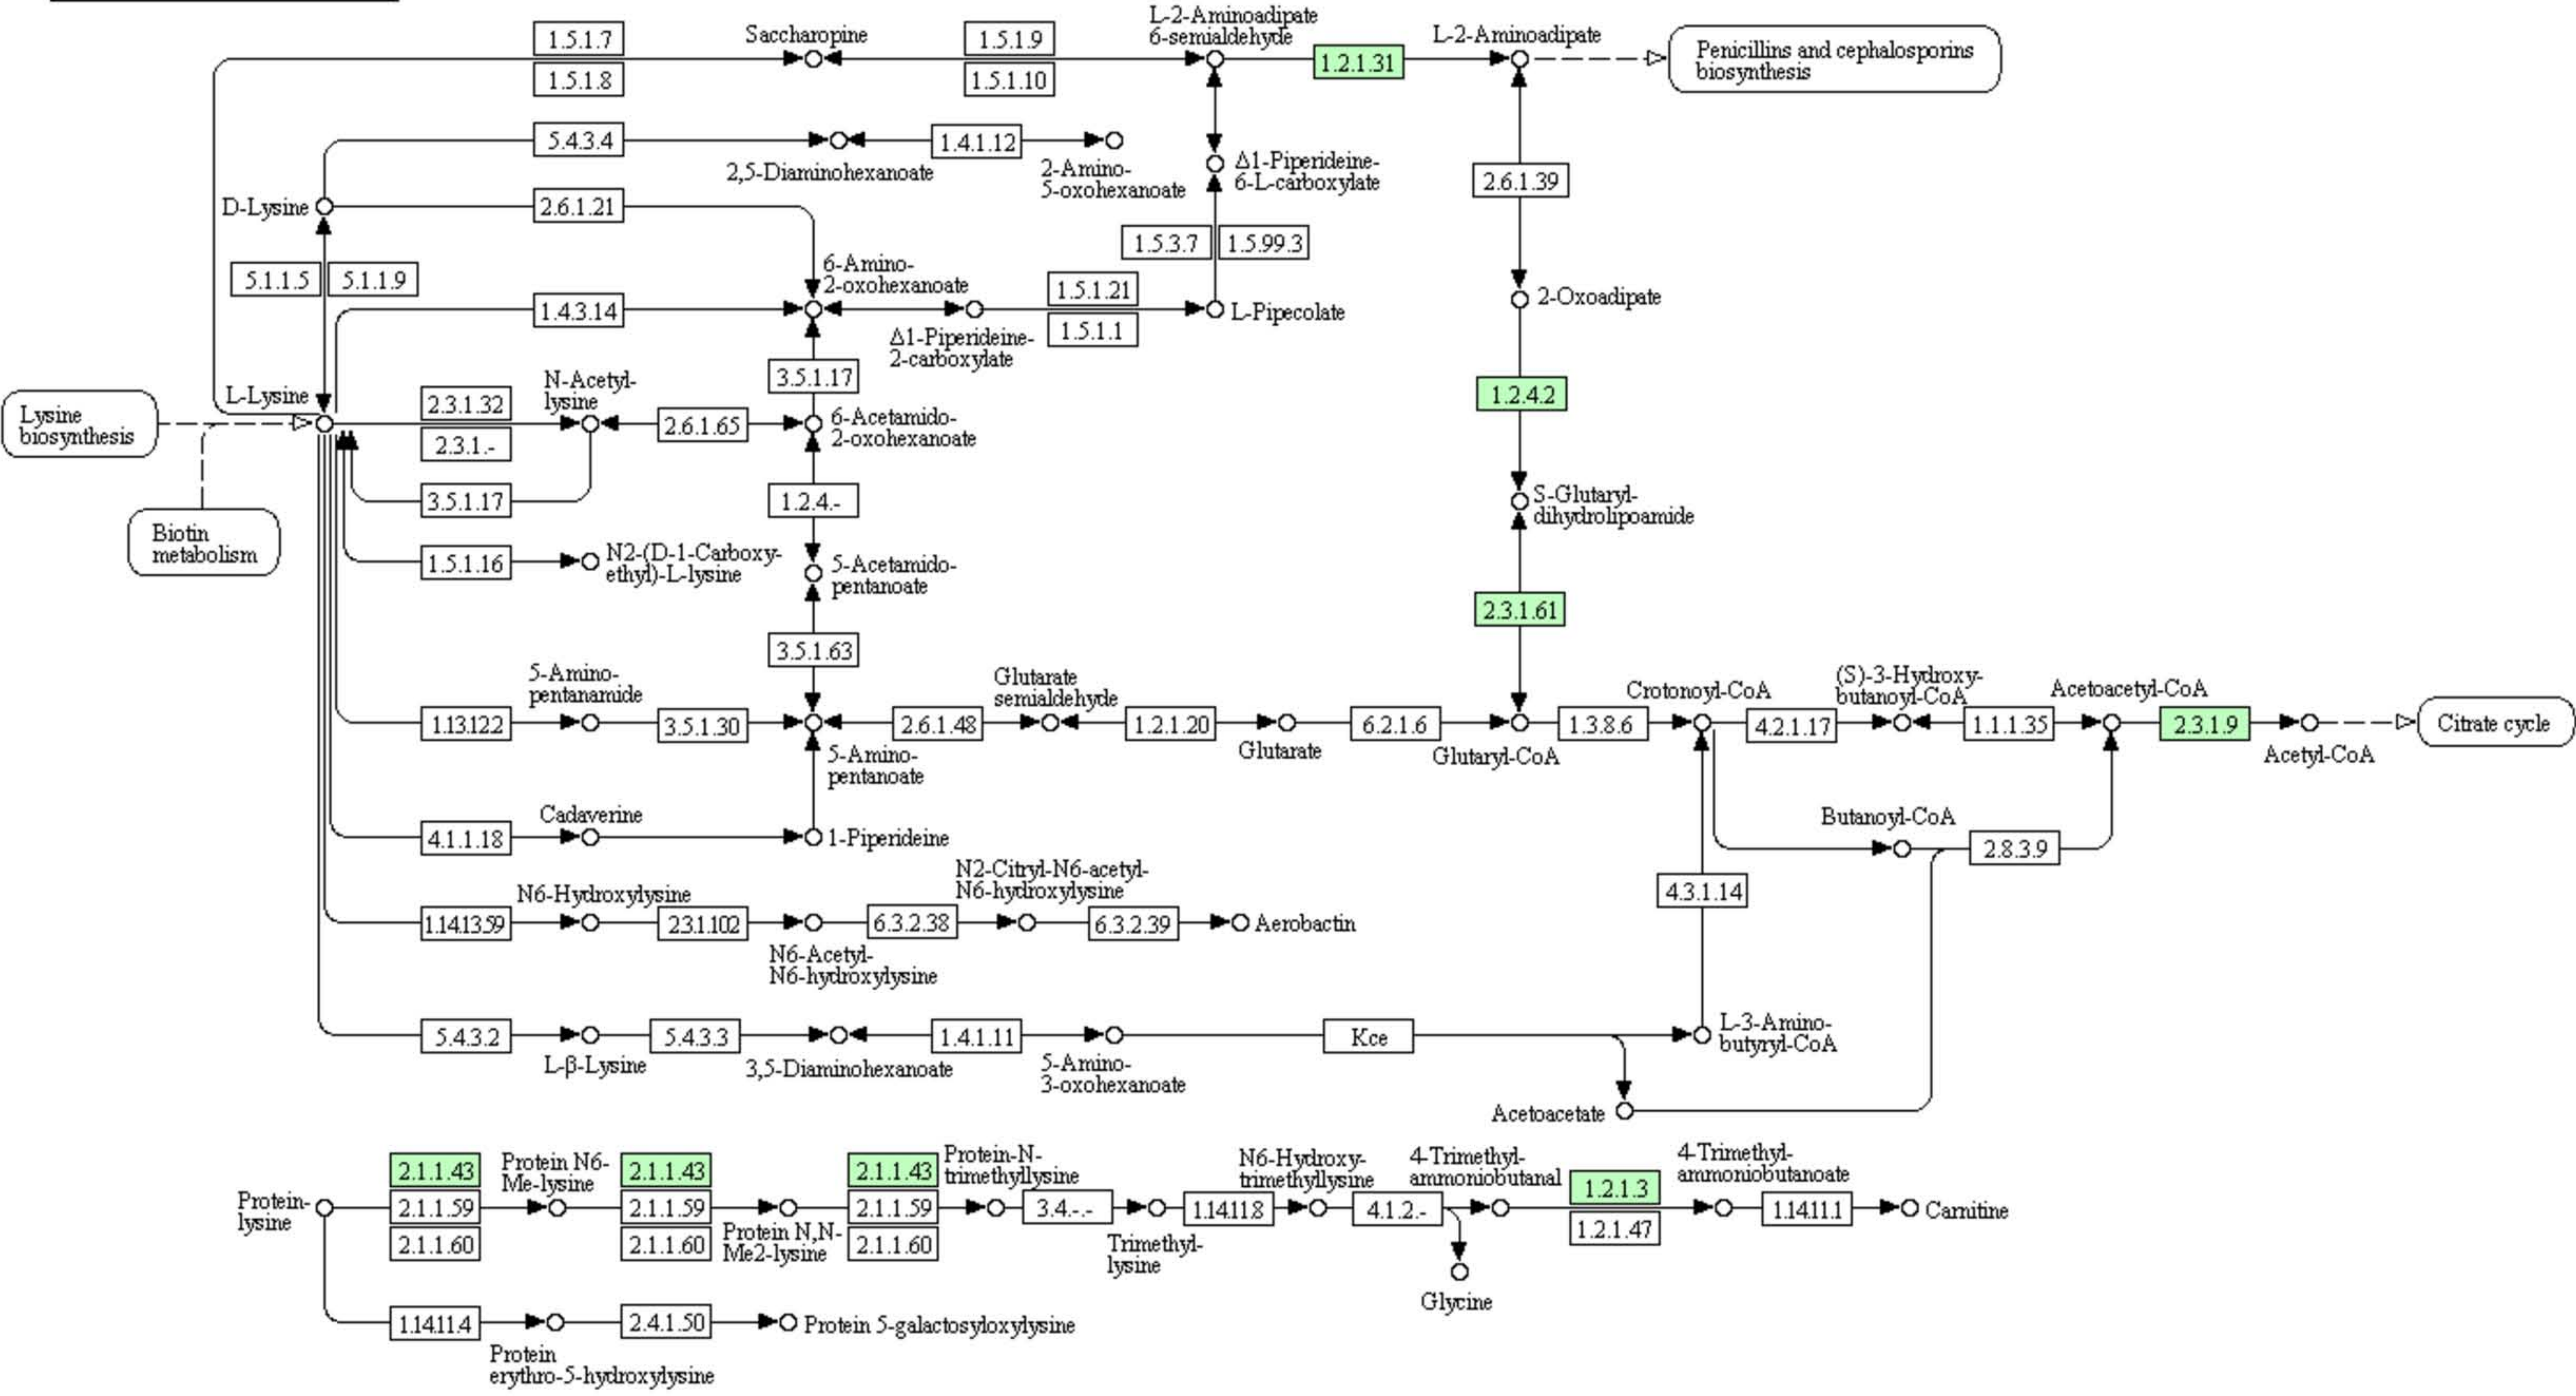



**LYSOSOME**

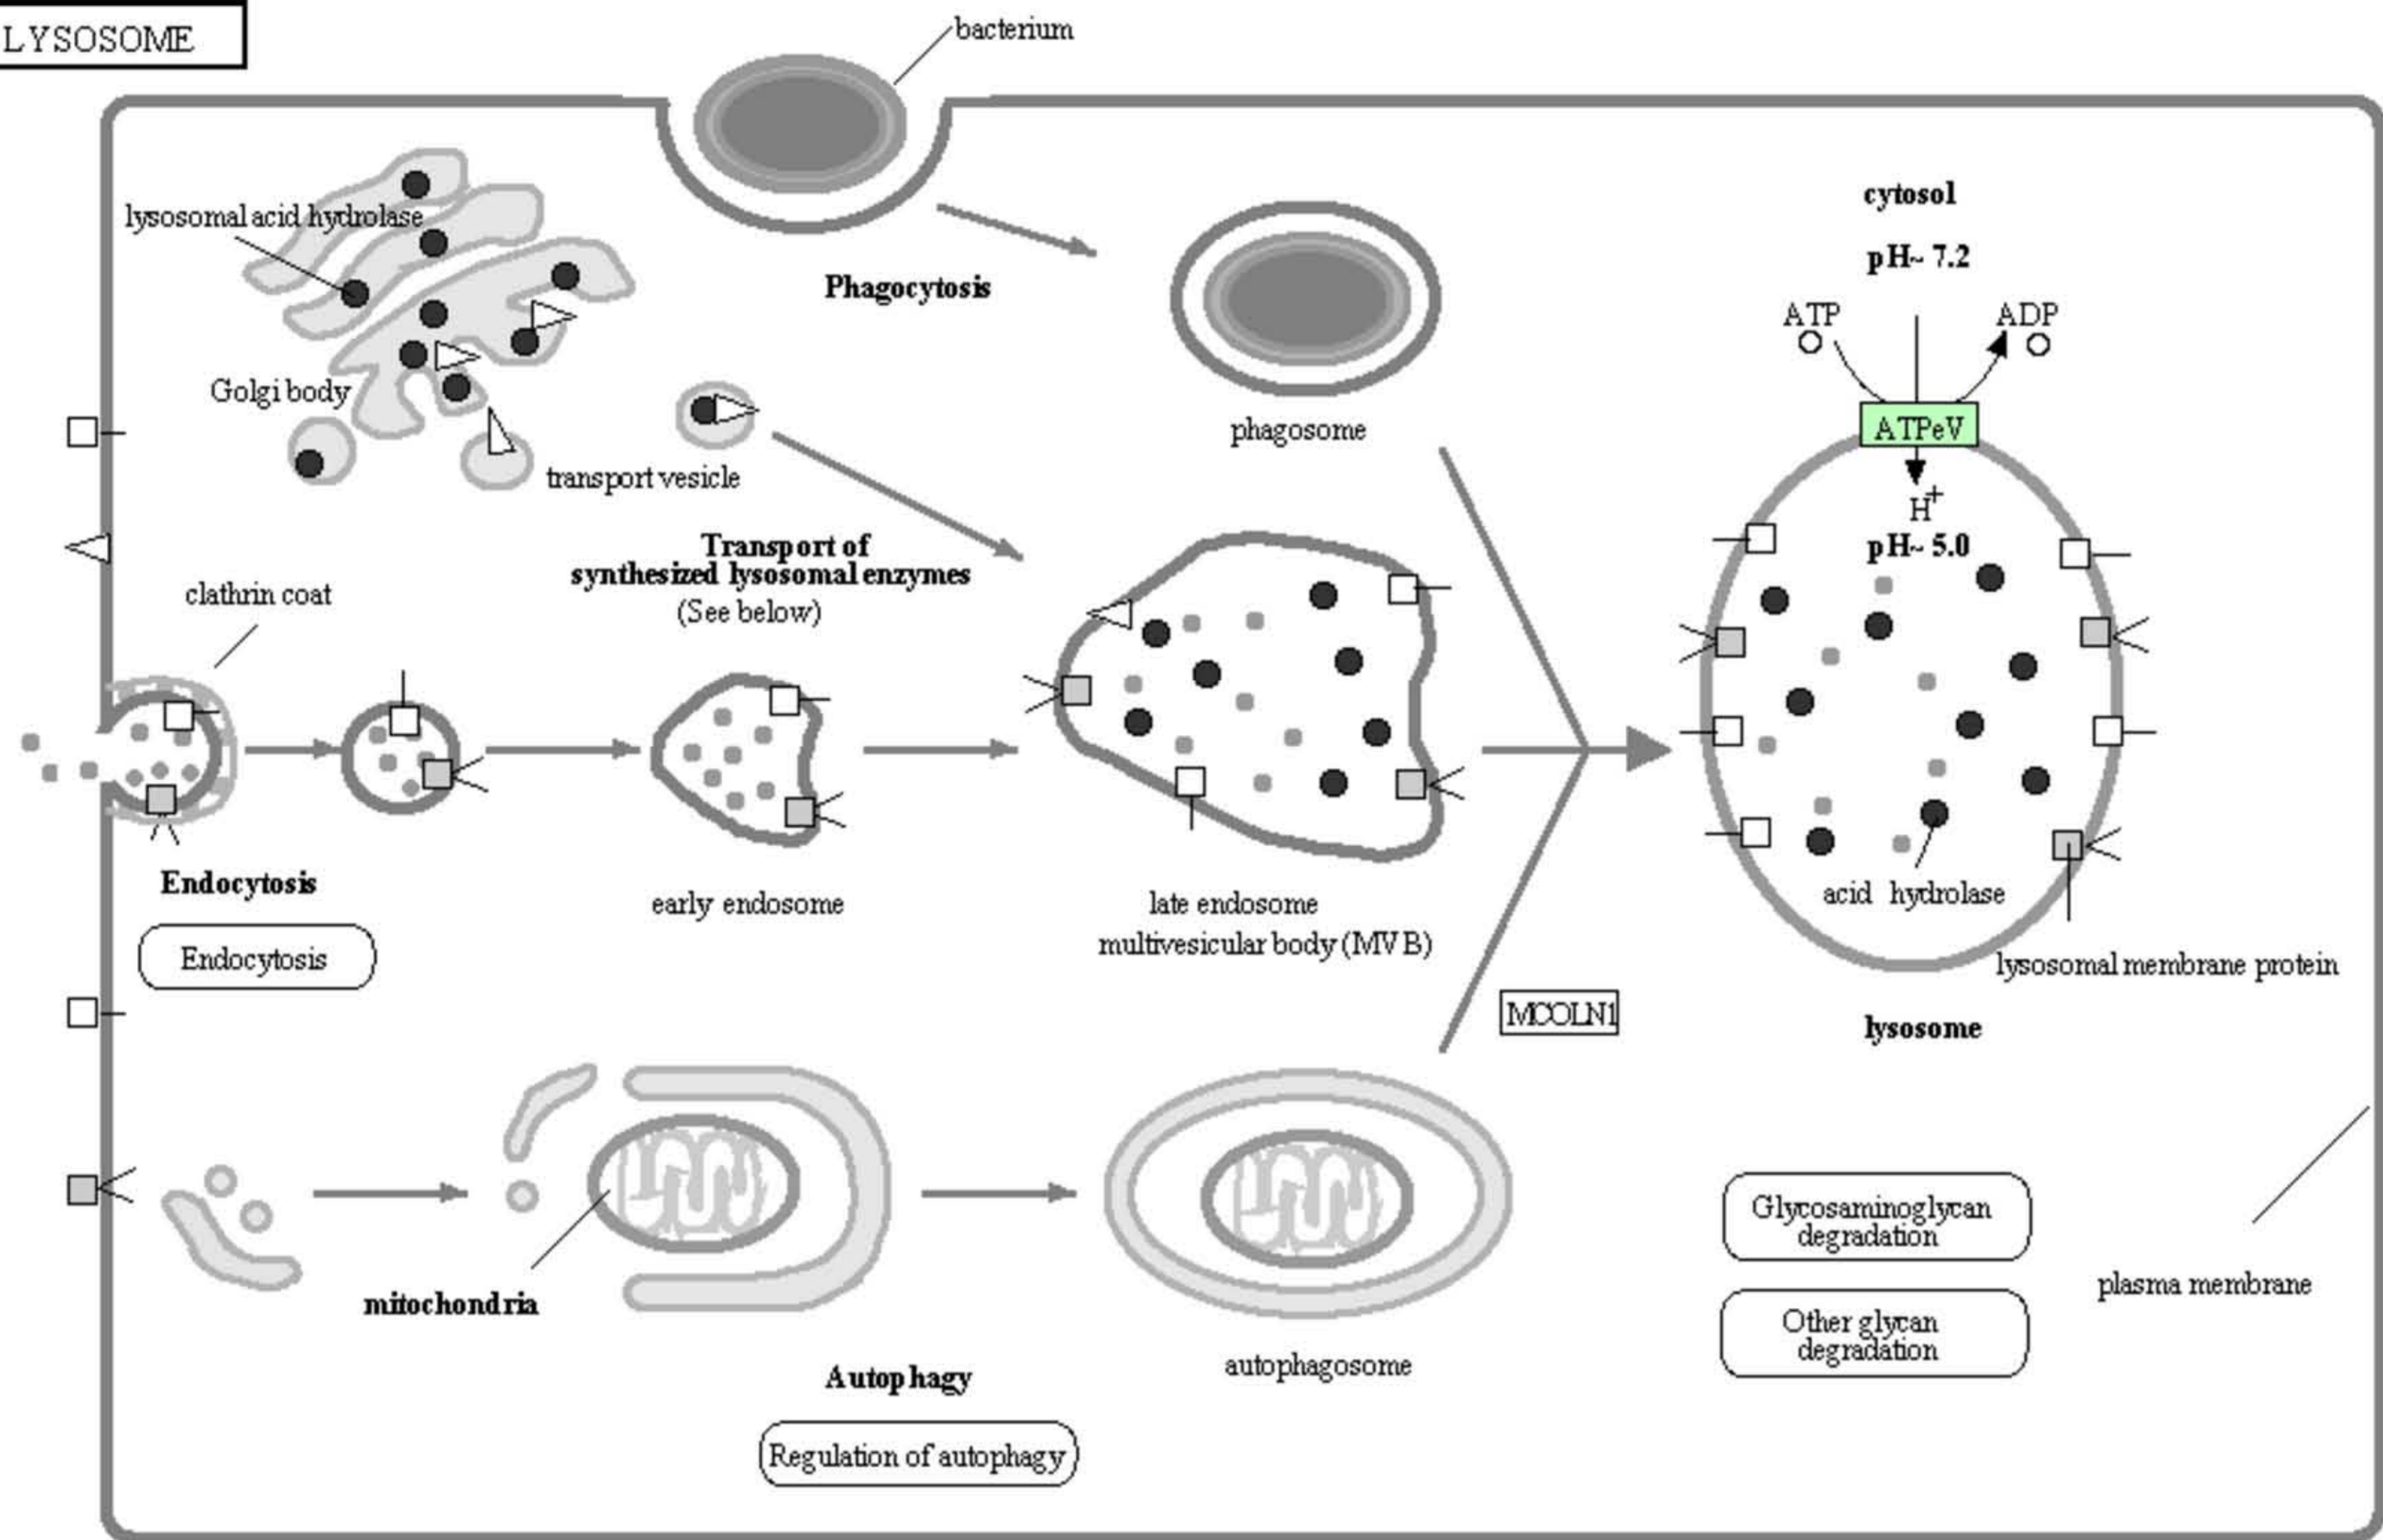

- Lysosomal acid hydrolases**
- proteases**
- cathepsins
  - napsin
  - LGMN
  - TPP1
- glycosidases**
- GLA
  - GLB
  - GAA
  - GBA
  - IDUA
  - NAGA
  - NAGLU
  - GALC
  - GUSB
  - FUCA1
  - HEXA/B
  - MANB
  - LAMAN
  - NEU1
  - HYAL1
- sulfatases**
- ARS
  - GALNS
  - GNS
  - IDS
  - SGSH
- lipases**
- LIPA
  - LYPLA3
- nuclease**
- DNaseII
- phosphatase**
- ACP2
  - ACP5
- sphingomyelinase**
- SMPD1
- ceramidase**
- ASAHI
- aspartylglucosaminidase**
- AGA
- Other lysosomal enzymes and activators**
- saposin
  - GM2A
  - CLN1
- Lysosomal membrane proteins**
- major lysosomal membrane proteins**
- LAMP
  - LIMP
- minor lysosomal membrane proteins**
- NPC
  - cystinosin
  - sialin
  - NRAMP
  - LAPTM
  - ABCA2
  - ABCB9
  - ACP2
  - endolyn
  - LALP70
  - sortilin
  - CLN3
  - CLN5
  - CLN7
  - HGSNAT
  - MCOLN1

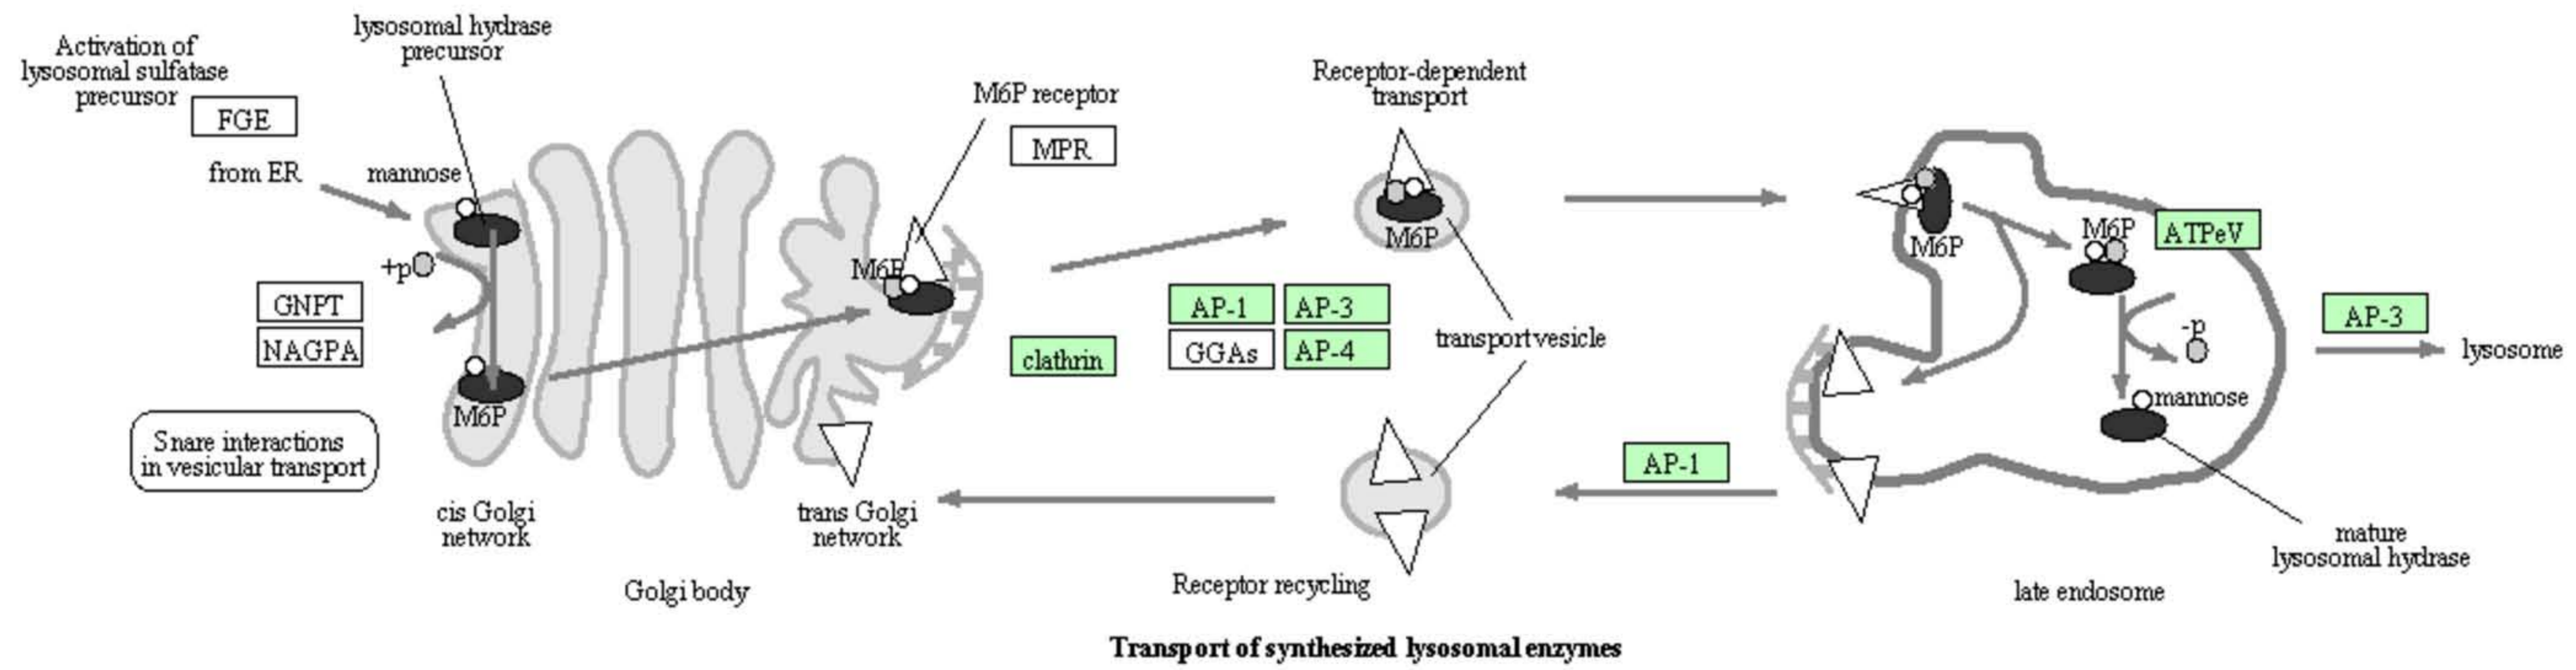



MAPK SIGNALING PATHWAY

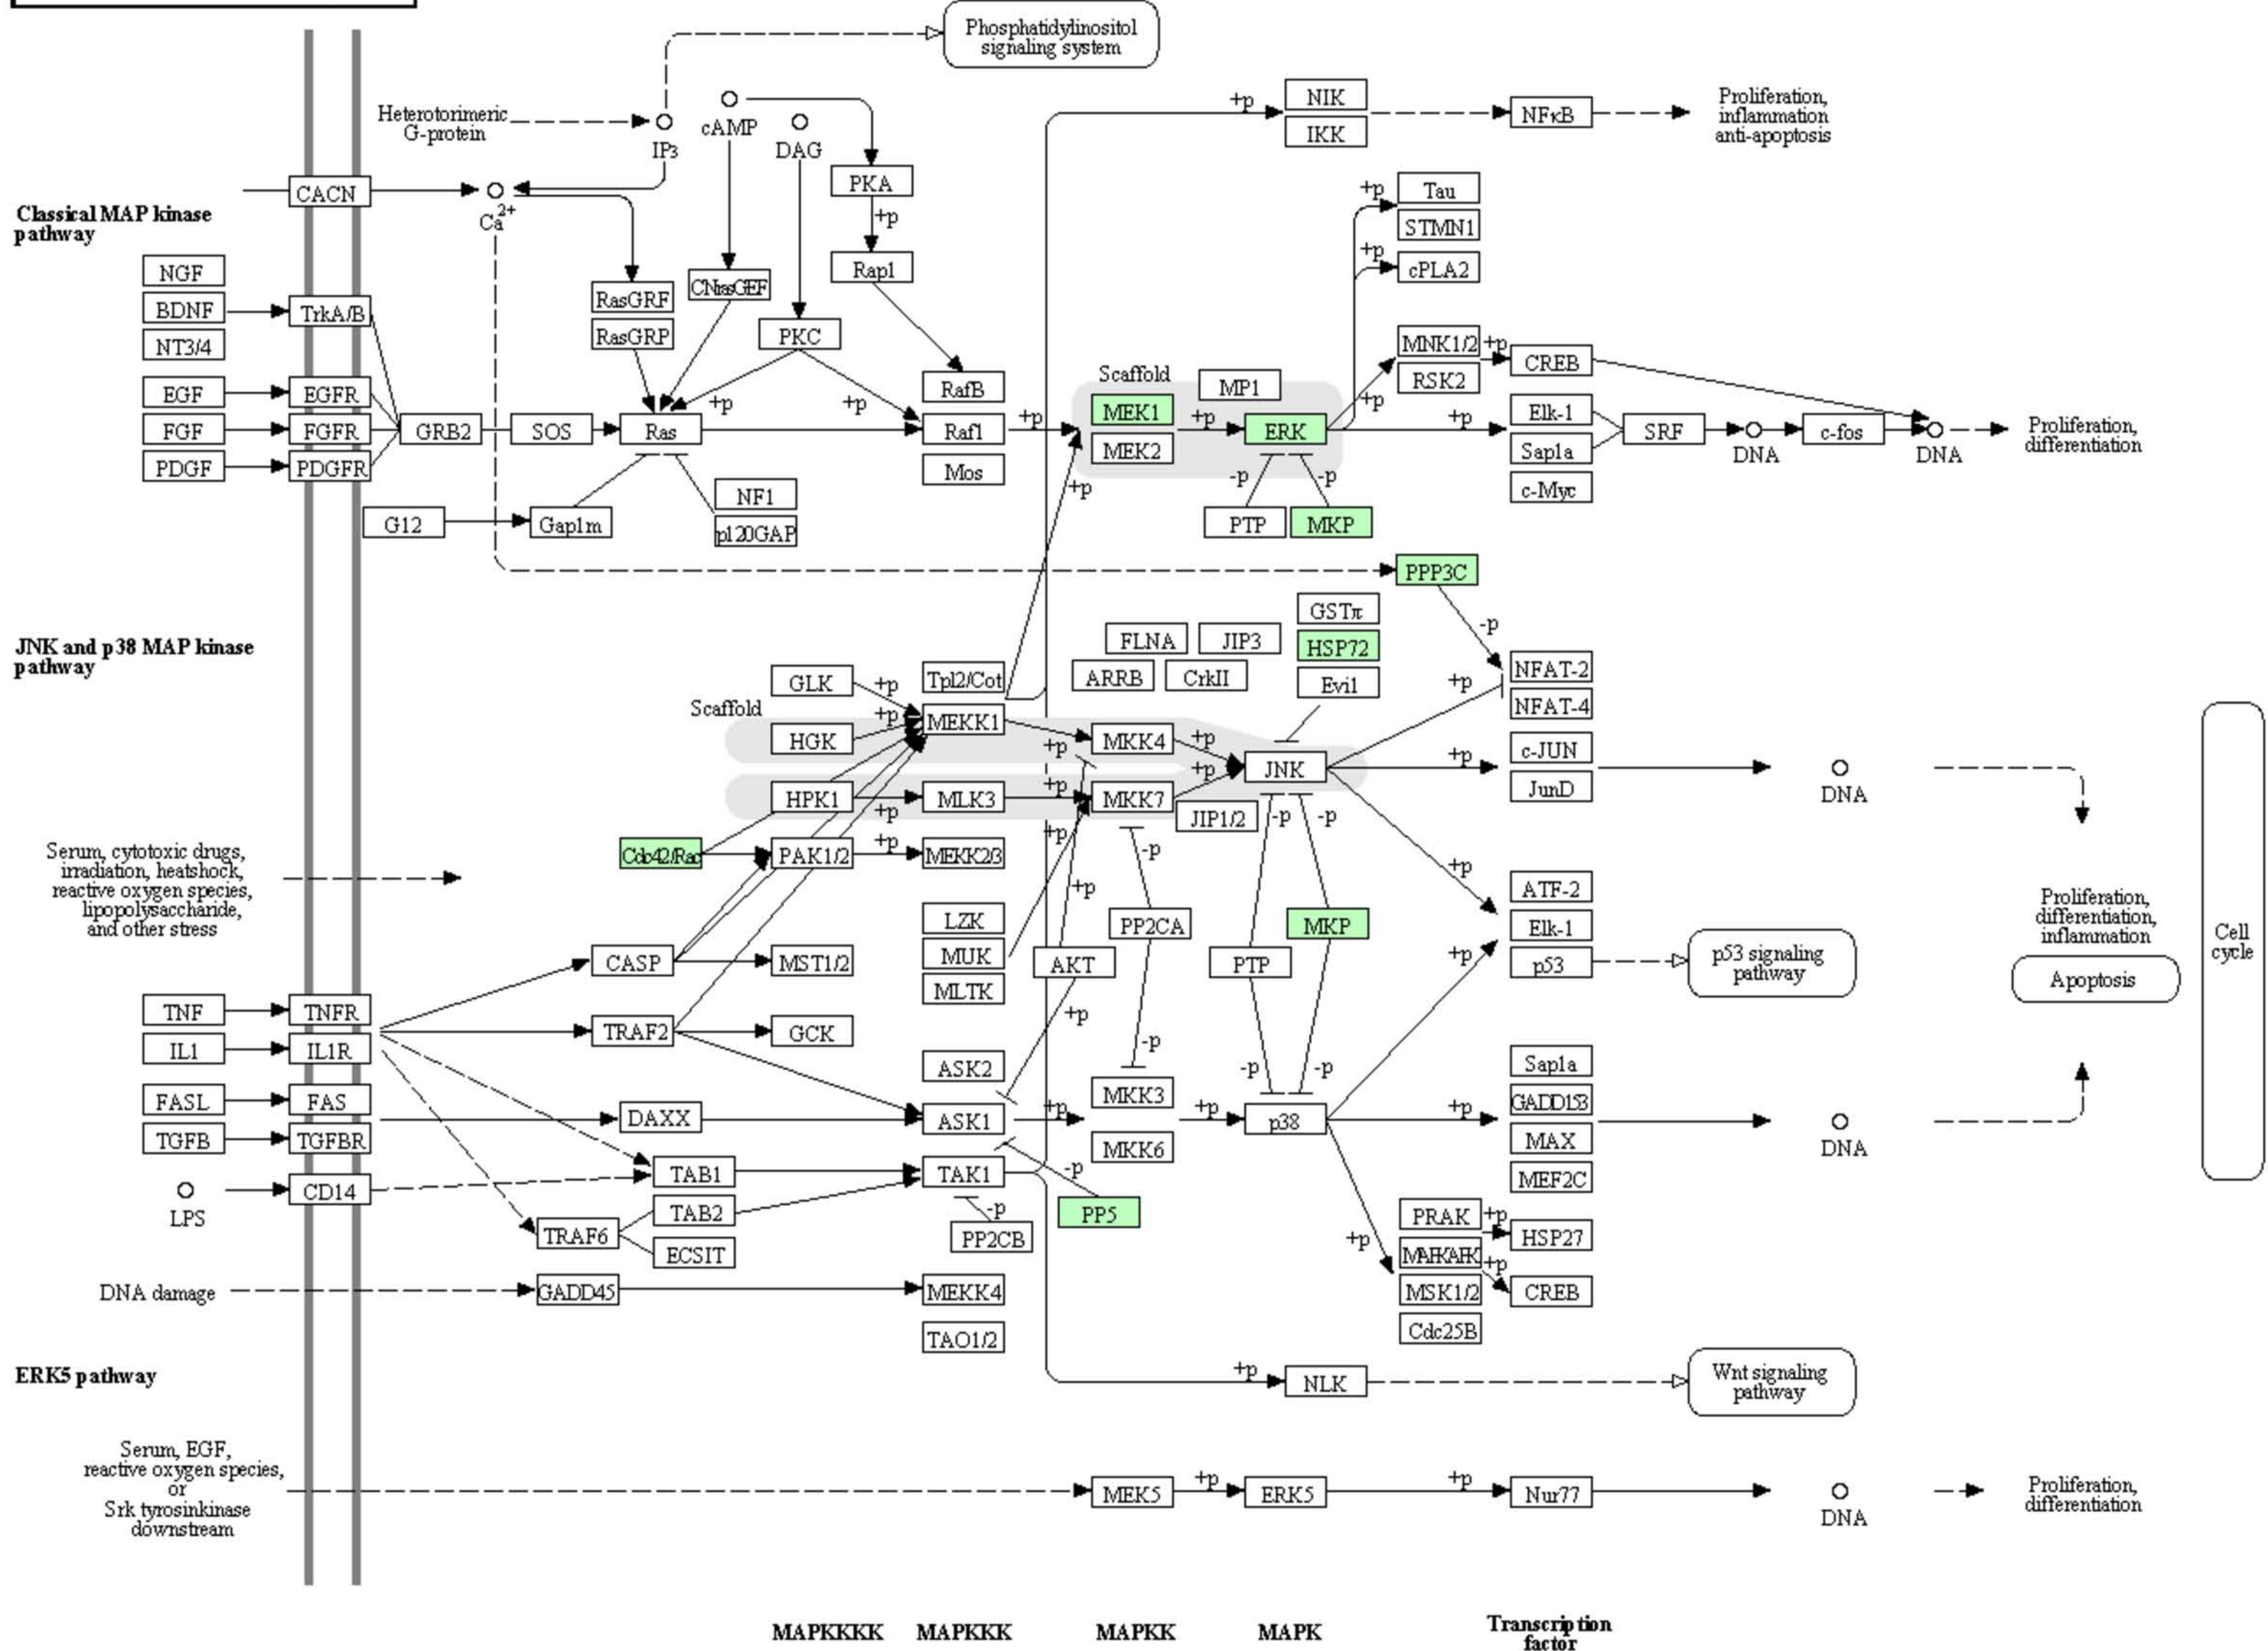



MEIOSIS - yeast

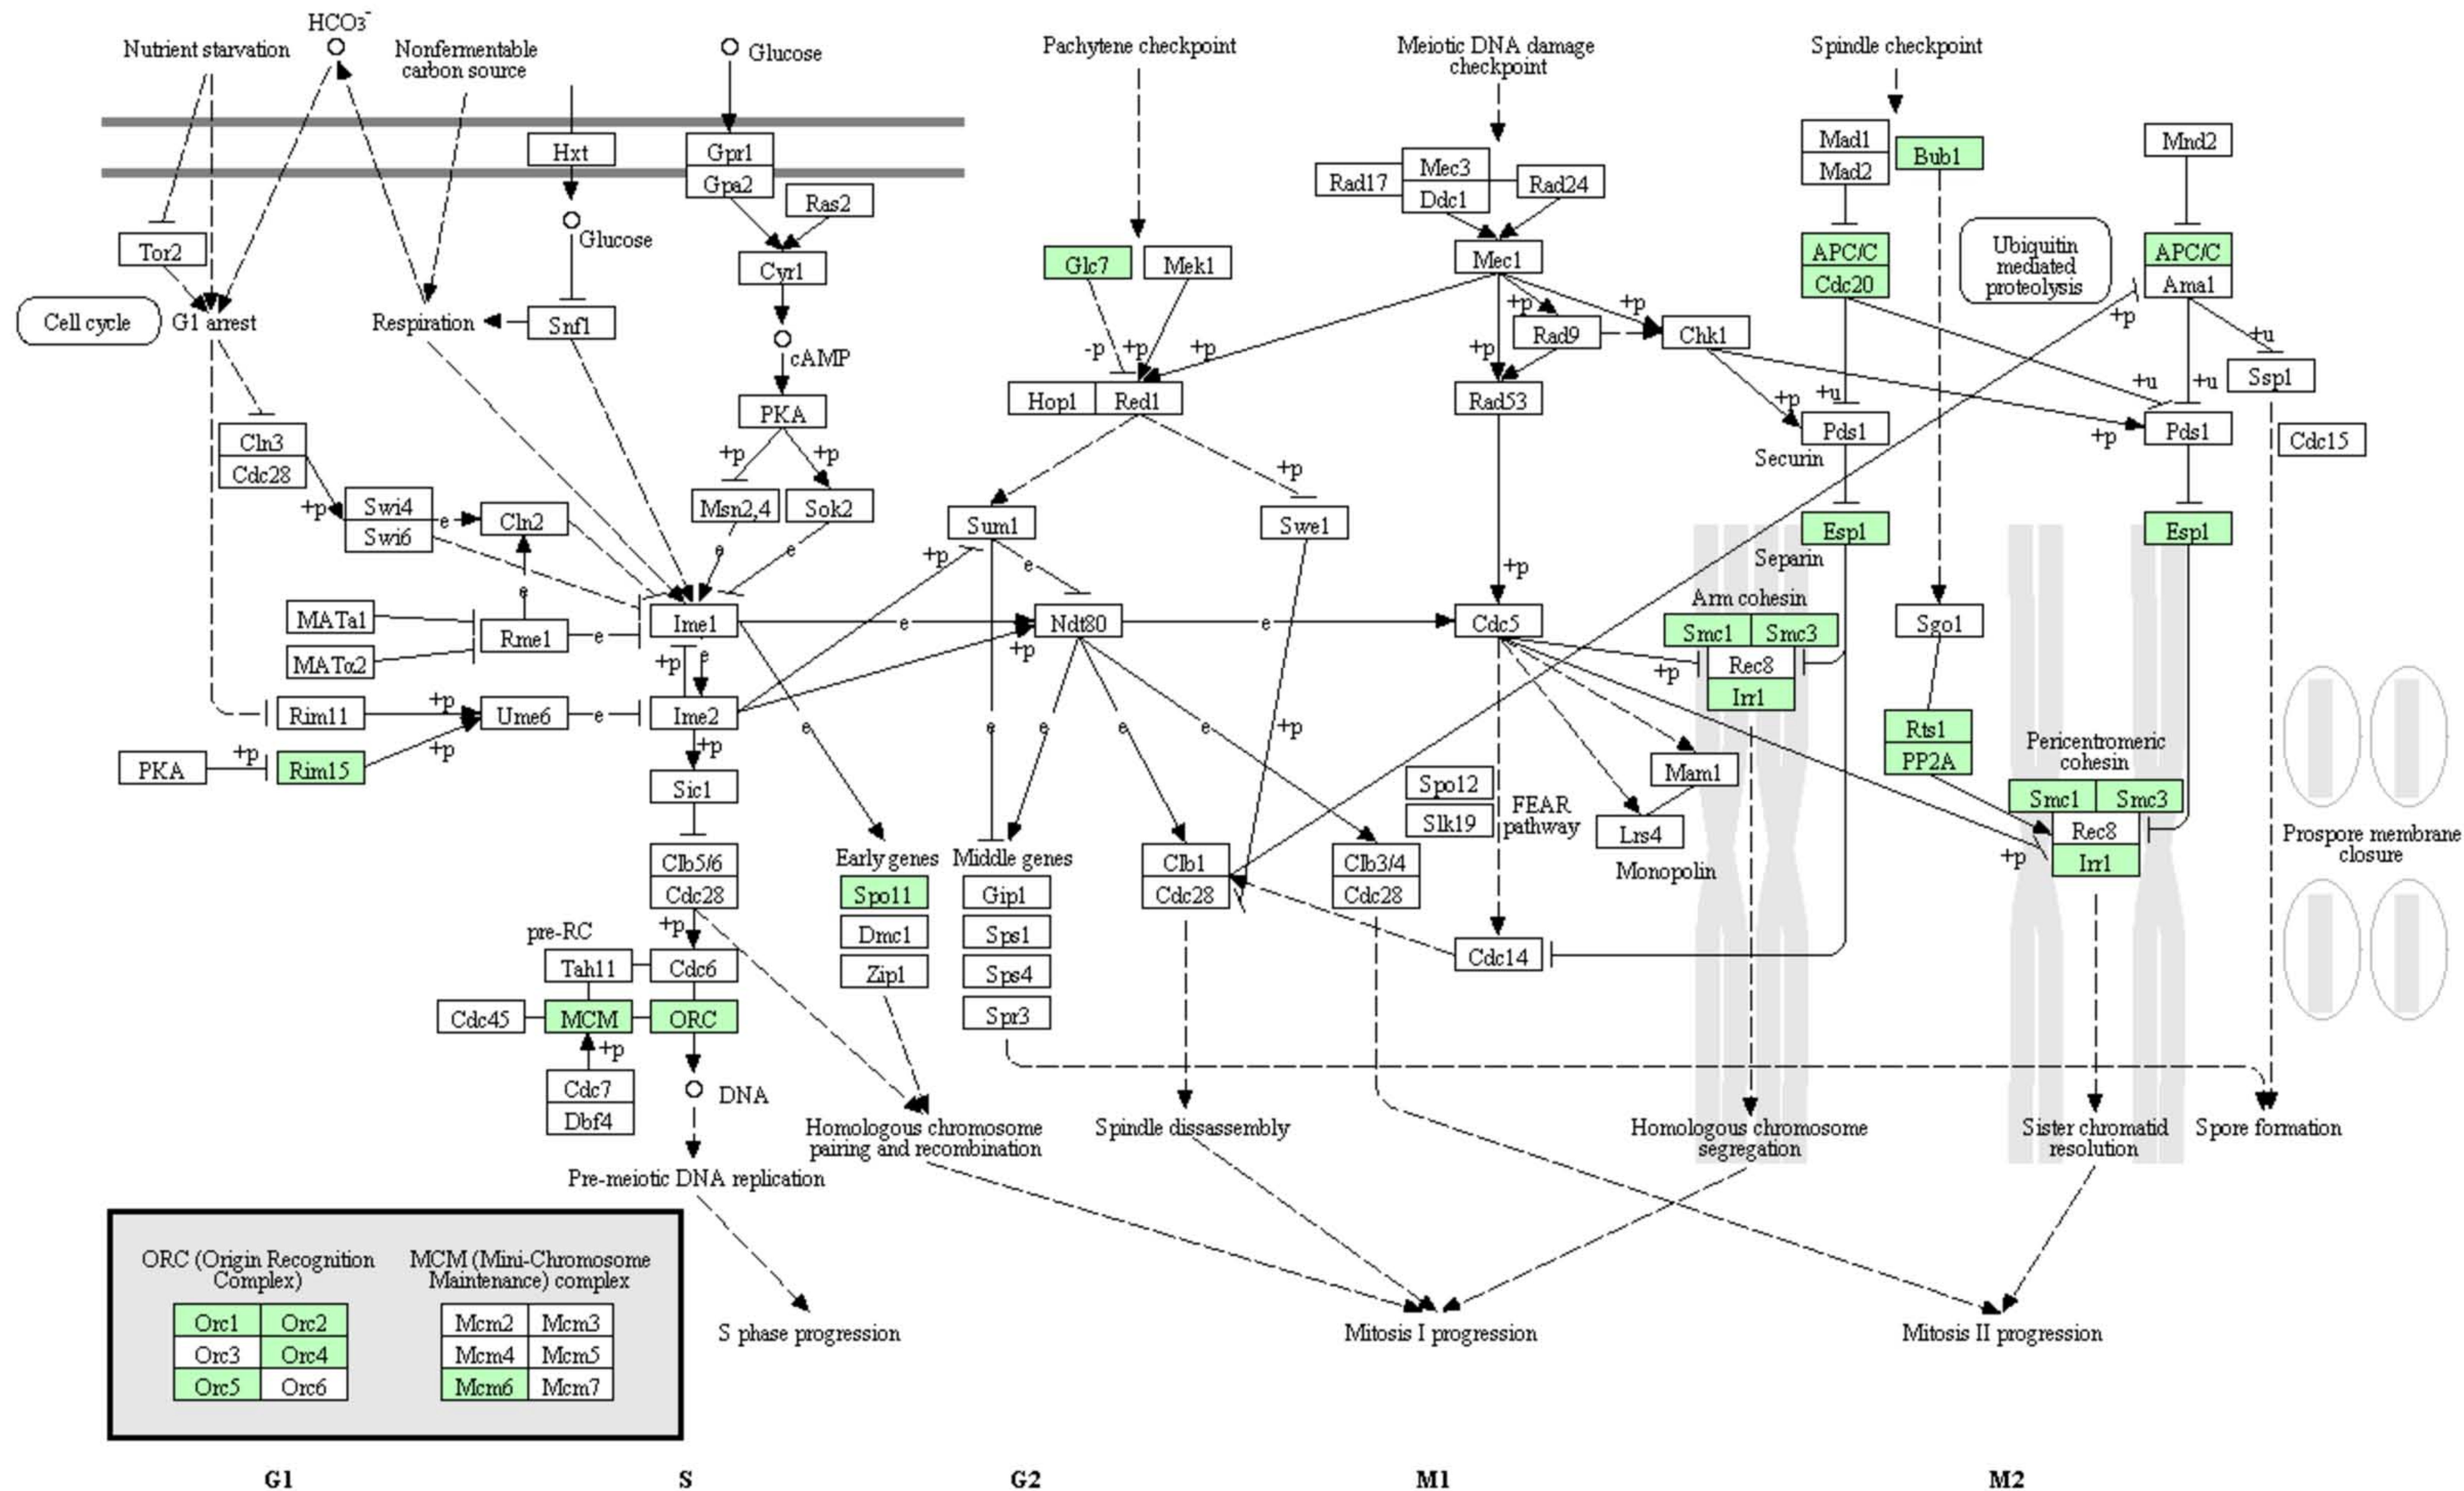



**METABOLISM OF XENOBIOTICS BY CYTOCHROME P450**

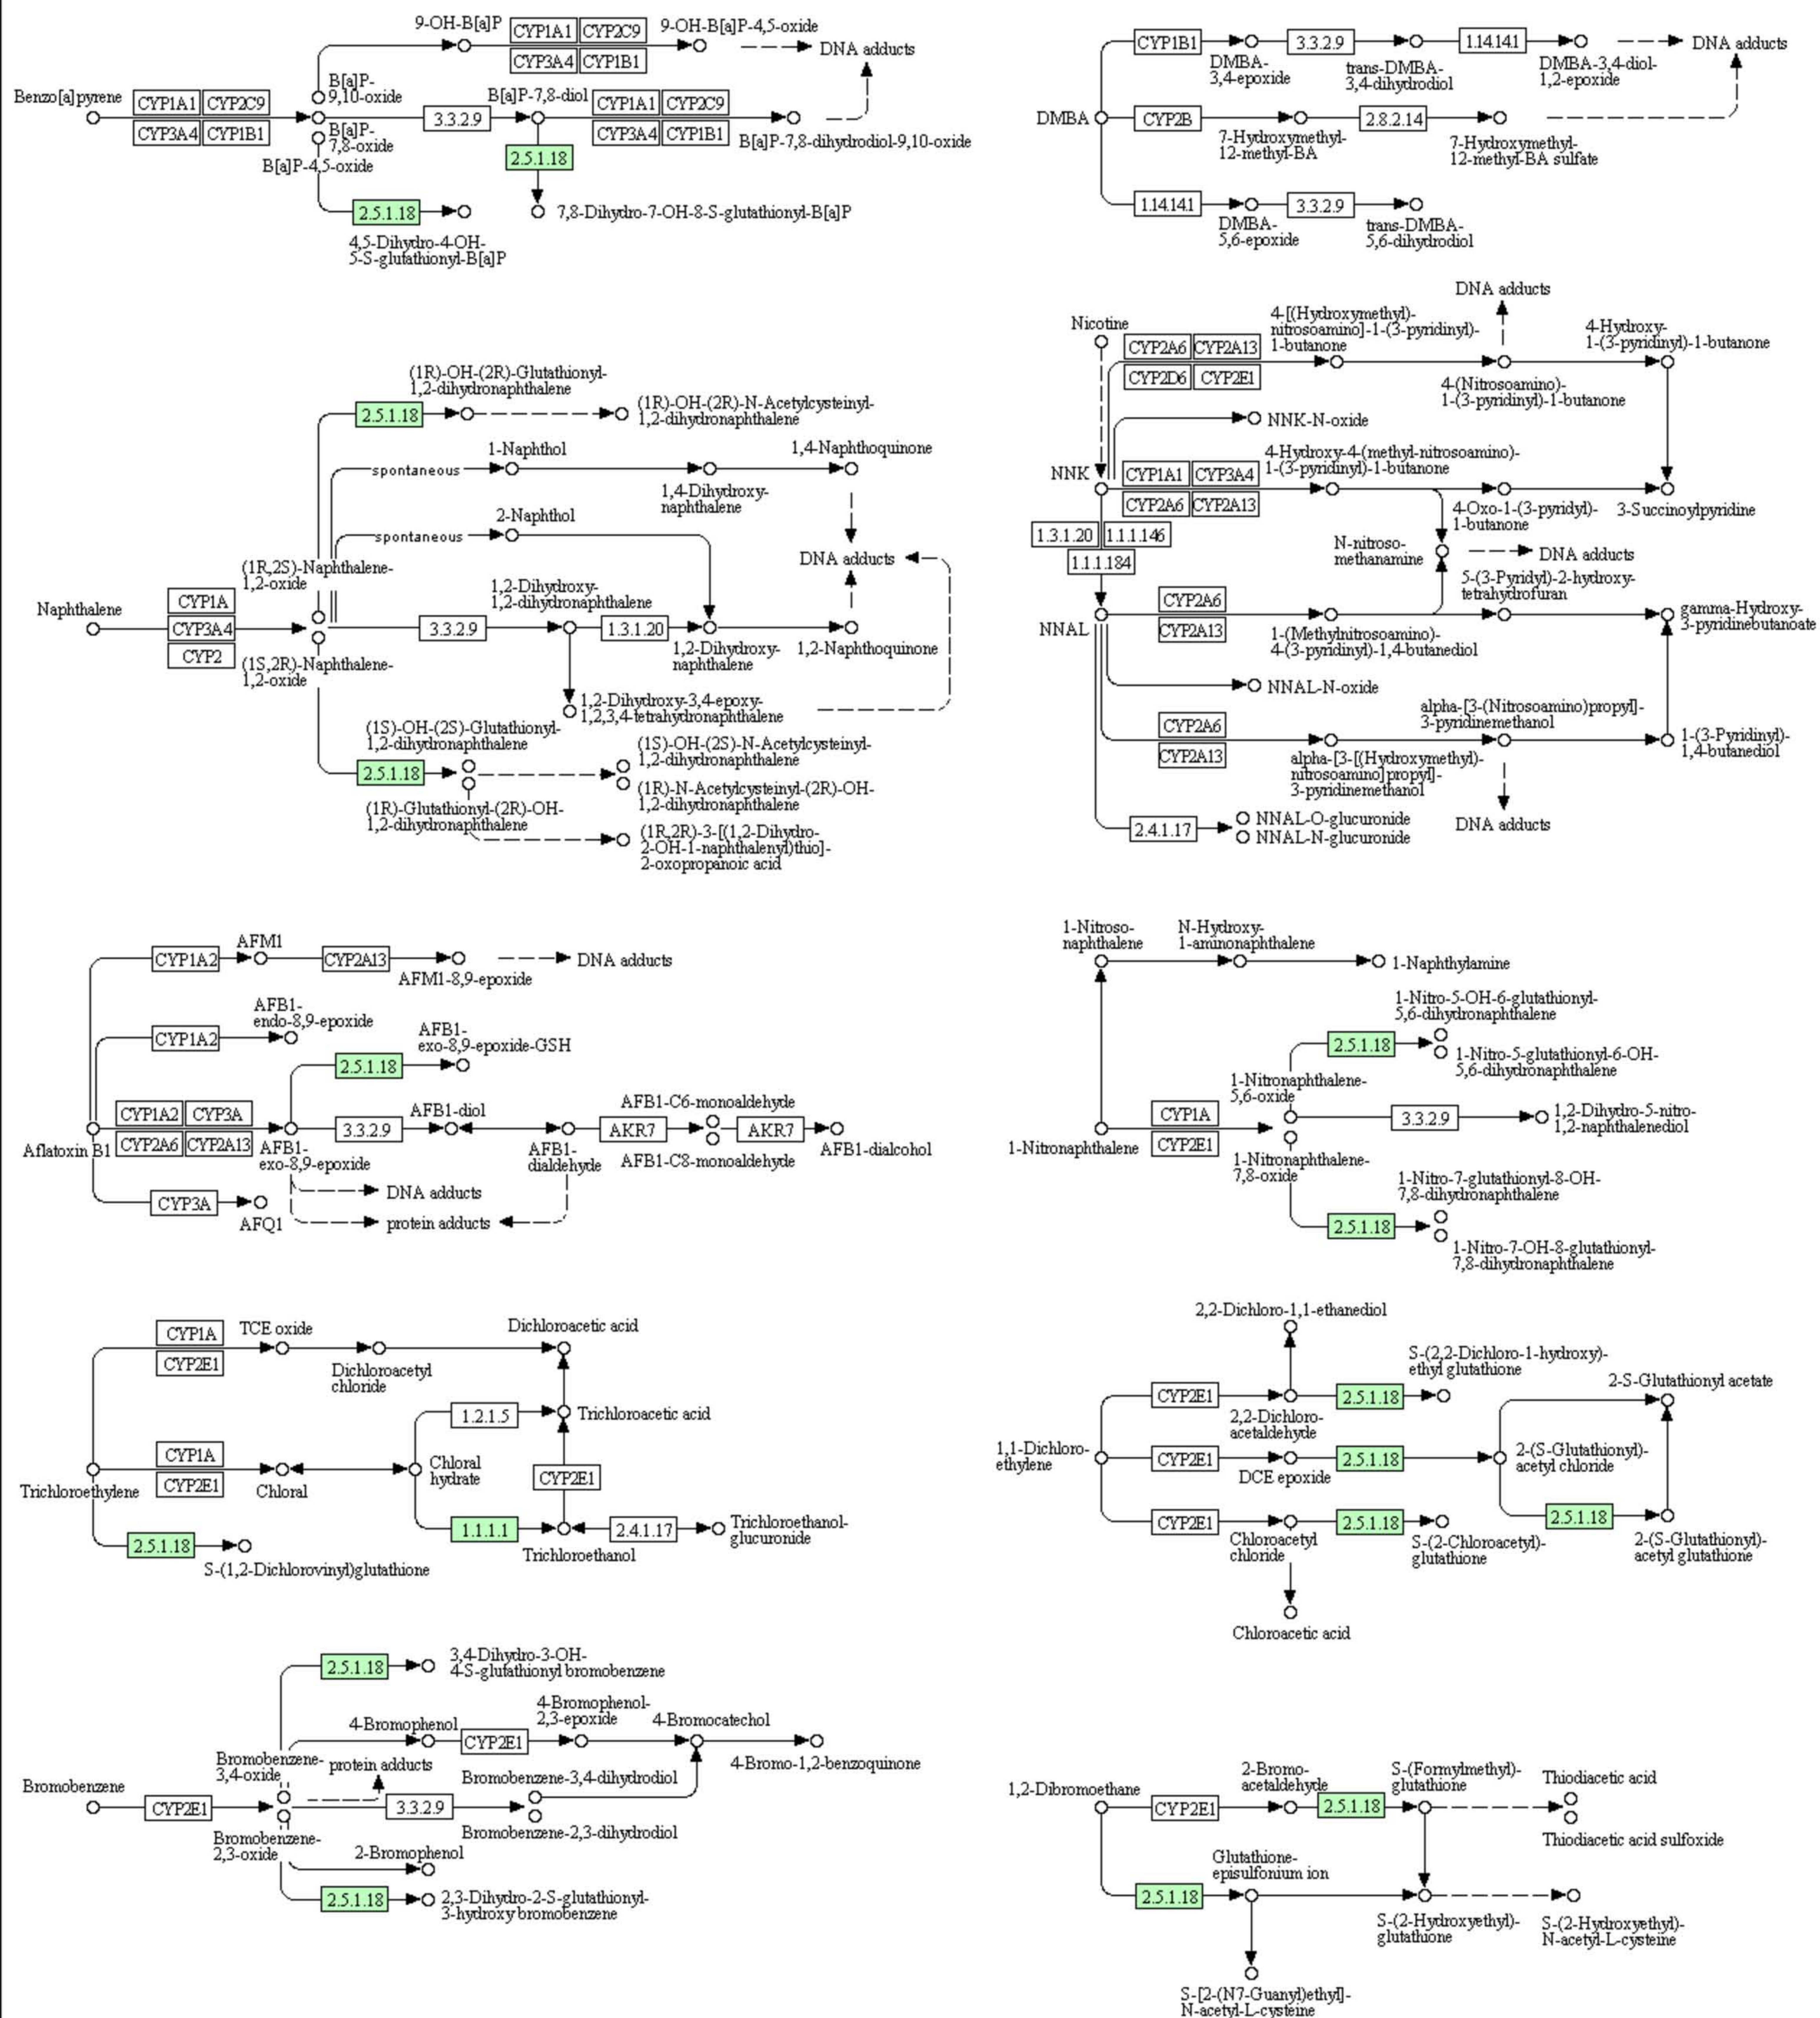



# METHANE METABOLISM

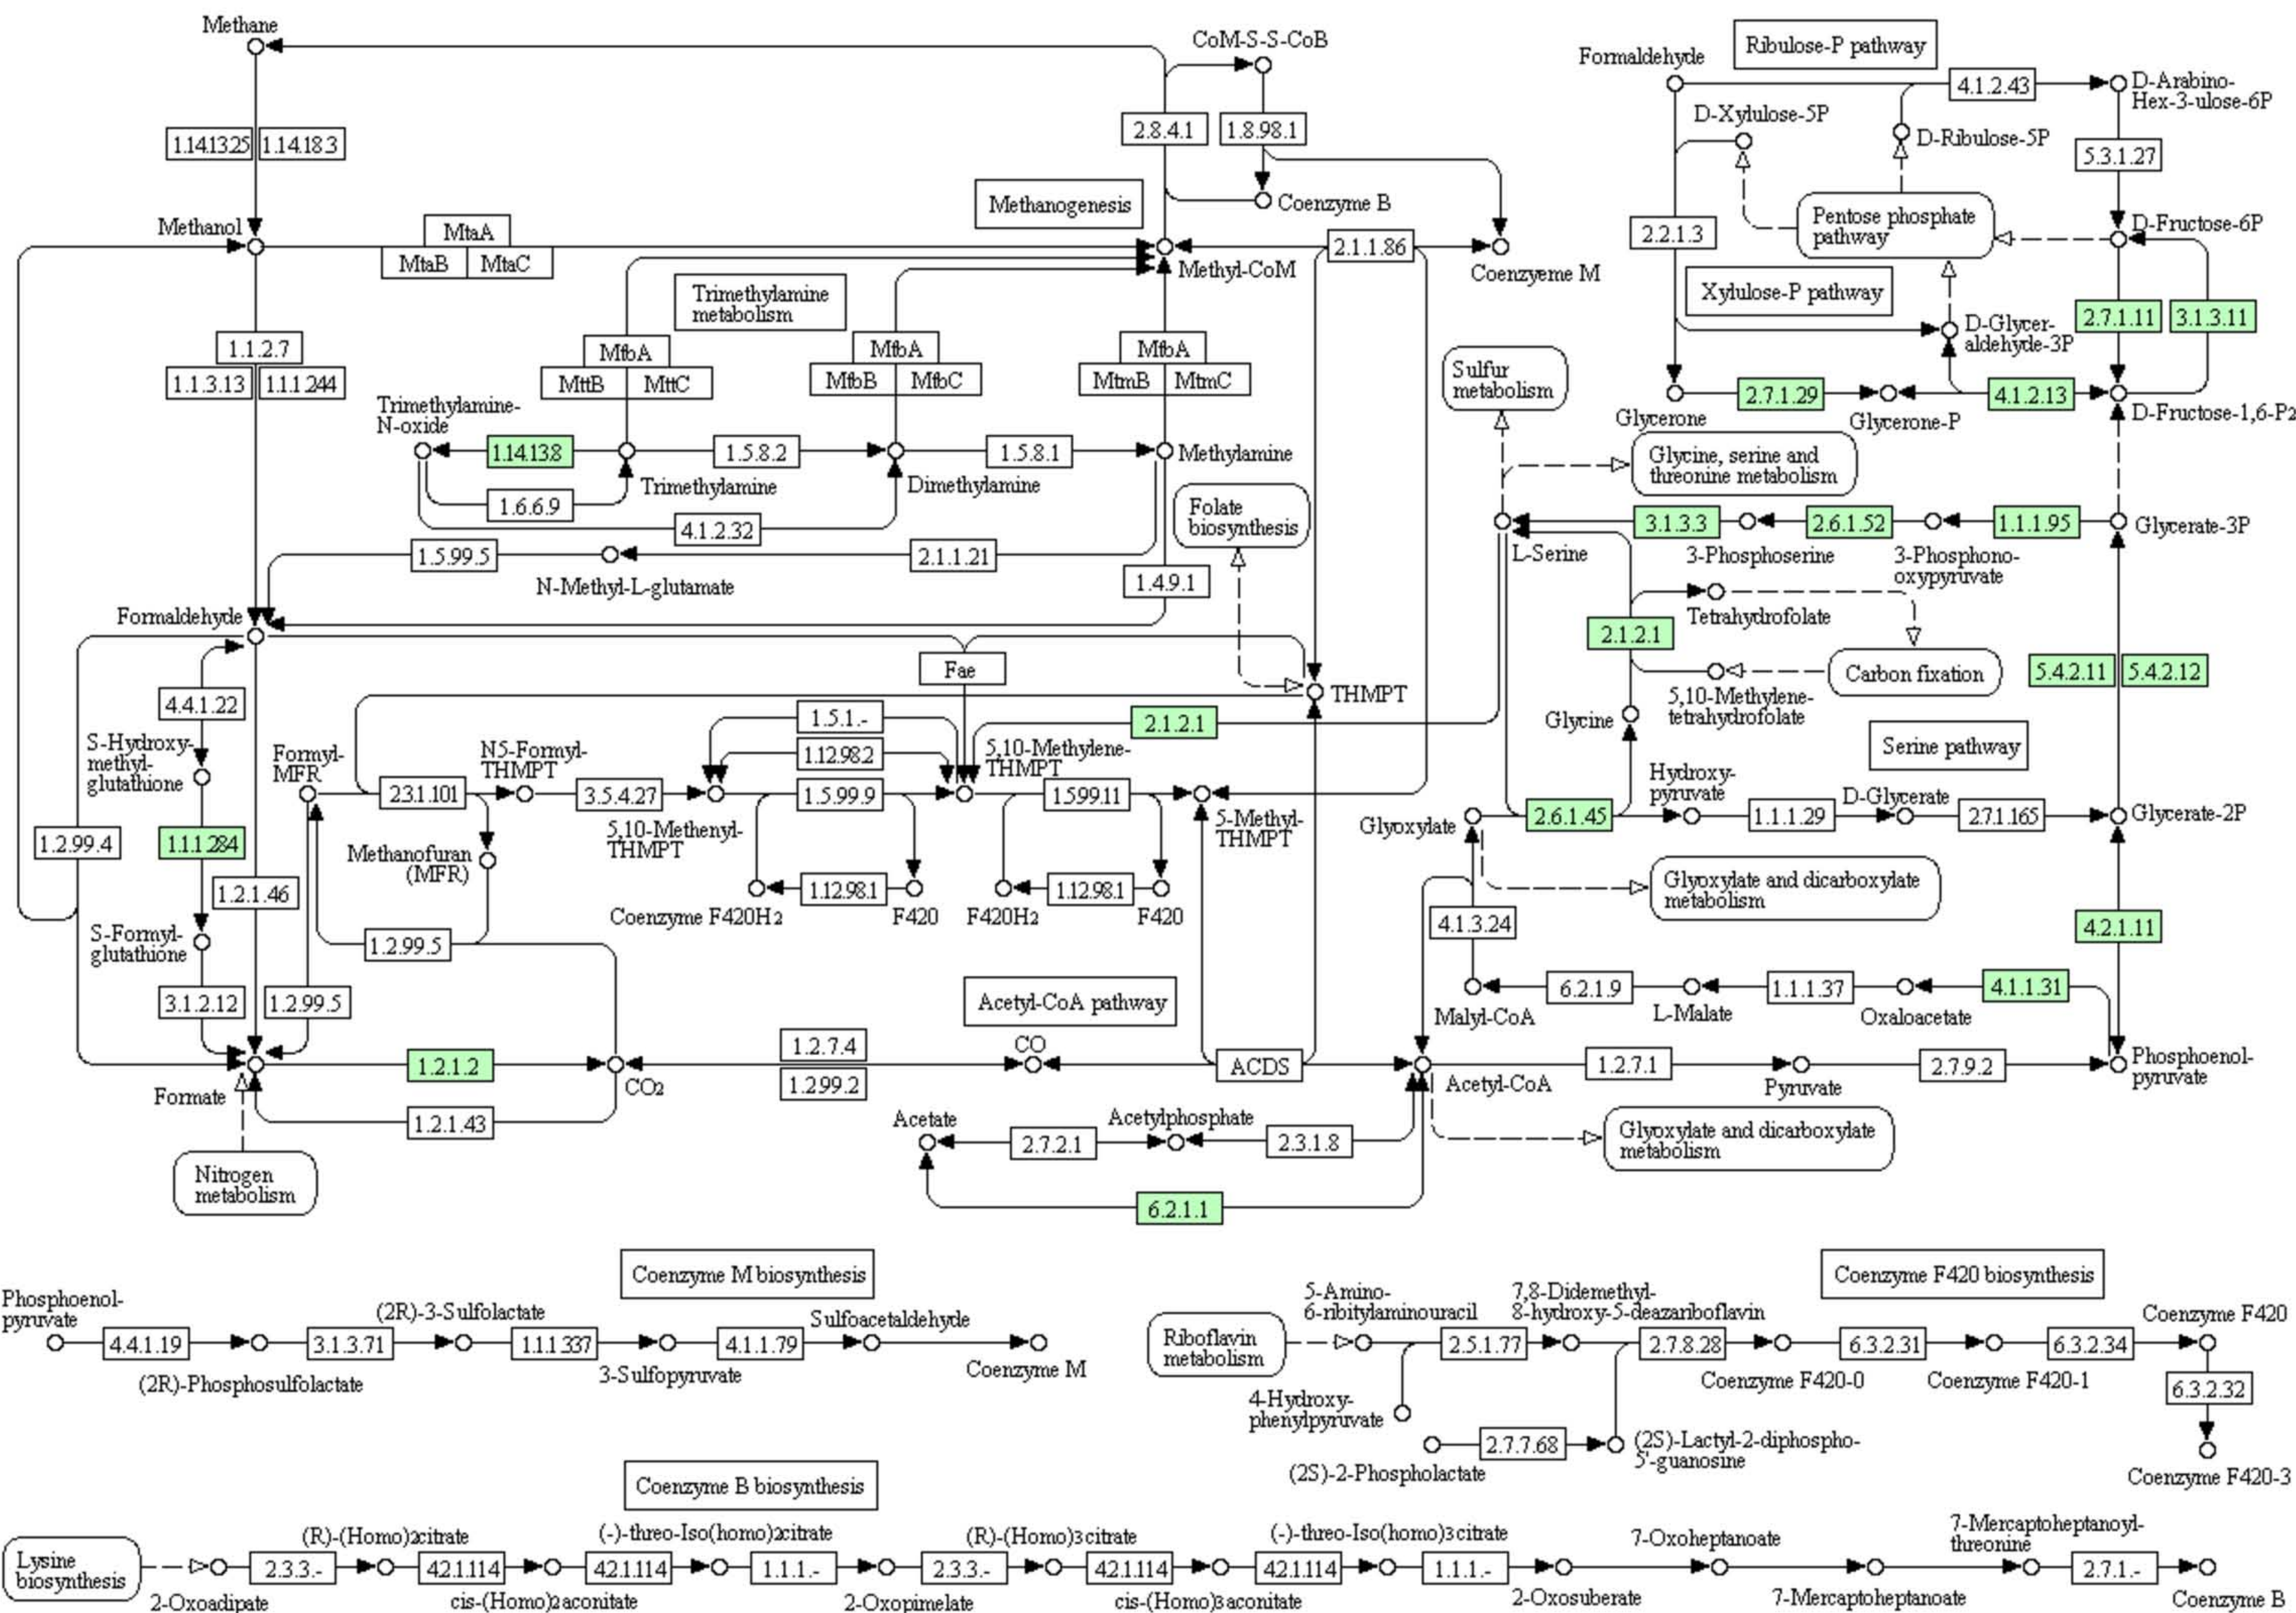



# MISMATCH REPAIR

## Prokaryotic type

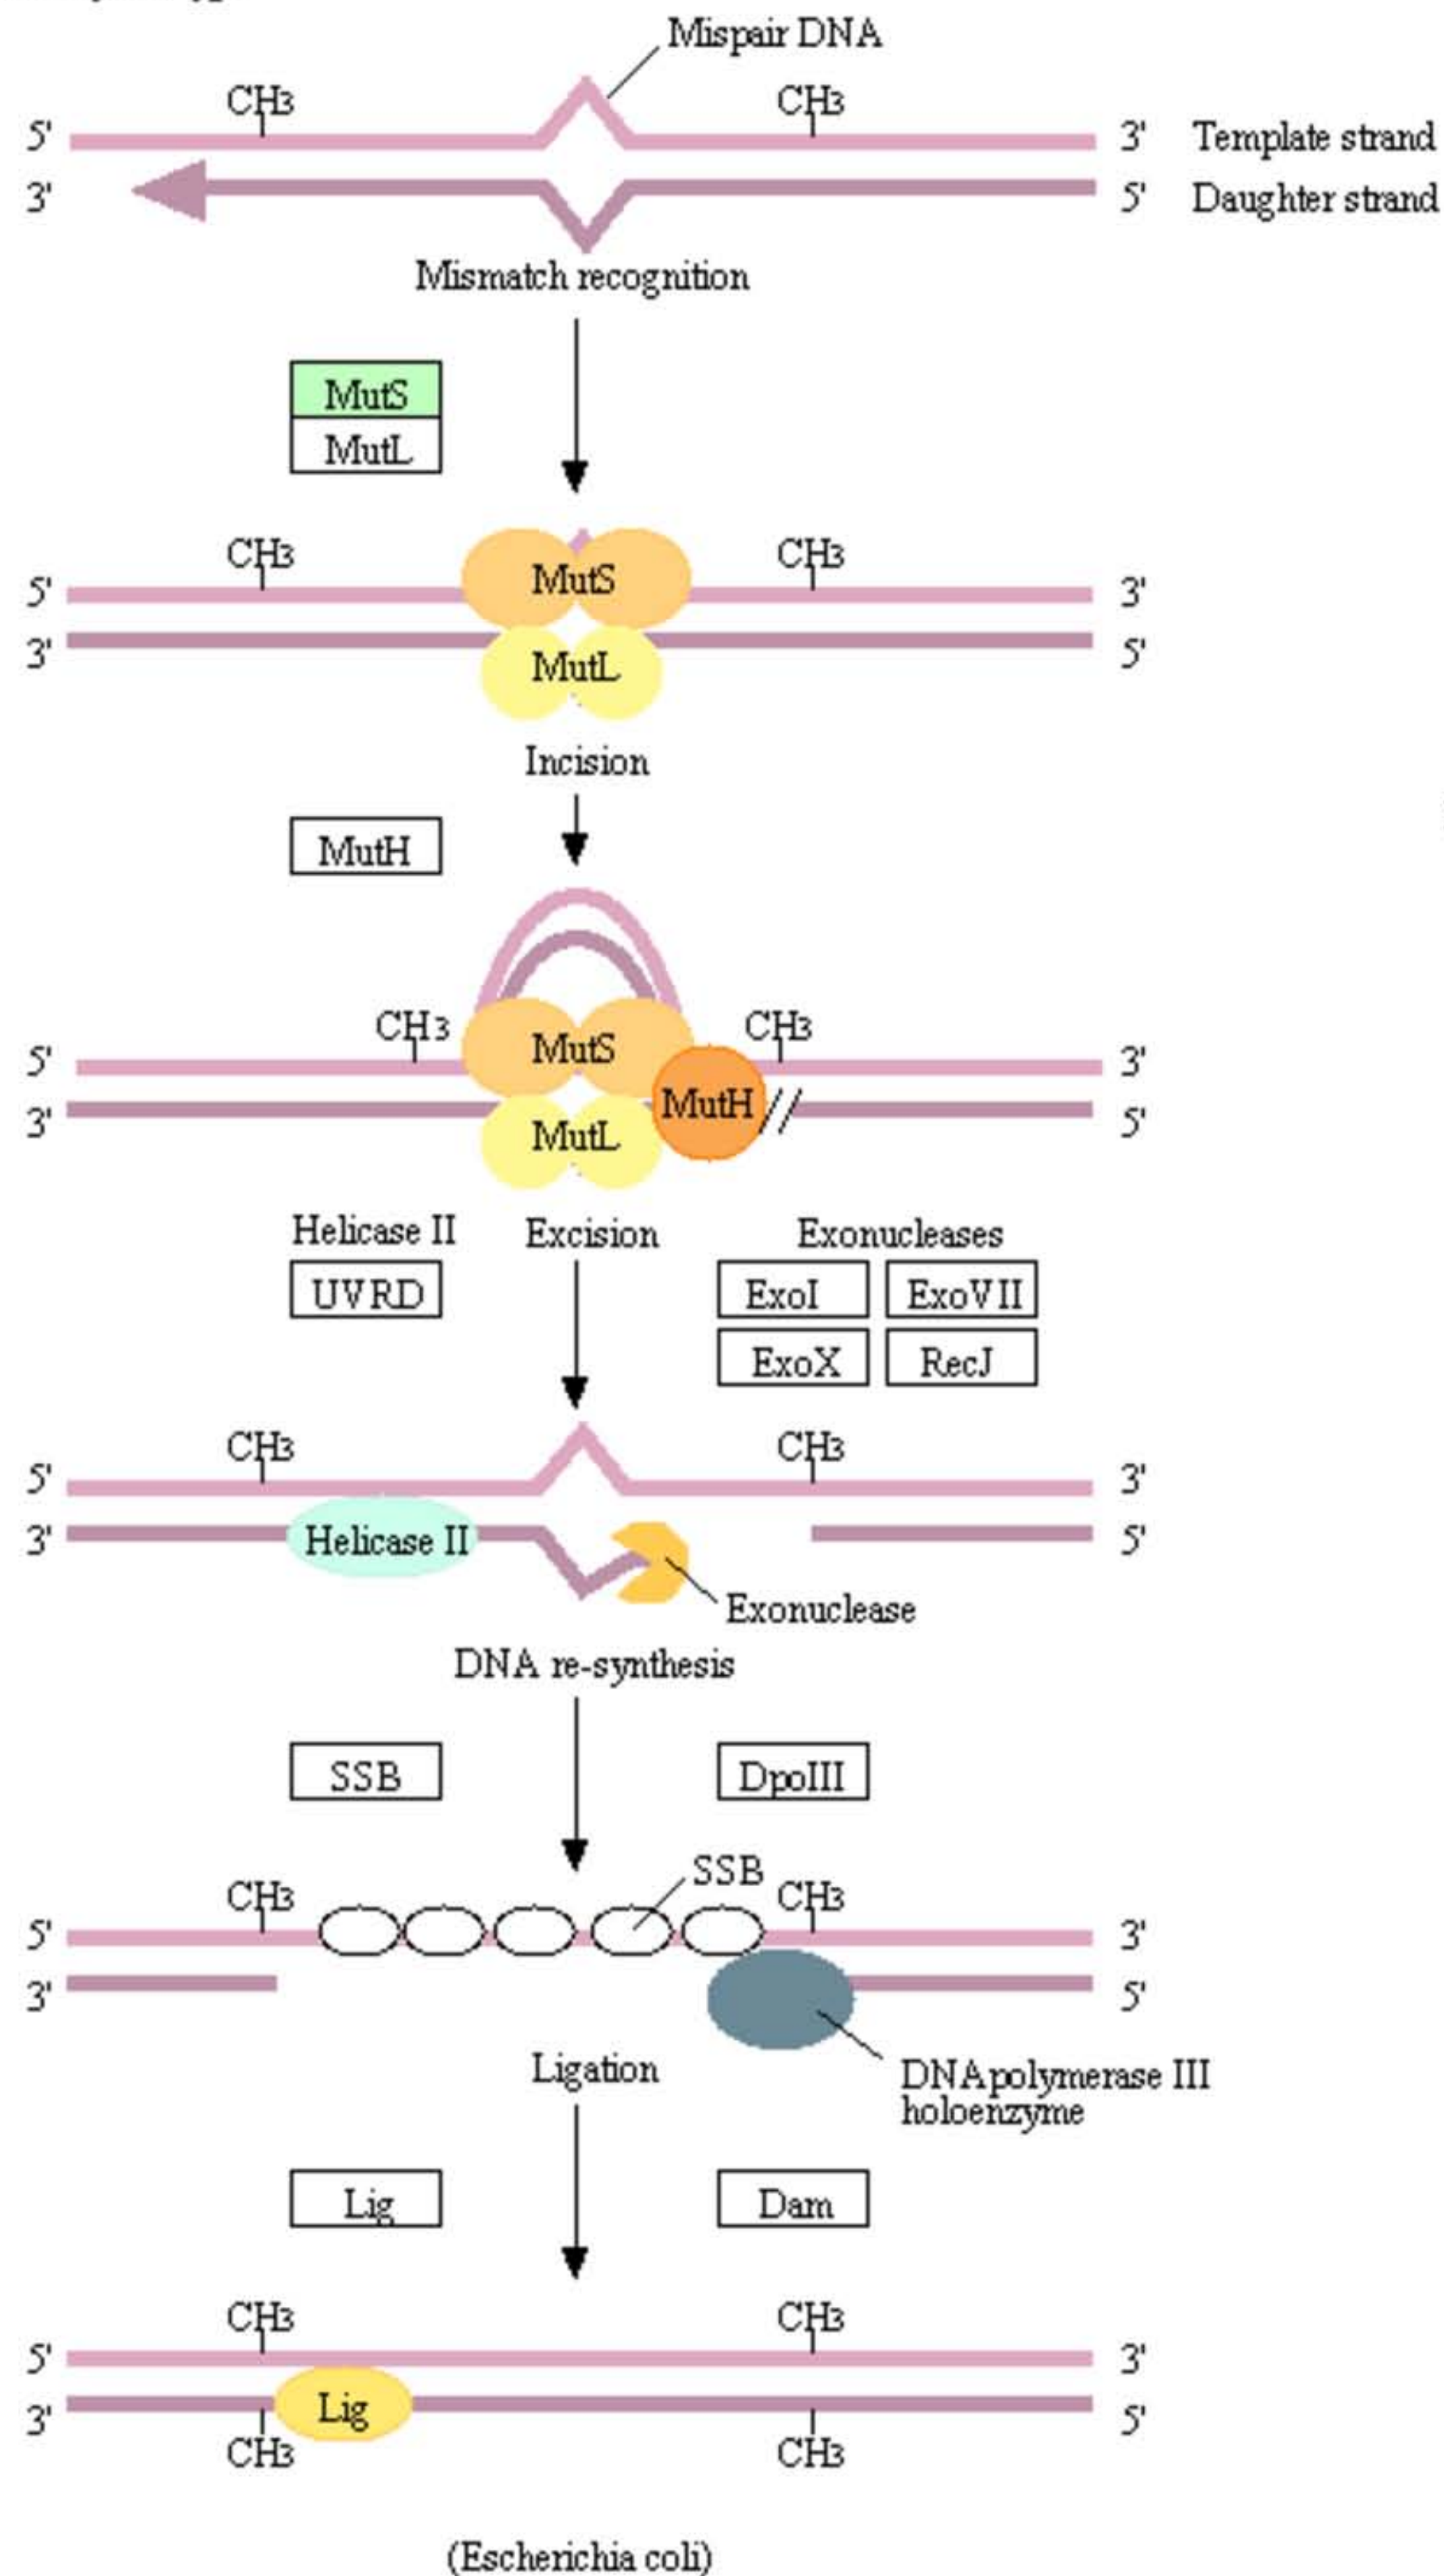

## Eukaryotic type

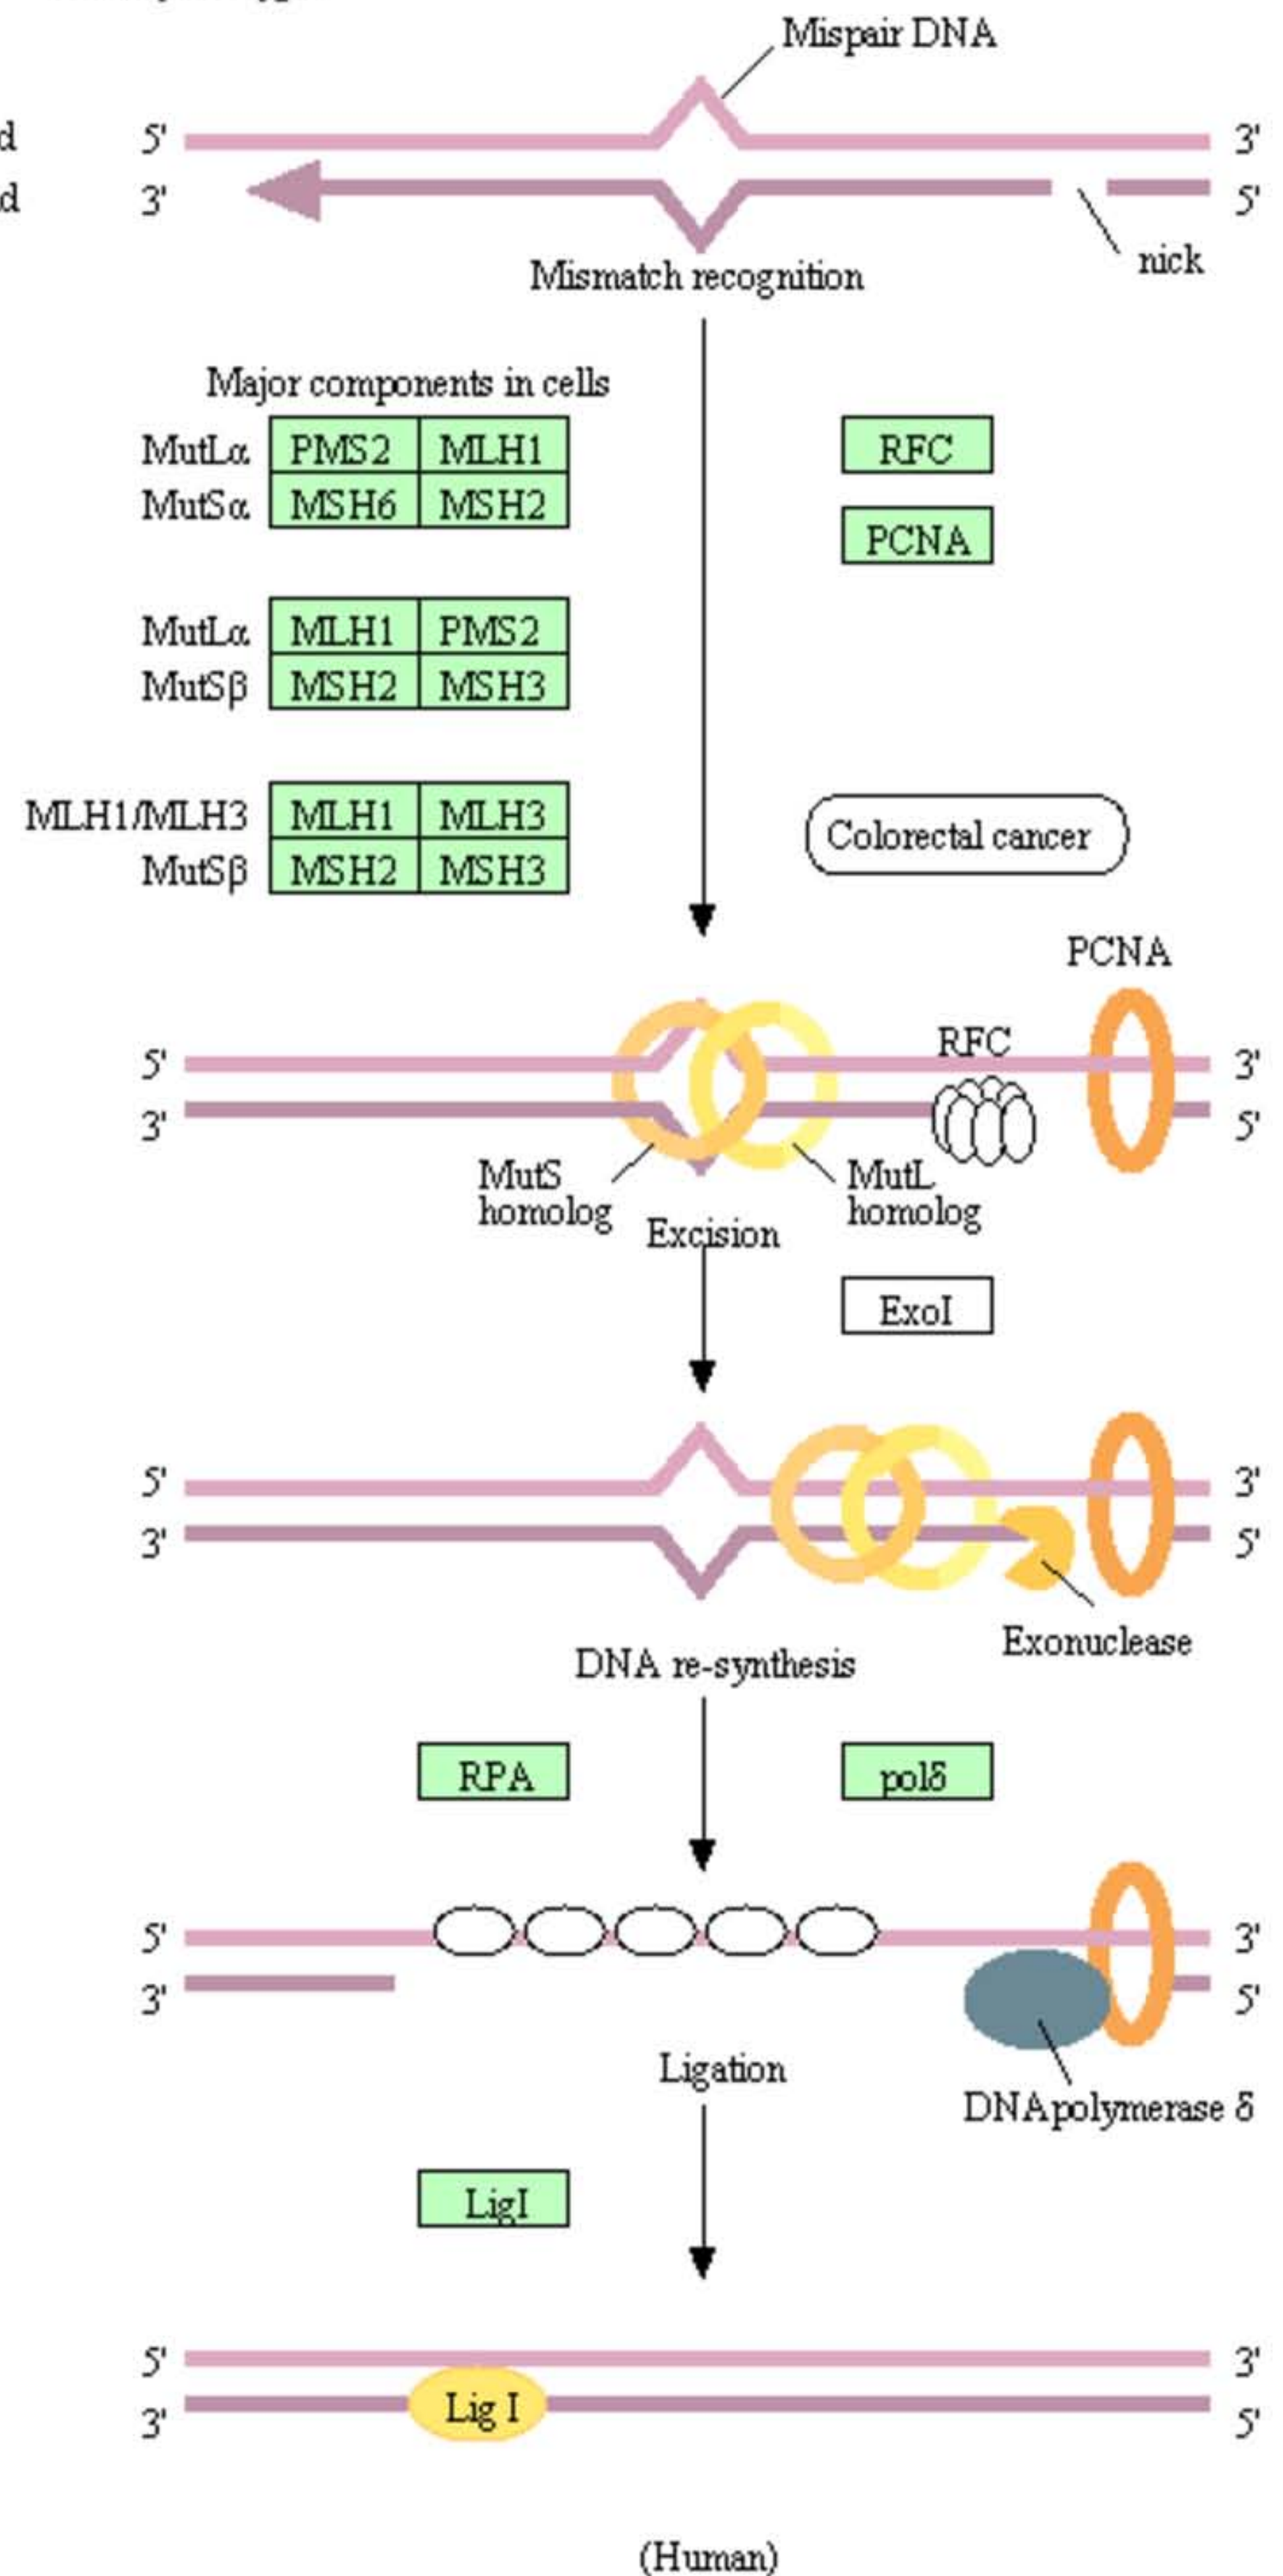



# MONOTERPENOID BIOSYNTHESIS

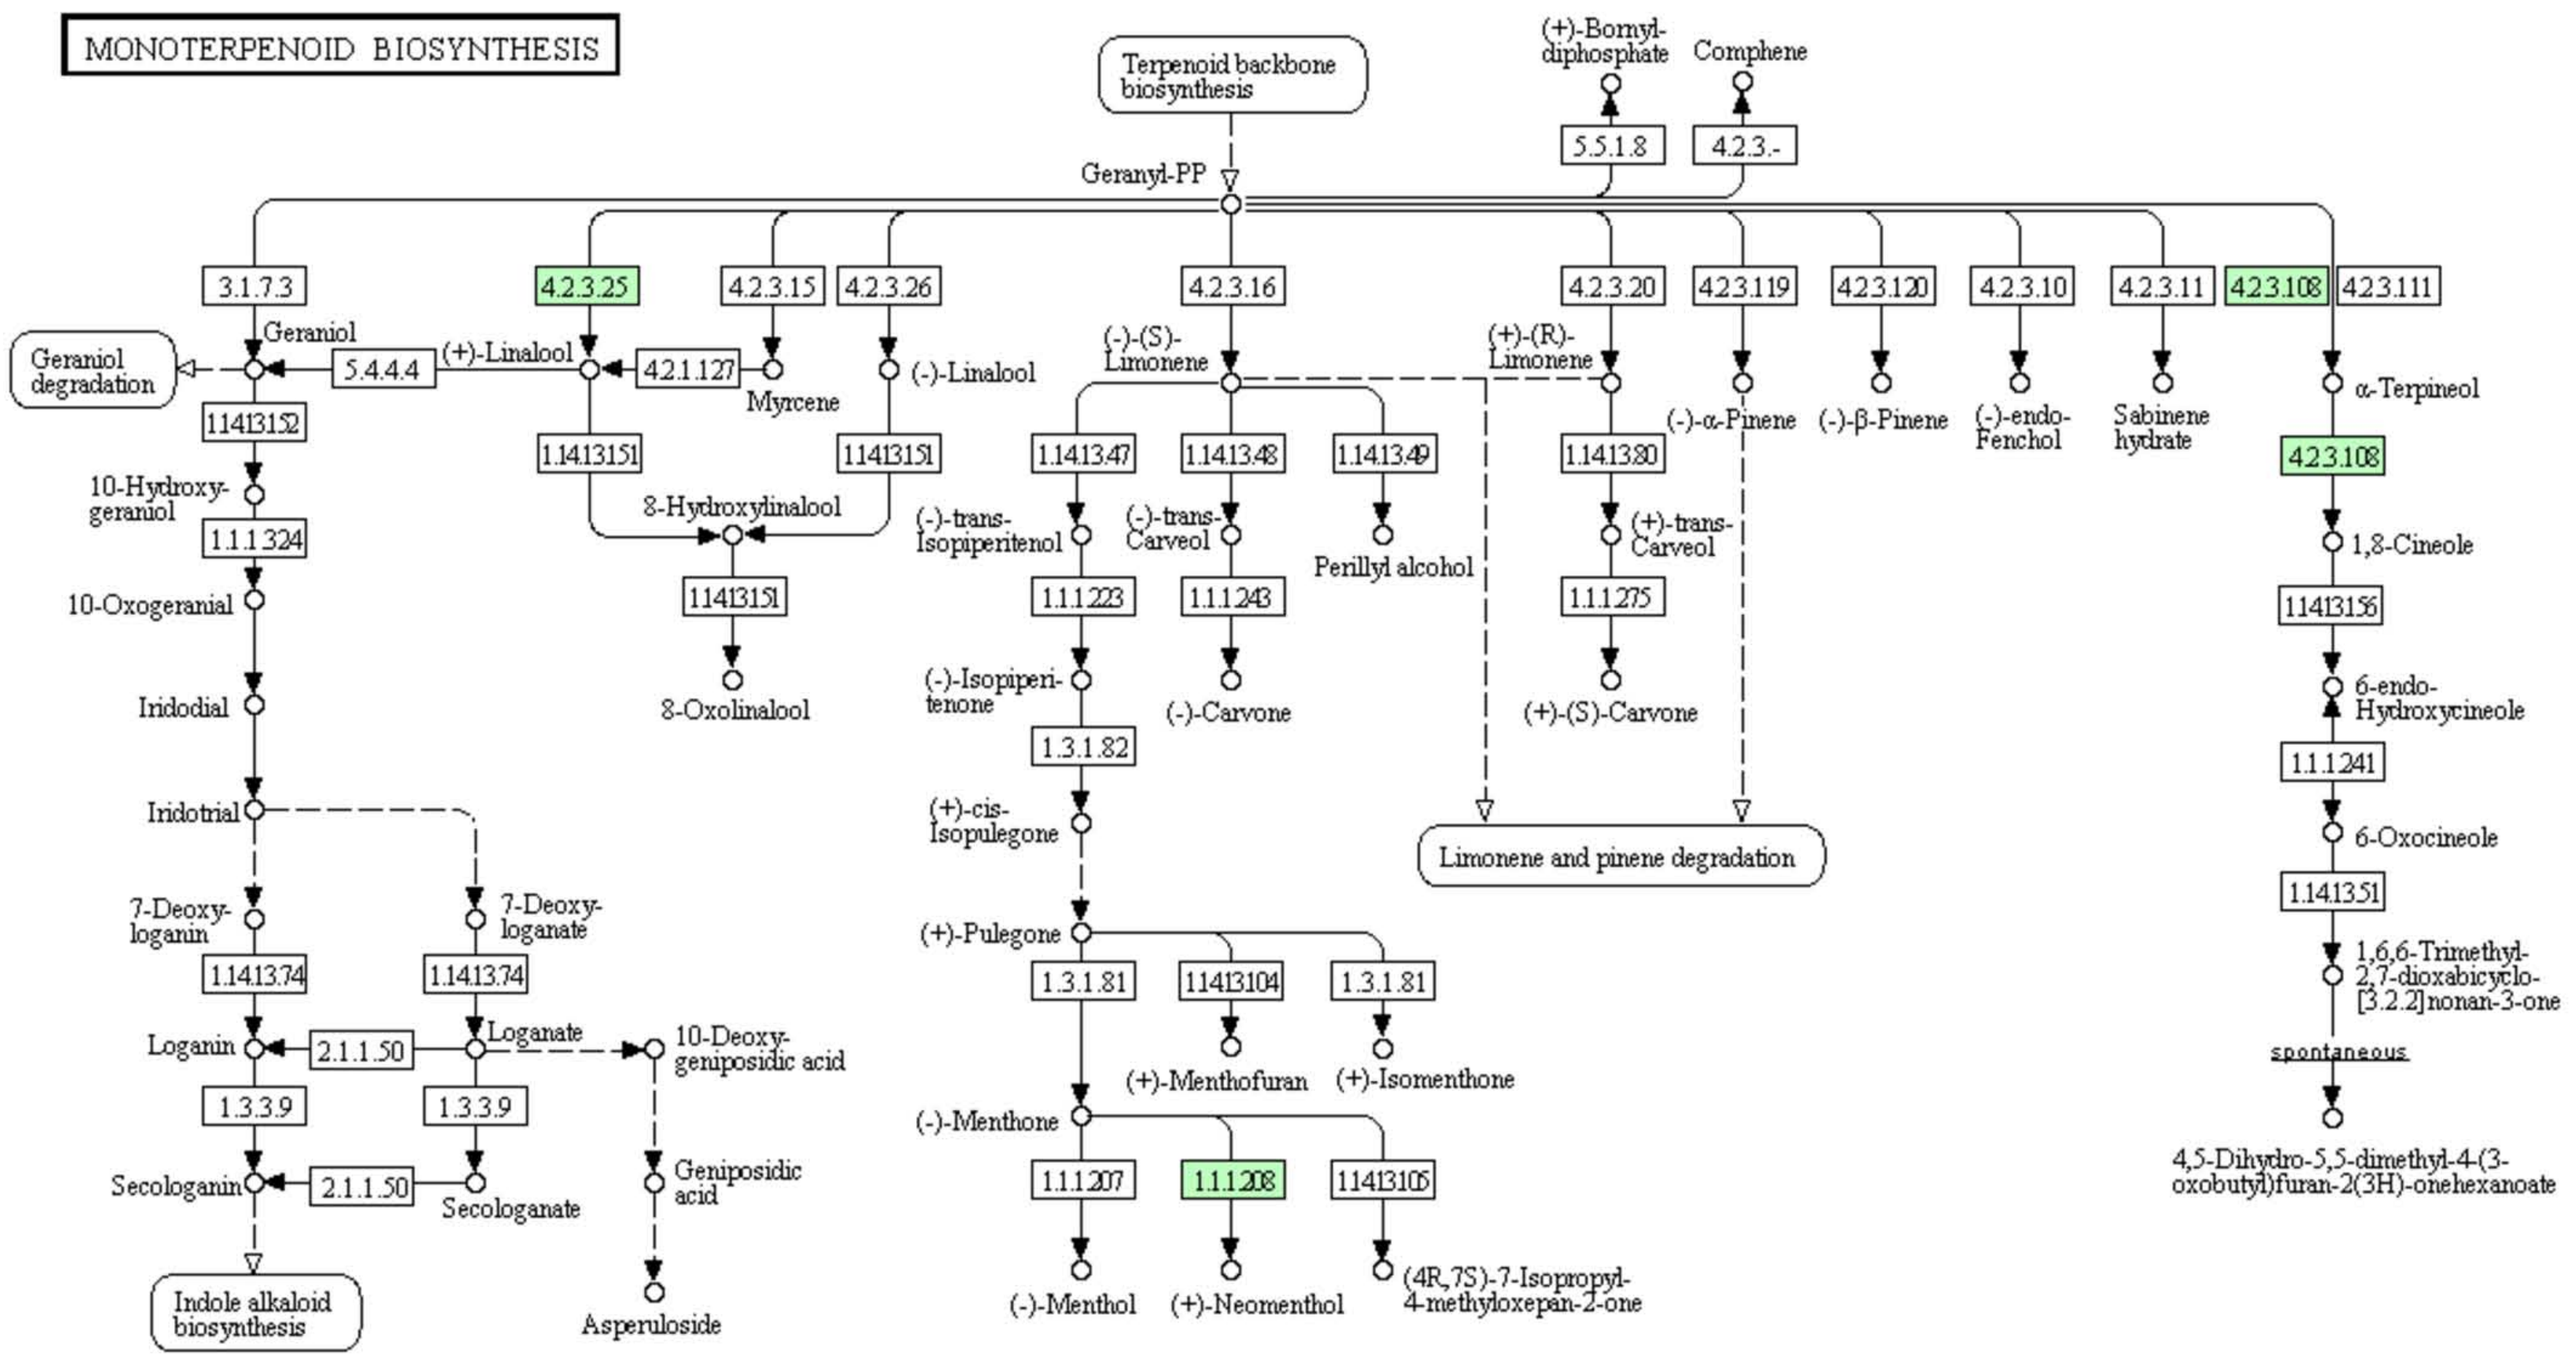



**mRNA SURVEILLANCE PATHWAY**

pre-mRNA RNA polymerase II

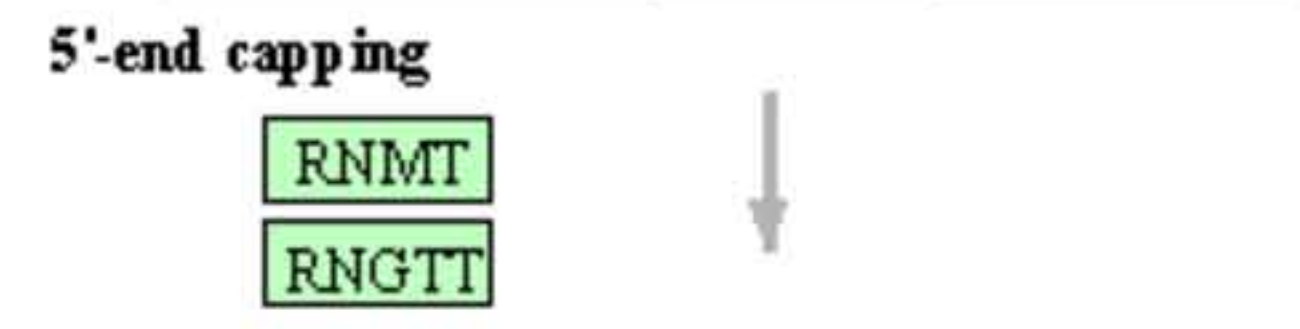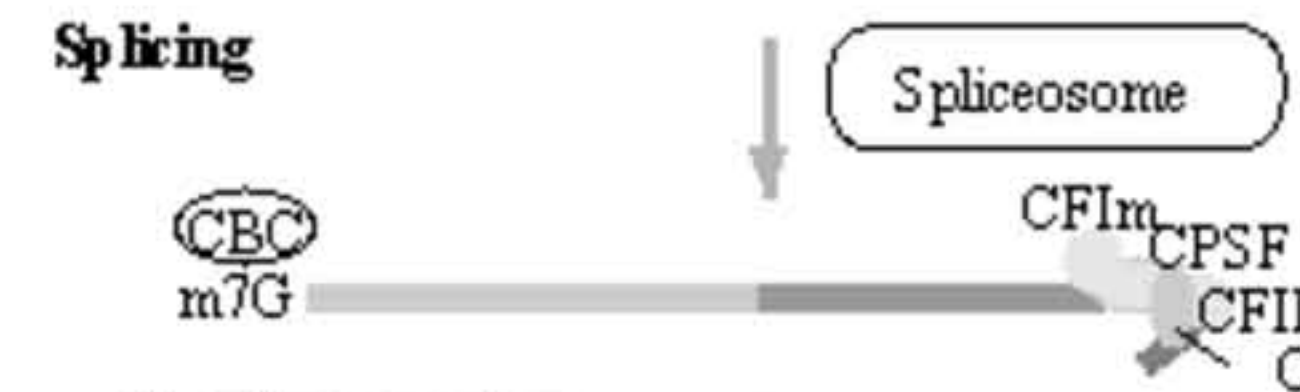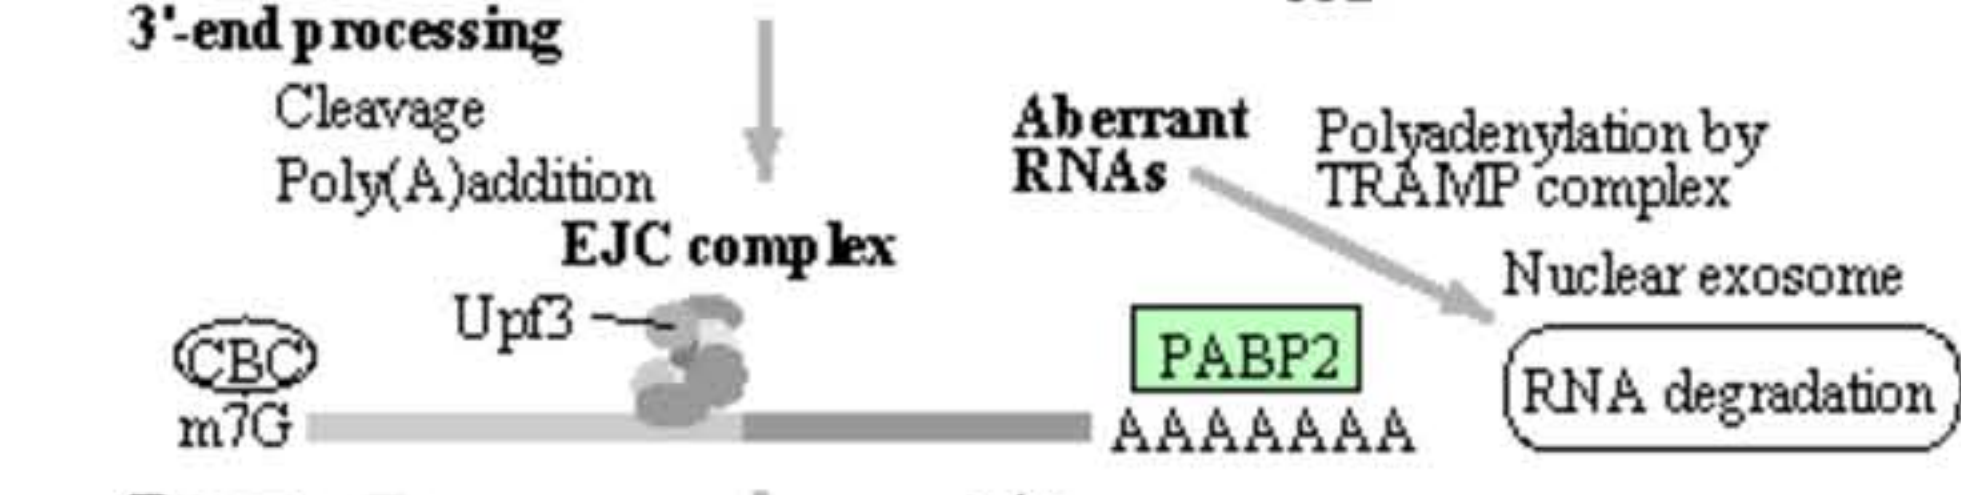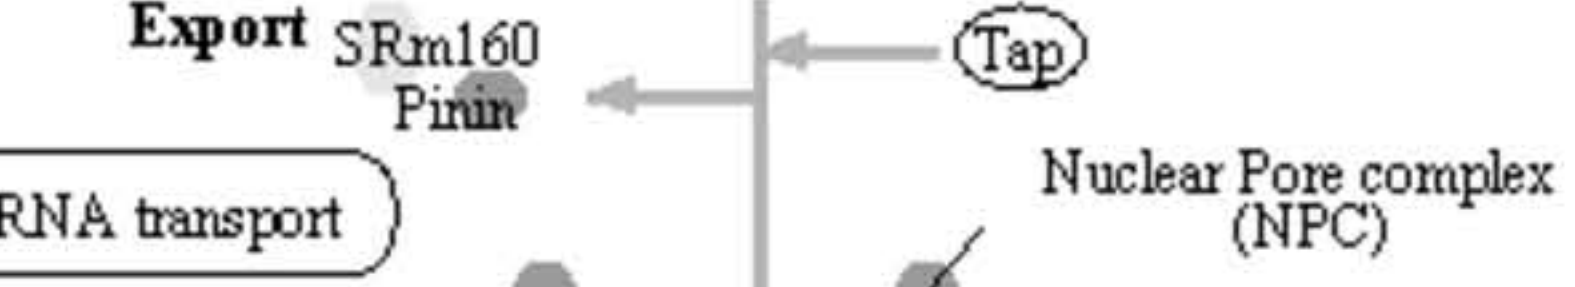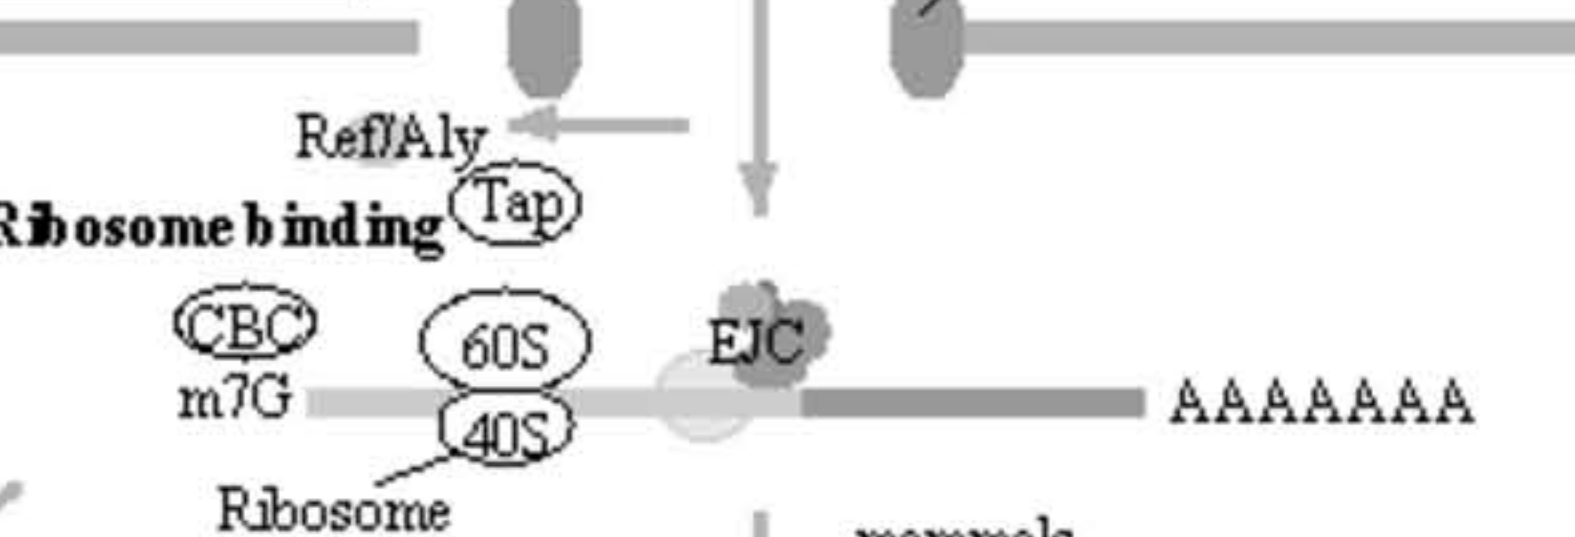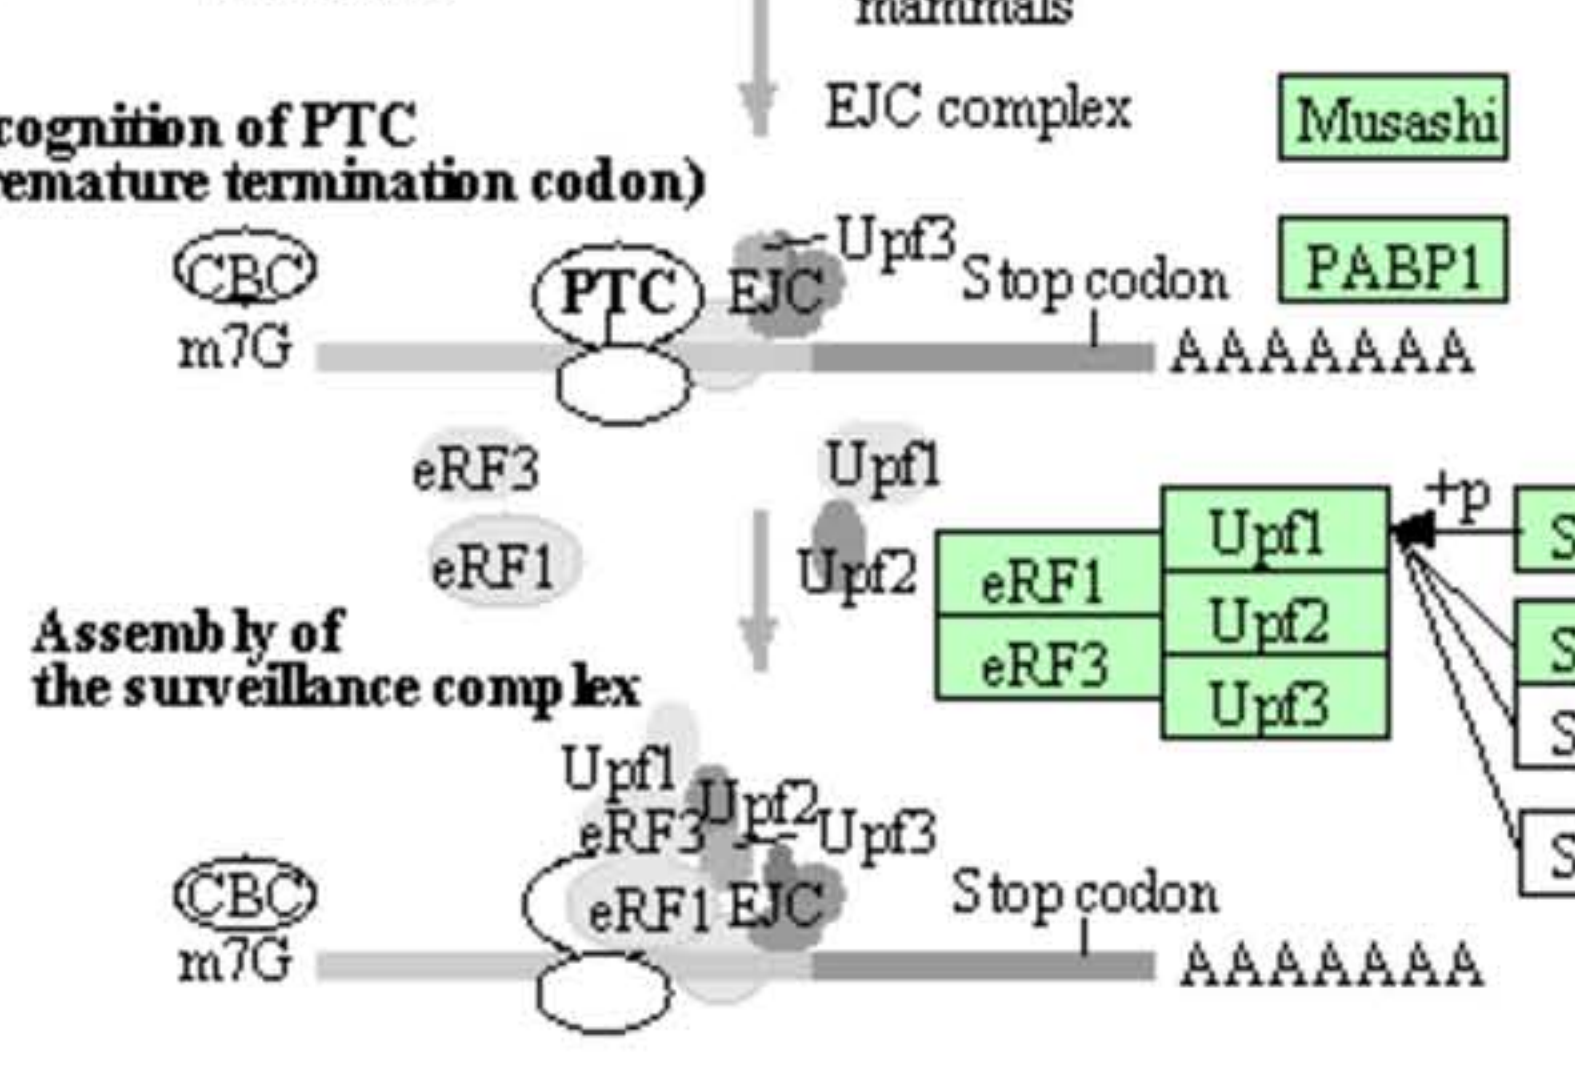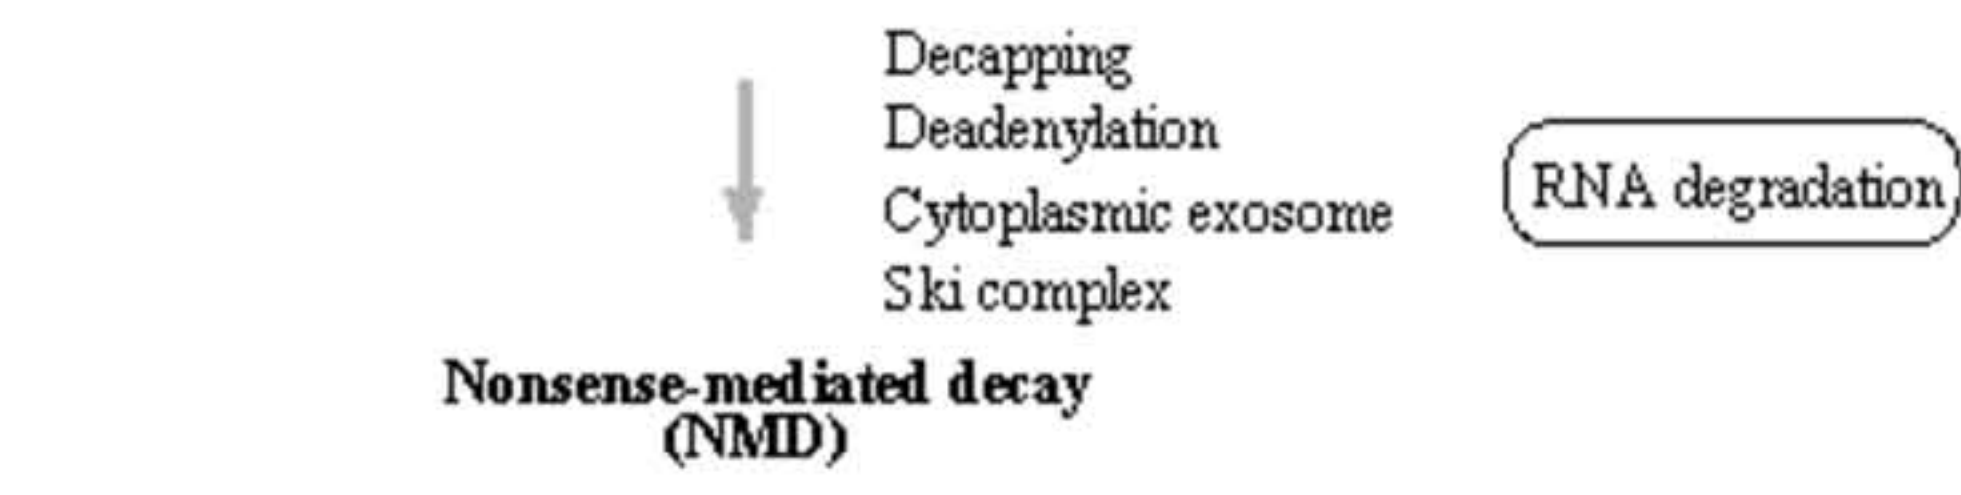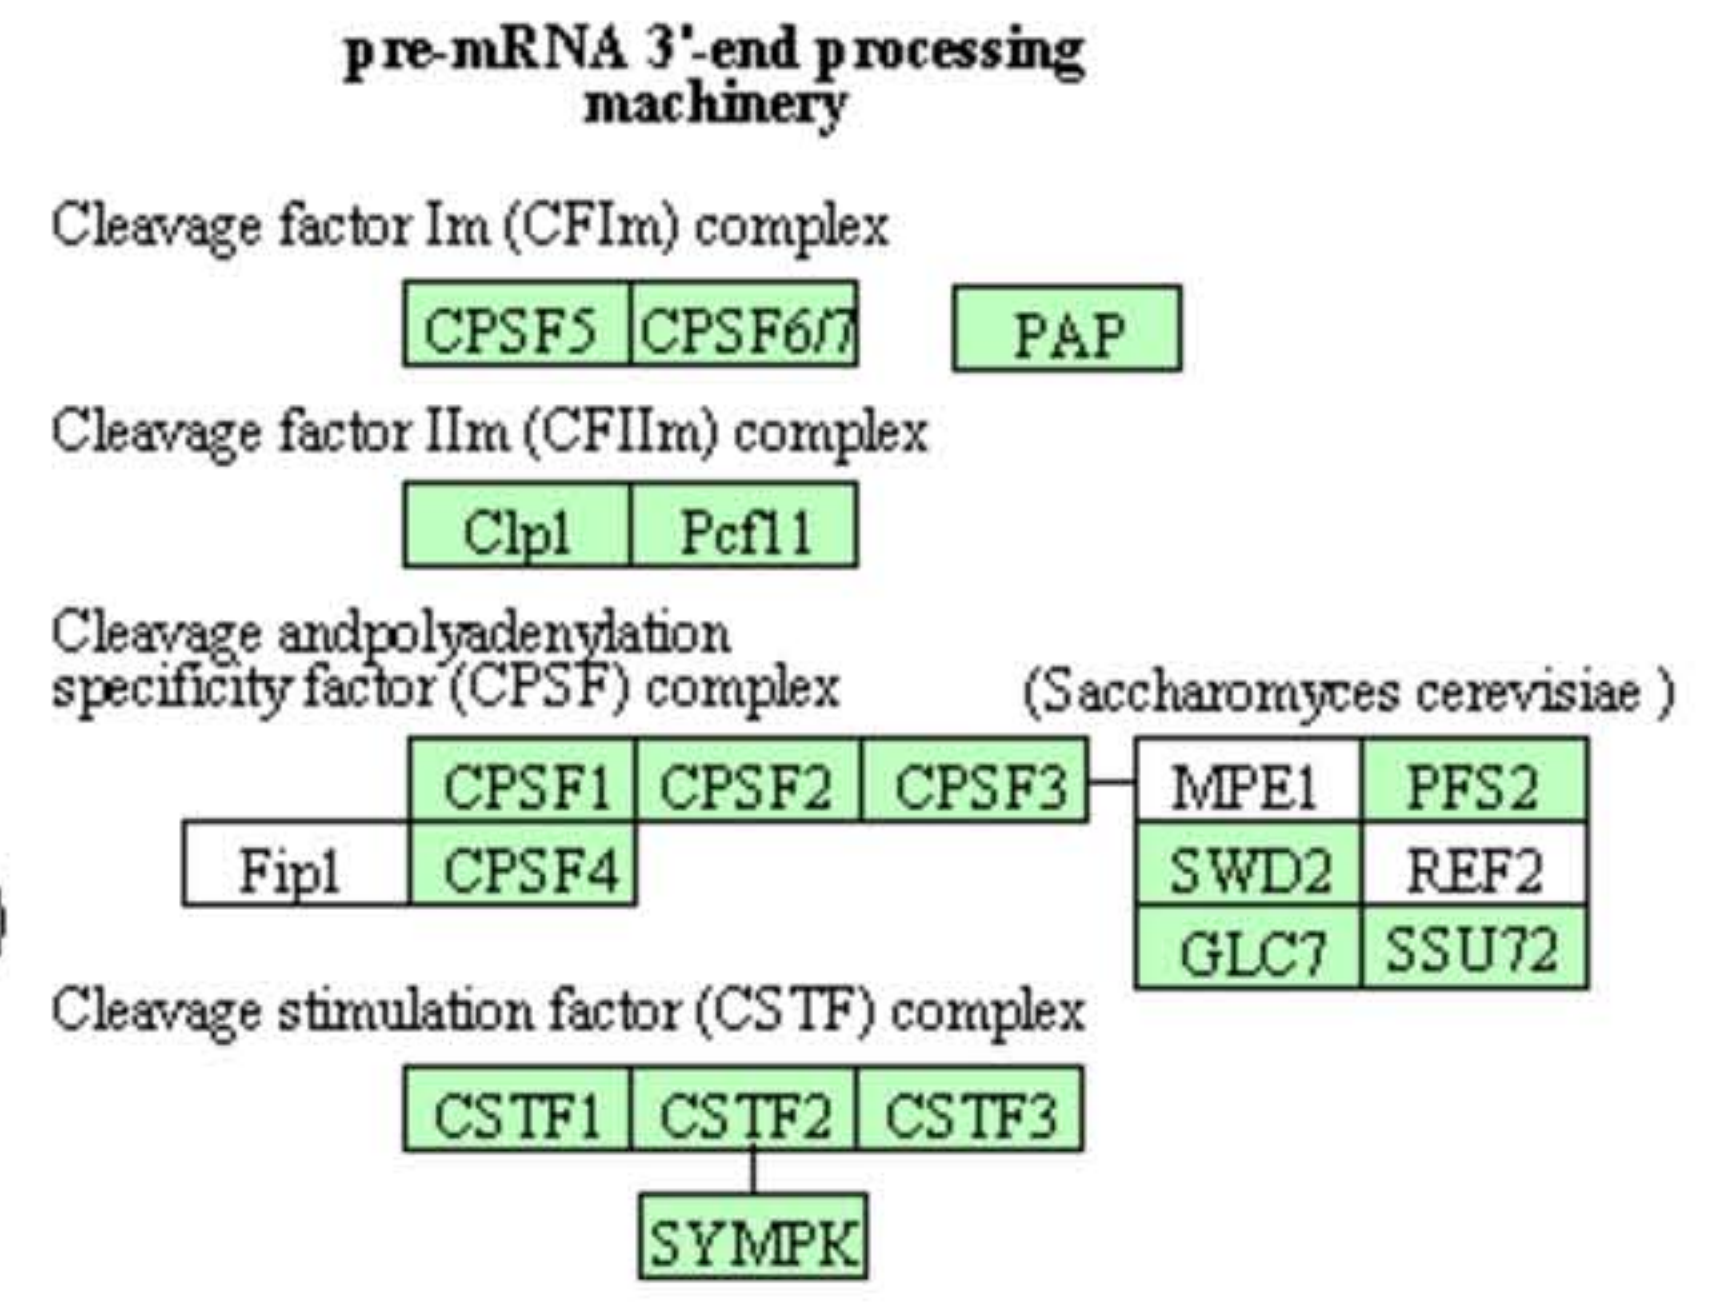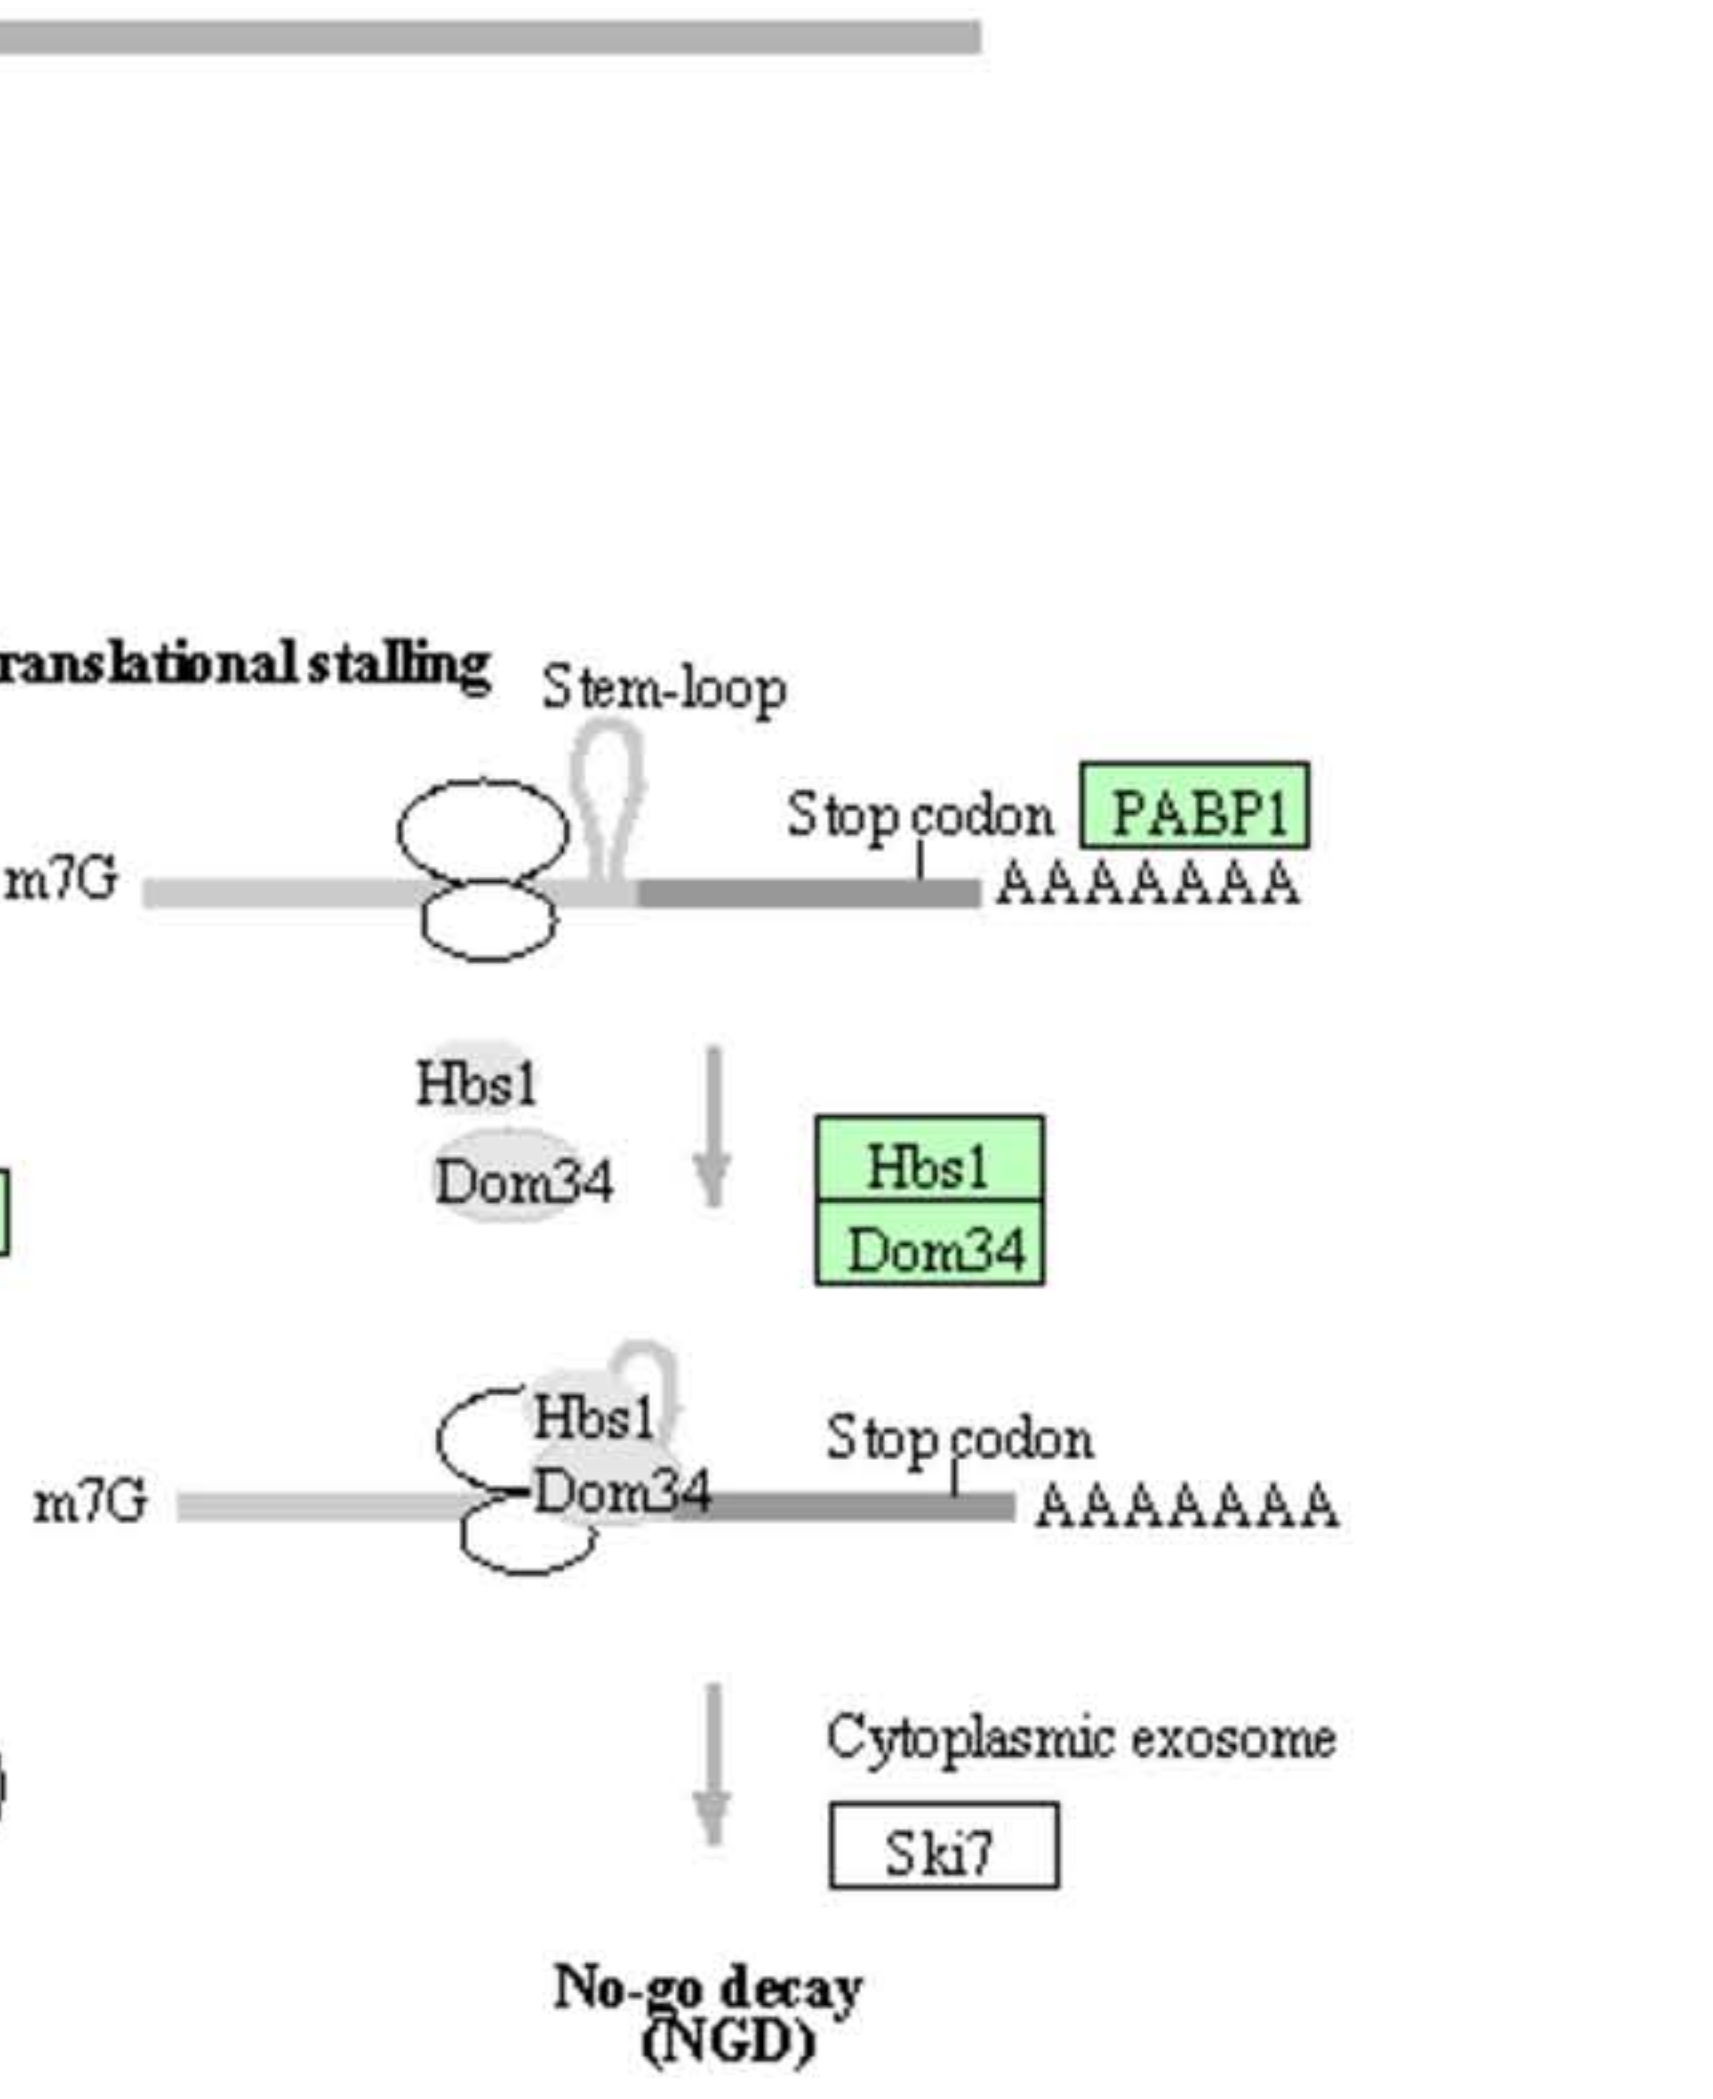

- Cap binding complex (CBC)**  
CBP80  
CBP20
- Exon-junction complex (EJC)**  
Upf3 ACIN1  
Y14 MLN51 SAP18 RNPS1  
MAGOY EIF4A3 Pirin Ref/Aly
- Transiently interacting factors**  
Tap UAP56 SRm160  
p15 PYM

**Nucleus**  
**Cytoplasm**

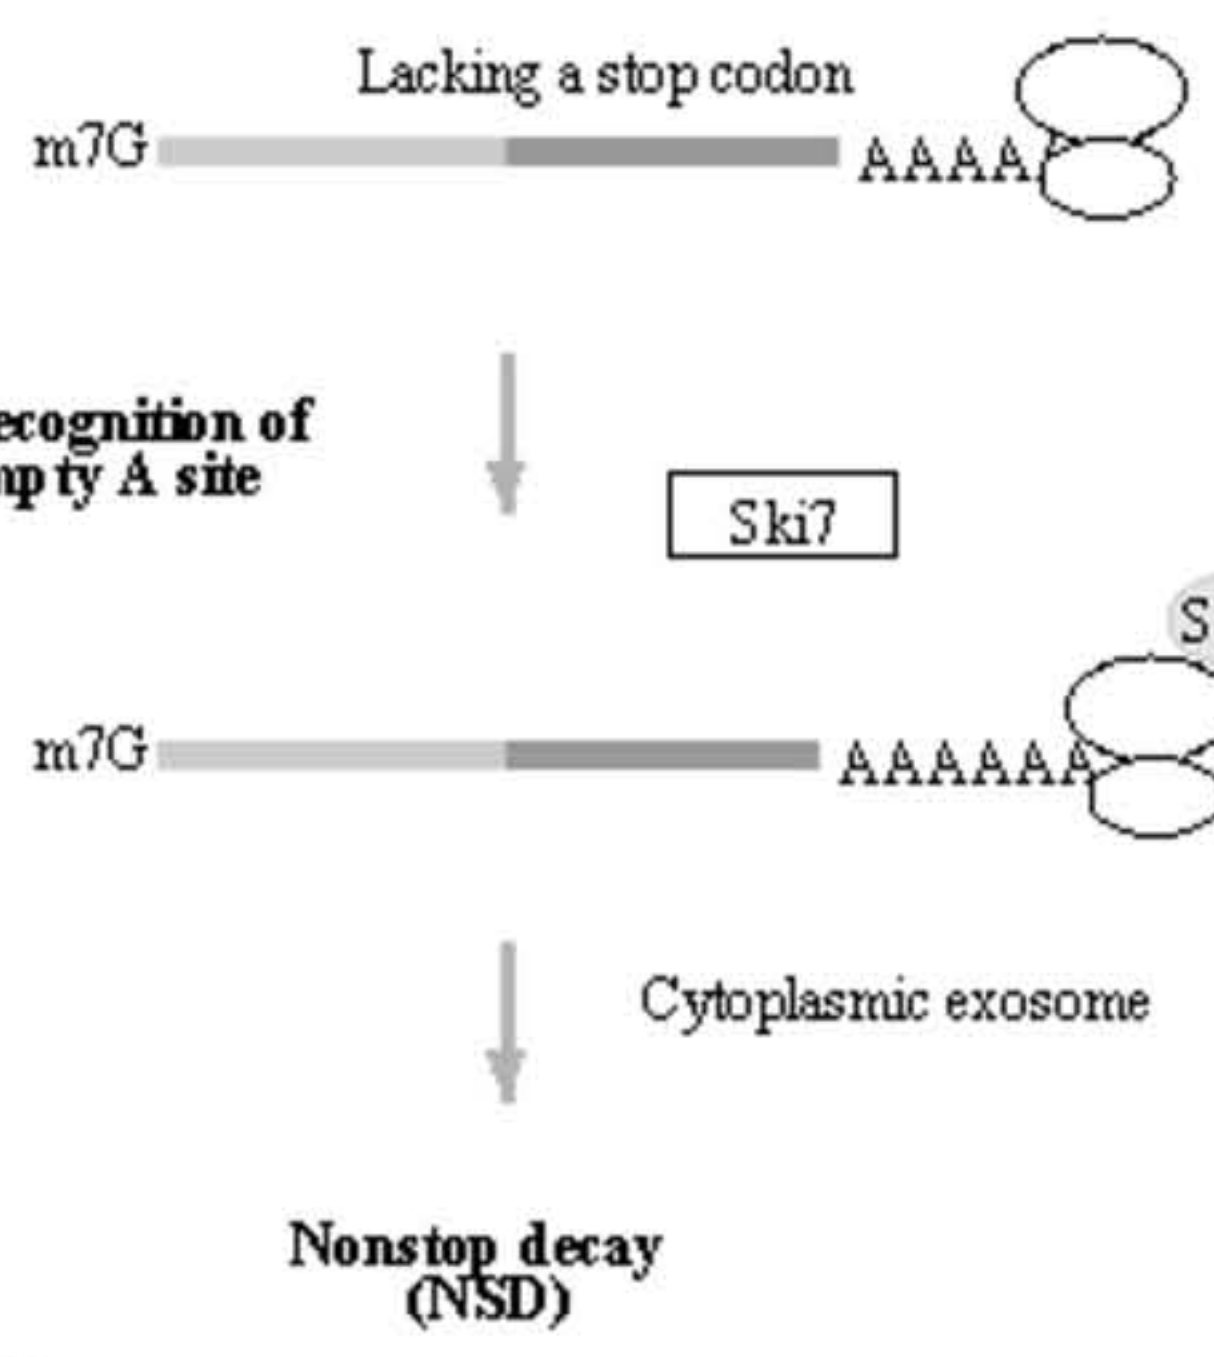

**Nonsense-mediated decay (NMD)**

**No-go decay (NGD)**



# mTOR SIGNALING PATHWAY

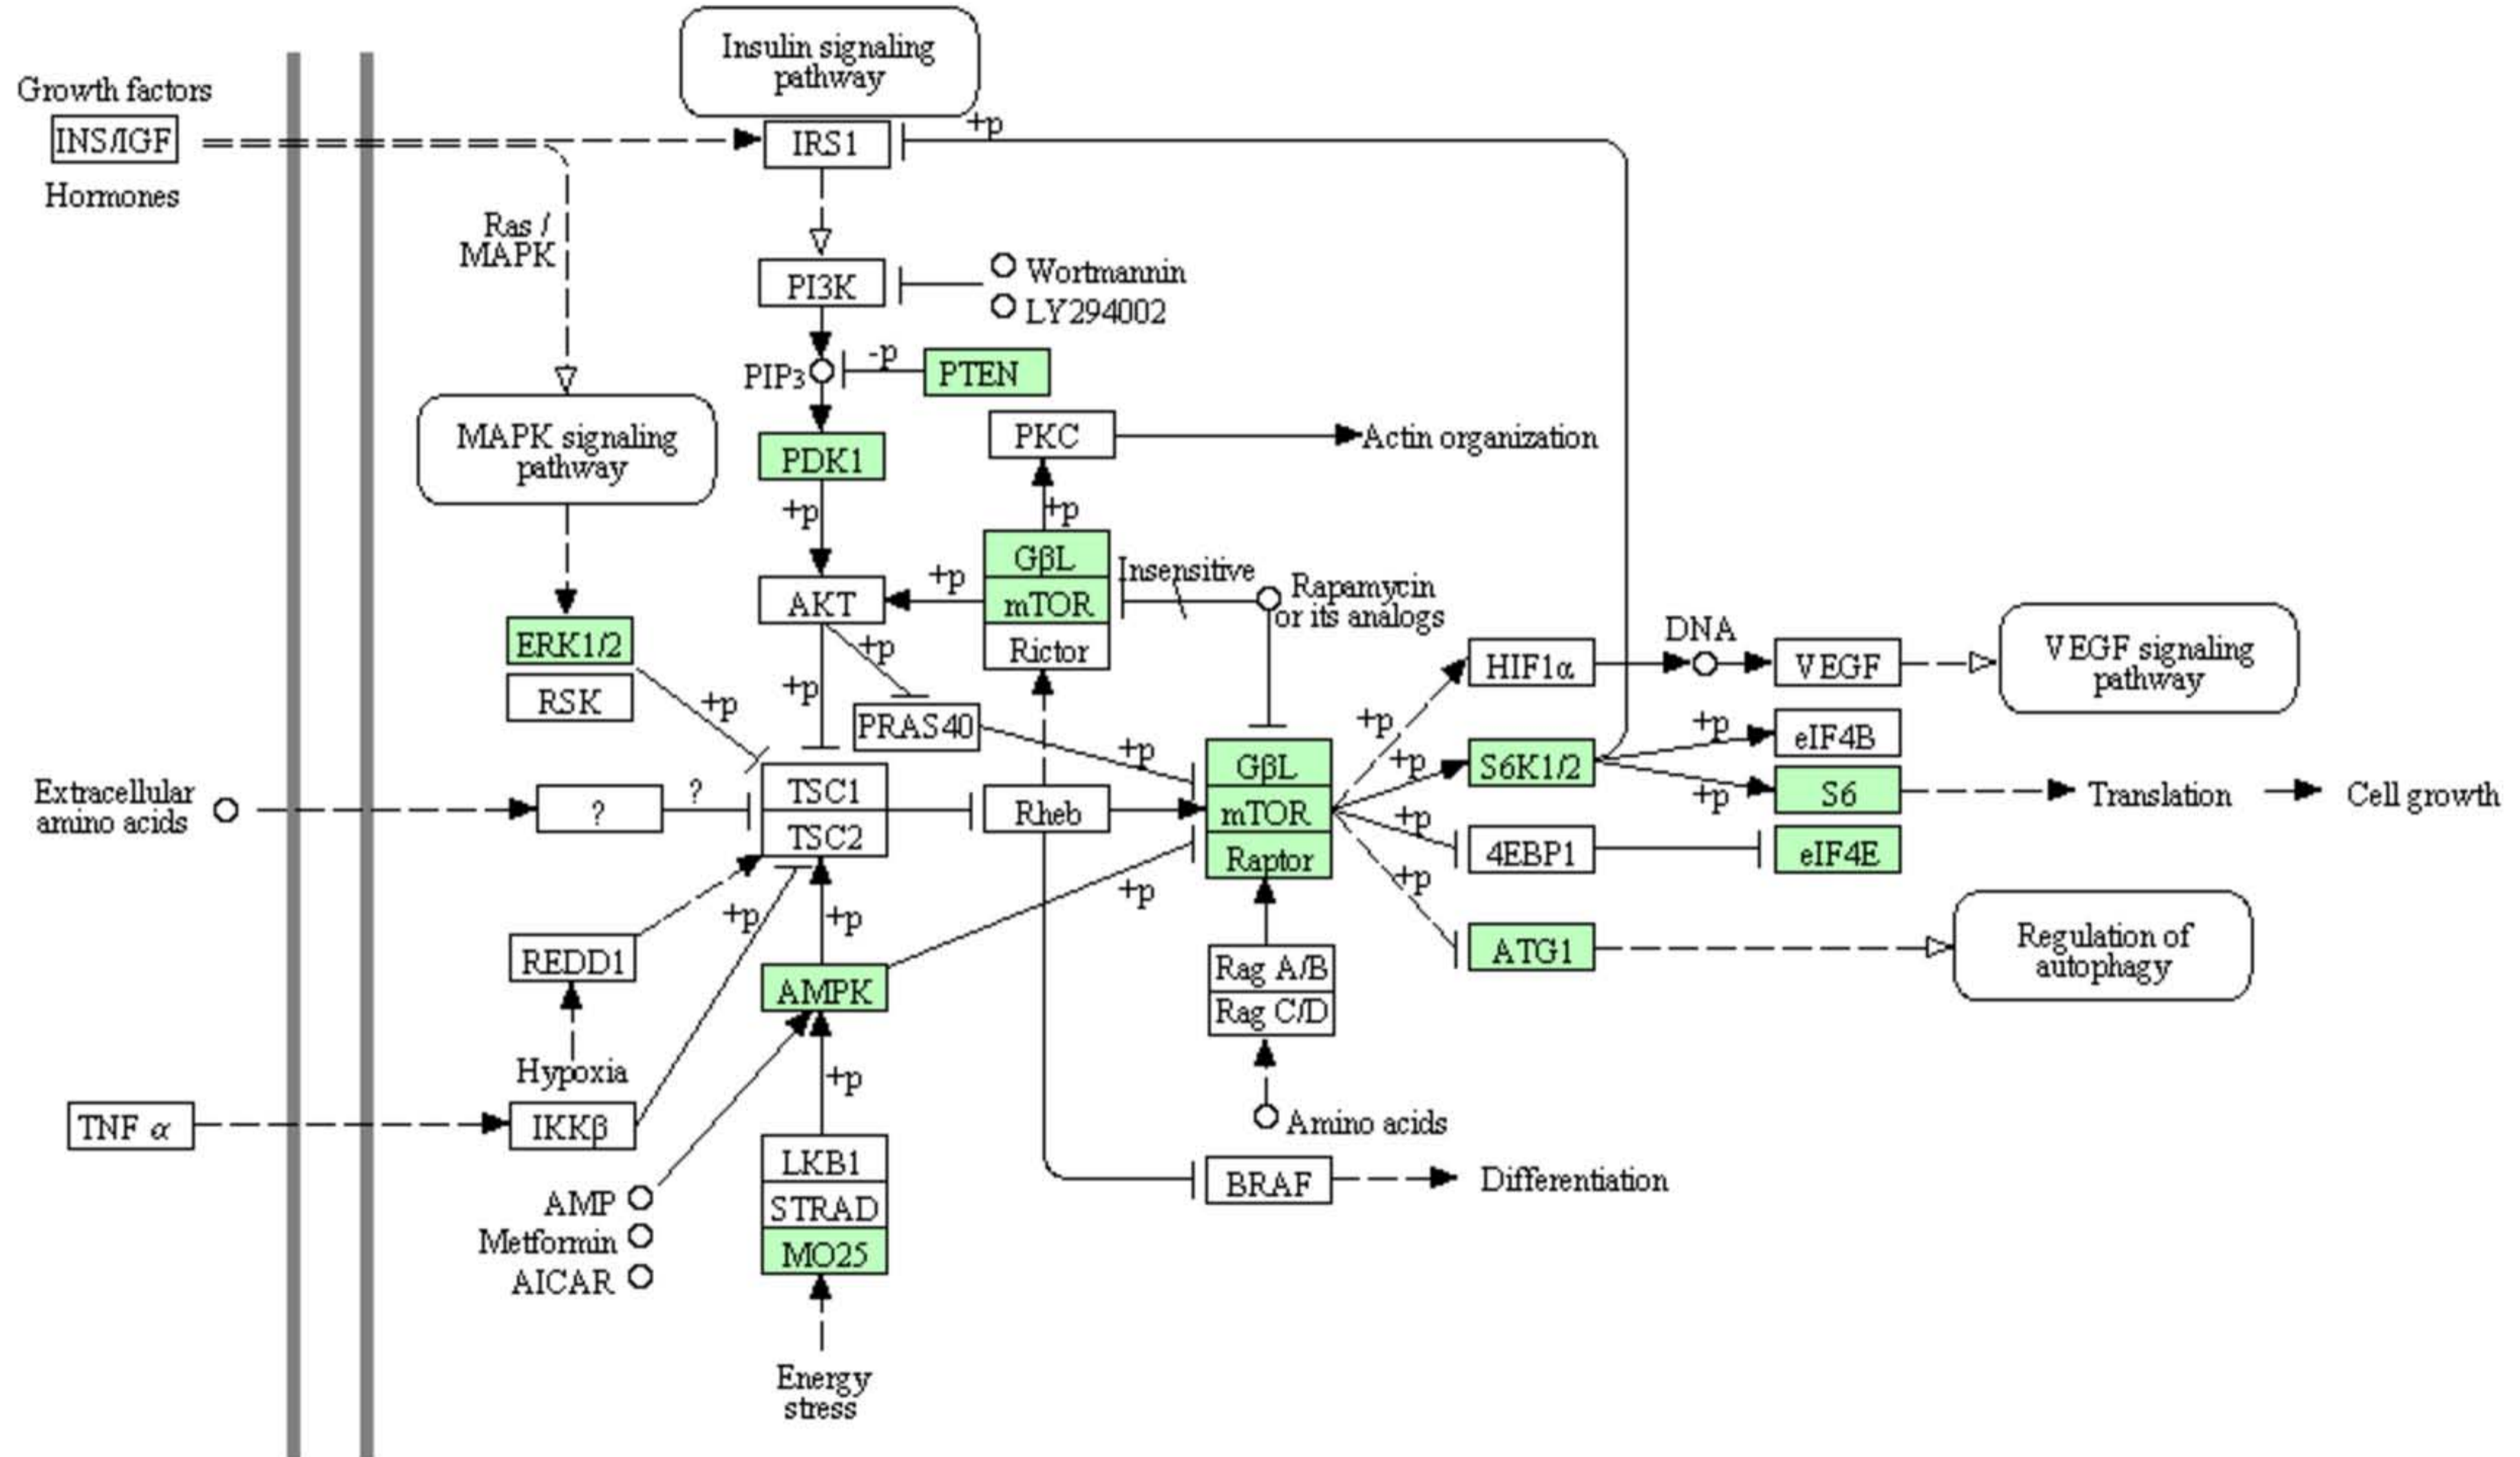



# NAPHTHALENE DEGRADATION

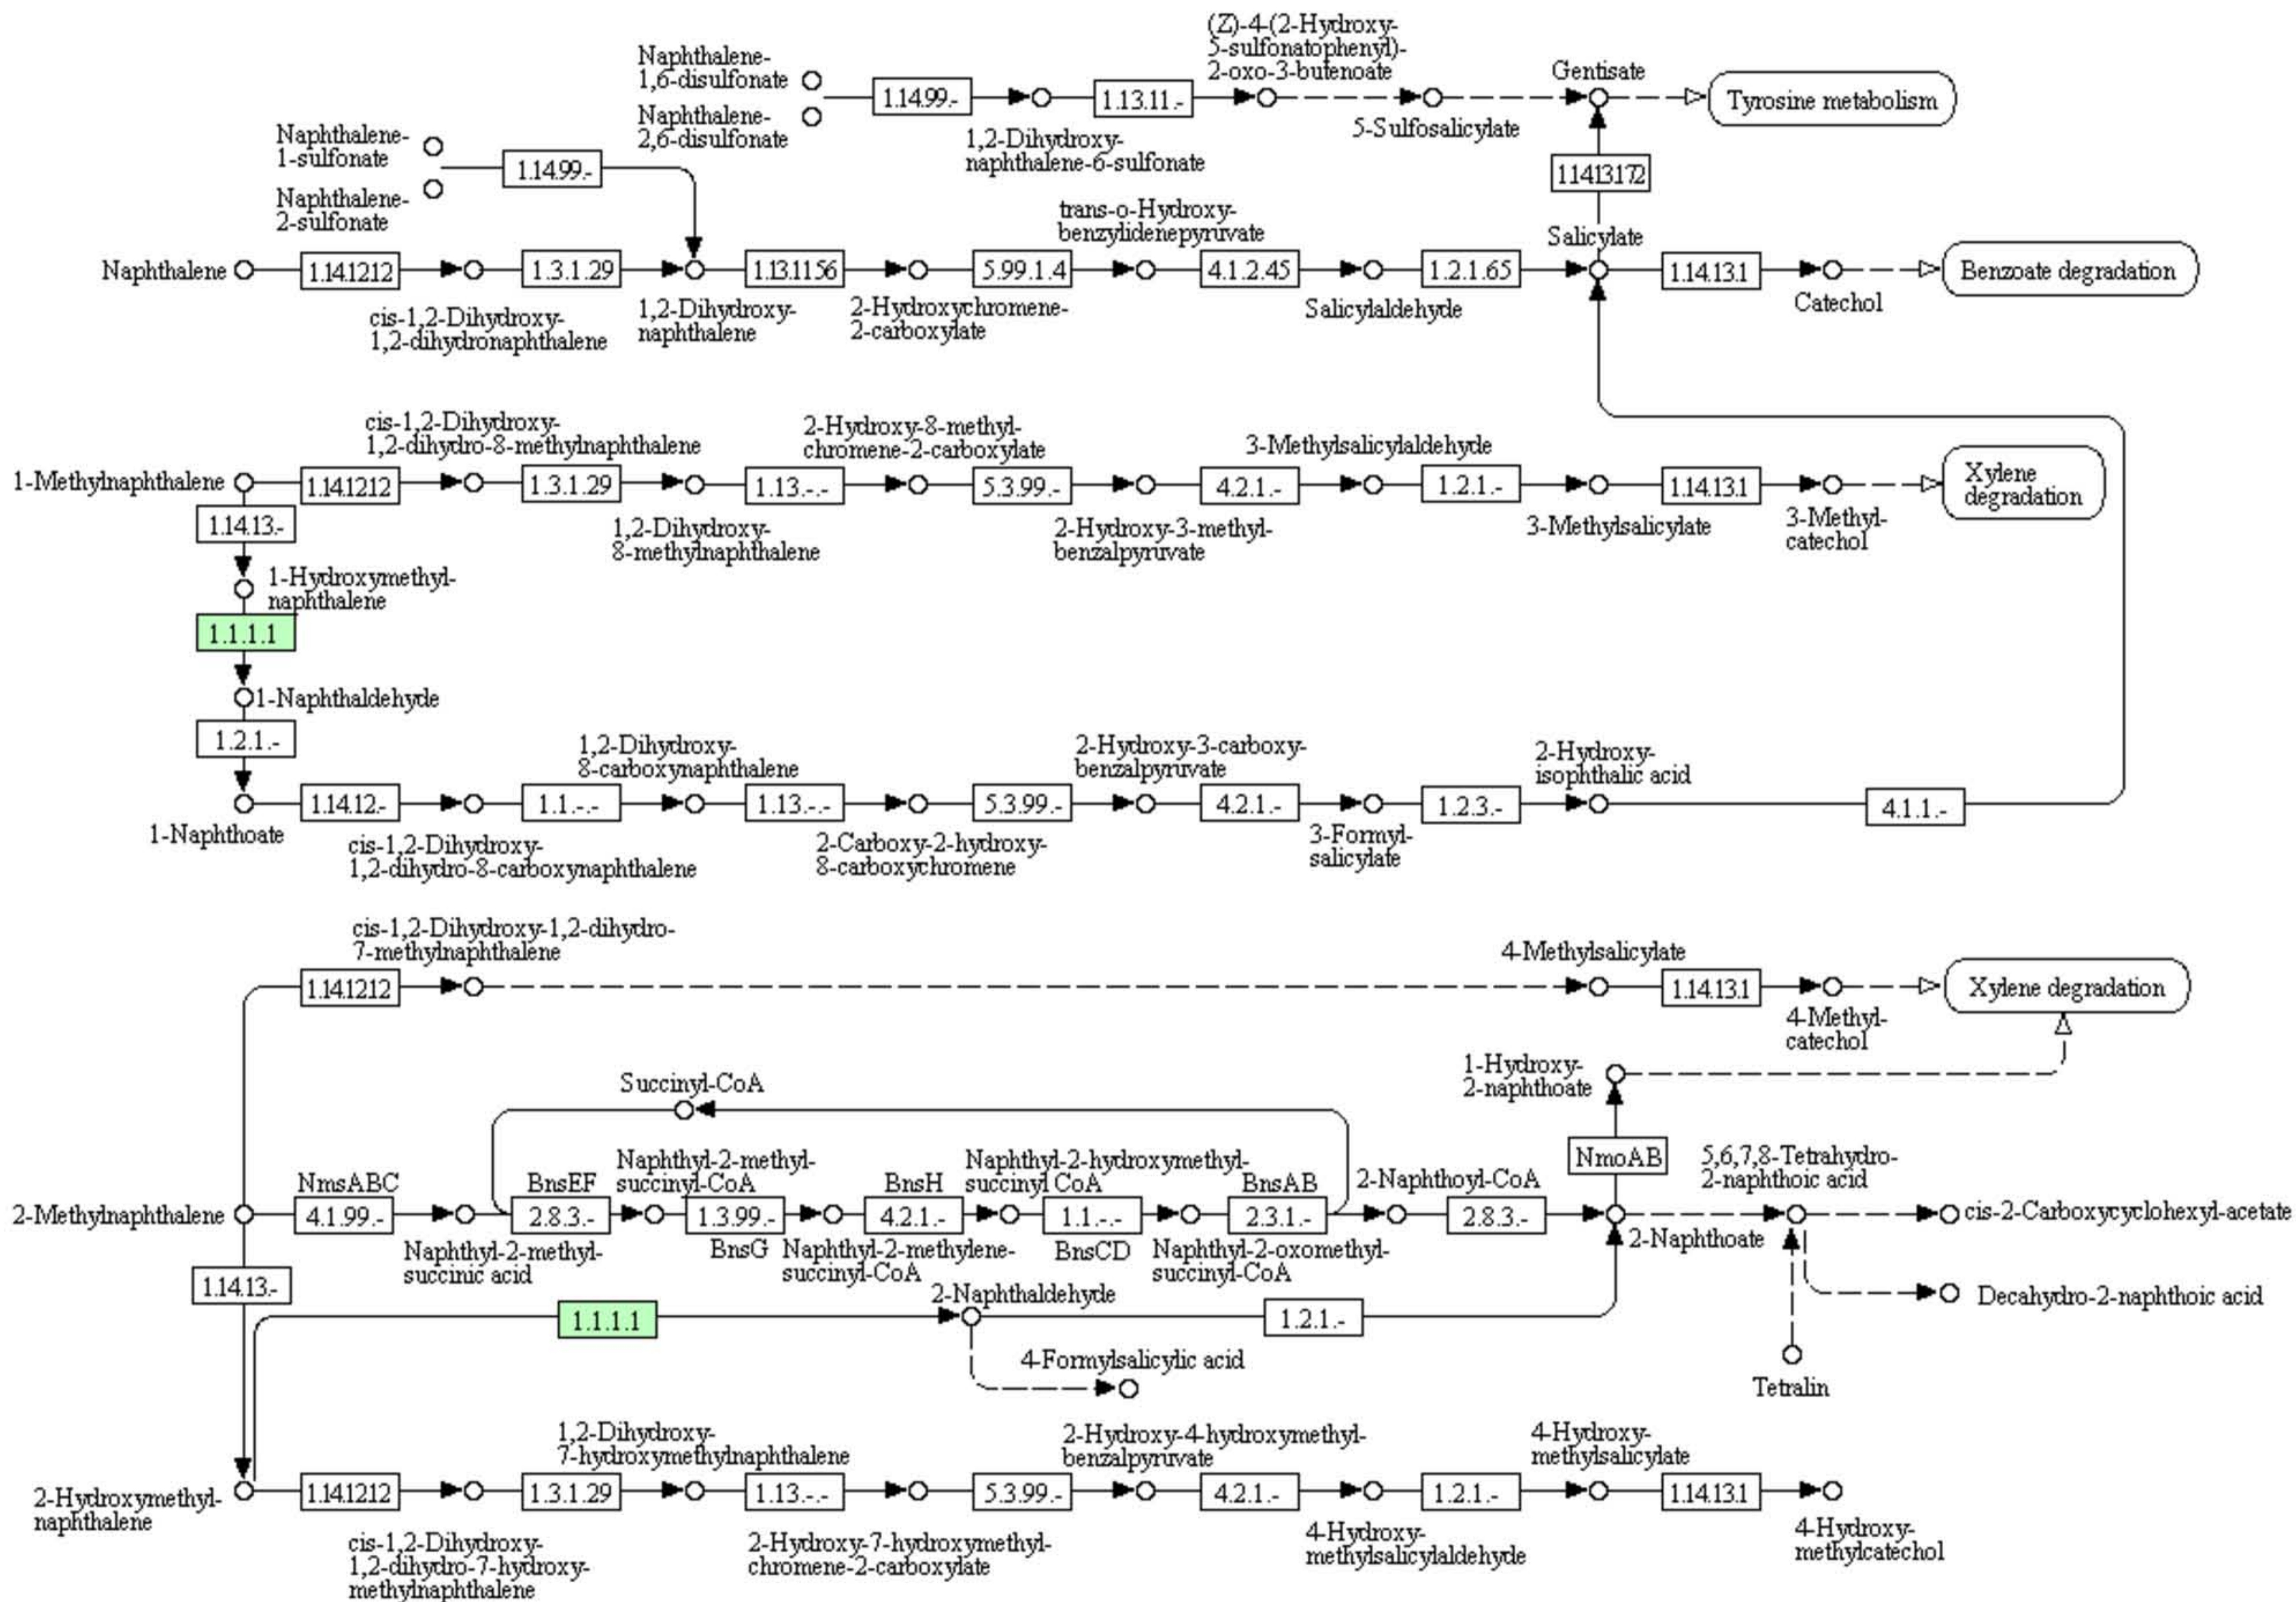



**NF-KAPPA B SIGNALING PATHWAY**

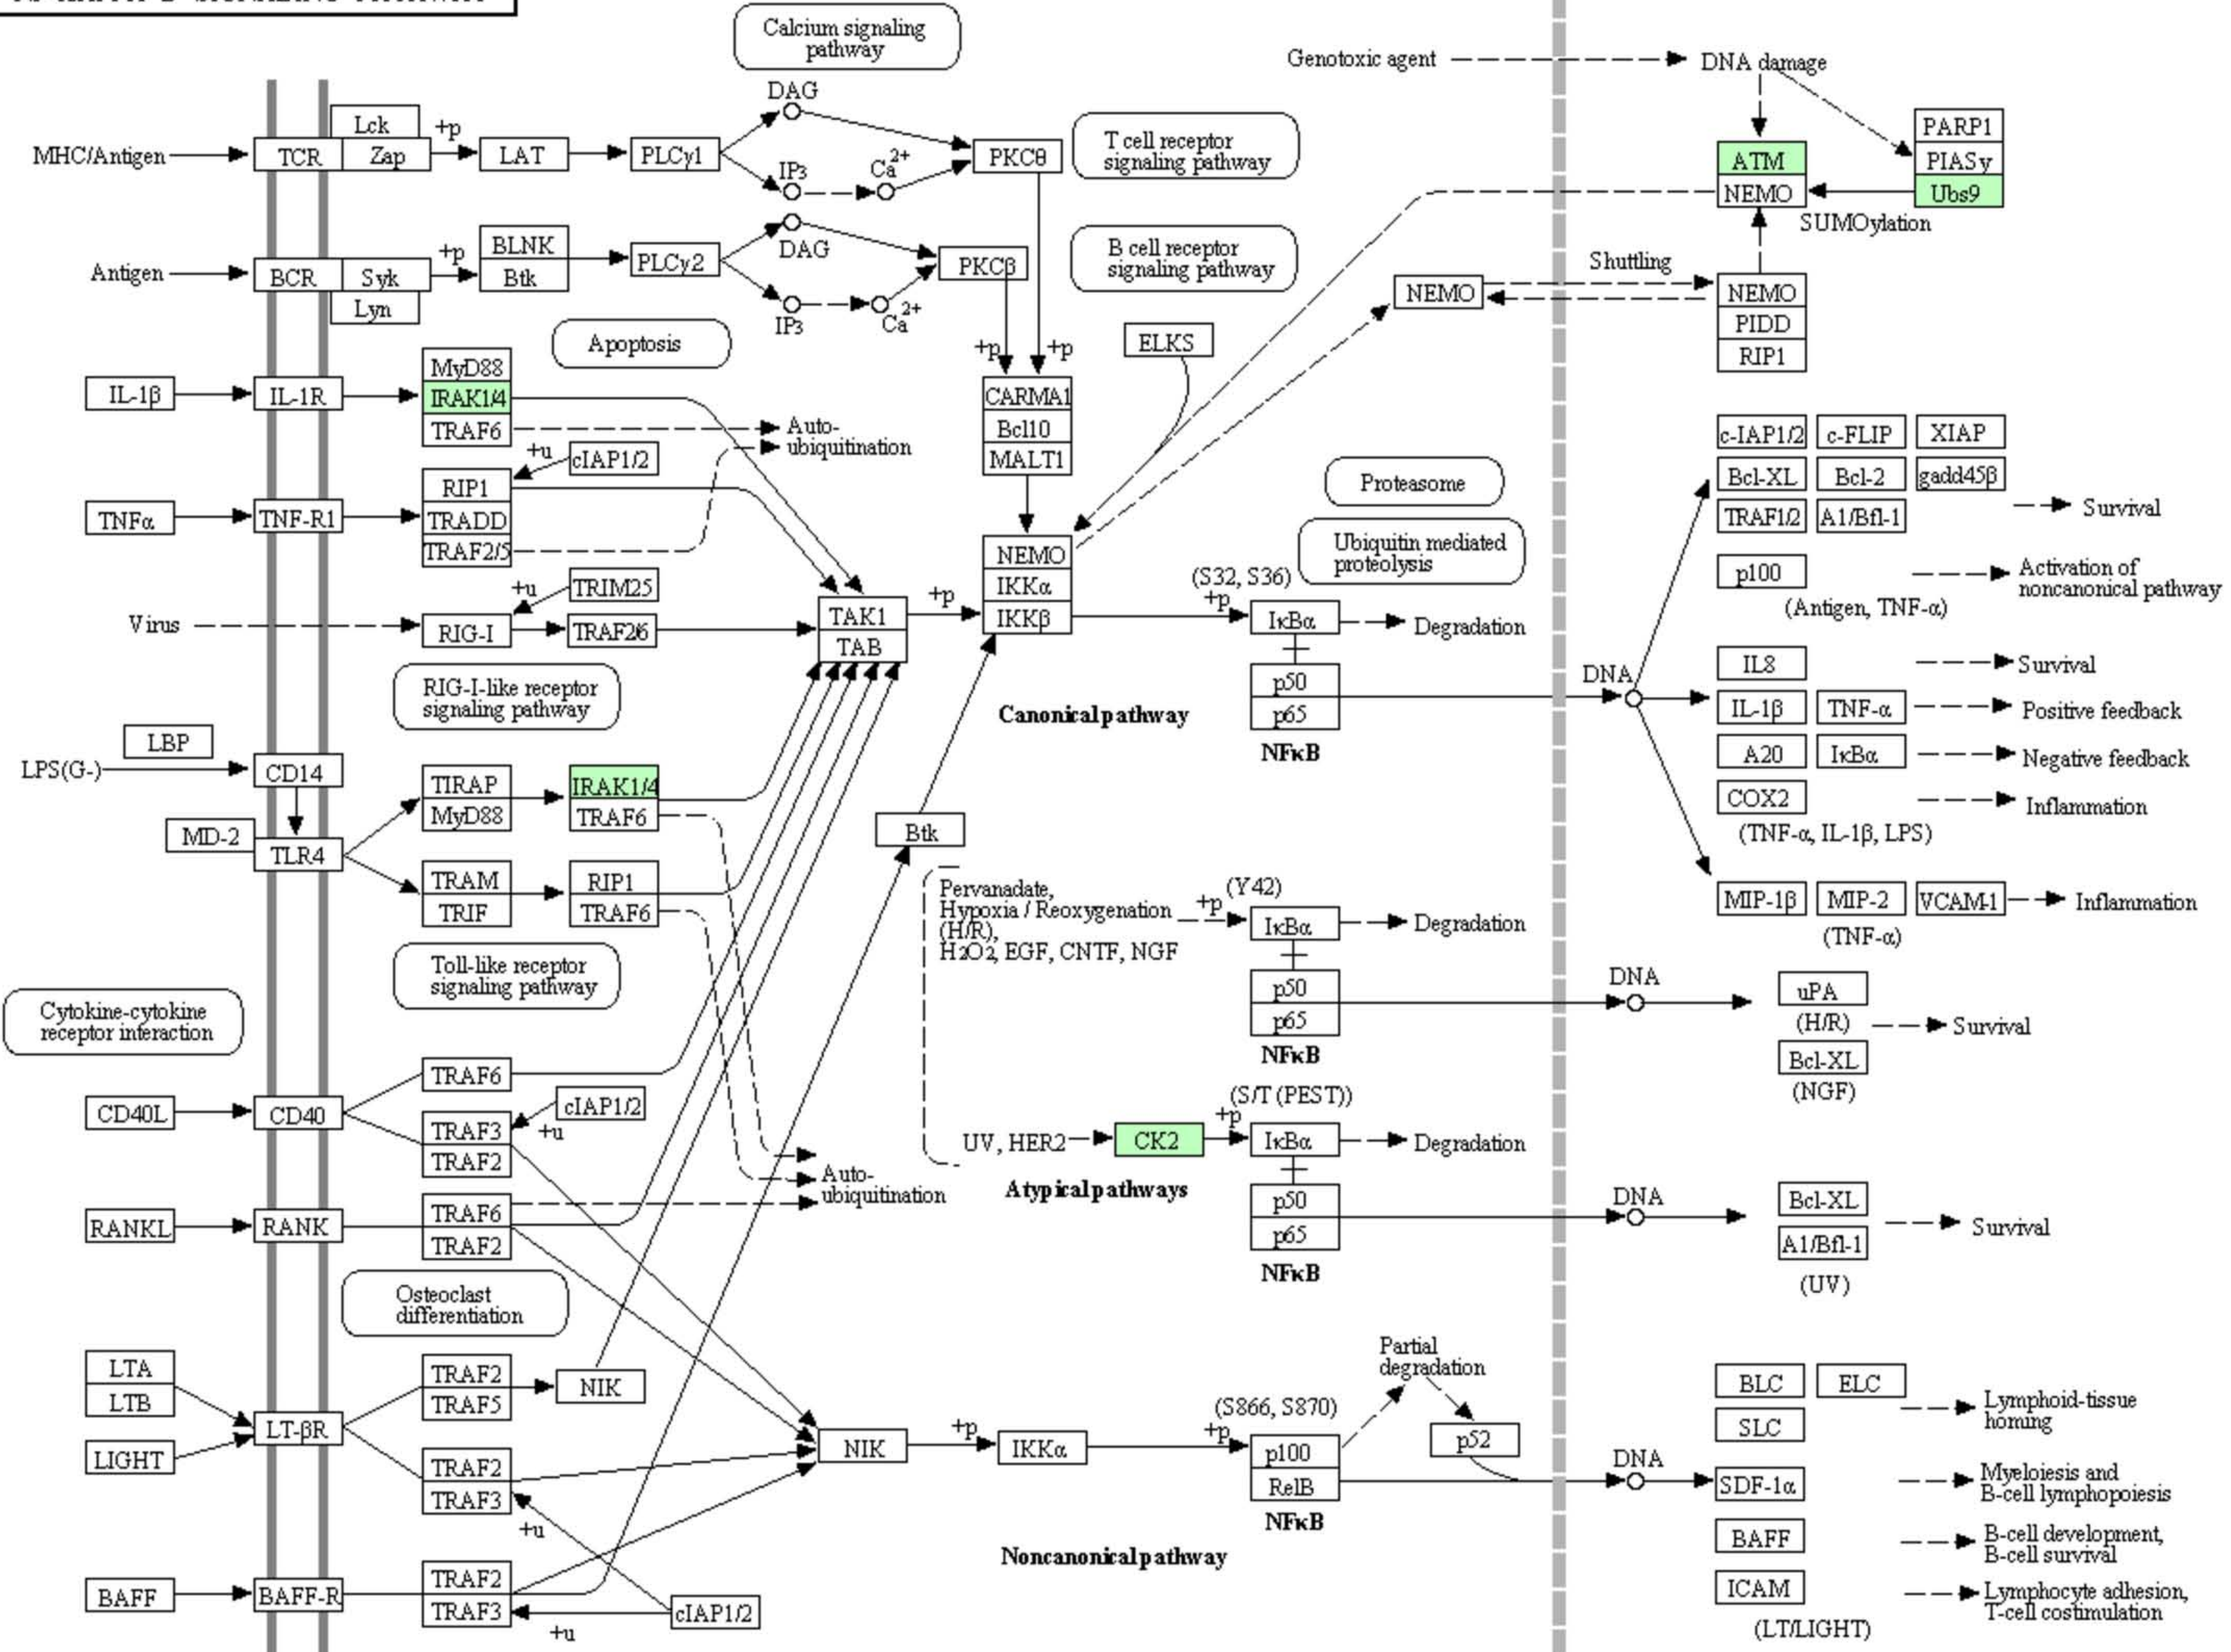



# N-GLYCAN BIOSYNTHESIS

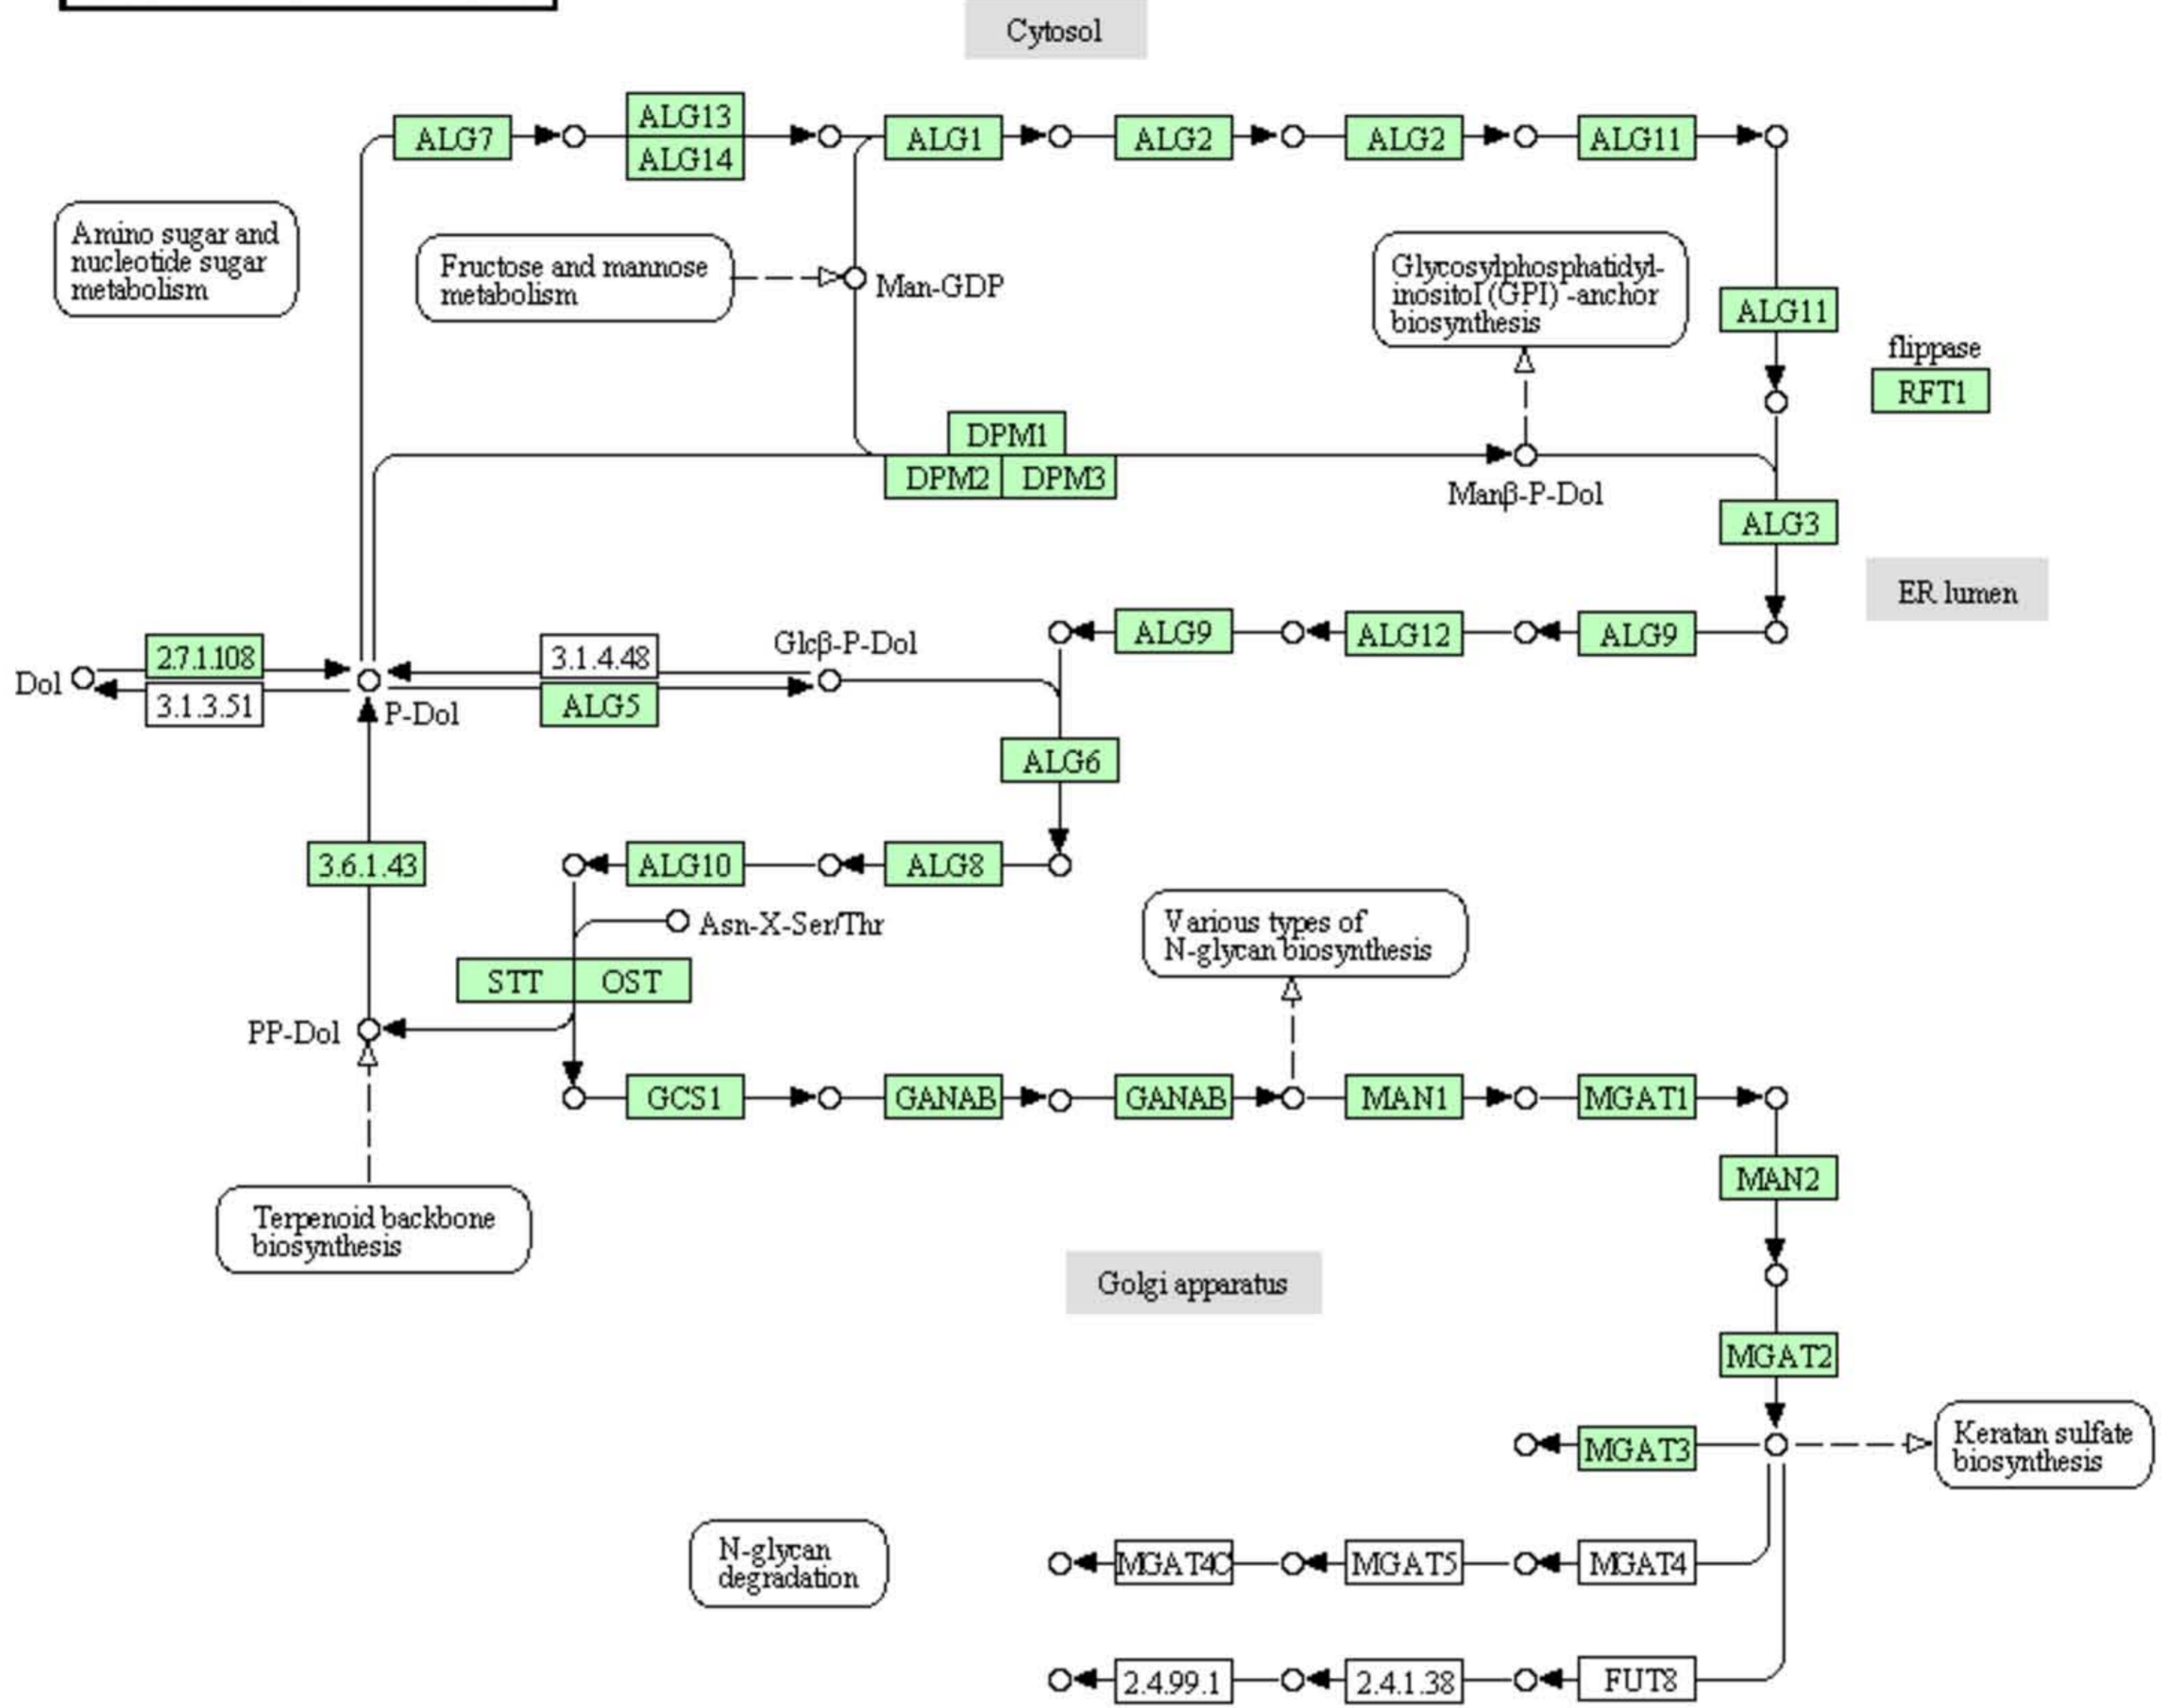

## N-glycan precursor biosynthesis

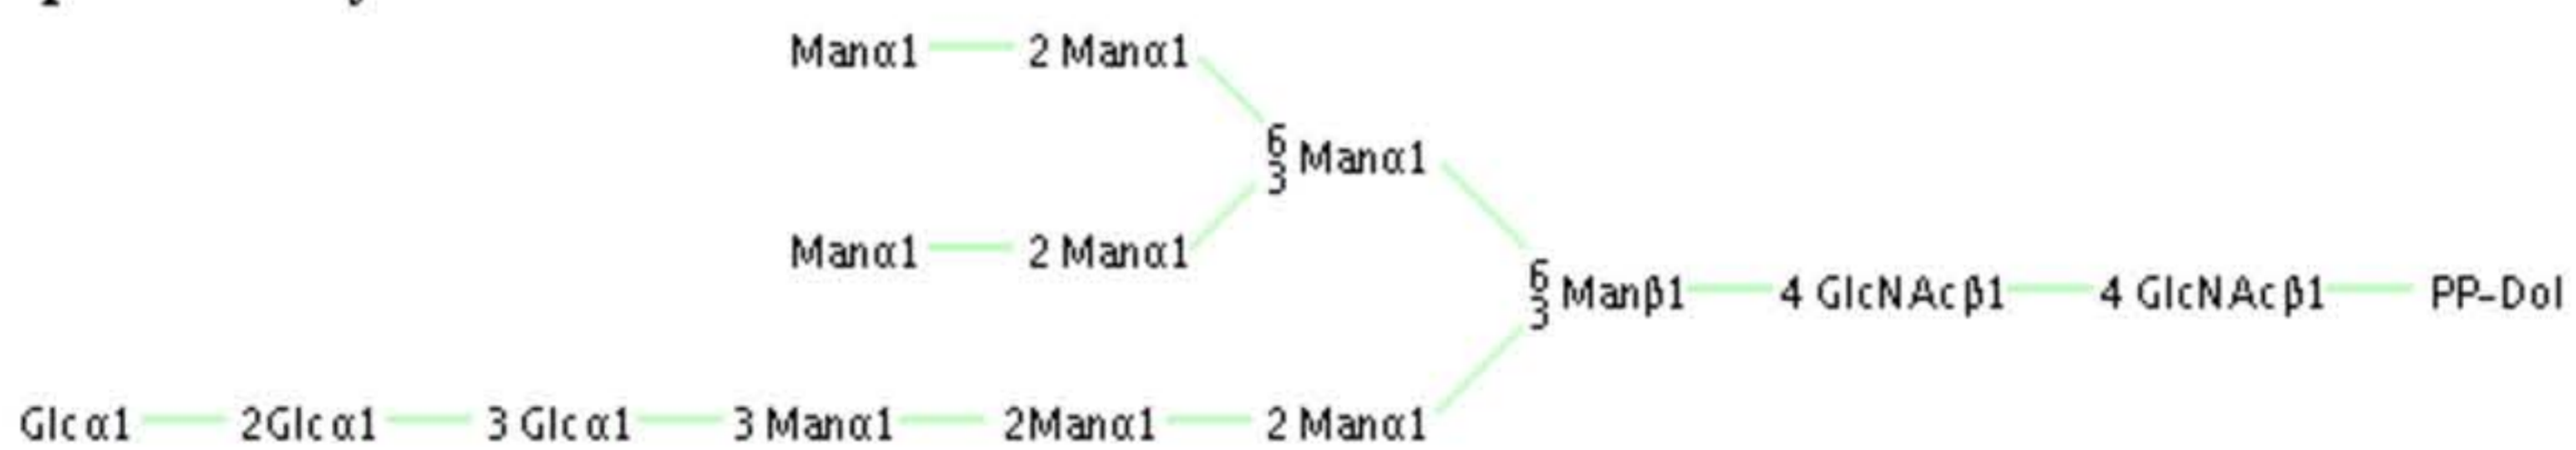

## Trimming to form core structure

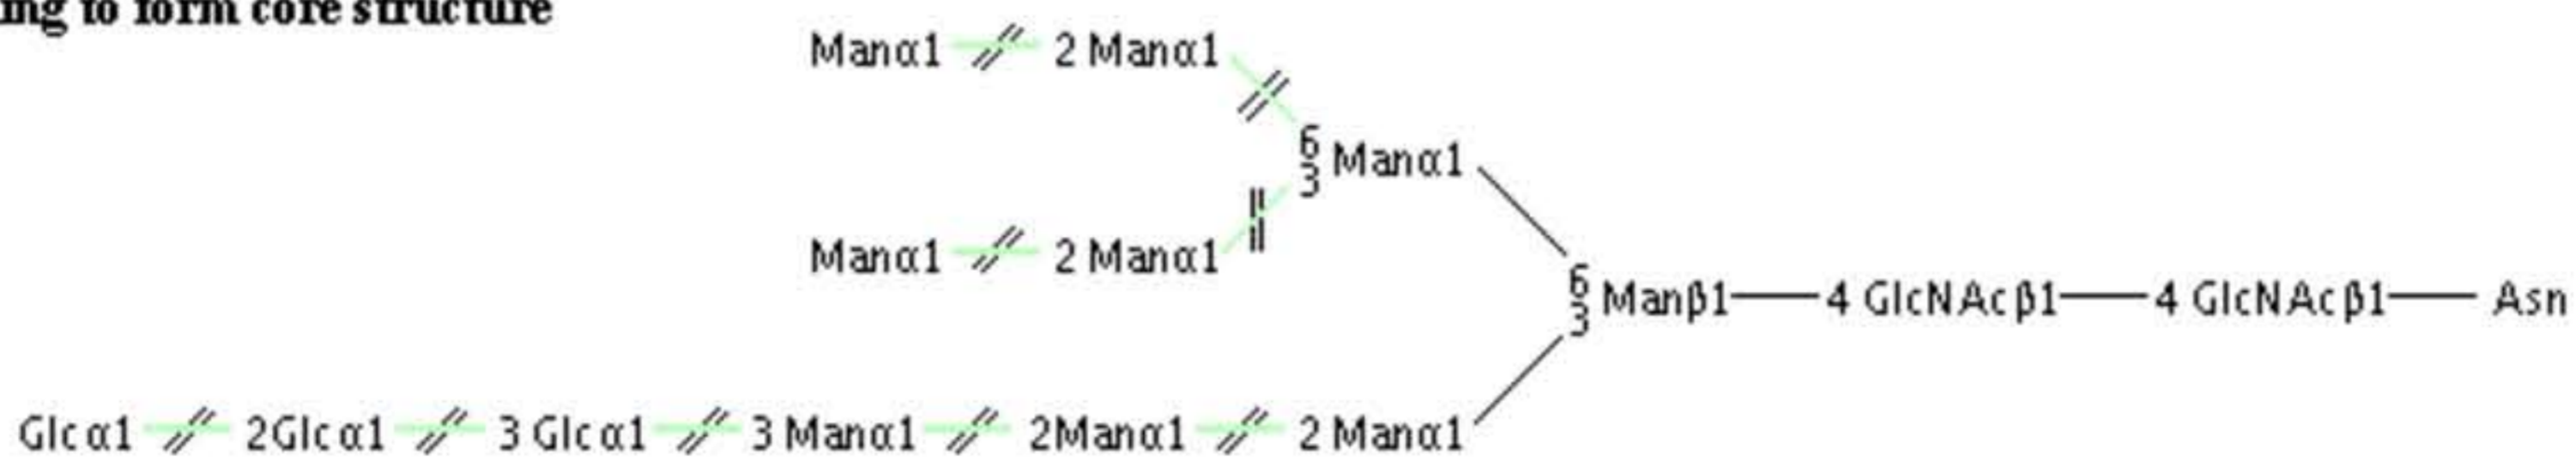

## Glycan extension from core structure

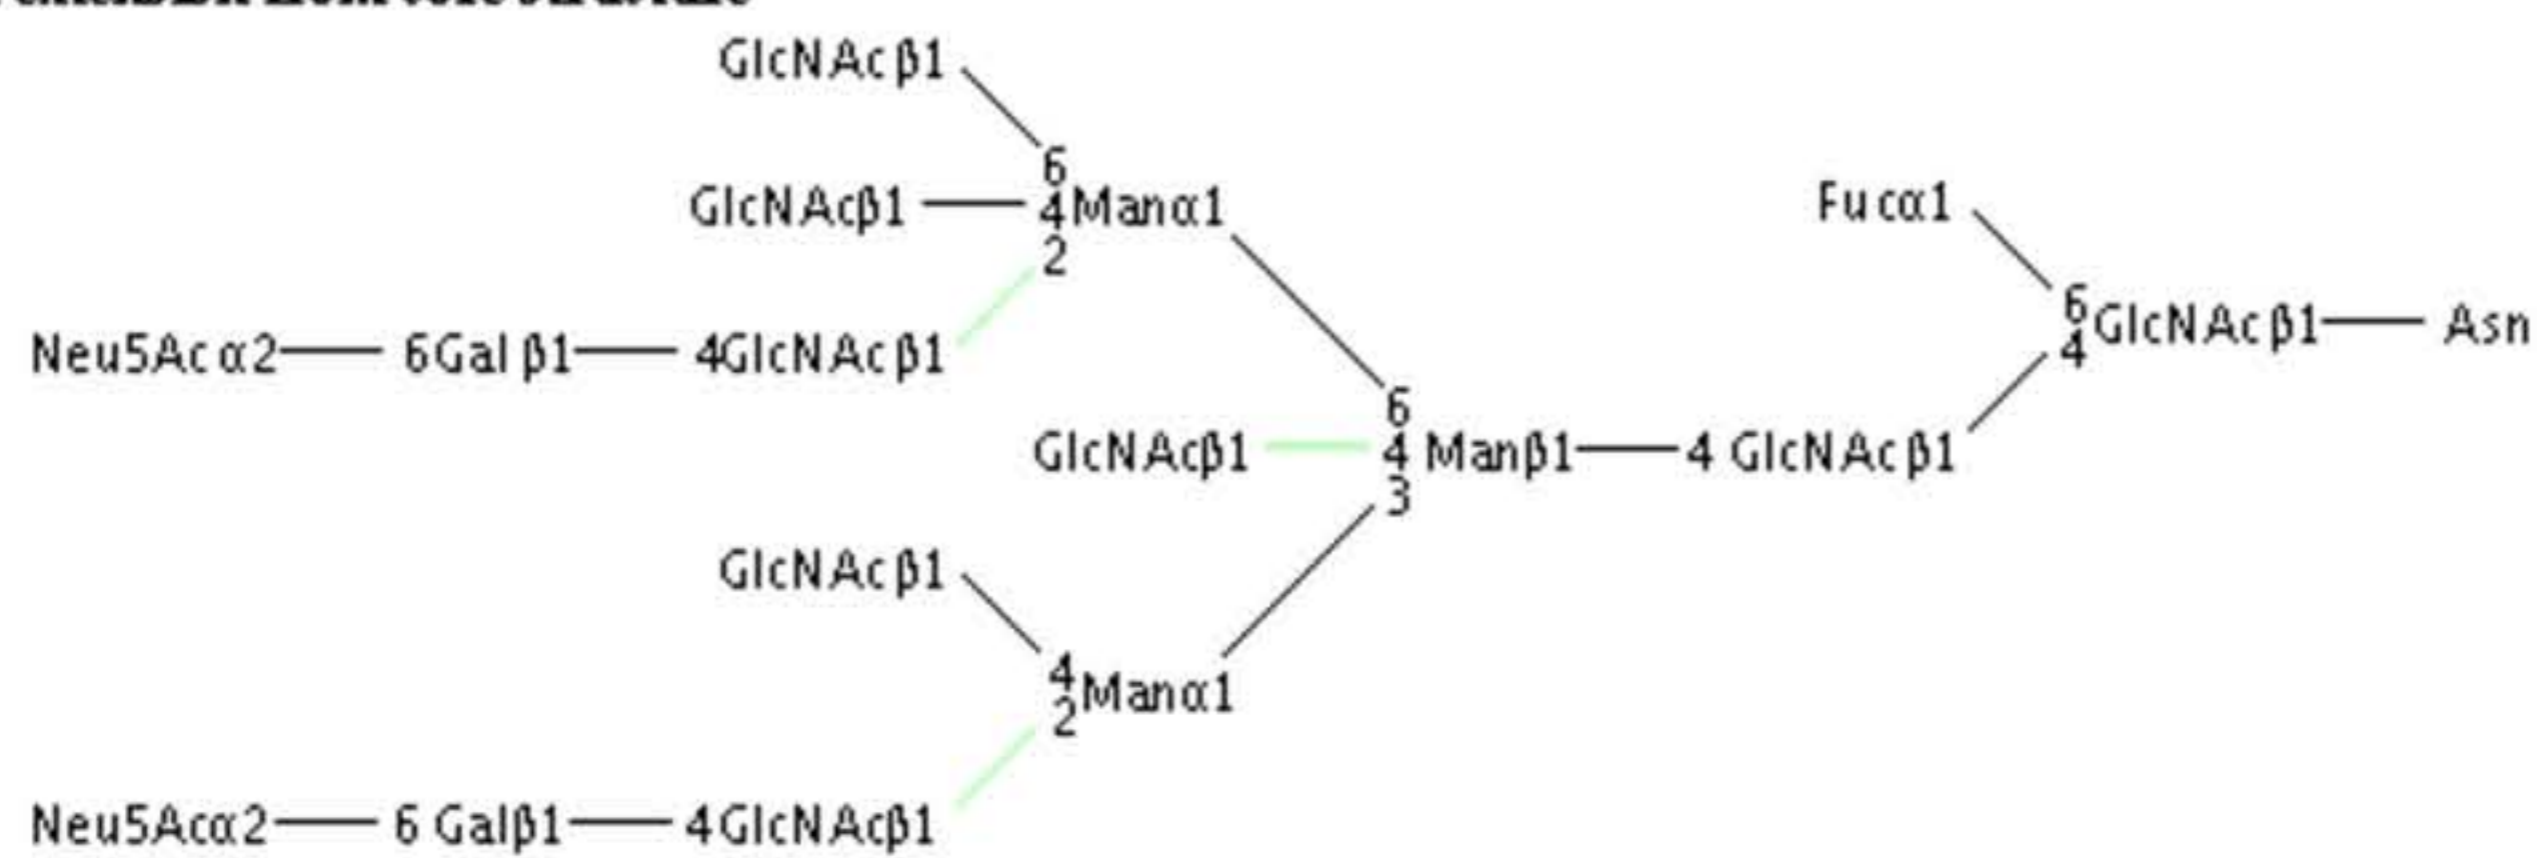



# NICOTINATE AND NICOTINAMIDE METABOLISM

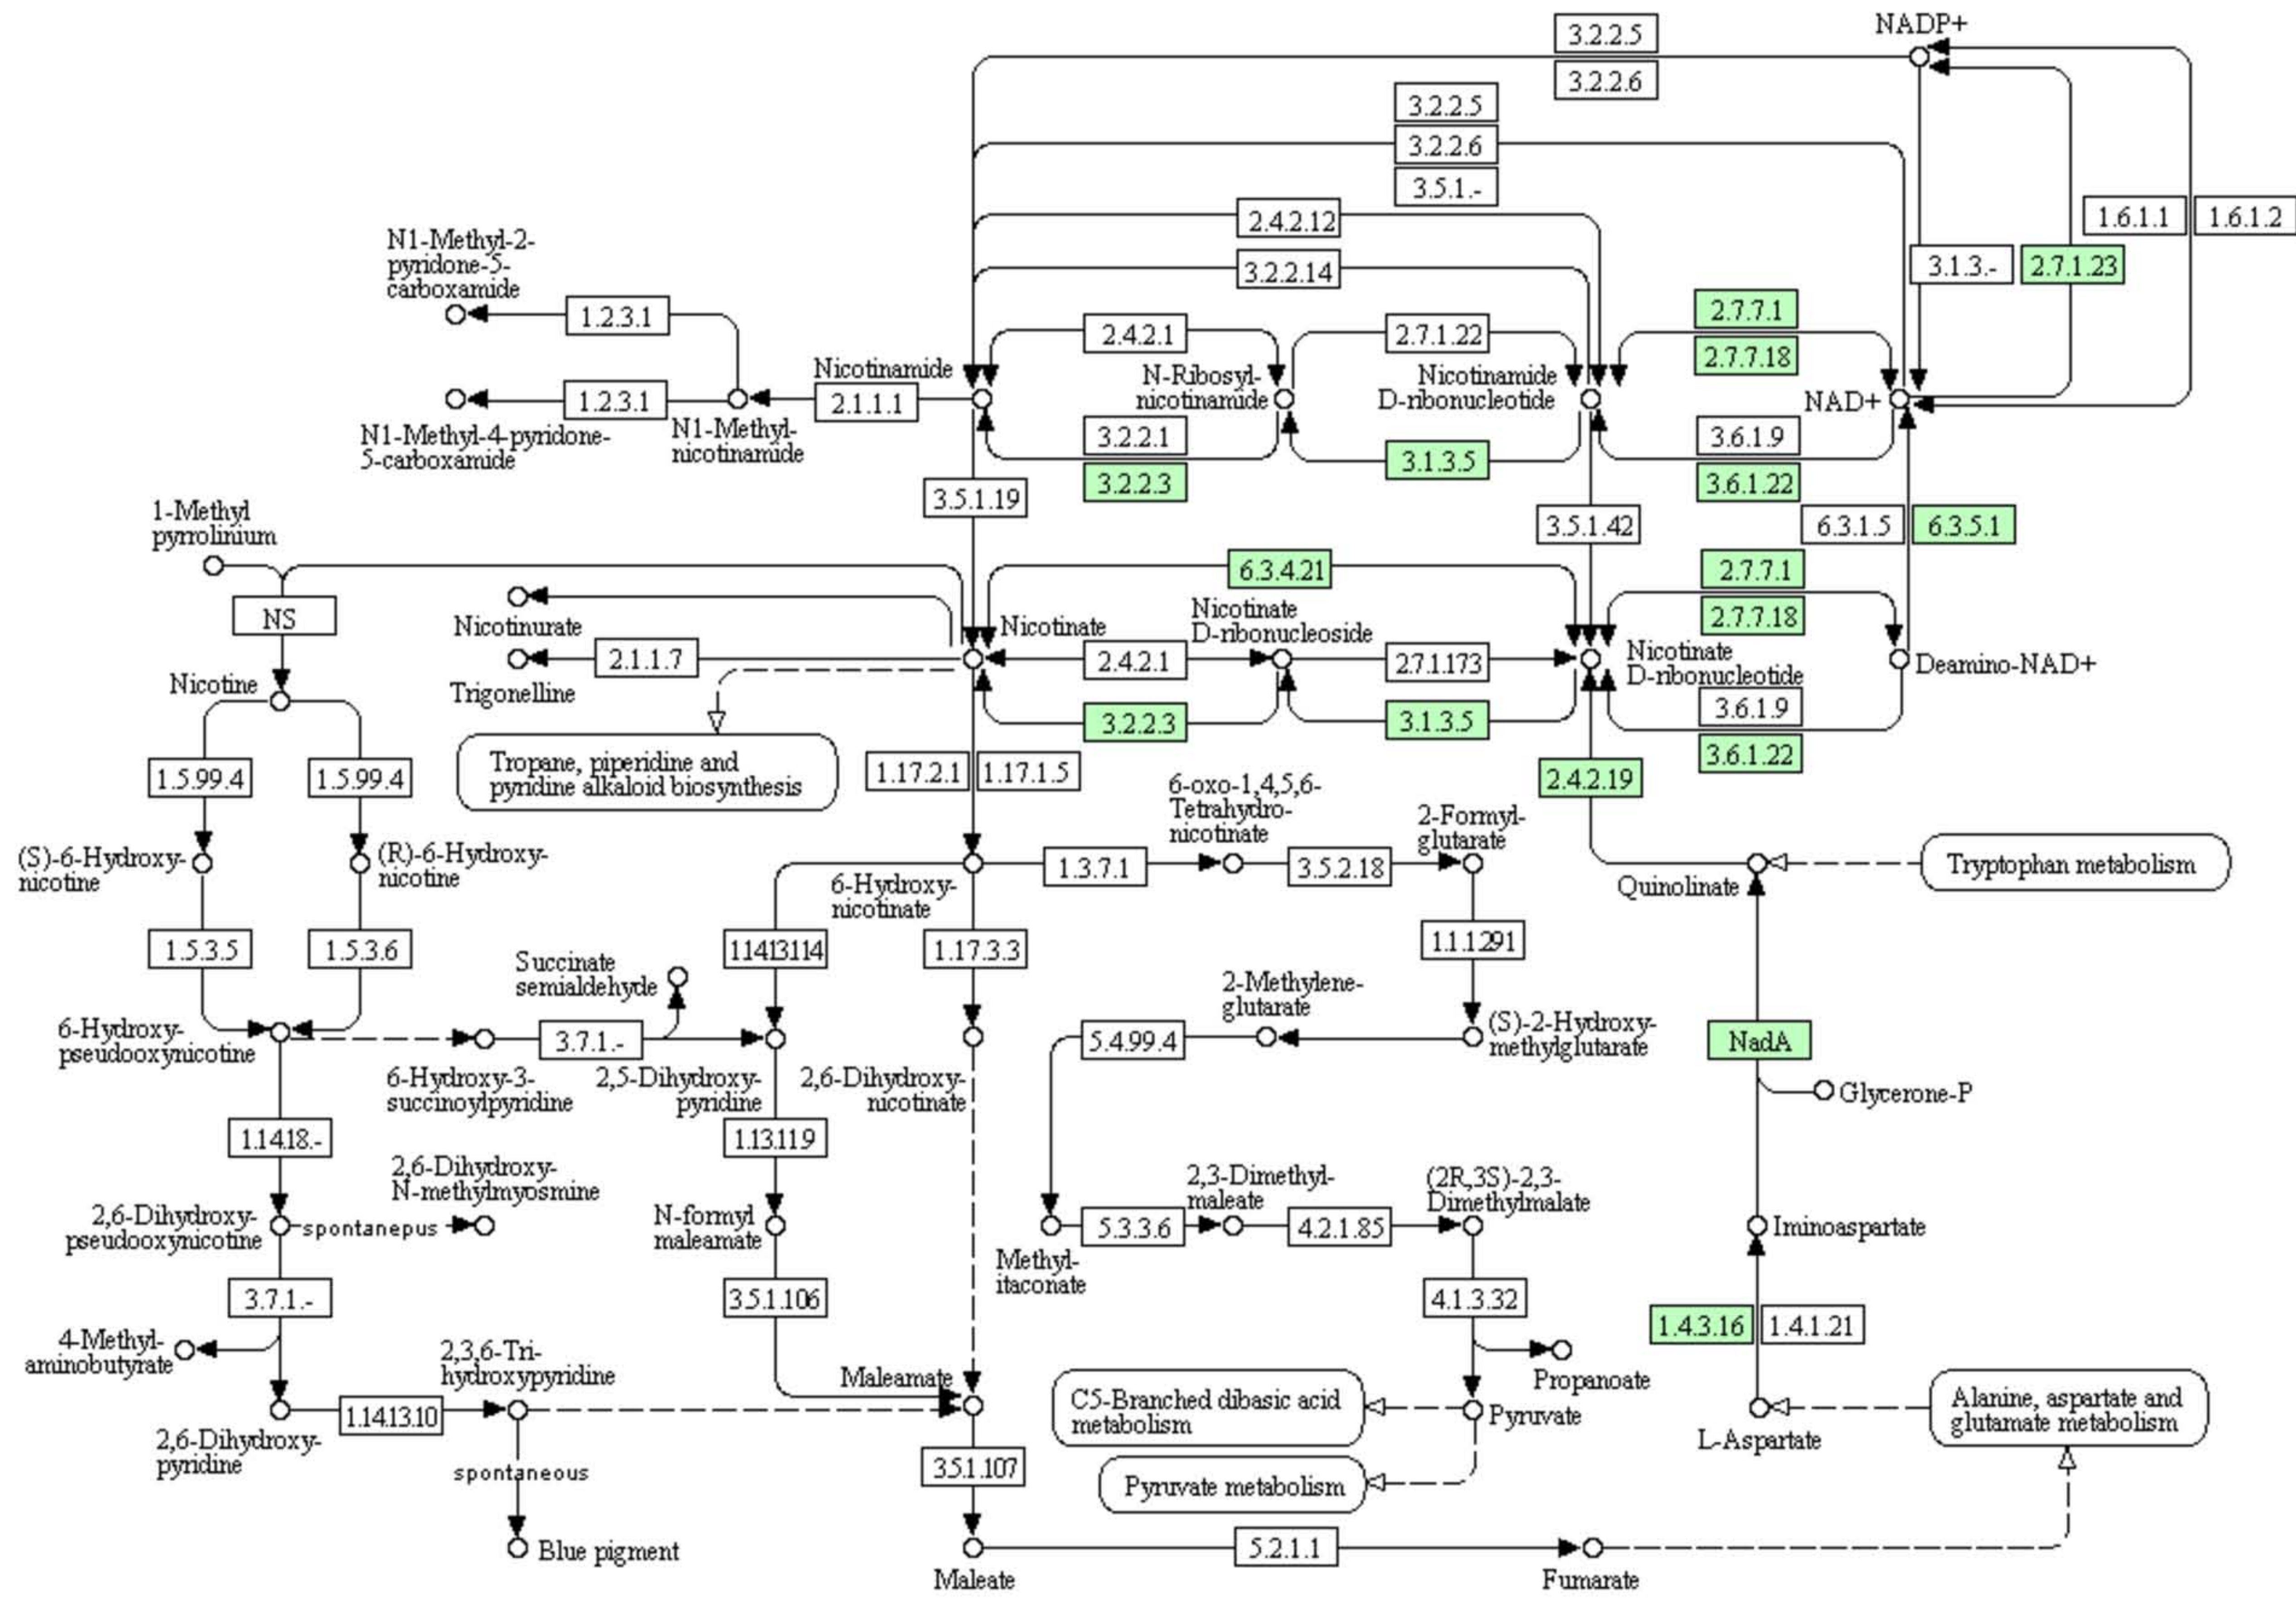



# NITROGEN METABOLISM

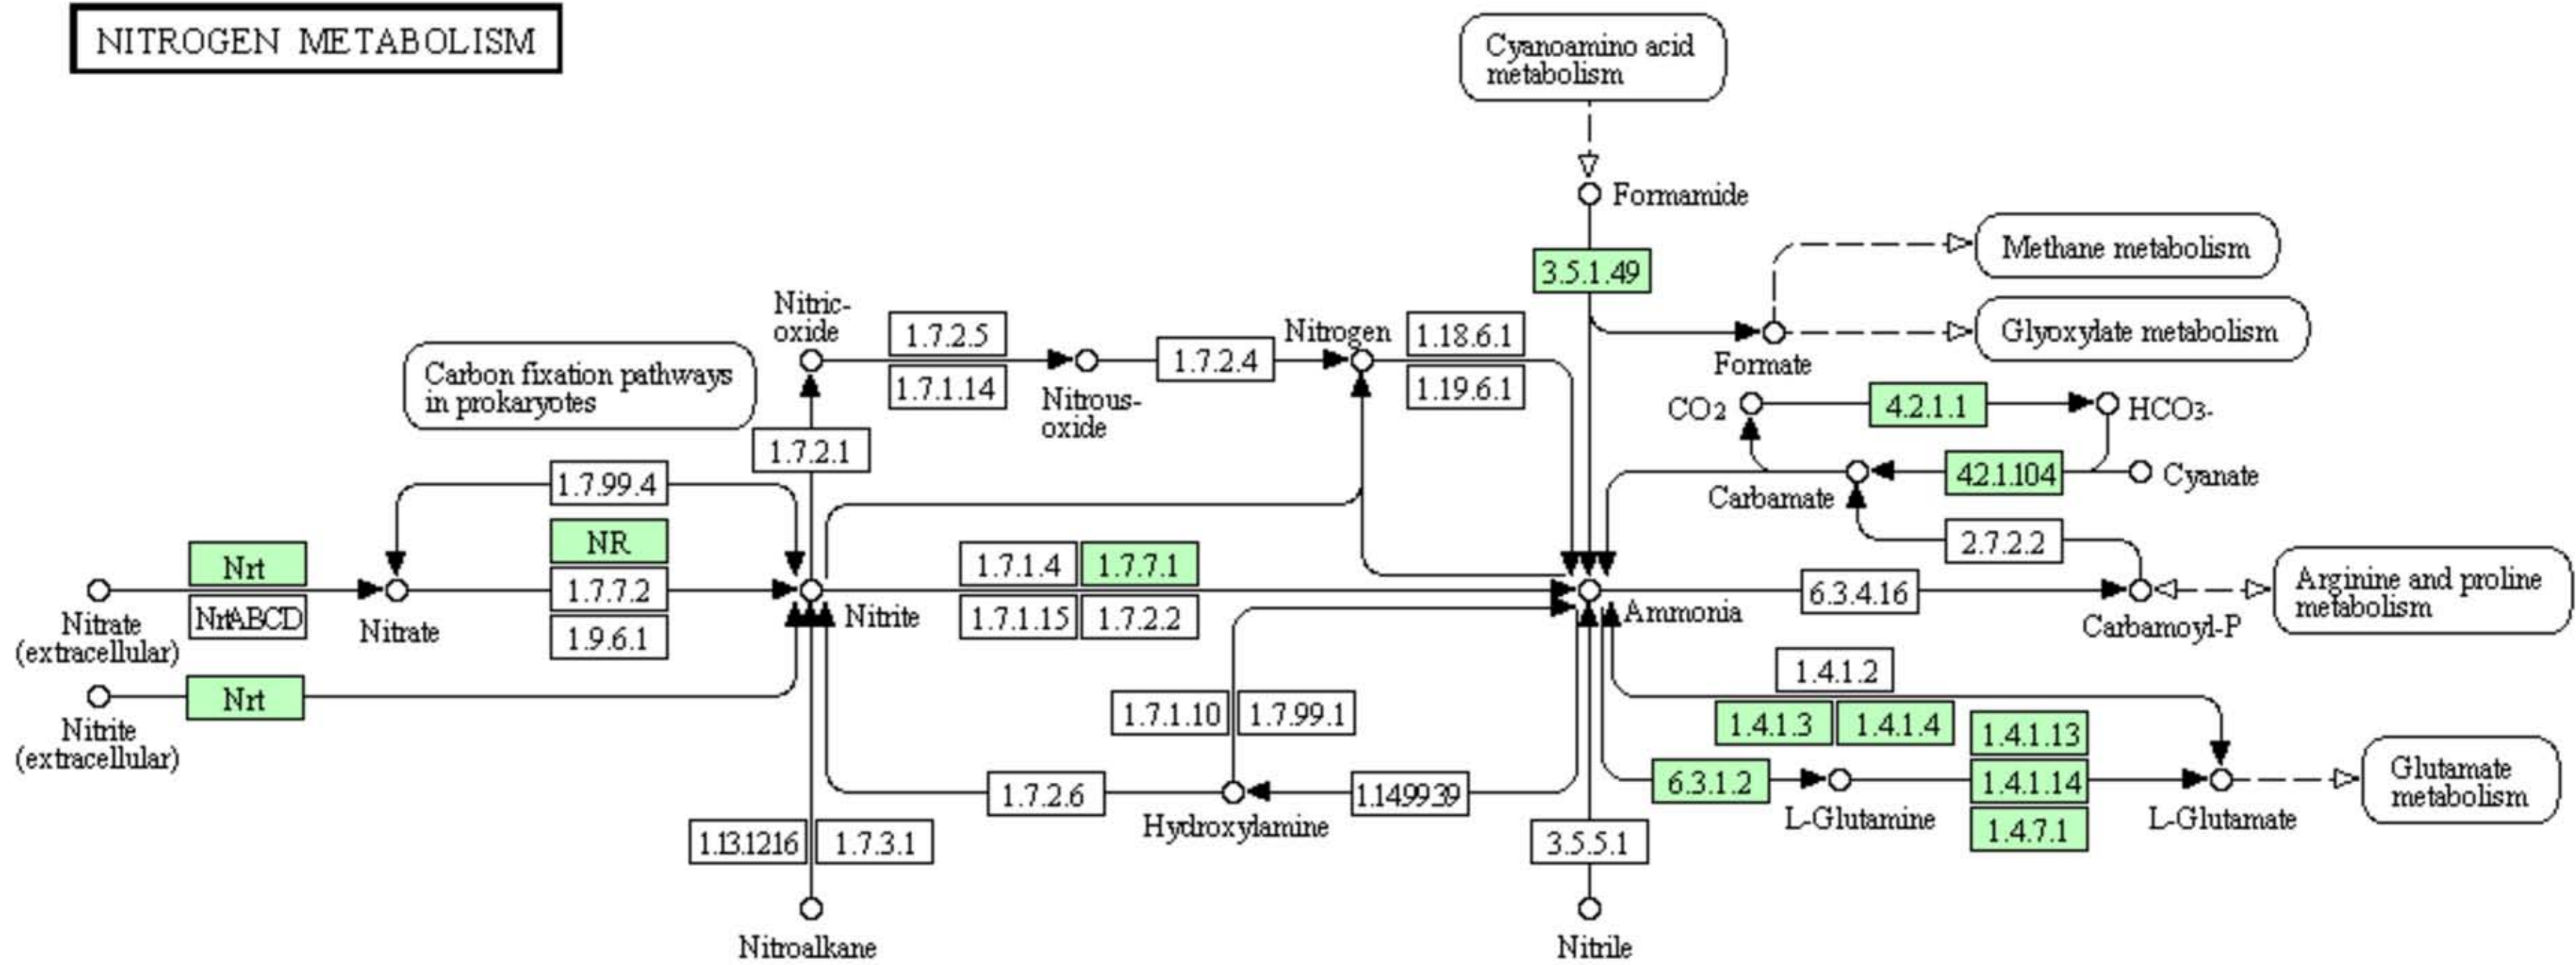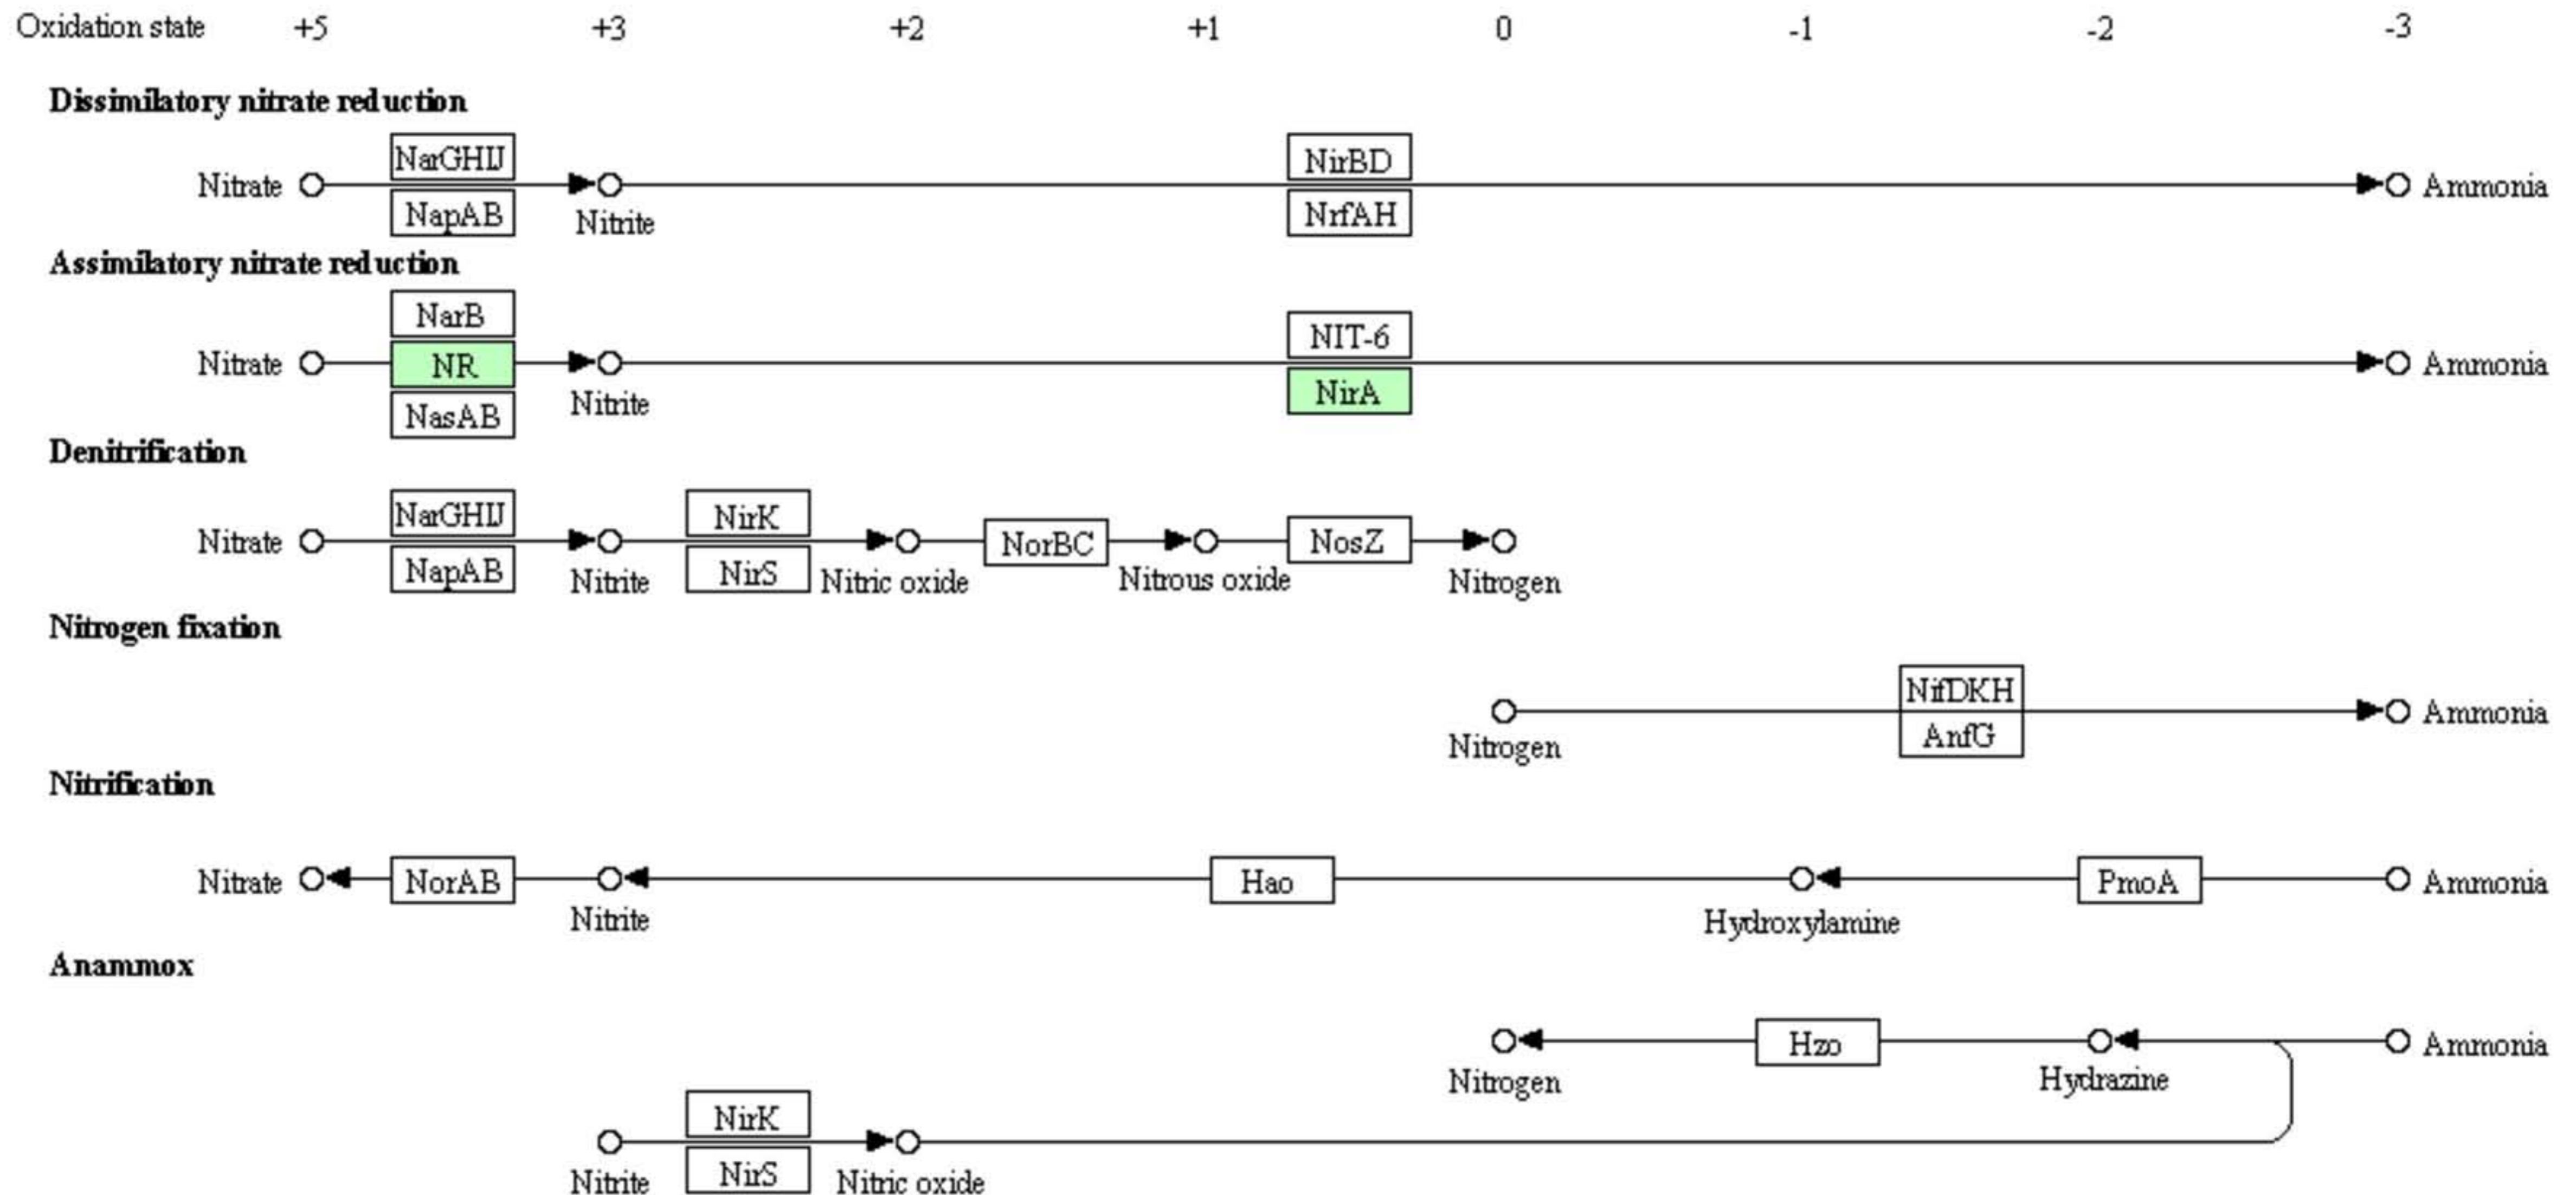



NOD-LIKE RECEPTOR SIGNALING PATHWAY

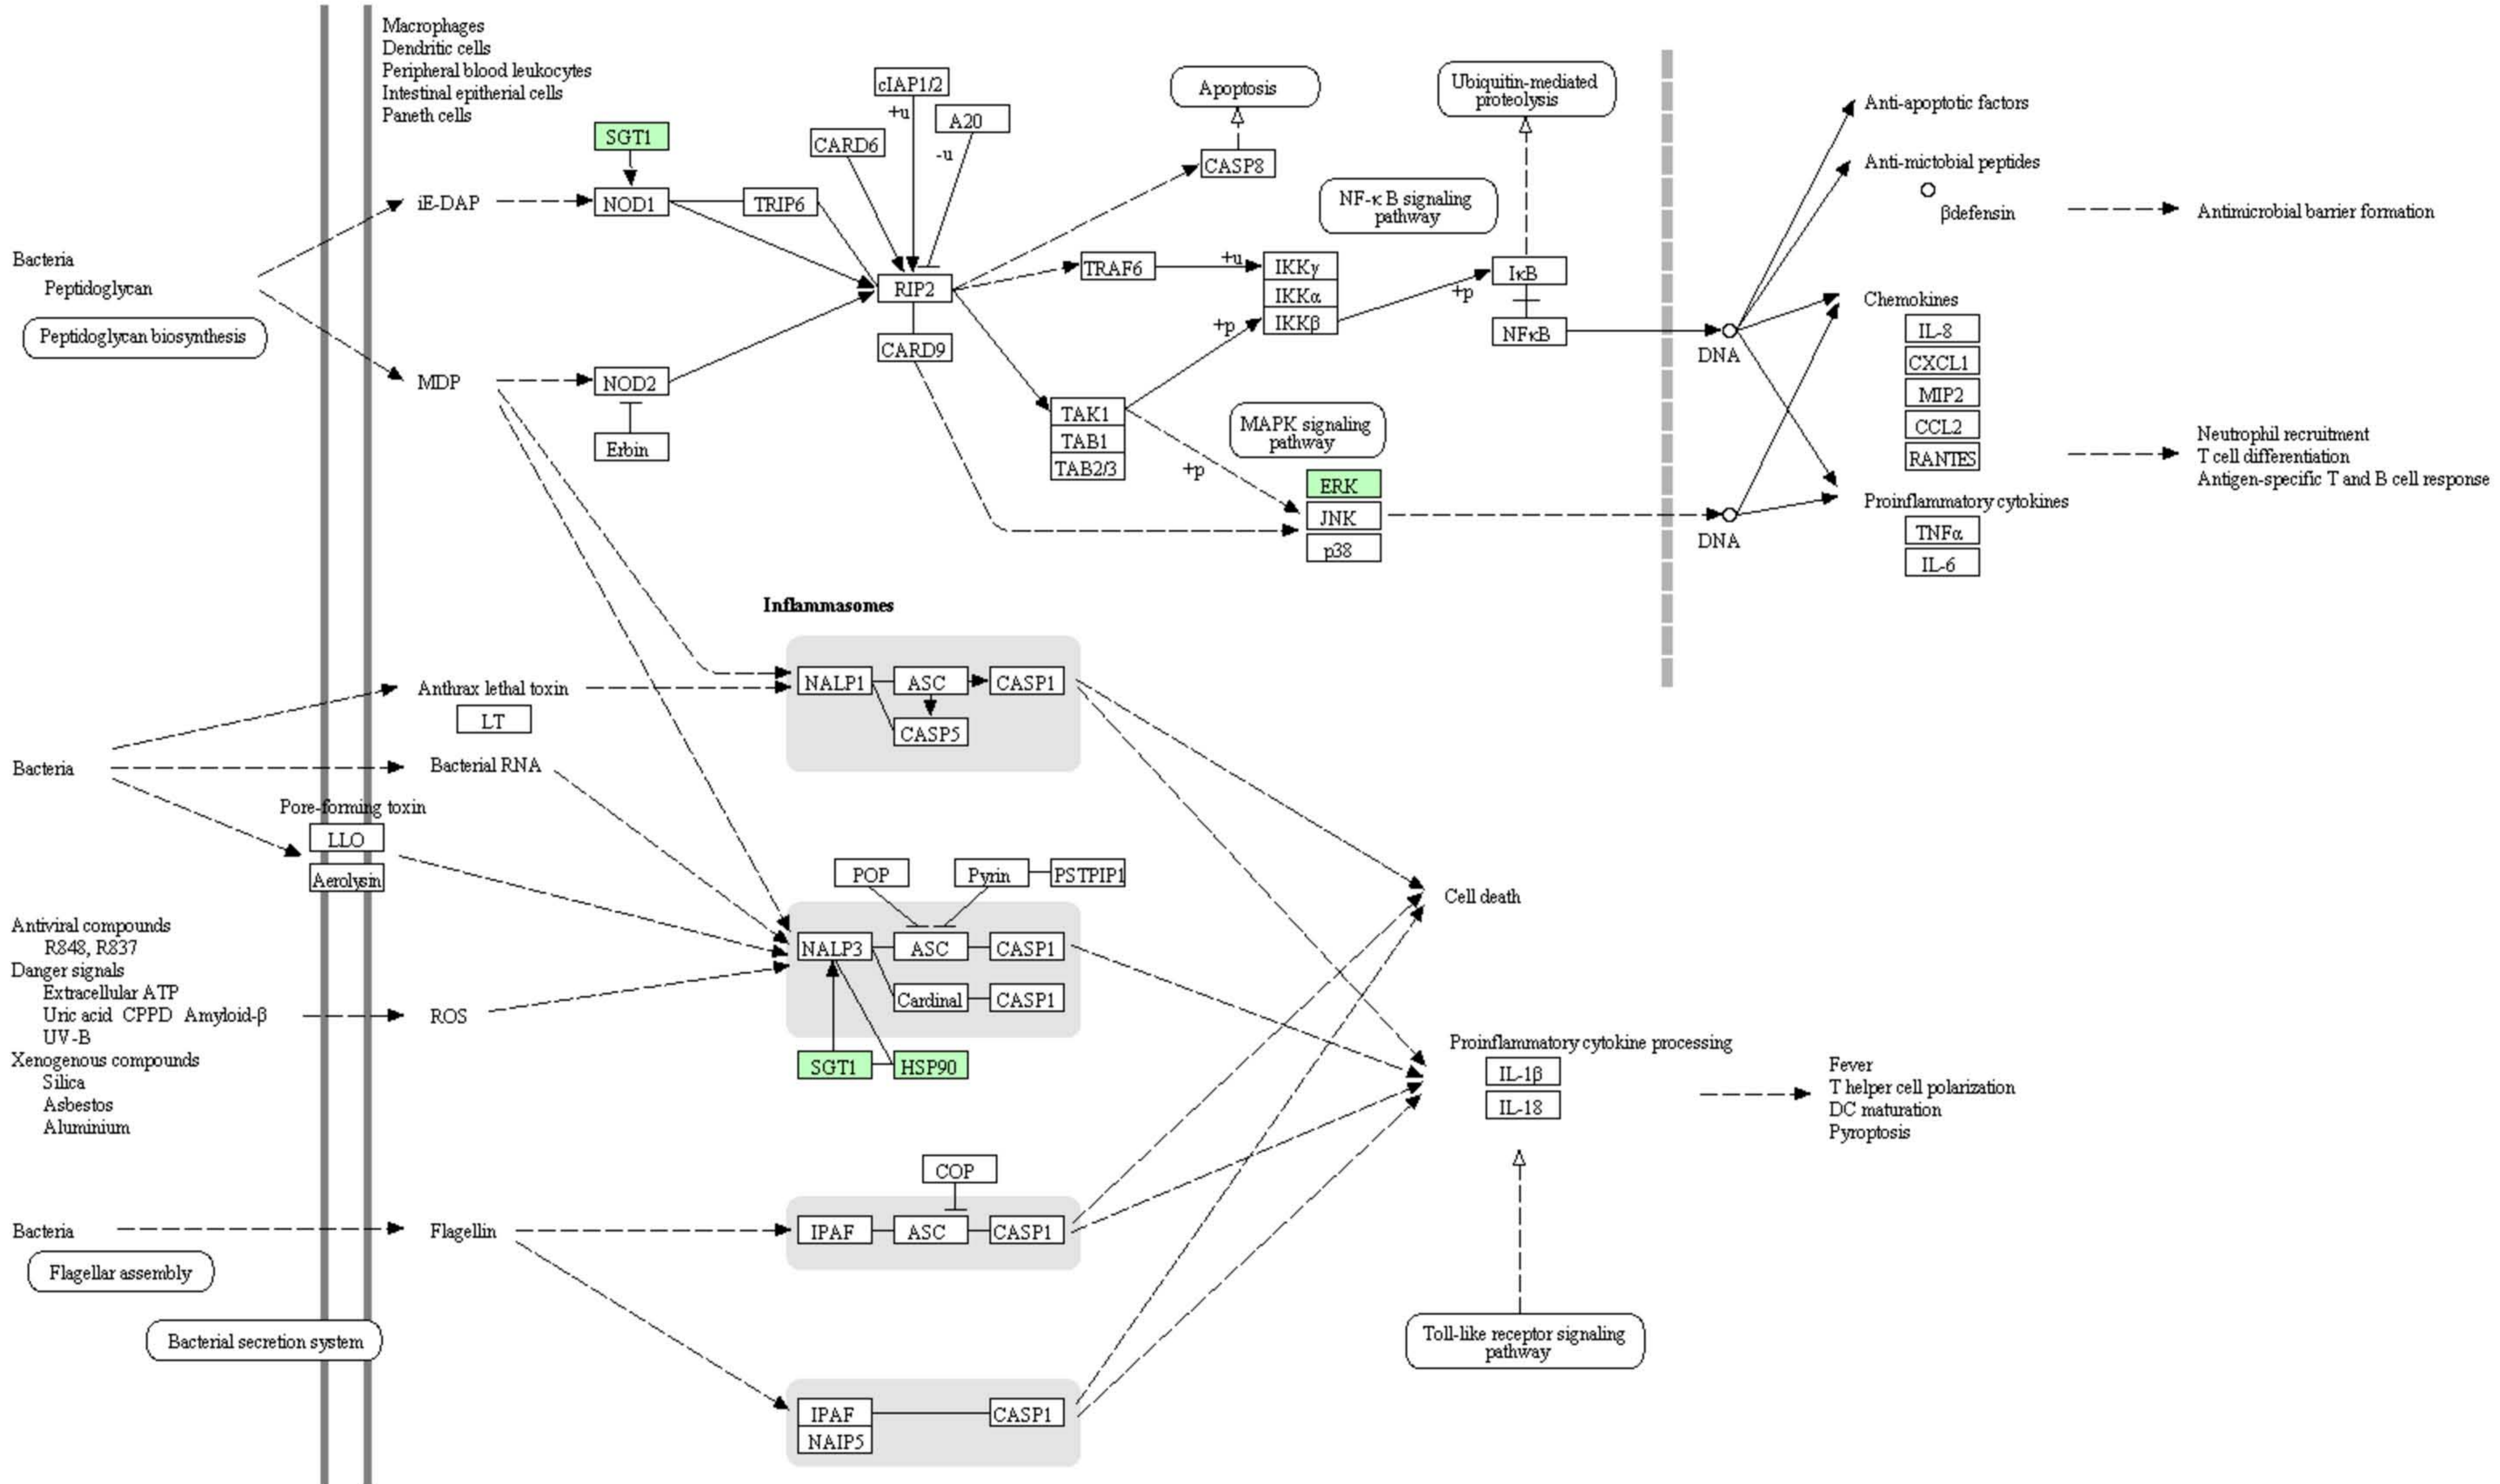



# NON-HOMOLOGOUS END-JOINING

## Prokaryotic type

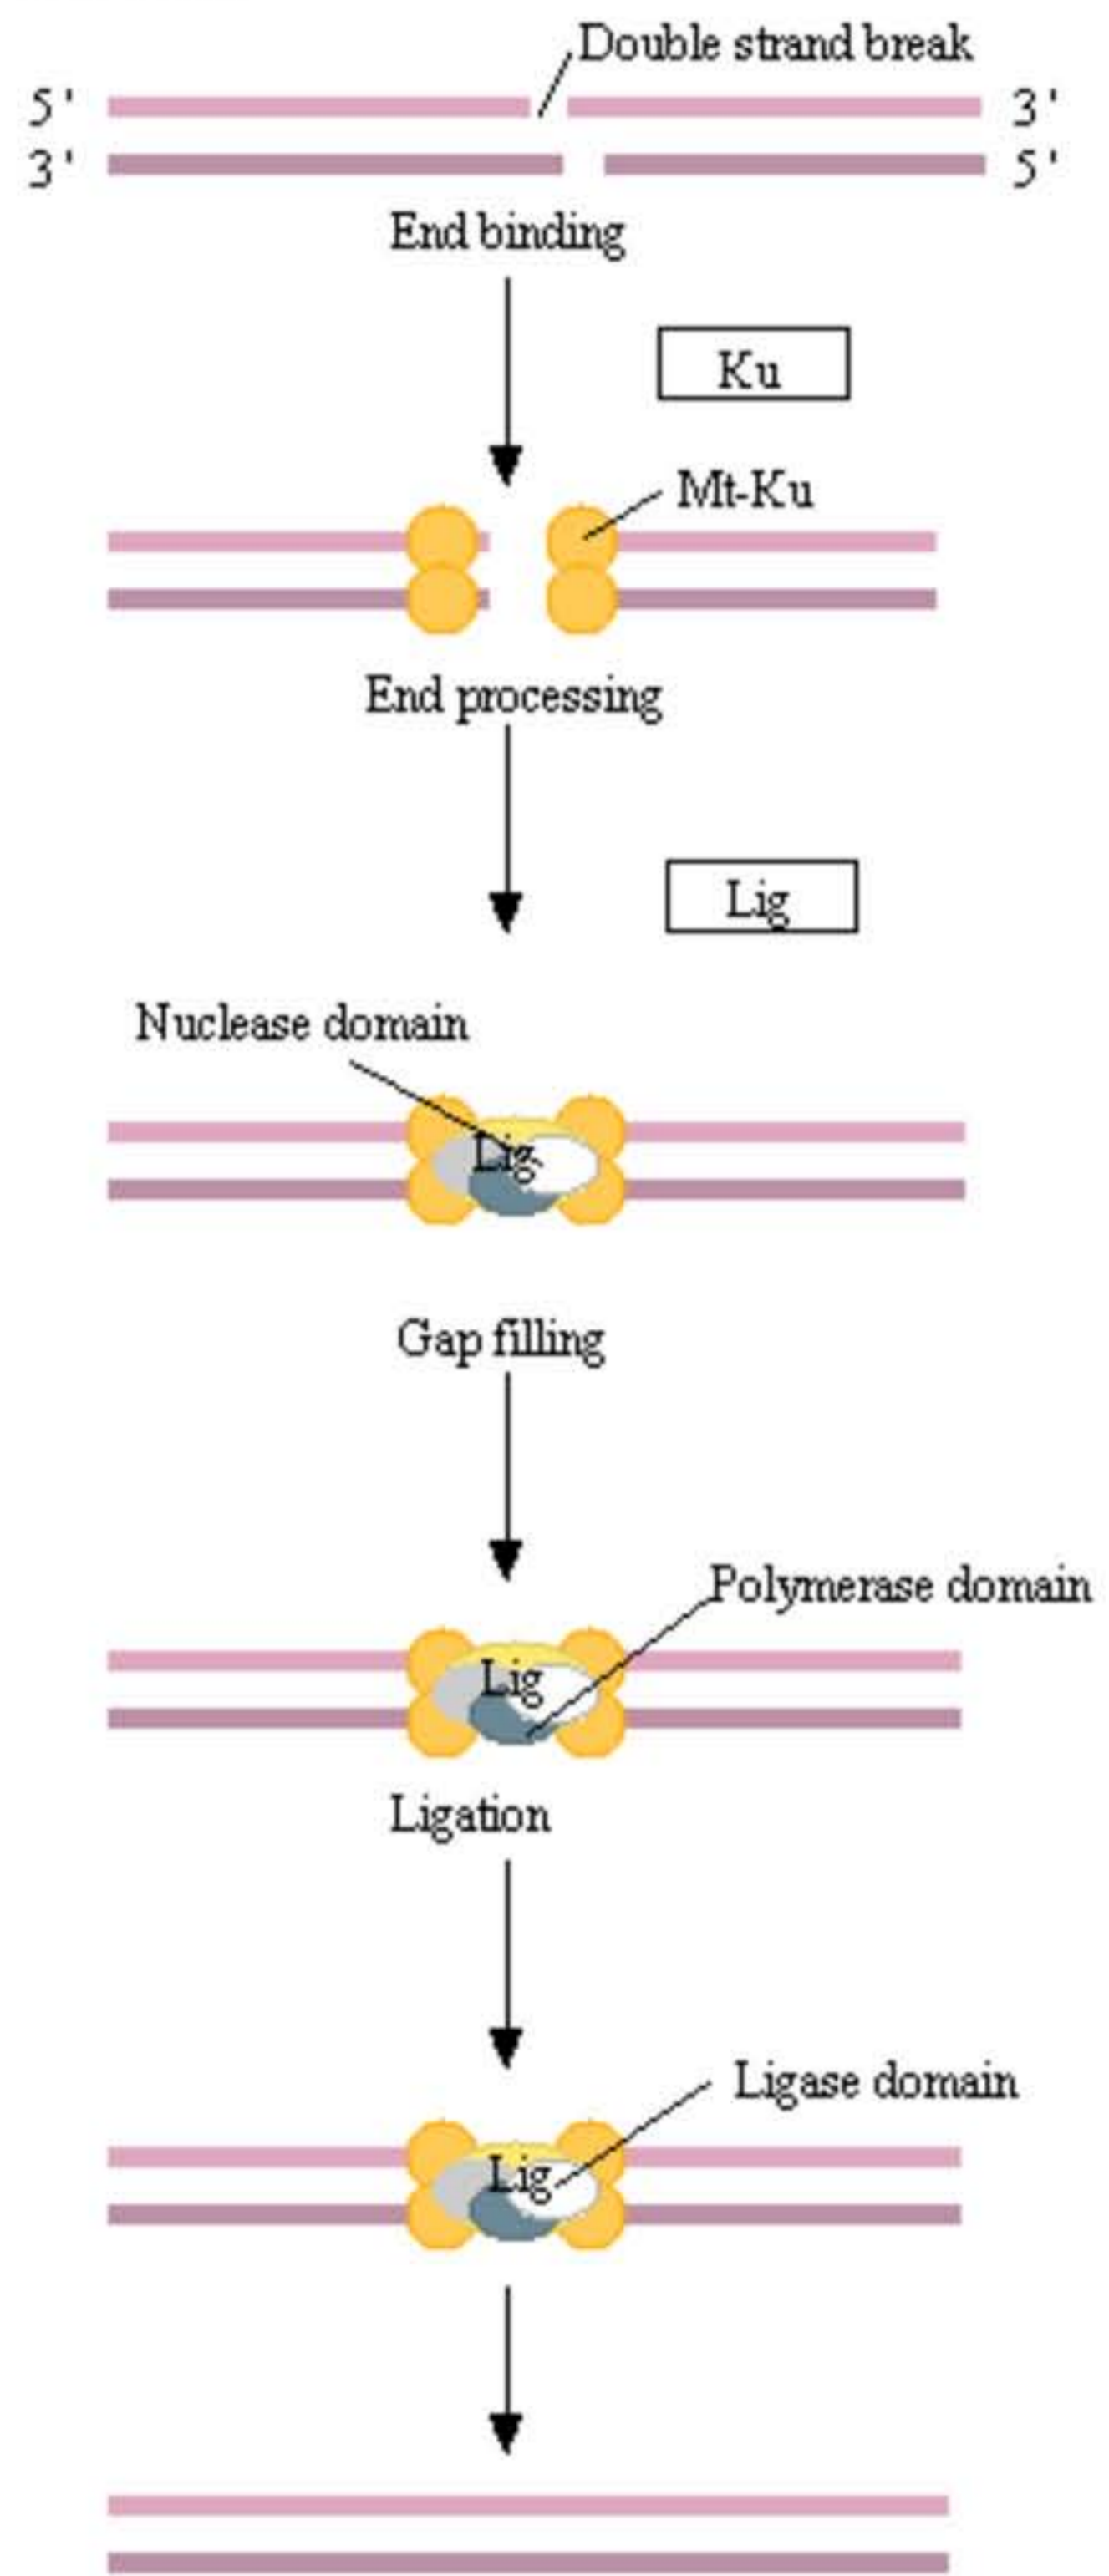

## Eukaryotic type

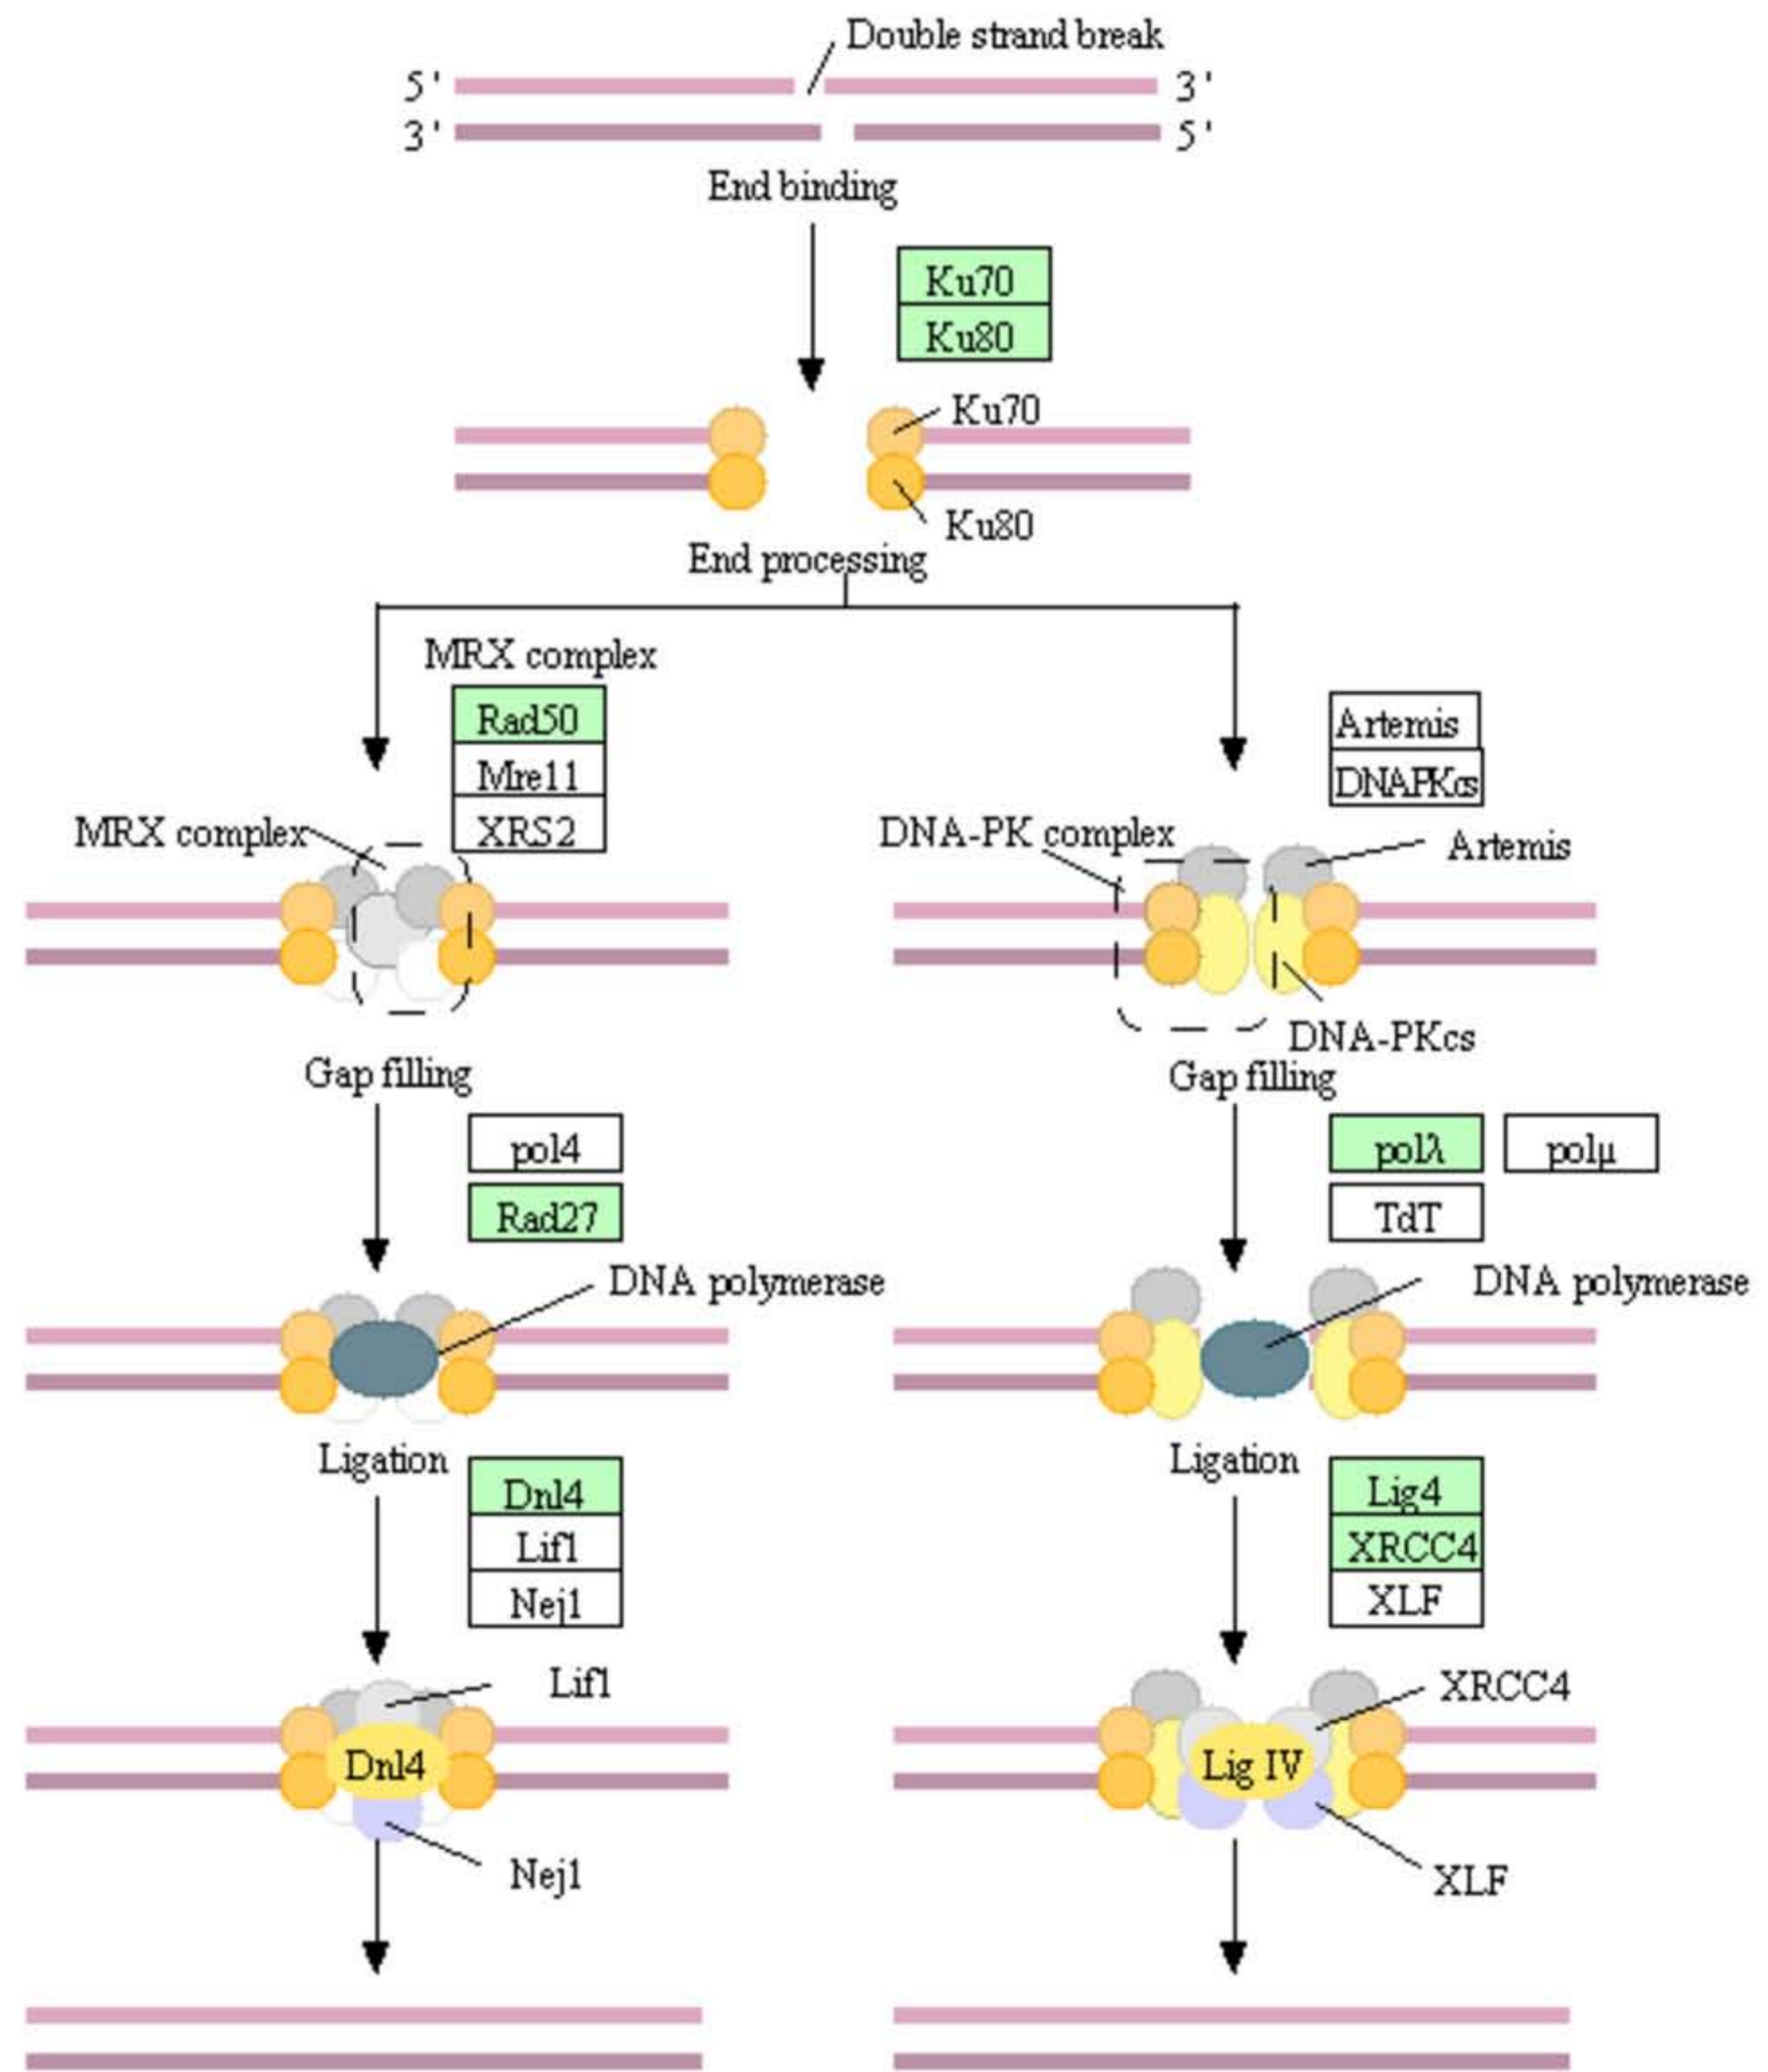

(*Saccharomyces cerevisiae*)

(Mammals)



# NOTCH SIGNALING PATHWAY

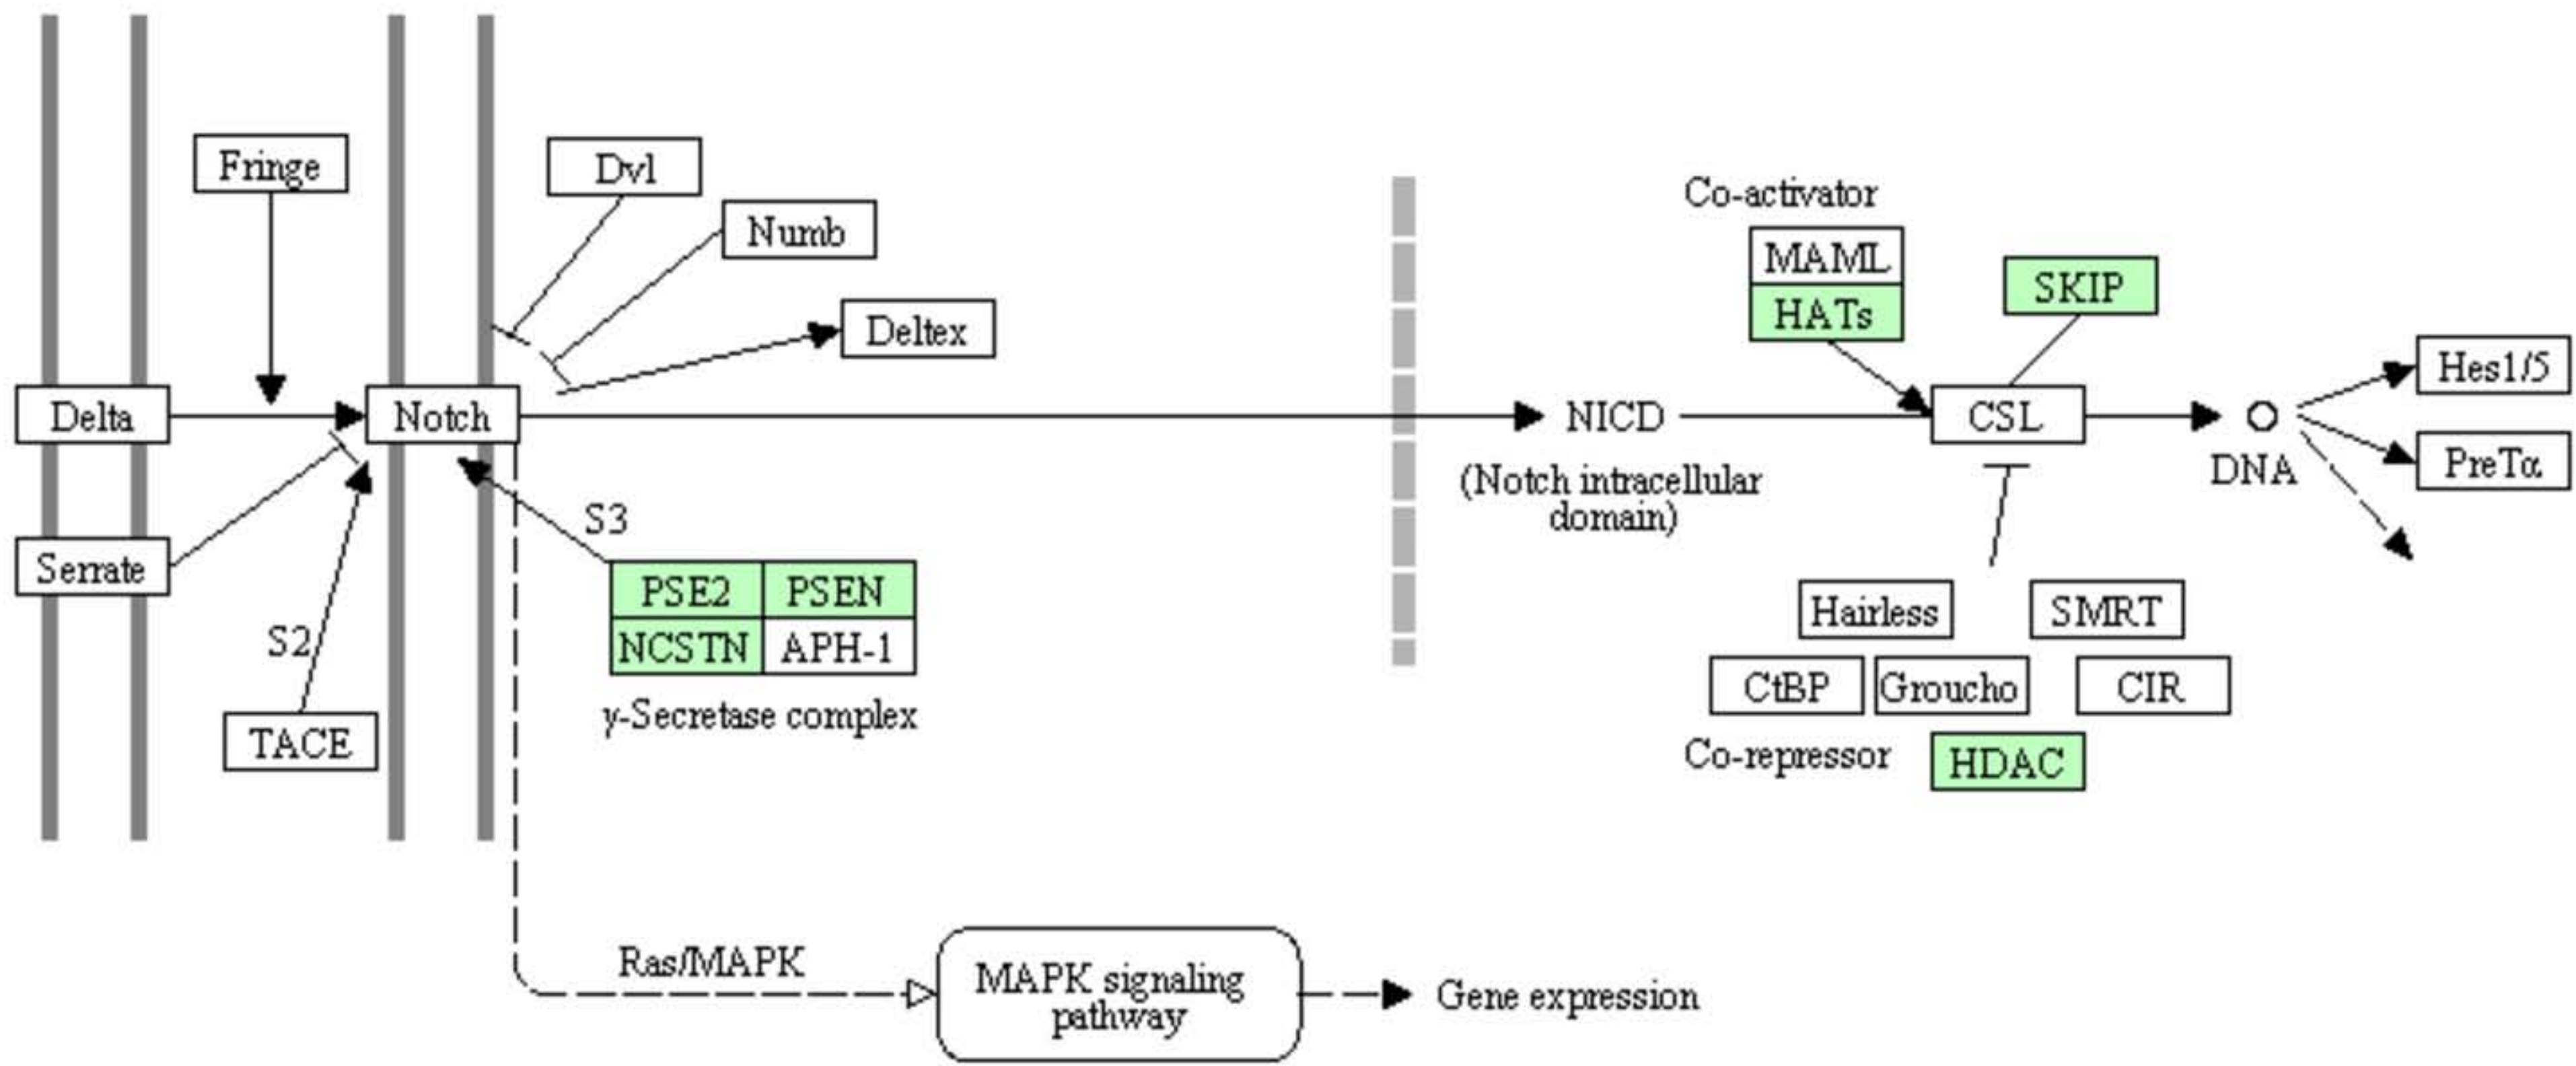



# NUCLEOTIDE EXCISION REPAIR

## Prokaryotic type

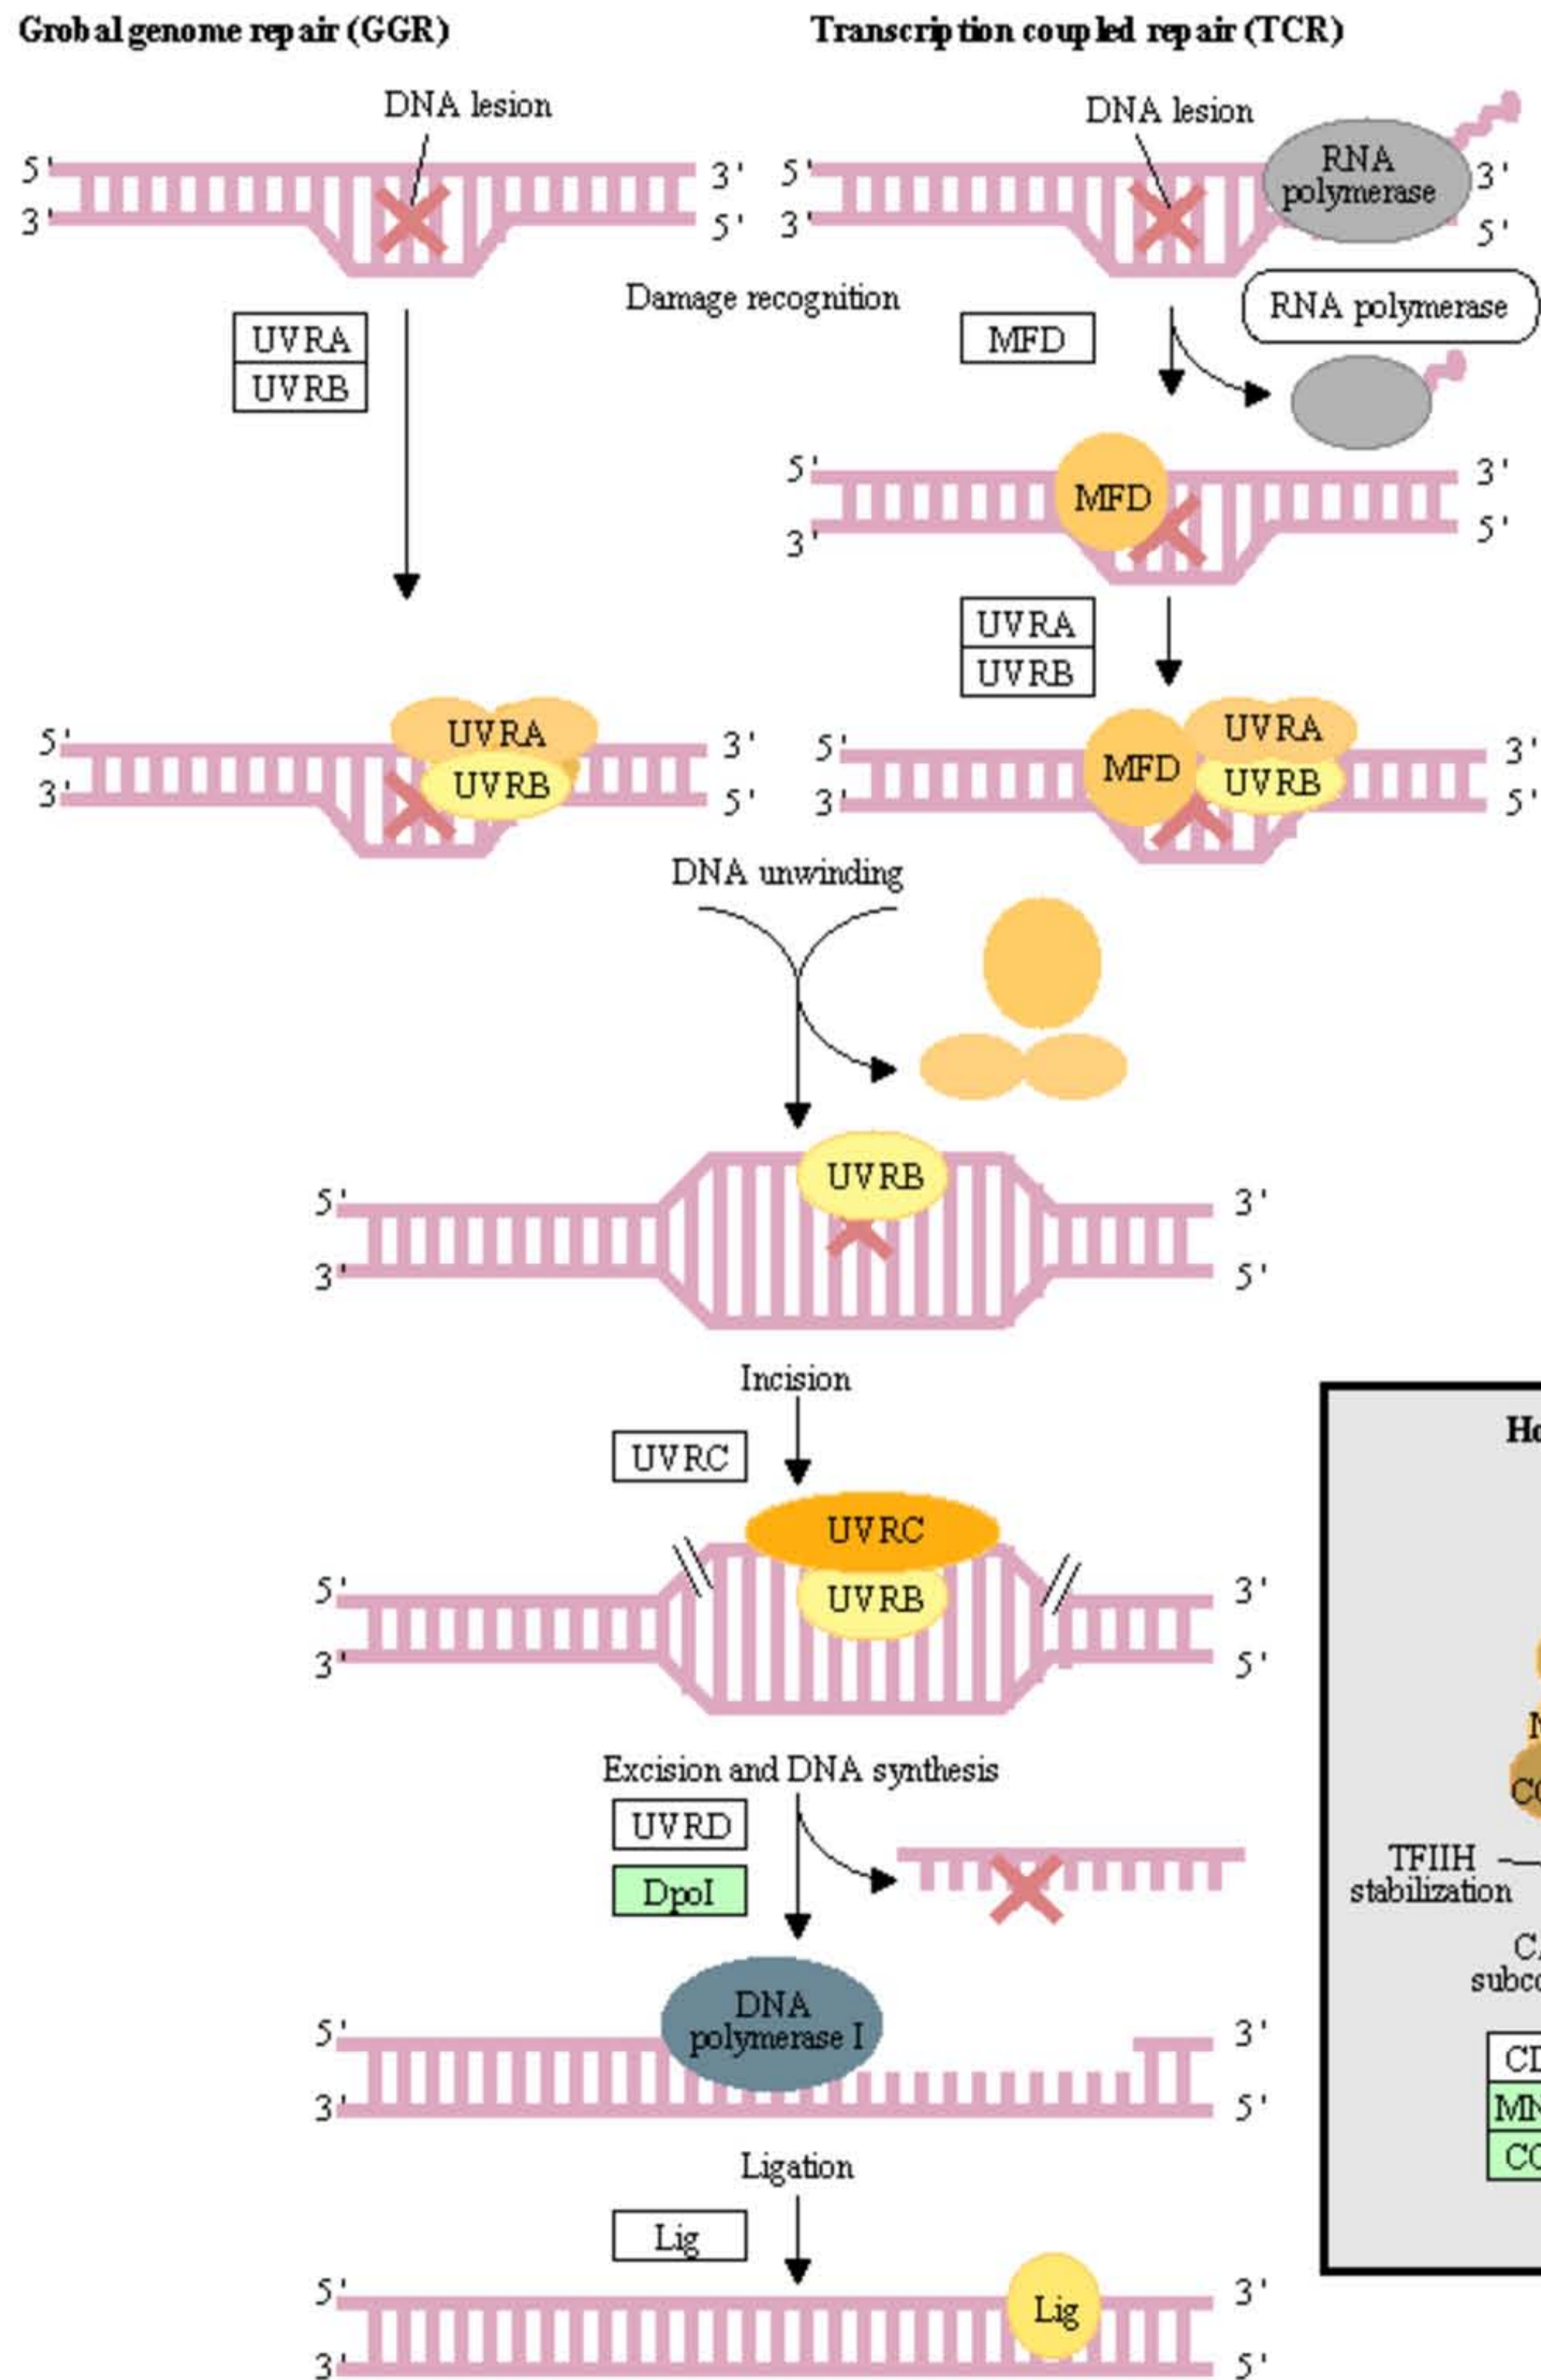

## Eukaryotic type

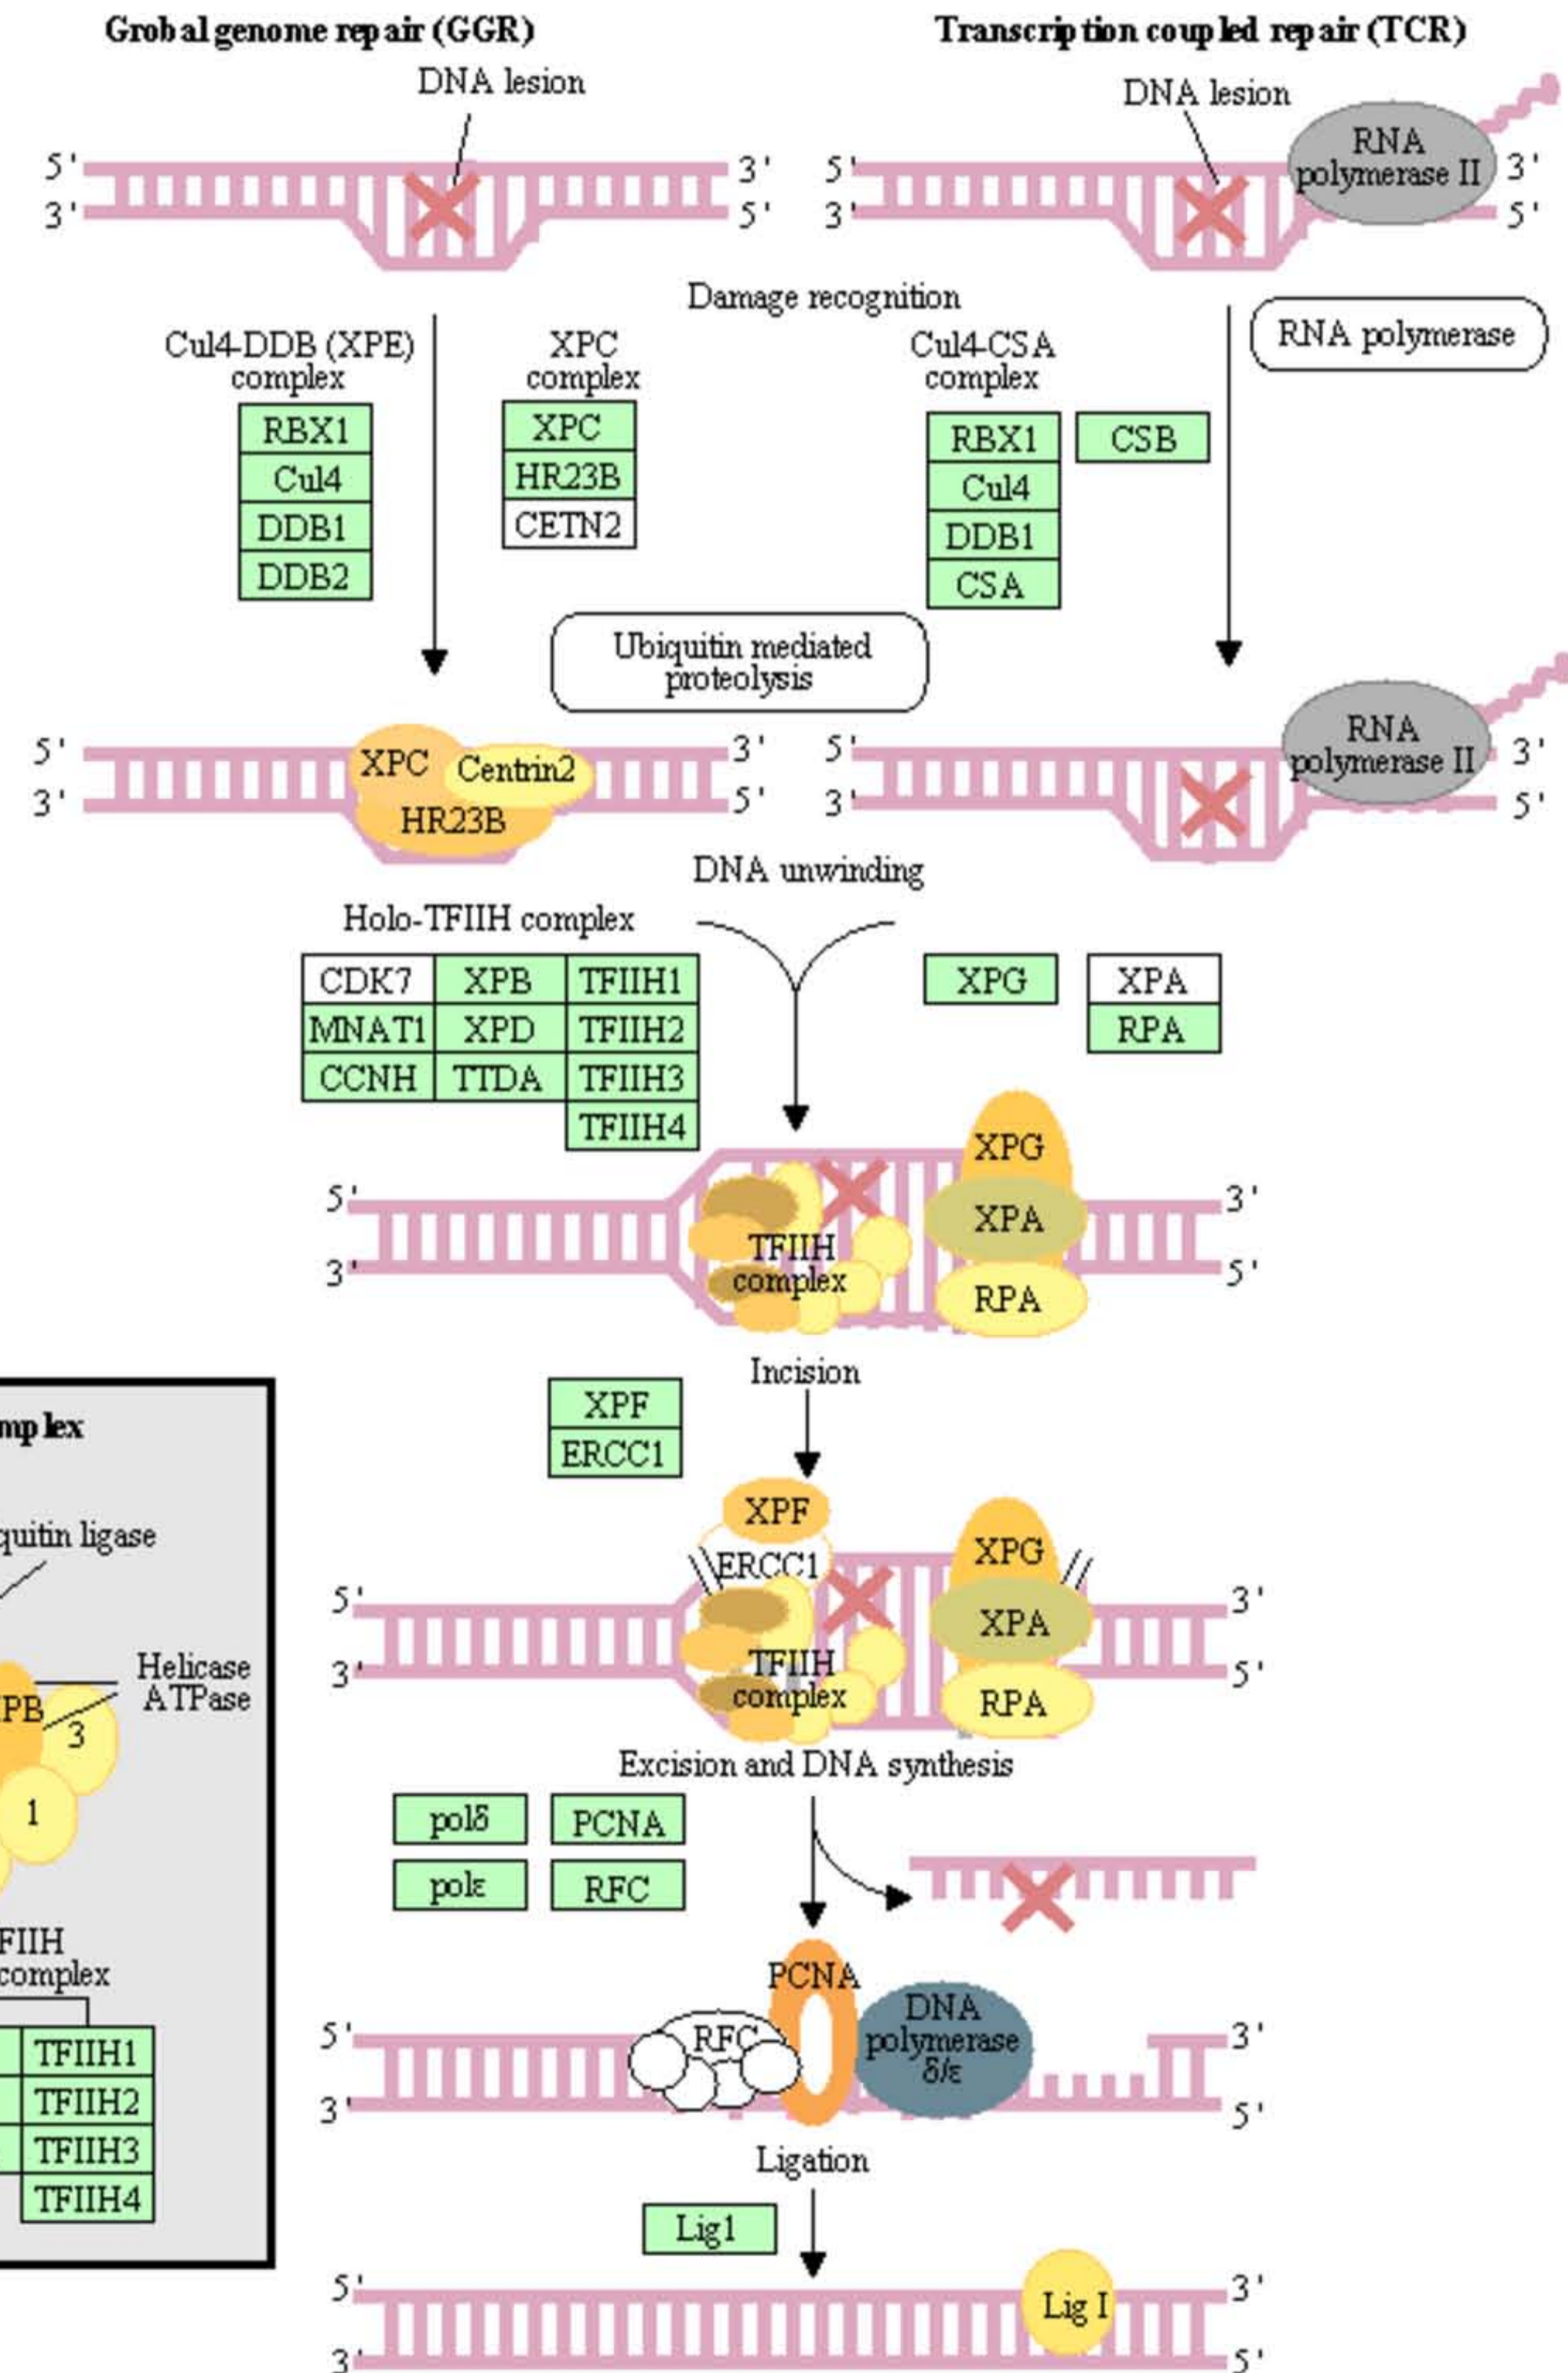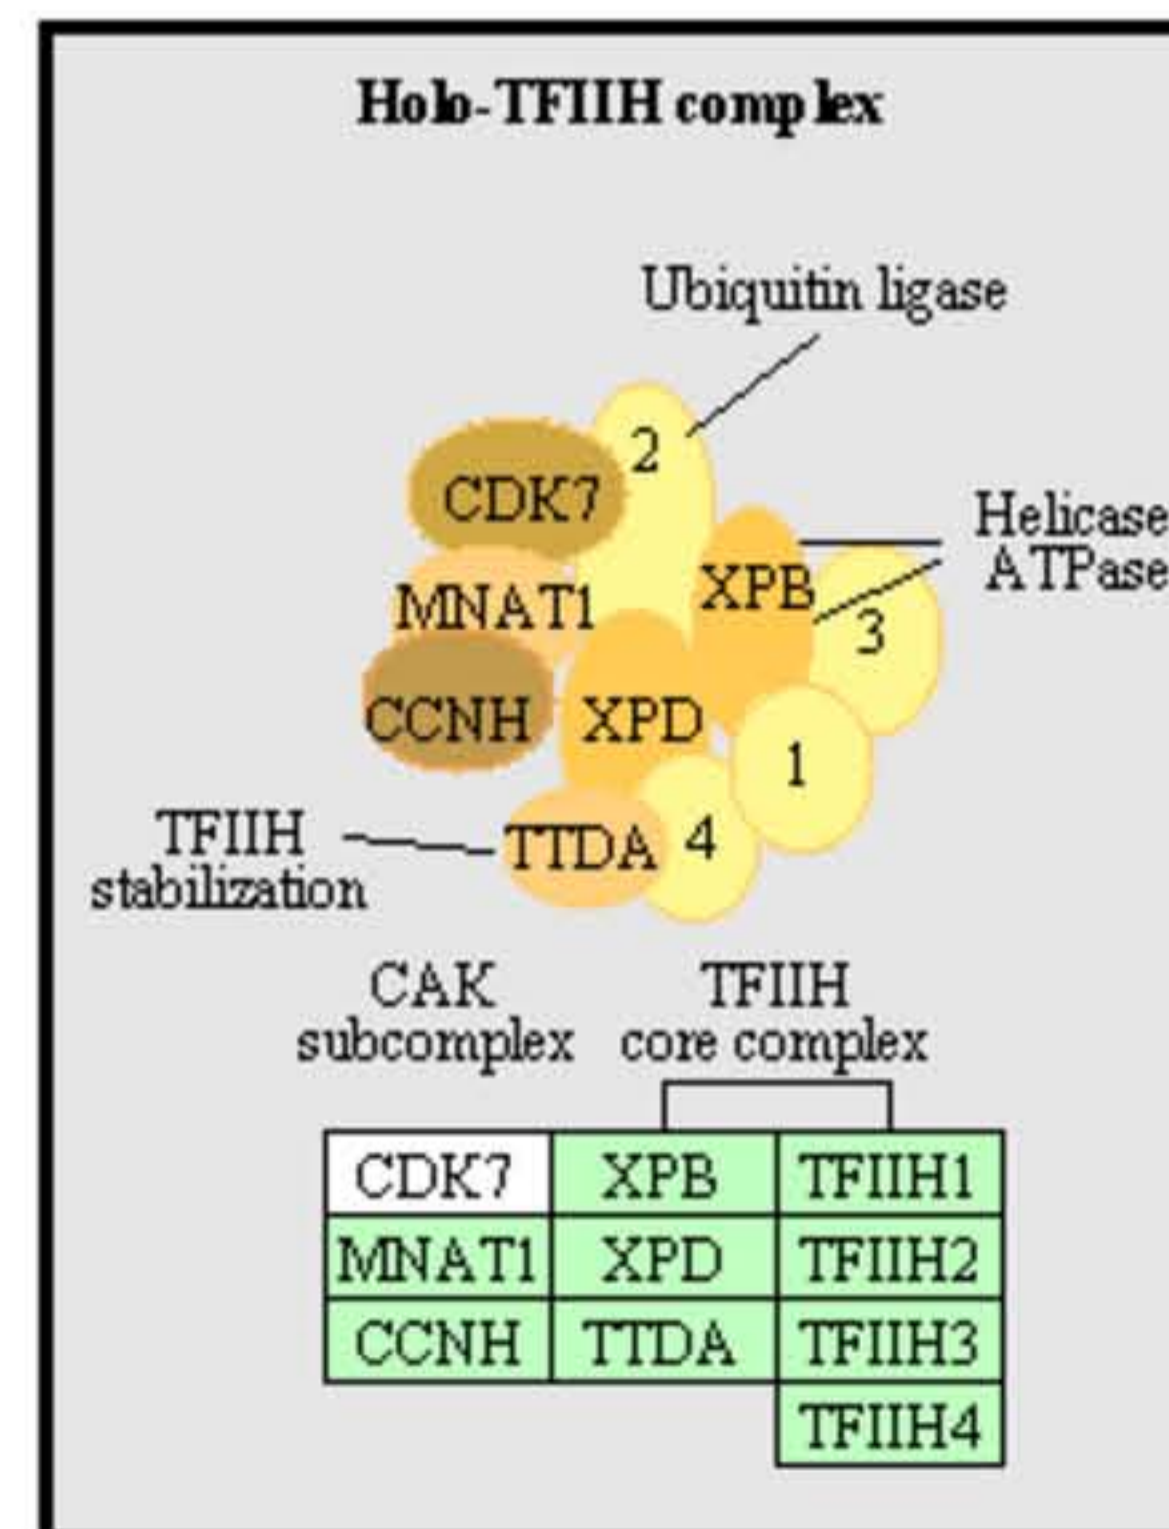



# ONE CARBON POOL BY FOLATE

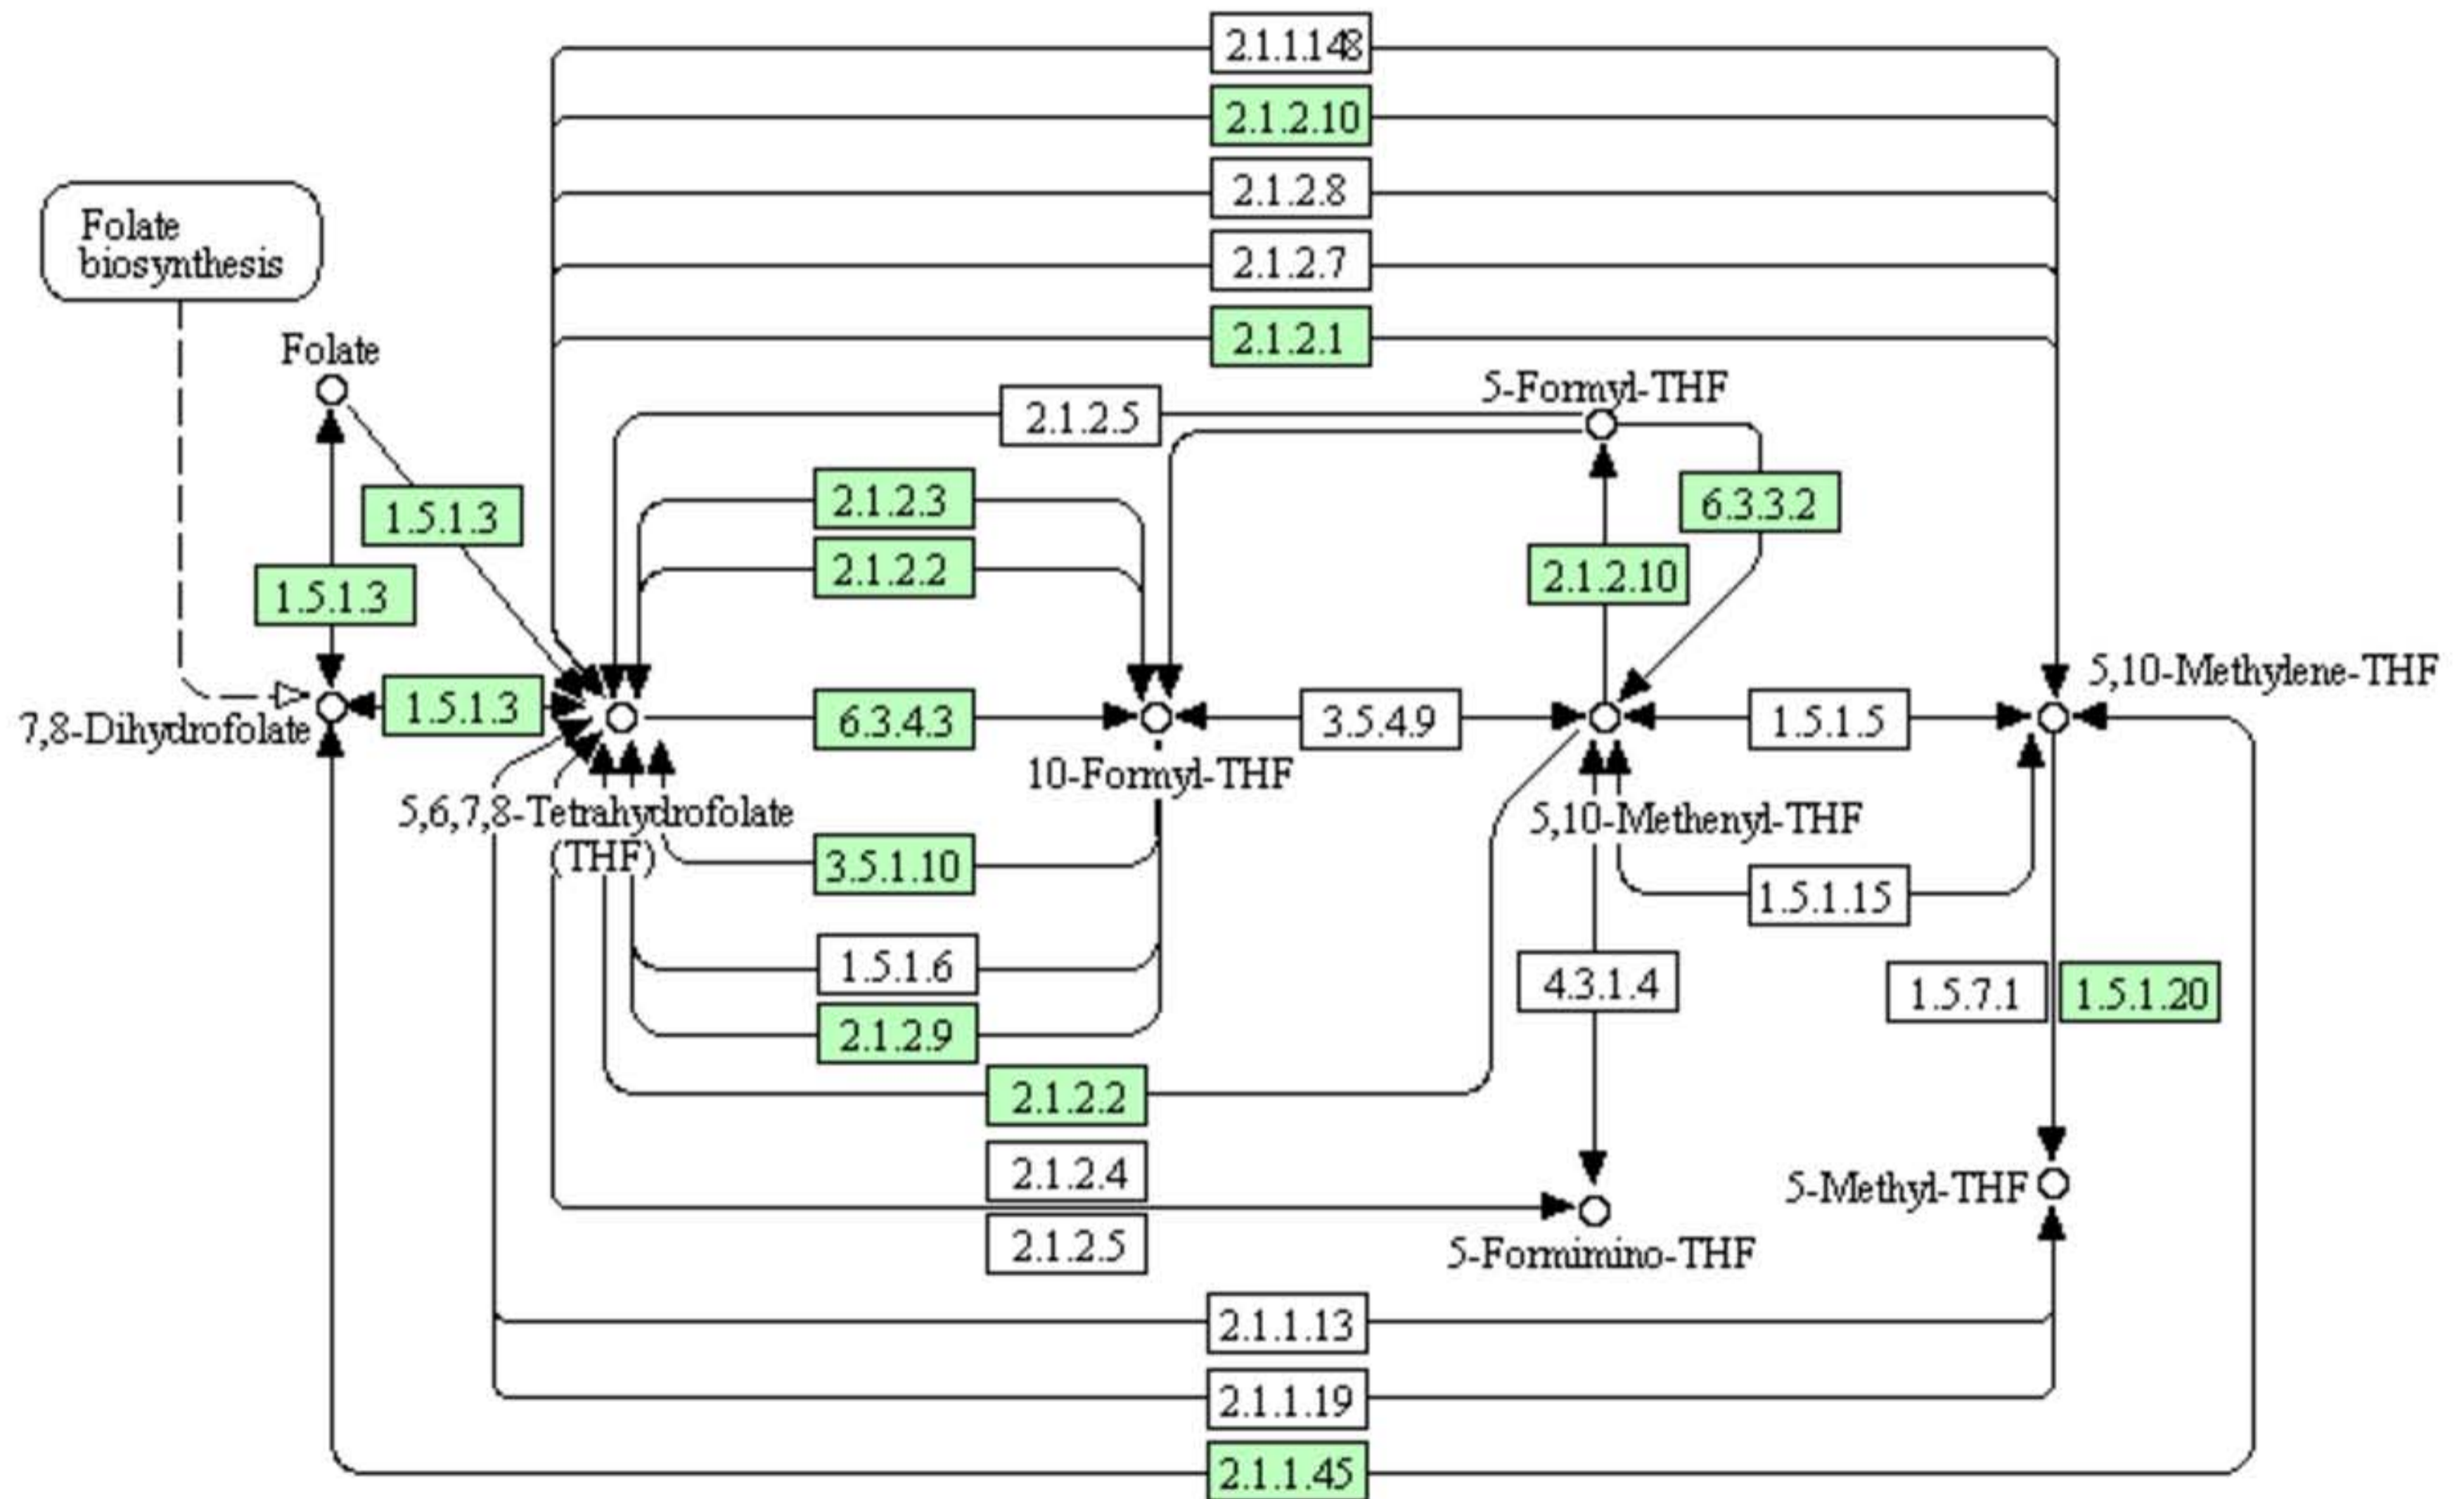



**OOCYTE MEIOSIS**

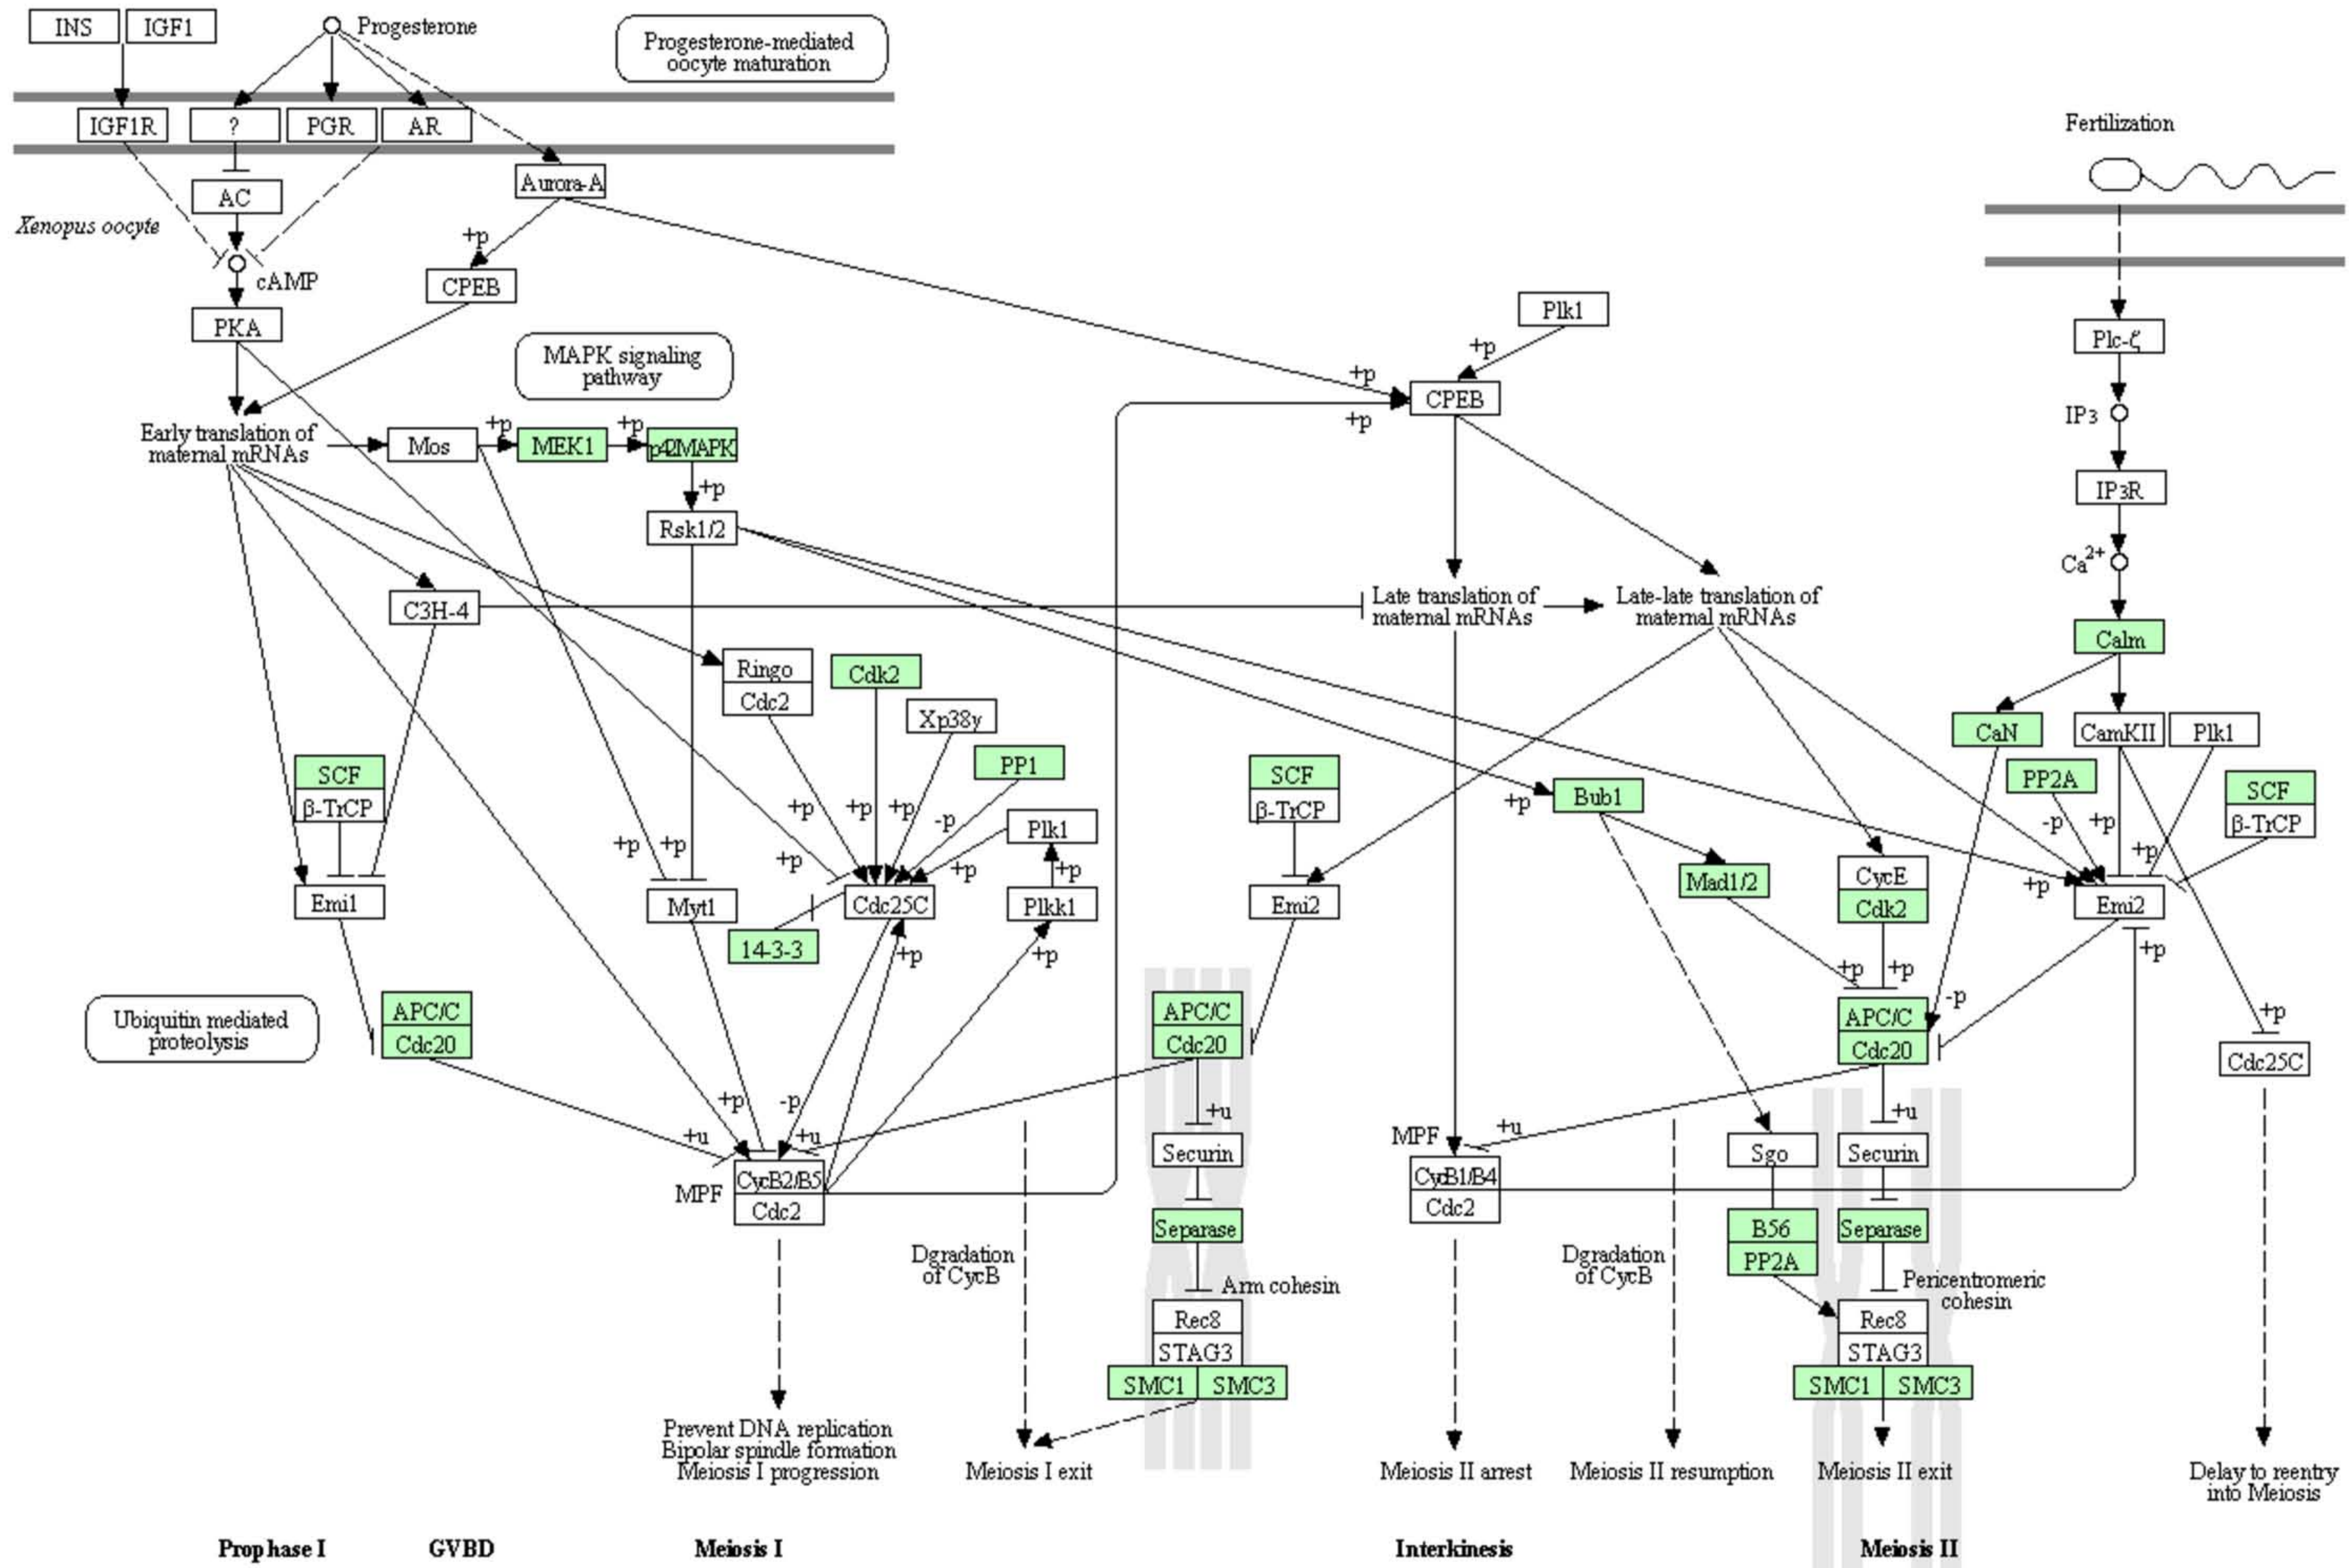



# OTHER GLYCAN DEGRADATION

## N-glycan

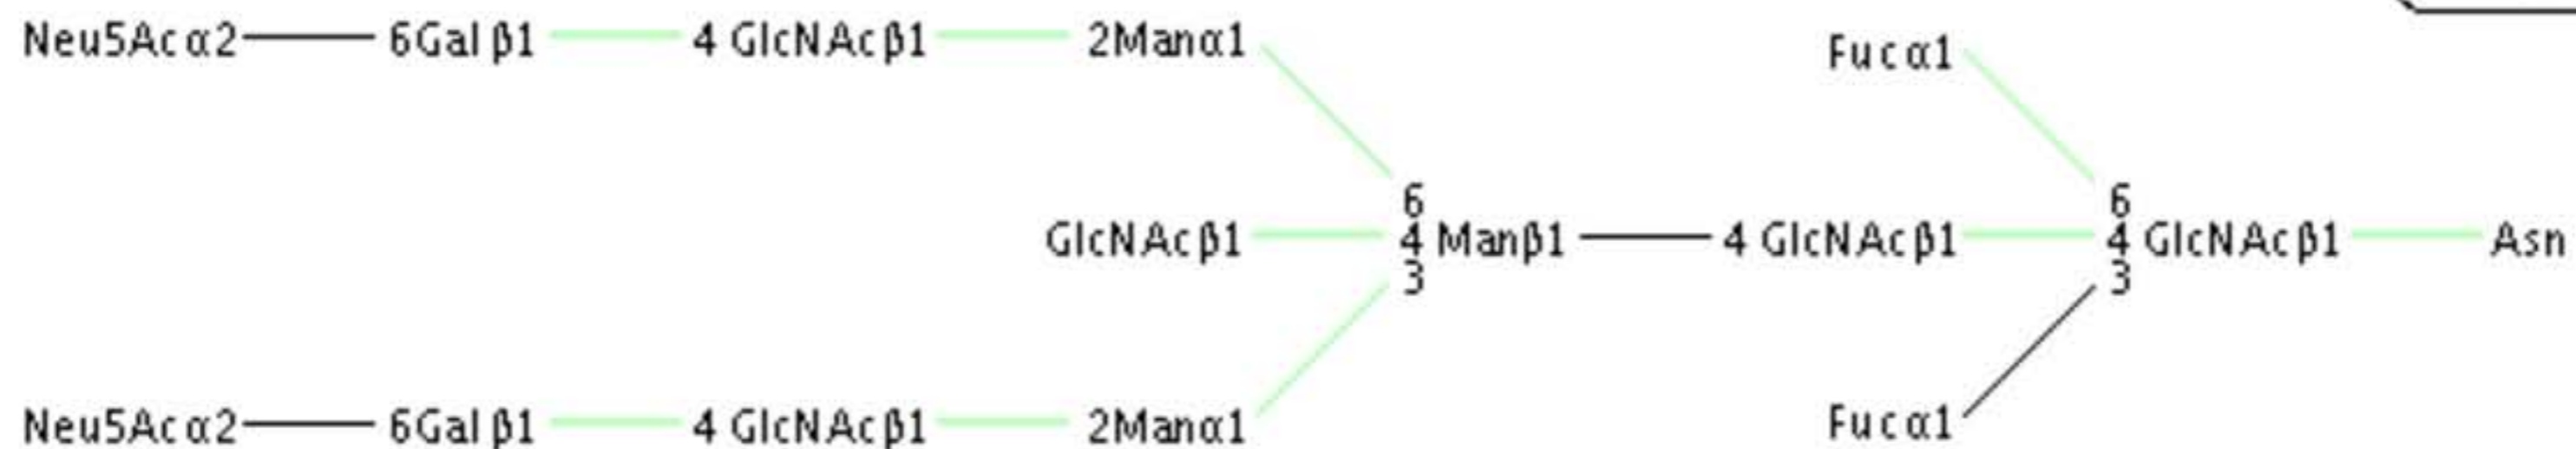

## Ganglioside

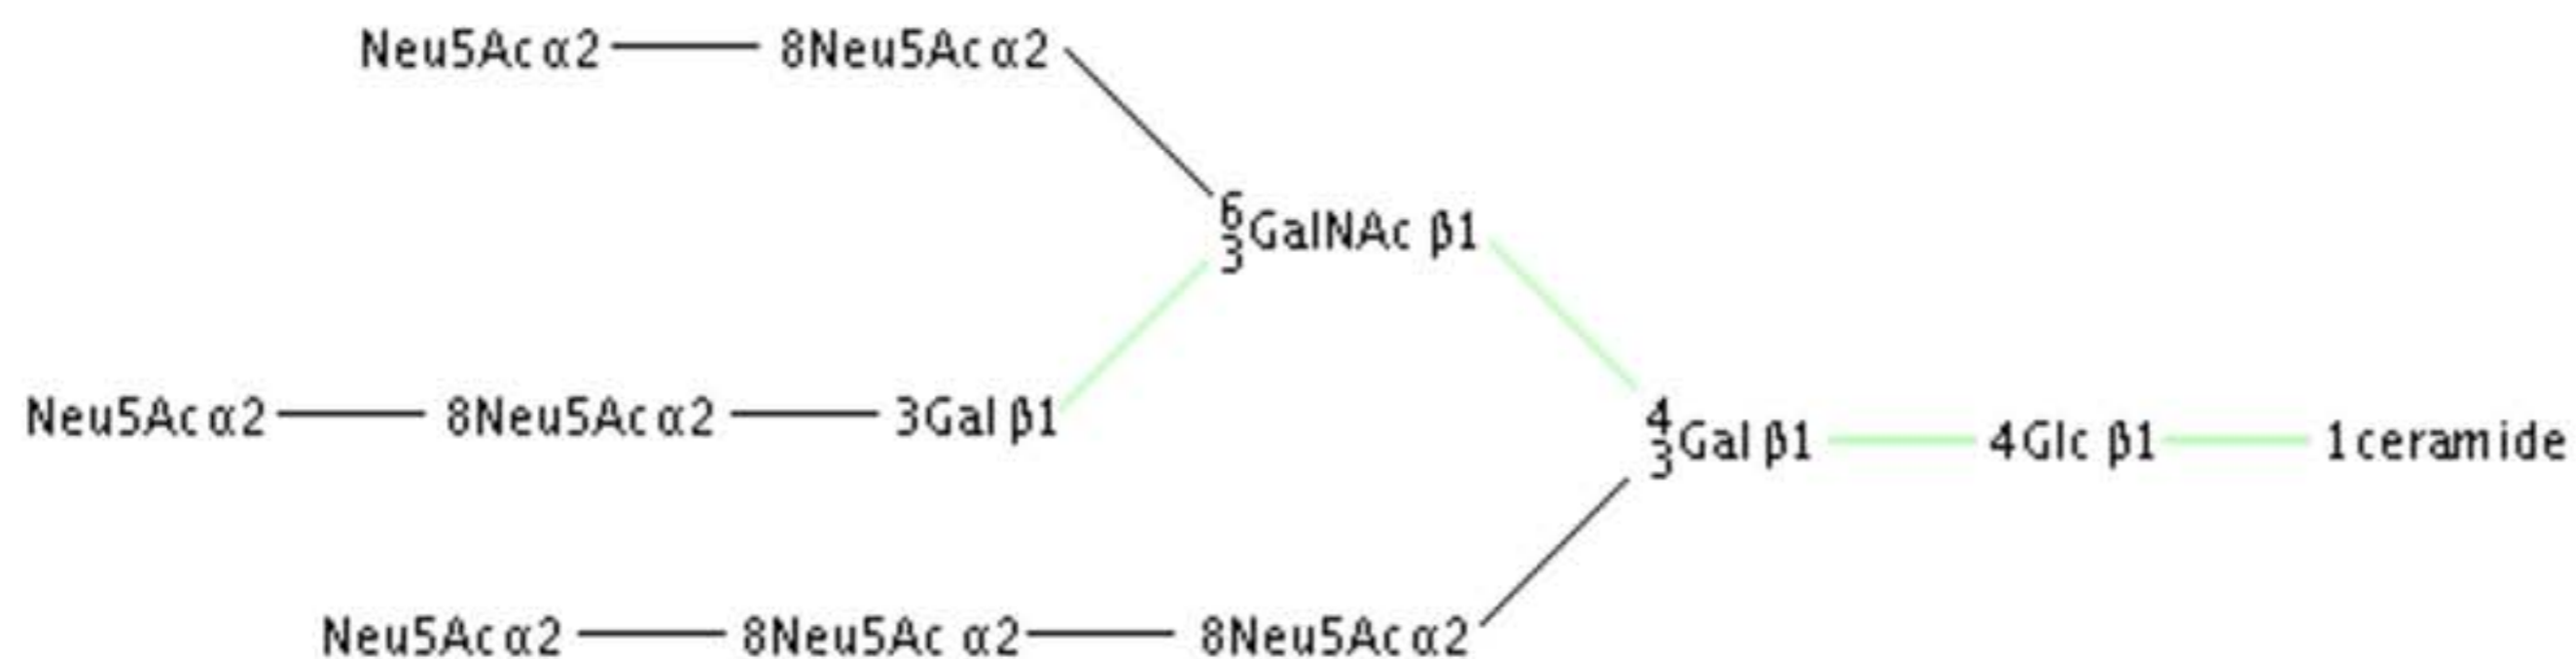



# OXIDATIVE PHOSPHORYLATION

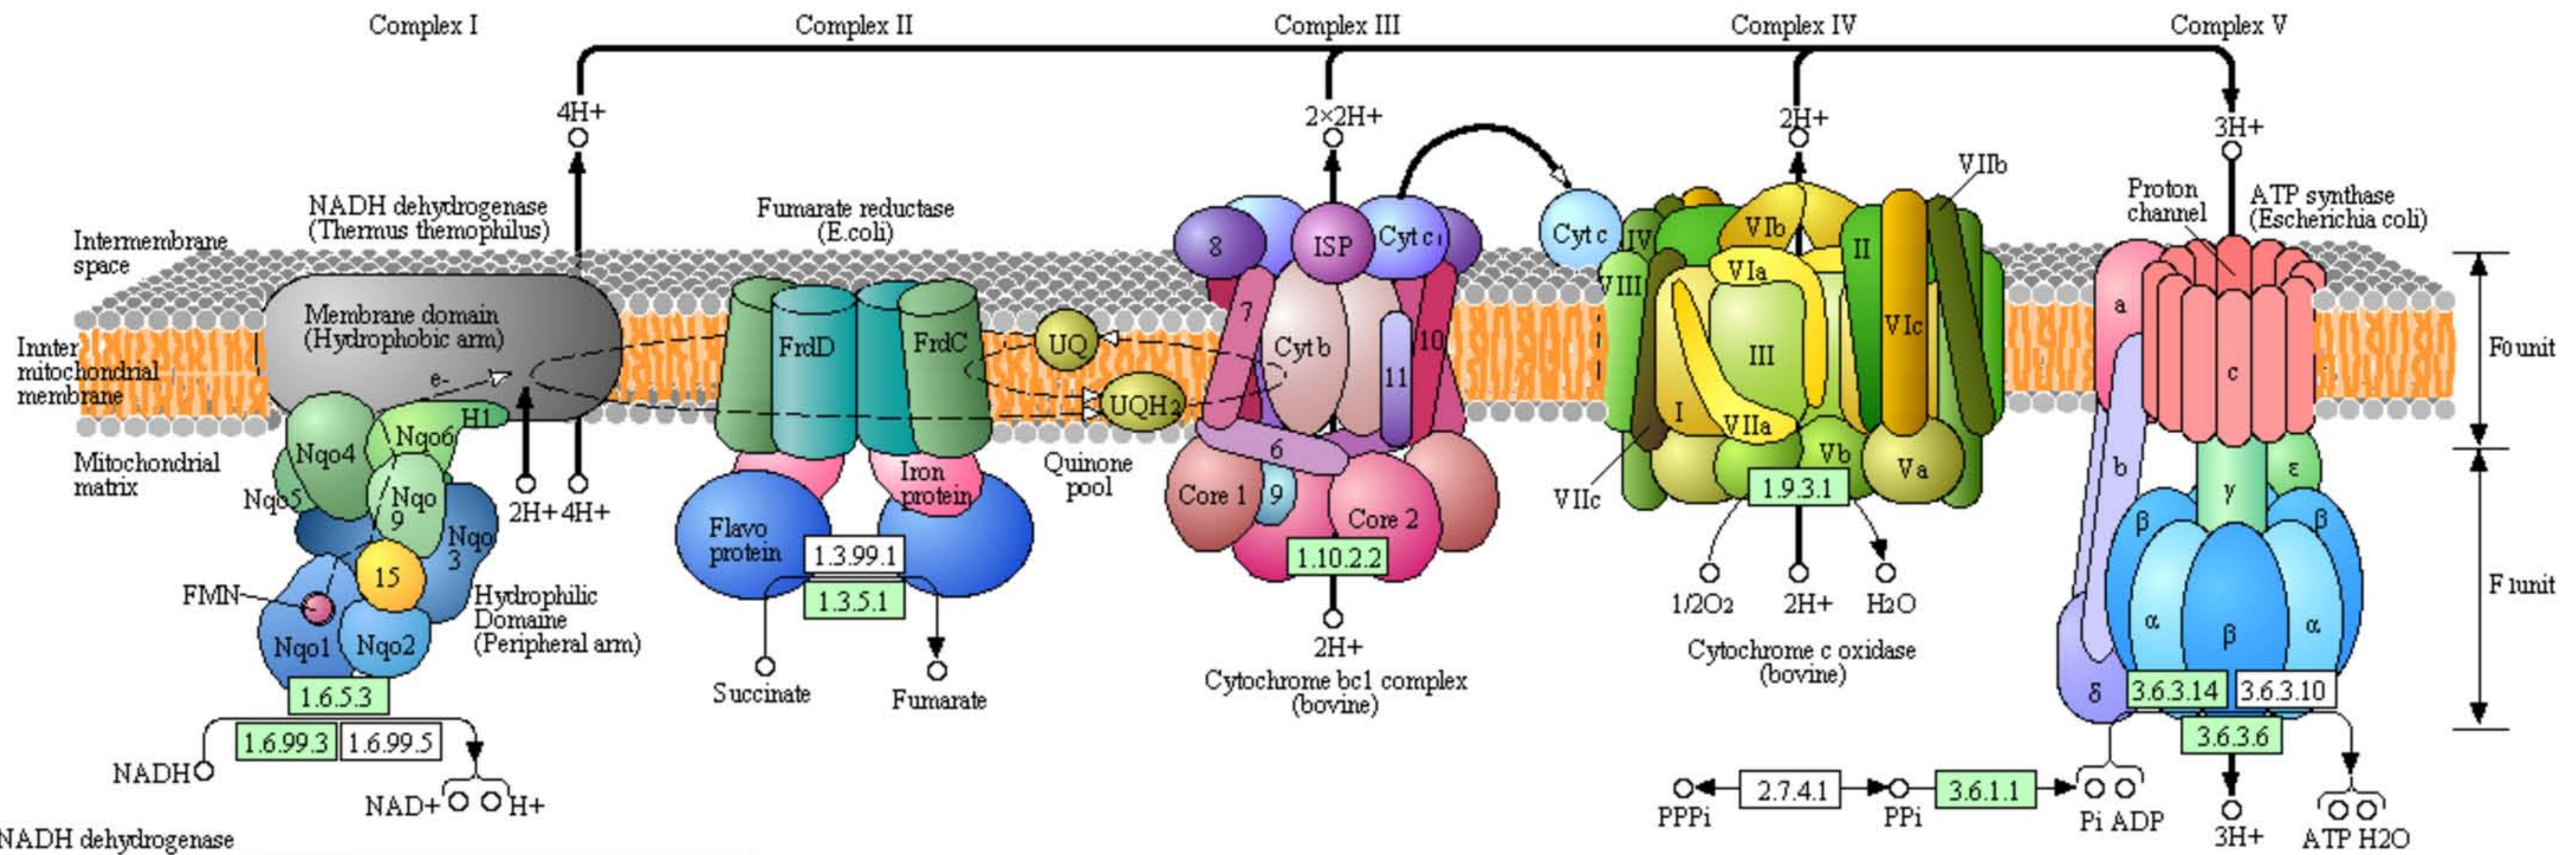

## NADH dehydrogenase

|     |        |        |        |        |        |        |        |        |        |         |         |         |         |         |      |      |      |
|-----|--------|--------|--------|--------|--------|--------|--------|--------|--------|---------|---------|---------|---------|---------|------|------|------|
| E   | ND1    | ND2    | ND3    | ND4    | ND4L   | ND5    | ND6    |        |        |         |         |         |         |         |      |      |      |
| E   | Ndufs1 | Ndufs2 | Ndufs3 | Ndufs4 | Ndufs5 | Ndufs6 | Ndufs7 | Ndufs8 | Ndufv1 | Ndufv2  | Ndufv3  |         |         |         |      |      |      |
| B/A | NuoA   | NuoB   | NuoC   | NuoD   | NuoE   | NuoF   | NuoG   | NuoH   | NuoI   | NuoJ    | NuoK    | NuoL    | NuoM    | NuoN    |      |      |      |
| B/A | NdhC   | NdhK   | NdhJ   | NdhH   | NdhA   | NdhI   | NdhG   | NdhE   | NdhF   | NdhD    | NdhB    | NdhL    | NdhM    | NdhN    | HoxE | HoxF | HoxU |
| E   | Ndufa1 | Ndufa2 | Ndufa3 | Ndufa4 | Ndufa5 | Ndufa6 | Ndufa7 | Ndufa8 | Ndufa9 | Ndufa10 | Ndufab1 | Ndufa11 | Ndufa12 | Ndufa13 |      |      |      |
| E   | Ndufb1 | Ndufb2 | Ndufb3 | Ndufb4 | Ndufb5 | Ndufb6 | Ndufb7 | Ndufb8 | Ndufb9 | Ndufb10 | Ndufb11 | Ndufc1  | Ndufc2  |         |      |      |      |

## Succinate dehydrogenase / Fumarate reductase

|     |      |      |      |      |      |      |      |      |
|-----|------|------|------|------|------|------|------|------|
| E   | SDHC | SDHD | SDHA | SDHB |      |      |      |      |
| B/A | SdhC | SdhD | SdhA | SdhB | FrdA | FrdB | FrdC | FrdD |

## Cytochrome c reductase

|       |      |       |       |      |      |      |       |  |
|-------|------|-------|-------|------|------|------|-------|--|
| E/B/A | ISP  | Cyt b | Cyt 1 |      |      |      |       |  |
| E     | COR1 | QCR2  | QCR6  | QCR7 | QCR8 | QCR9 | QCR10 |  |

## Cytochrome c oxidase

|     |       |      |      |      |      |       |       |       |       |       |       |       |       |       |       |       |       |       |
|-----|-------|------|------|------|------|-------|-------|-------|-------|-------|-------|-------|-------|-------|-------|-------|-------|-------|
| E   | COX10 | COX3 | COX1 | COX2 | COX4 | COX5A | COX5B | COX6A | COX6B | COX6C | COX7A | COX7B | COX7C | COX8  | E/B/A | COX11 | COX15 | COX17 |
| B/A | CyoE  | CyoD | CyoC | CyoB | CyoA |       |       |       |       |       |       |       |       | COX11 | COX15 | COX17 |       |       |
|     | CoxD  | CoxC | CoxA | CoxB |      |       |       |       |       |       |       |       |       |       |       |       |       |       |
|     | QoxD  | QoxC | QoxB | QoxA |      |       |       |       |       |       |       |       |       |       |       |       |       |       |

## Cytochrome c oxidase, cbb3-type

|   |   |    |    |     |
|---|---|----|----|-----|
| B | I | II | IV | III |
|---|---|----|----|-----|

## Cytochrome bd complex

|     |      |      |
|-----|------|------|
| B/A | CydA | CydB |
|-----|------|------|

## F-type ATPase (Bacteria)

|      |       |       |       |         |   |   |   |
|------|-------|-------|-------|---------|---|---|---|
| beta | alpha | gamma | delta | epsilon | c | a | b |
|------|-------|-------|-------|---------|---|---|---|

## F-type ATPase (Eukaryotes)

|      |       |       |      |       |         |   |   |
|------|-------|-------|------|-------|---------|---|---|
| beta | alpha | gamma | OSCP | delta | epsilon | c | a |
| b    | e     | f6    | f    | 8     |         |   |   |
| d    | f     | h     | j    | k     | g       |   |   |

## V-type ATPase (Prokaryotes)

|   |   |   |   |   |   |   |   |
|---|---|---|---|---|---|---|---|
| A | B | C | D | E | F | I | K |
|---|---|---|---|---|---|---|---|

## V-type ATPase (Eukaryotes)

|   |      |      |    |       |   |   |   |
|---|------|------|----|-------|---|---|---|
| A | B    | C    | D  | E     | F | G | H |
| I | AC39 | 54kD | S1 | lipid |   |   |   |



# P53 SIGNALING PATHWAY

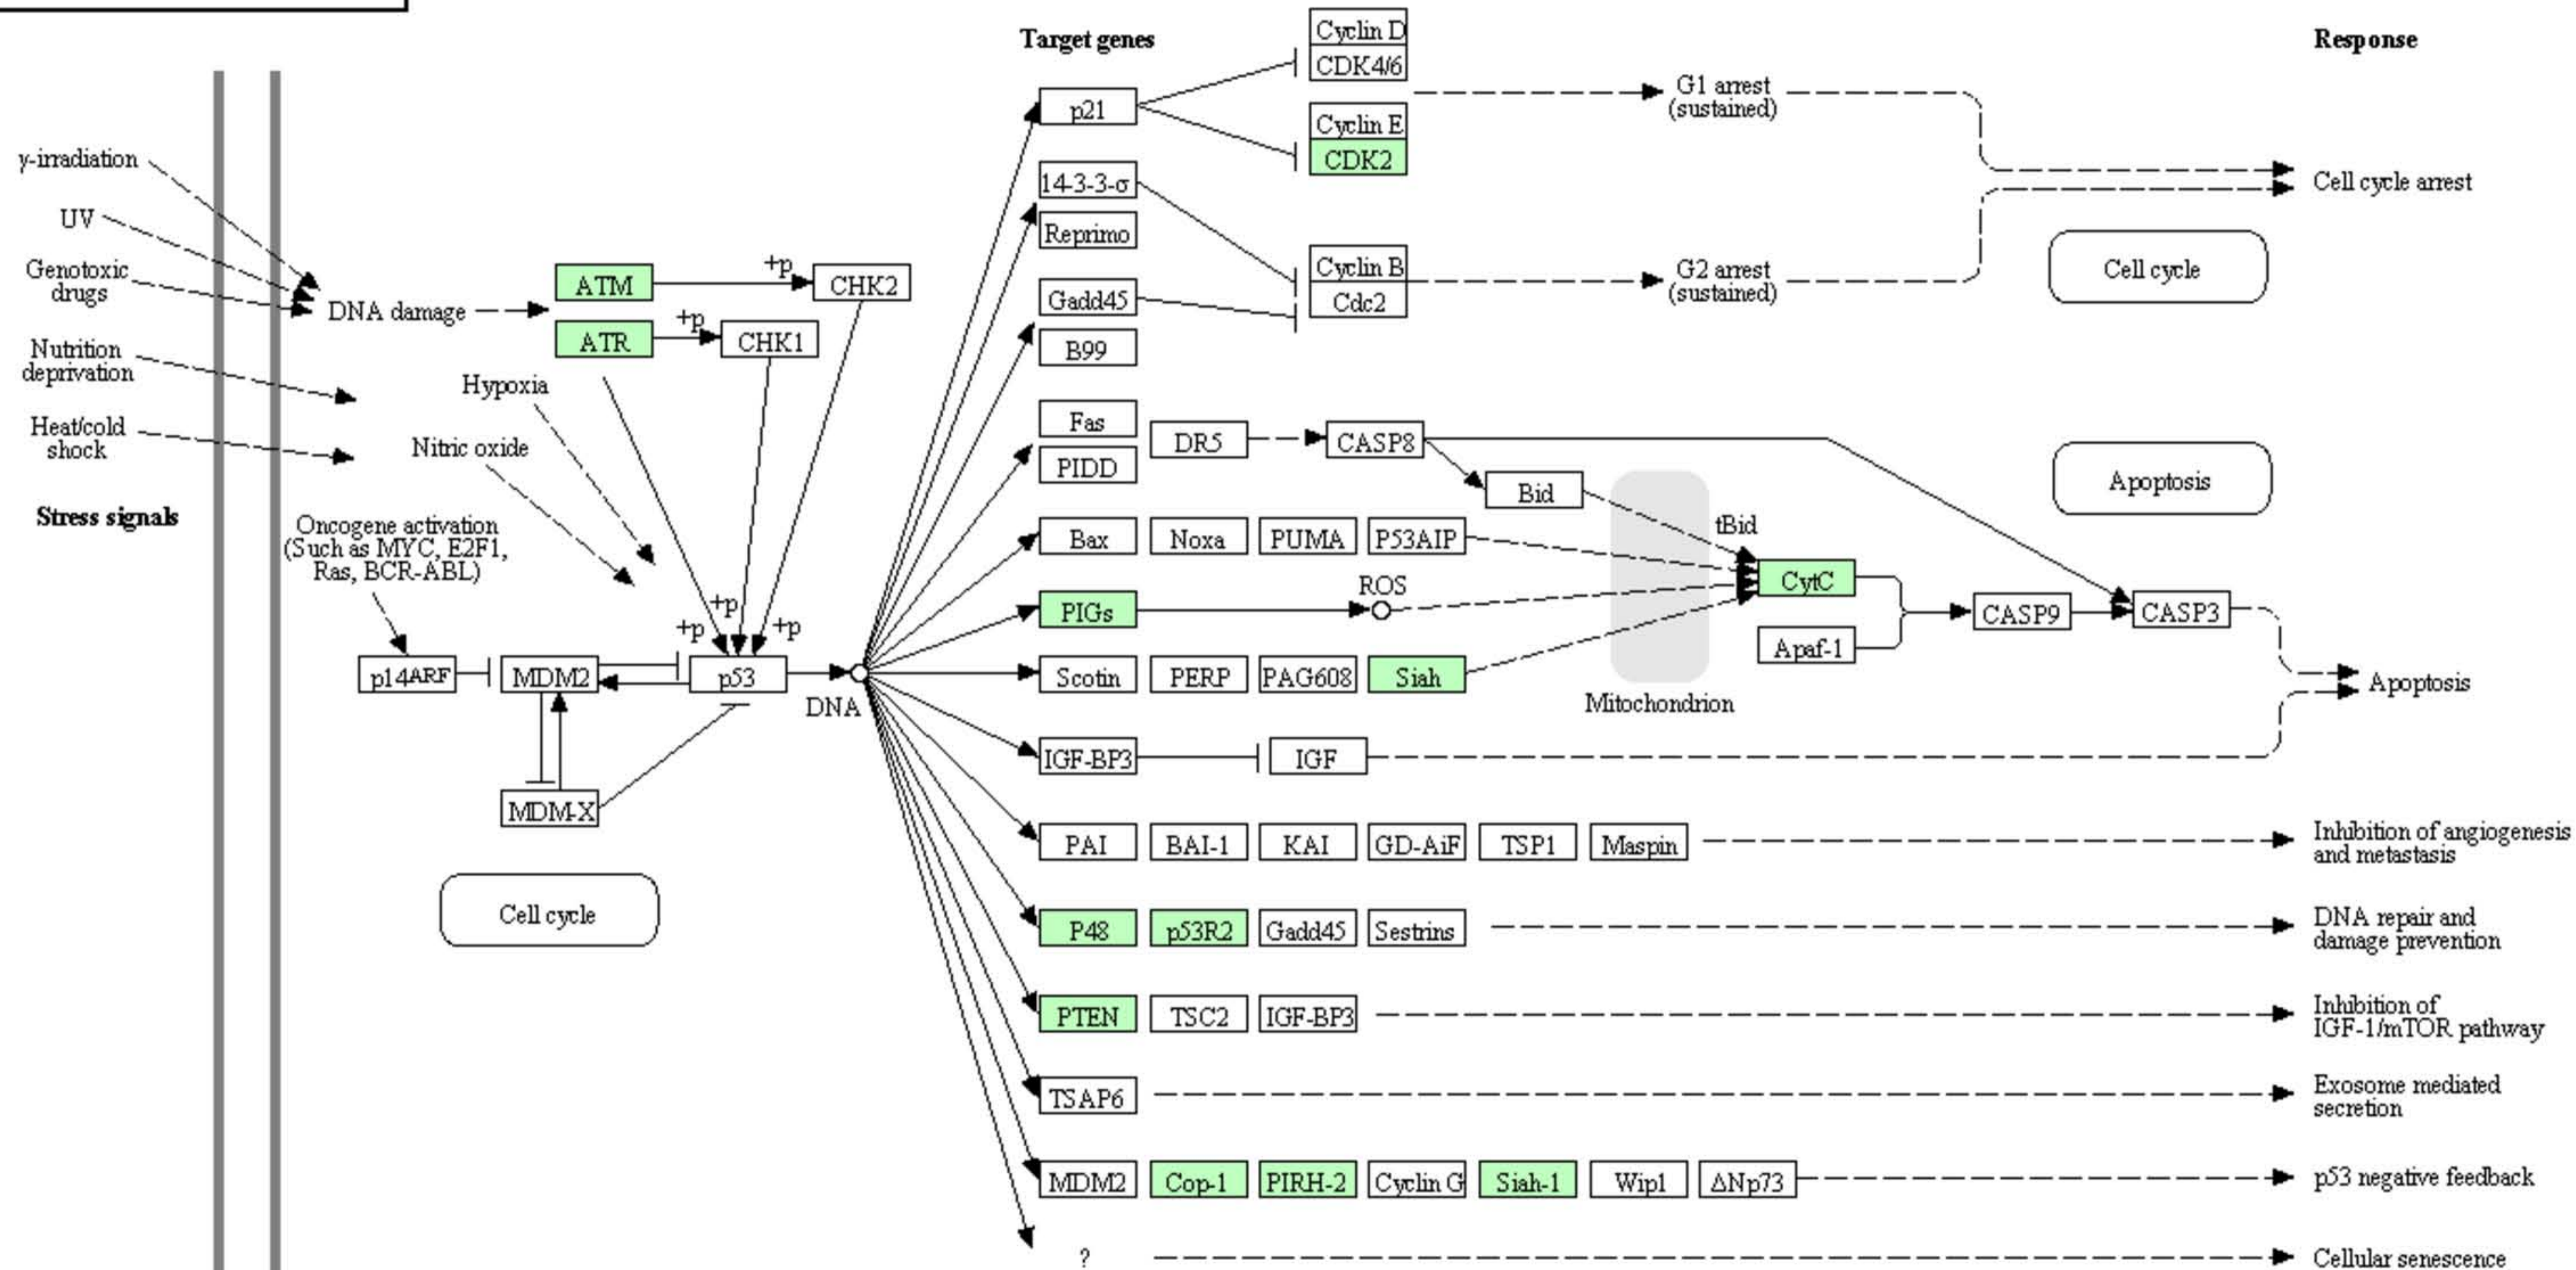



# PANTOTHENATE AND CoA BIOSYNTHESIS

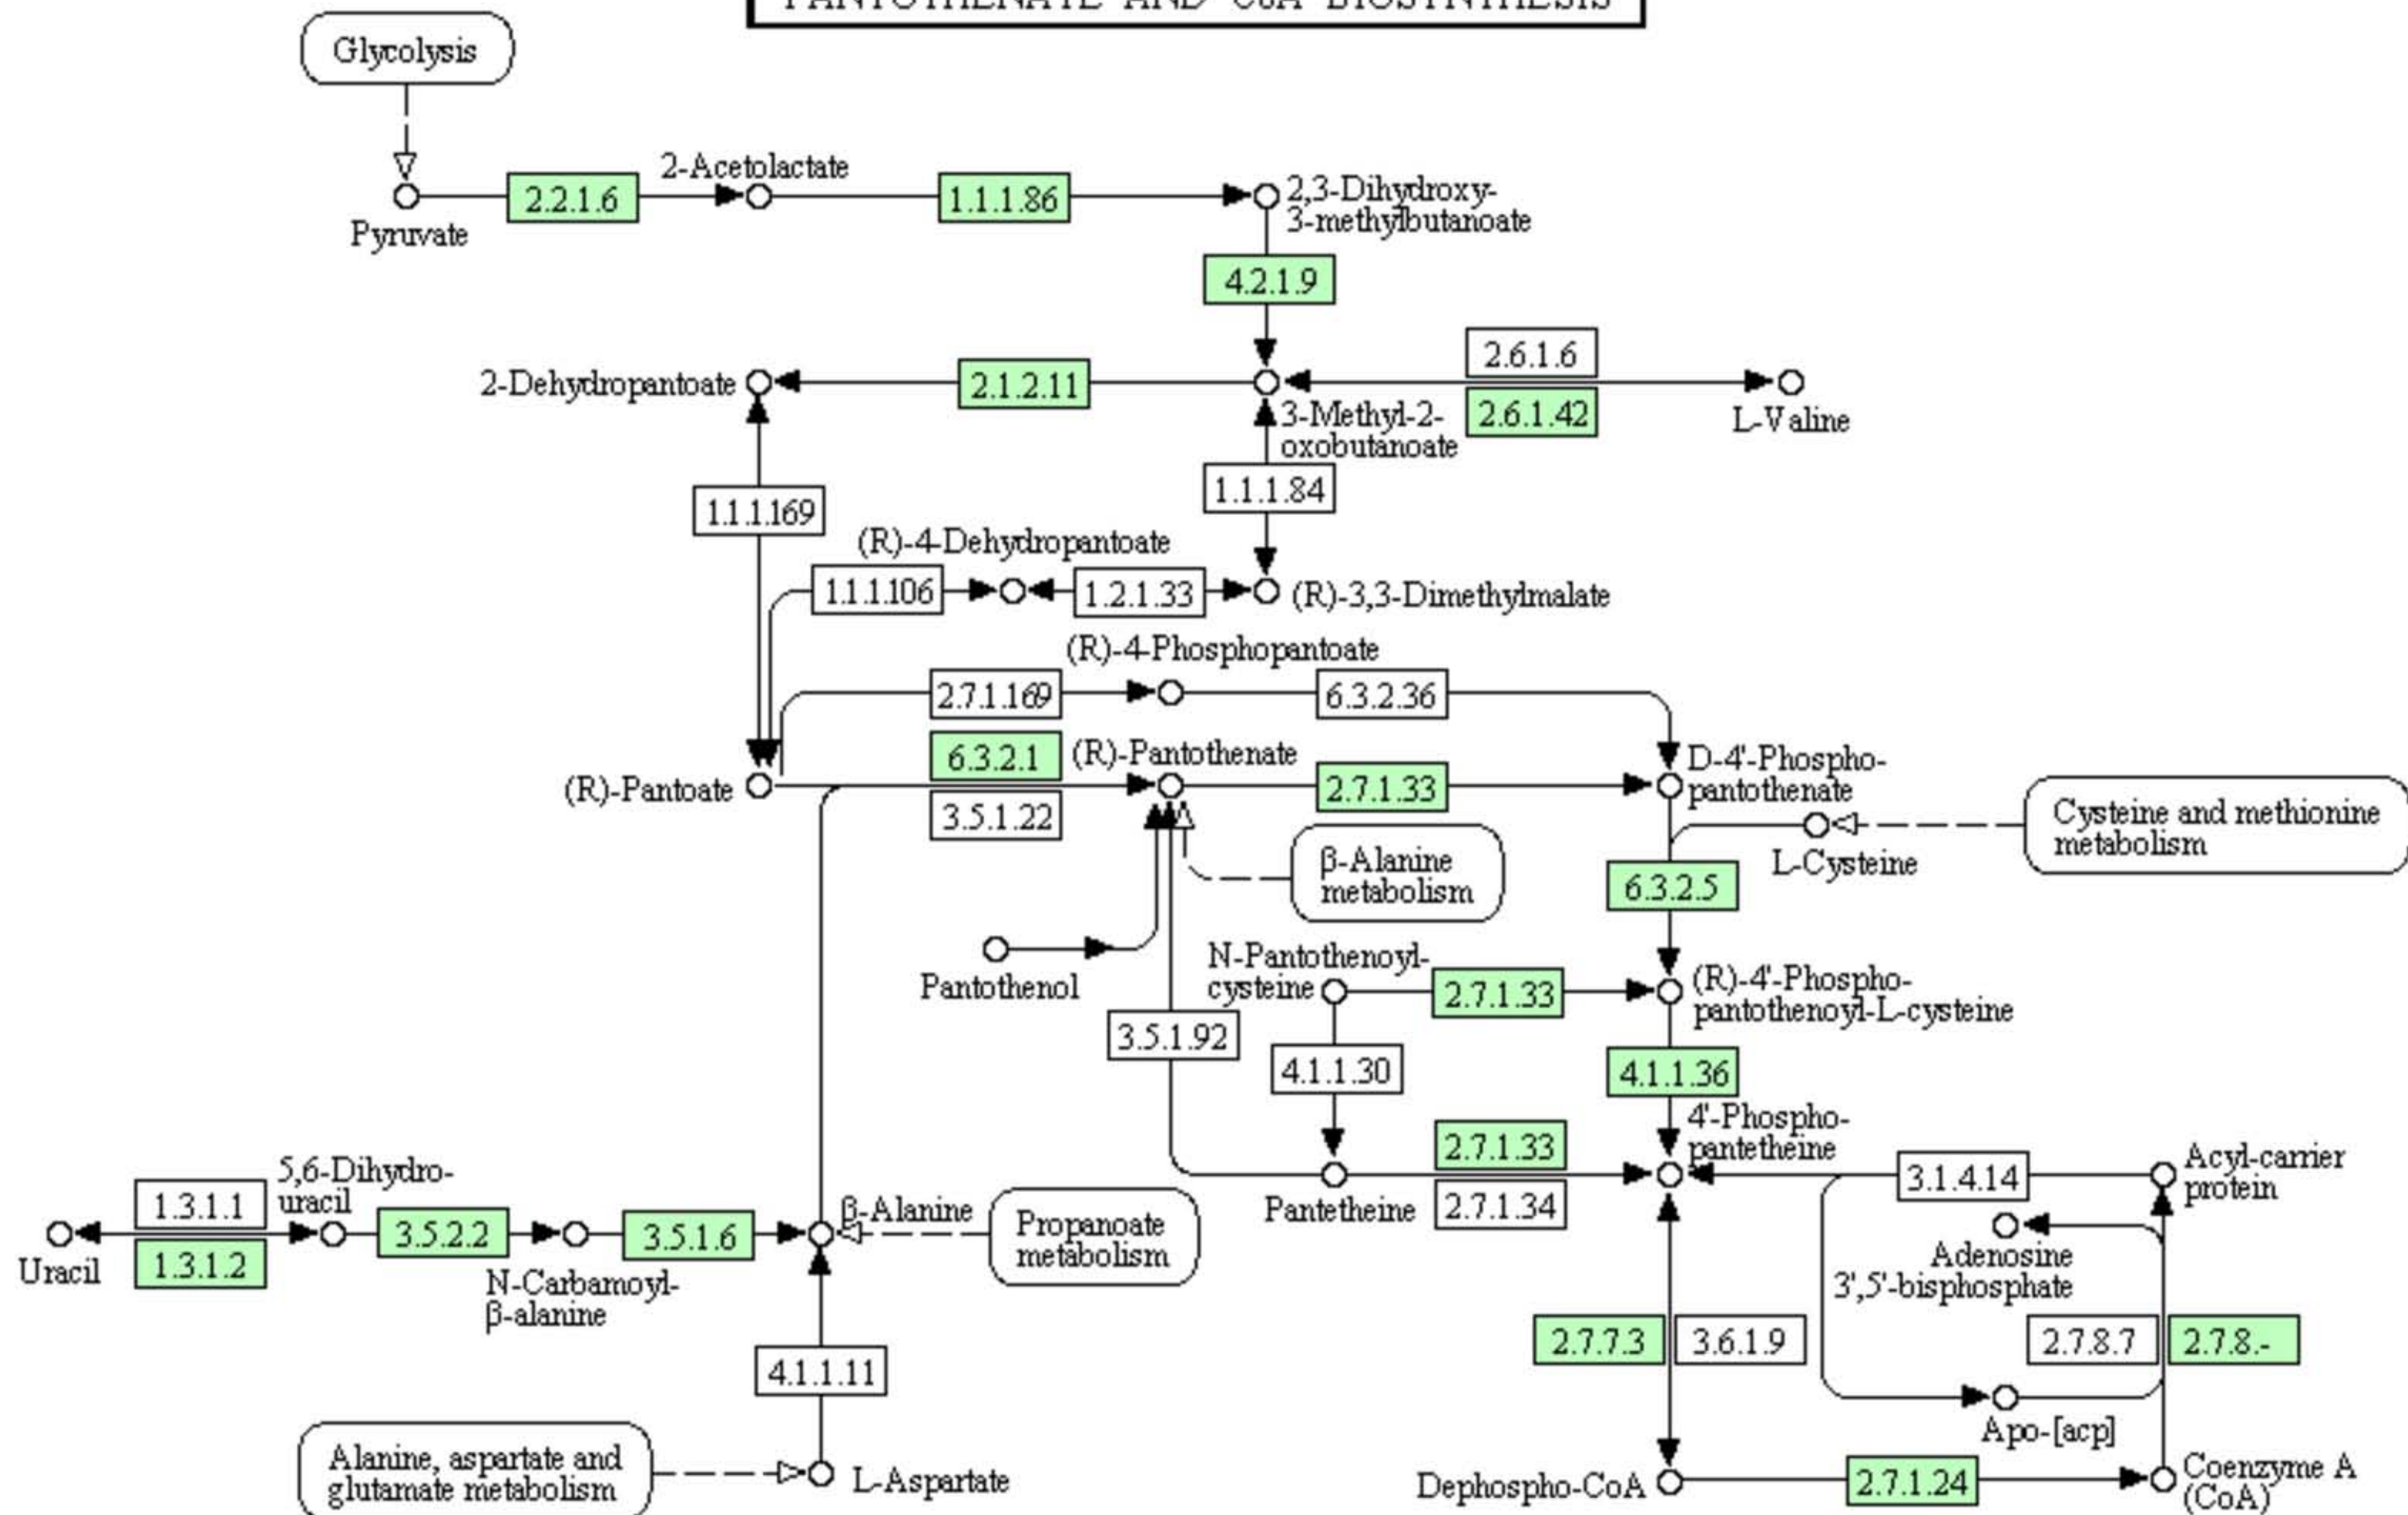



# PENTOSE AND GLUCURONATE INTERCONVERSIONS

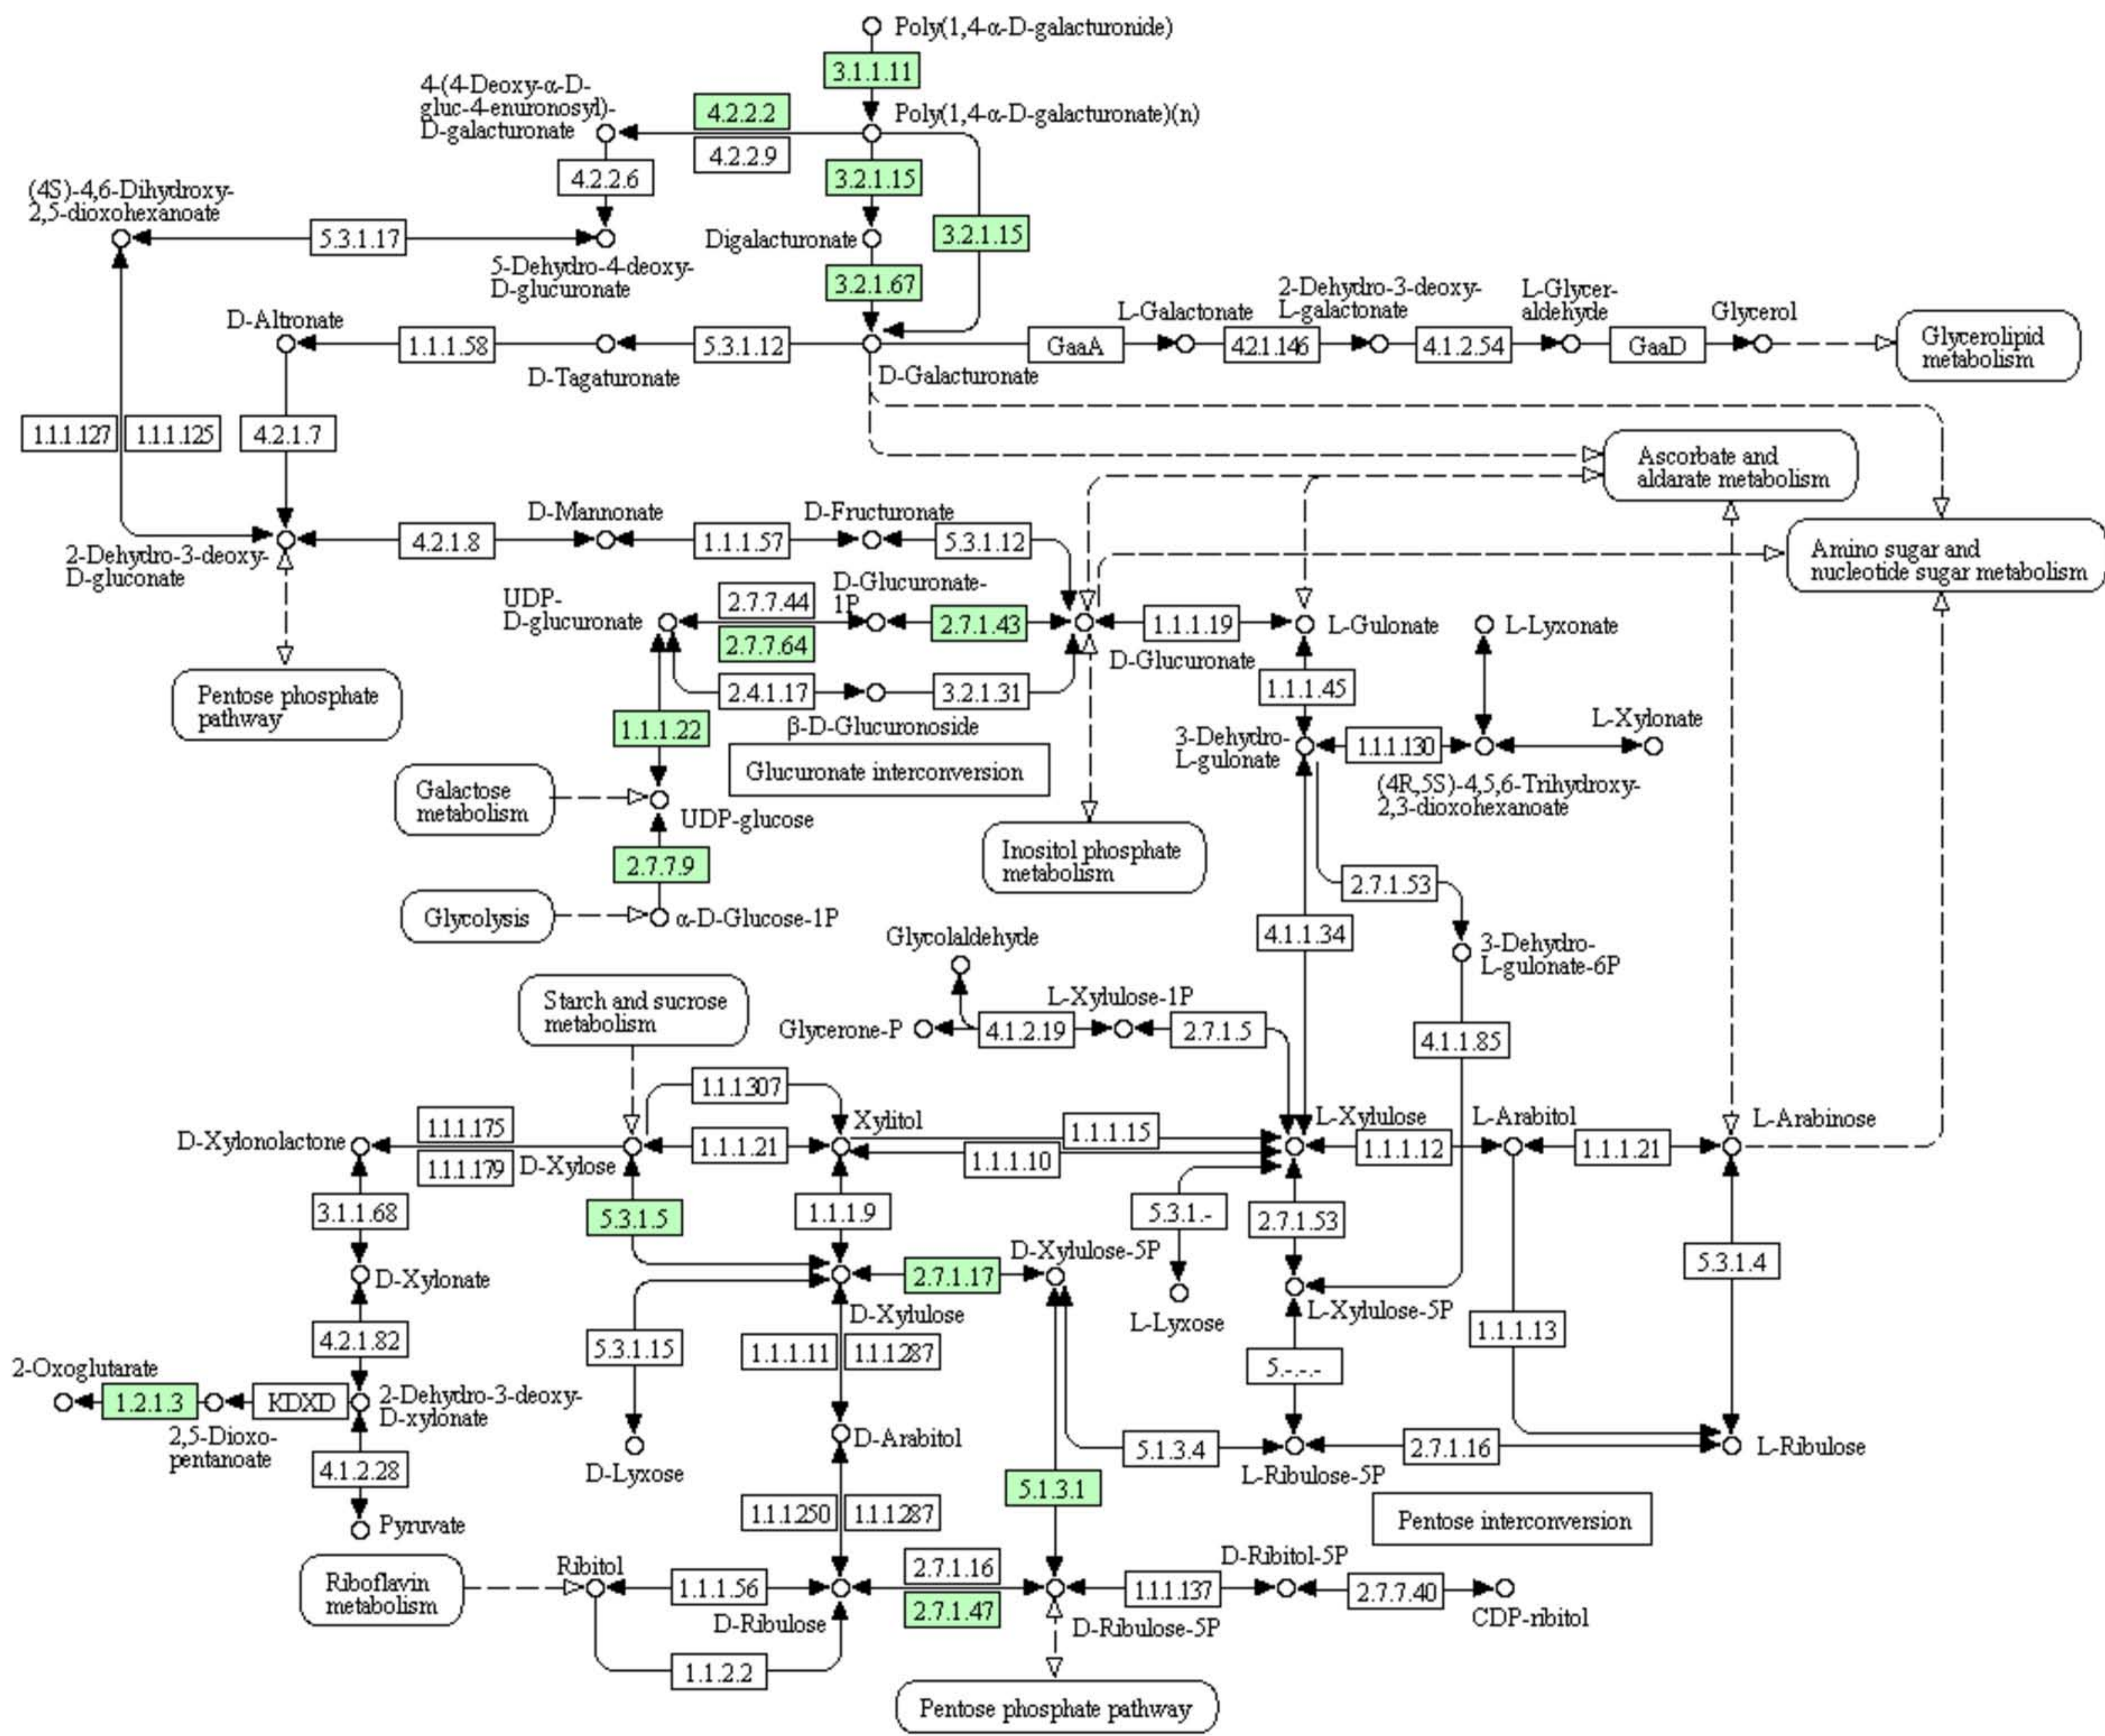



# PENTOSE PHOSPHATE PATHWAY

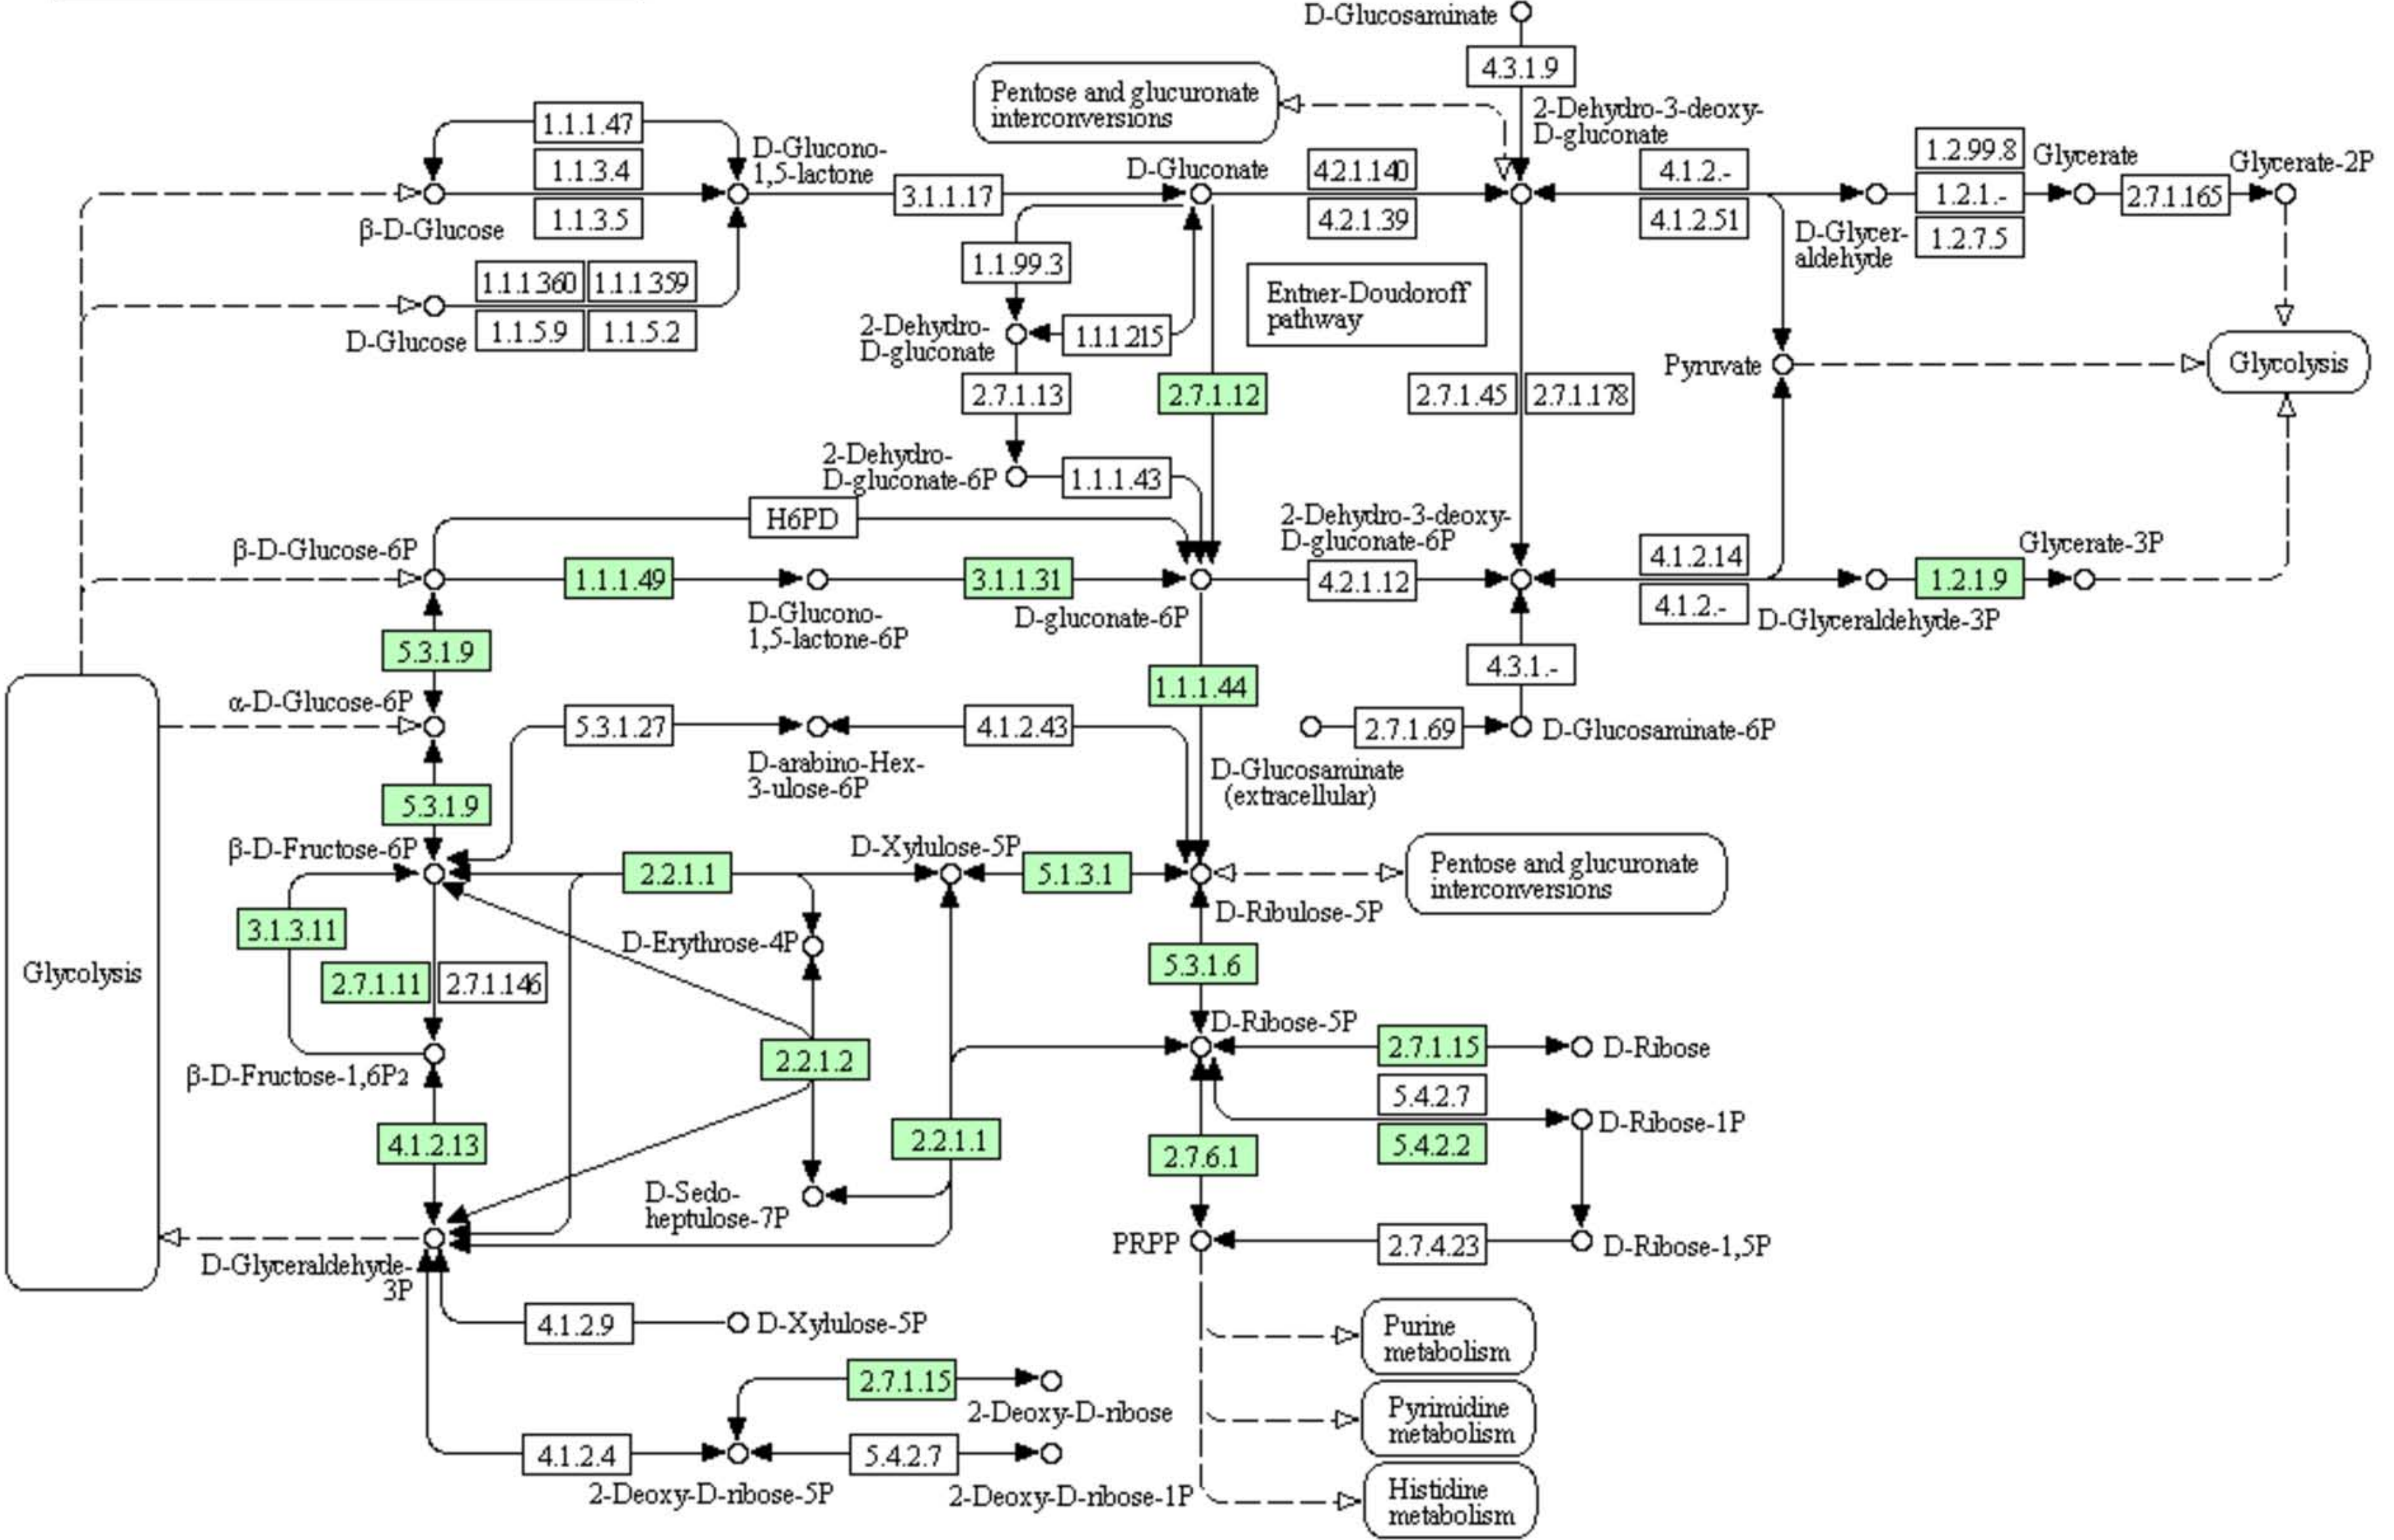



# PEPTIDOGLYCAN BIOSYNTHESIS

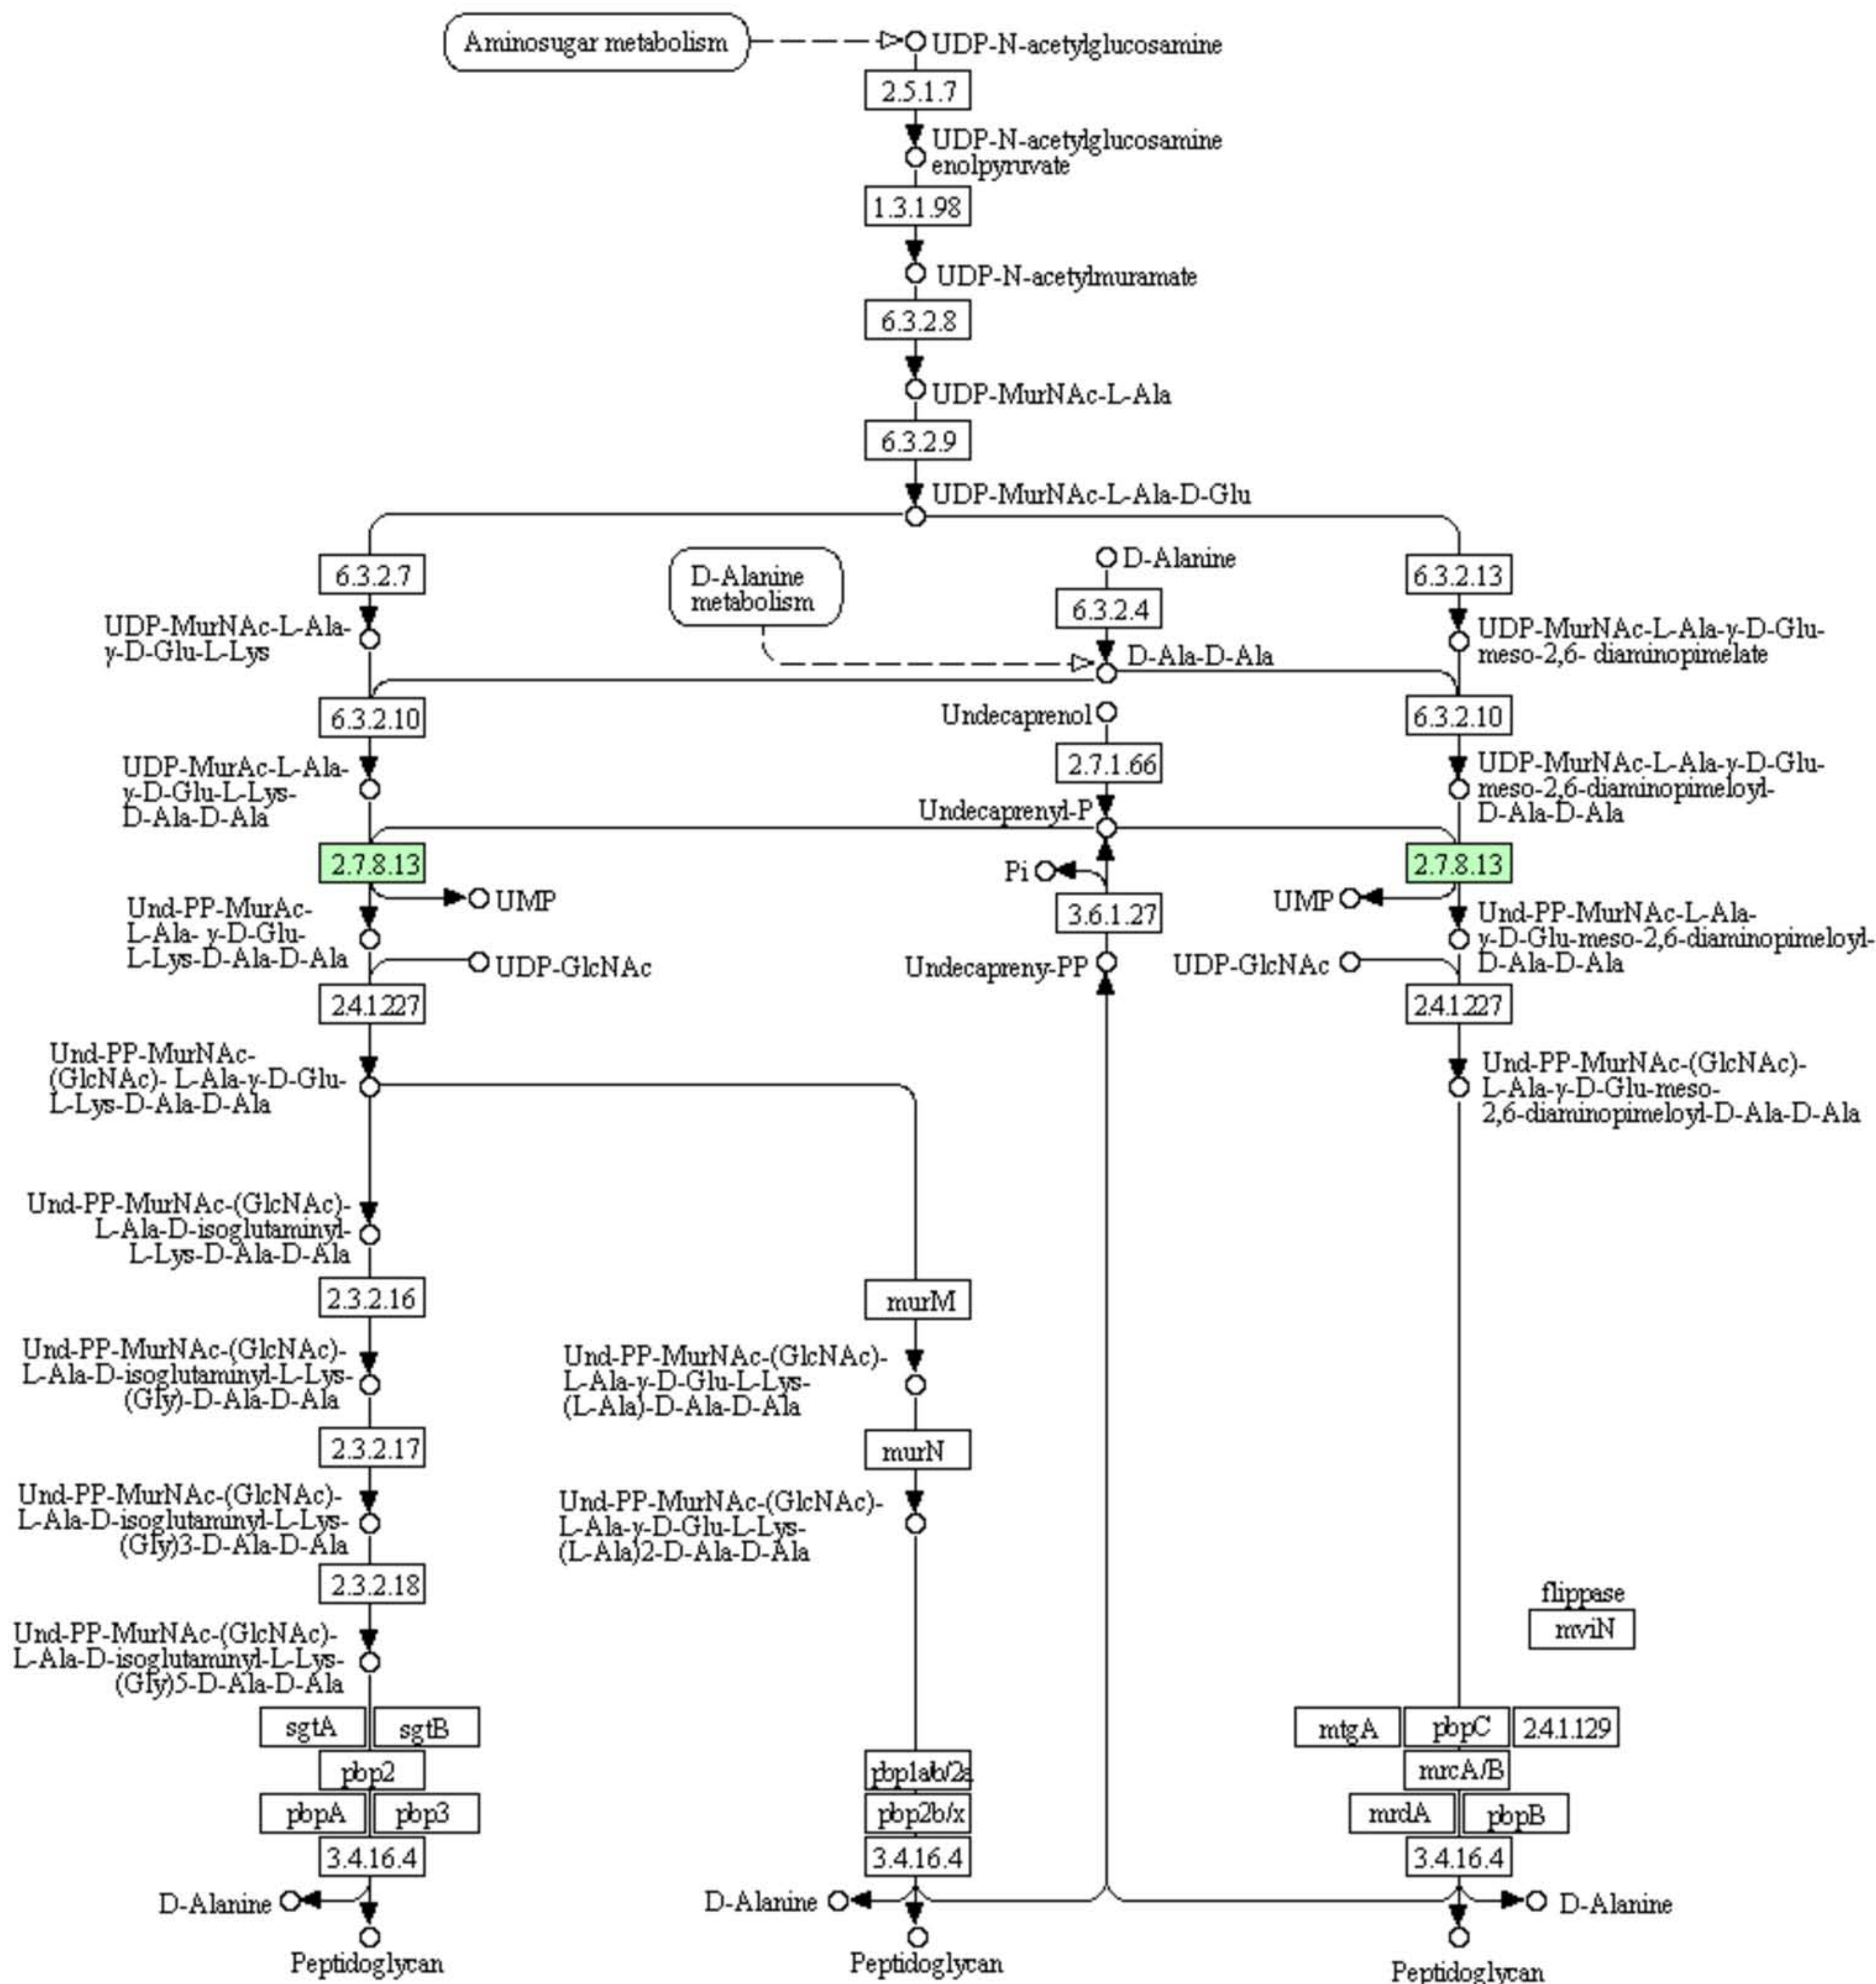



**PEROXISOME**

**Peroxisome biogenesis**

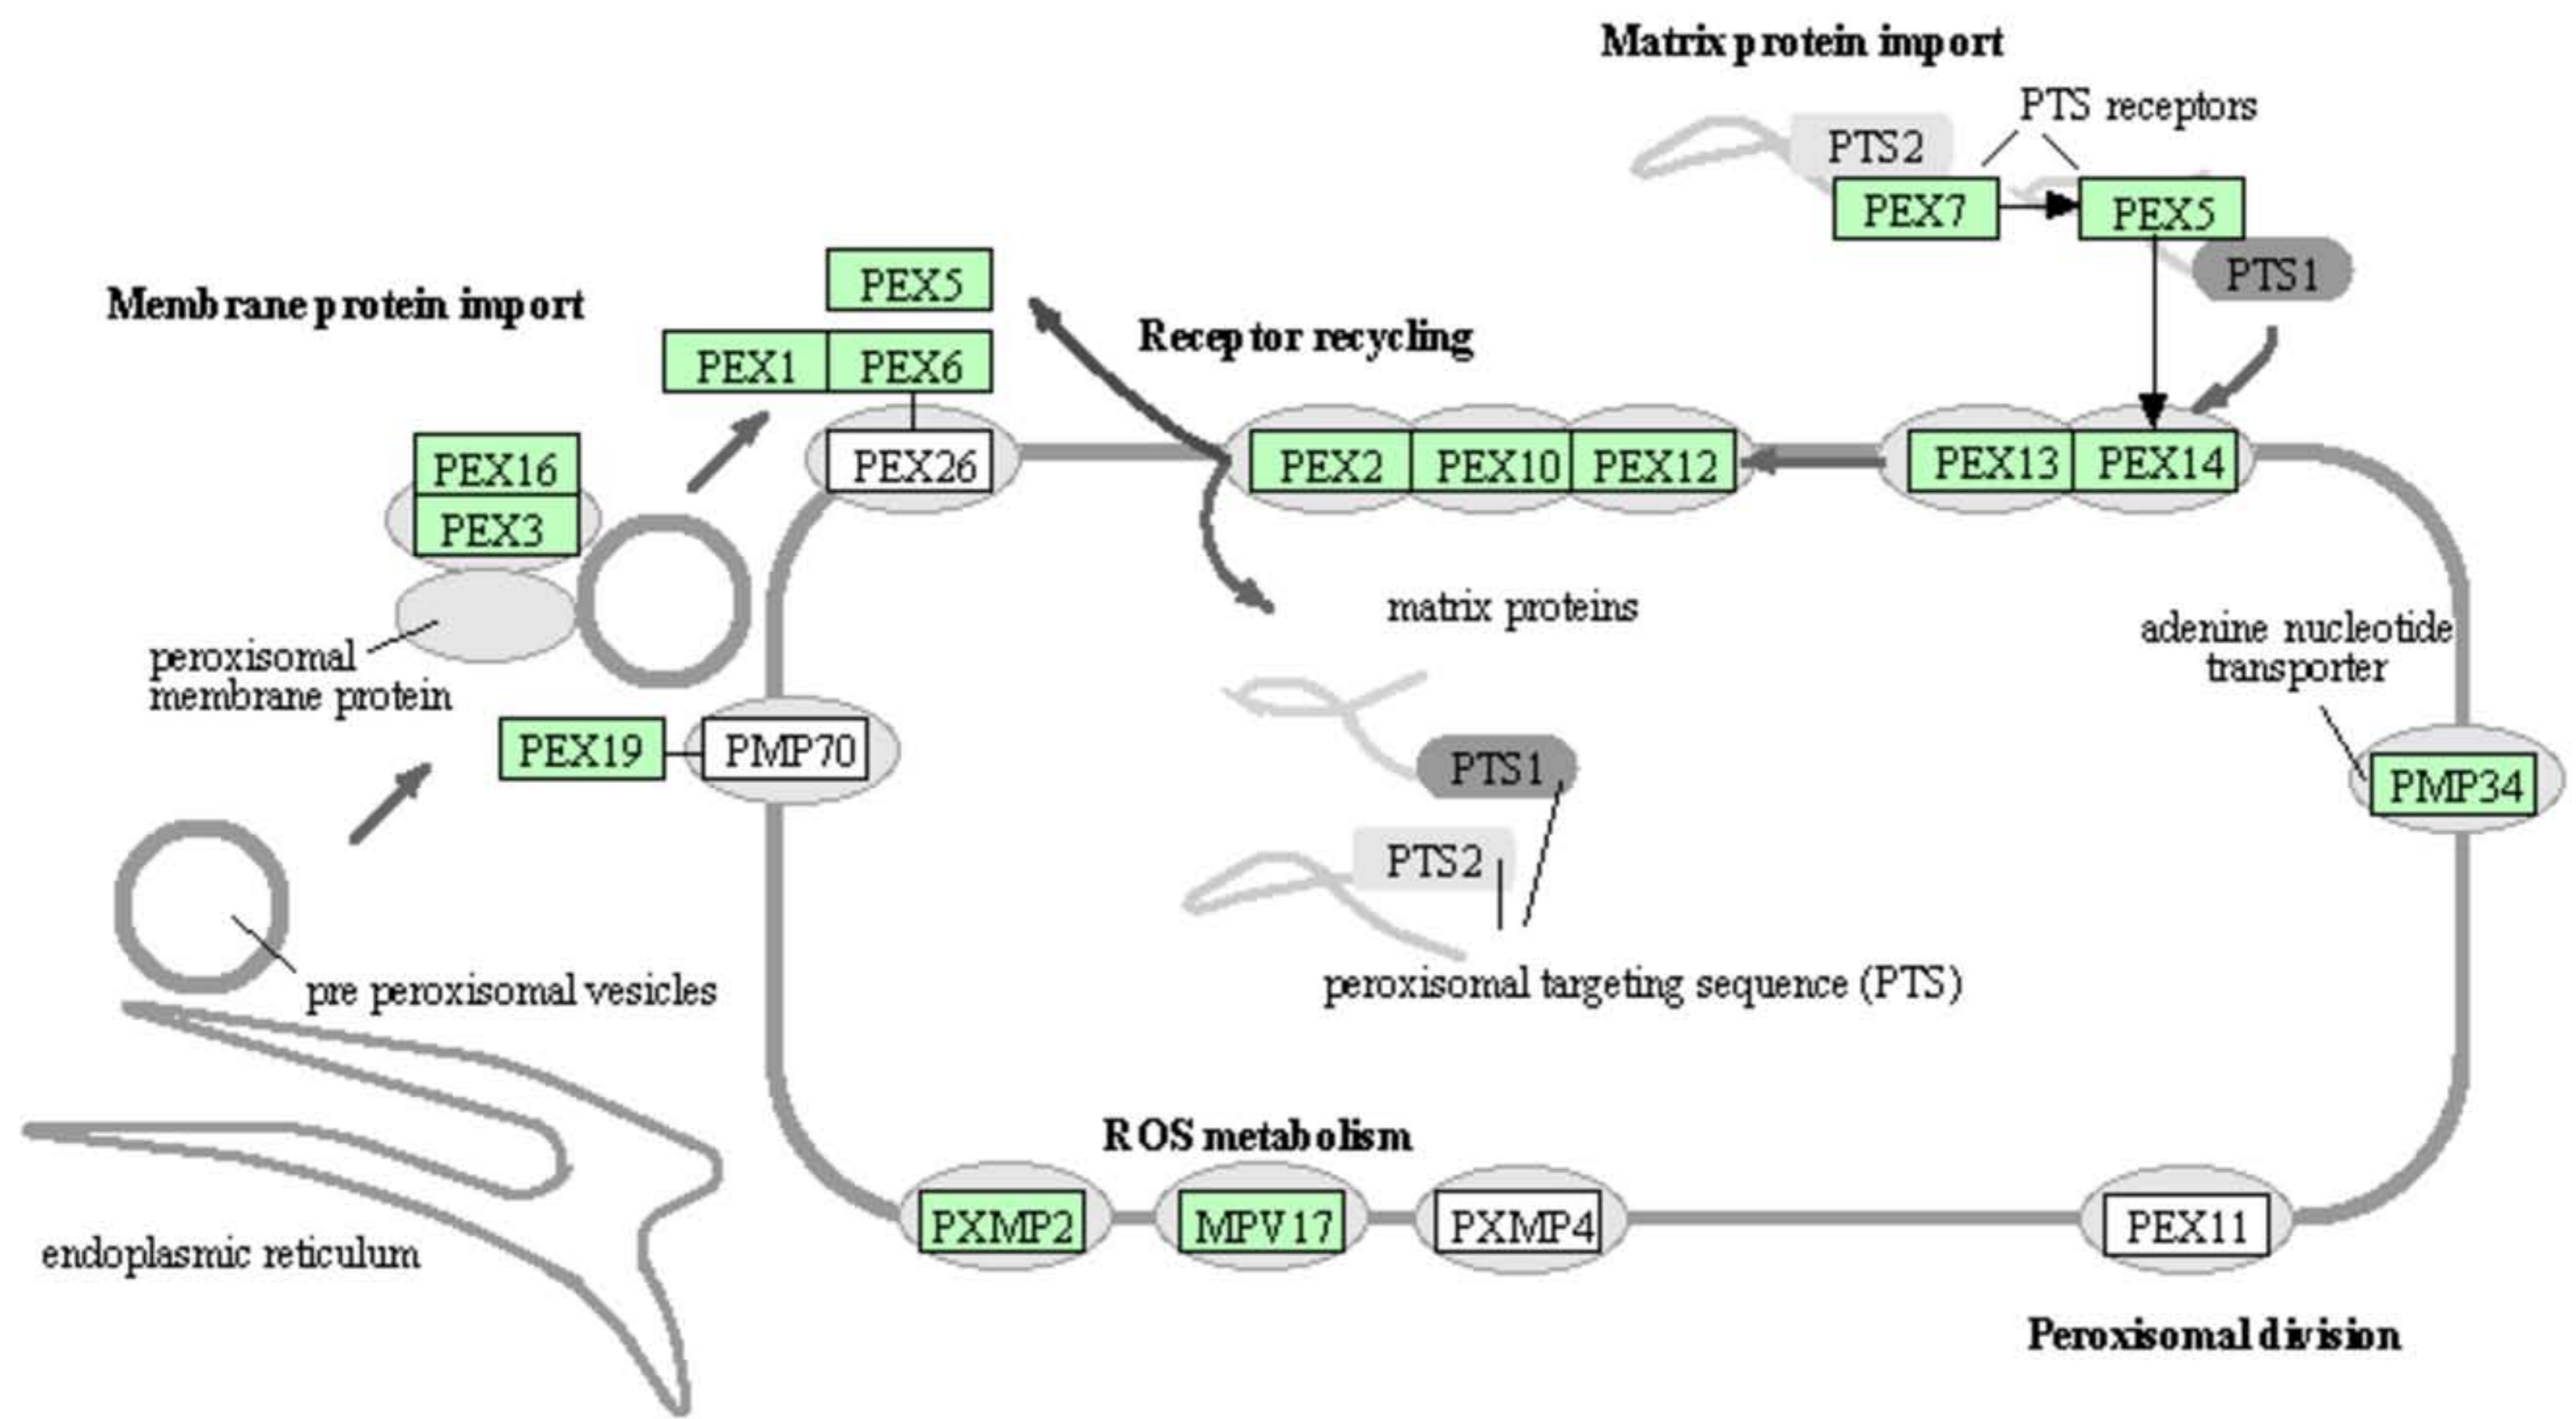

**Peroxisomal proteins**

**fatty acid-oxidation**

- α-oxidation**
  - matrix proteins (PTS1 type): HPCL2
  - matrix proteins (PTS2 type): PHYH
  - Fatty acid degradation
- β-oxidation**
  - AMACR
  - ACOX
  - DBP
  - SCPX
  - BAAT
  - PPAR signaling pathway
  - Primary bile acid biosynthesis
  - membrane proteins (PTS2 type): PBE, ACAA1
- unsaturated fatty acid β-oxidation** (PTS1 type)
  - membrane proteins: PDCR, ABCD, VLACS
  - ECH, ACSL
- other-oxidation** (PTS1 type)
  - PECR, PECl, NUDT7, NUDT12, NUDT19
  - PTE, CRAT, CROT, MLYCD

**ether phospholipid biosynthesis**

- matrix proteins (PTS1 type): DHAPAT
- Glycerophospholipid metabolism
- matrix proteins (PTS2 type): AGPS
- Ether lipid metabolism
- membrane proteins: FAR

**sterol precursor biosynthesis**

- matrix proteins (PTS2 type): MVK, PMVK
- Terpenoid backbone biosynthesis

**amino acid metabolism** (PTS1 type)

- AGT, DAO, DDO, IDH
- PAOX, PIPOX, HMGCL, HAO

**antioxidant system**

- hydrogen peroxide metabolism (PTS1 type): CAT, SOD, INOS, PRDX5, PRDX1
- epoxide metabolism: EPHX2
- glutathione metabolism: GSTK1

**purine metabolism**

- XDH
- Purine metabolism

**retinol metabolism**

- DHRS4
- Retinol metabolism



**PHAGOSOME**

**Conventional phagocytosis**

**ER-mediated phagocytosis**

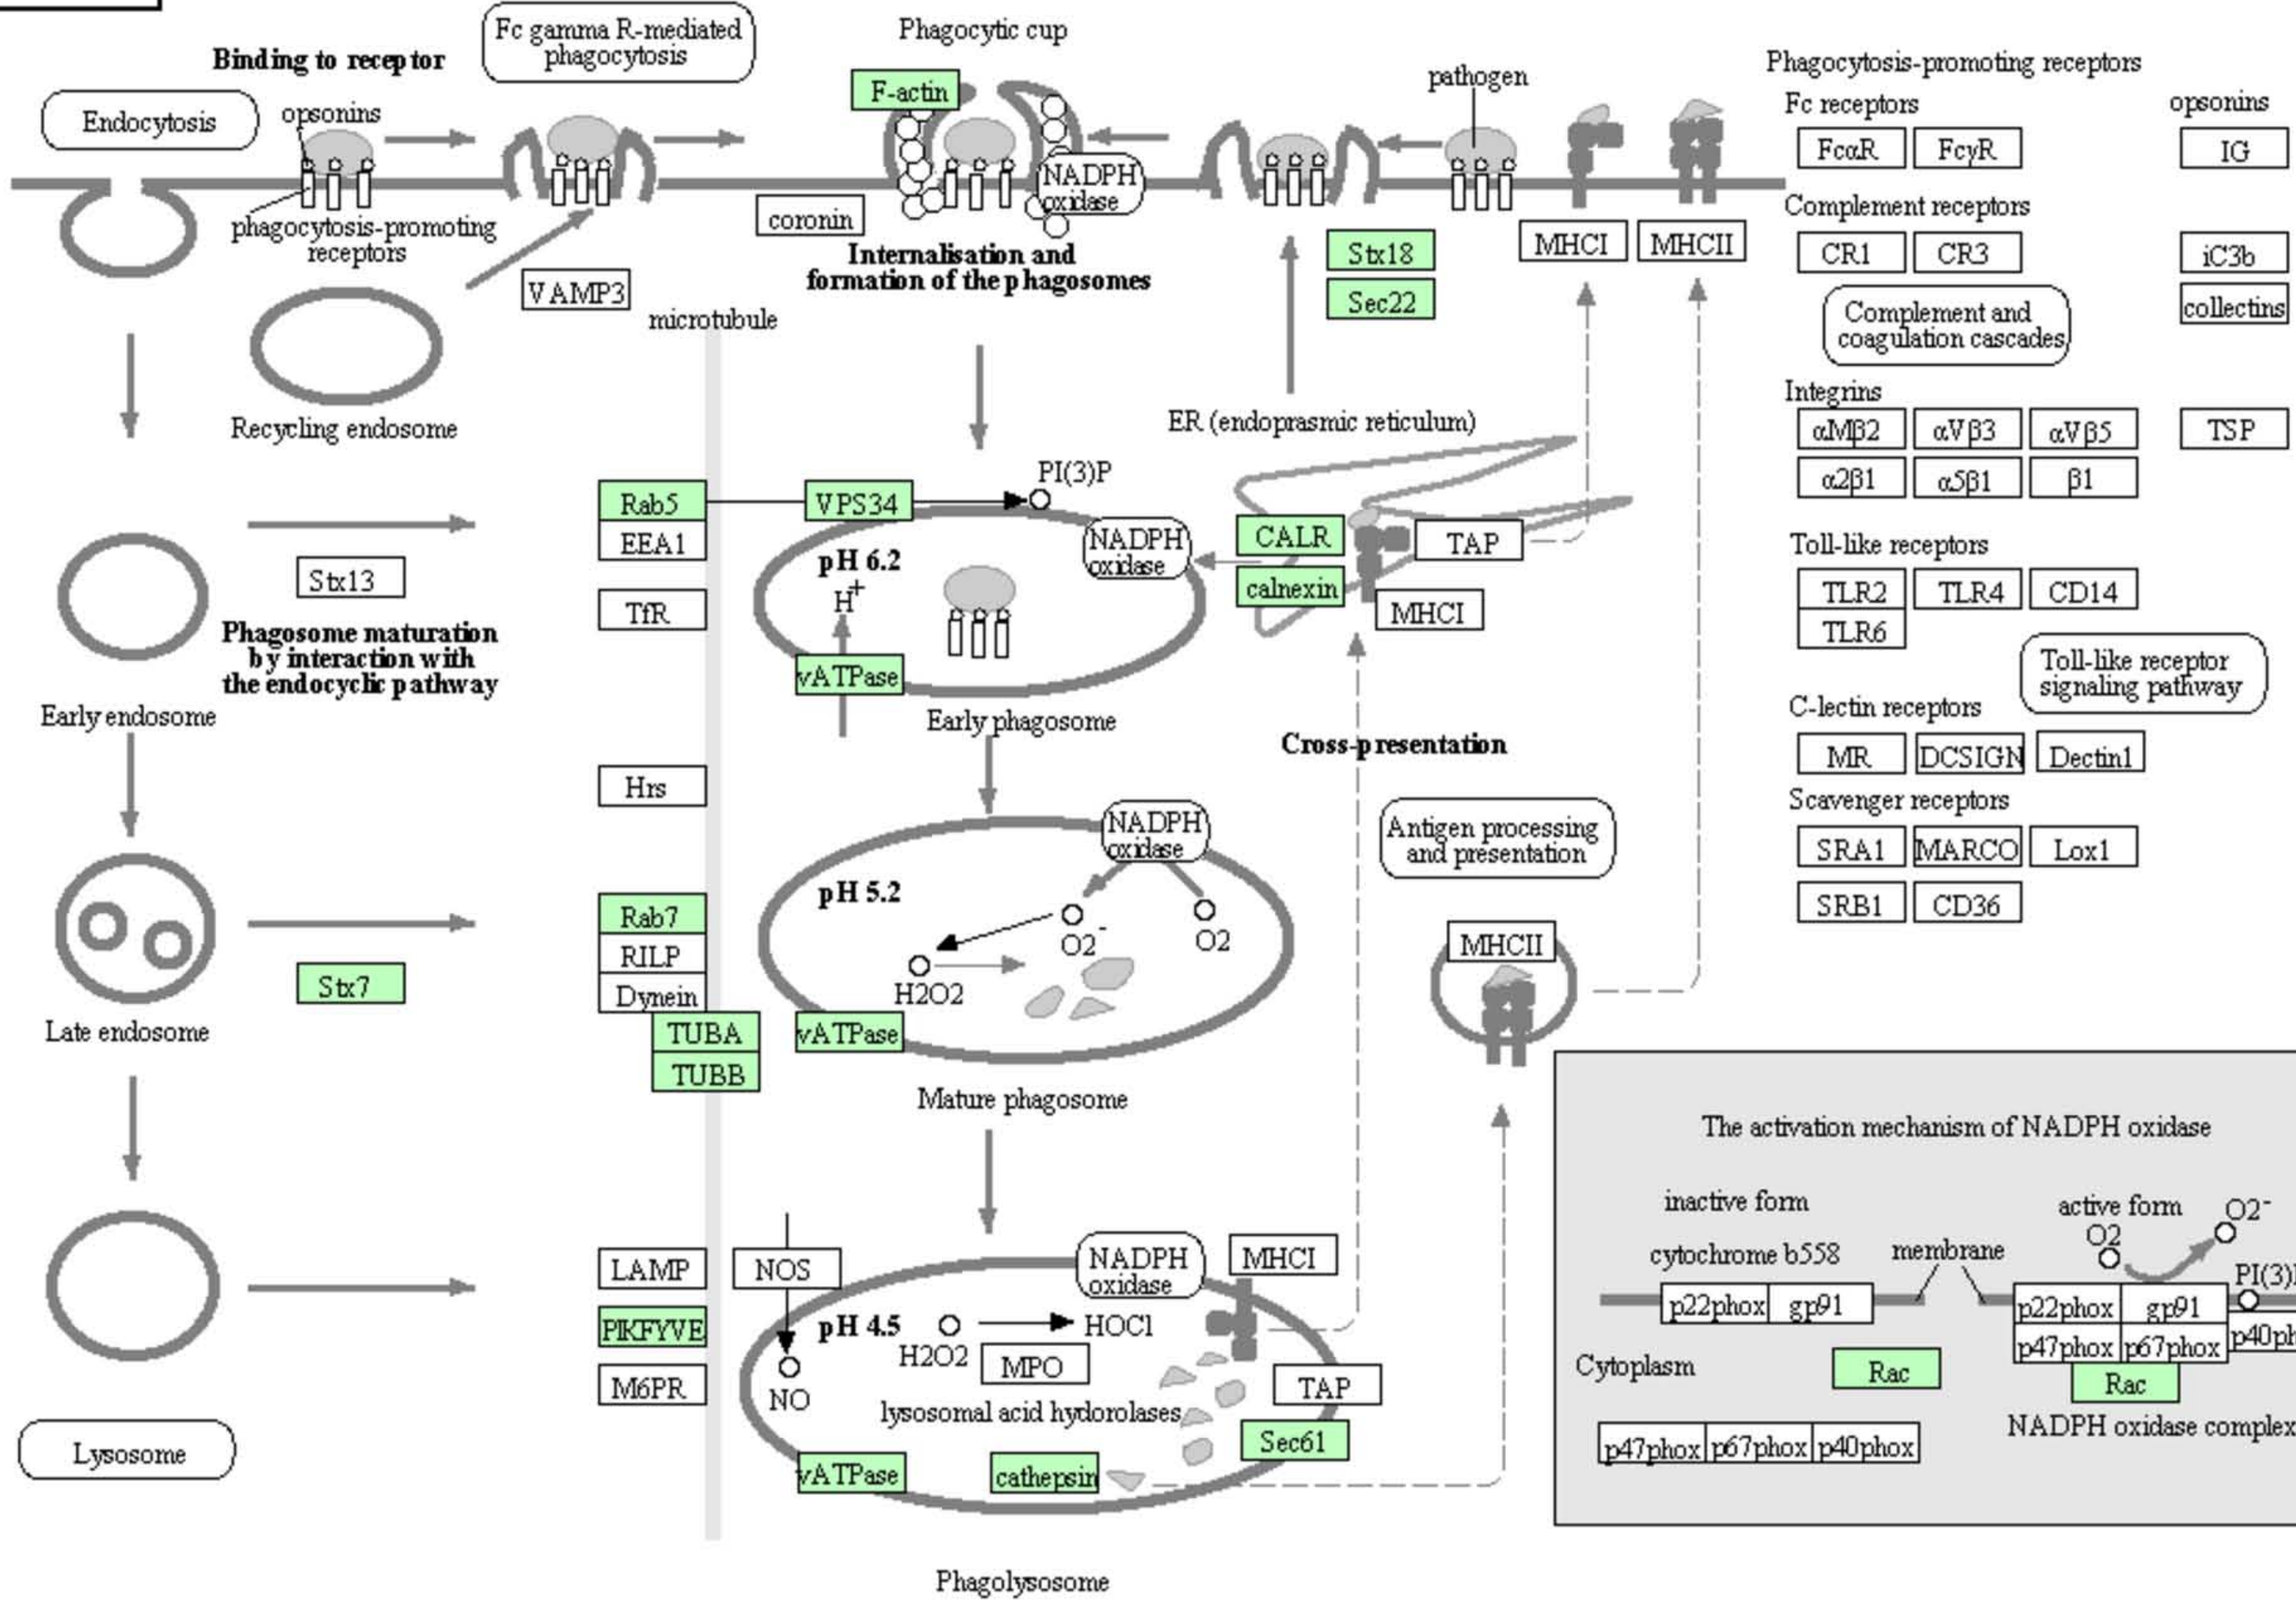







# PHENYLALANINE, TYROSINE AND TRYPTOPHAN BIOSYNTHESIS

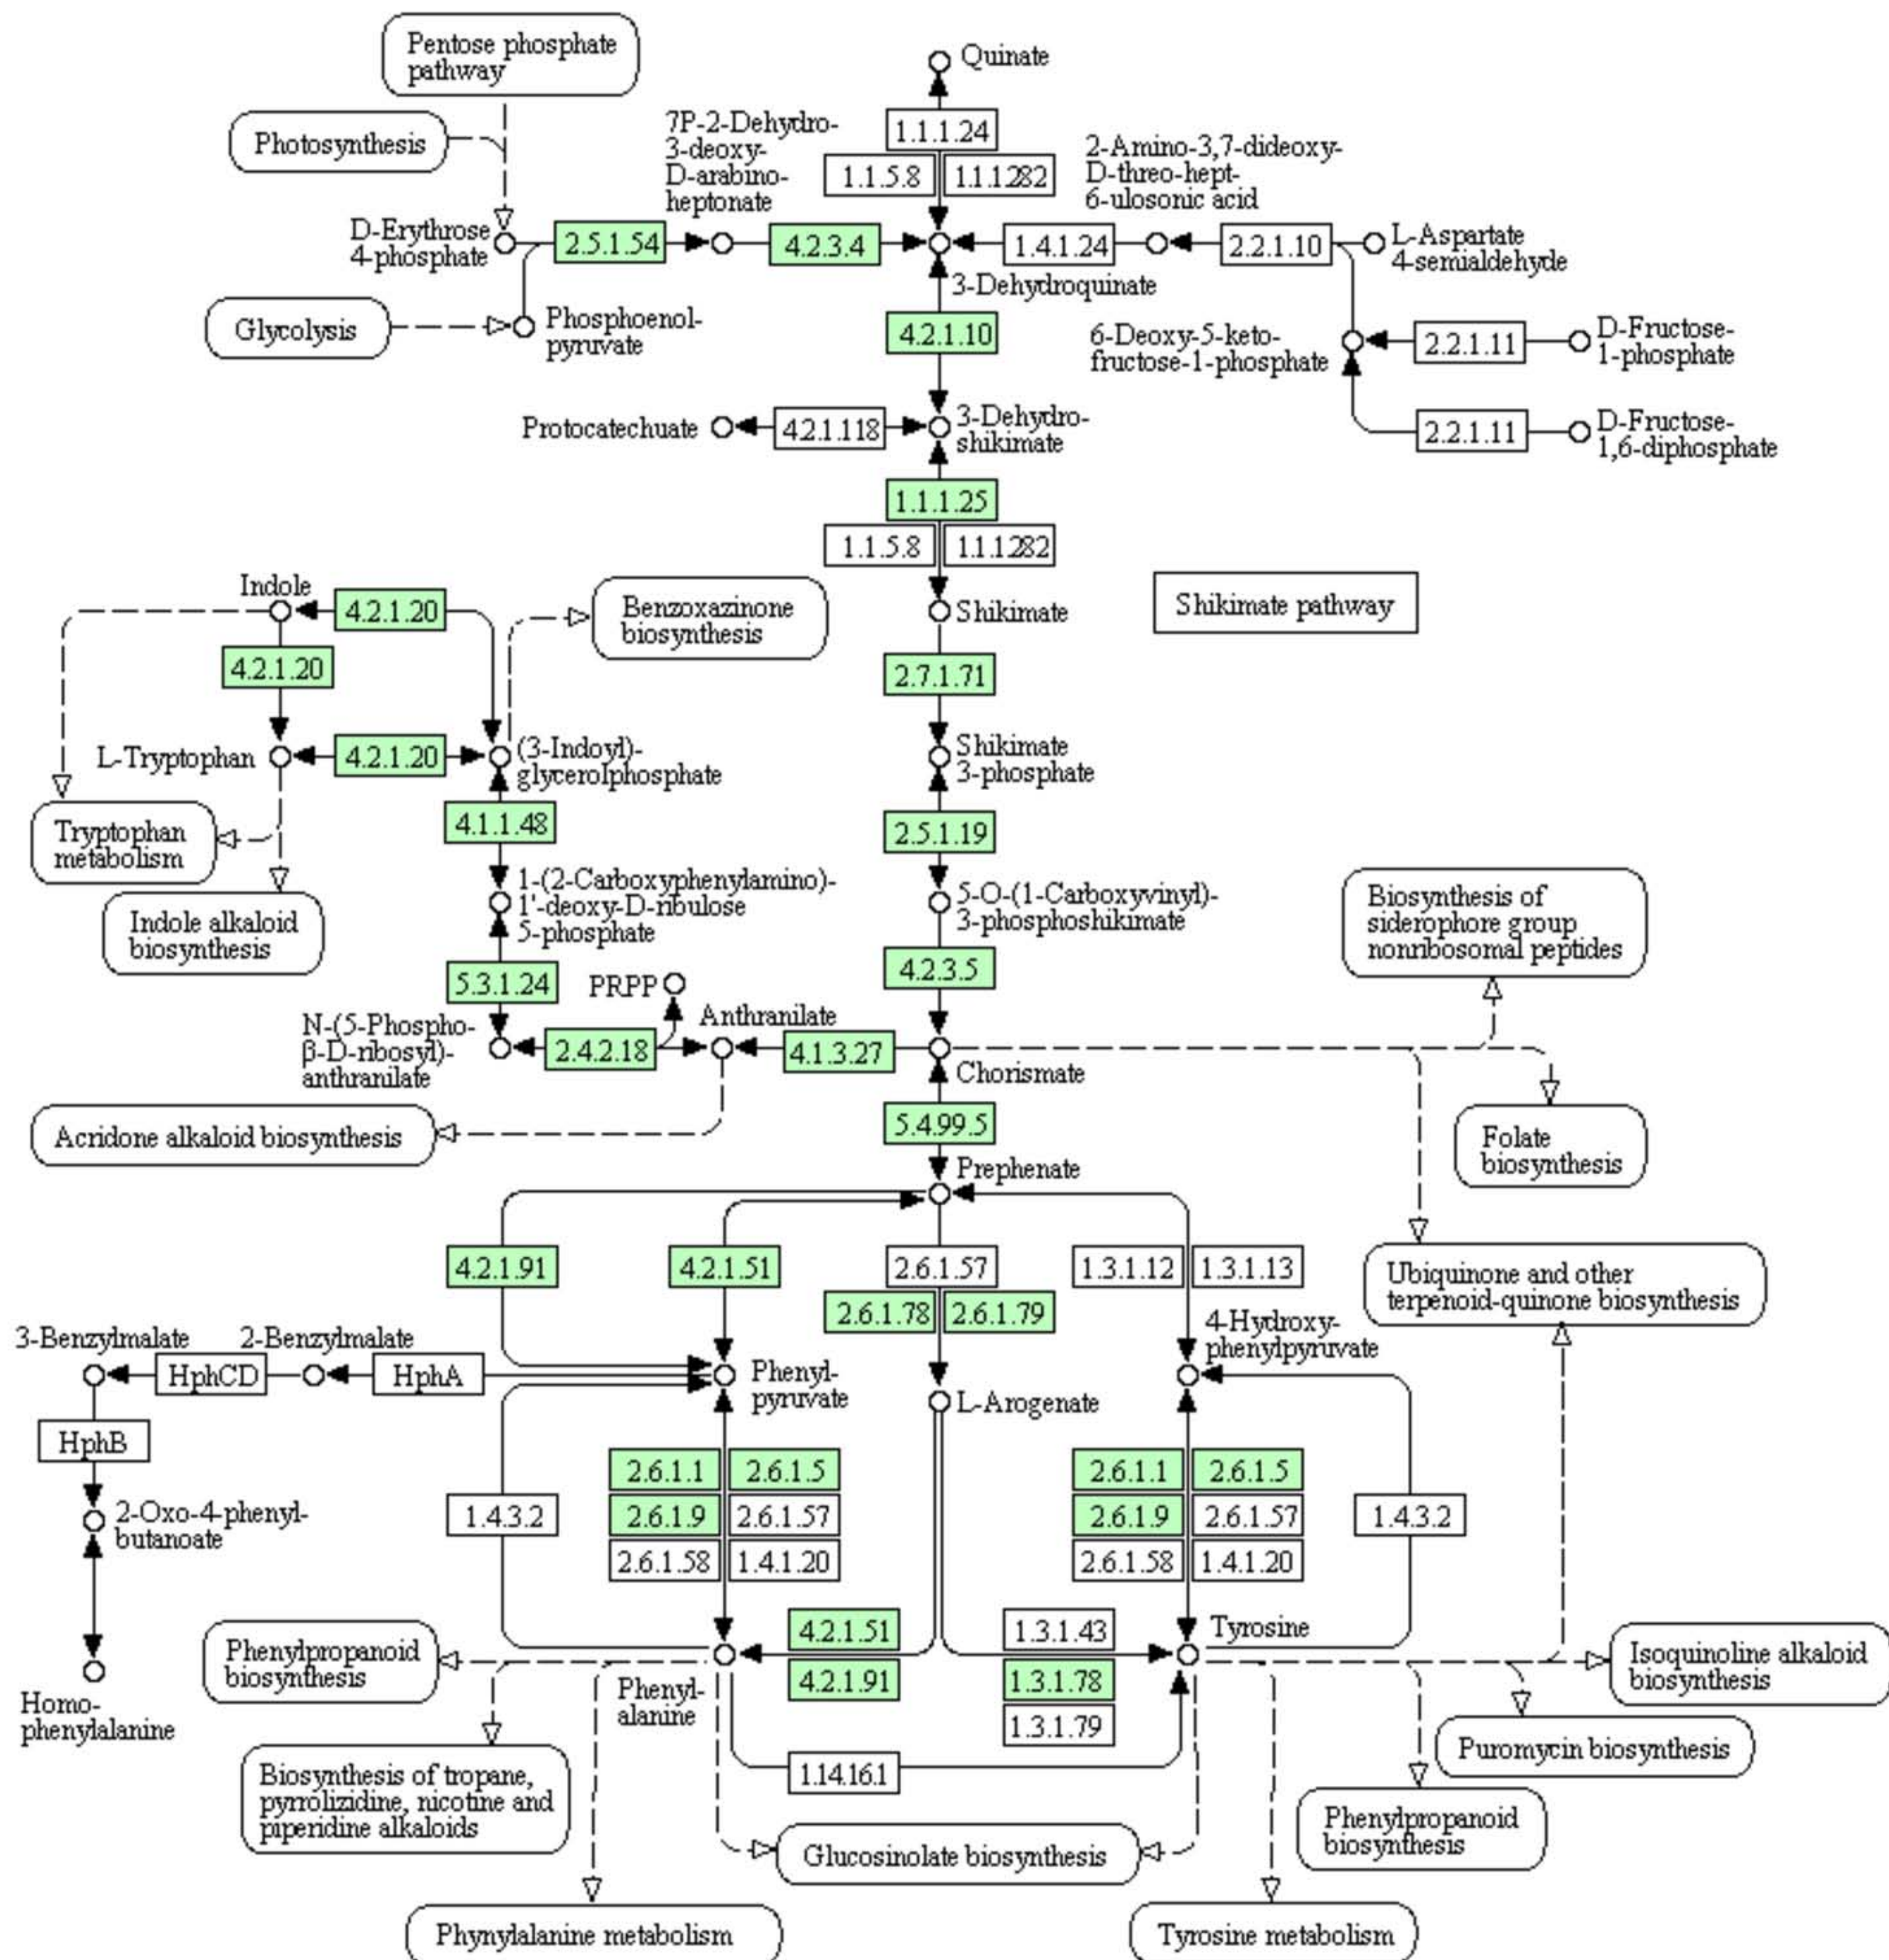



# PHENYLPROPANOID BIOSYNTHESIS

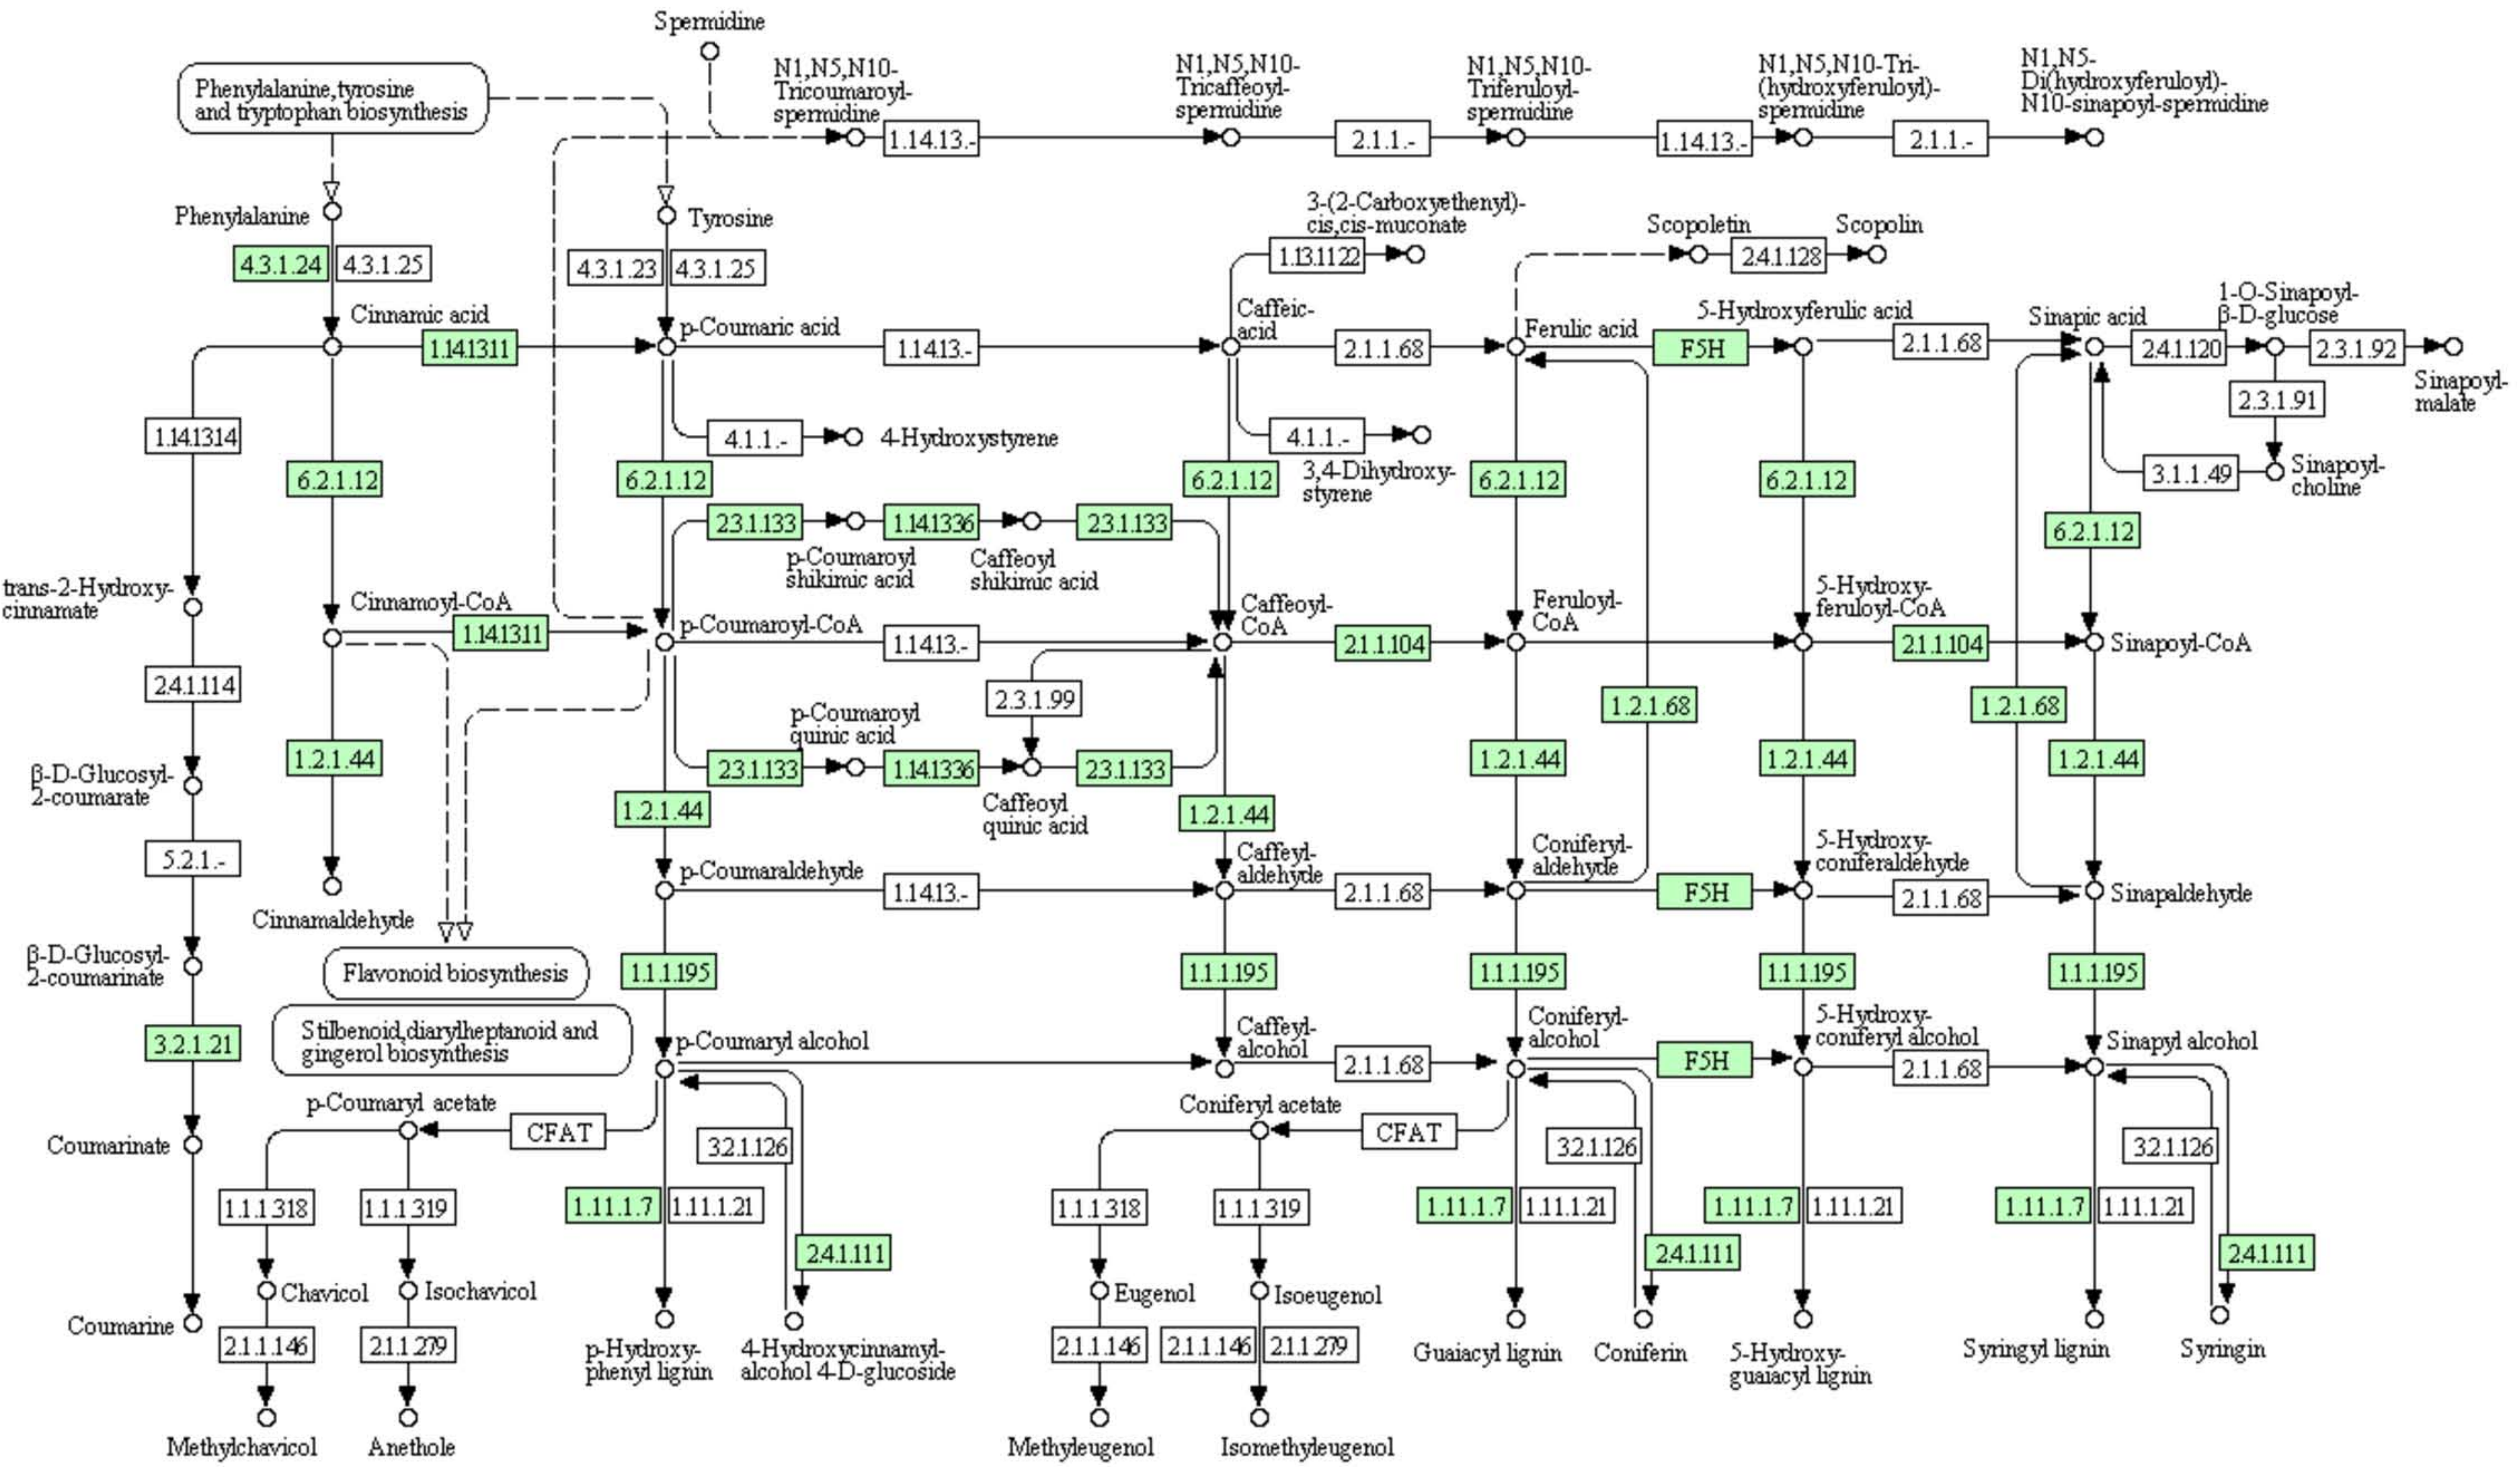



PHOSPHATIDYLINOSITOL SIGNALING SYSTEM

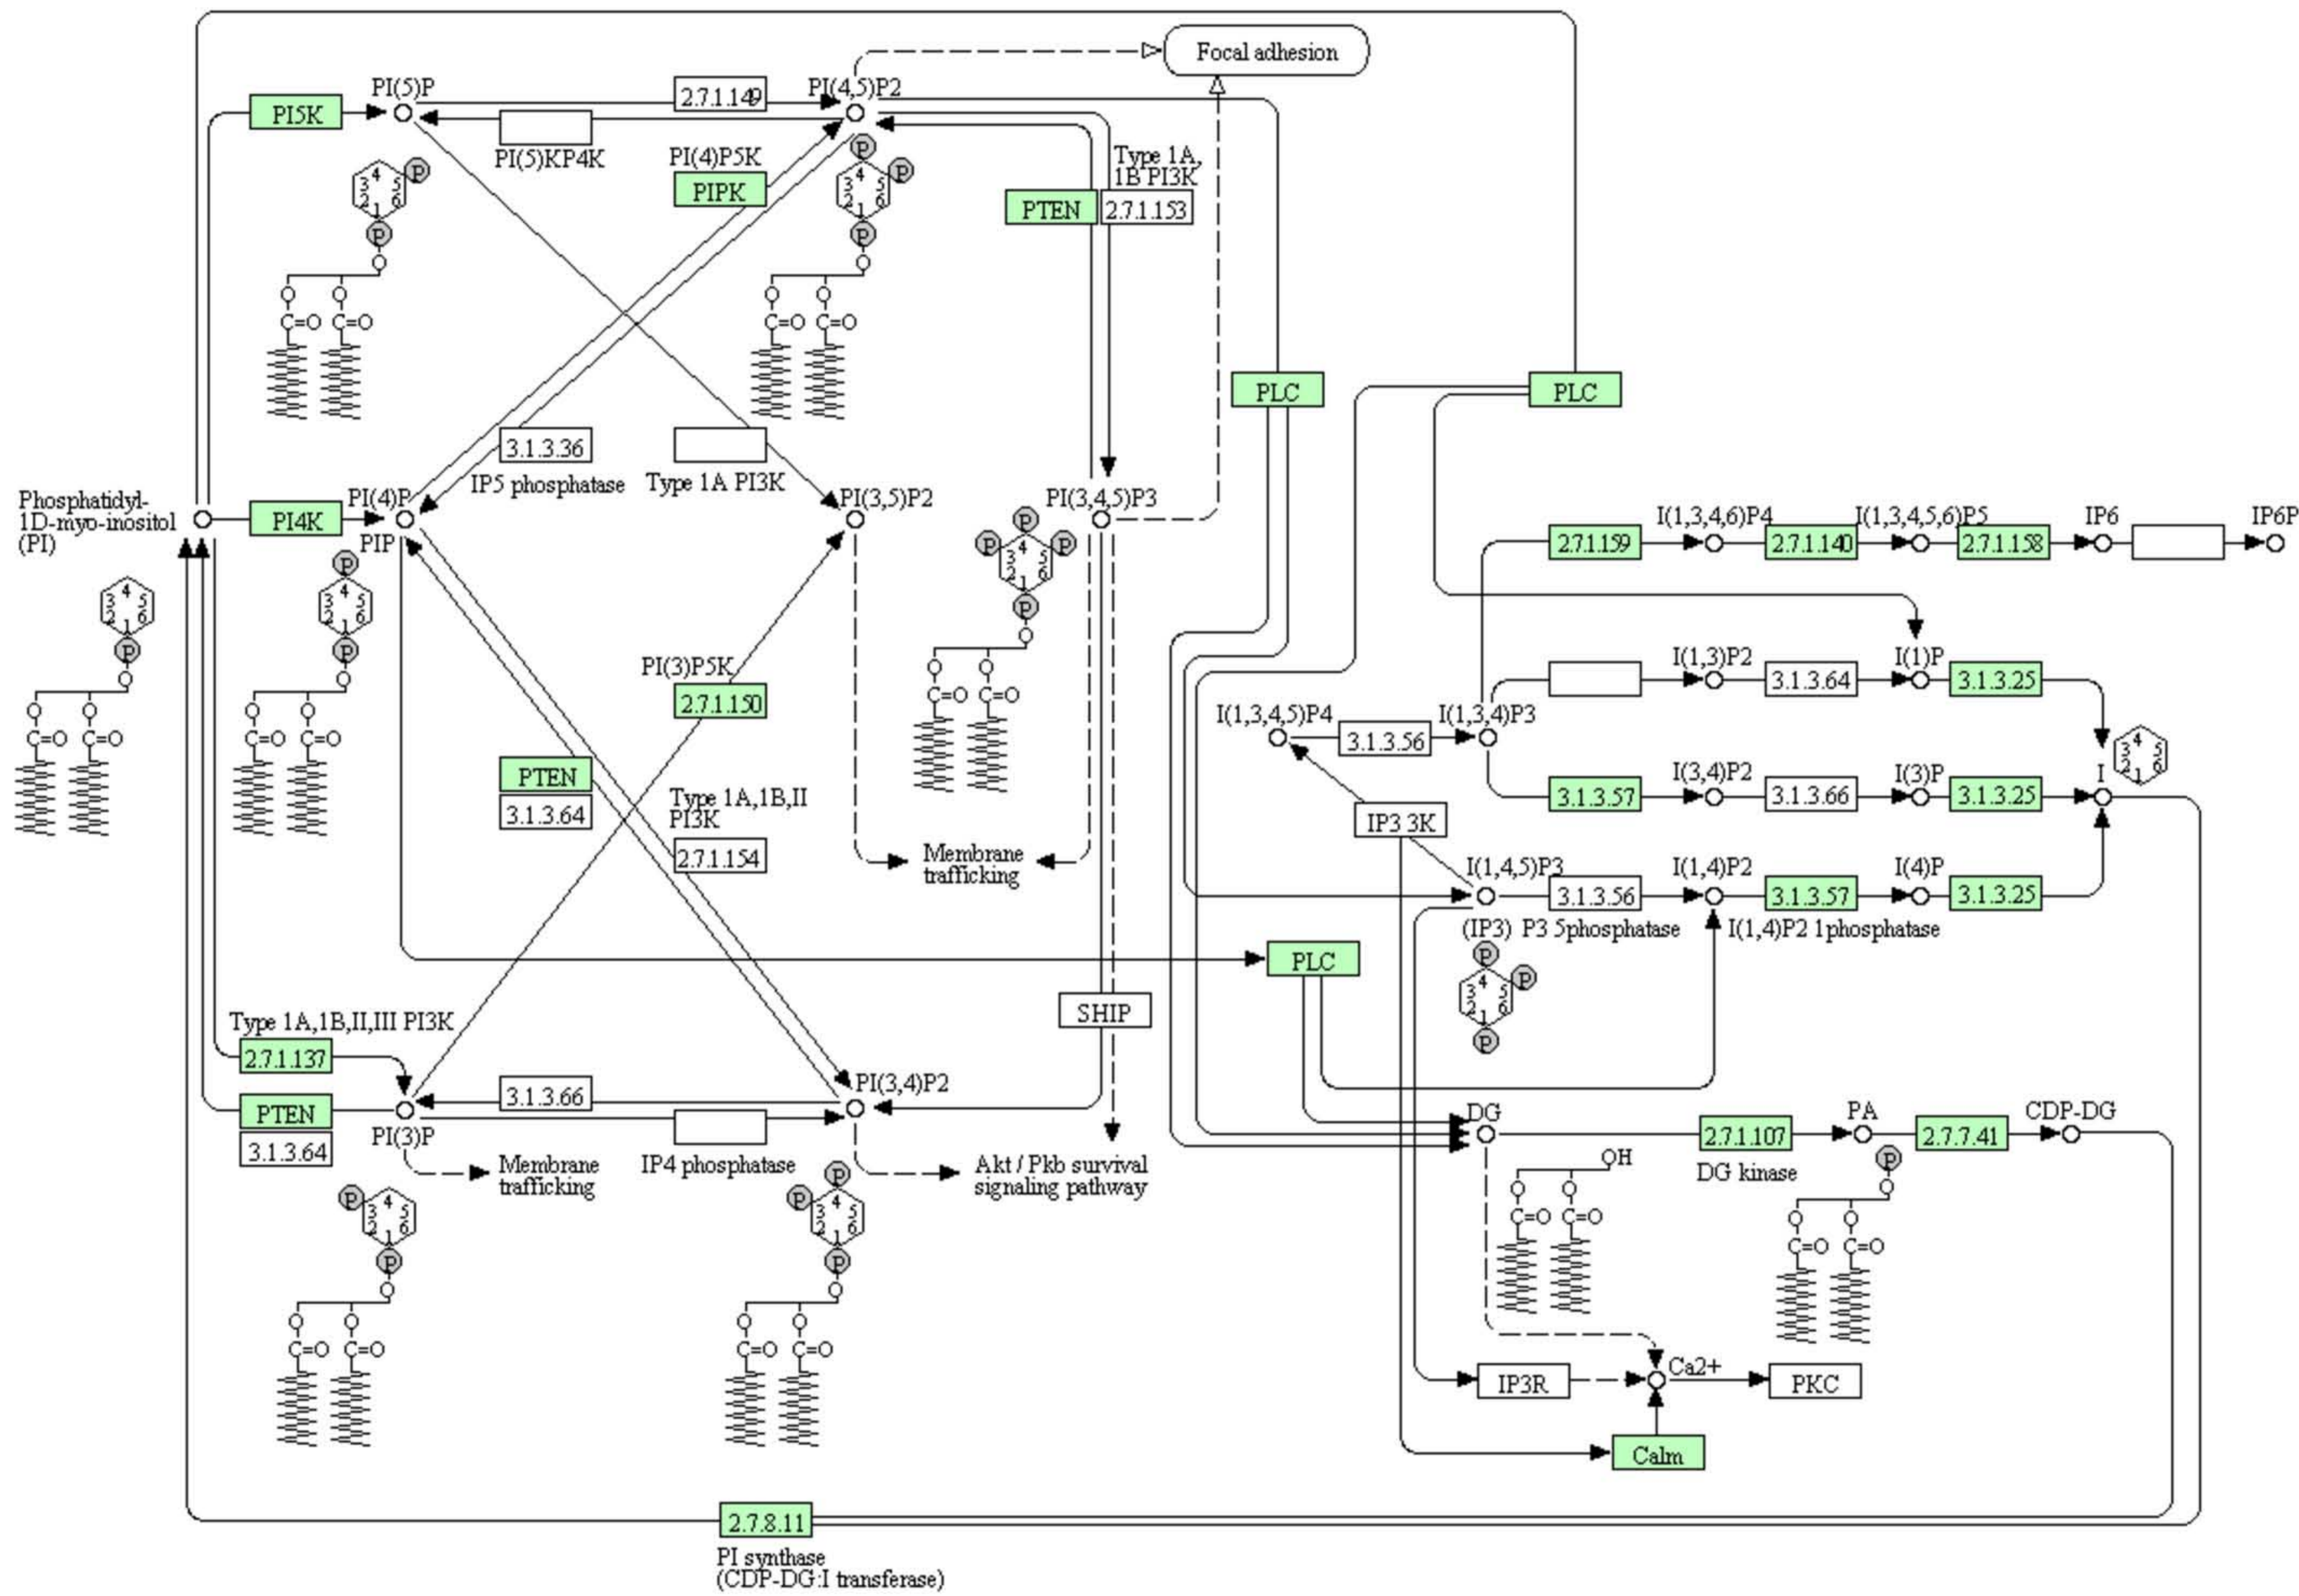







PHOTOSYNTHESIS - ANTENNA PROTEINS

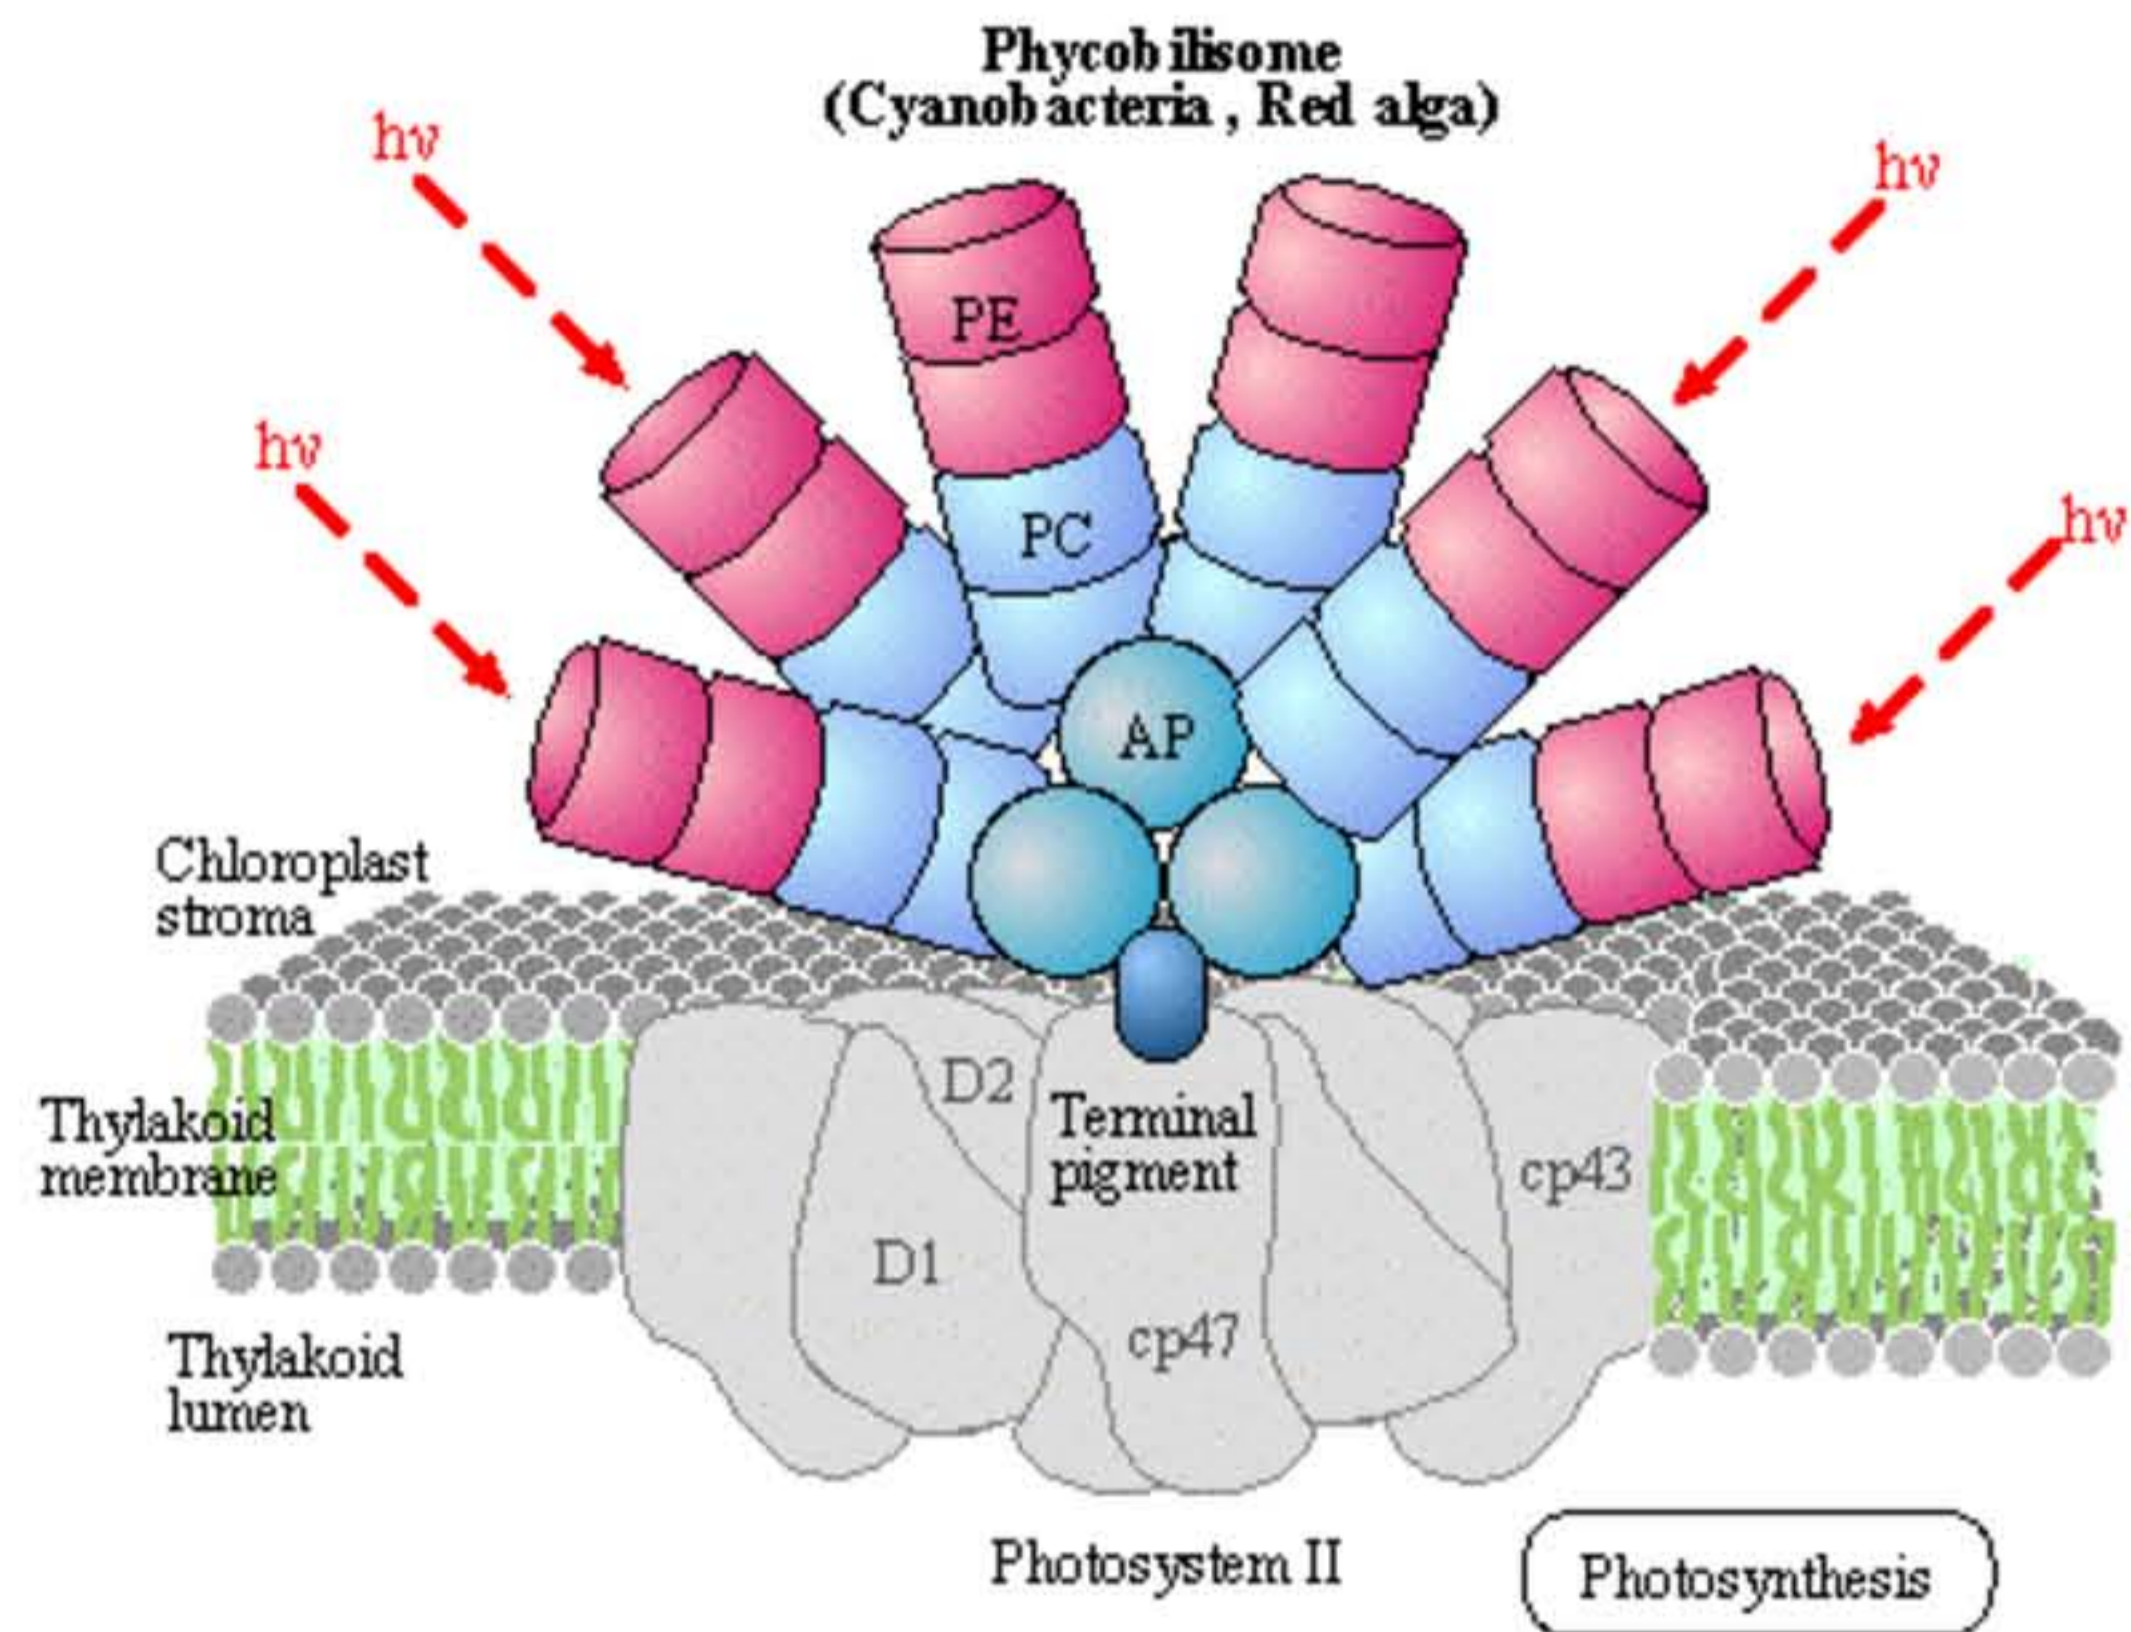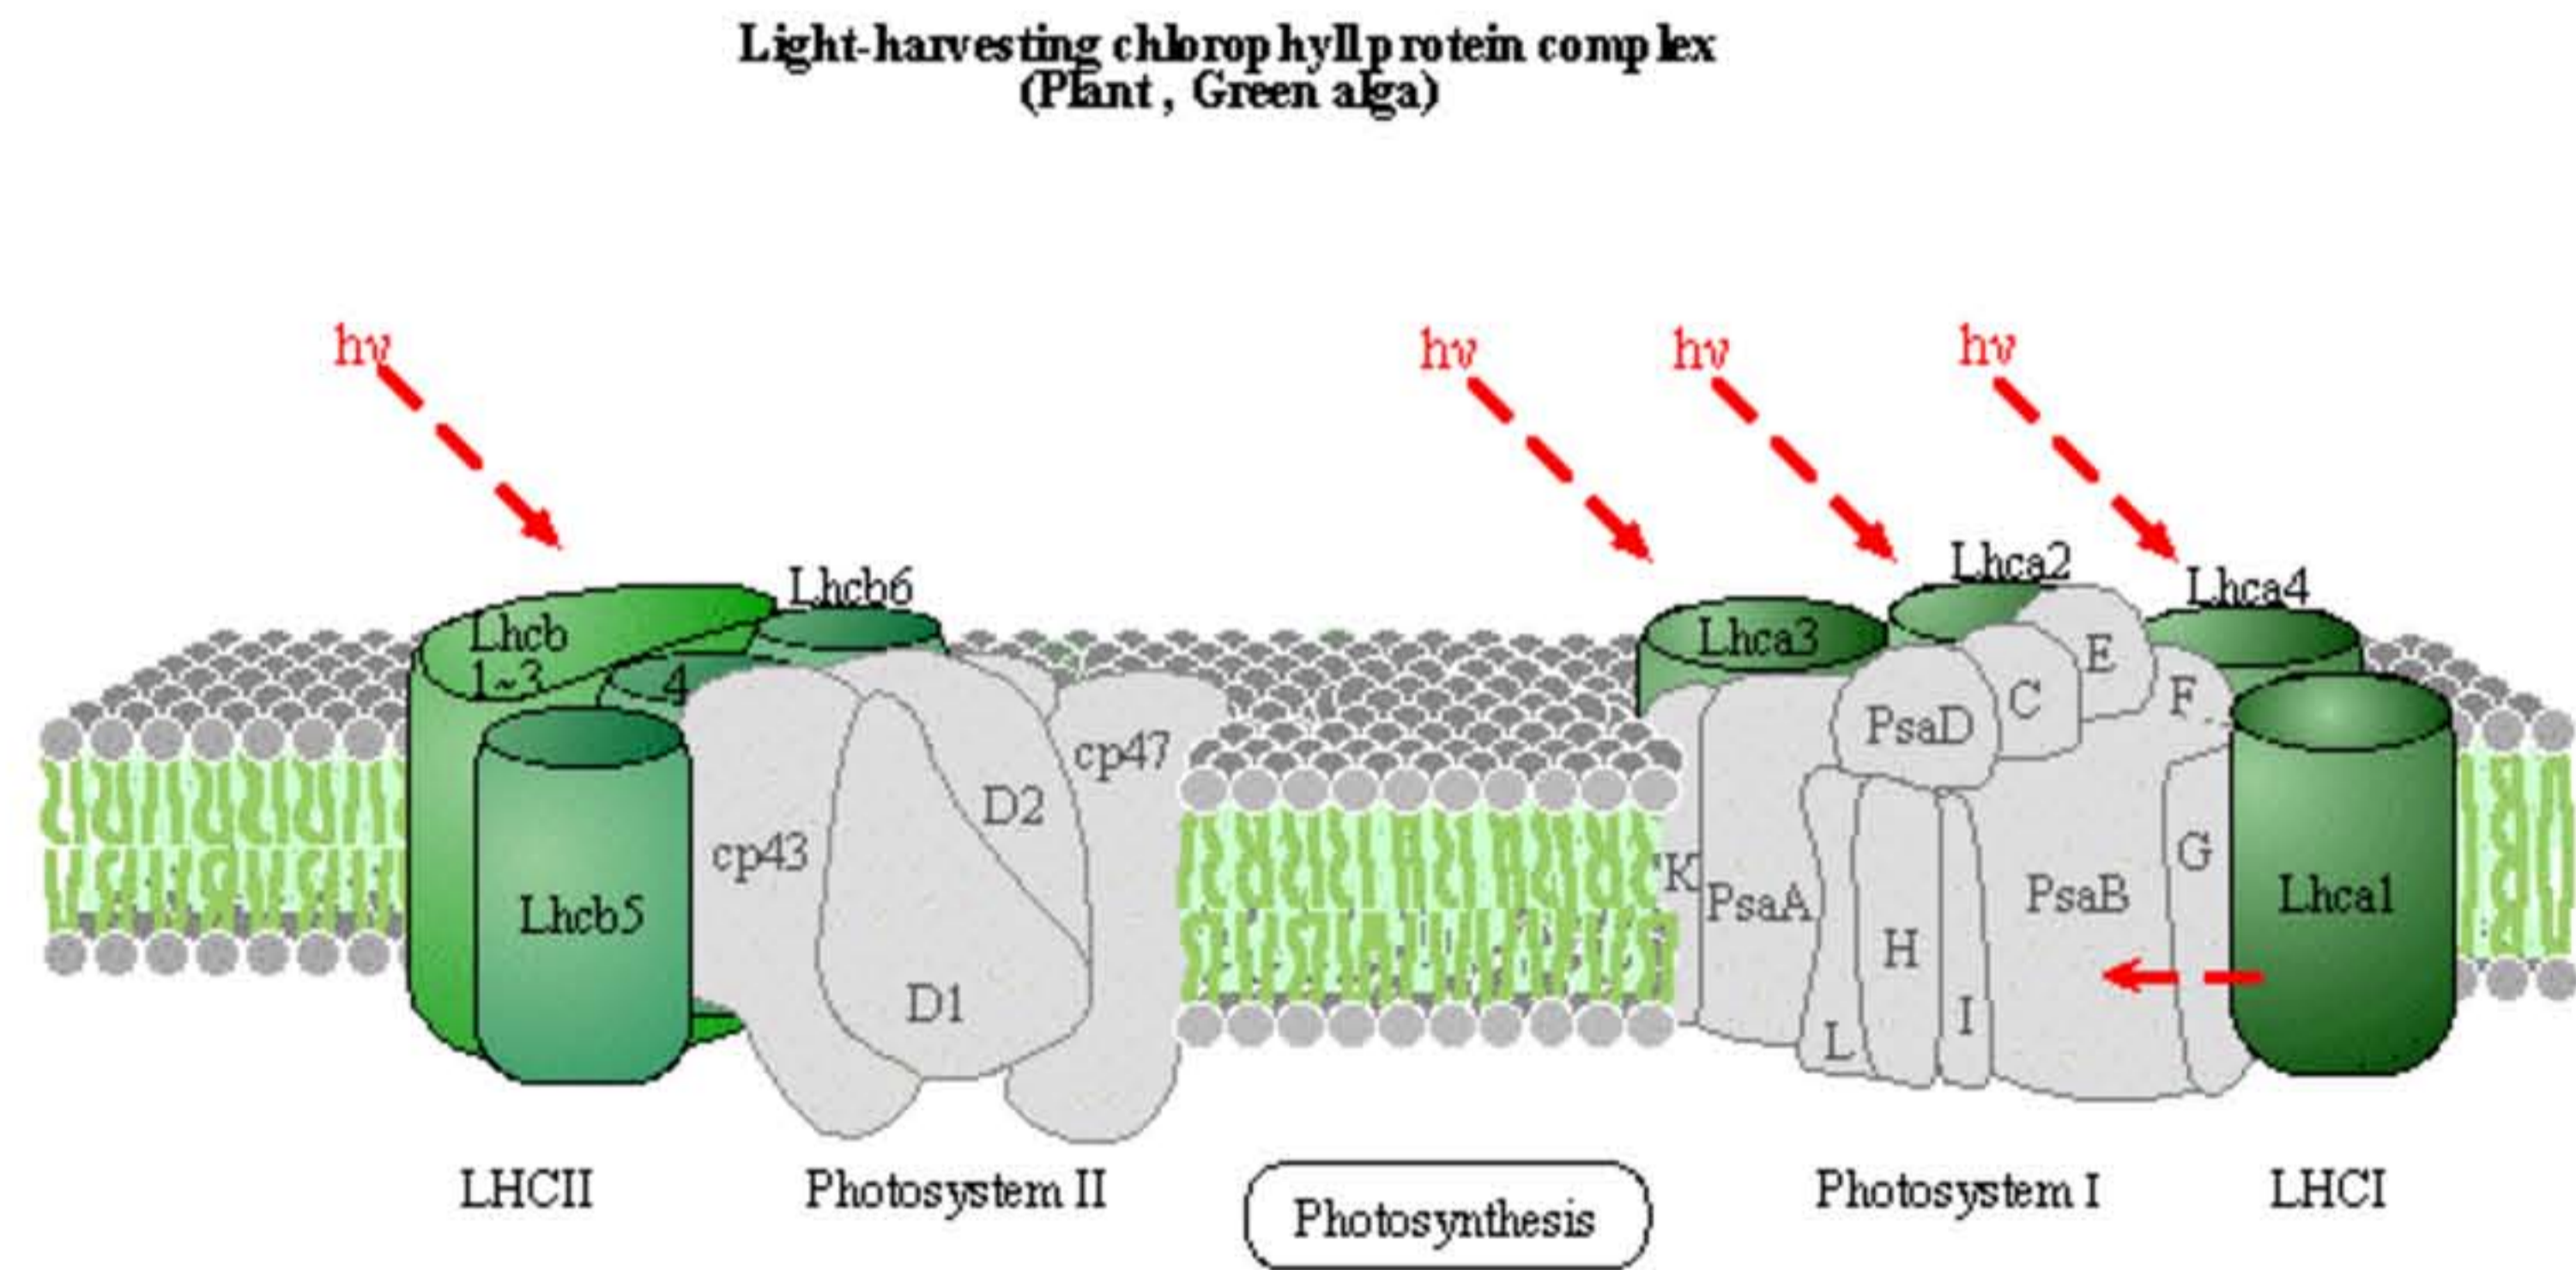

Allophycocyanin(AP)

|      |      |      |      |      |      |
|------|------|------|------|------|------|
| ApcA | ApcB | ApcC | ApcD | ApcE | ApcF |
|------|------|------|------|------|------|

Phycocyanin(PC) / Phycoerythrocyanin(PEC)

|      |      |      |      |      |      |      |
|------|------|------|------|------|------|------|
| CpcA | CpcB | CpcC | CpcD | CpcE | CpcF | CpcG |
|------|------|------|------|------|------|------|

Phycoerythrin(PE)

|      |      |      |      |      |      |      |      |      |      |      |
|------|------|------|------|------|------|------|------|------|------|------|
| CpeA | CpeB | CpeC | CpeD | CpeE | CpeR | CpeS | CpeT | CpeU | CpeY | CpeZ |
|------|------|------|------|------|------|------|------|------|------|------|

Light-harvesting chlorophyll protein complex(LHC)

|       |       |       |       |       |
|-------|-------|-------|-------|-------|
| Lhca1 | Lhca2 | Lhca3 | Lhca4 | Lhca5 |
|-------|-------|-------|-------|-------|

|       |       |       |       |       |       |       |
|-------|-------|-------|-------|-------|-------|-------|
| Lhcb1 | Lhcb2 | Lhcb3 | Lhcb4 | Lhcb5 | Lhcb6 | Lhcb7 |
|-------|-------|-------|-------|-------|-------|-------|



# PHOTOSYNTHESIS

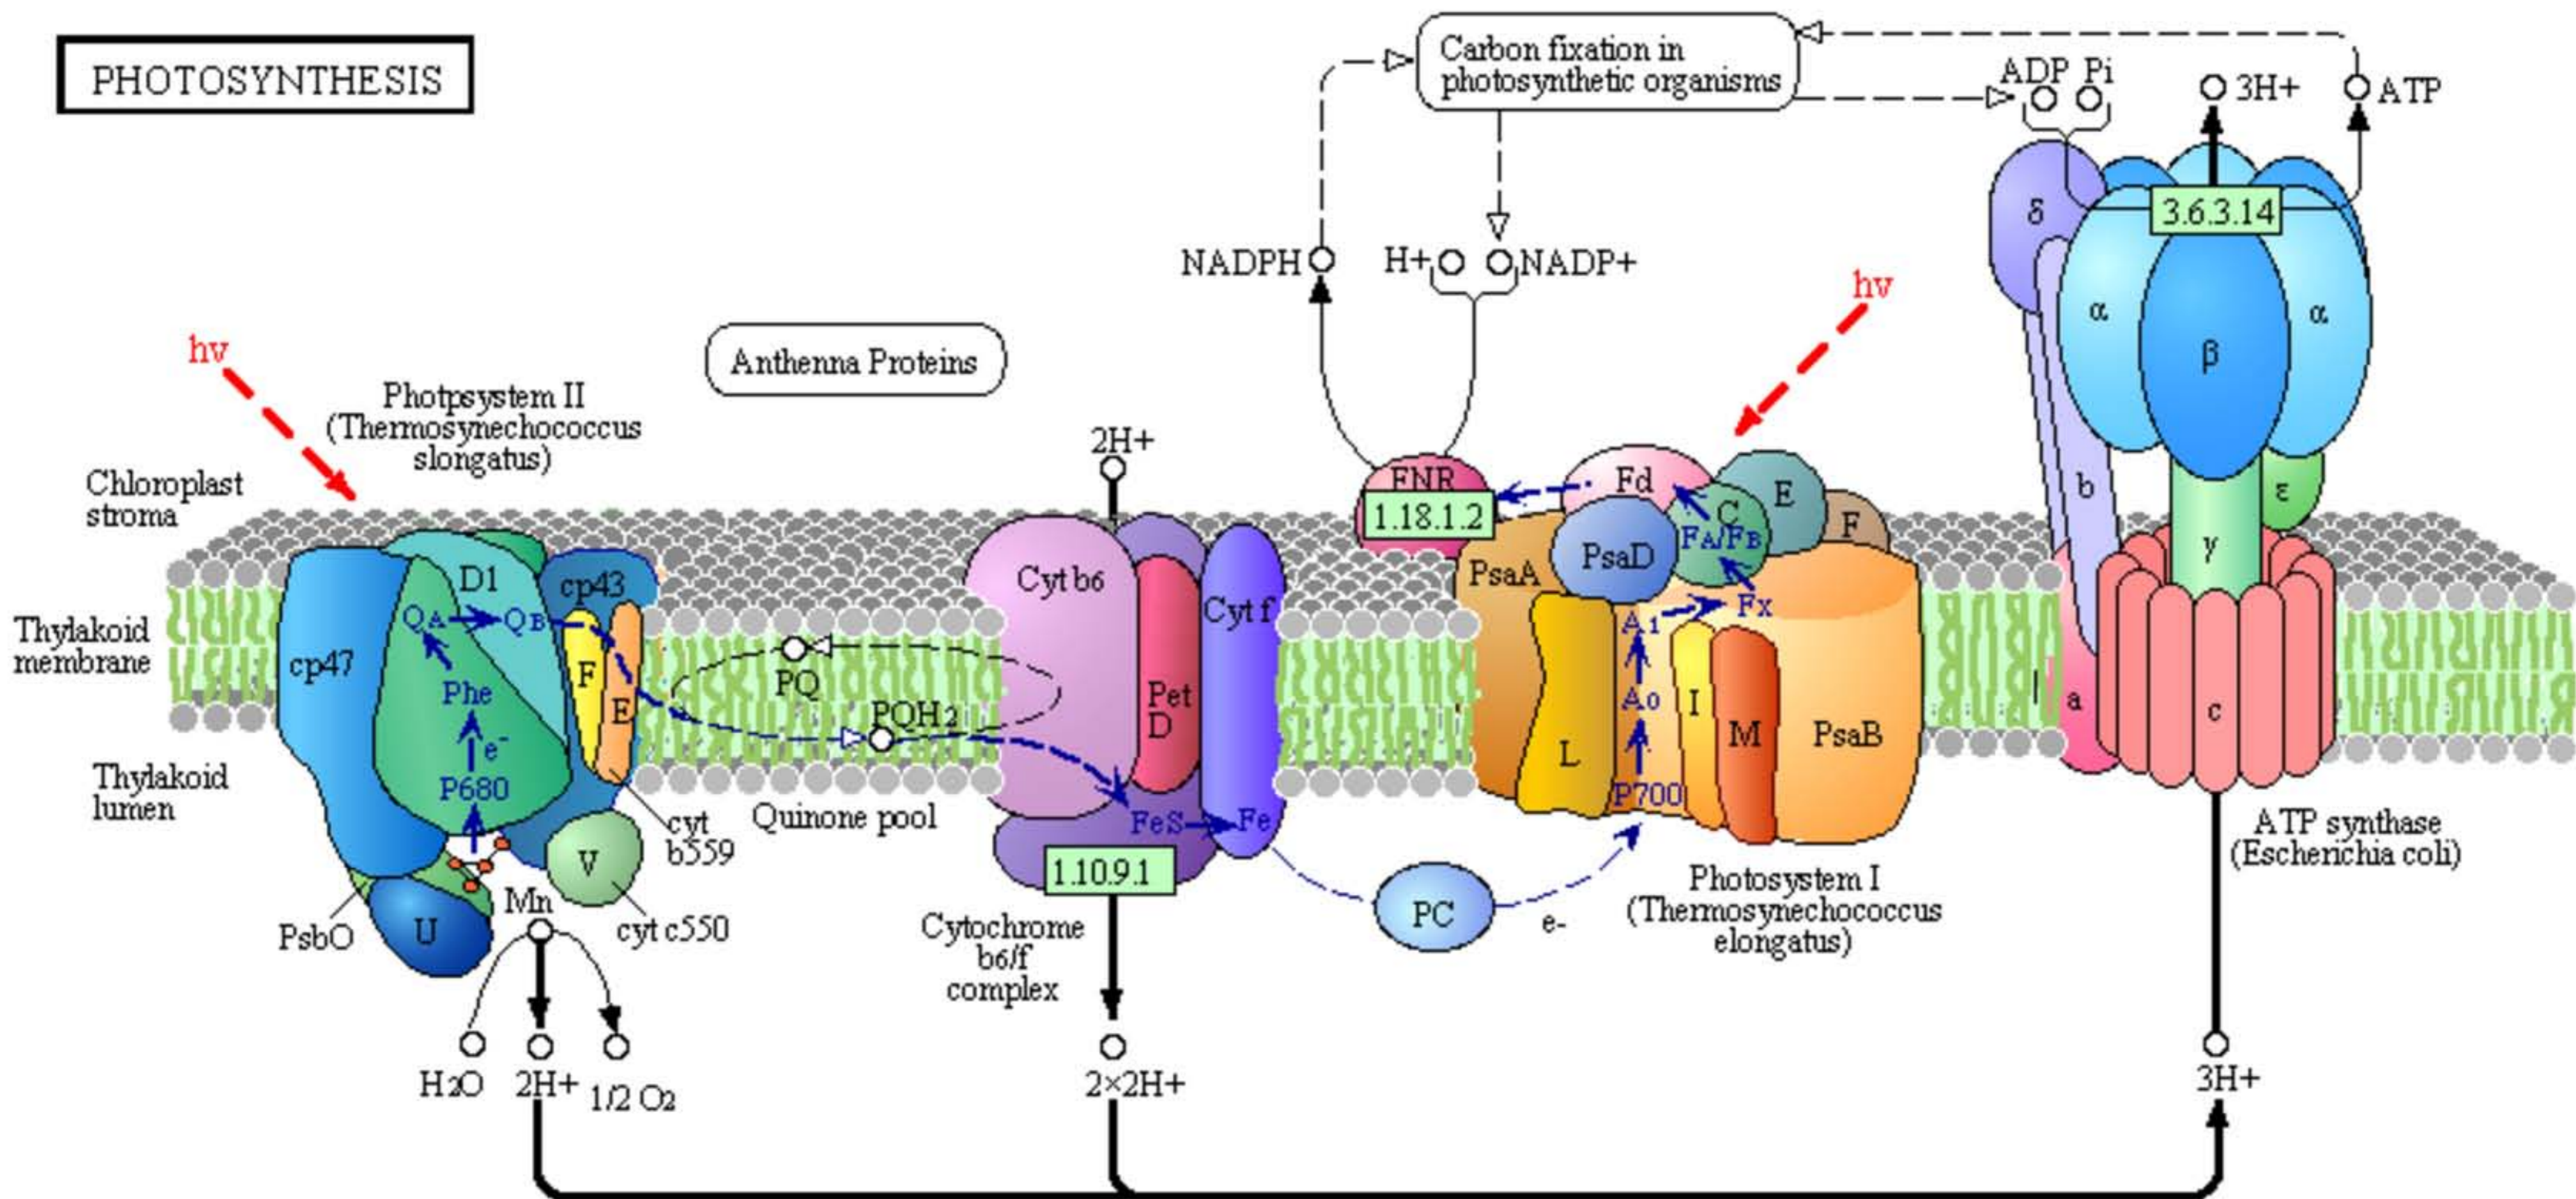

## Photosystem II

|      |      |       |       |          |      |      |      |  |
|------|------|-------|-------|----------|------|------|------|--|
| D1   | D2   | cp43  | cp47  | cyt b559 |      |      |      |  |
| PsbA | PsbD | PsbC  | PsbB  | PsbE     | PsbF |      |      |  |
|      |      |       |       |          |      | MSP  | OEC  |  |
| PsbL | PsbJ | PsbK  | PsbM  | PsbH     | PsbI | PsbO | PsbP |  |
| PsbQ | PsbR | PsbS  | PsbT  | PsbU     | PsbV | PsbW | PsbX |  |
| PsbY | PsbZ | Psb27 | Psb28 | Psb28-2  |      |      |      |  |

## Photosystem I

|      |      |      |      |      |      |      |      |
|------|------|------|------|------|------|------|------|
| PsaA | PsaB | PsaC | PsaD | PsaE | PsaF | PsaG | PsaH |
| PsaI | PsaJ | PsaK | PsaL | PsaM | PsaN | PsaO | PsaX |

## Cytochrome $b_6/f$ complex

|      |      |      |      |      |      |      |      |
|------|------|------|------|------|------|------|------|
| PetB | PetD | PetA | PetC | PetL | PetM | PetN | PetG |
|------|------|------|------|------|------|------|------|

## Photosynthetic electron transport

|      |      |      |        |
|------|------|------|--------|
| PC   | Fd   | FNR  | cyt c6 |
| PetE | PetF | PetH | PetJ   |

## F-type ATPase

|      |       |       |       |         |   |   |   |
|------|-------|-------|-------|---------|---|---|---|
| beta | alpha | gamma | delta | epsilon | c | a | b |
|------|-------|-------|-------|---------|---|---|---|



**PI3K-AKT SIGNALING PATHWAY**

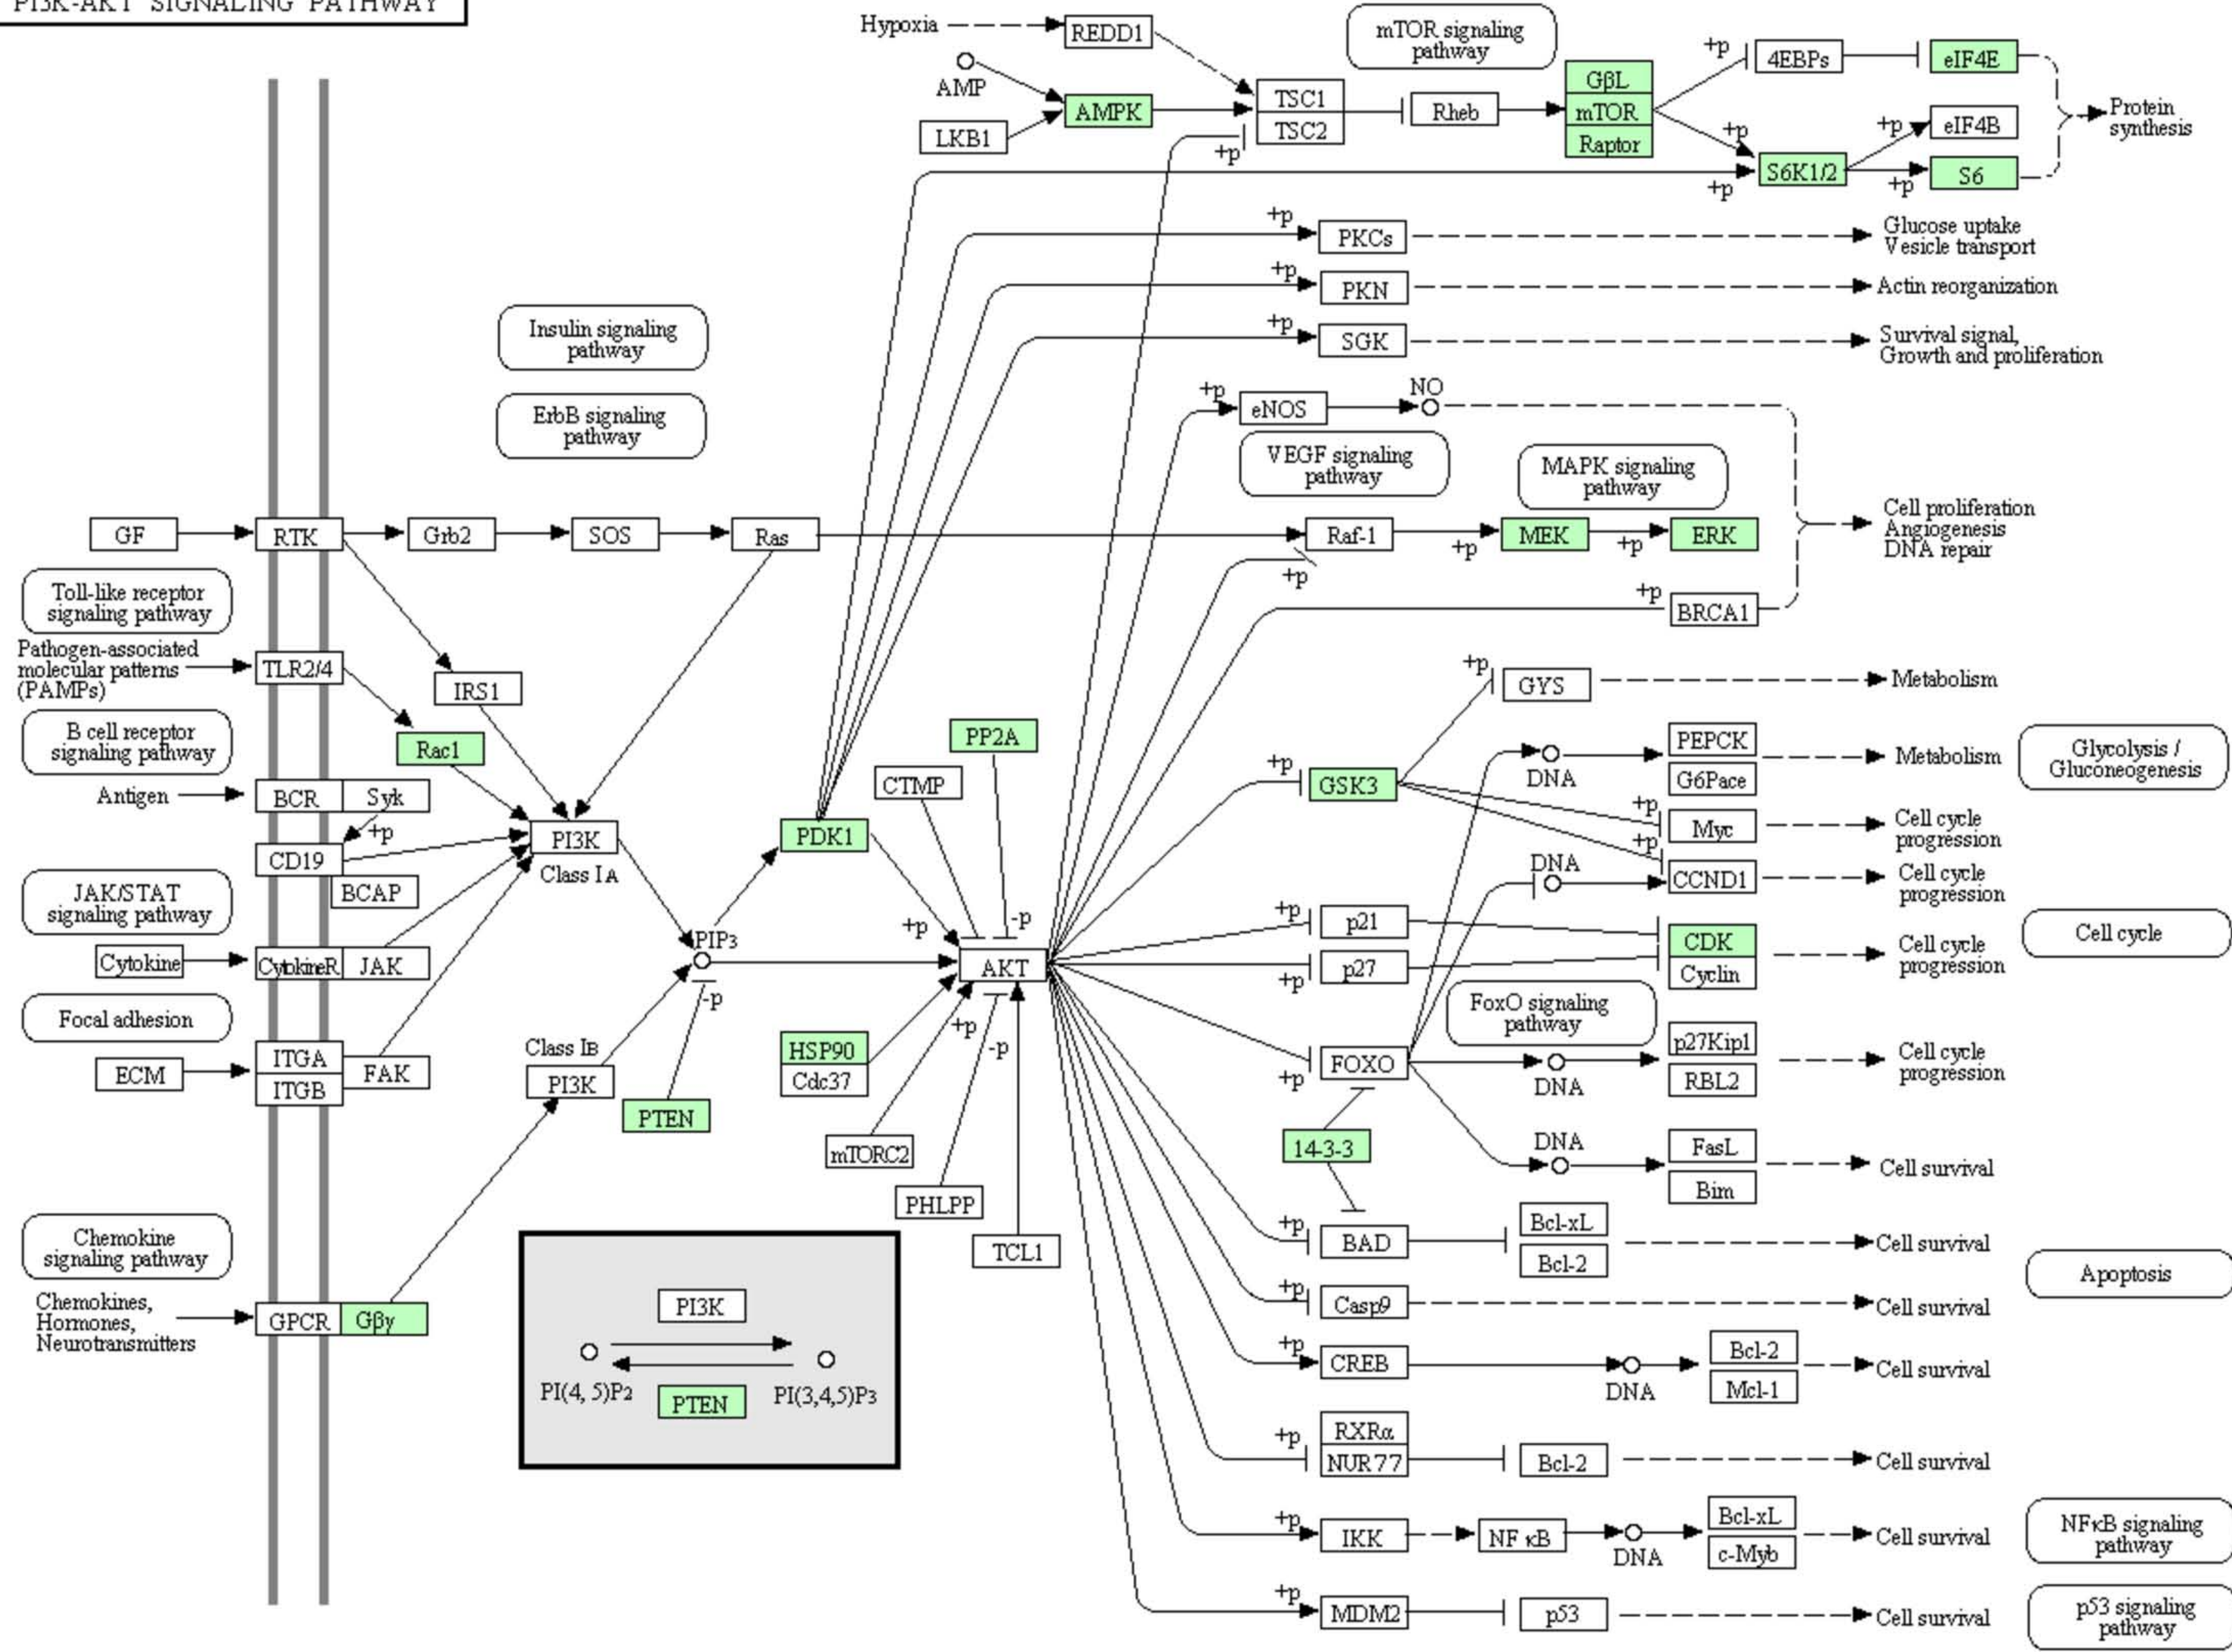



PLANT HORMONE SIGNAL TRANSDUCTION

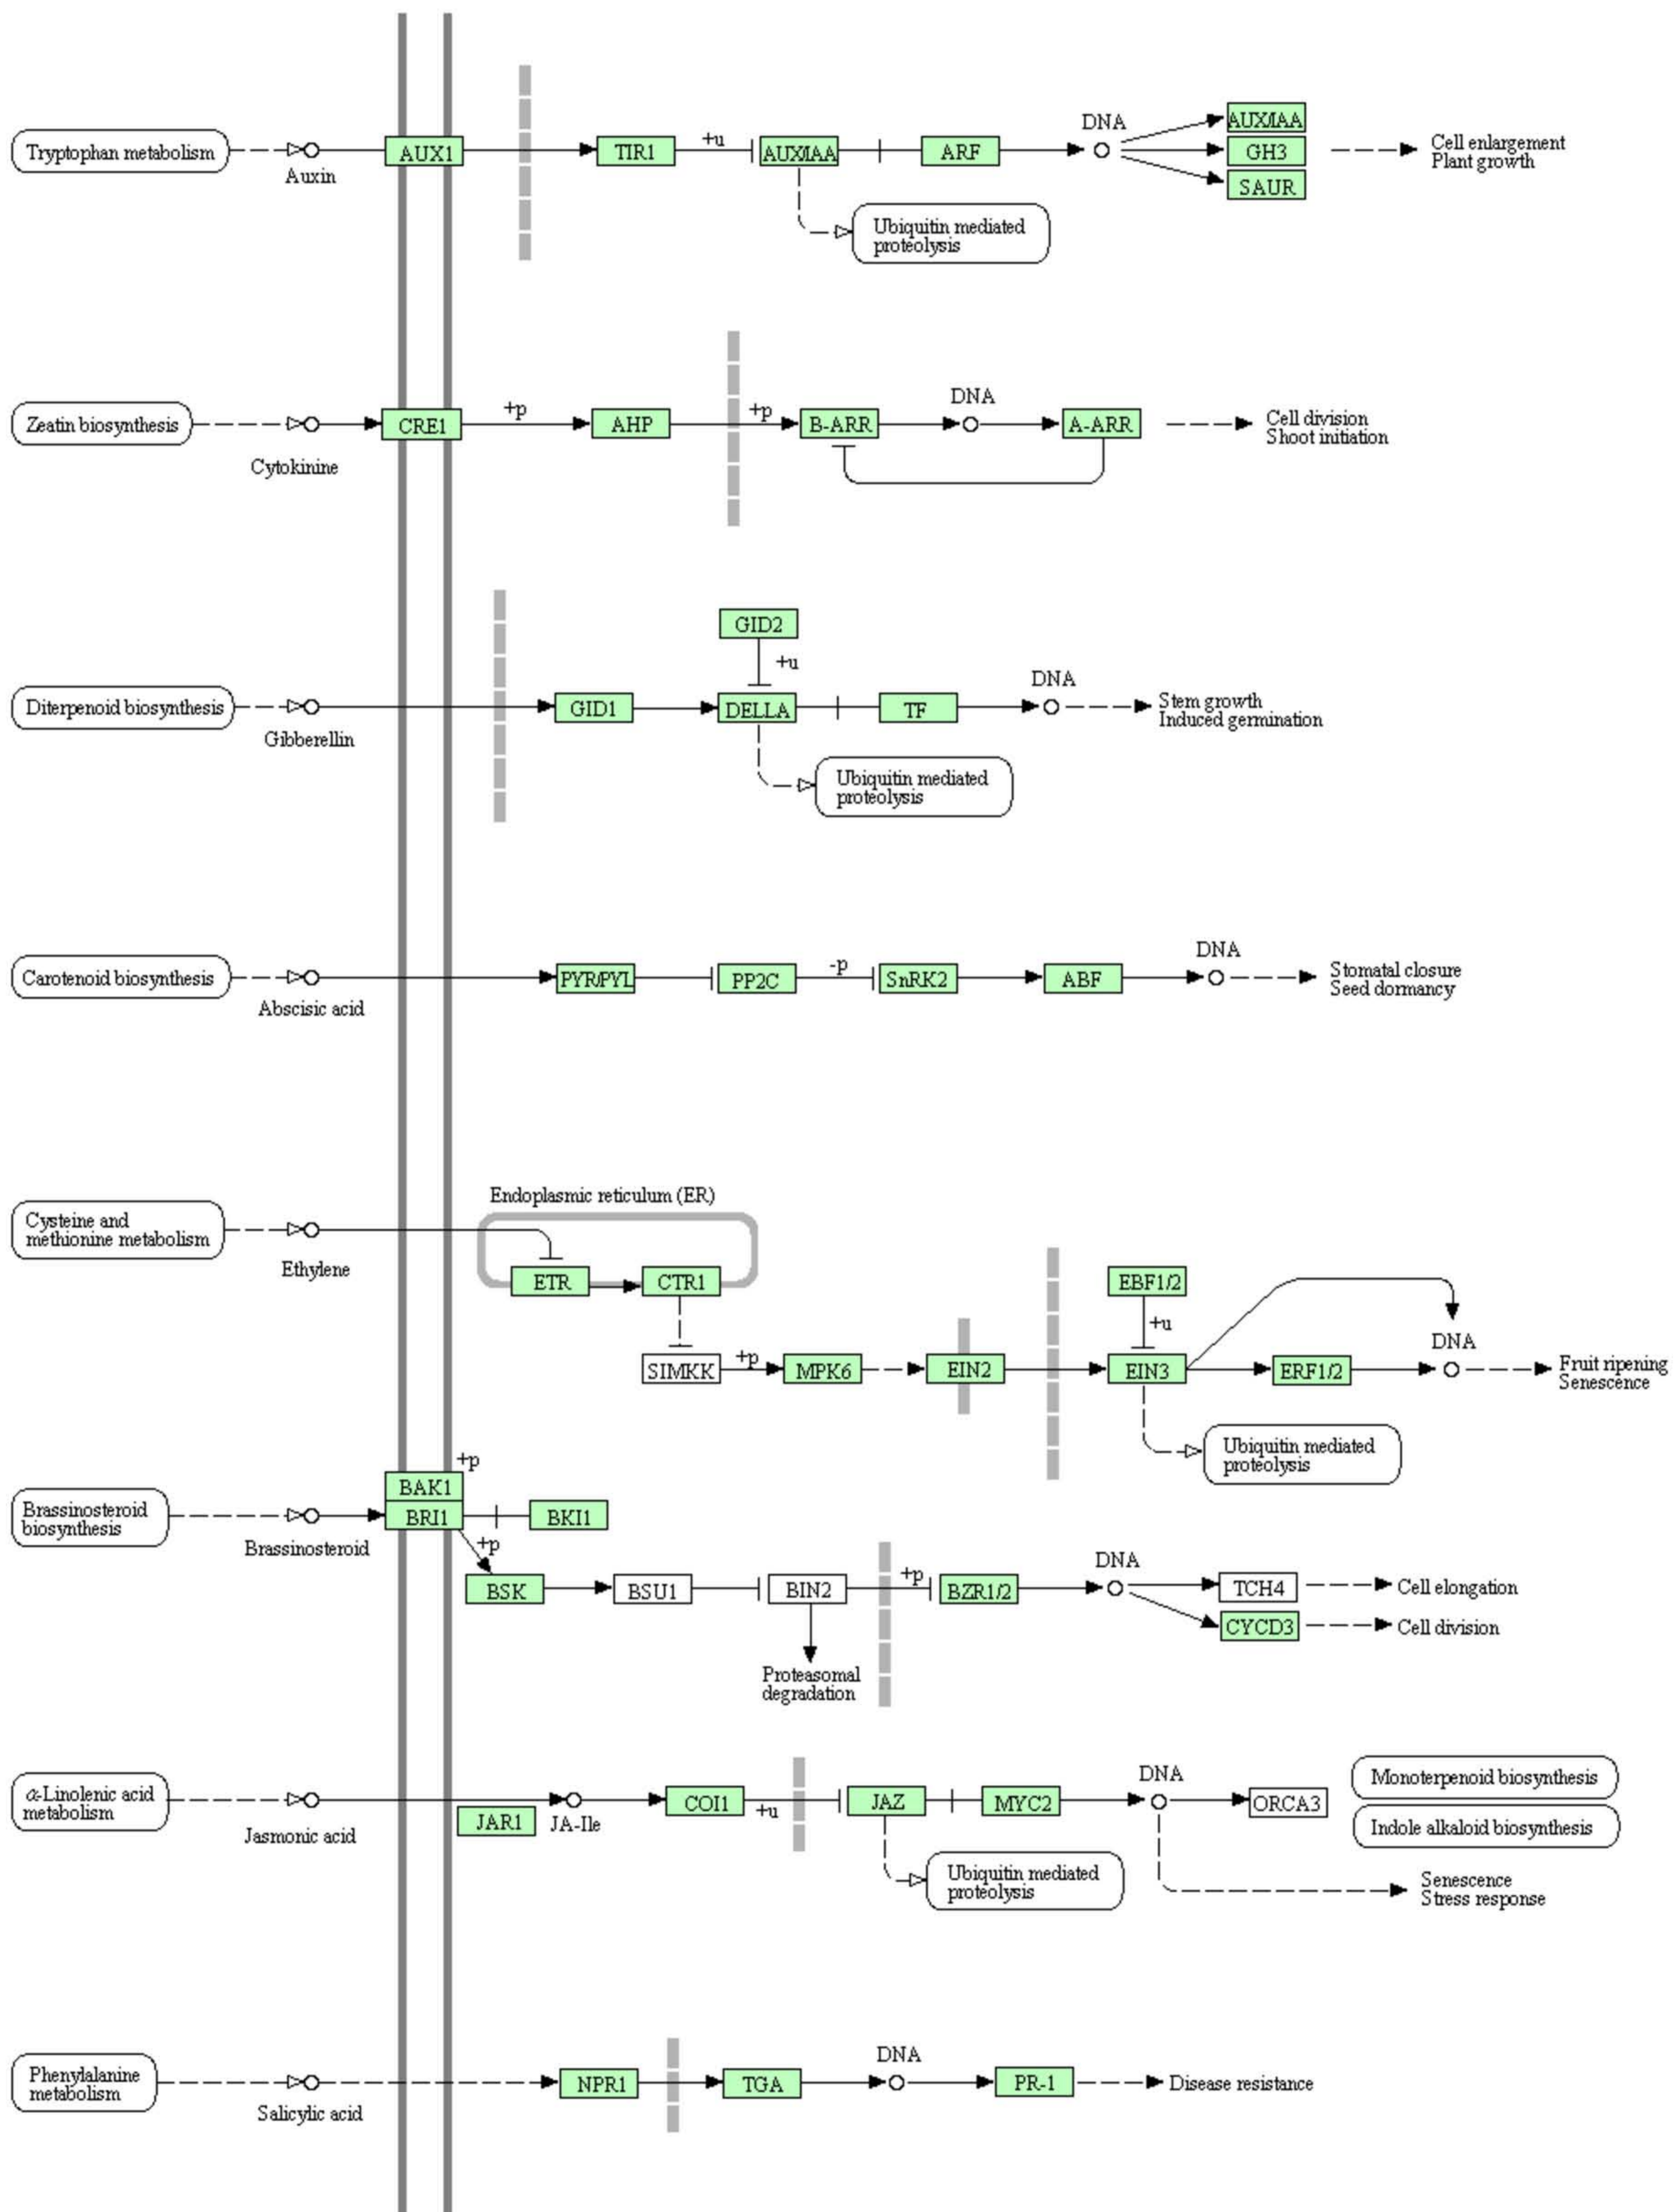



PLANT-PATHOGEN INTERACTION

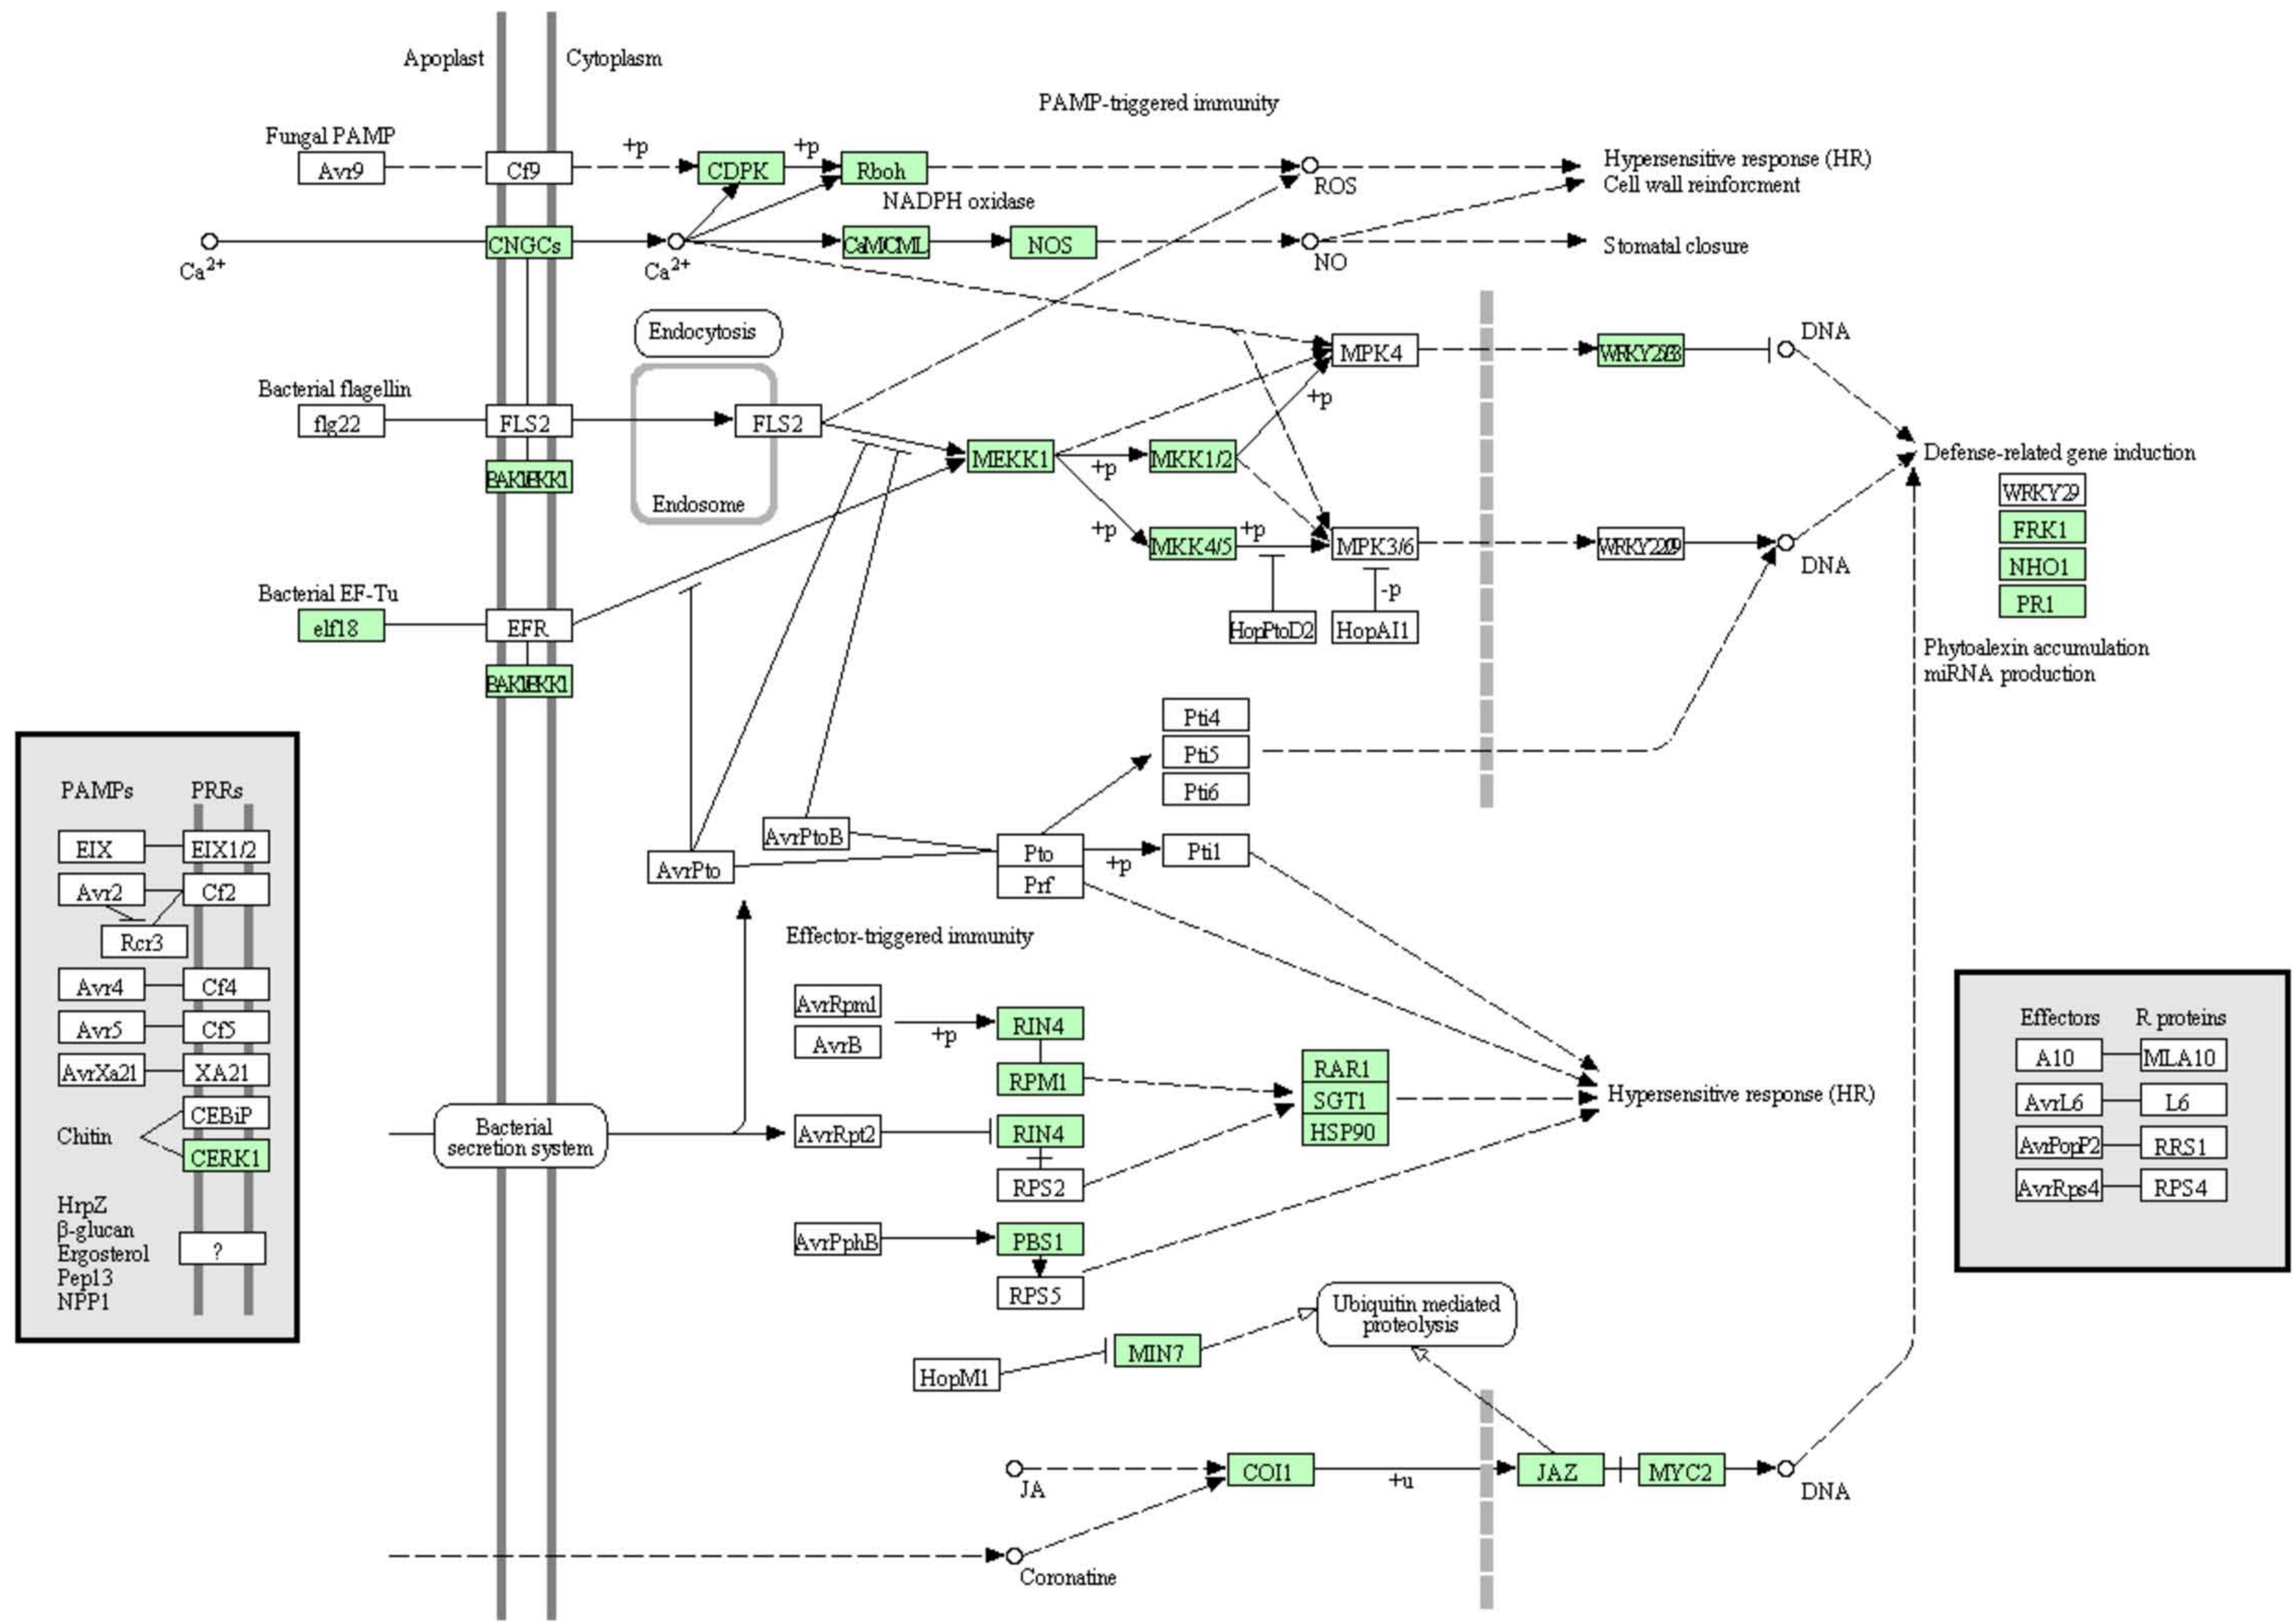















PROPANOATE METABOLISM

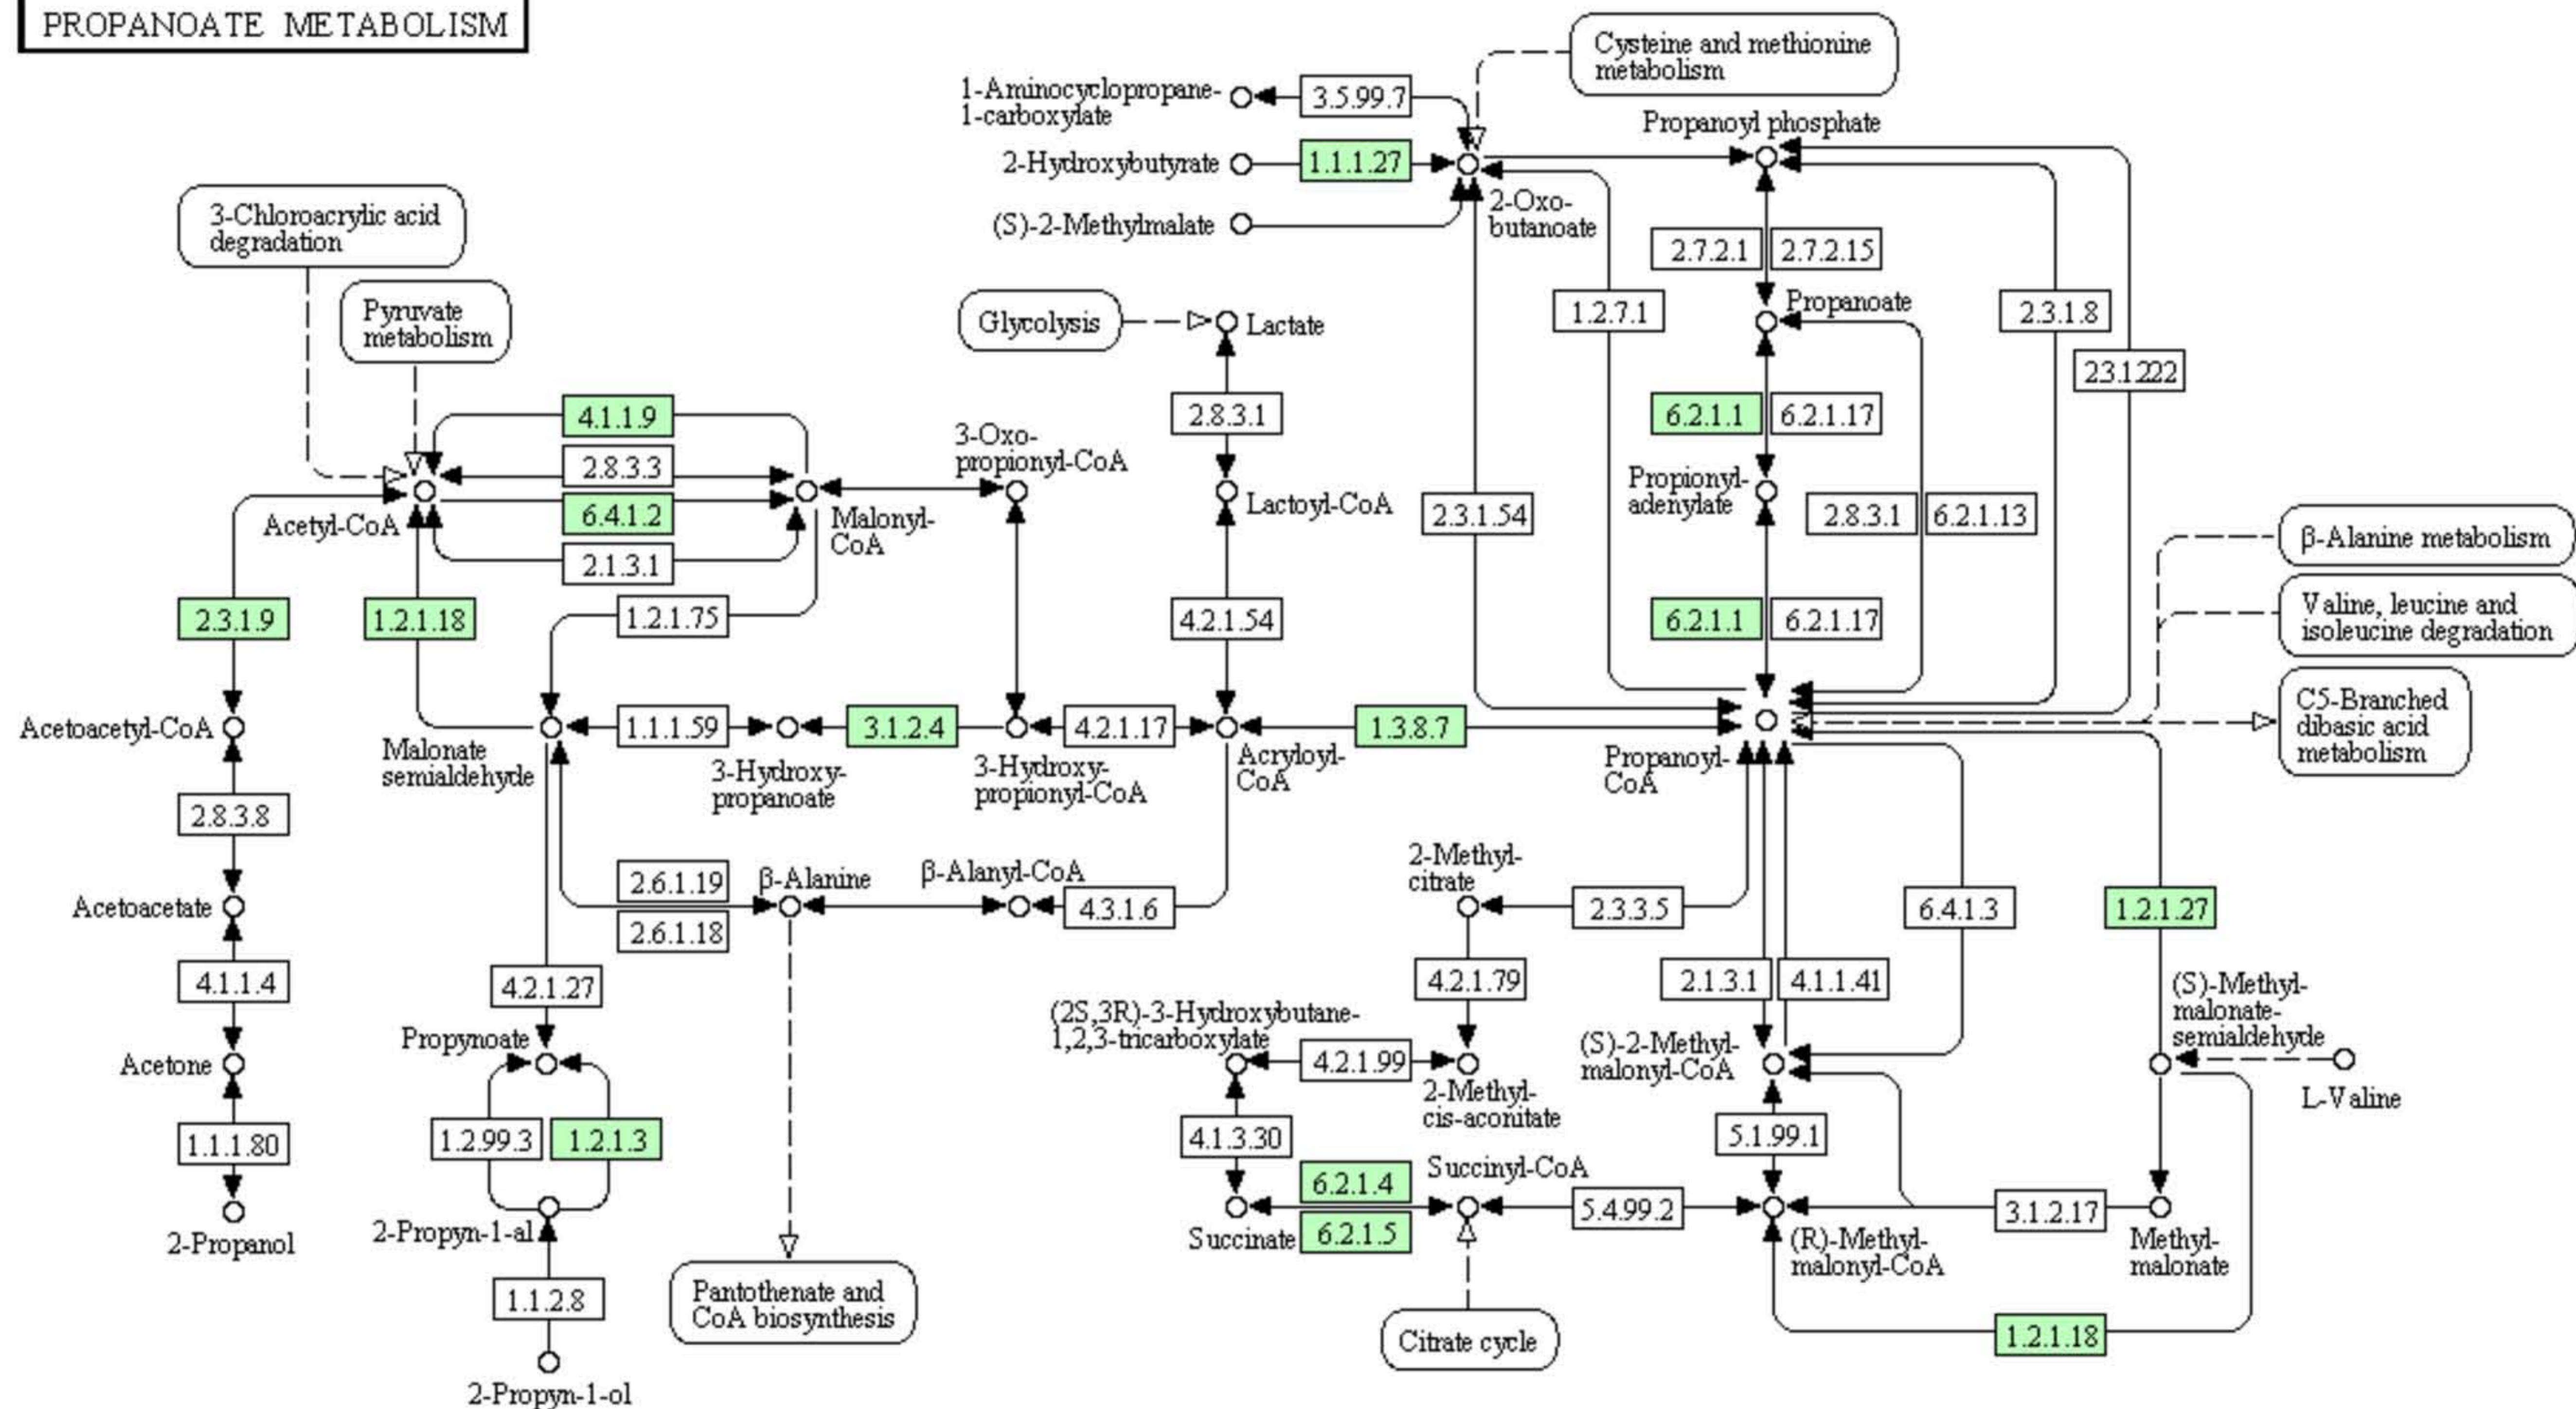



**PROTEASOME**

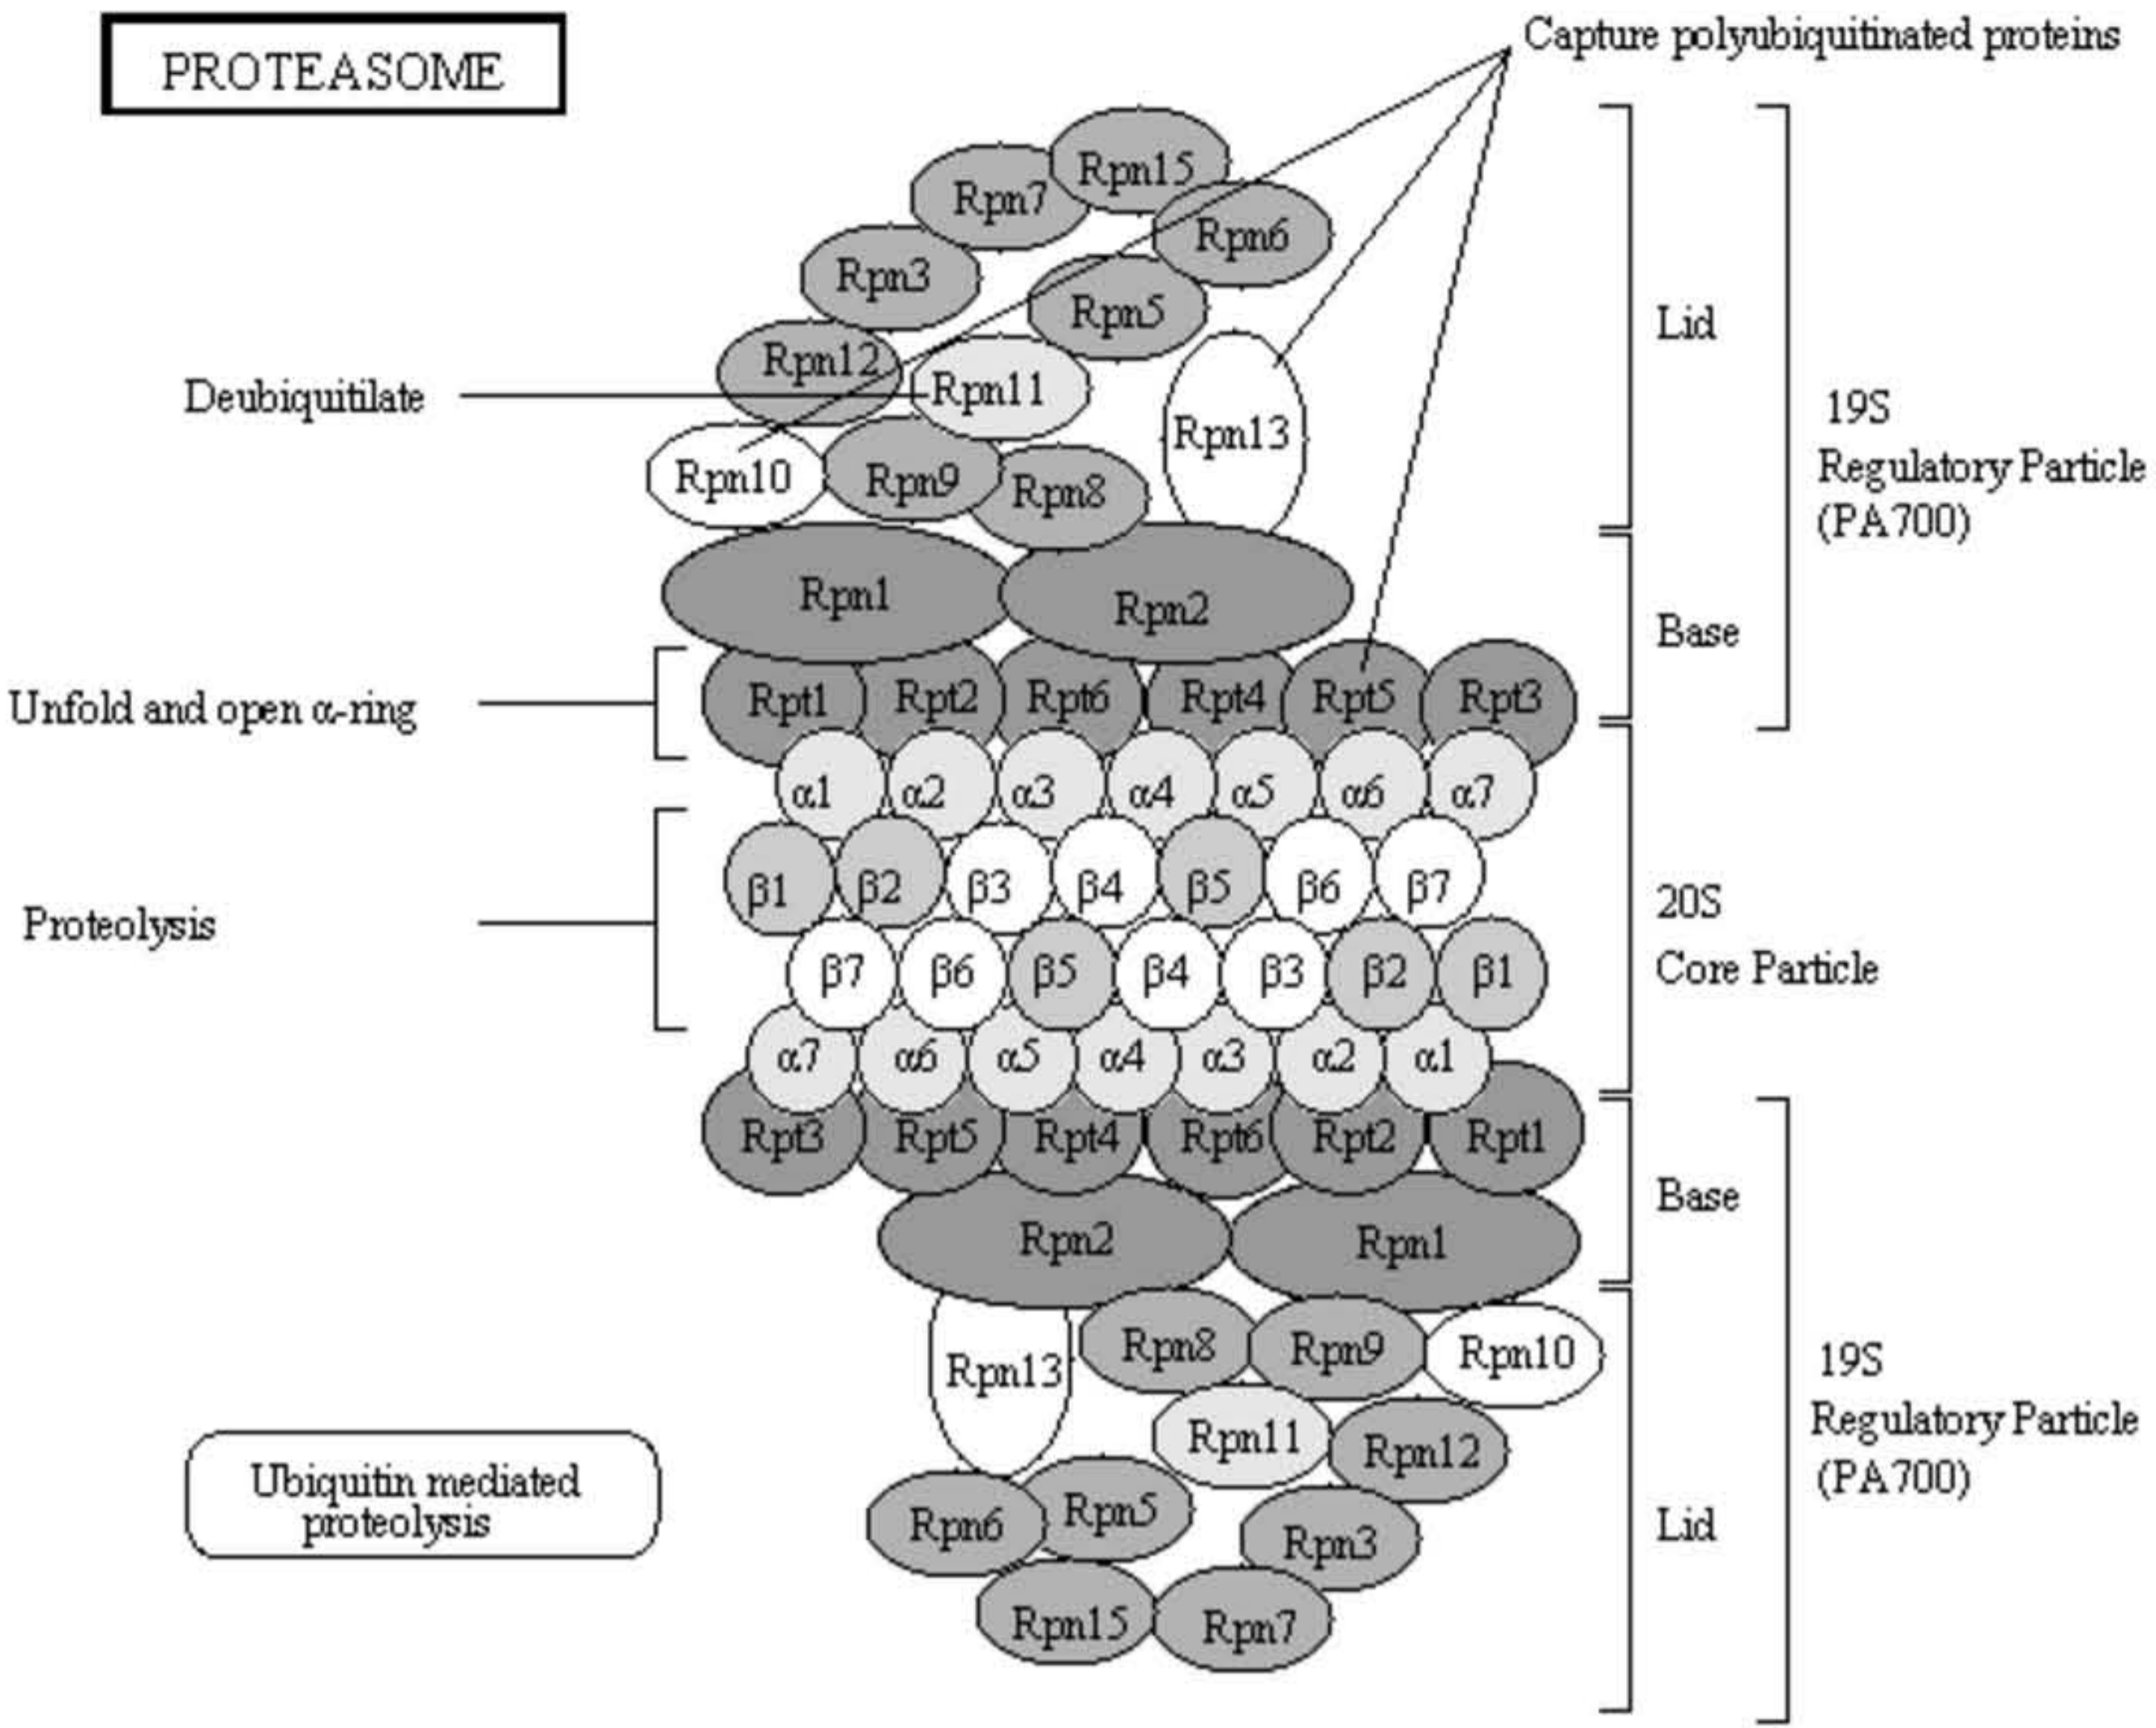

PA700-20S-PA700  
(26S proteasome)

Regulatory Particles

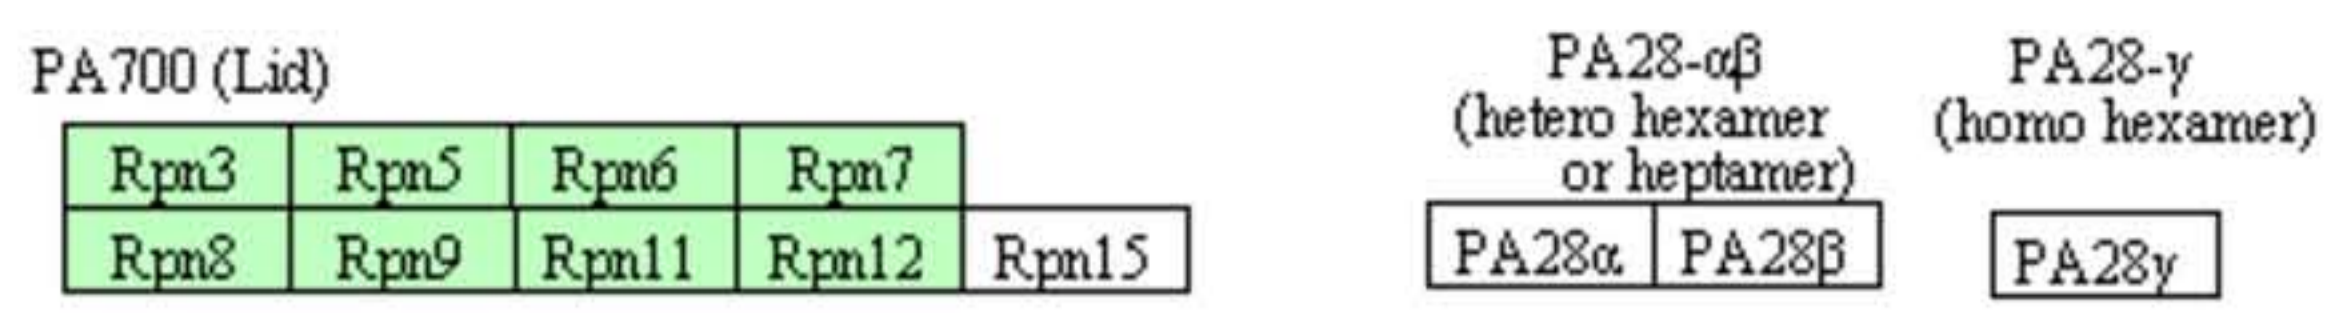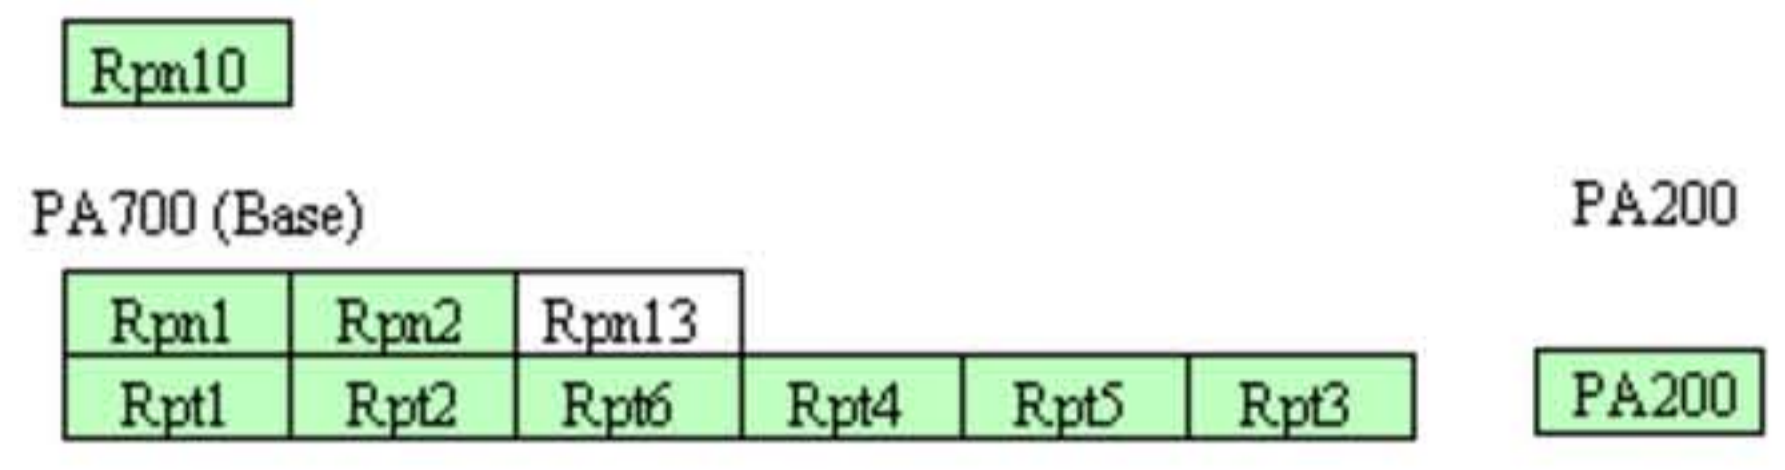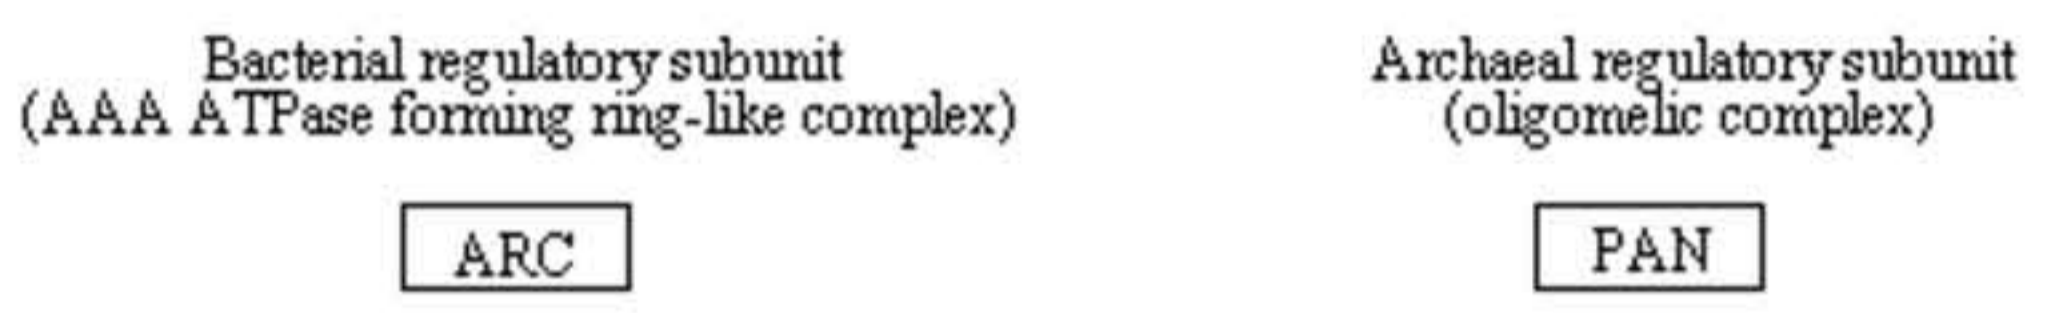

Core Particles (20S proteasome)

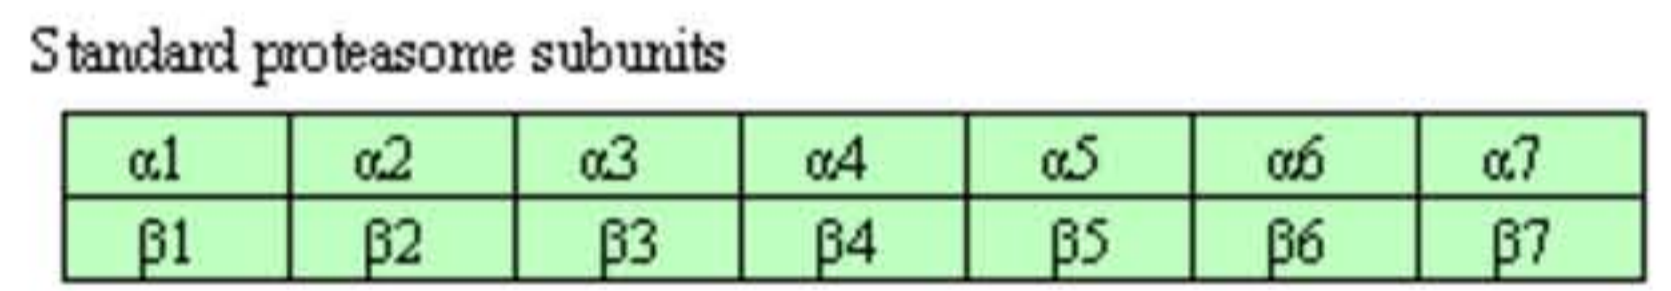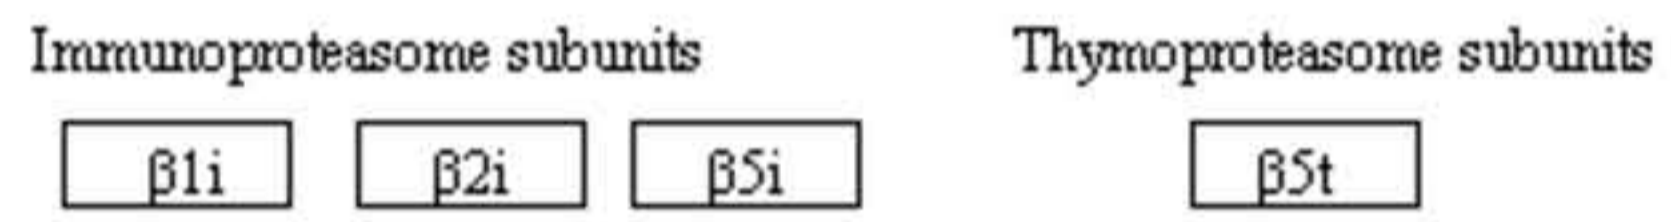

Prokaryotic 20S subunits

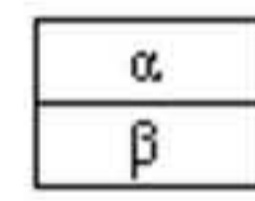

Formation of immunoproteasomes

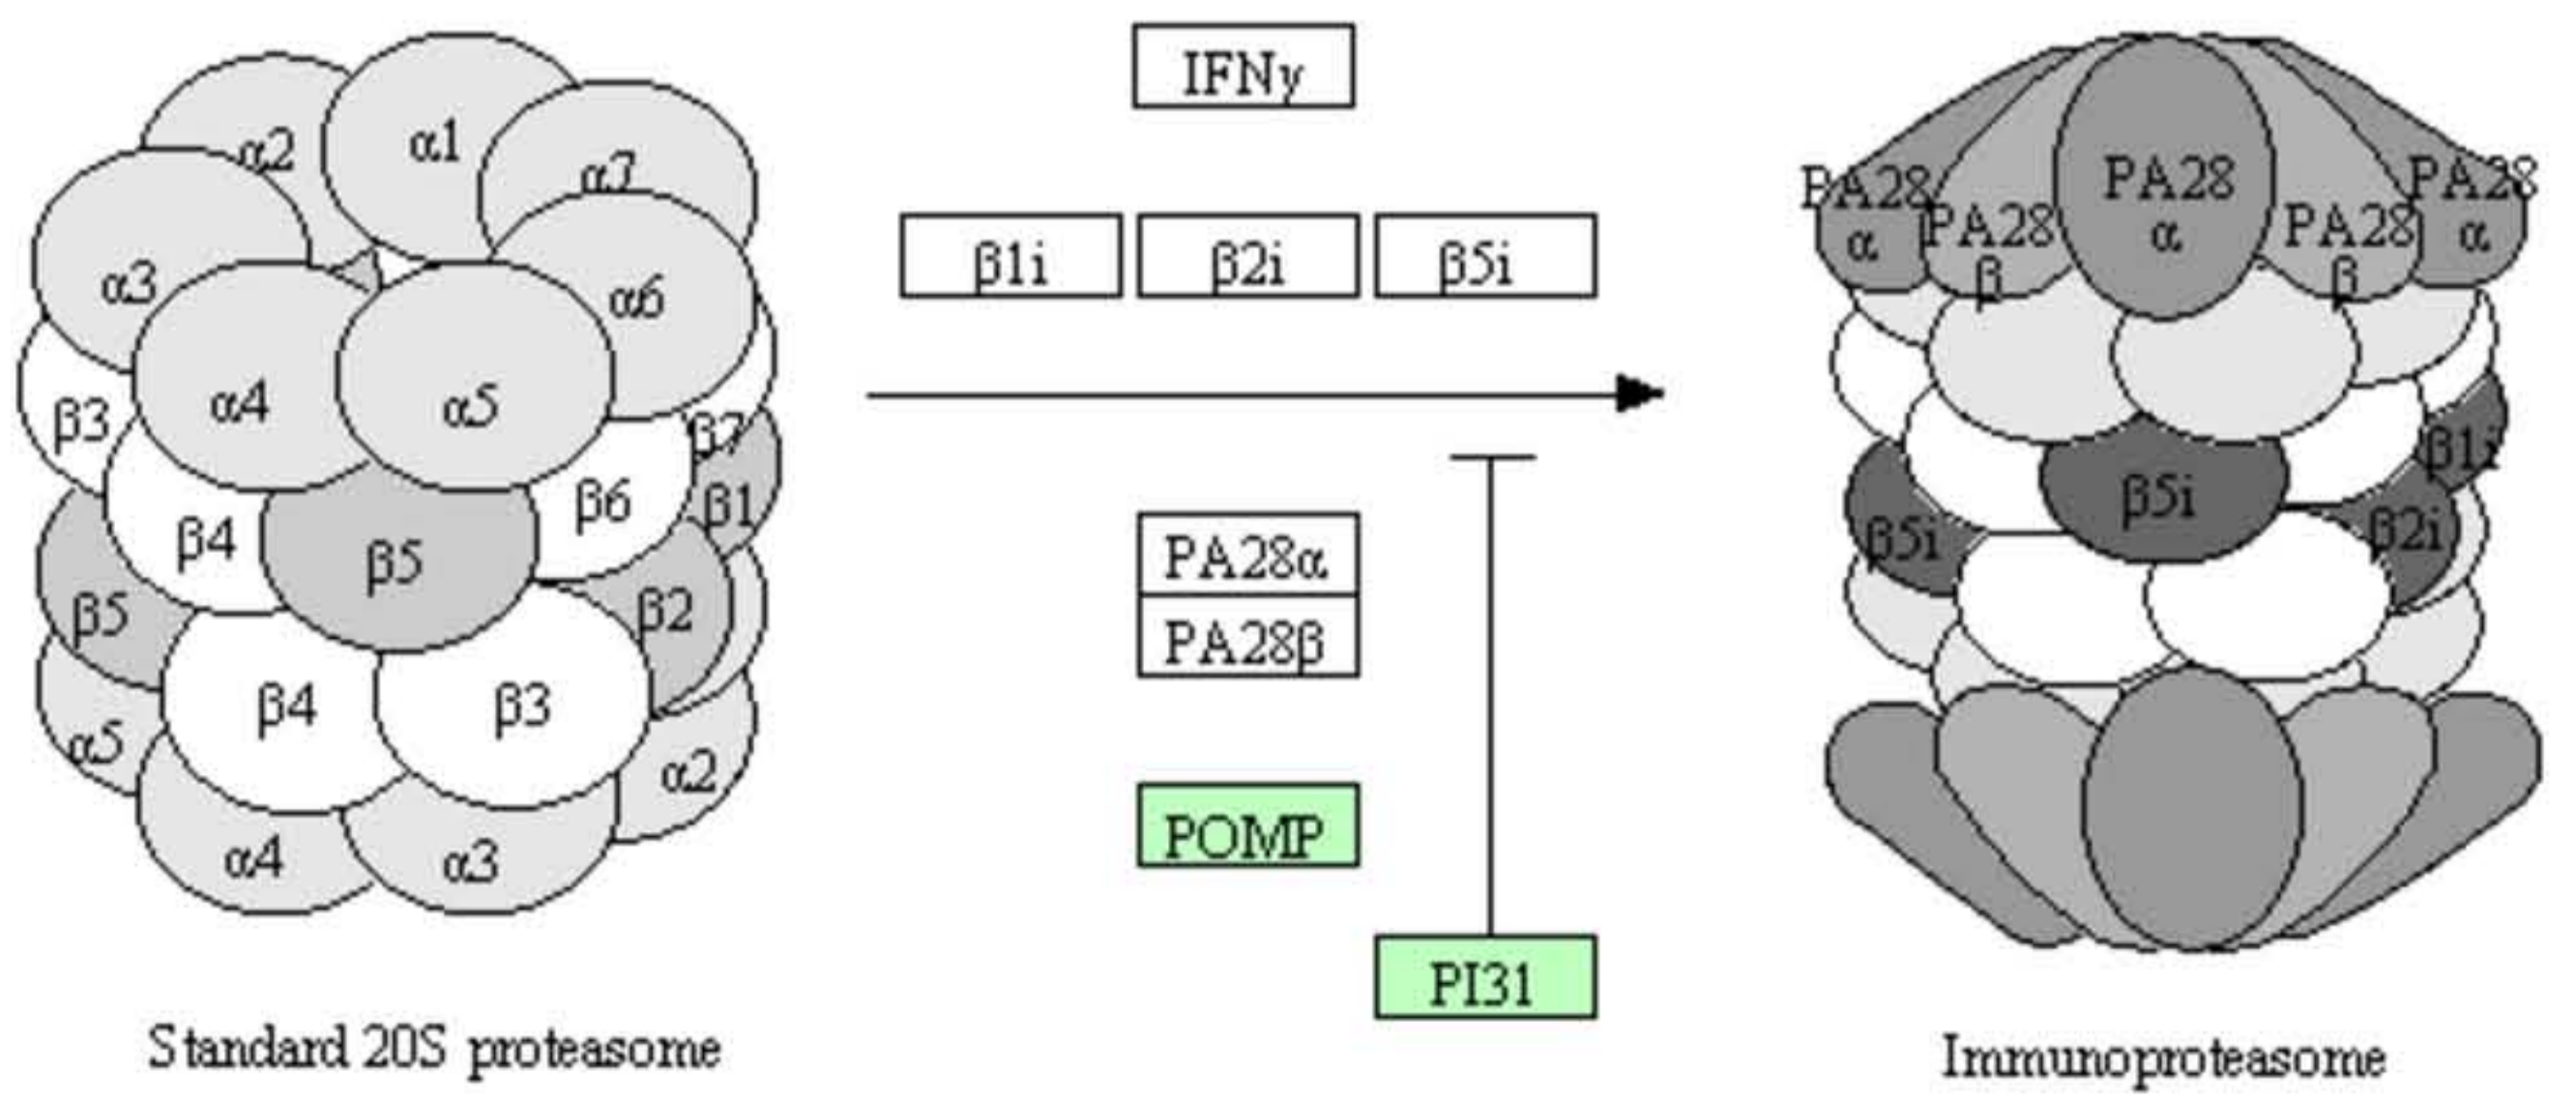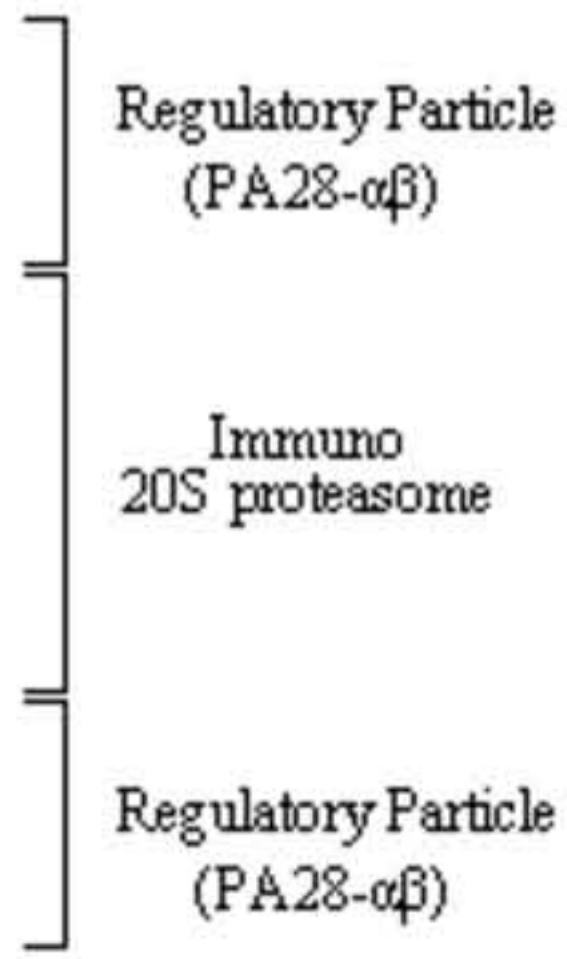



# PROTEIN EXPORT

## Sec dependent pathway

Prokaryotic type

Translocation channel and related proteins

|      |      |      |
|------|------|------|
| SecY | SecE | SecG |
|------|------|------|

|        |      |
|--------|------|
| SecD/F | YajC |
|--------|------|

|      |
|------|
| YidC |
|------|

|      |      |      |
|------|------|------|
| SecA | SecB | SecM |
|------|------|------|

SRP

|     |     |
|-----|-----|
| Ffh | Ffs |
|-----|-----|

SRP receptor

|      |
|------|
| FtsY |
|------|

Eukaryotic type

|                |               |                |
|----------------|---------------|----------------|
| SEC61 $\alpha$ | SEC61 $\beta$ | SEC61 $\gamma$ |
|----------------|---------------|----------------|

|       |       |
|-------|-------|
| SEC62 | SEC63 |
|-------|-------|

|     |
|-----|
| BiP |
|-----|

|      |       |       |       |
|------|-------|-------|-------|
| SRP9 | SRP72 | SRP19 | RN7SL |
|------|-------|-------|-------|

|       |       |       |
|-------|-------|-------|
| SRP14 | SRP68 | SRP54 |
|-------|-------|-------|

|      |
|------|
| SRPR |
|------|

|       |
|-------|
| SRPRB |
|-------|

## Tat (twin-arginine translocation) system

Prokaryotic type

|      |      |      |
|------|------|------|
| TatA | TatB | TatC |
|------|------|------|

|      |
|------|
| TatE |
|------|

## Signal peptidase

Prokaryotic type

|         |          |
|---------|----------|
| SPase I | SPase II |
|---------|----------|

Eukaryotic type

|       |       |       |       |
|-------|-------|-------|-------|
| SPCS1 | SPCS2 | SPCS3 | SEC11 |
|-------|-------|-------|-------|

|      |      |
|------|------|
| IMP1 | IMP2 |
|------|------|

## Sec dependent pathway (post-translational translocation)

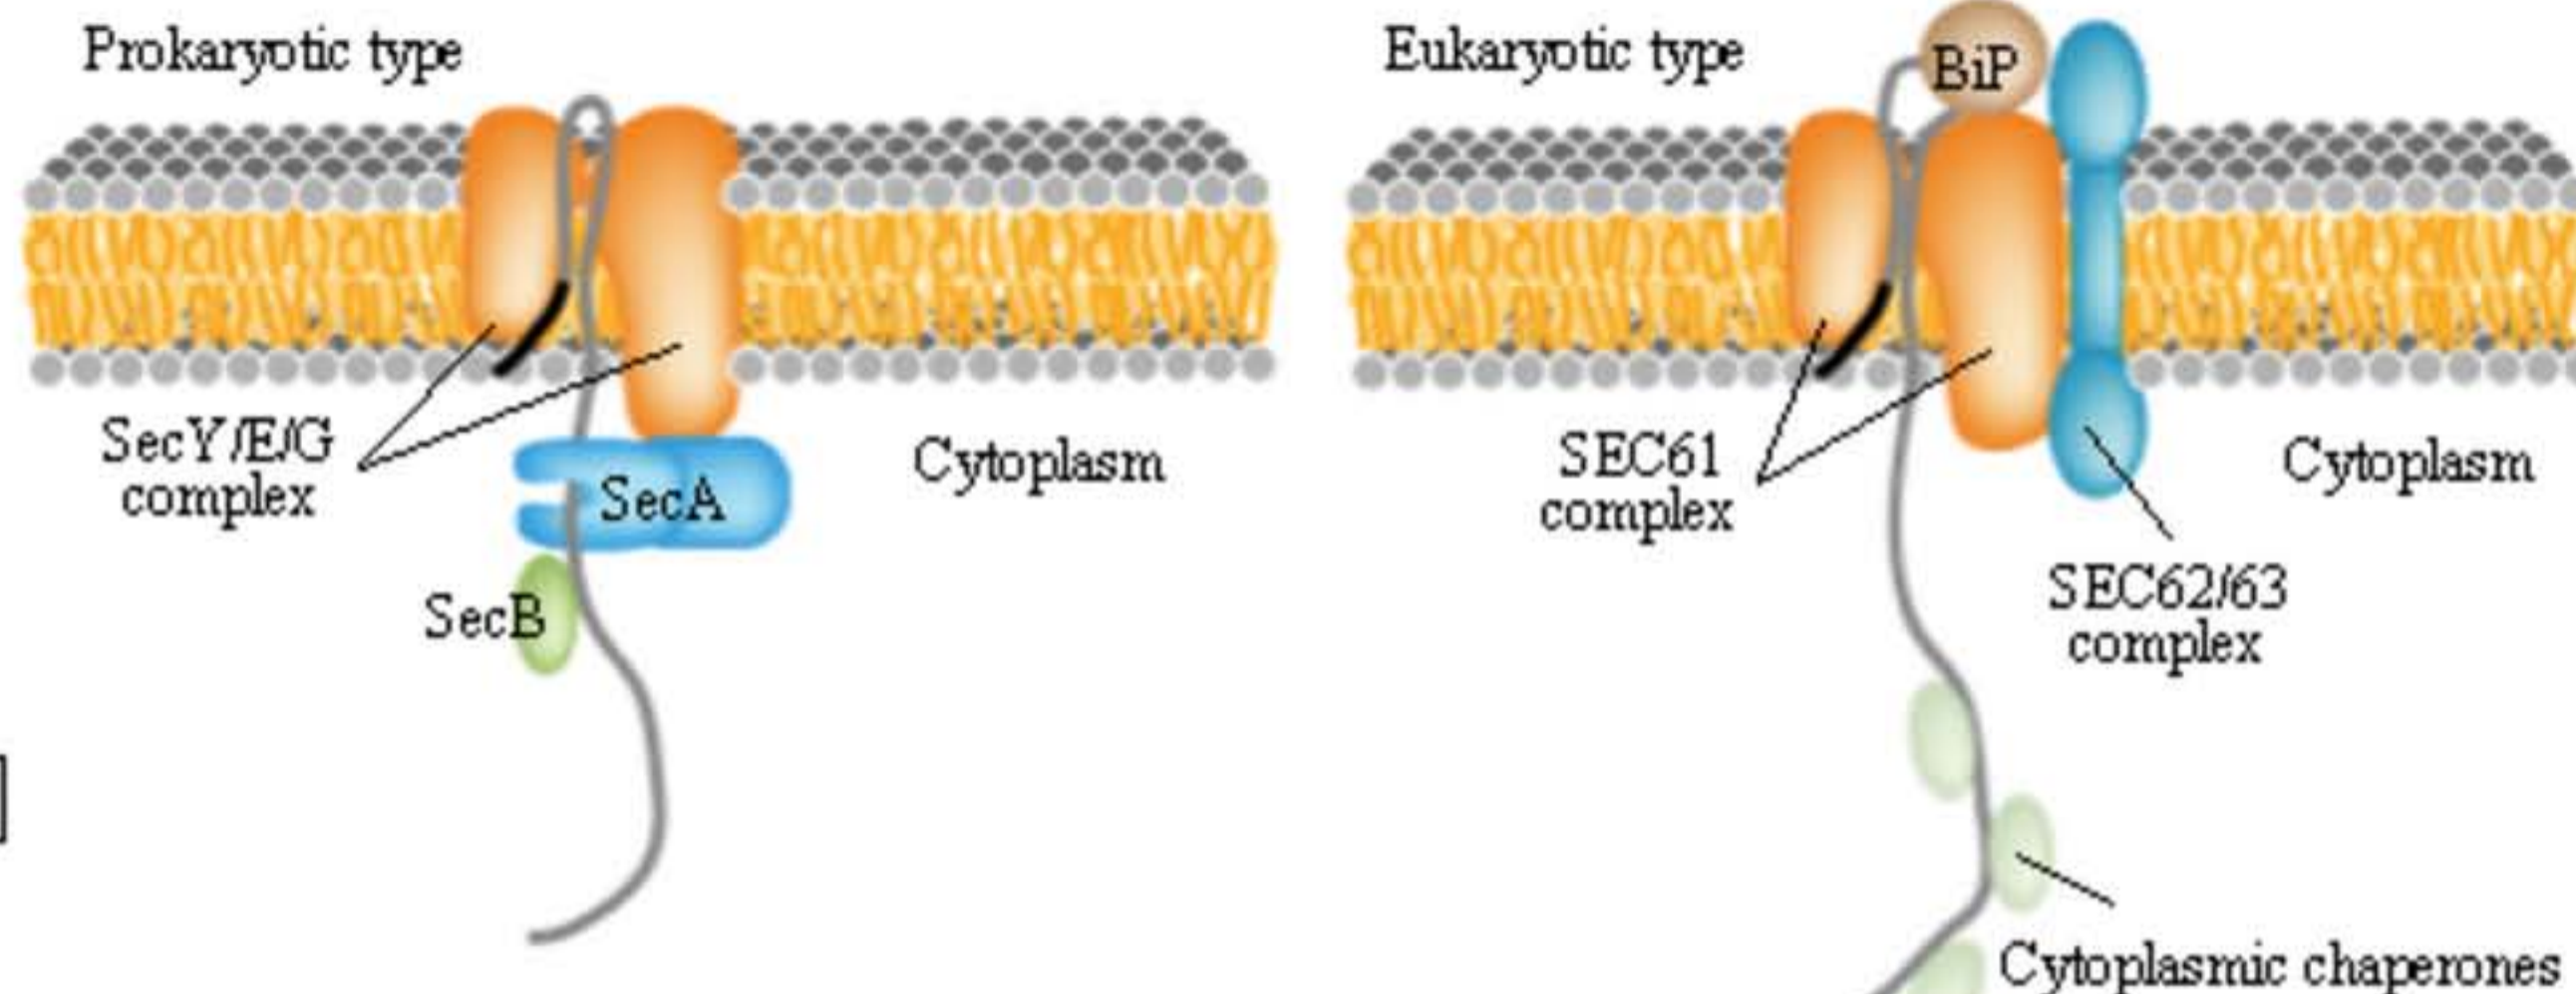

## Sec dependent pathway (co-translational translocation)

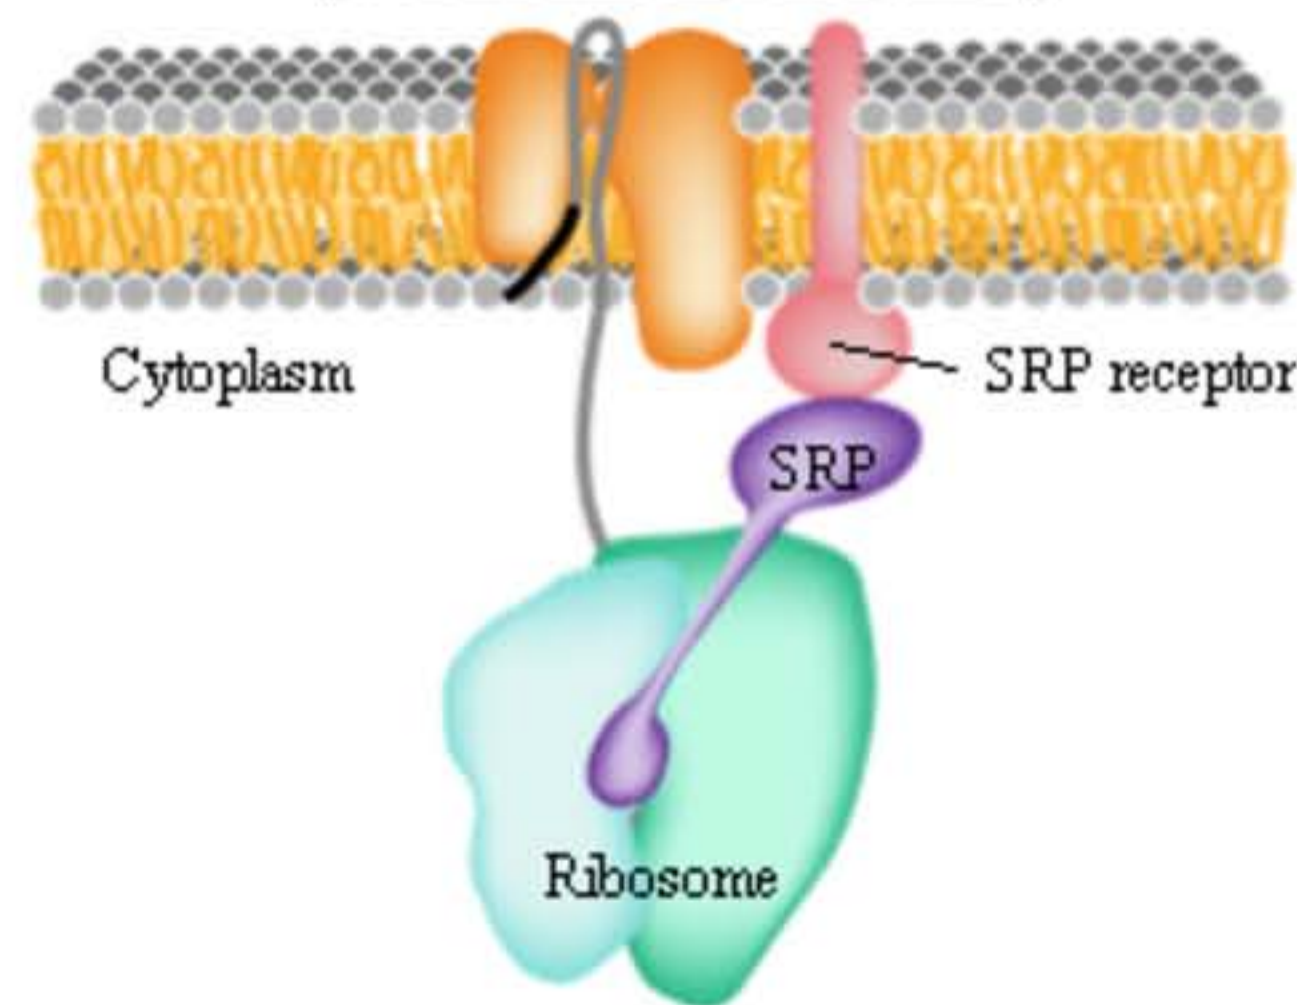



**PROTEIN PROCESSING IN ENDOPLASMIC RETICULUM**

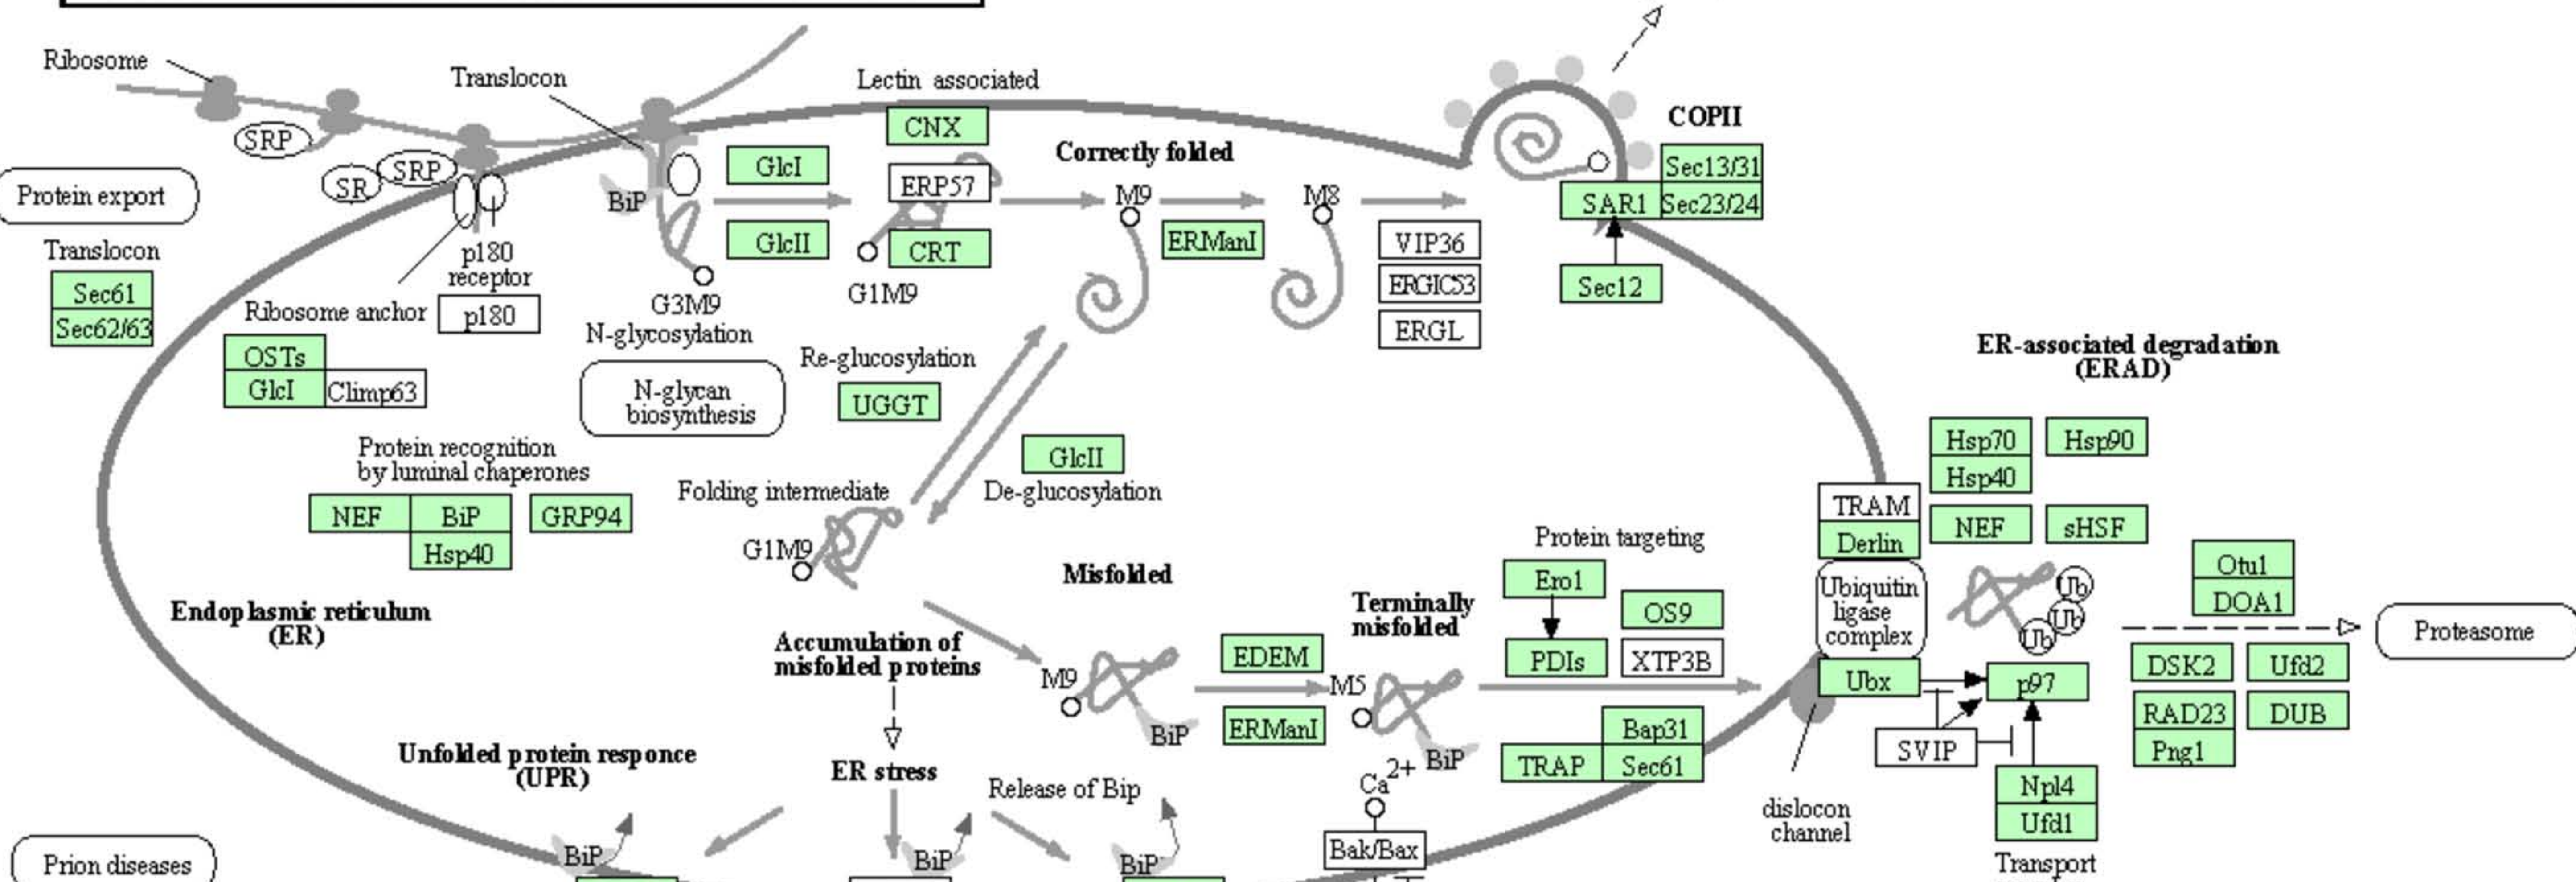

- Prion diseases
- Alzheimer's disease
- Parkinson's disease
- Type II diabetes mellitus

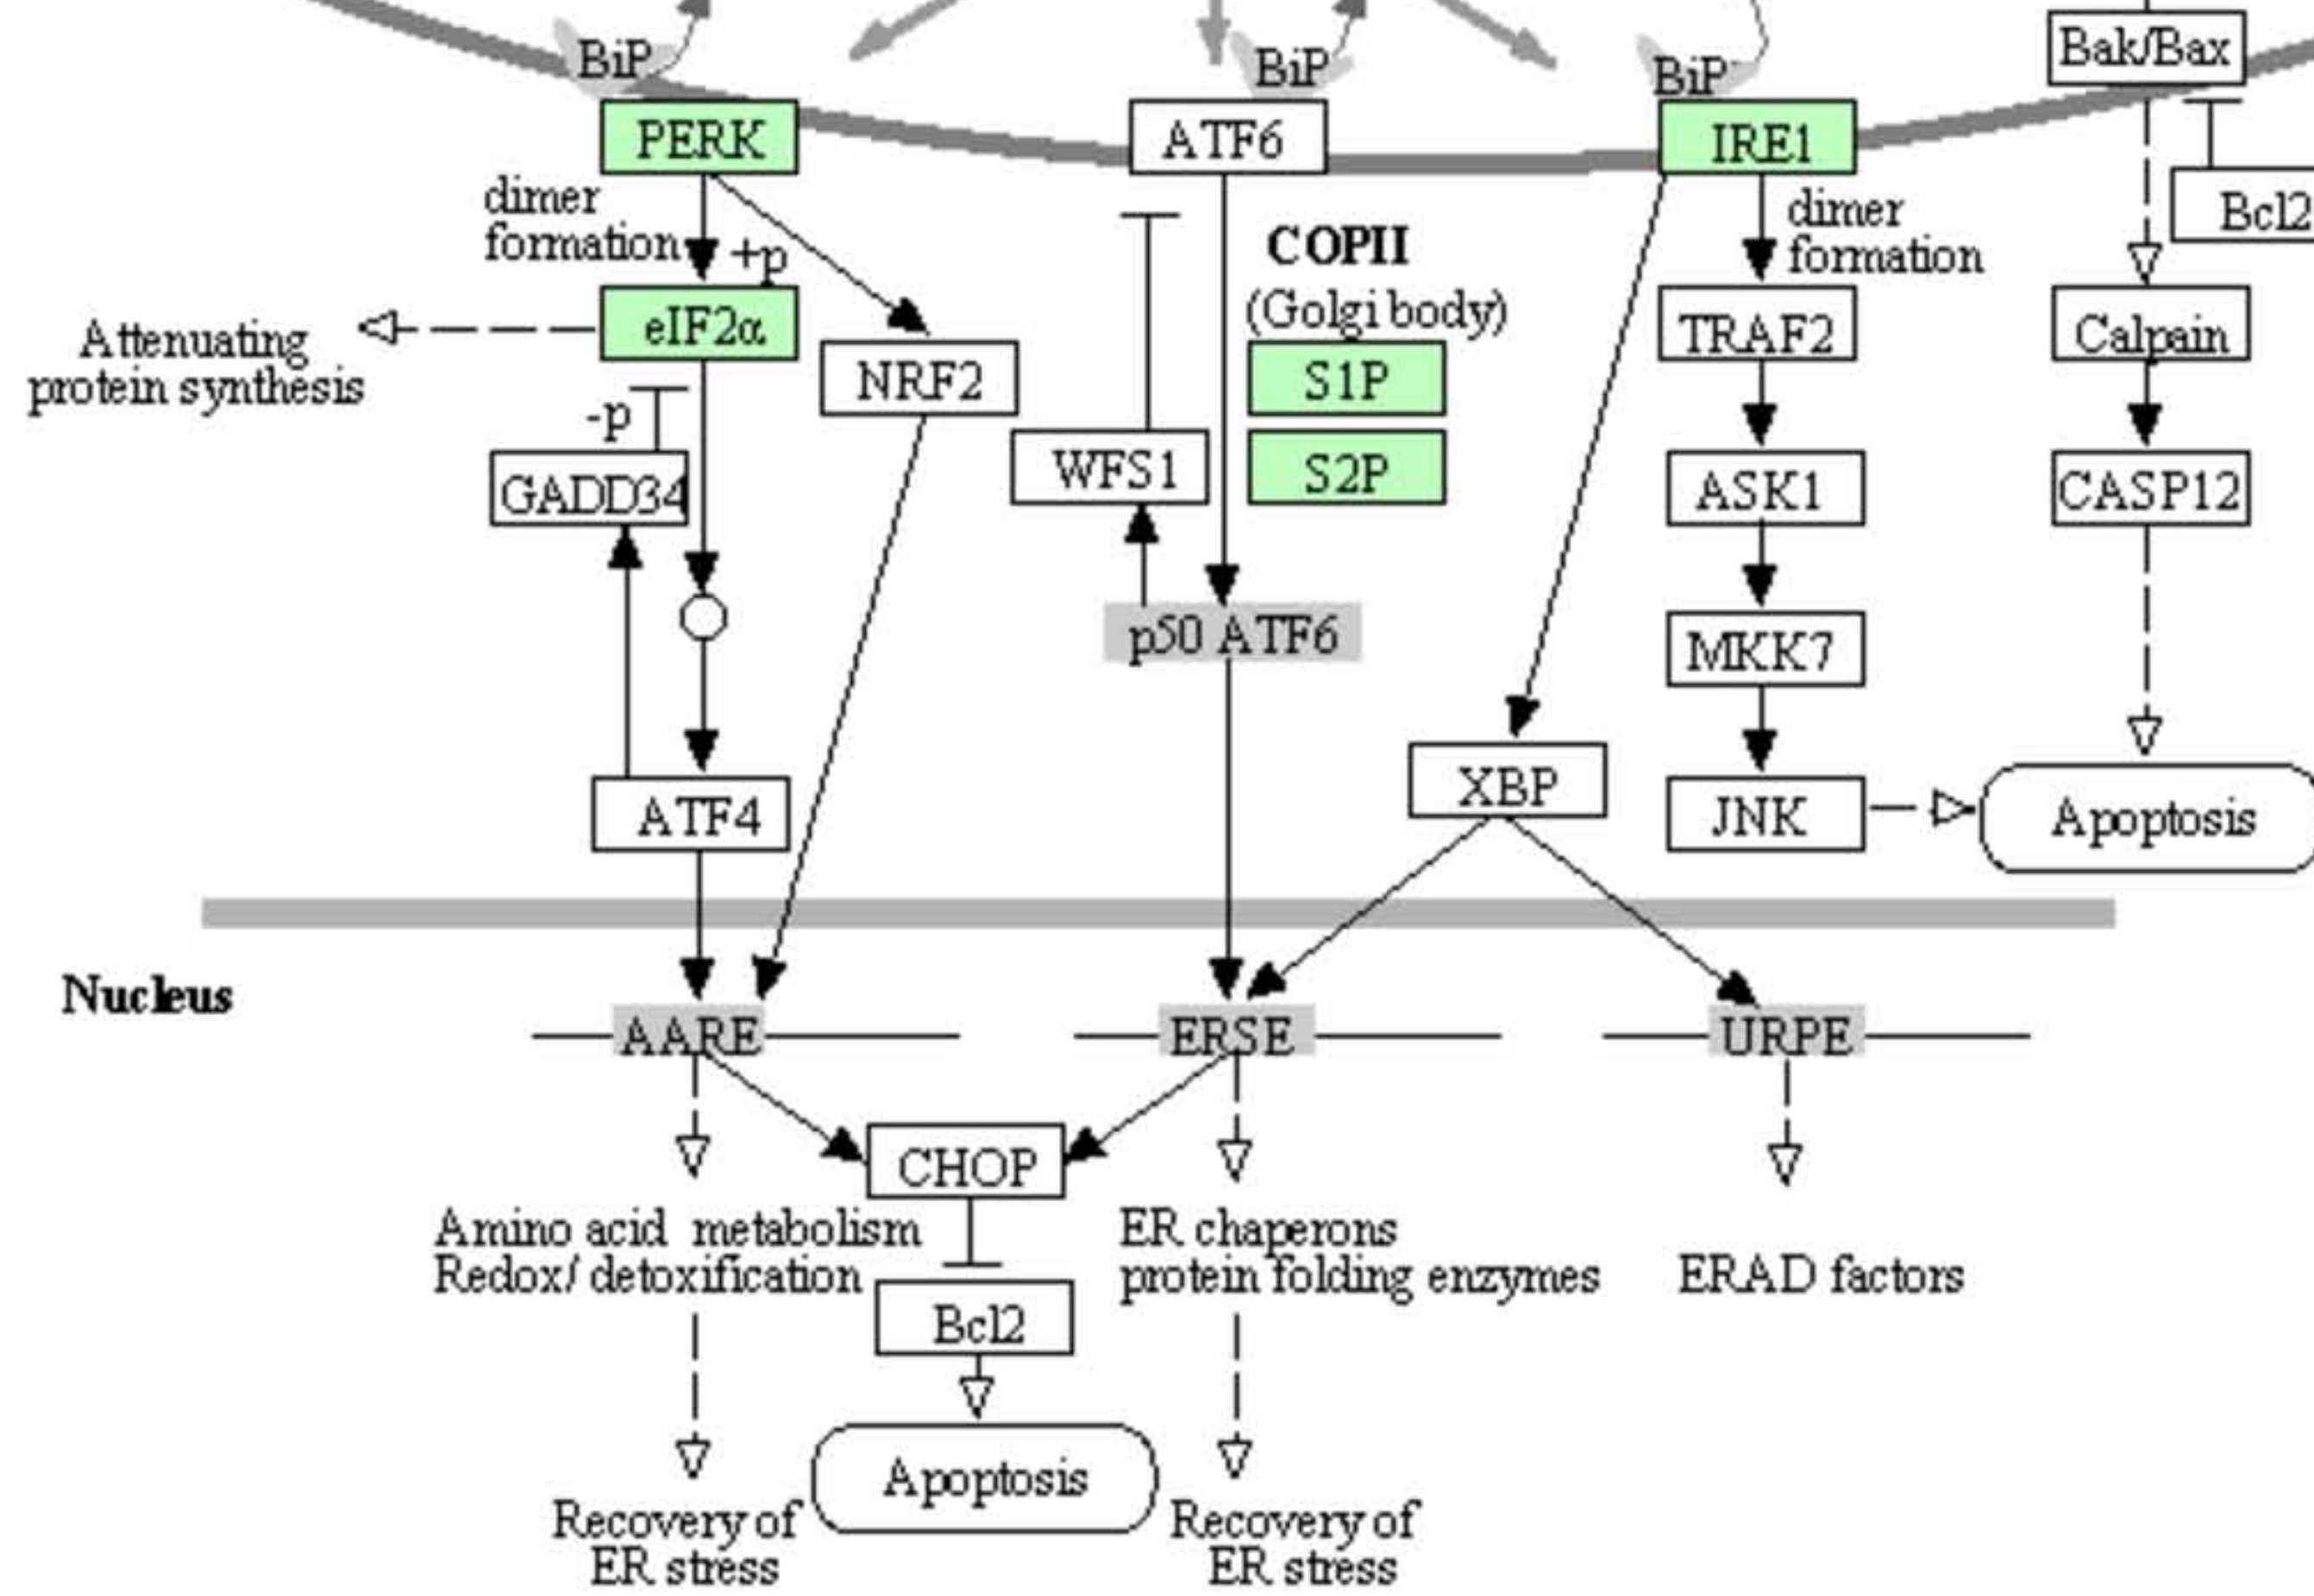

**Ubiquitin ligase complex**

| ER membrane                       |        | Cytoplasm |        |
|-----------------------------------|--------|-----------|--------|
| <b>ERAD- C</b>                    |        |           |        |
| Doa10                             | Ubc6/7 | Cue1      | gp78   |
|                                   |        |           | RMA1   |
|                                   |        |           | Derlin |
| <b>ERAD- L/M</b>                  |        |           |        |
| Hrd3                              | Ubx2   | Sel1L     | VIMP   |
| Hrd1                              | Usa1   | HERP      | HRD1   |
| Ubc7                              | Cue1   |           | Ubc6/7 |
| <b>(Saccharomyces cerevisiae)</b> |        |           |        |
| <b>(Mammals)</b>                  |        |           |        |
|                                   |        |           | UbcH5  |
|                                   |        |           | Hsp40  |
|                                   |        |           | Hsp70  |
|                                   |        |           | CHIP   |
|                                   |        |           | Parkin |
|                                   |        |           | UbcH5  |
|                                   |        |           | RBX1   |
|                                   |        |           | Cull1  |
|                                   |        |           | FBP    |
|                                   |        |           | Skp1   |



PURINE METABOLISM

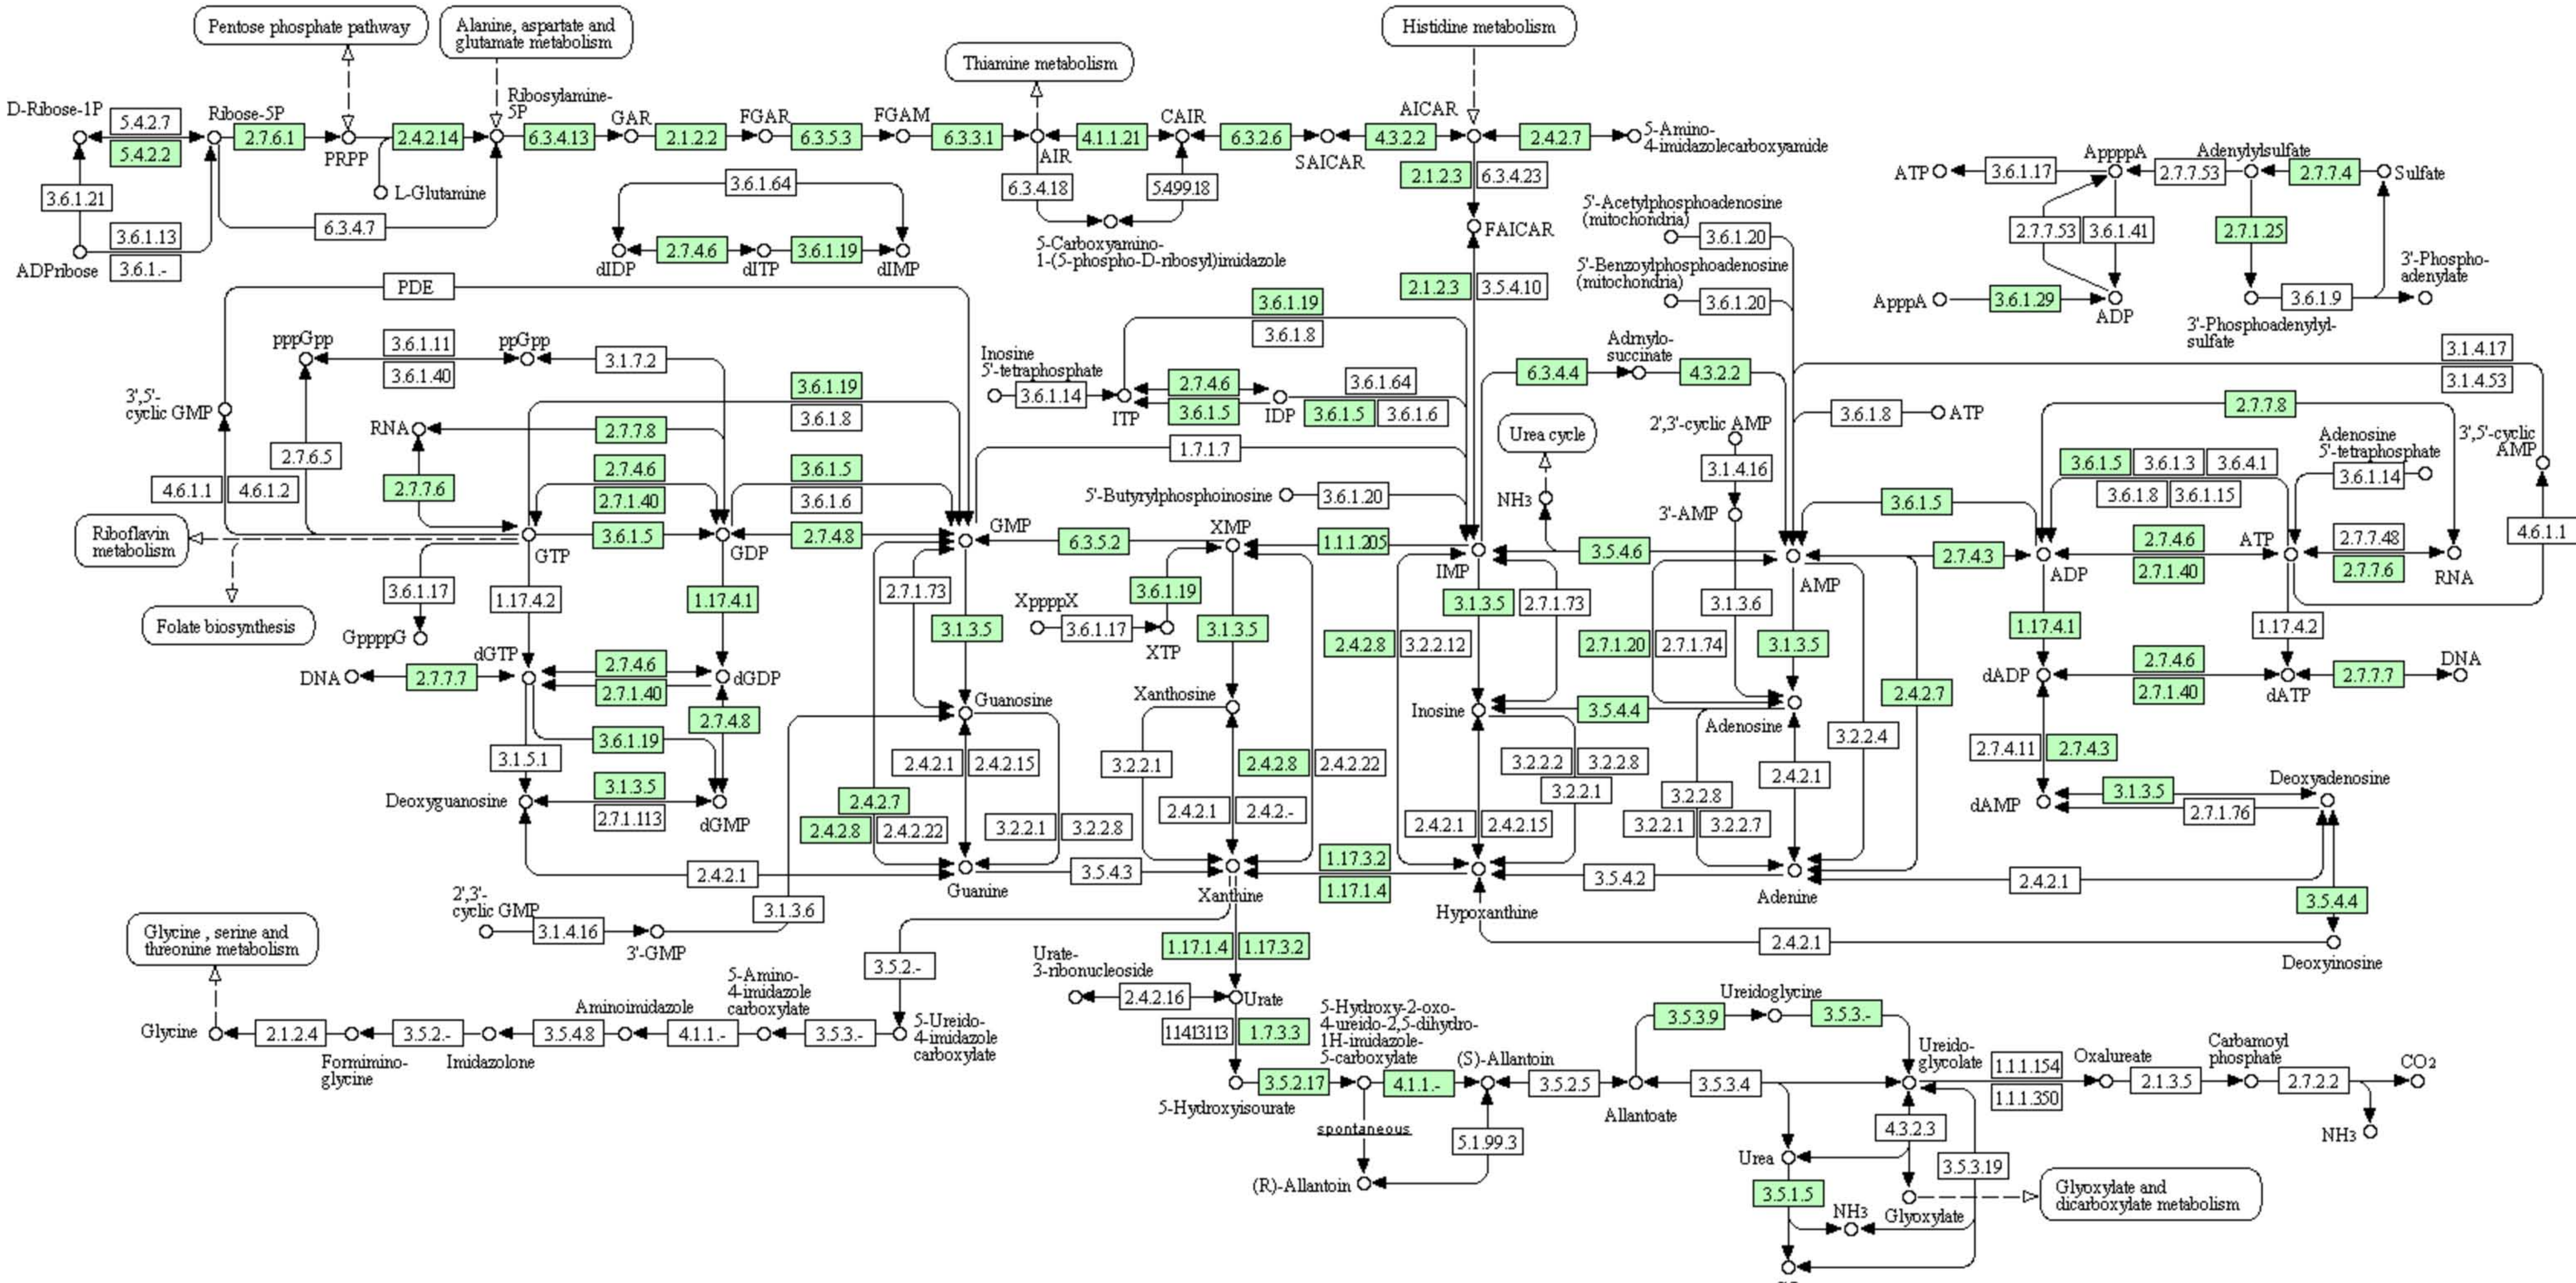











REGULATION OF ACTIN CYTOSKELETON

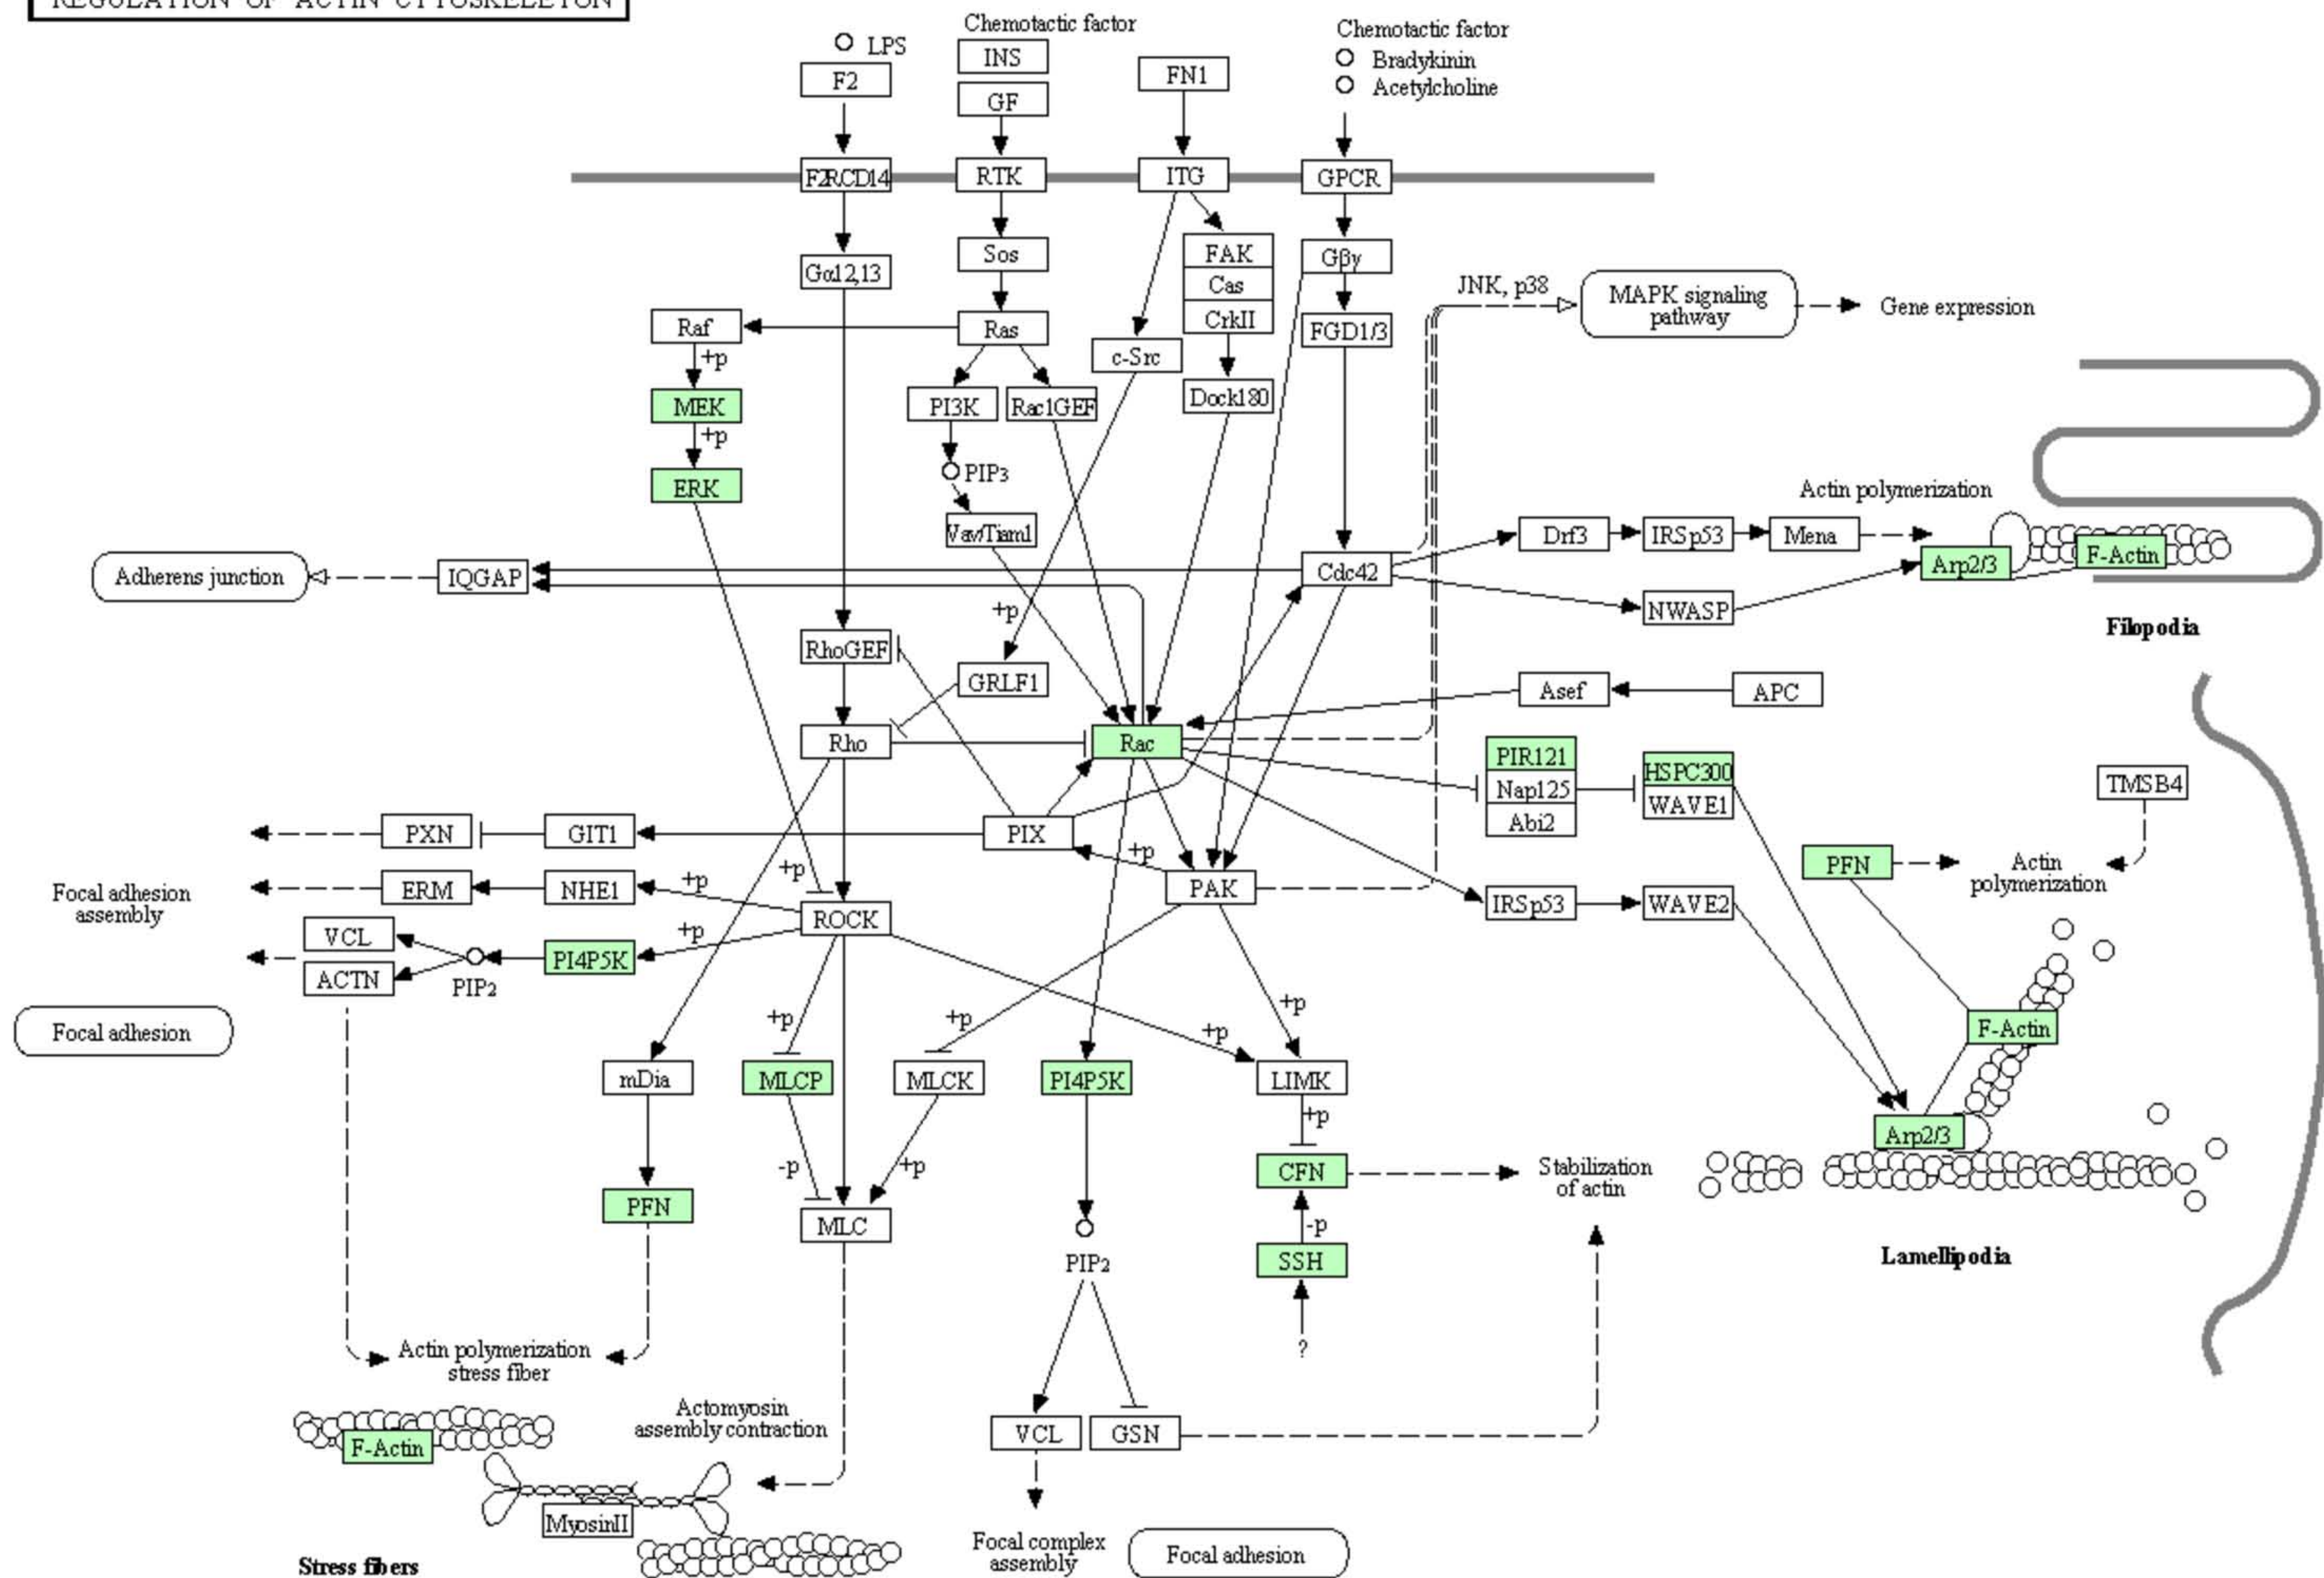



# REGULATION OF AUTOPHAGY

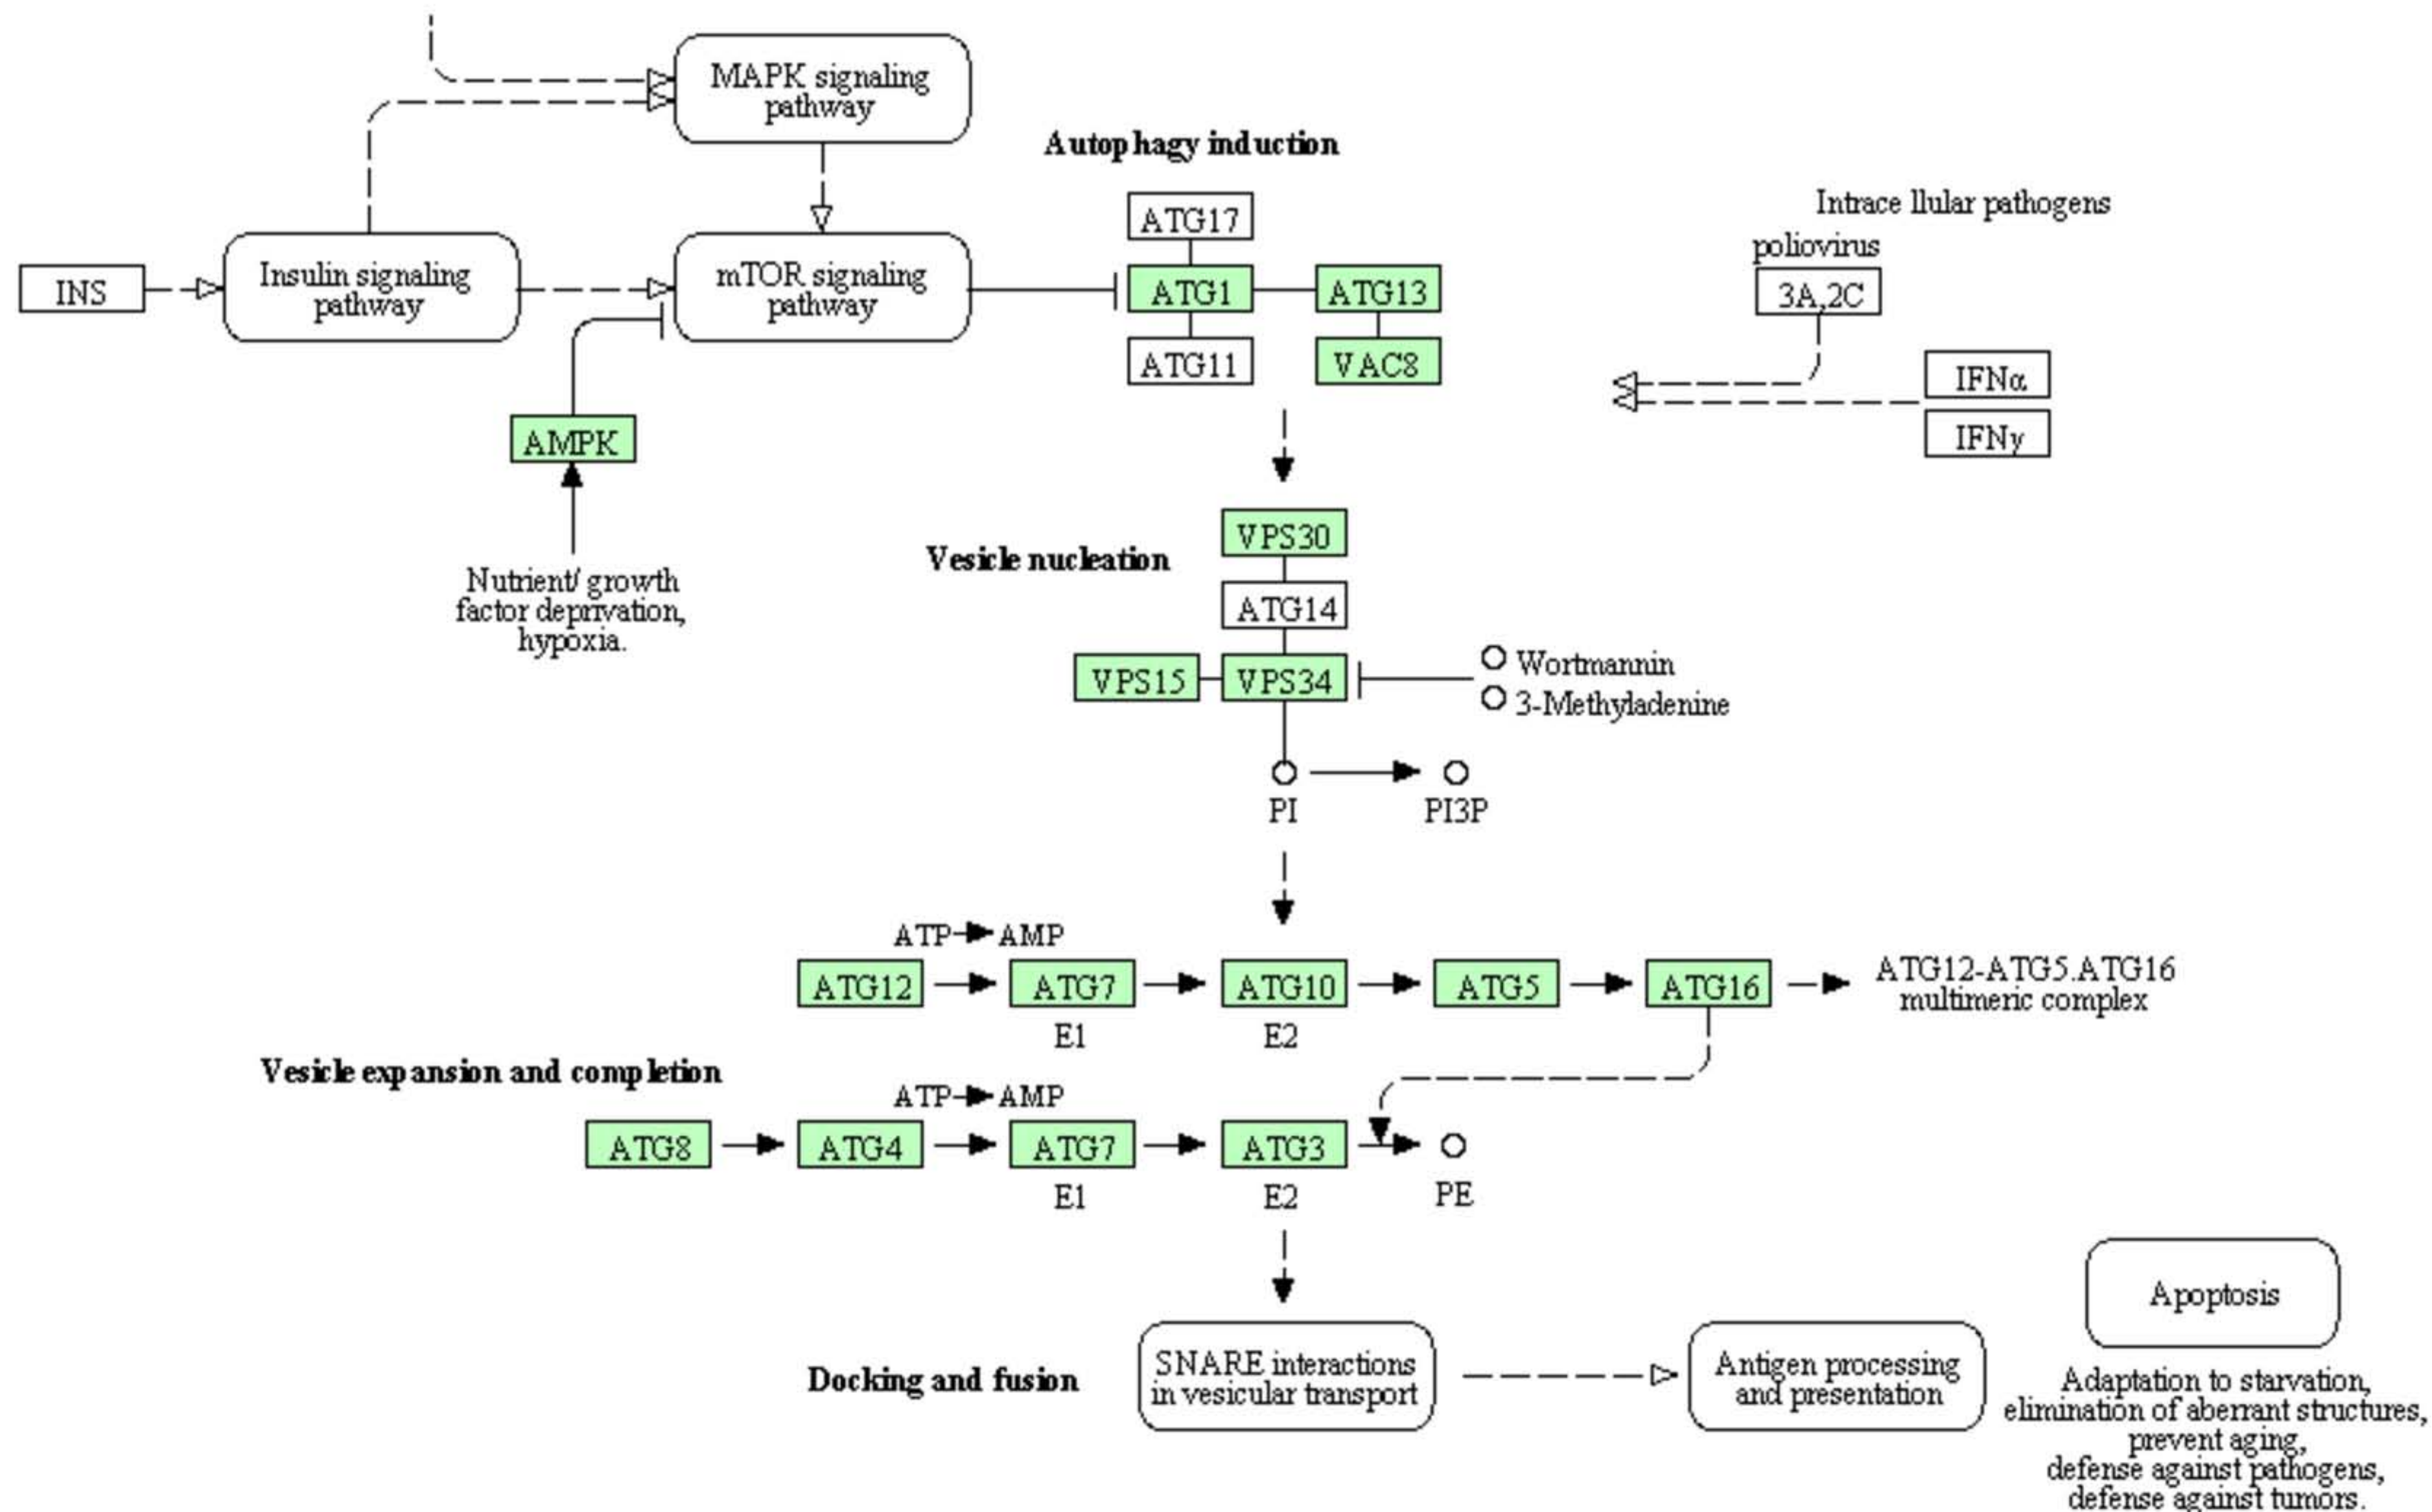



# RIBOFLAVIN METABOLISM

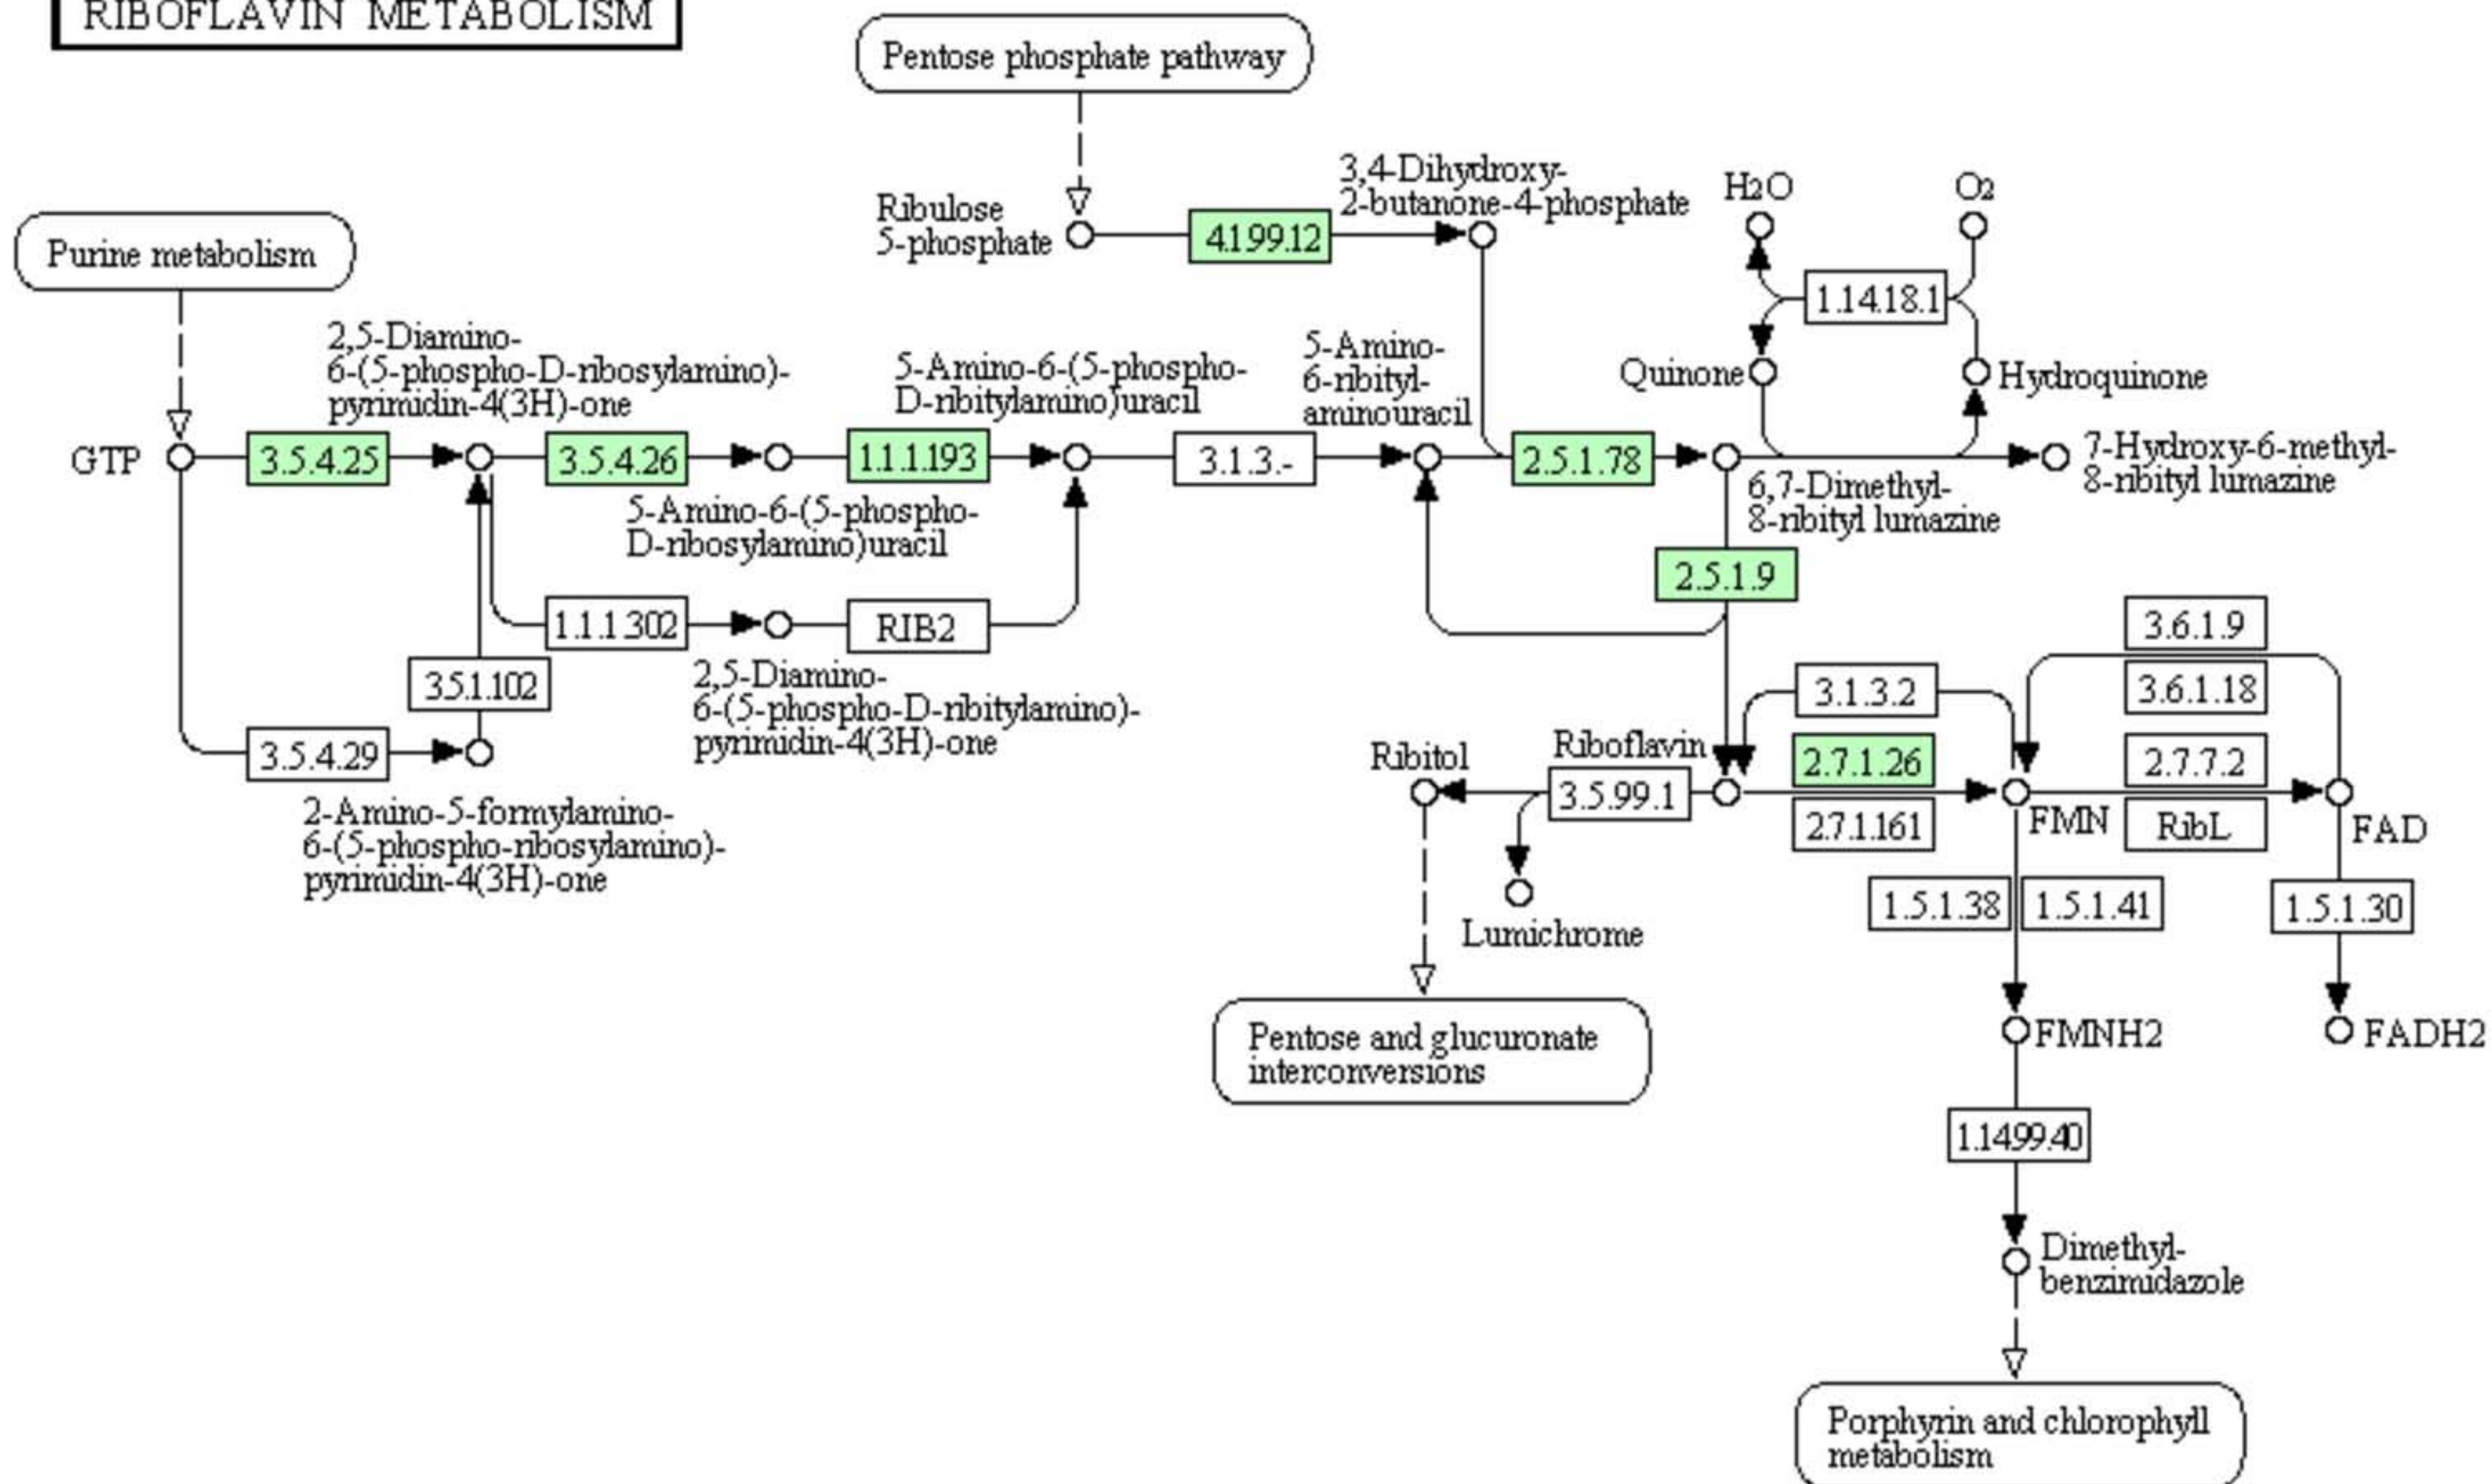



# RIBOSOME BIOGENESIS IN EUKARYOTES

## Ribosomal RNAs

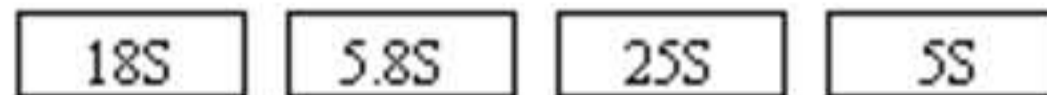

## 90S pre-ribosome components

### UTP-C complex

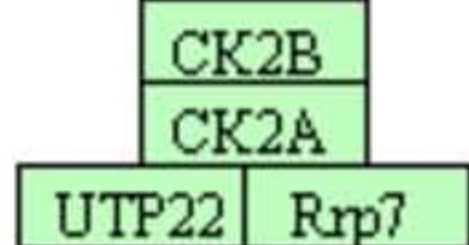

### t-UTP complex

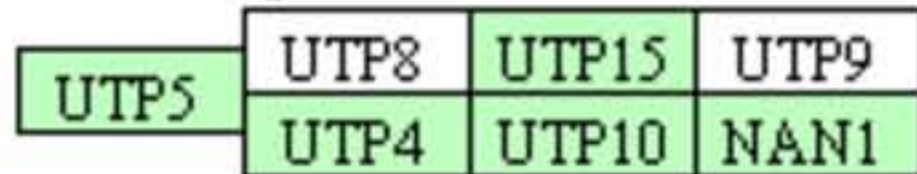

### UTP-B complex

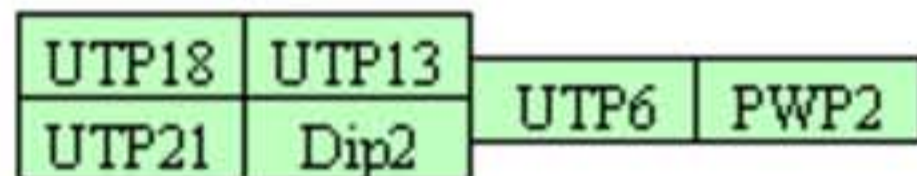

### MPP10 complex

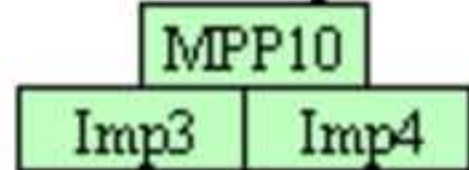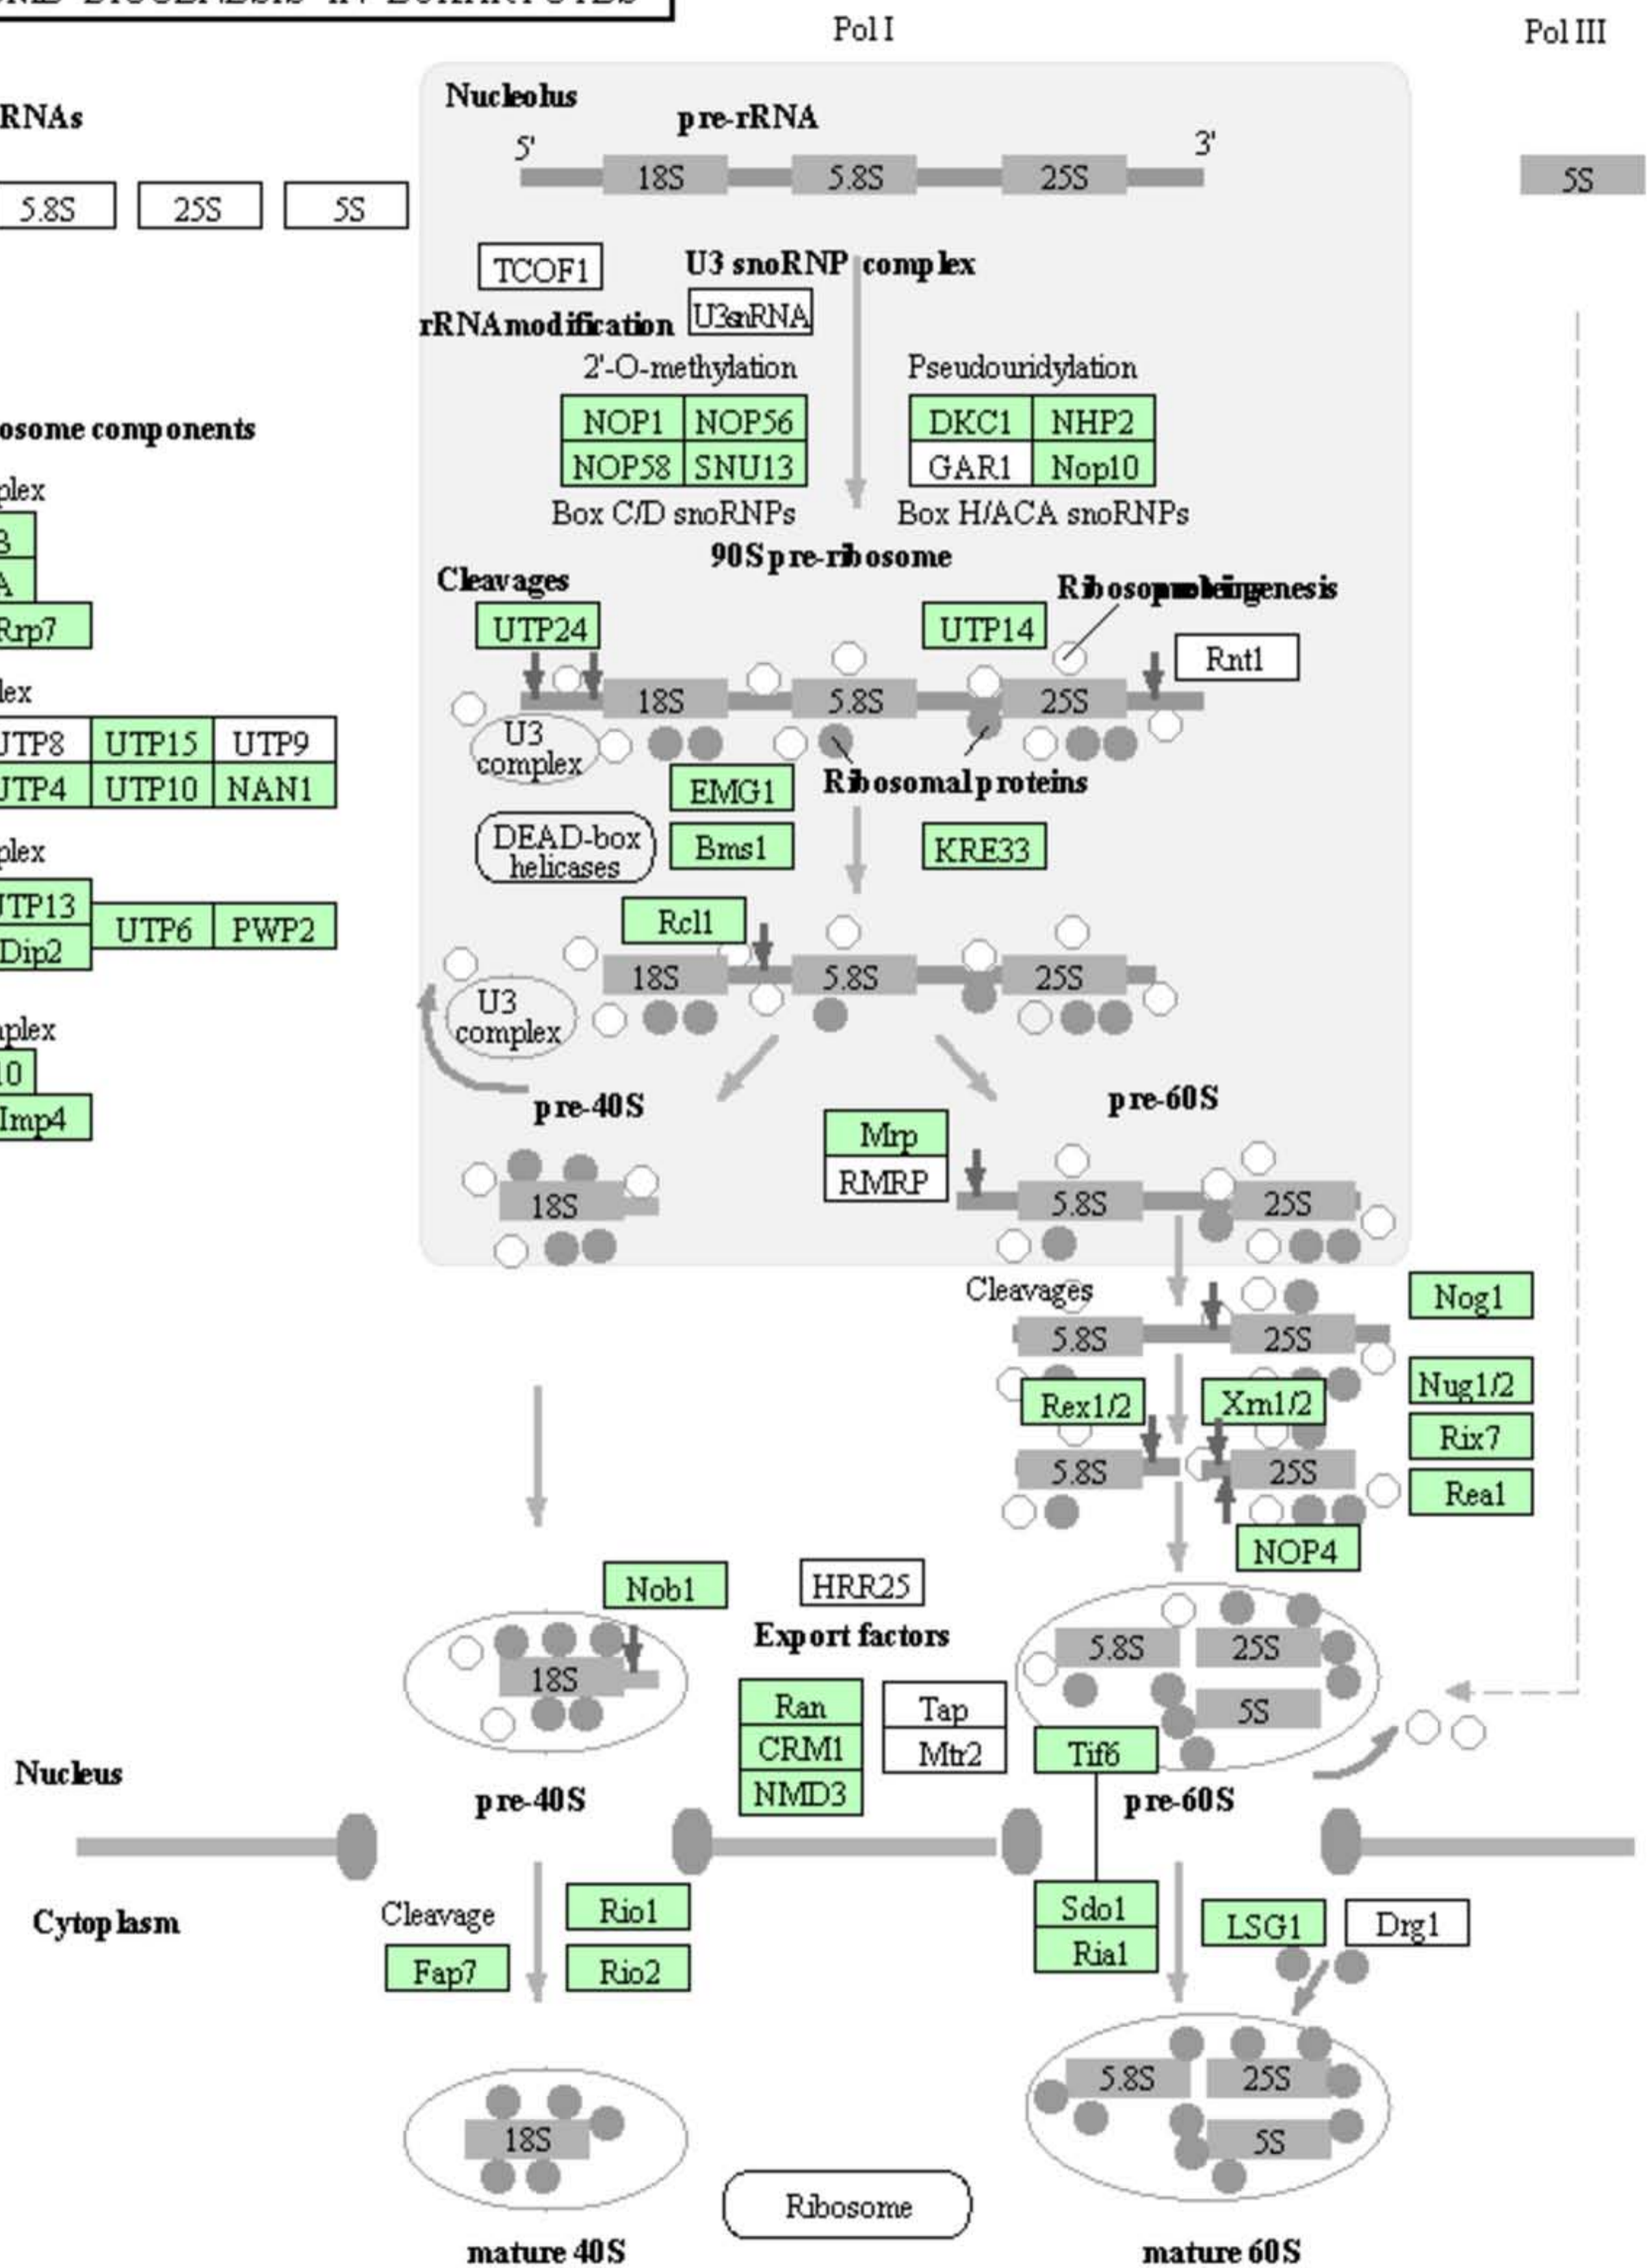







**RIG-I-LIKE RECEPTOR SIGNALING PATHWAY**

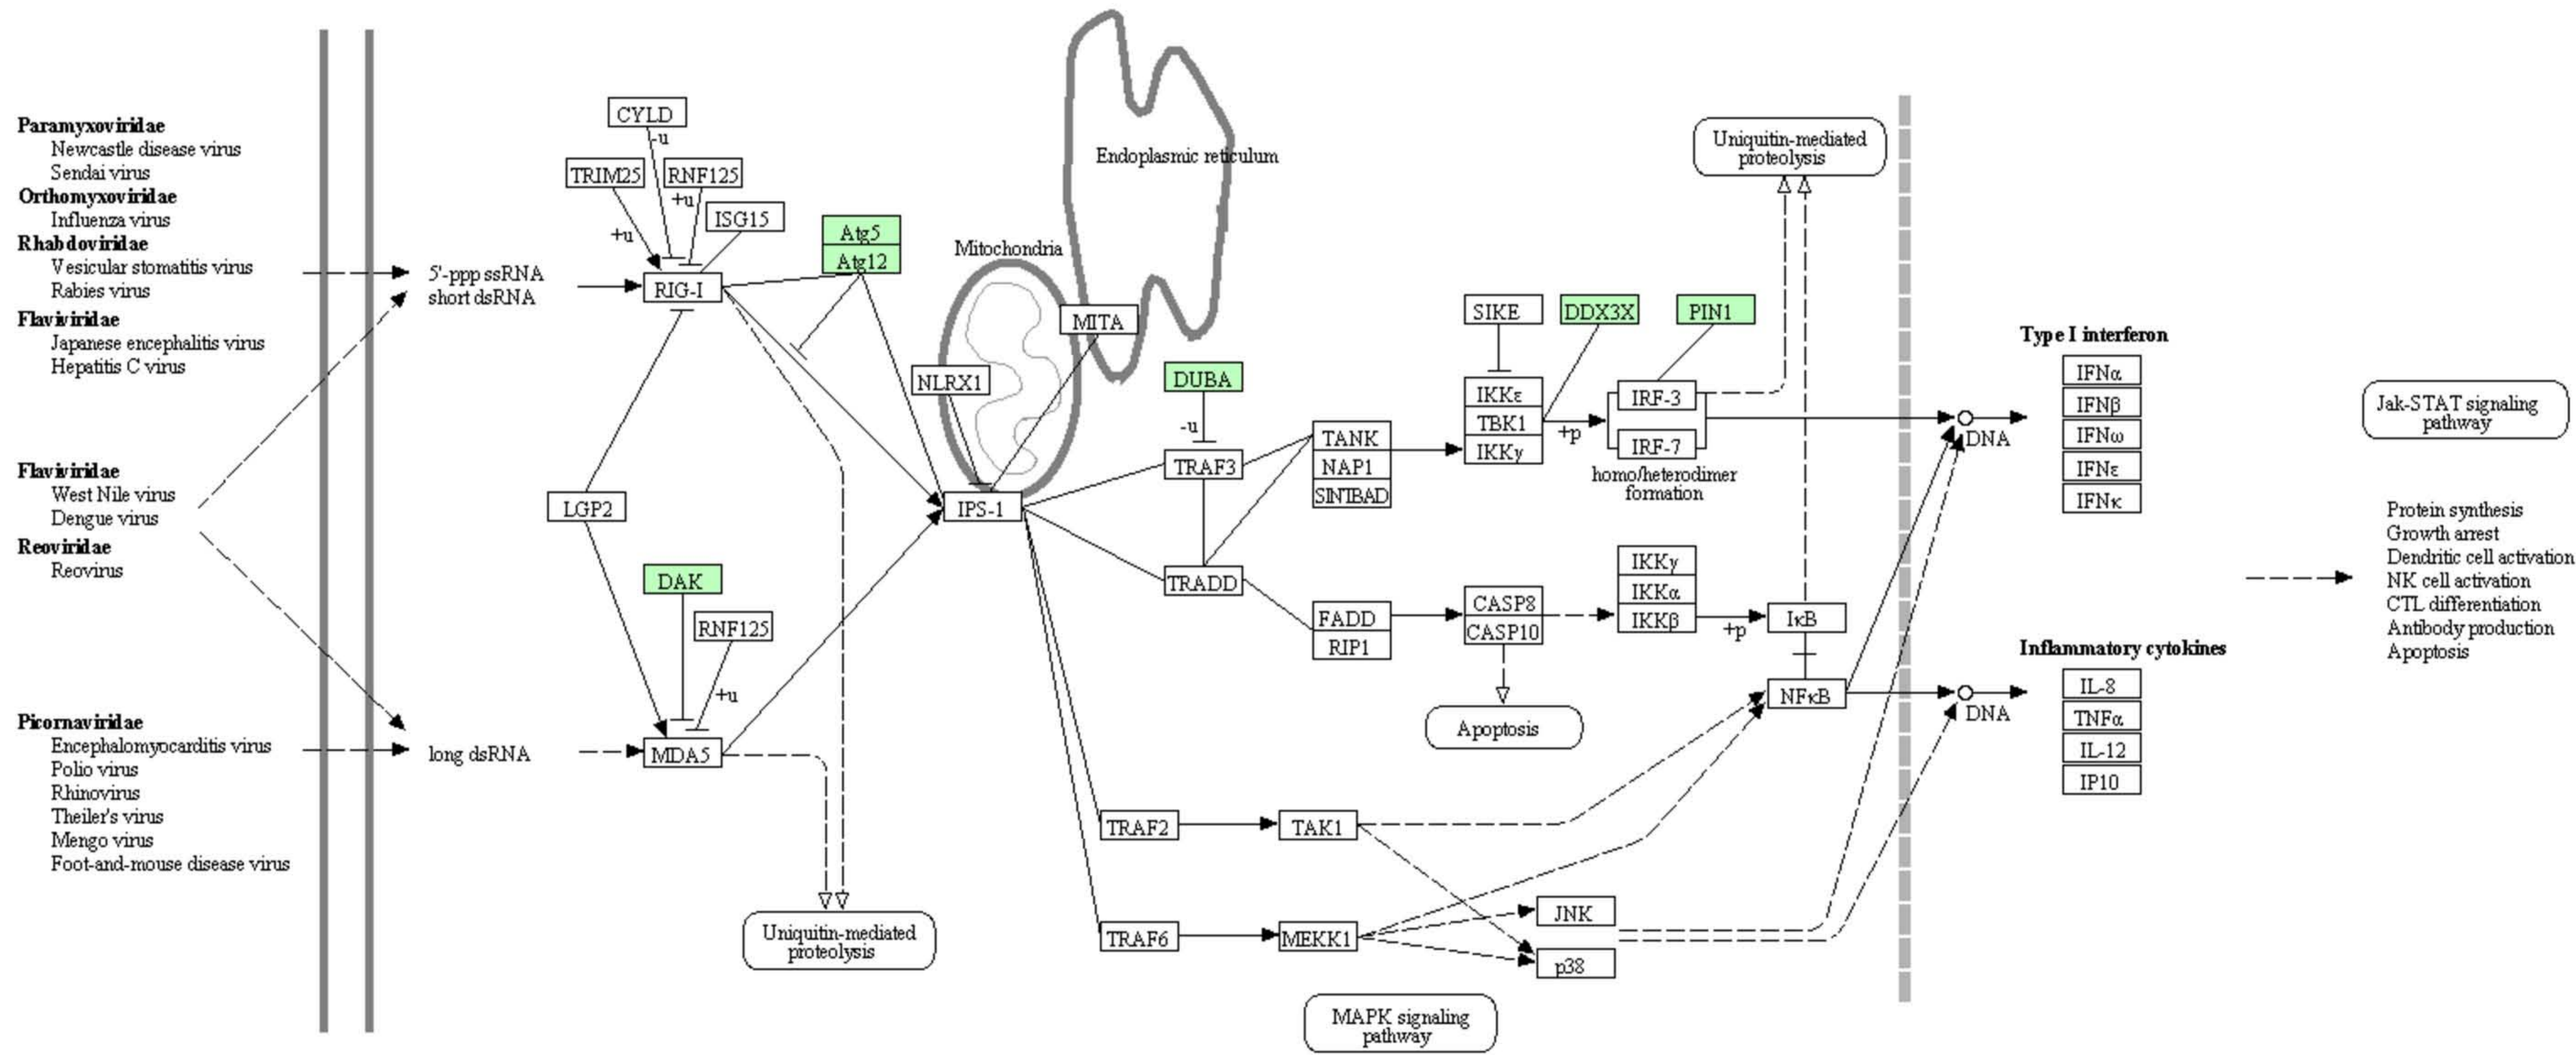



# Eukaryotic RNA degradation

## RNA DEGRADATION

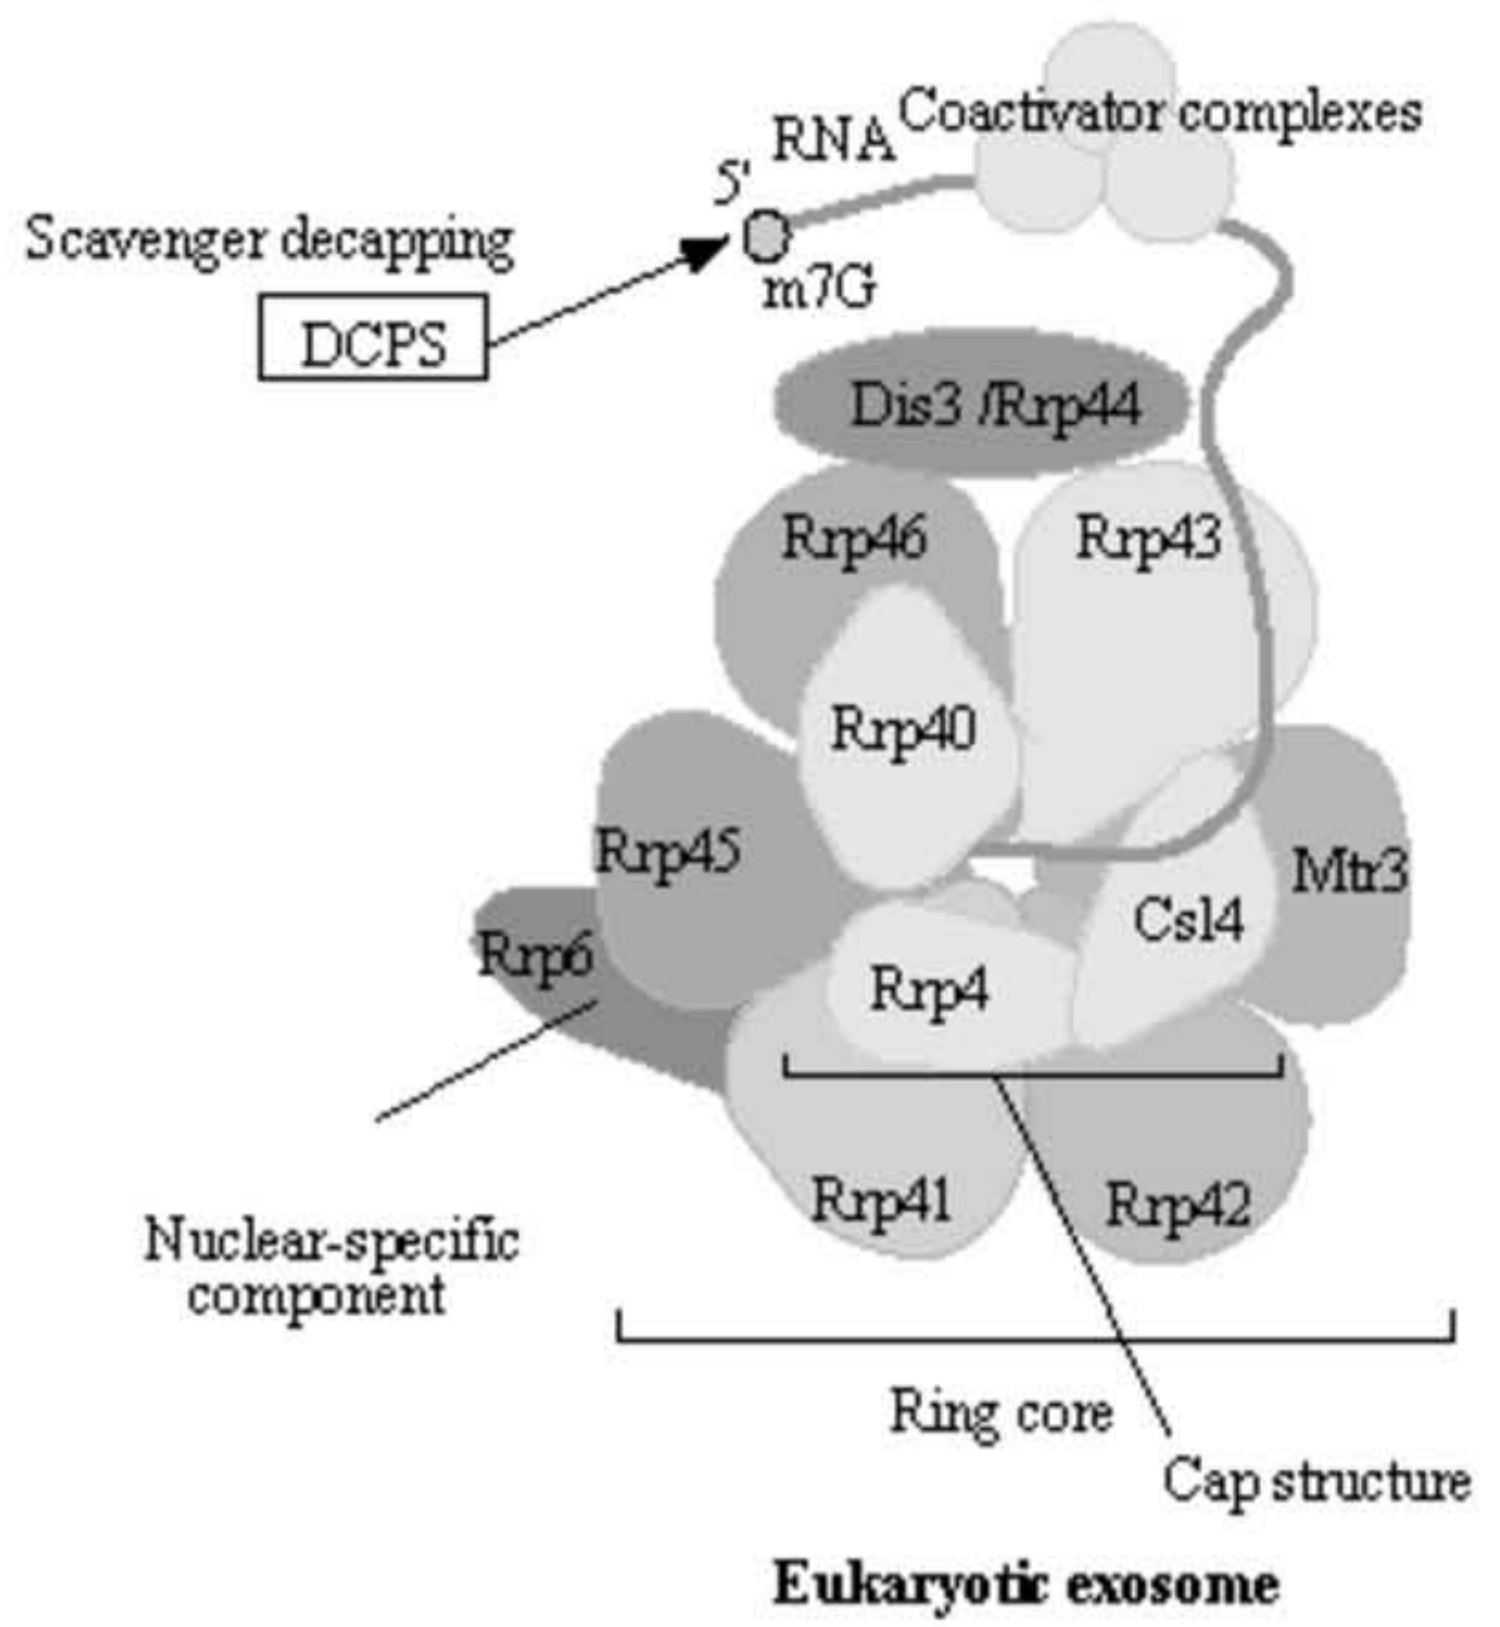

### 3' → 5' decay

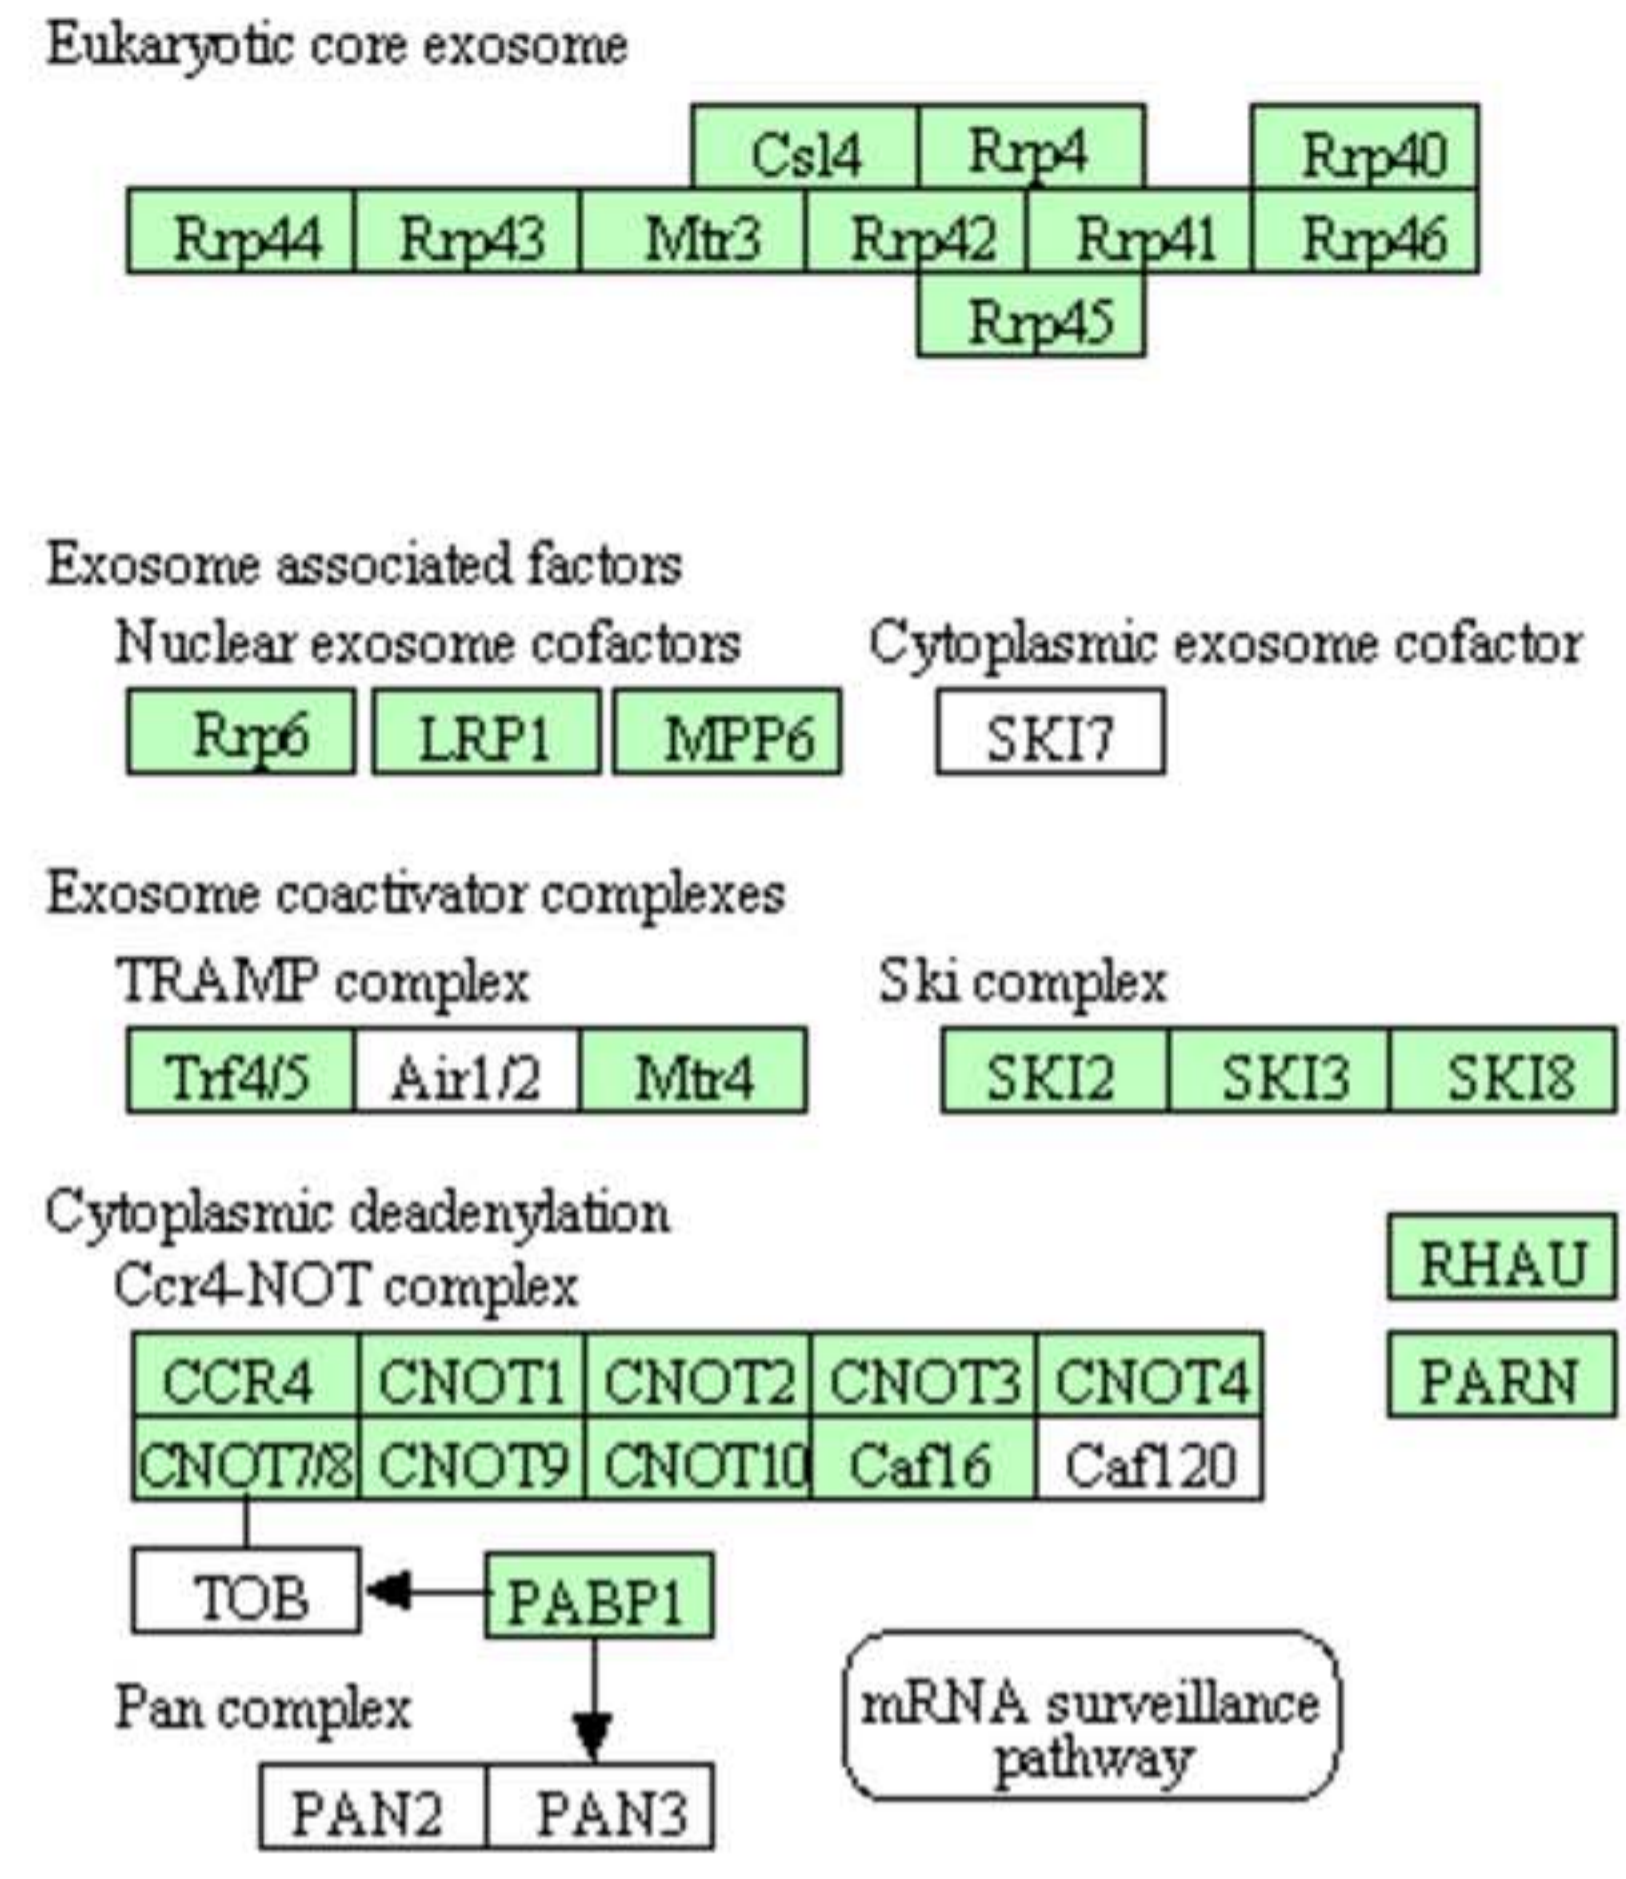

### 5' → 3' decay

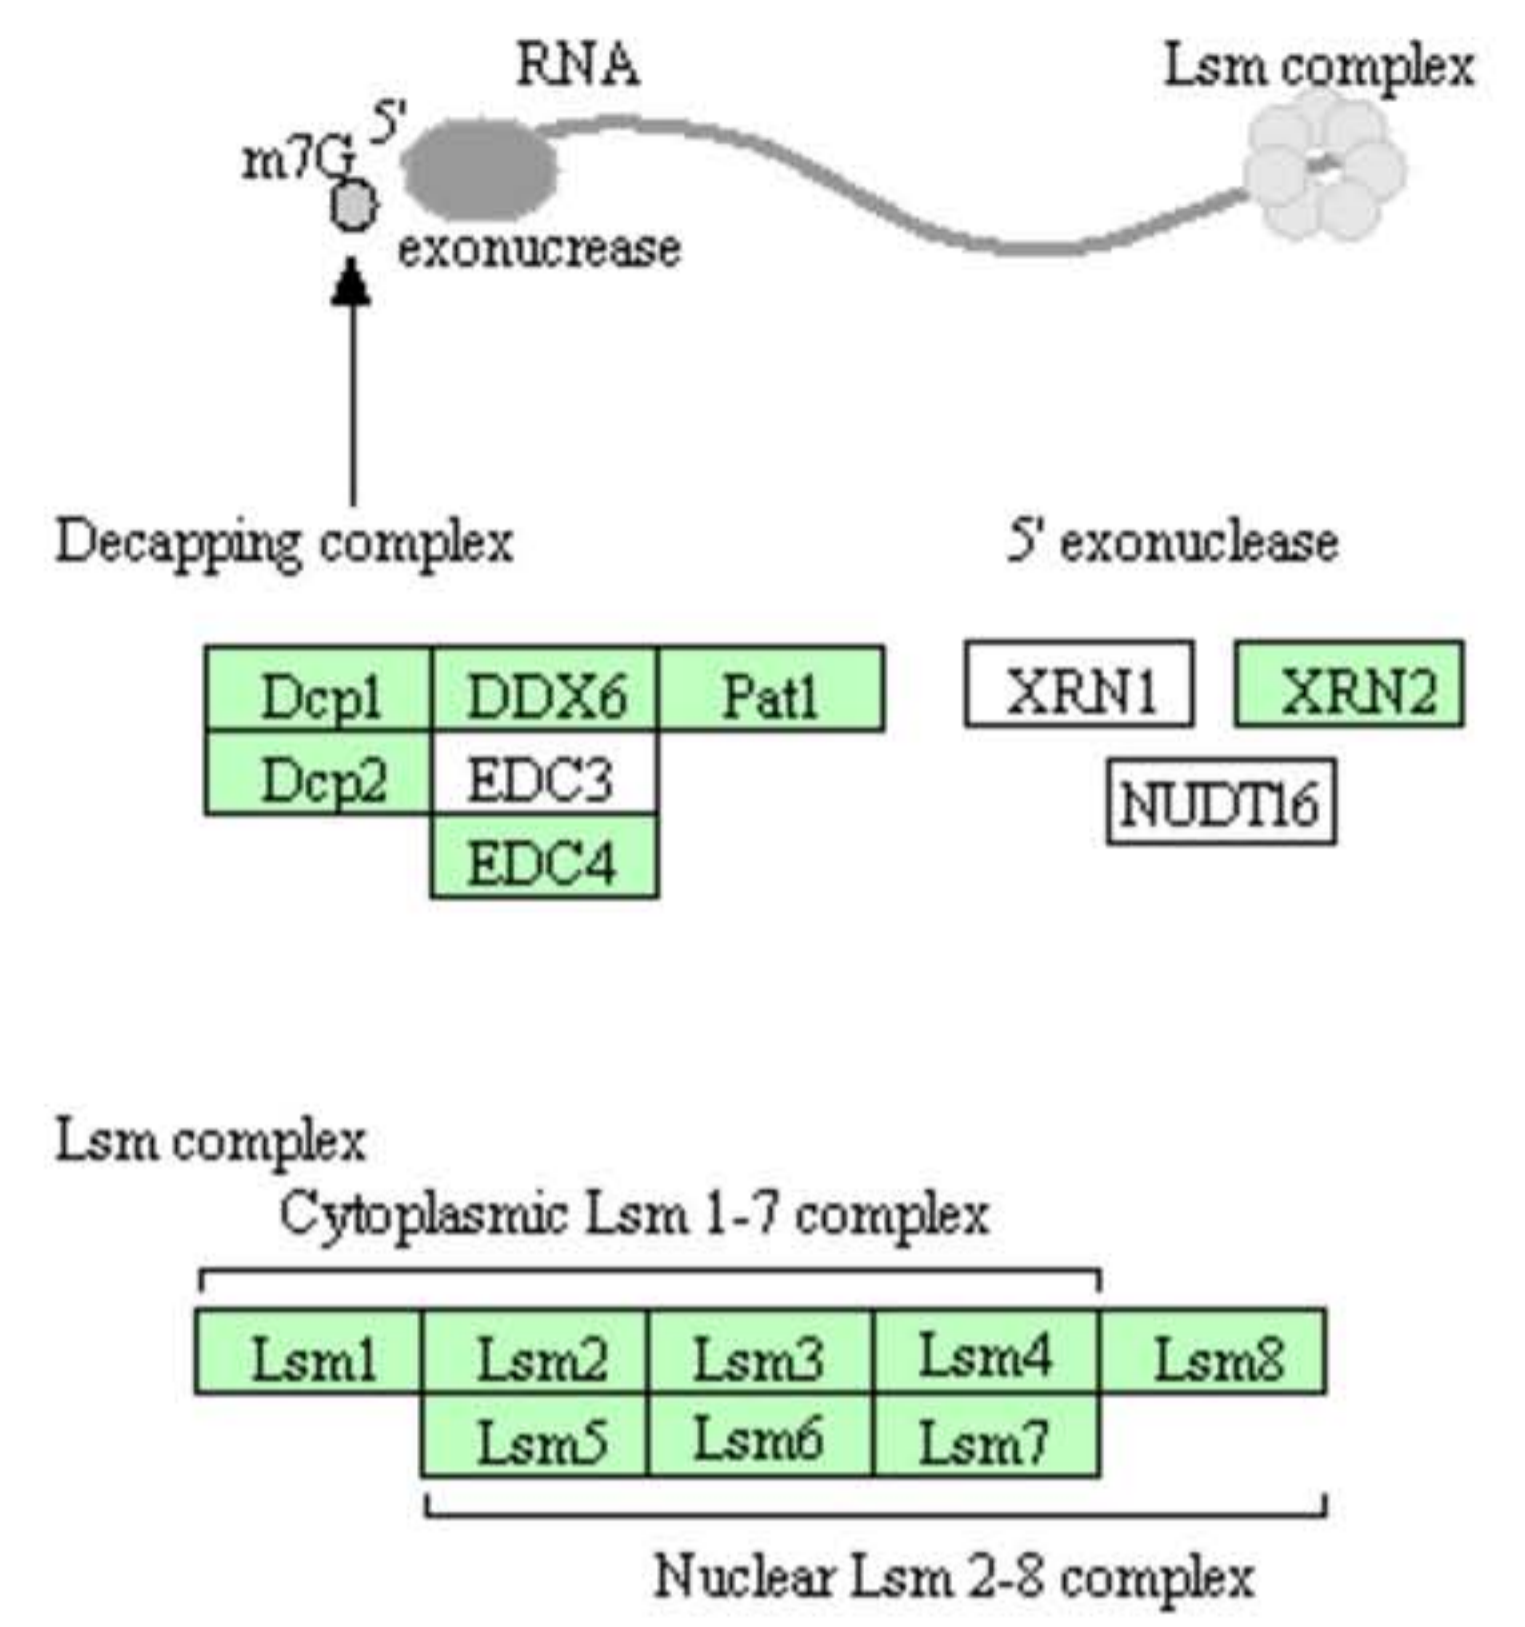

## Bacterial RNA degradation

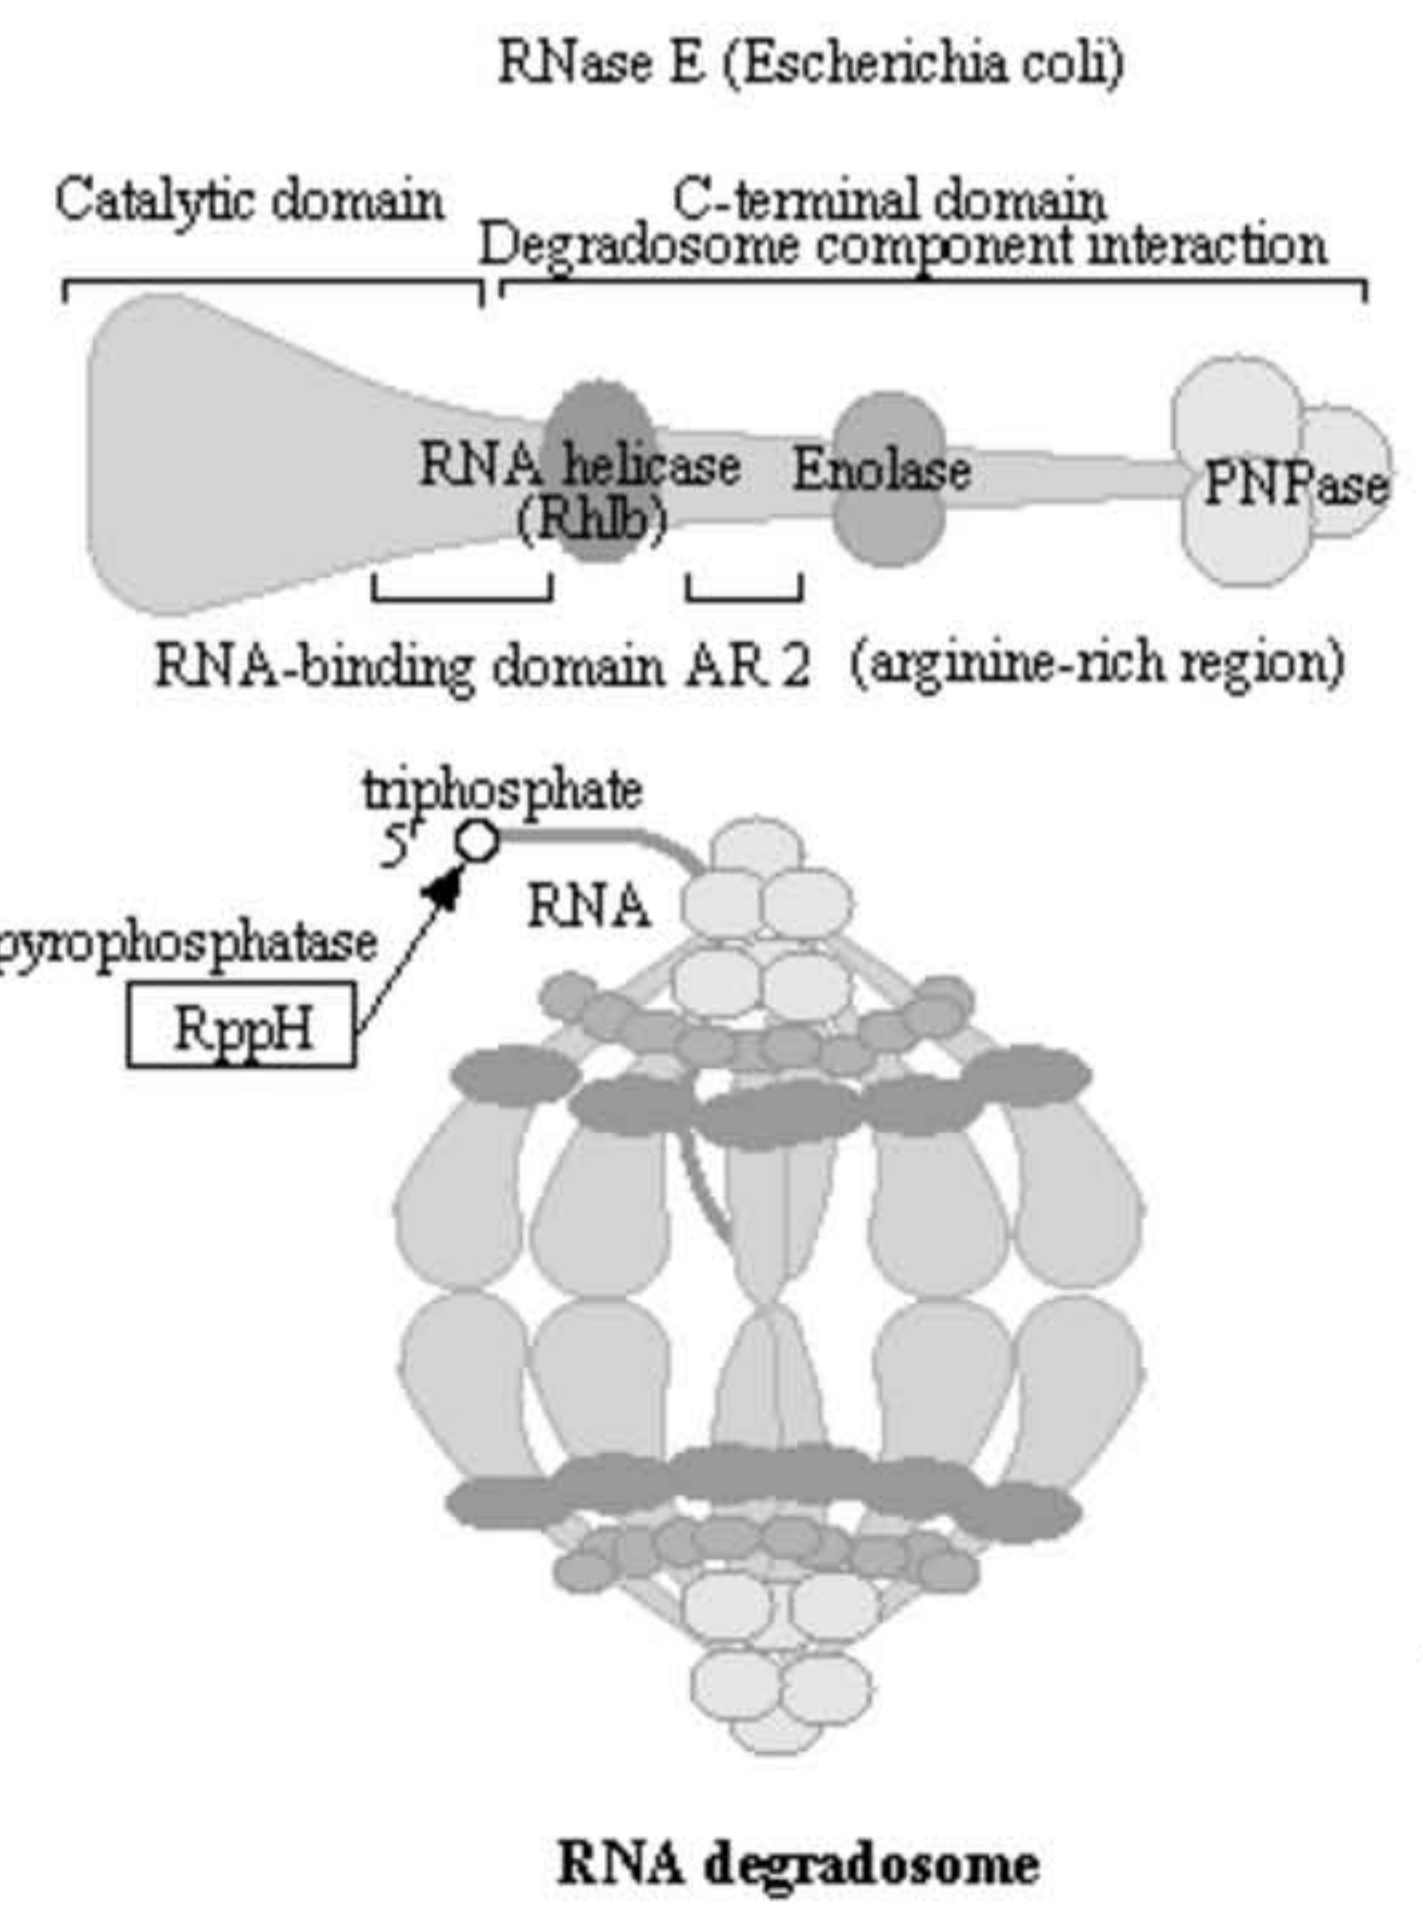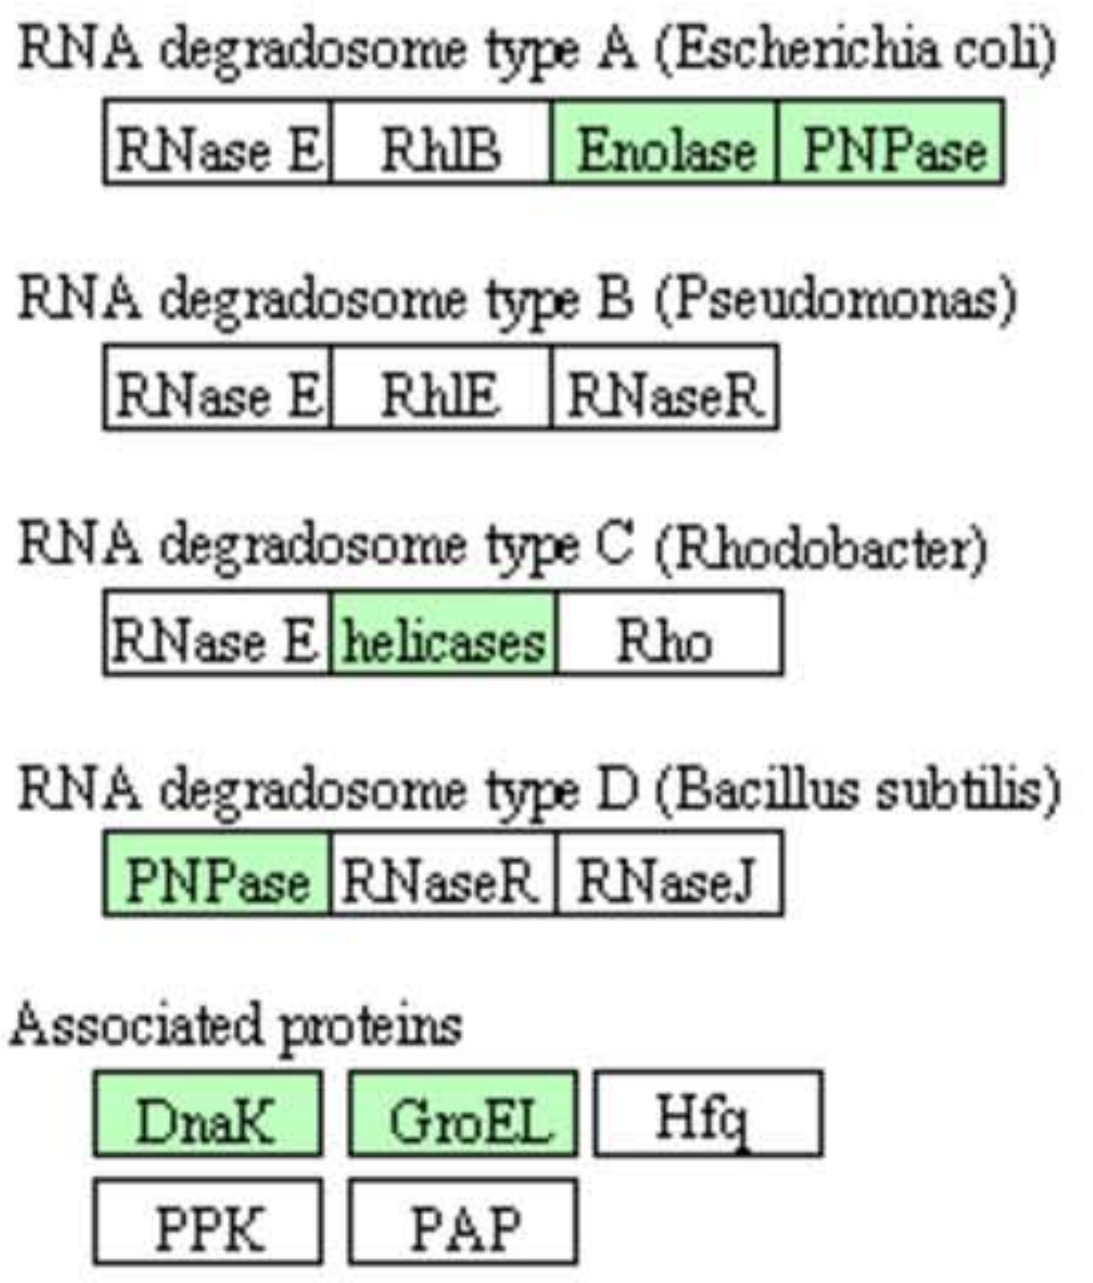

## Archeal RNA degradation

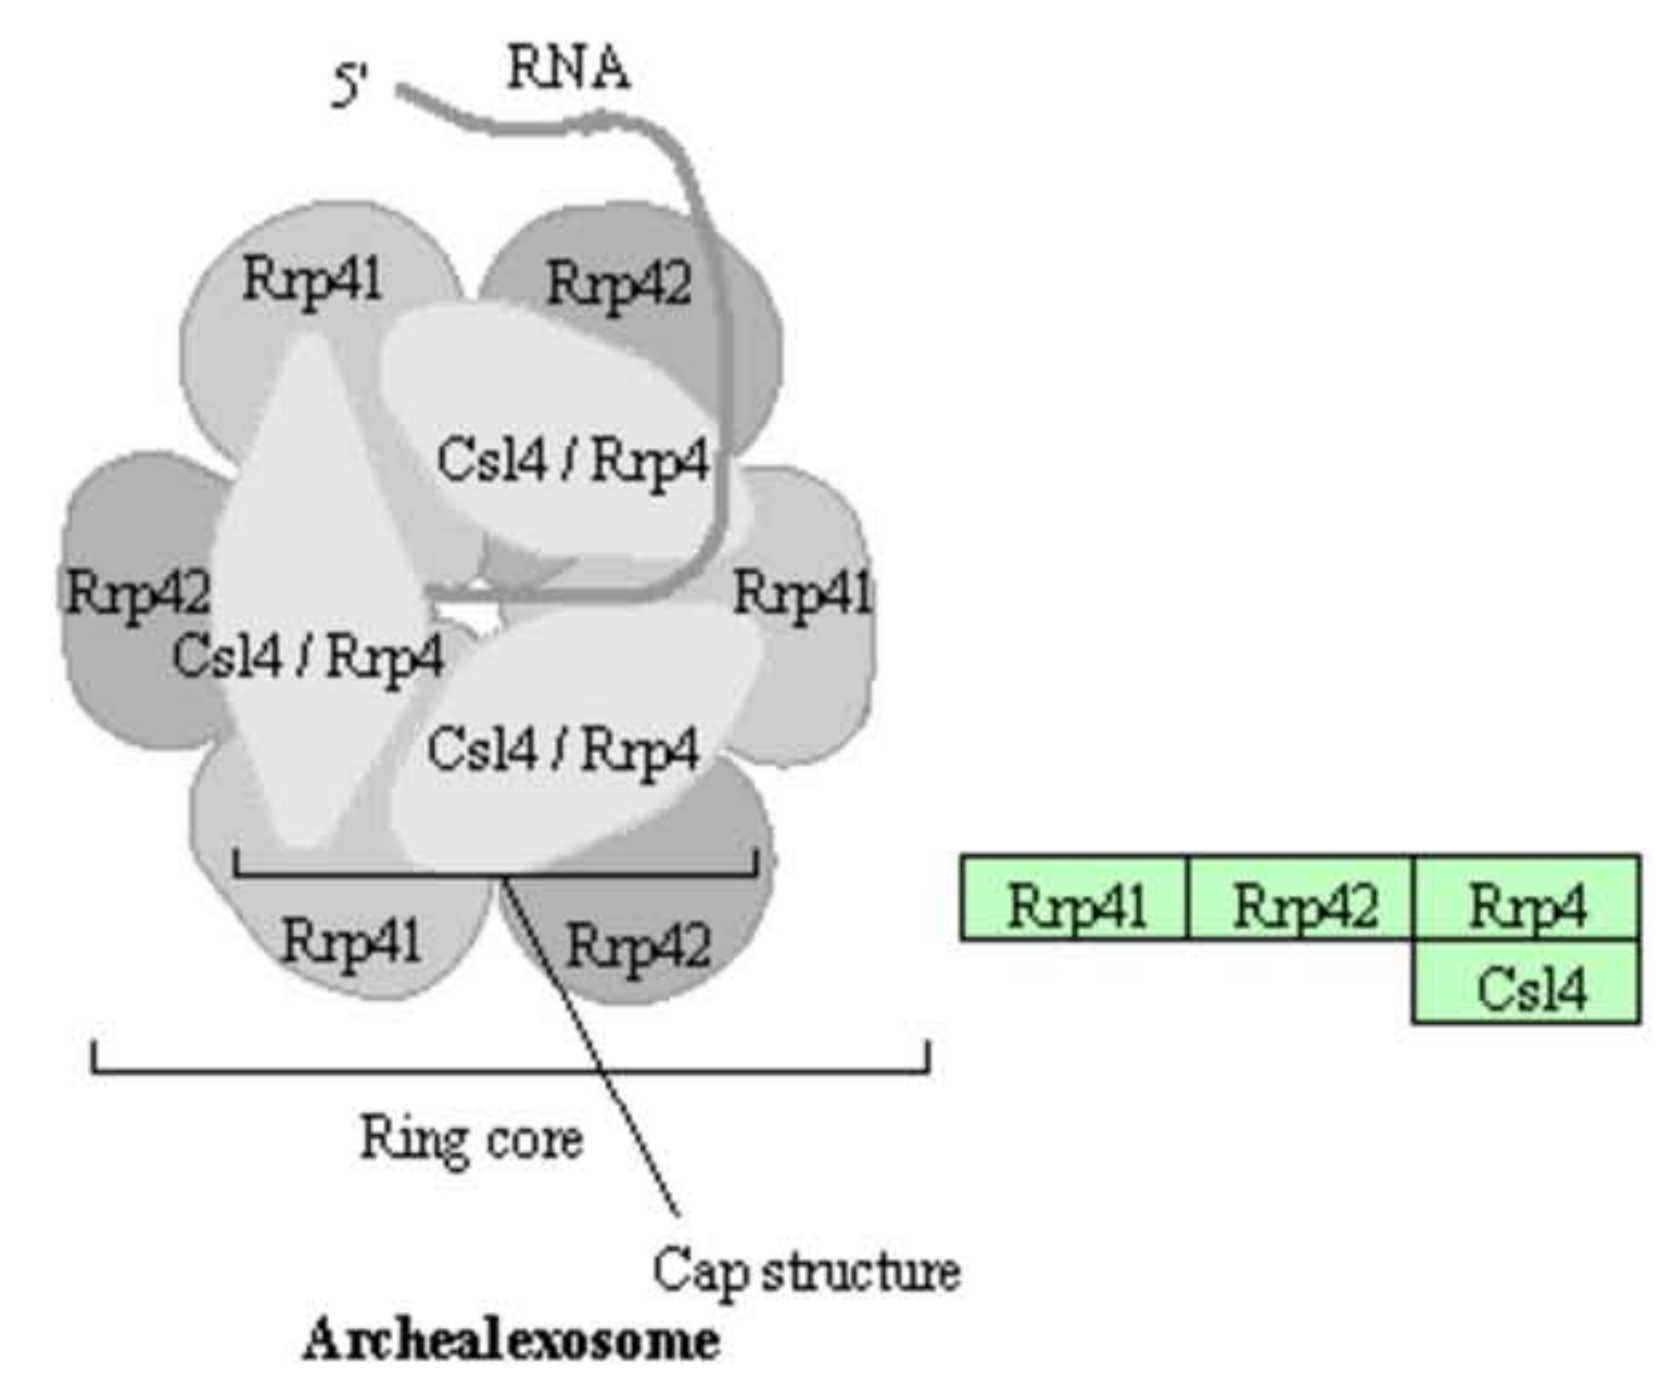



RNA POLYMERASE

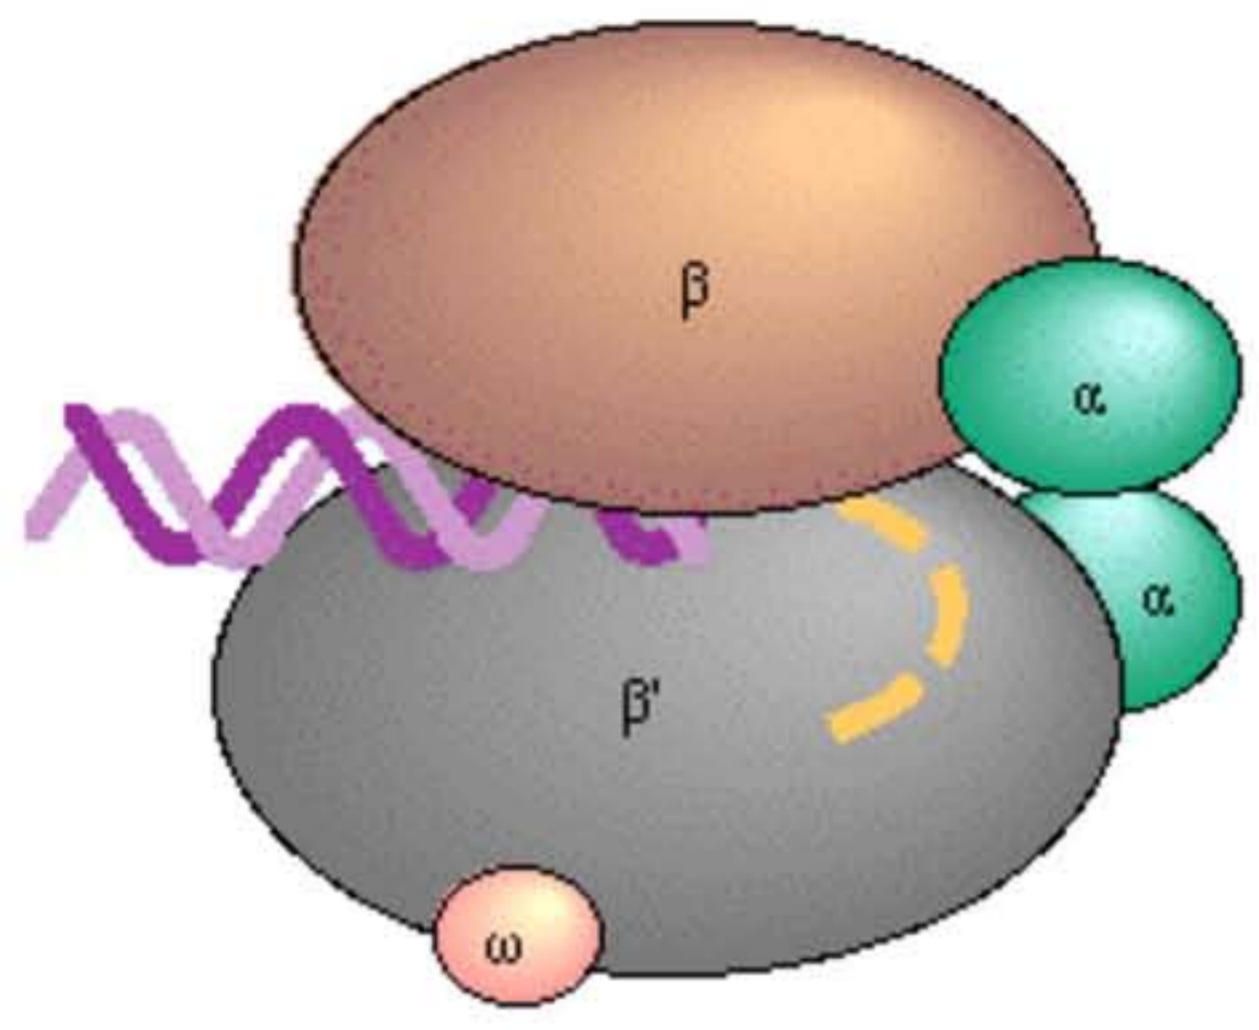

RNA polymerase (*Thermus aquaticus*)

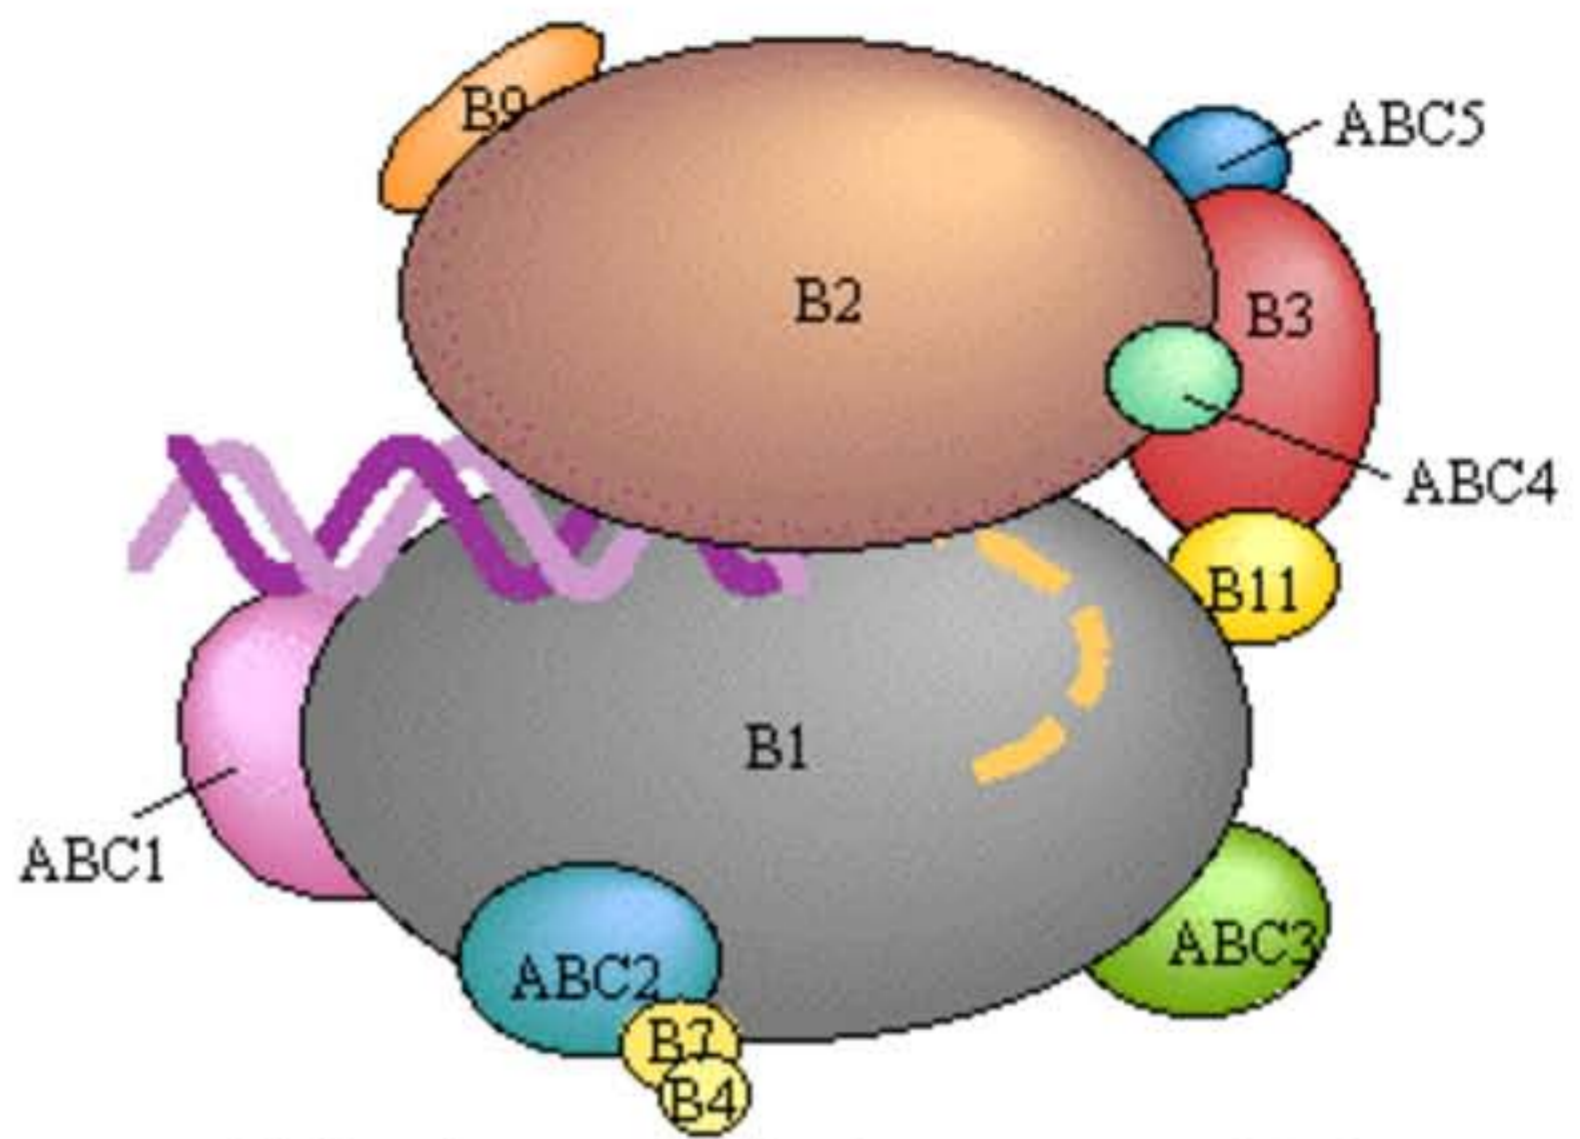

RNA polymerase II (*Saccharomyces cerevisiae*)

Bacterial

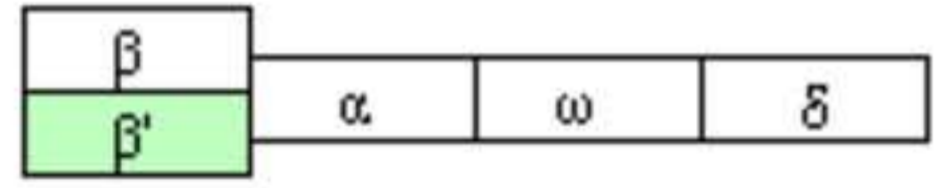

Archaeal

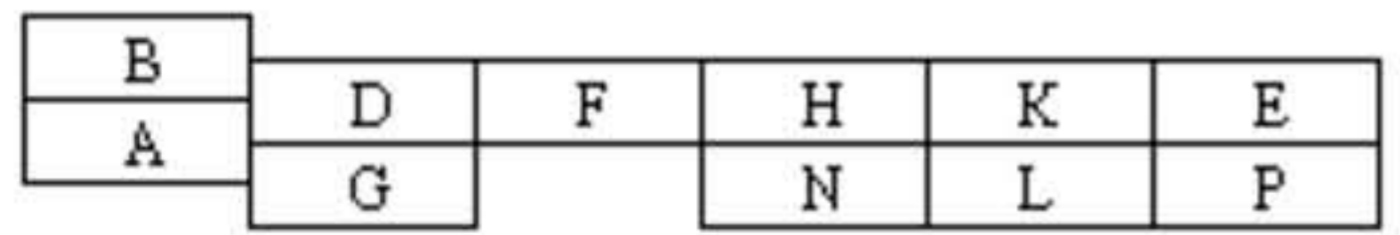

Eukaryotic Pol II

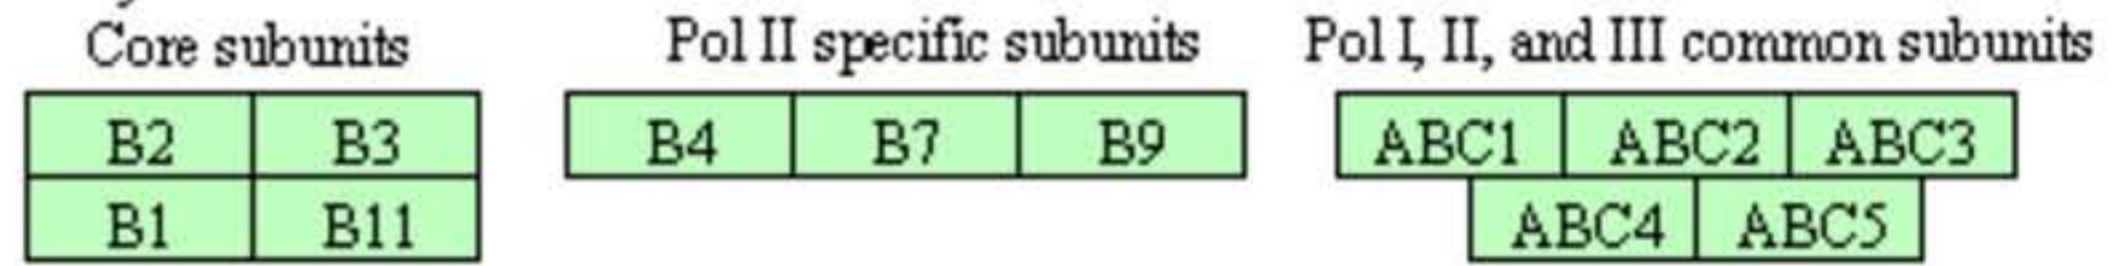

Eukaryotic Pol III

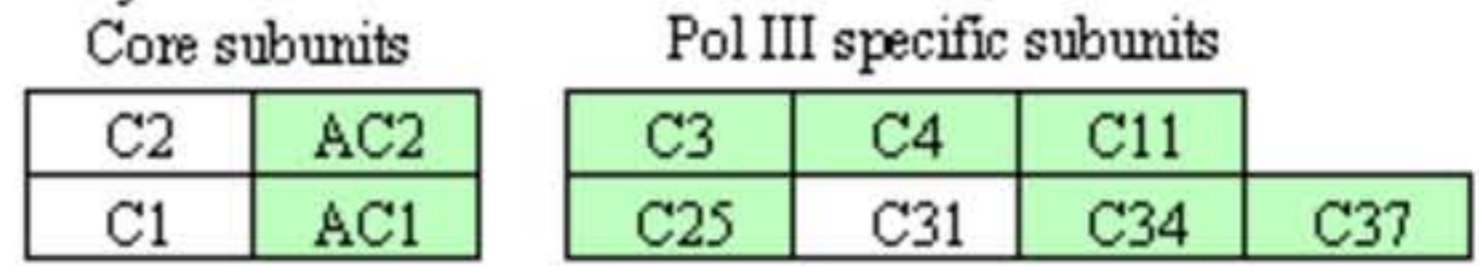

Eukaryotic Pol I

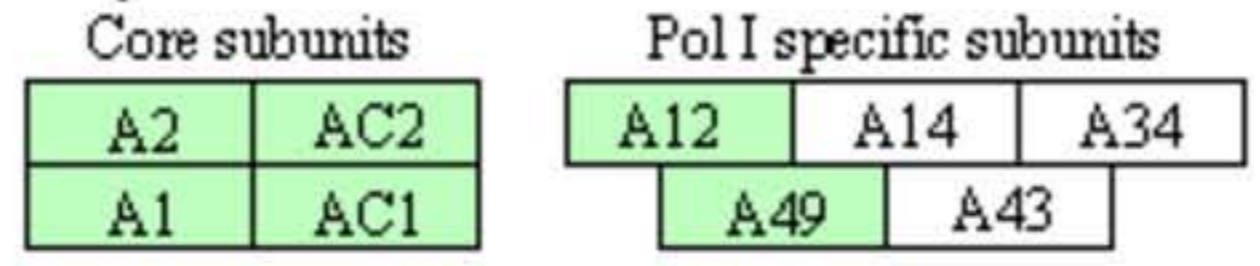



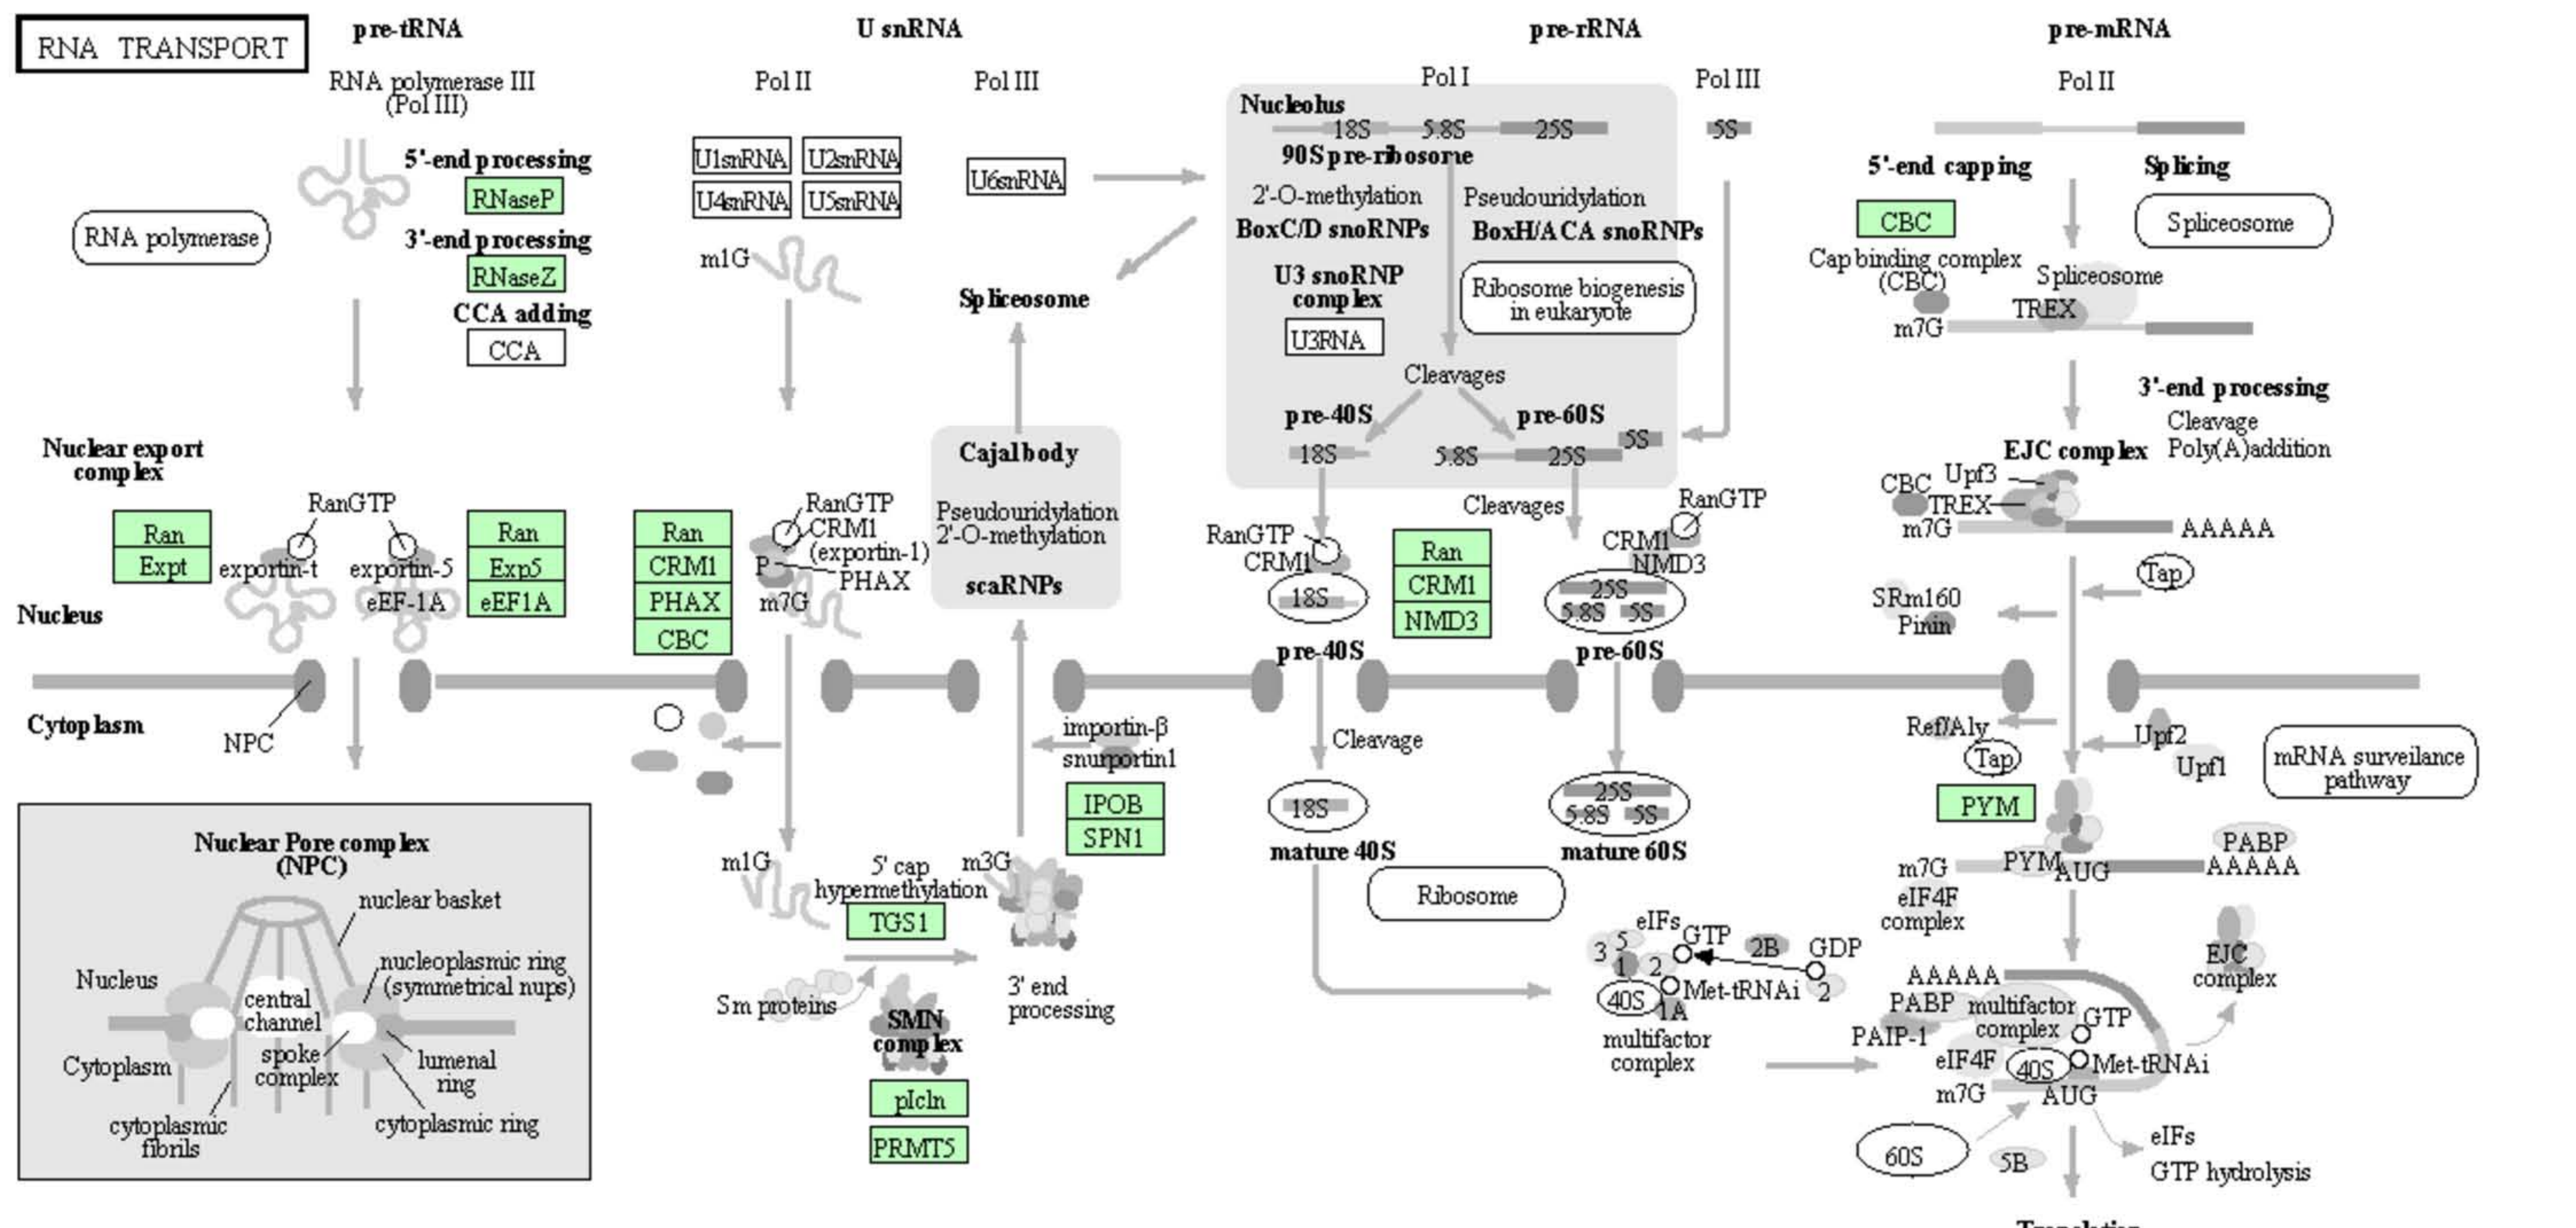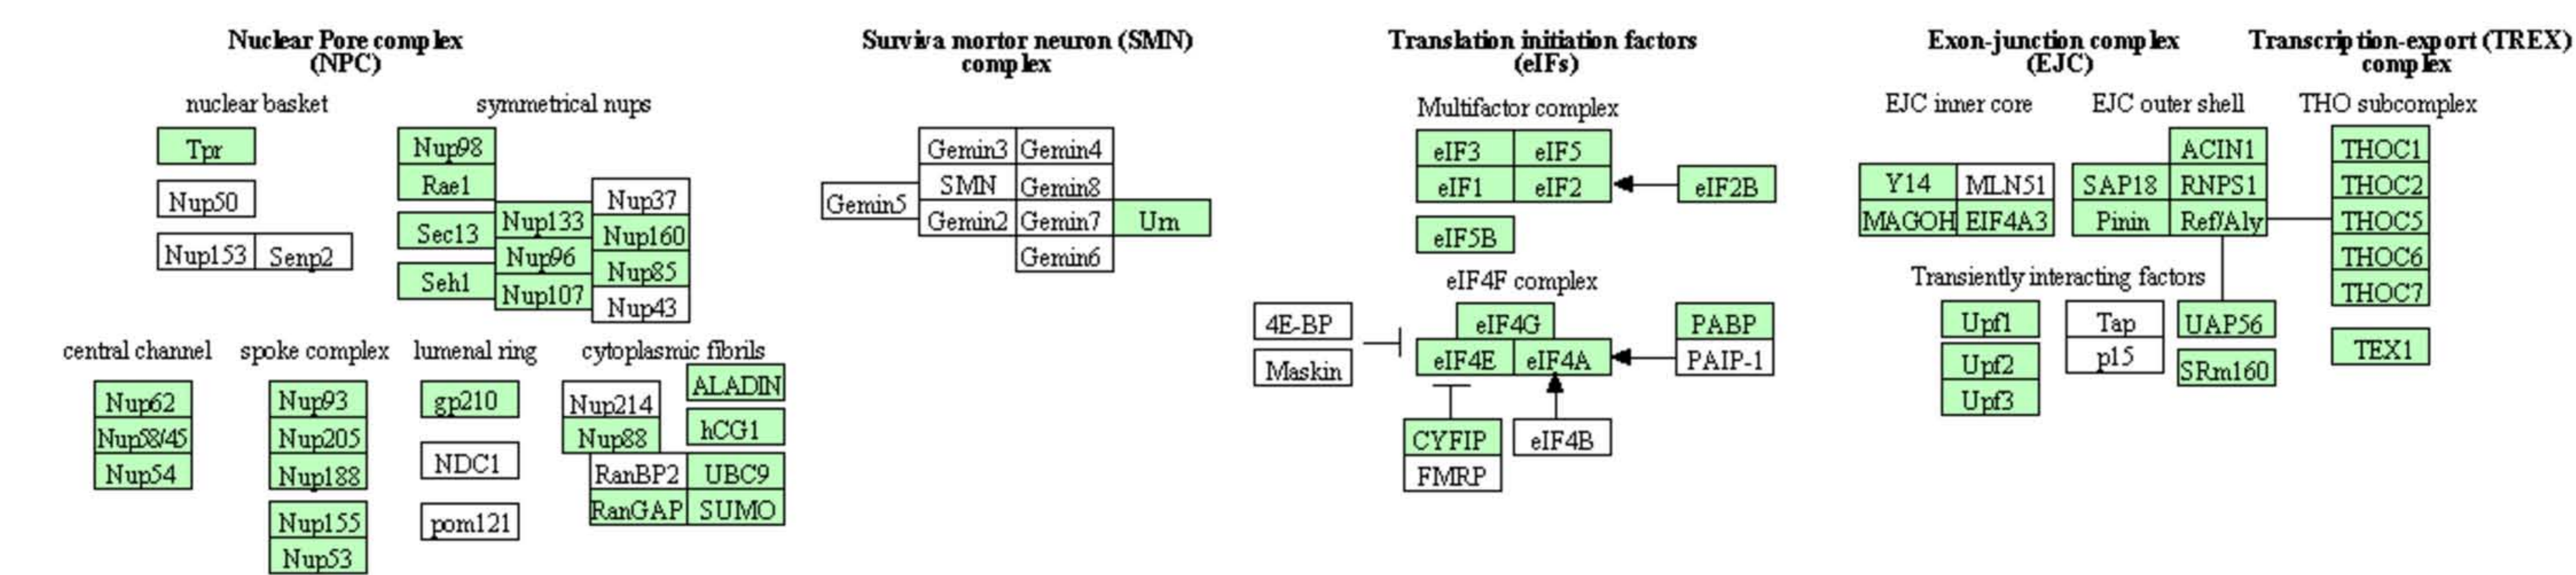



# SELENOCOMPOUND METABOLISM

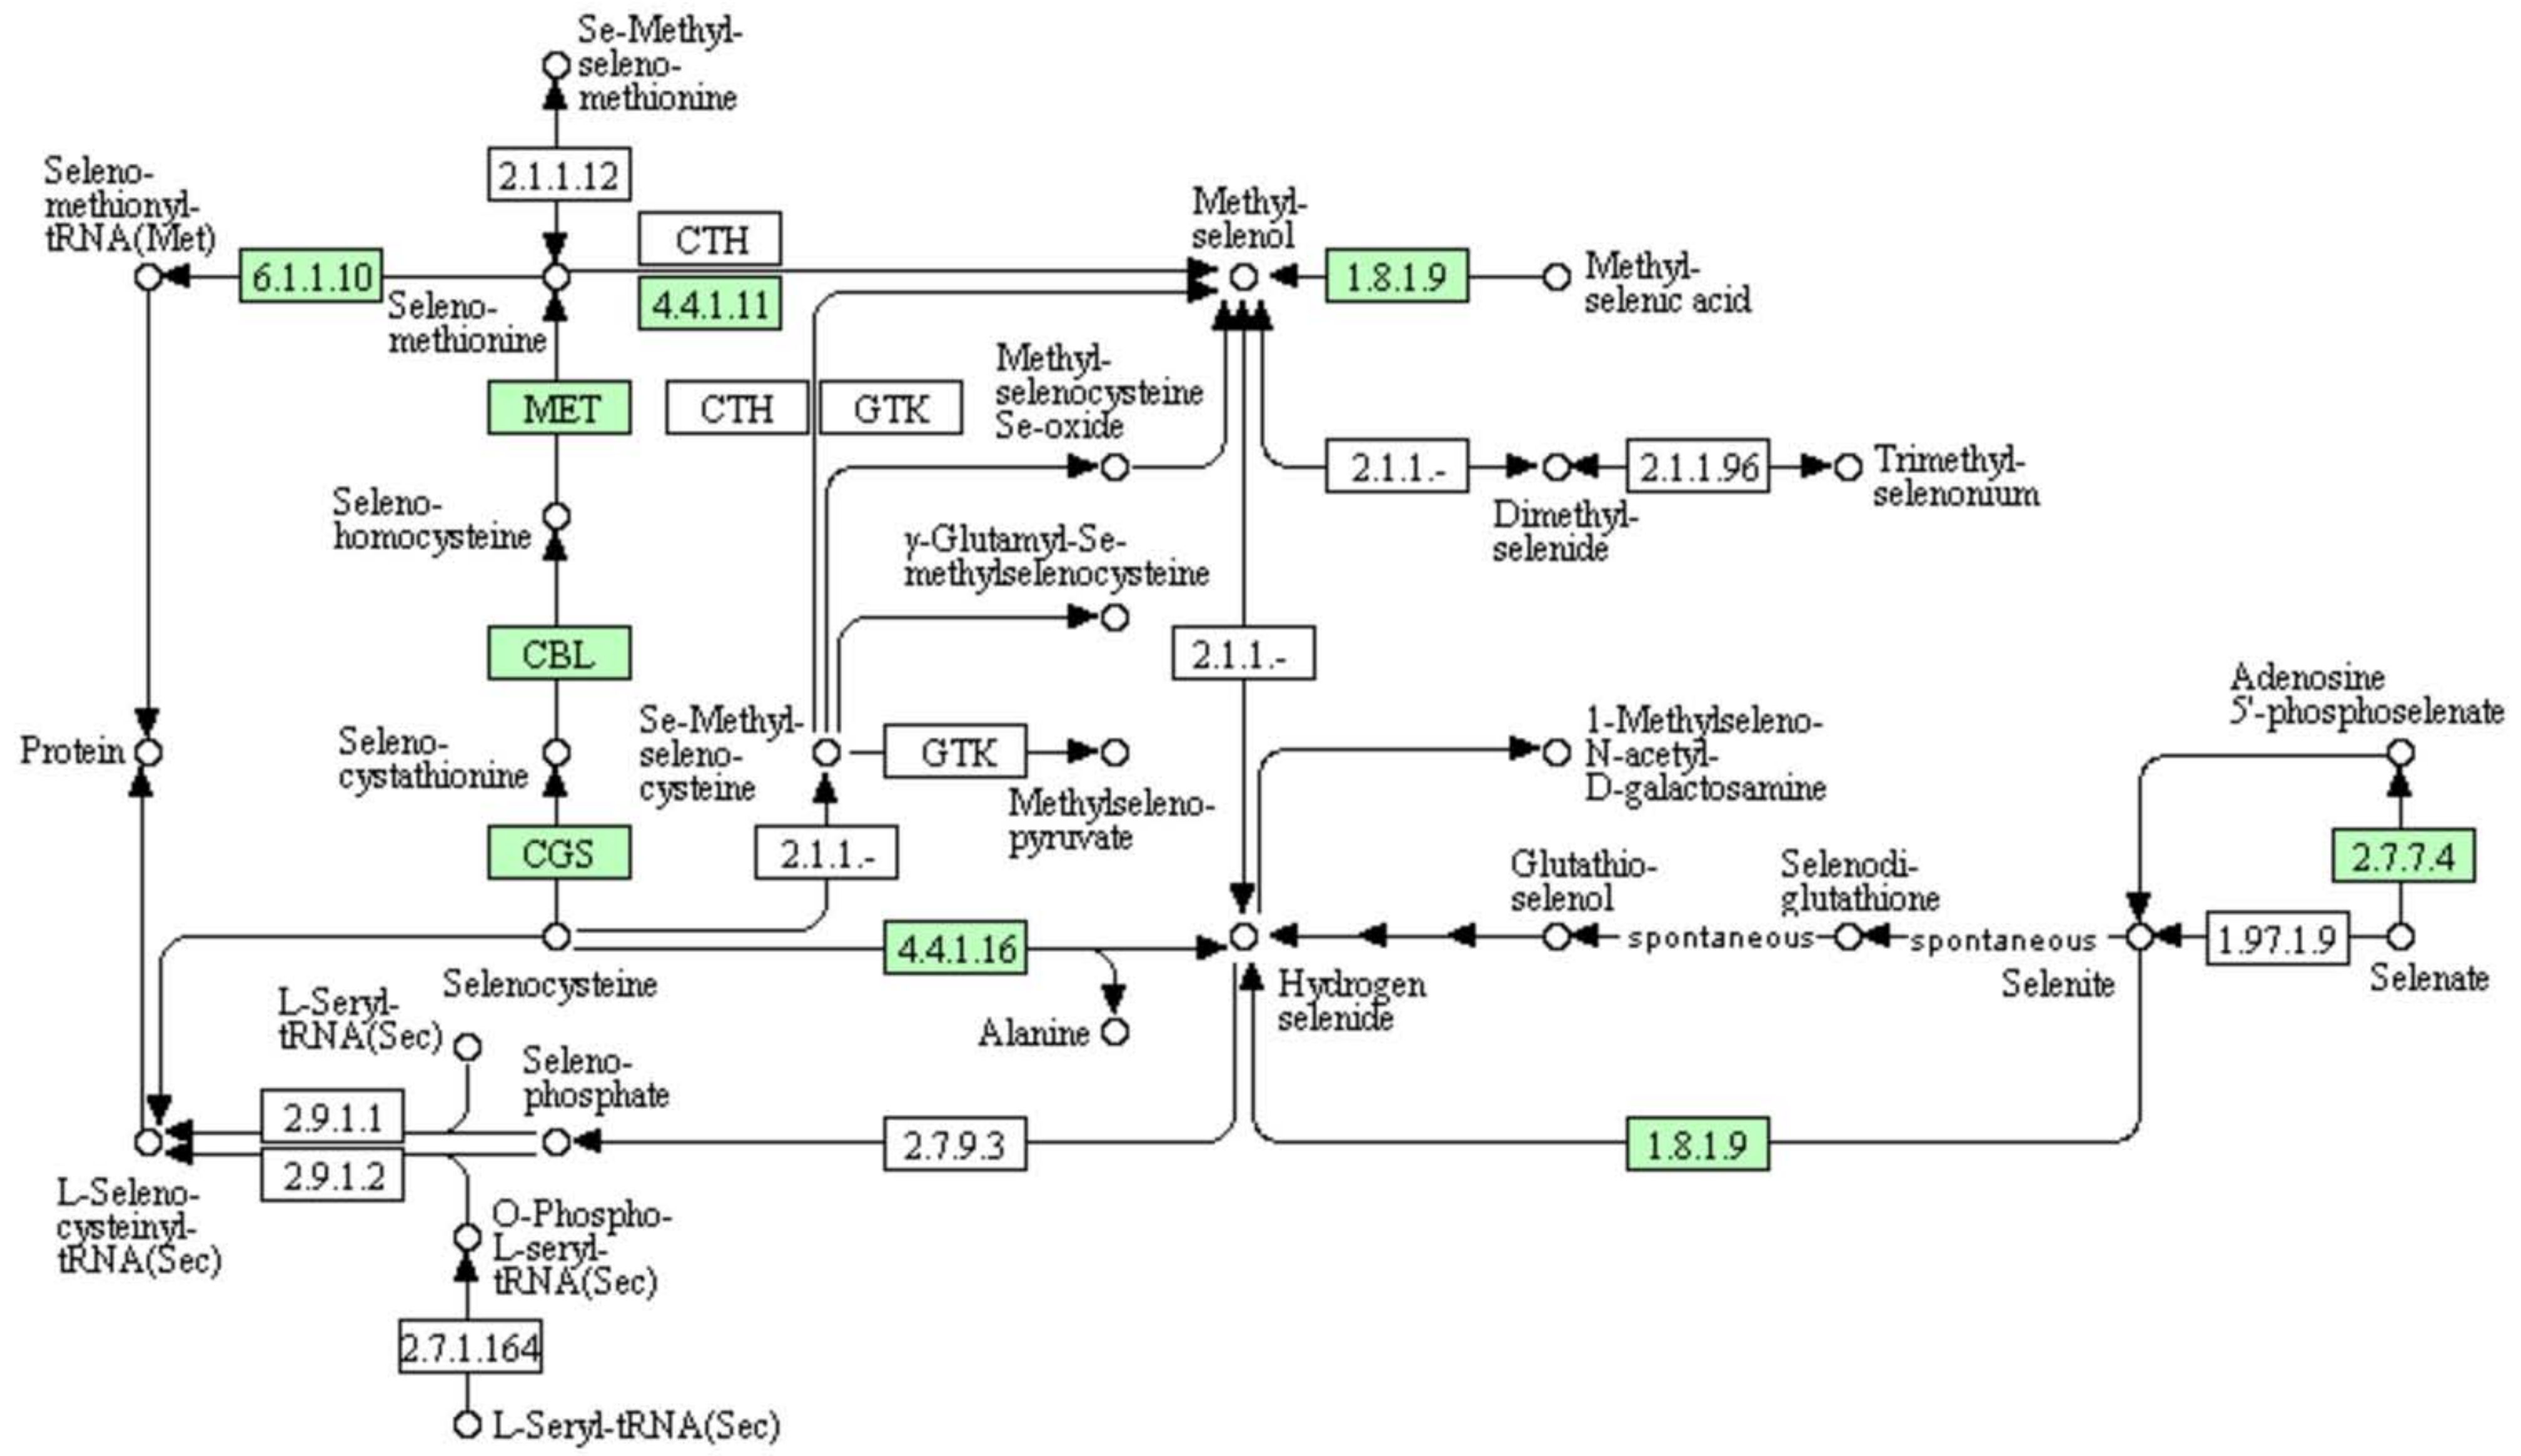



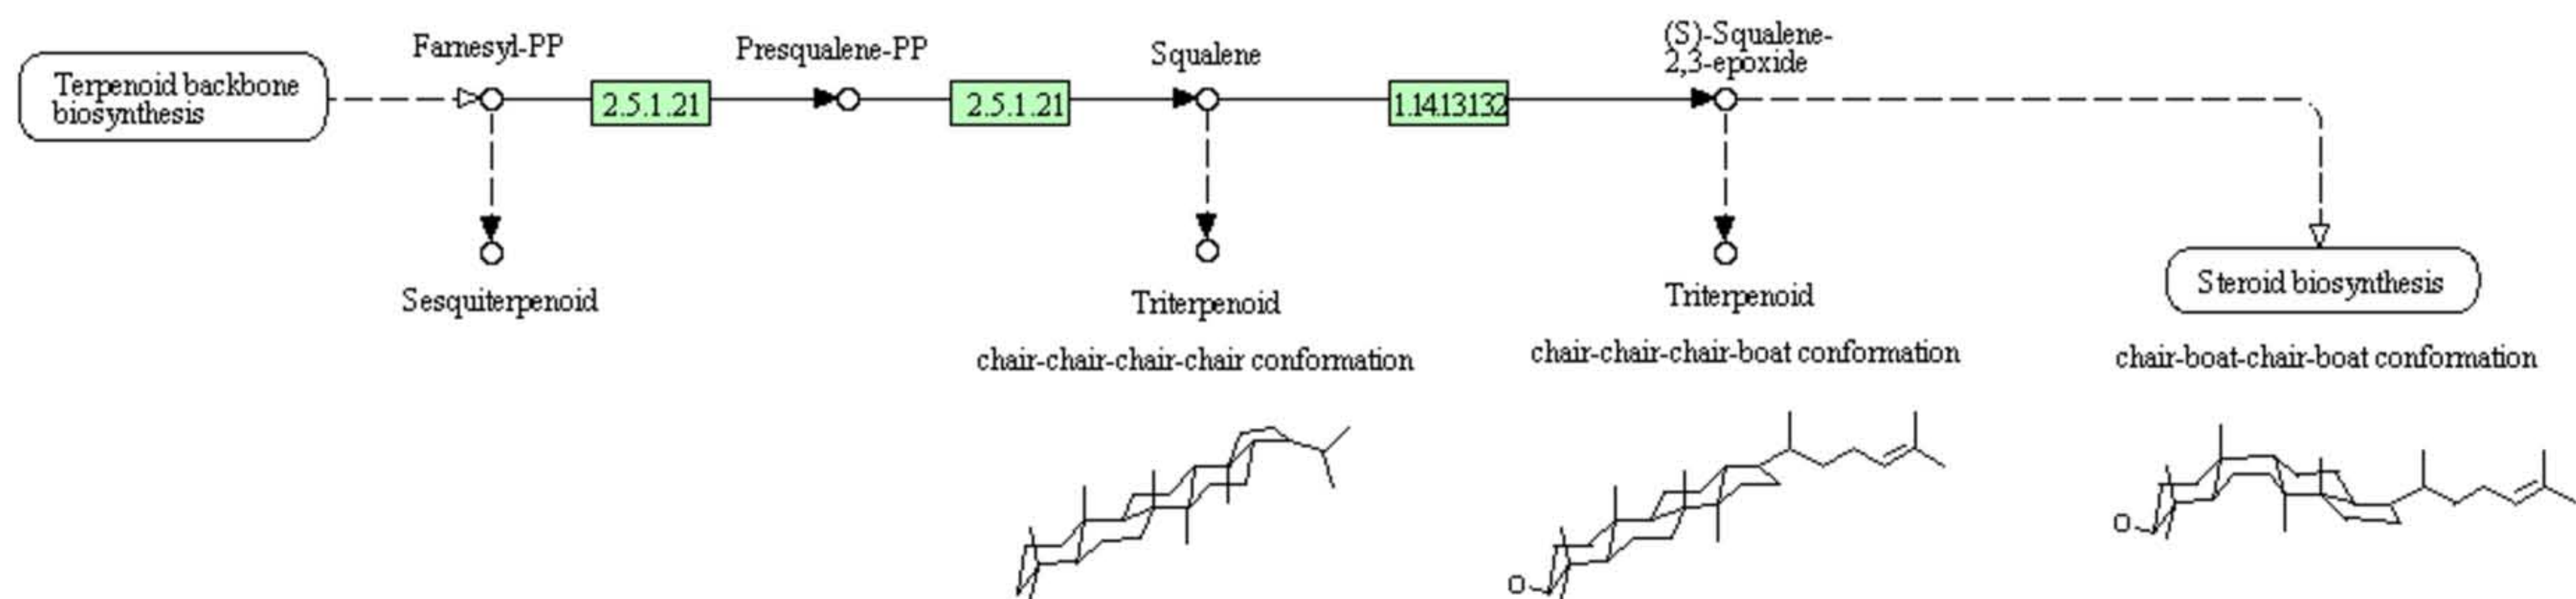

Sesquiterpenoid

Acyclic sesquiterpenoid

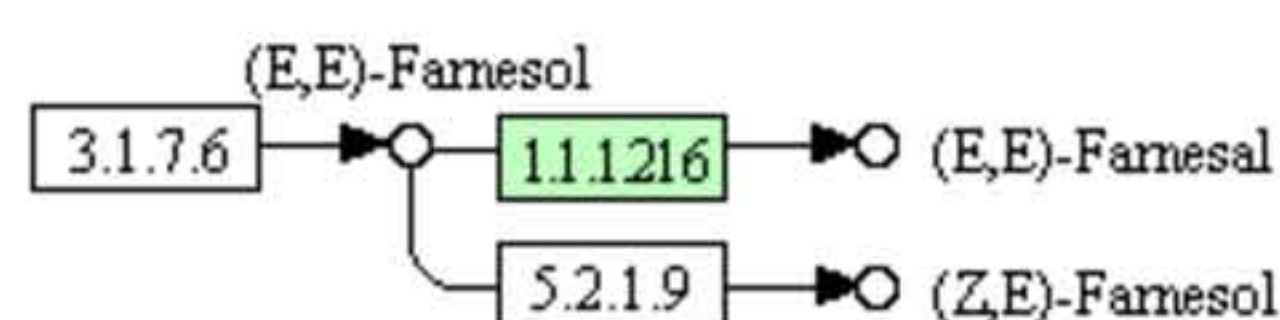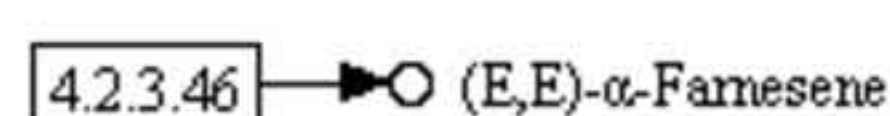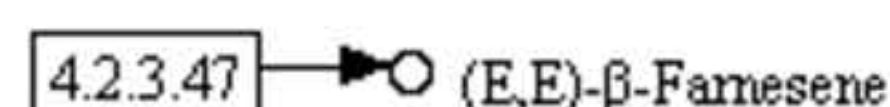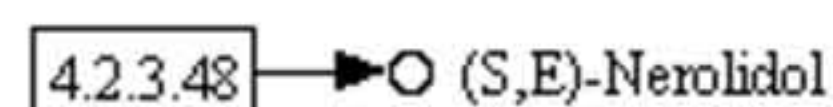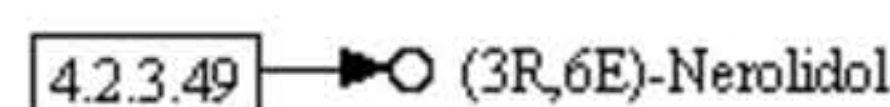

Bisabolene-type

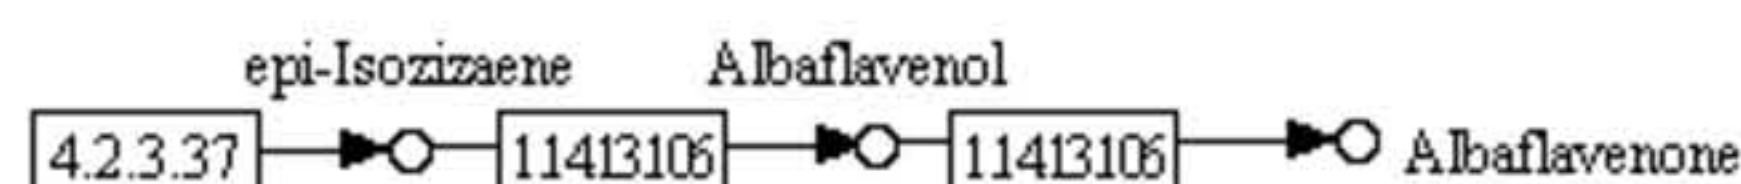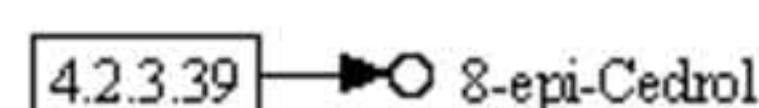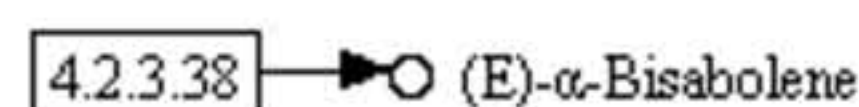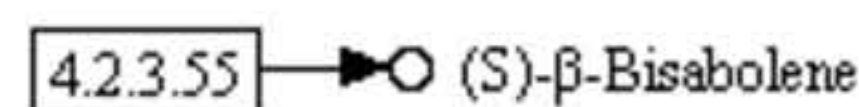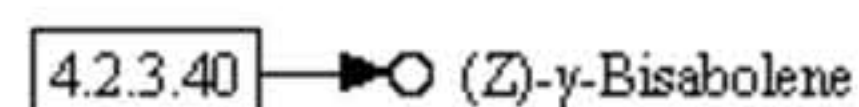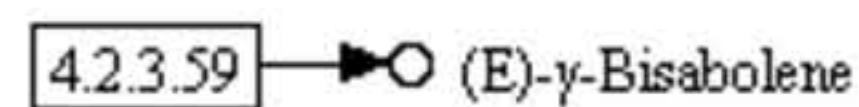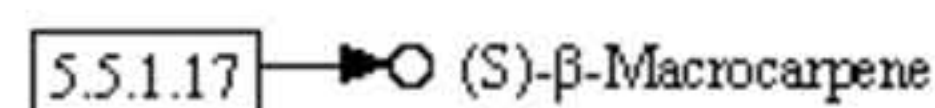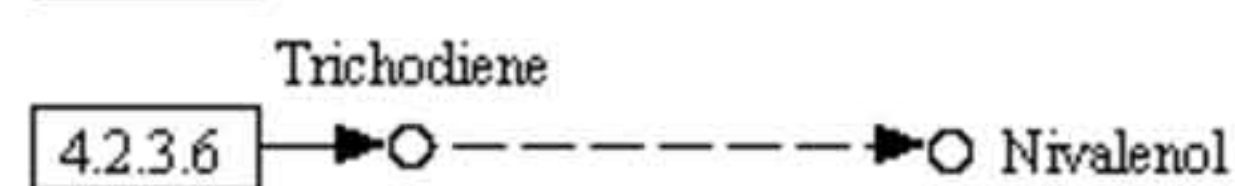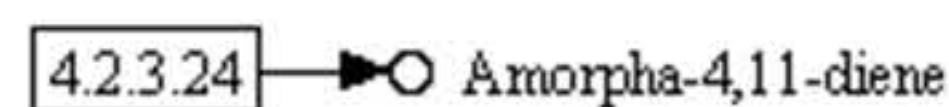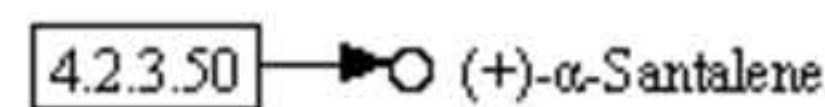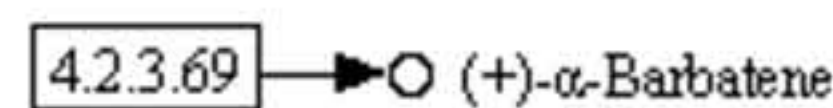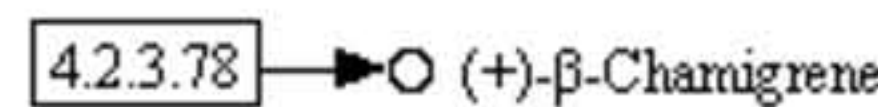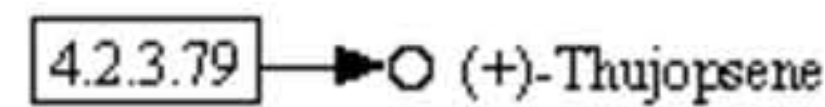

Germacren-type

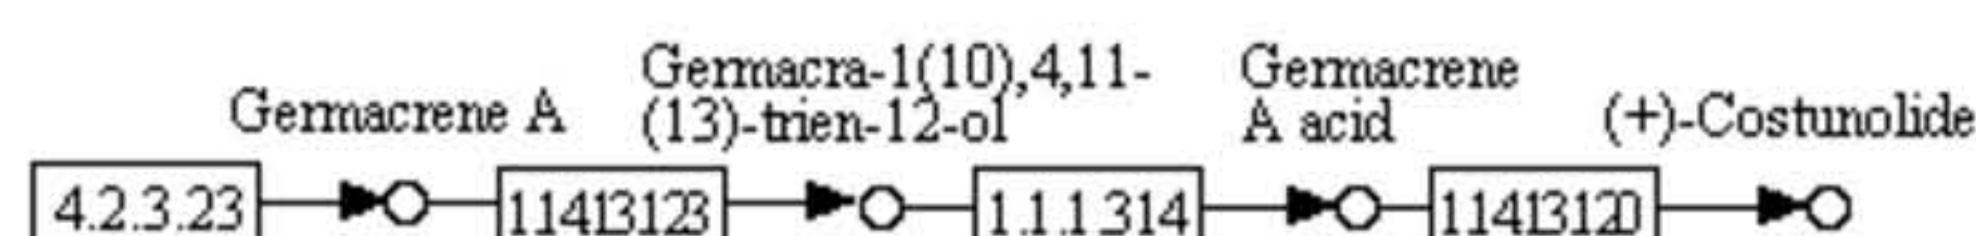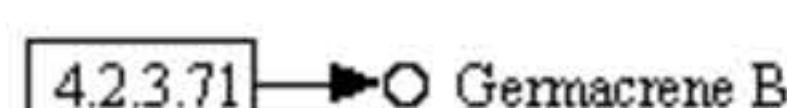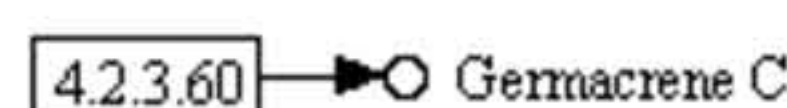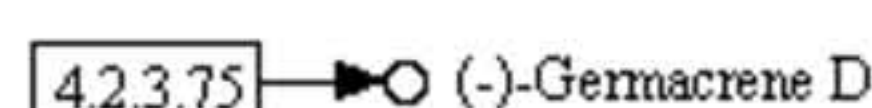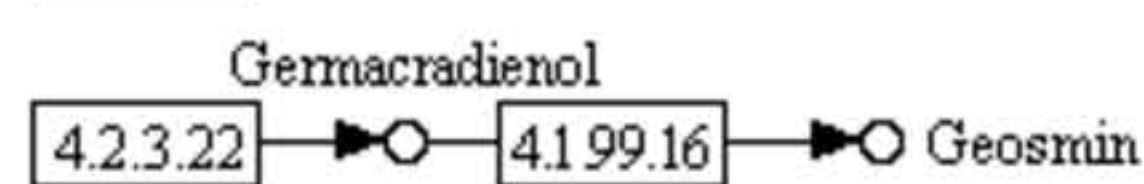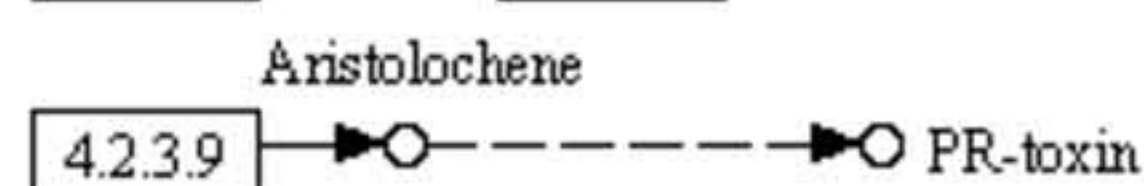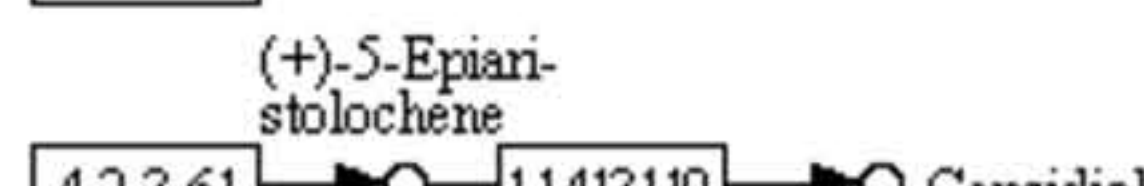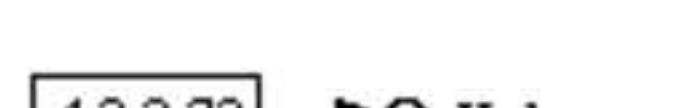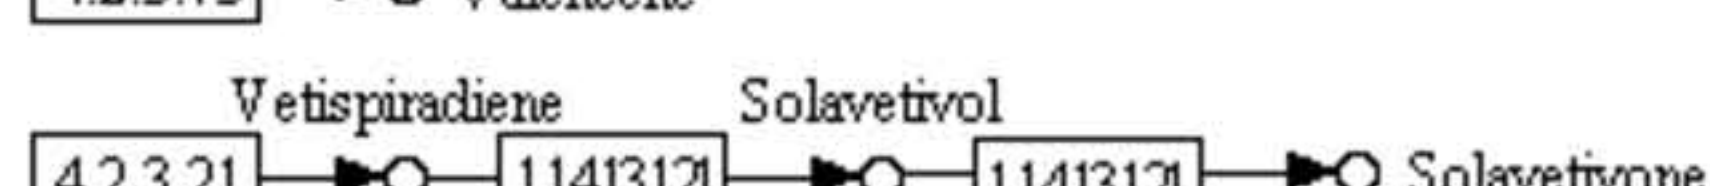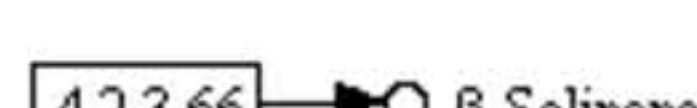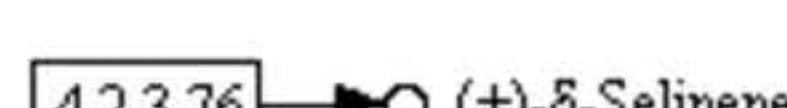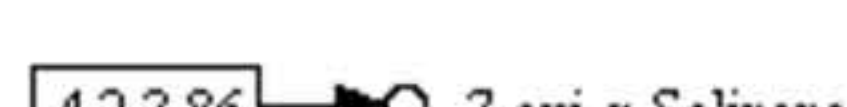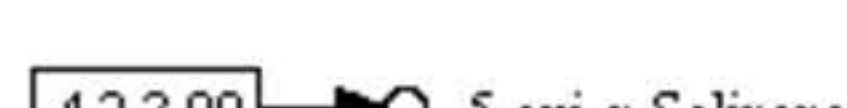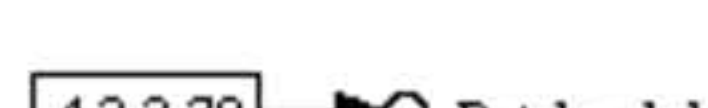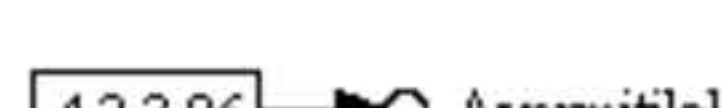

Humulene-type

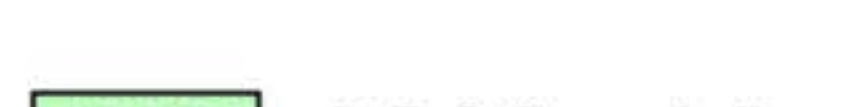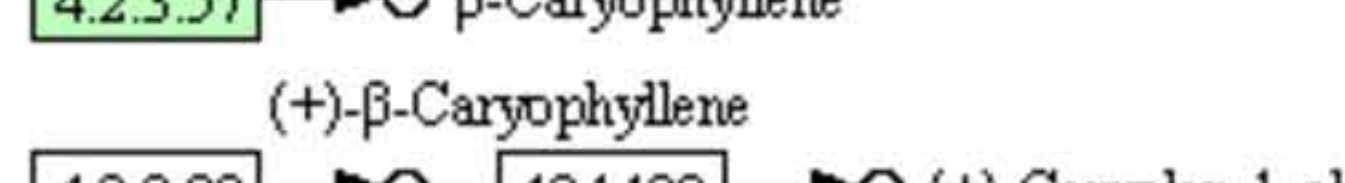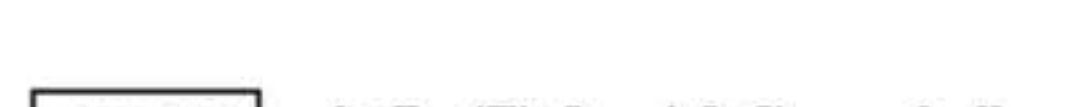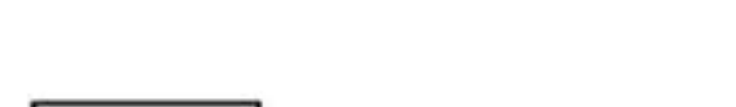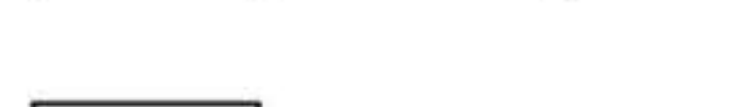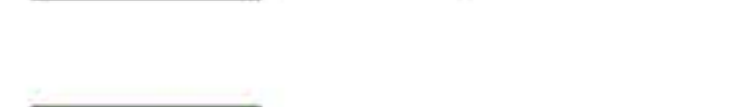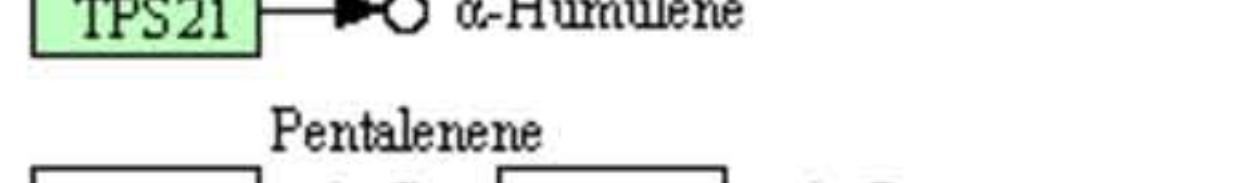

Cadinyl-type

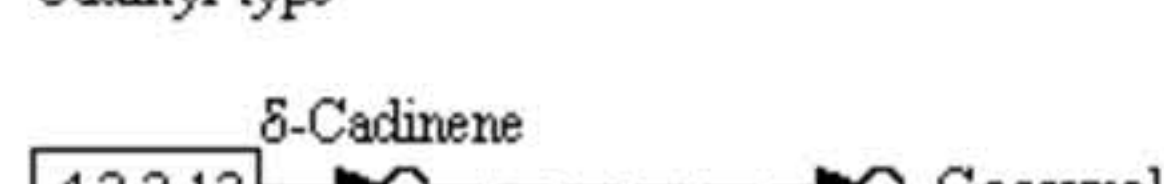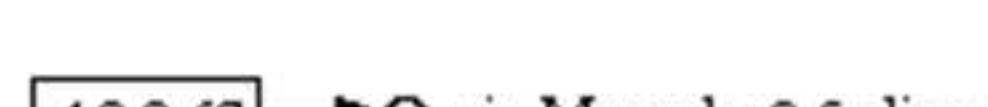

Triterpenoid chair-chair-chair-chair conformation

Hopene and Tetrahymanol

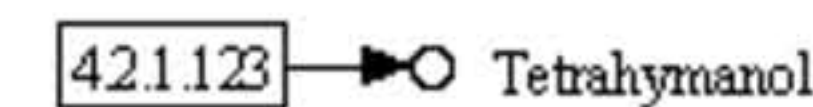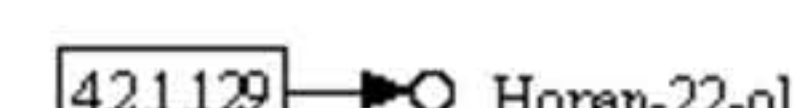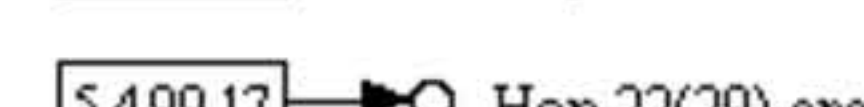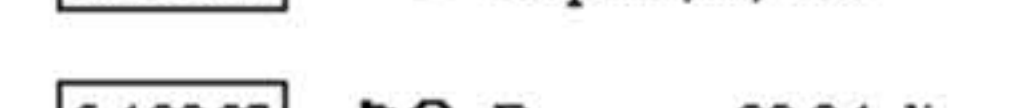

Triterpenoid chair-chair-chair-boat conformation

Protosteryl-type

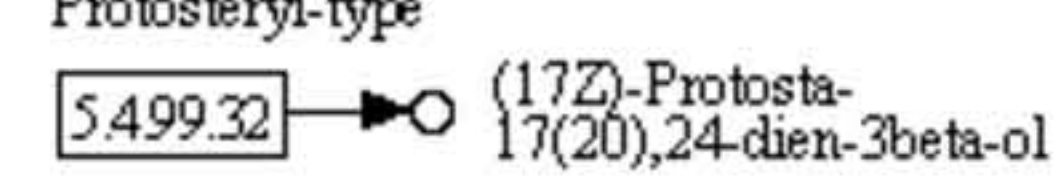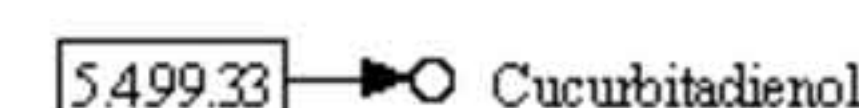

Dammarenyl-type

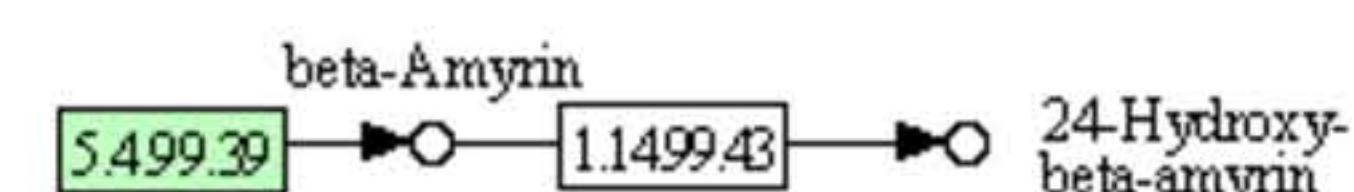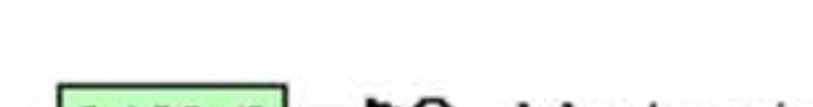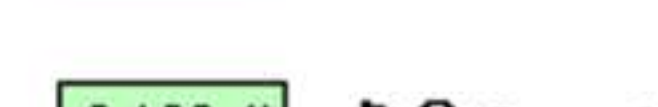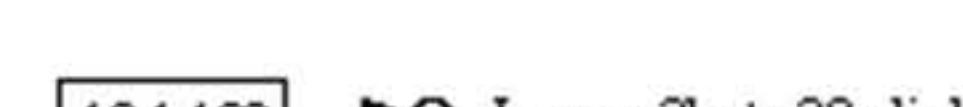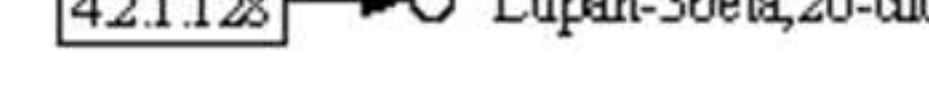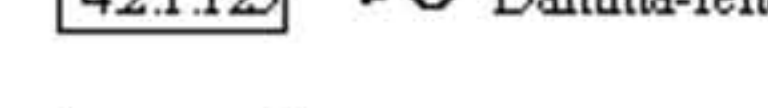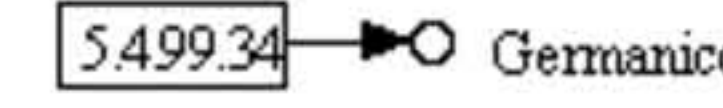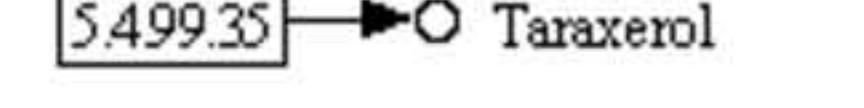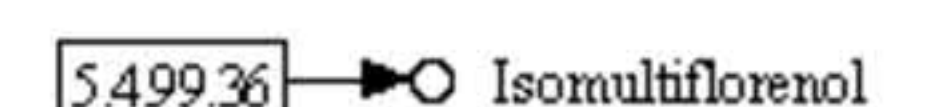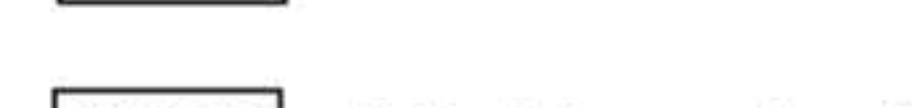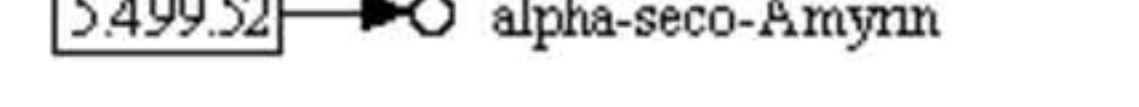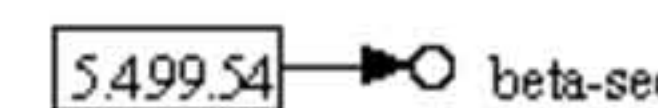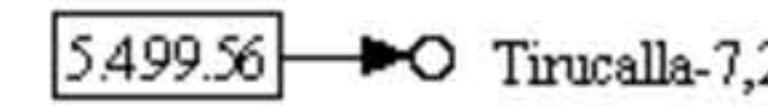

Other-type

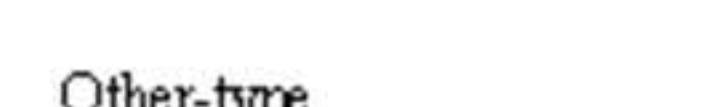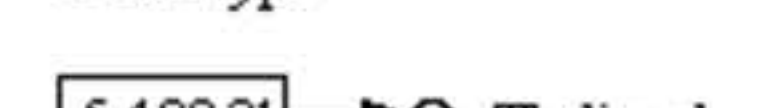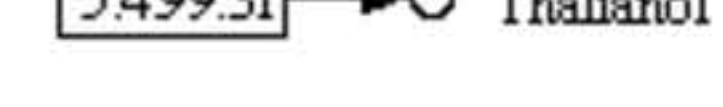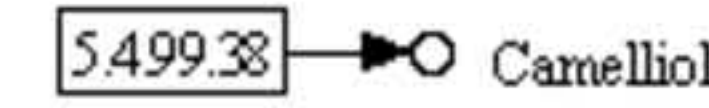



# SNARE INTERACTIONS IN VESICULAR TRANSPORT

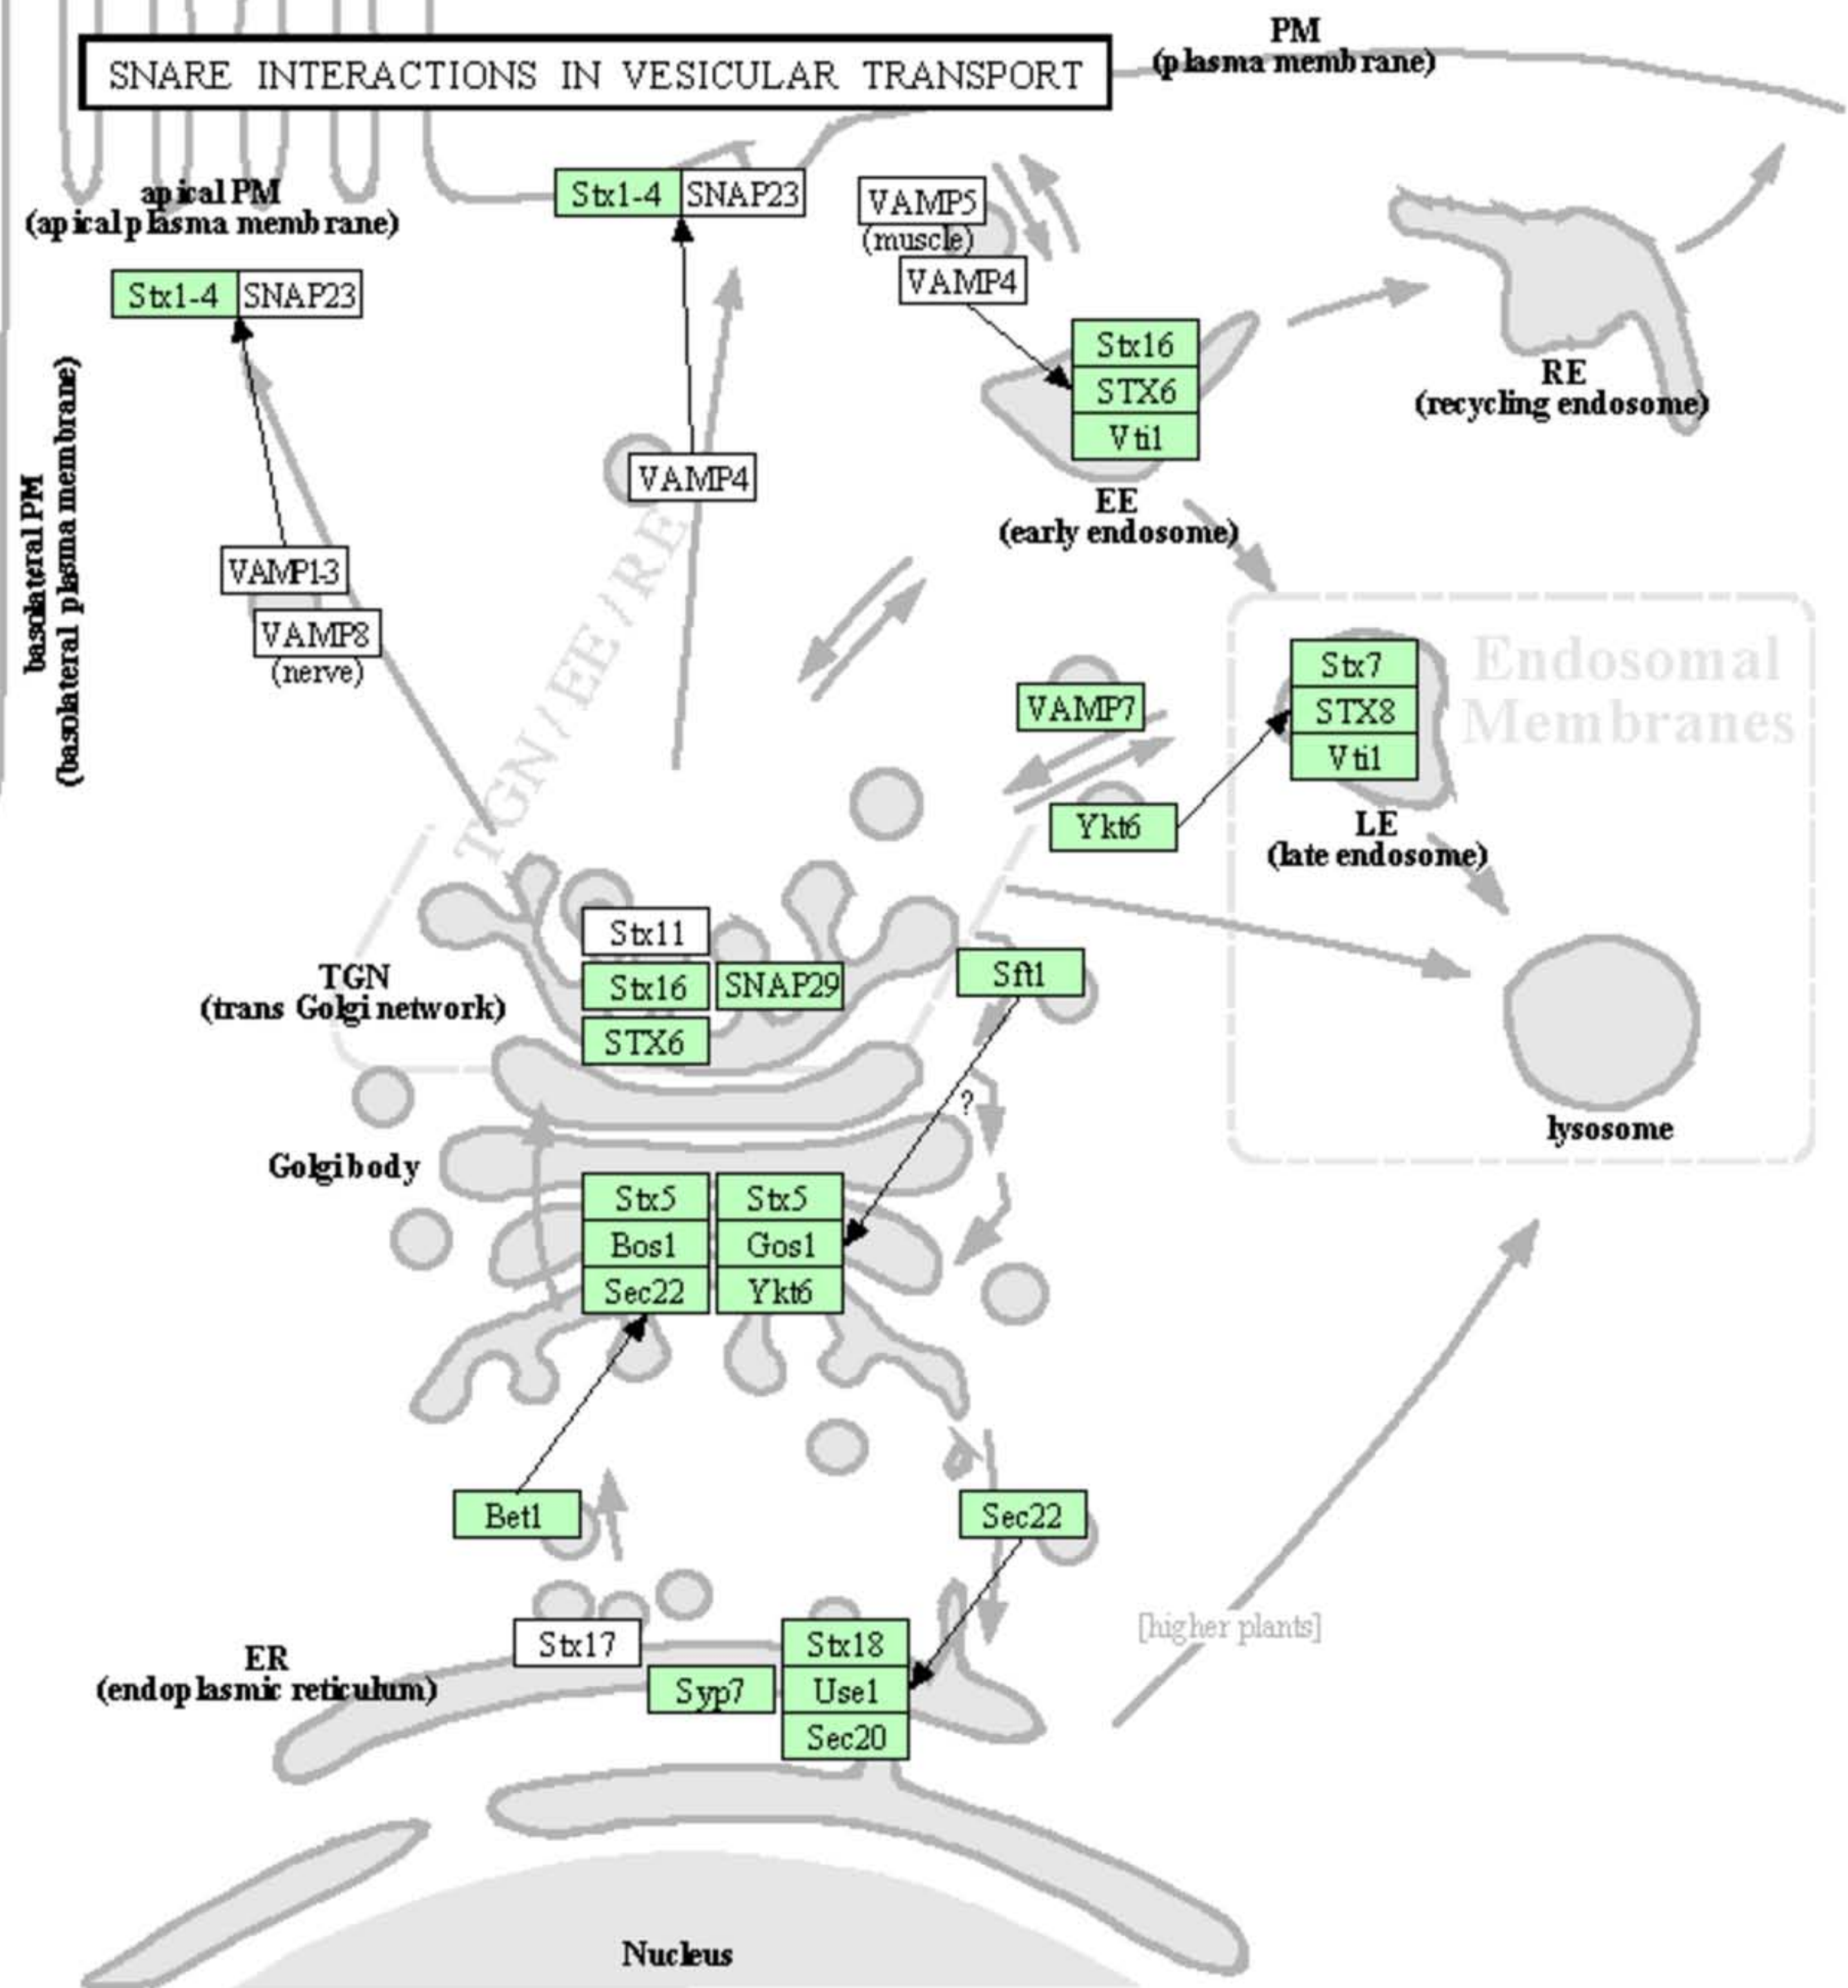







# SPLICEOSOME

pre-mRNA: 5' splice site (Exon GU) — Branch point (A) — 3' splice site (Exon AG) — Intron

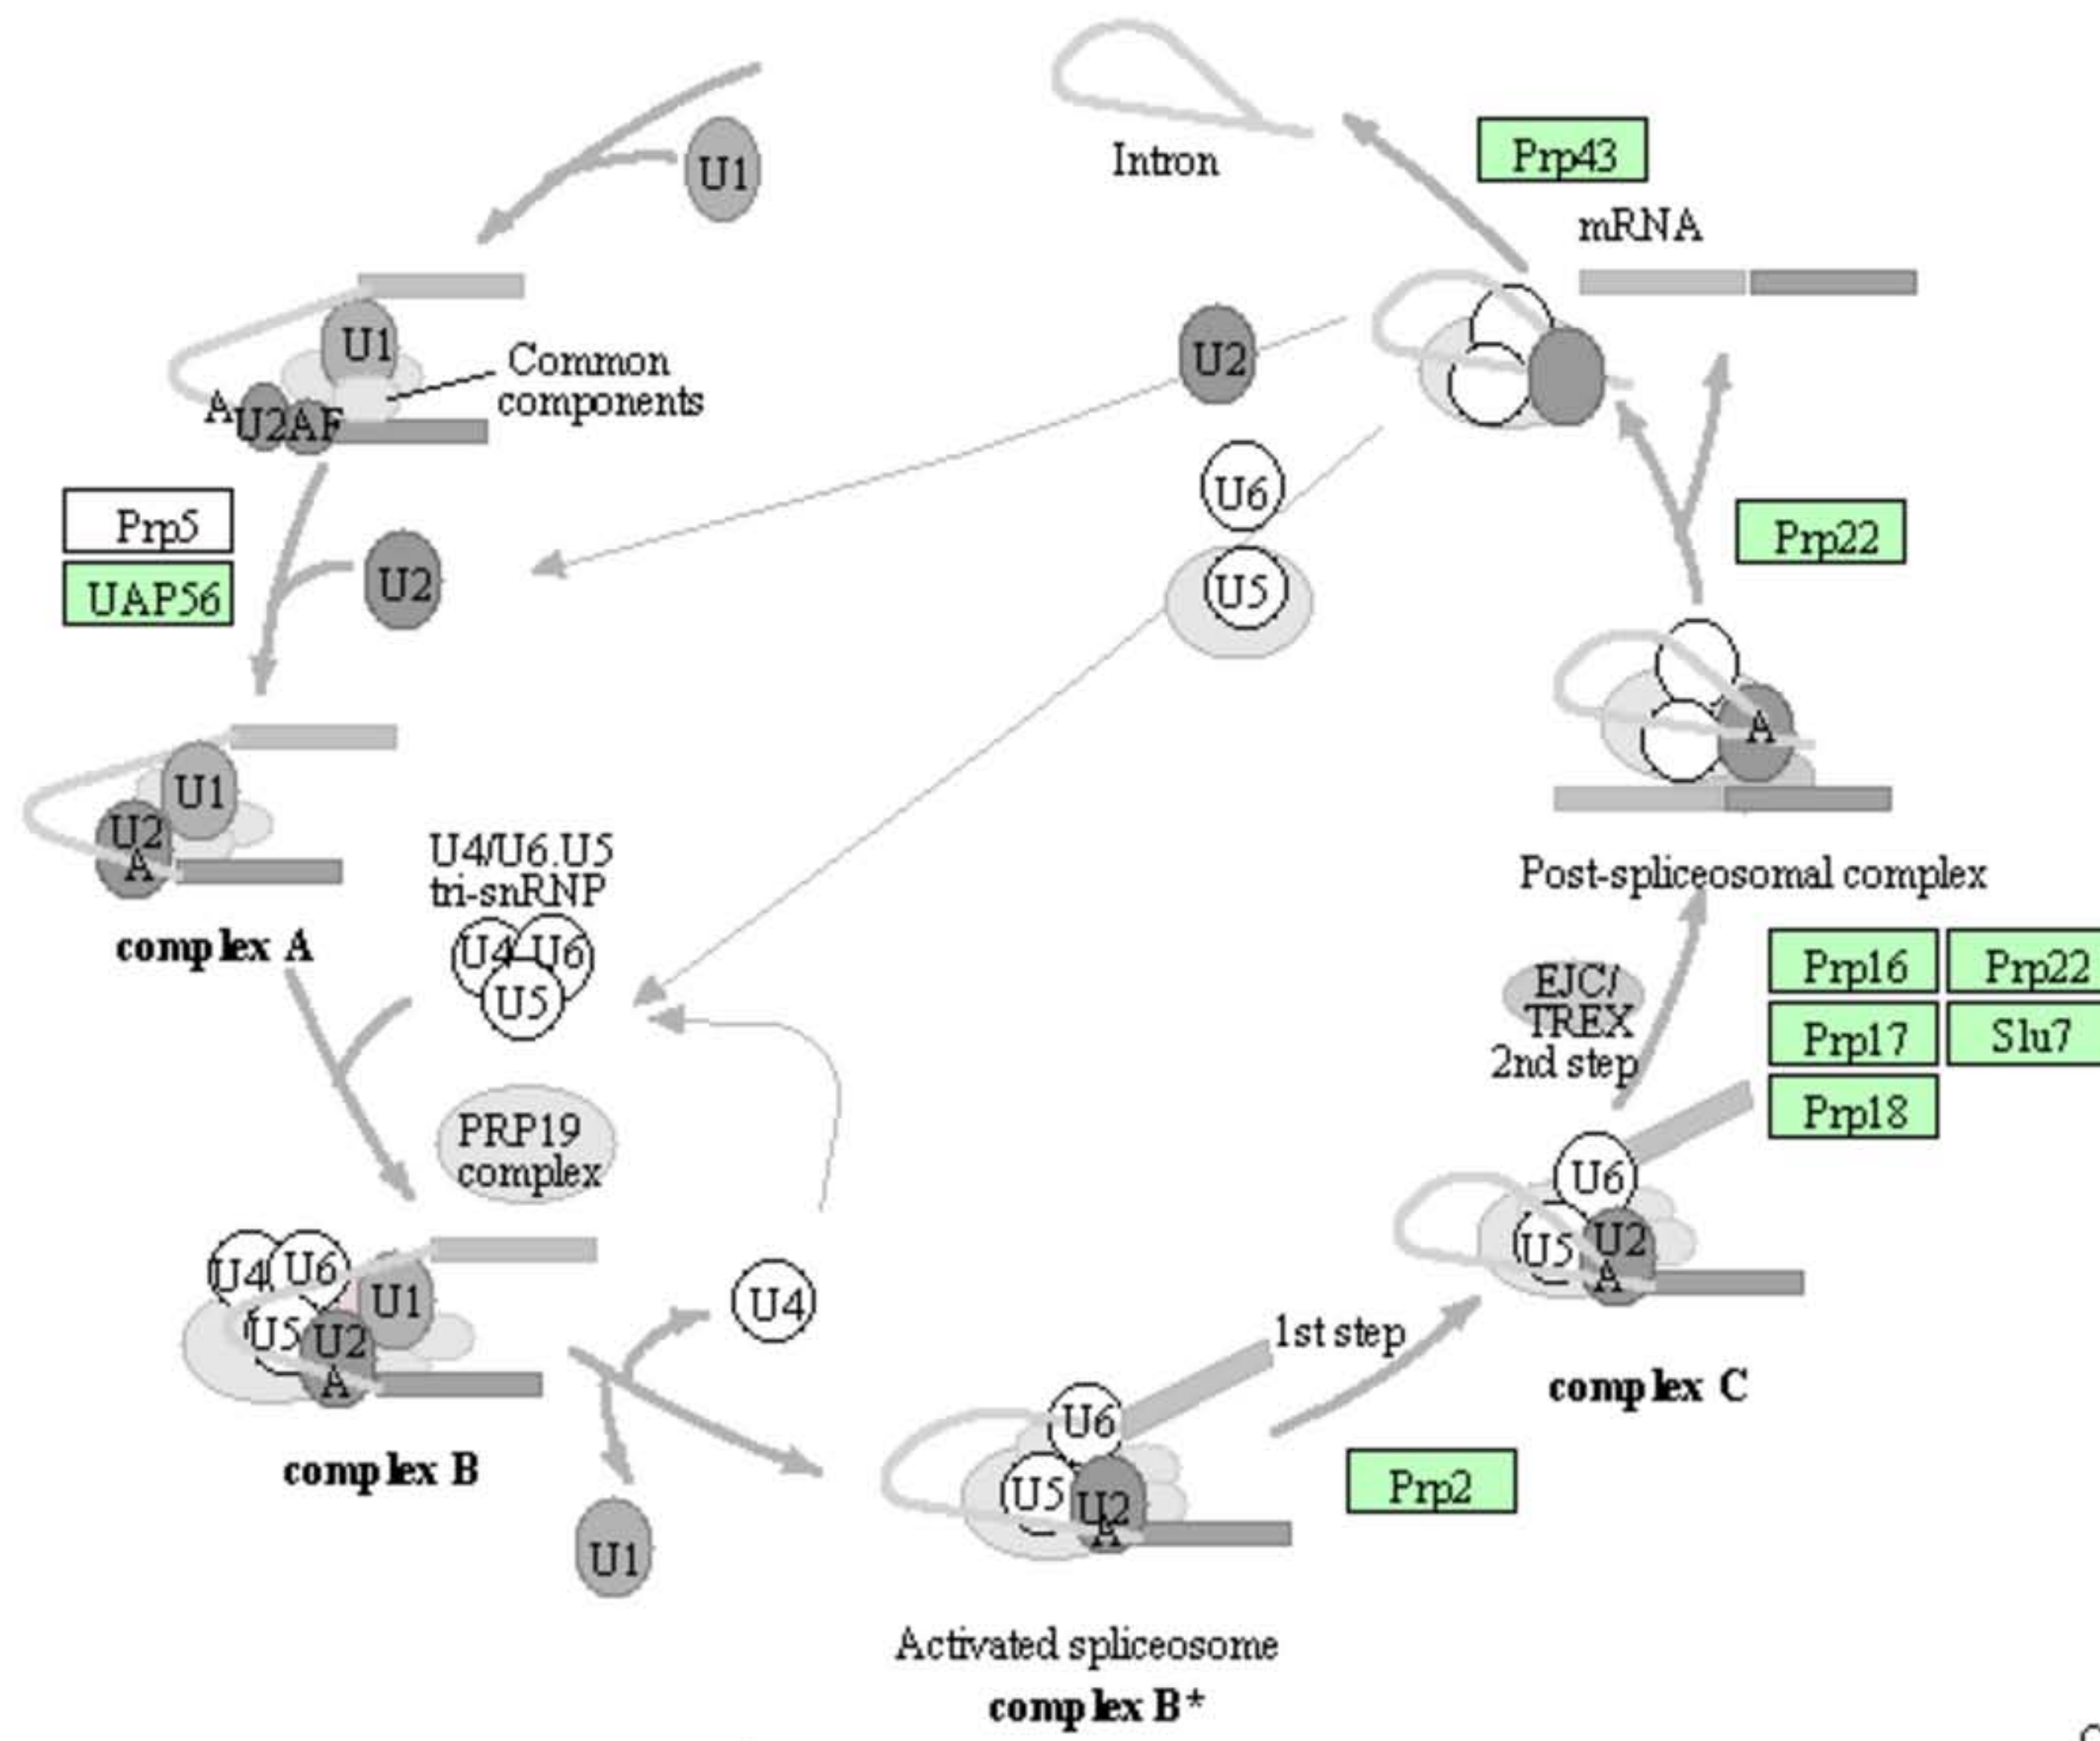

## Spliceosome components

| U1                 | U2            | U4/U6                         | U5                |
|--------------------|---------------|-------------------------------|-------------------|
| U1snRNA            | U2snRNA       | U4snRNA                       | U5snRNA           |
| Sm                 | Sm            | U6snRNA                       | Sm                |
| U1-70K             | U2A'          | Lsm                           | Snul14            |
| U1A                | U2B''         | Sm                            | Brr2              |
| U1C                | SF3a          | Prp3                          | Prp6              |
| U1 related         | SF3b          | Prp4                          | Prp8              |
| FBP11              | U2 related    | CypH                          | Prp8BP            |
| S164               | U2AF          | Prp31                         | Prp28             |
| p68                | PUF60         | Snul3                         | DIB1              |
| CA150              | SPF30         | U4/U6.U5 tri-snRNP associated |                   |
|                    | SPF45         | SnRNP27                       |                   |
|                    | CHERP         | Sad1                          |                   |
|                    | SR140         | Snu66                         |                   |
|                    | Prp43         | Snu23                         |                   |
|                    |               | Prp38                         |                   |
| Prp19 complex      | Prp19 related | EJC/TREX                      | Common components |
| Prp19              | SKIP          | ACINUS                        | CBP80/20          |
| CDC5               | Syf           | eIFA3                         | hnRNPs            |
| SPF27              | Isyl          | Y14                           | SR                |
| PRL1               | PPIL1         | magoh                         |                   |
| AD002              | CypE          | UAP56                         |                   |
| CTNBL1             |               | THOC                          |                   |
| HSP73              | CCDC12        |                               |                   |
| Complex B specific | RBM22         |                               |                   |
| NPW38              | G10           |                               |                   |
| NPW38F             | AQR           |                               |                   |



# STARCH AND SUCROSE METABOLISM

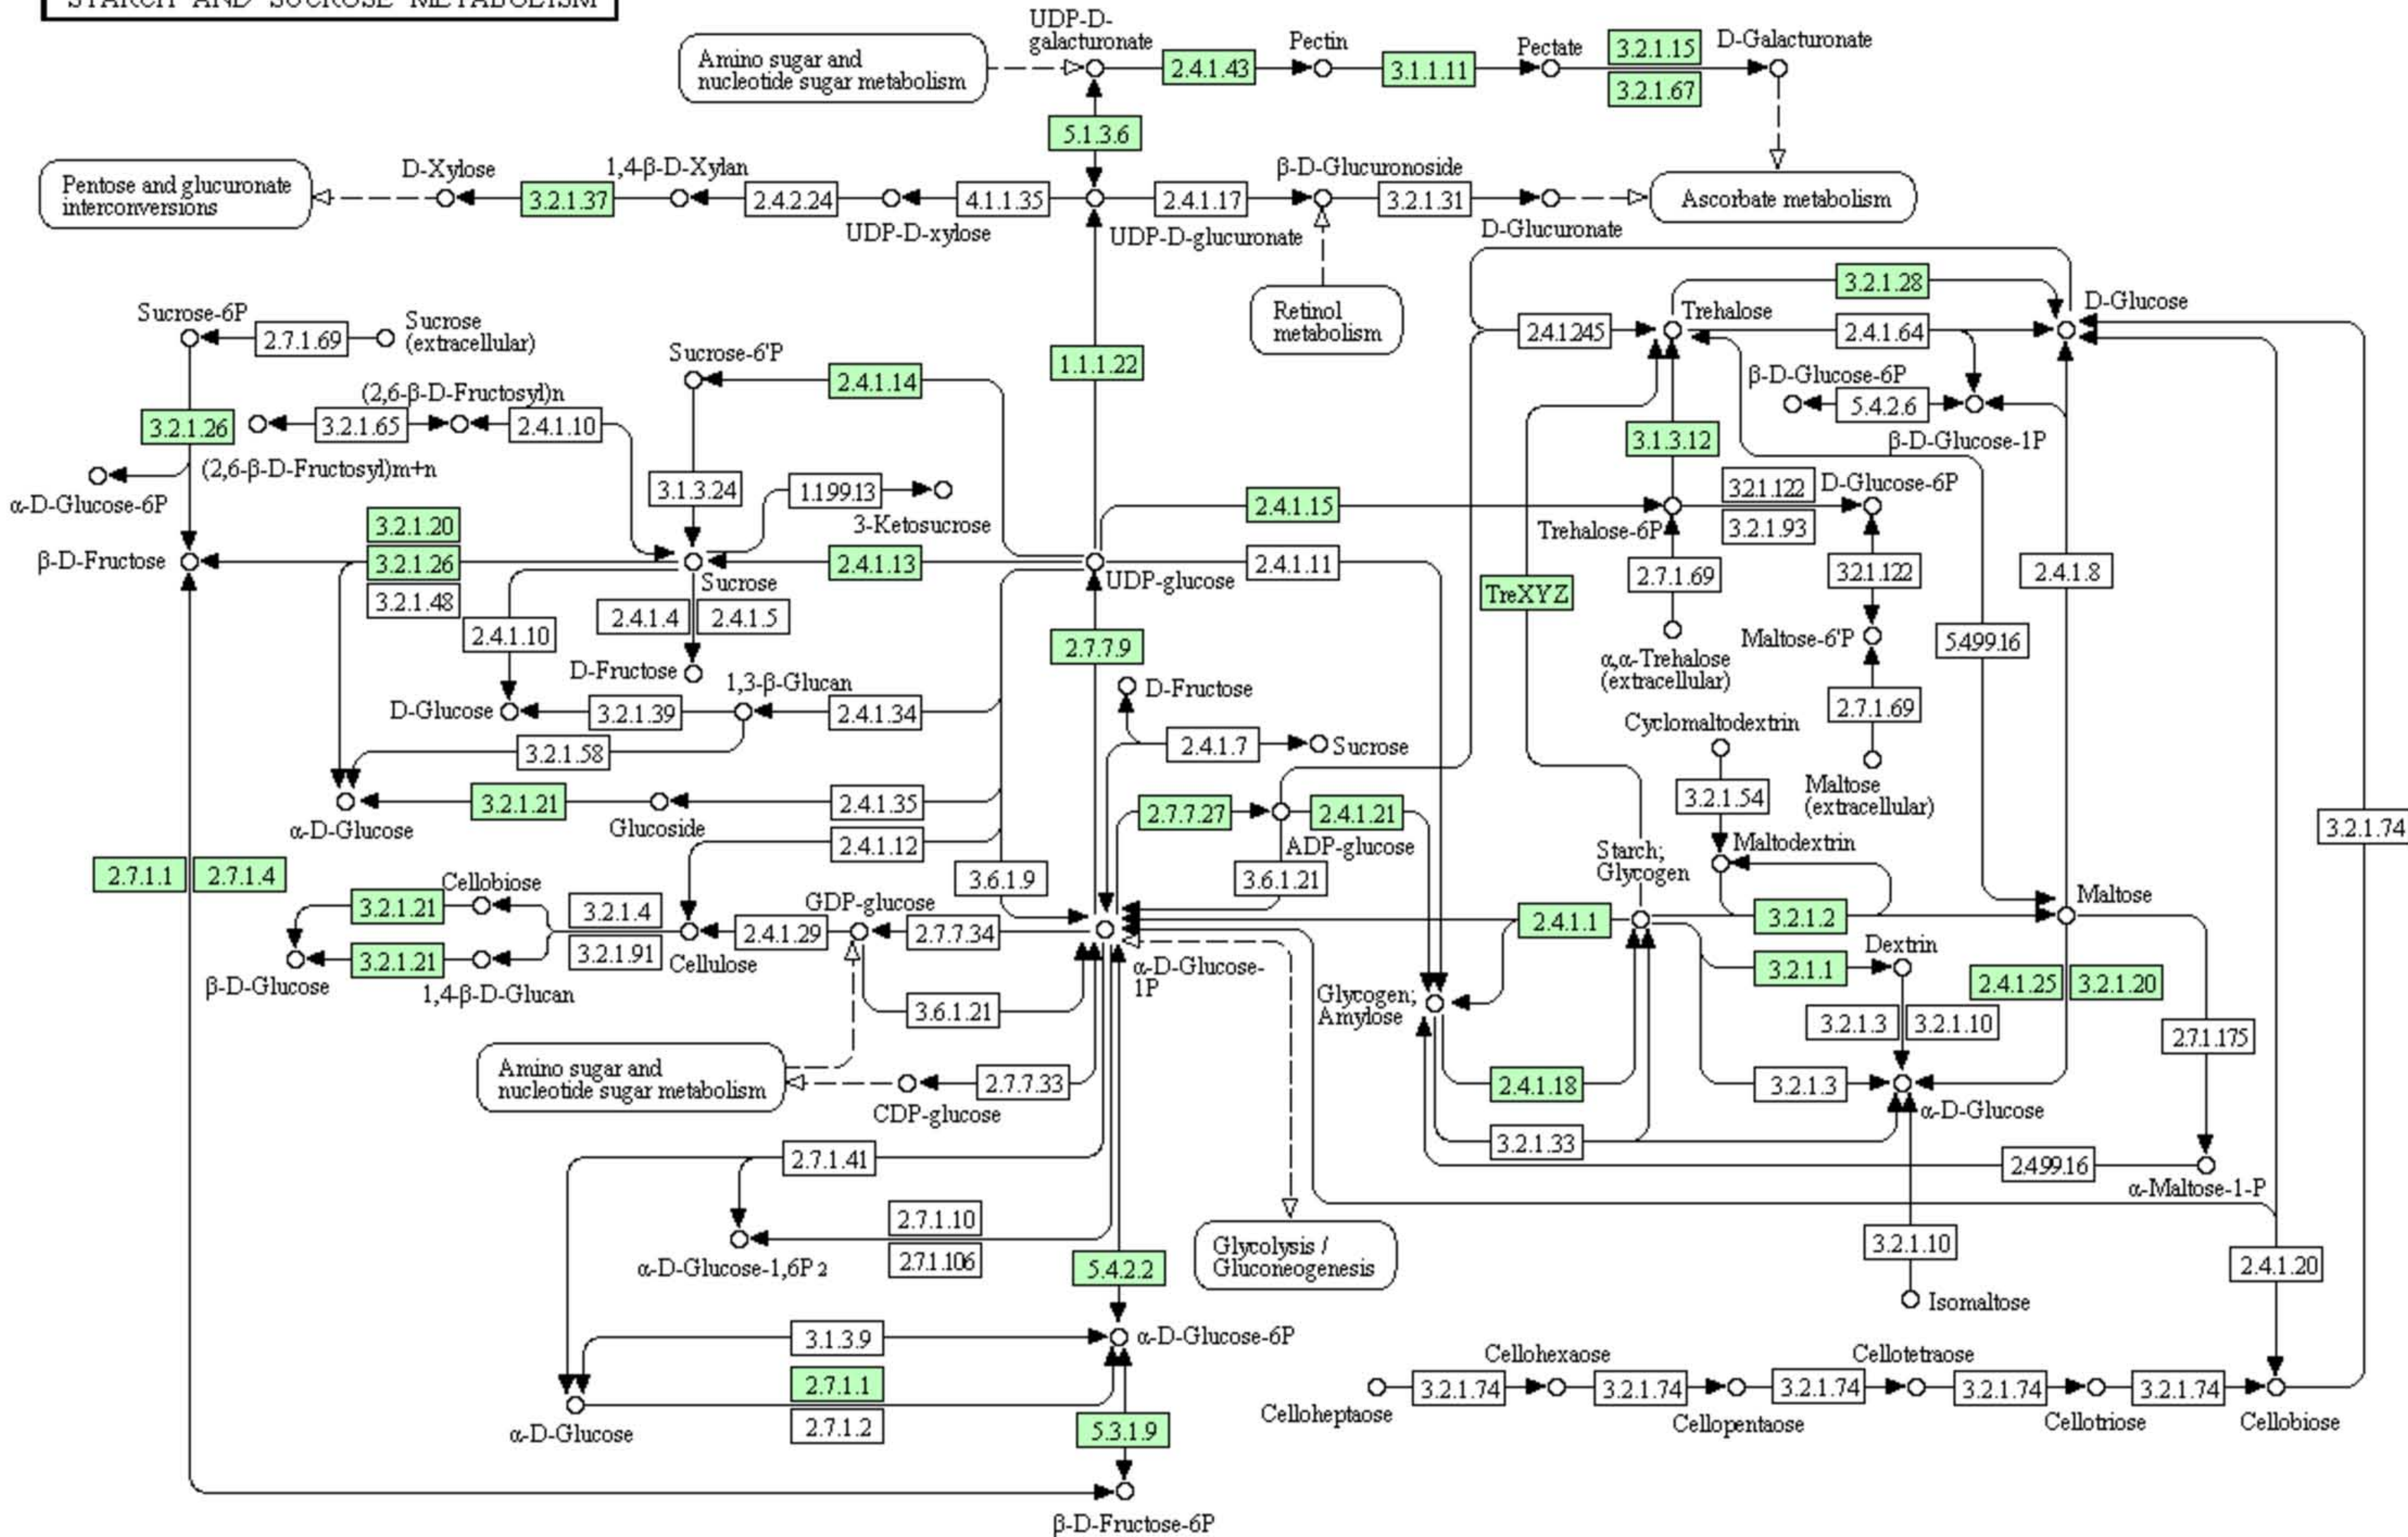



# STEROID BIOSYNTHESIS

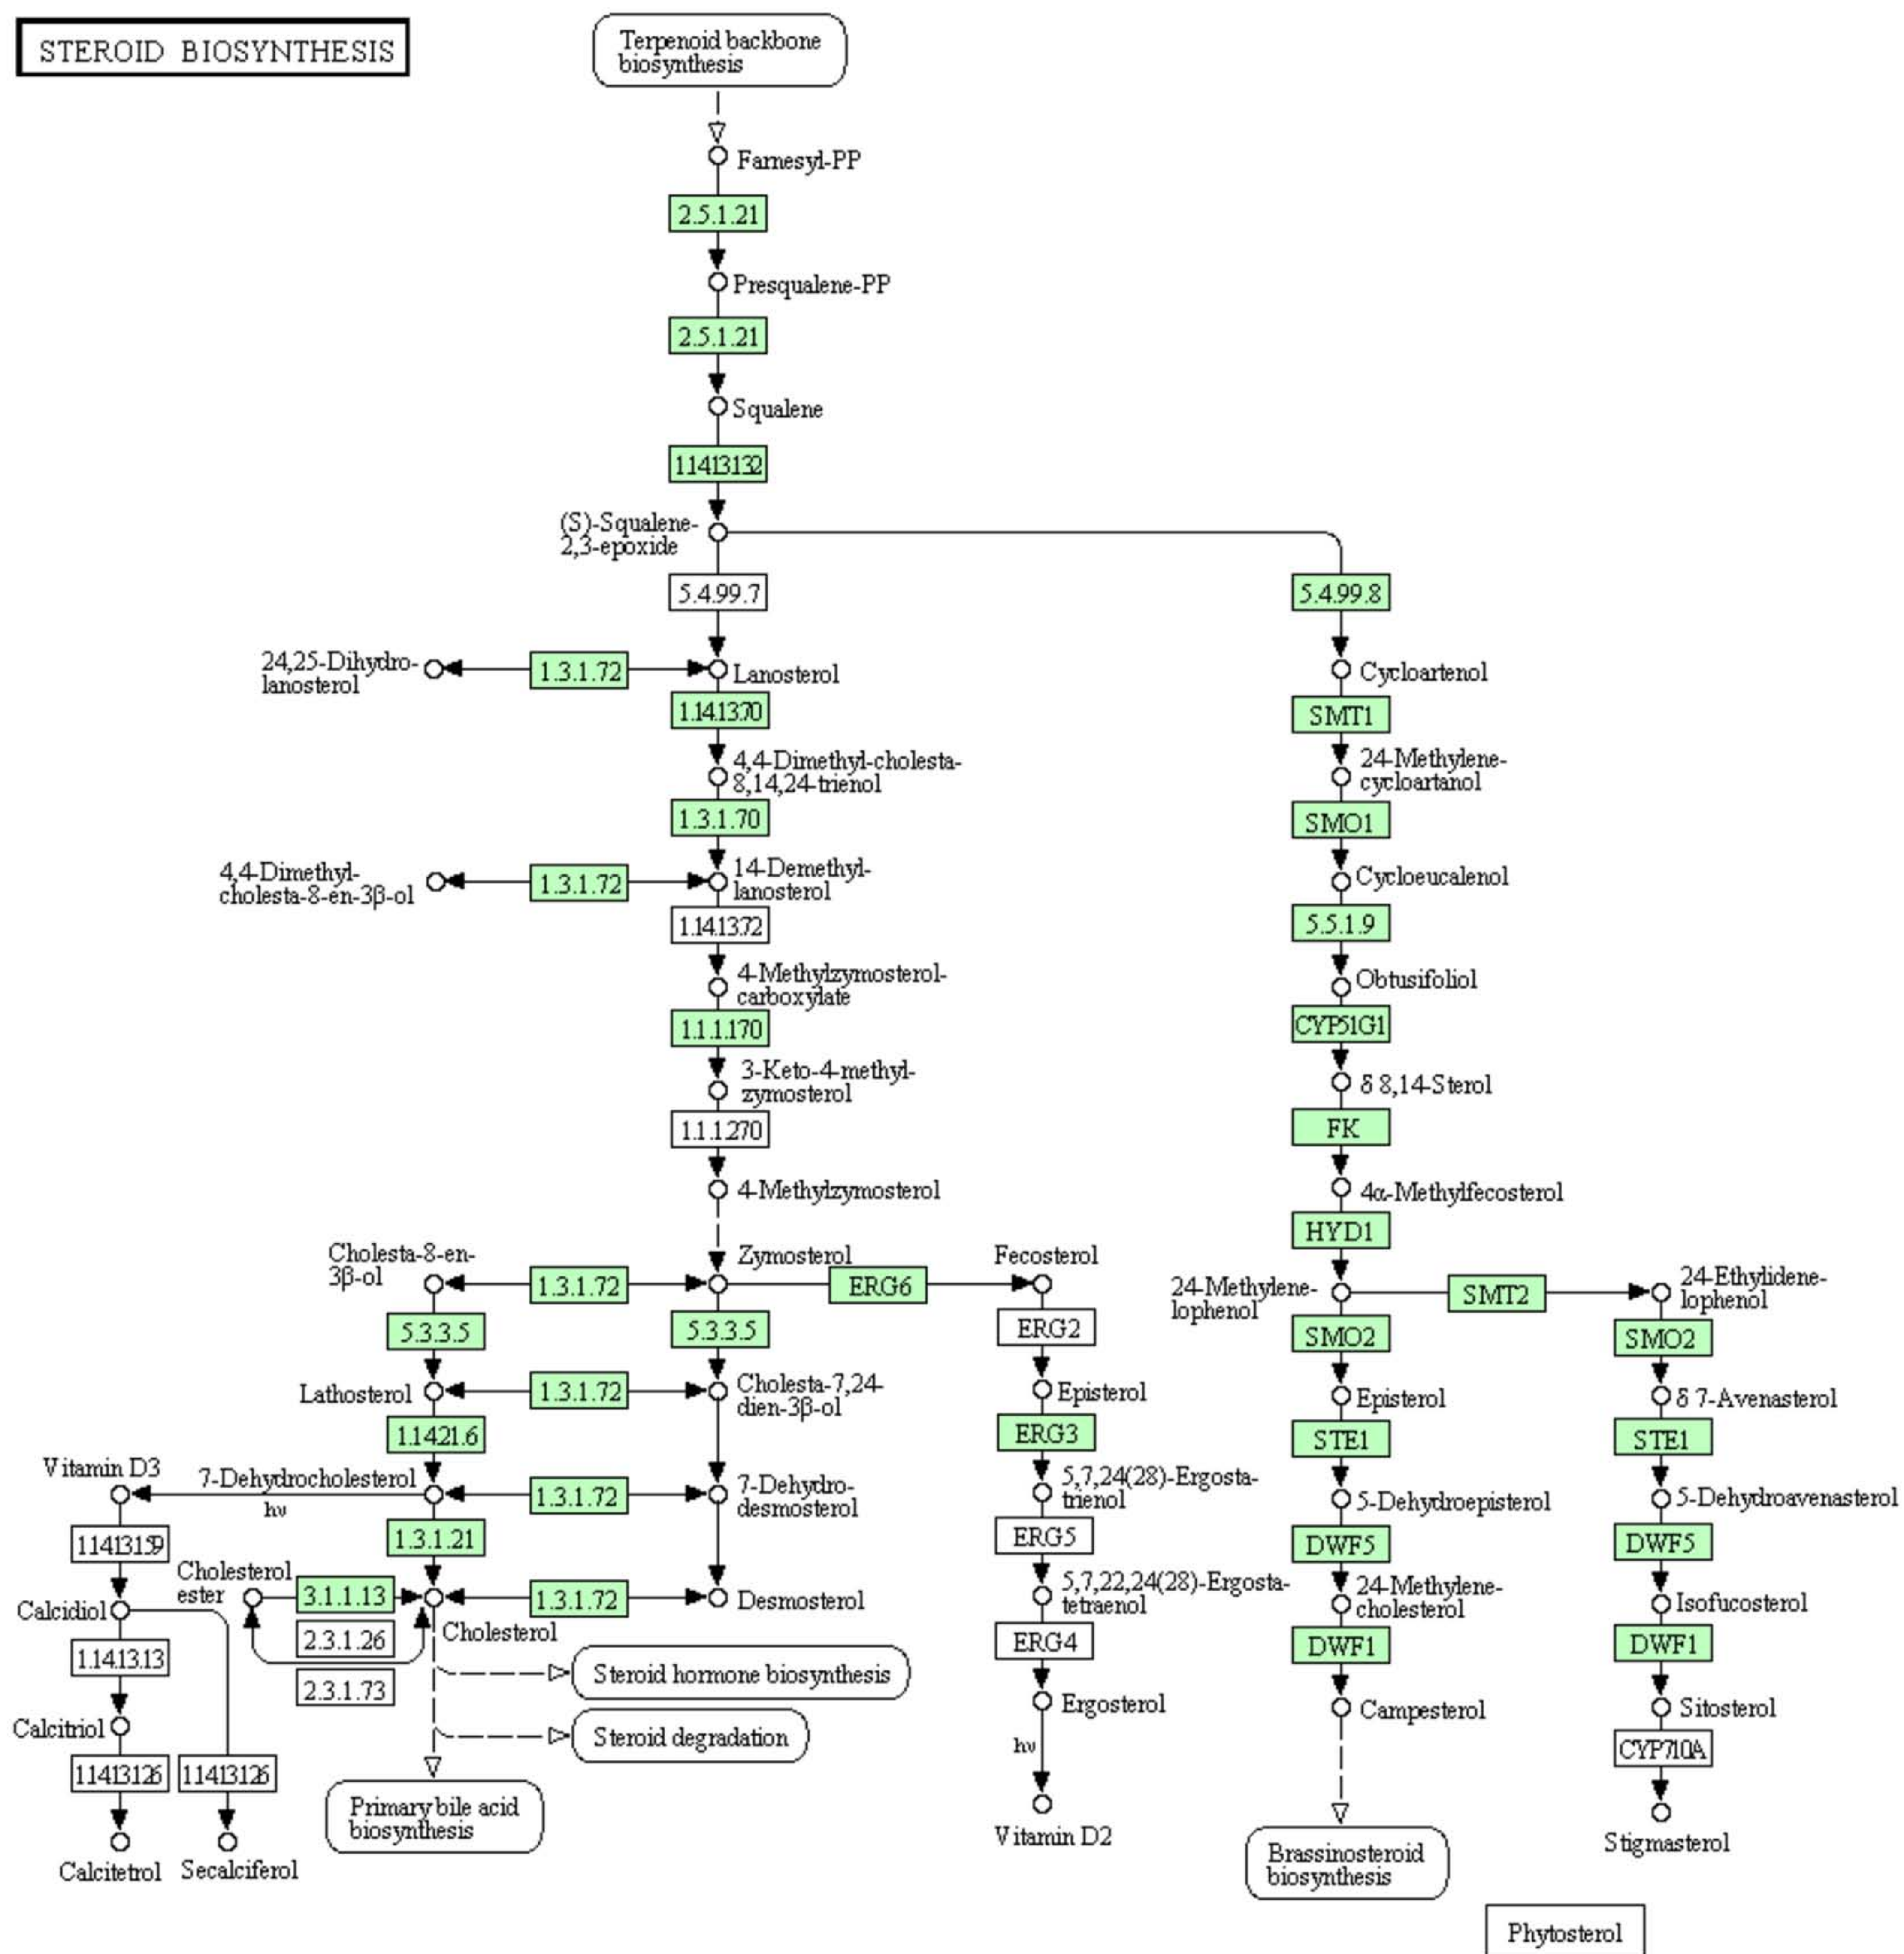







# STILBENOID, DIARYLHEPTANOID AND GINGEROL BIOSYNTHESIS

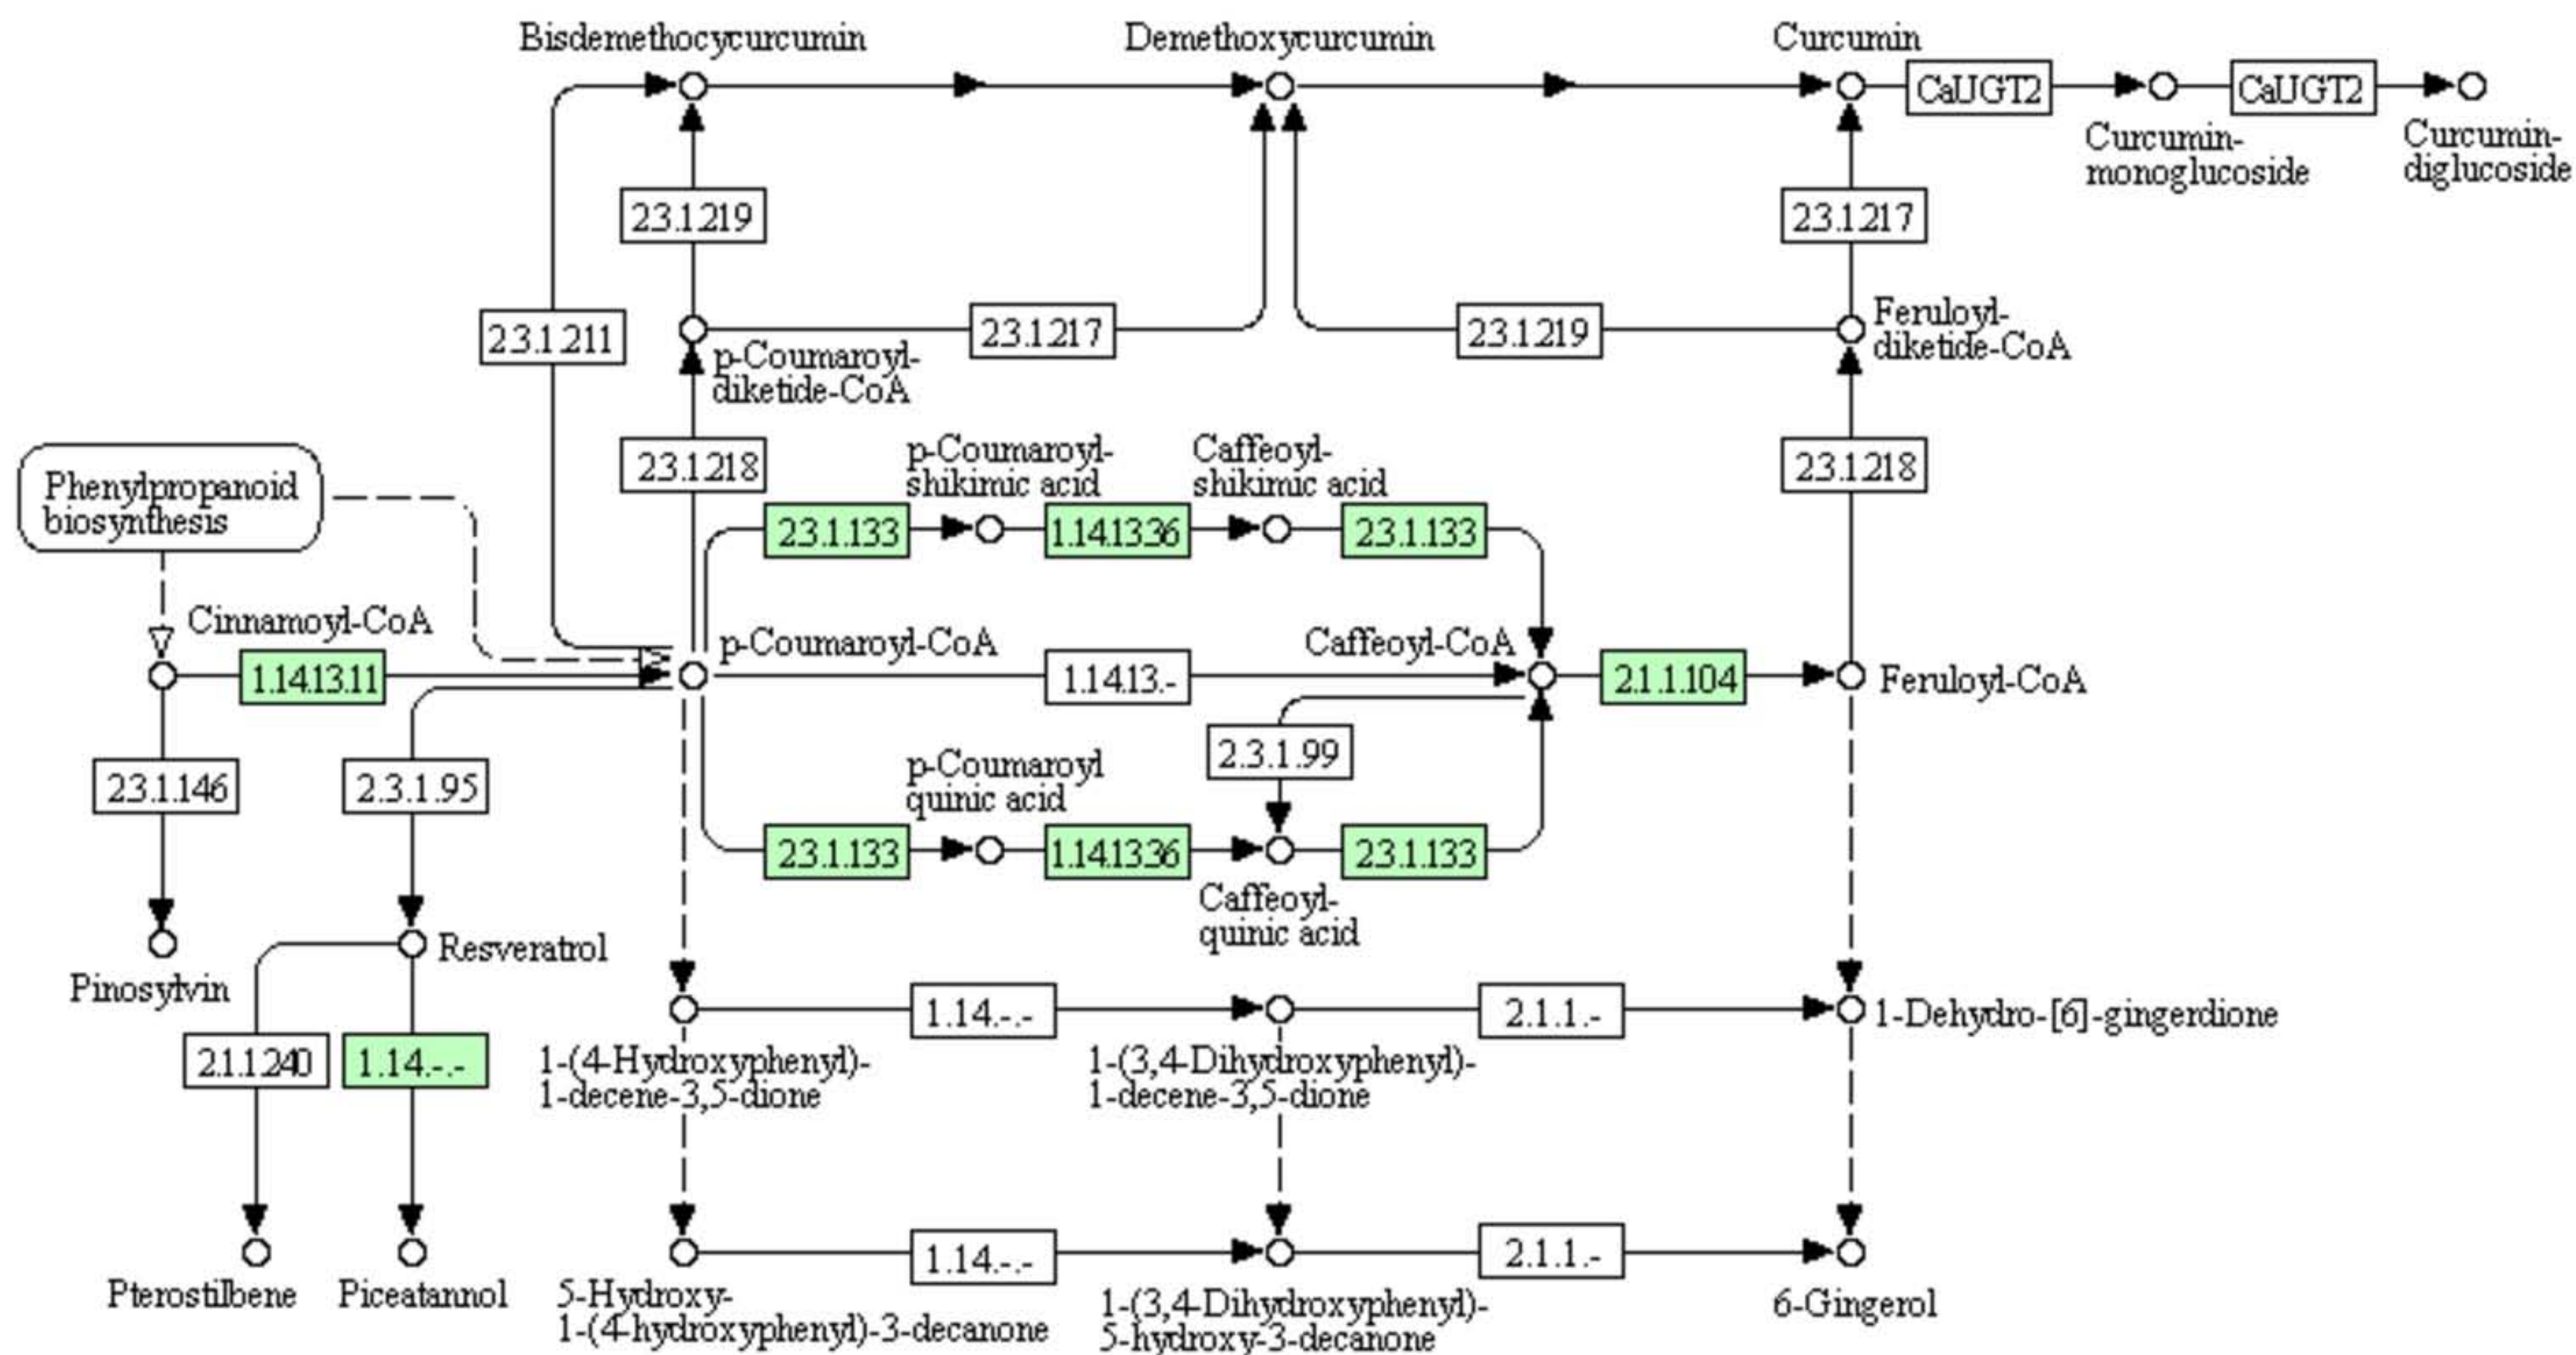



# SULFUR METABOLISM

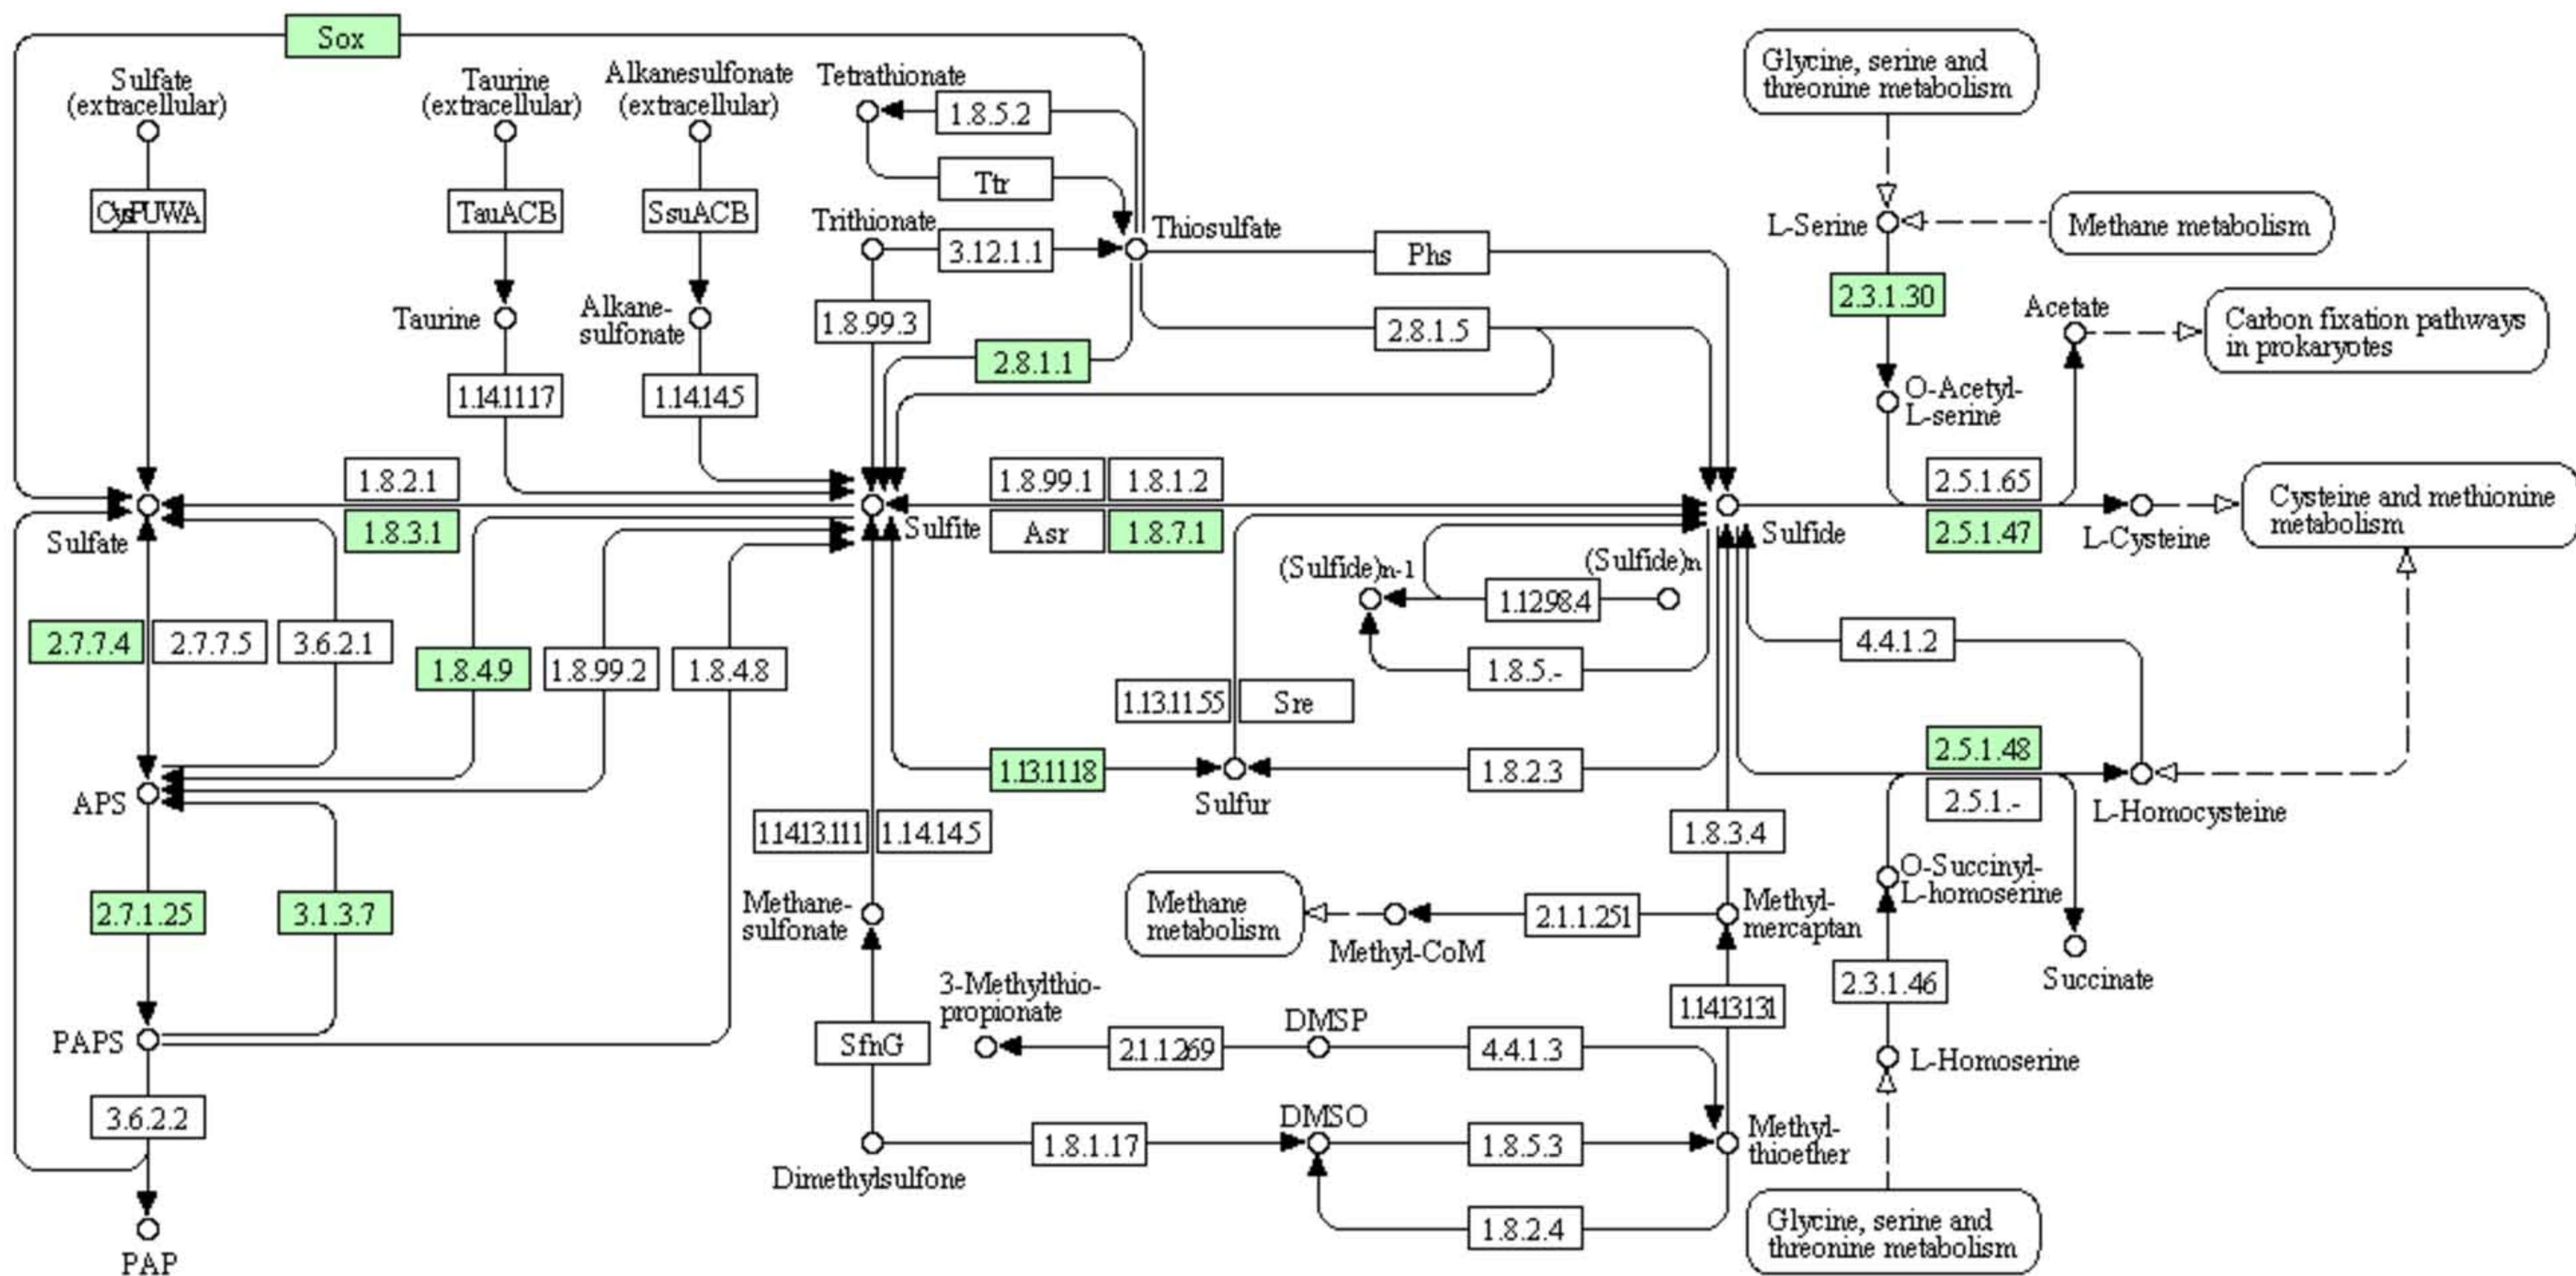

Oxidation state +6

+4

+2

-2

## Assimilatory sulfate reduction

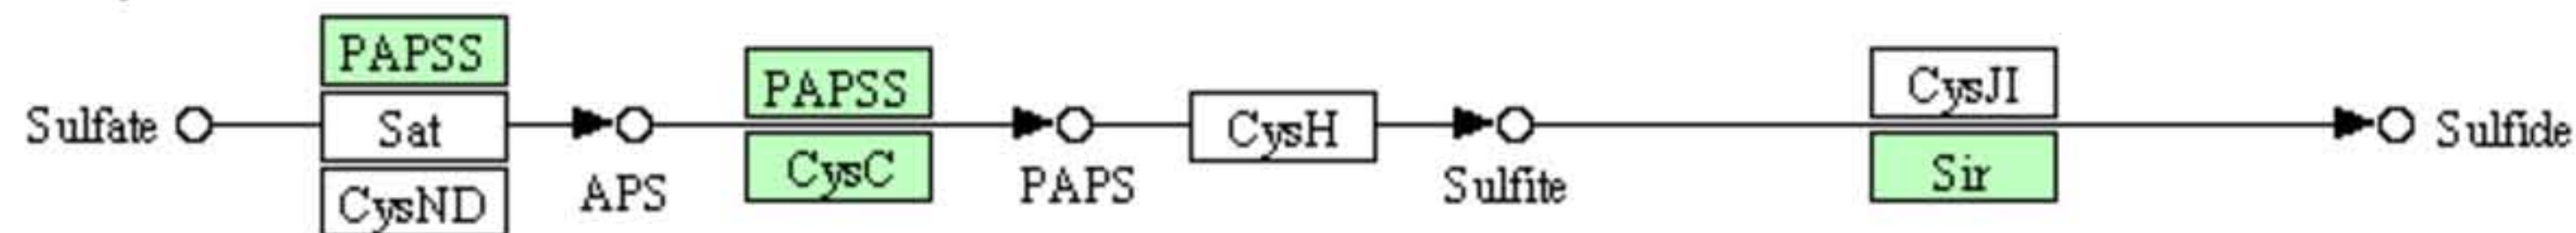

## Dissimilatory sulfate reduction and oxidation

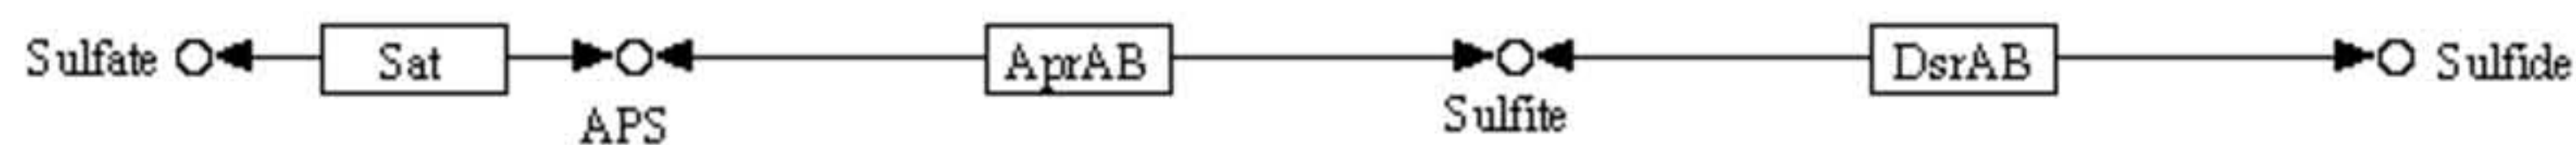

## SOX system

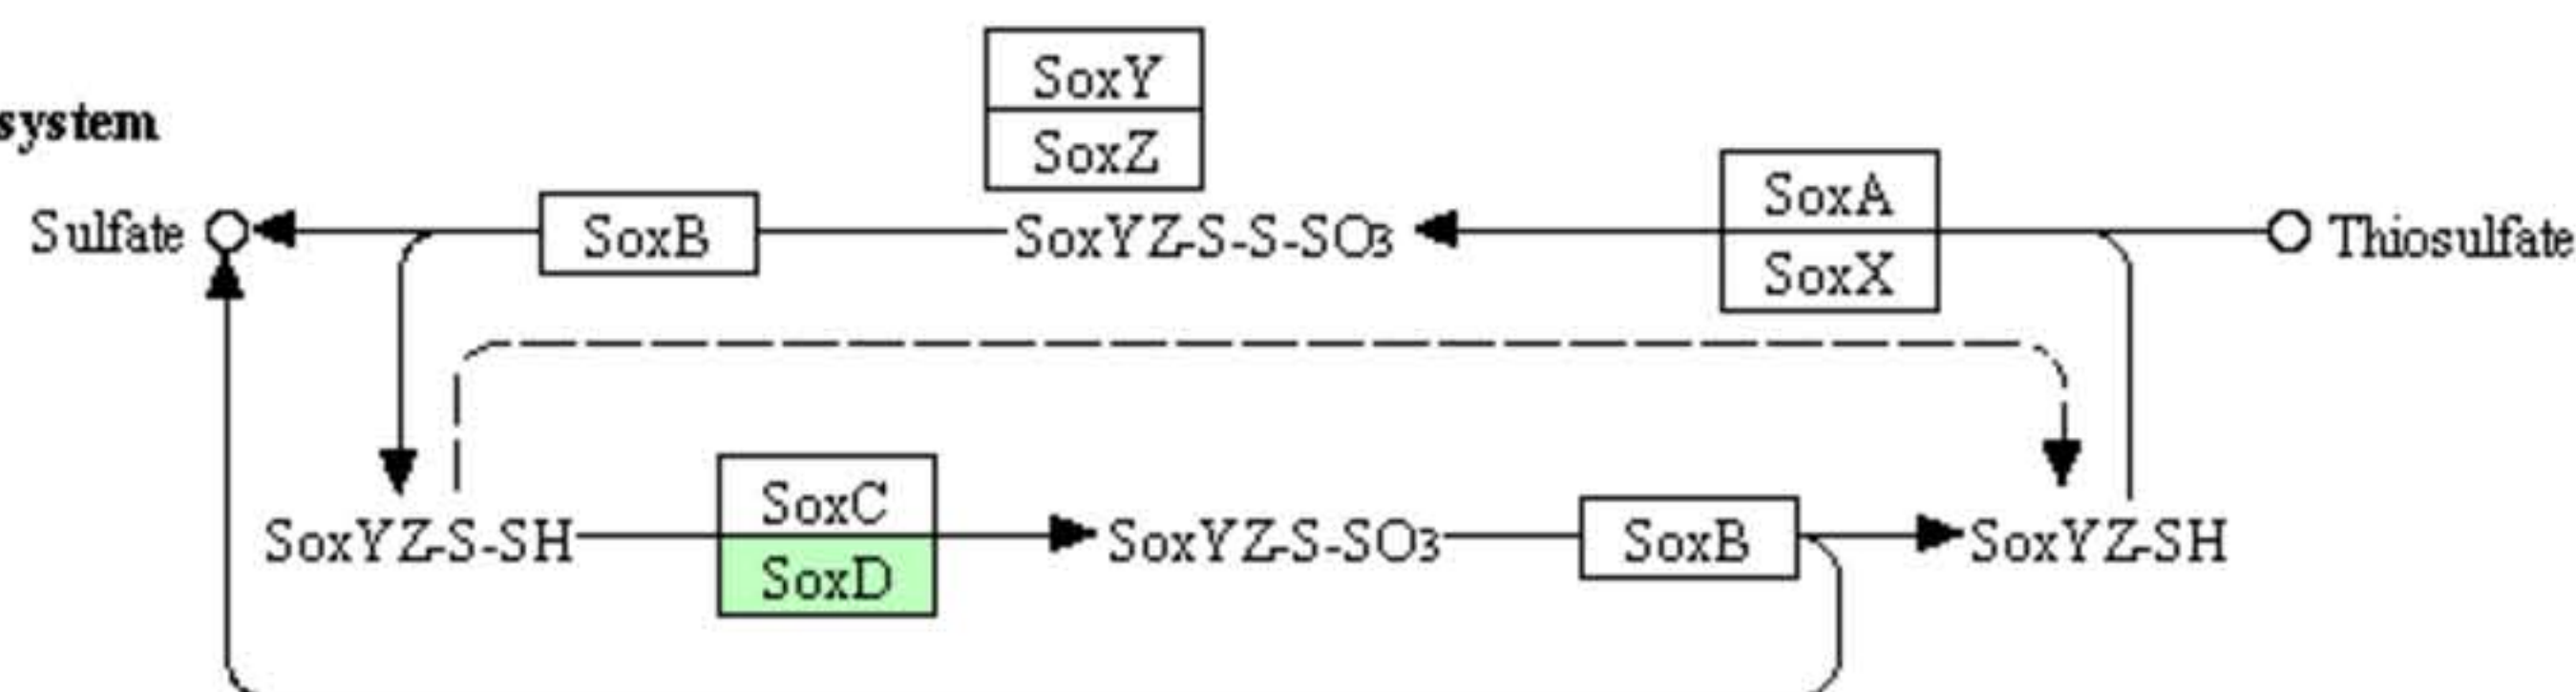



# SULFUR RELAY SYSTEM

## Ubiquitin pathway

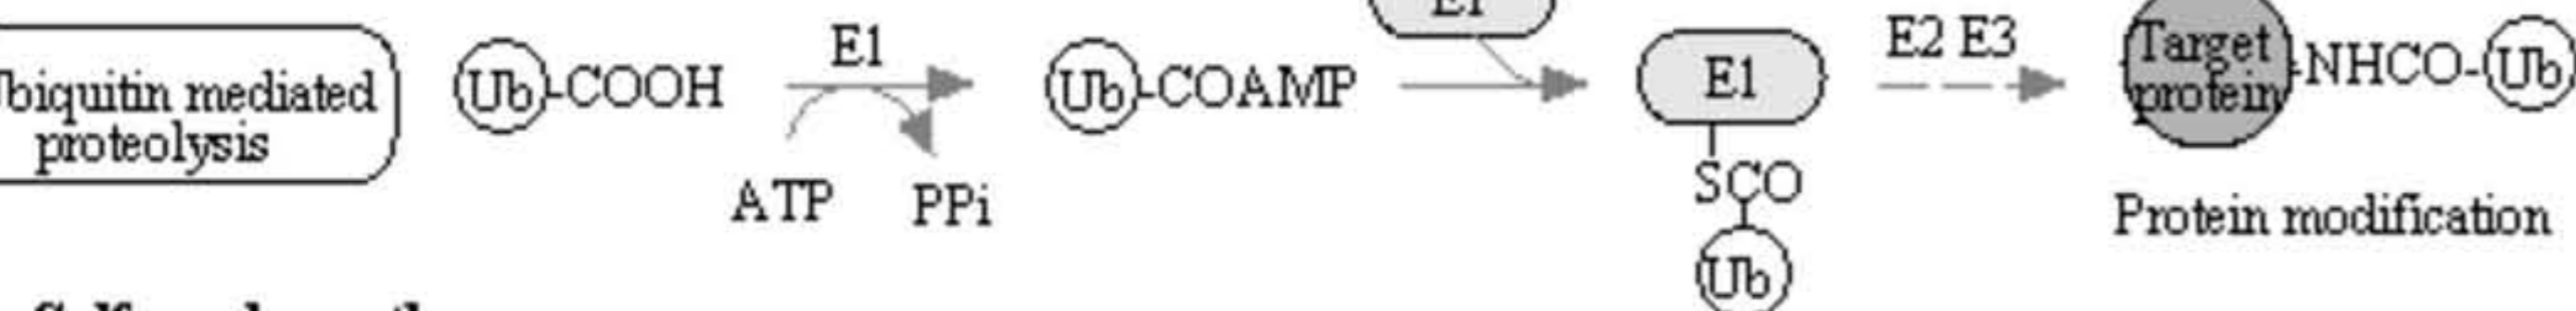

## Sulfur-relay pathway

### 2-thiouridine biosynthesis (*Saccharomyces cerevisiae*)

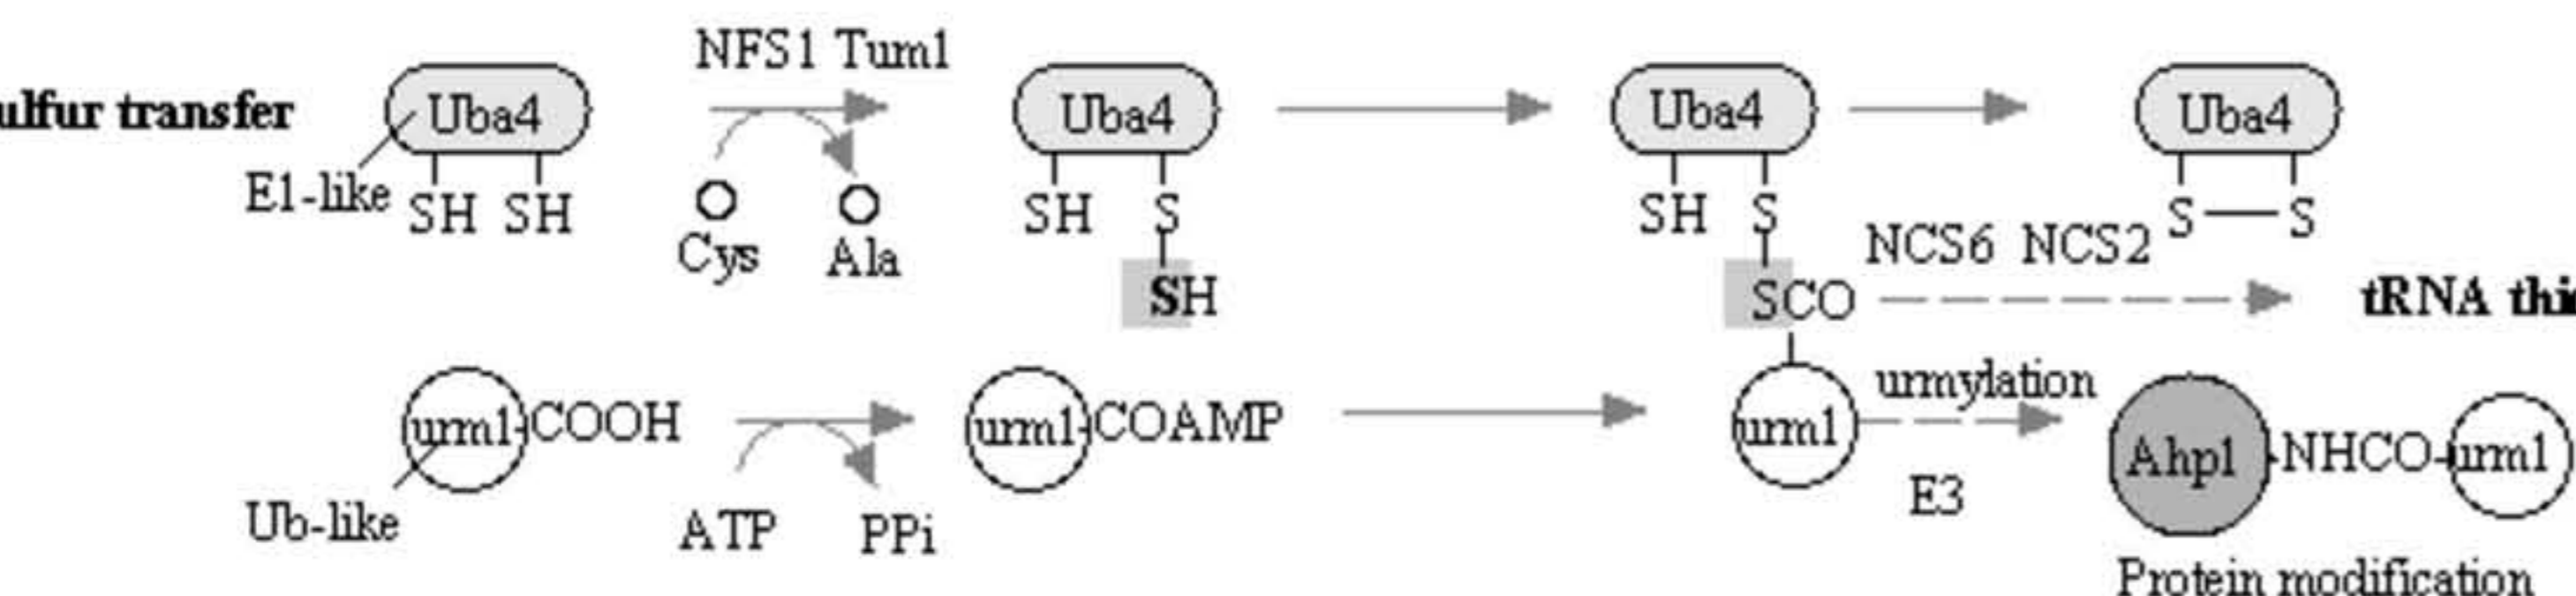

### Molybdenum cofactor (Moco) biosynthesis (Mammals)

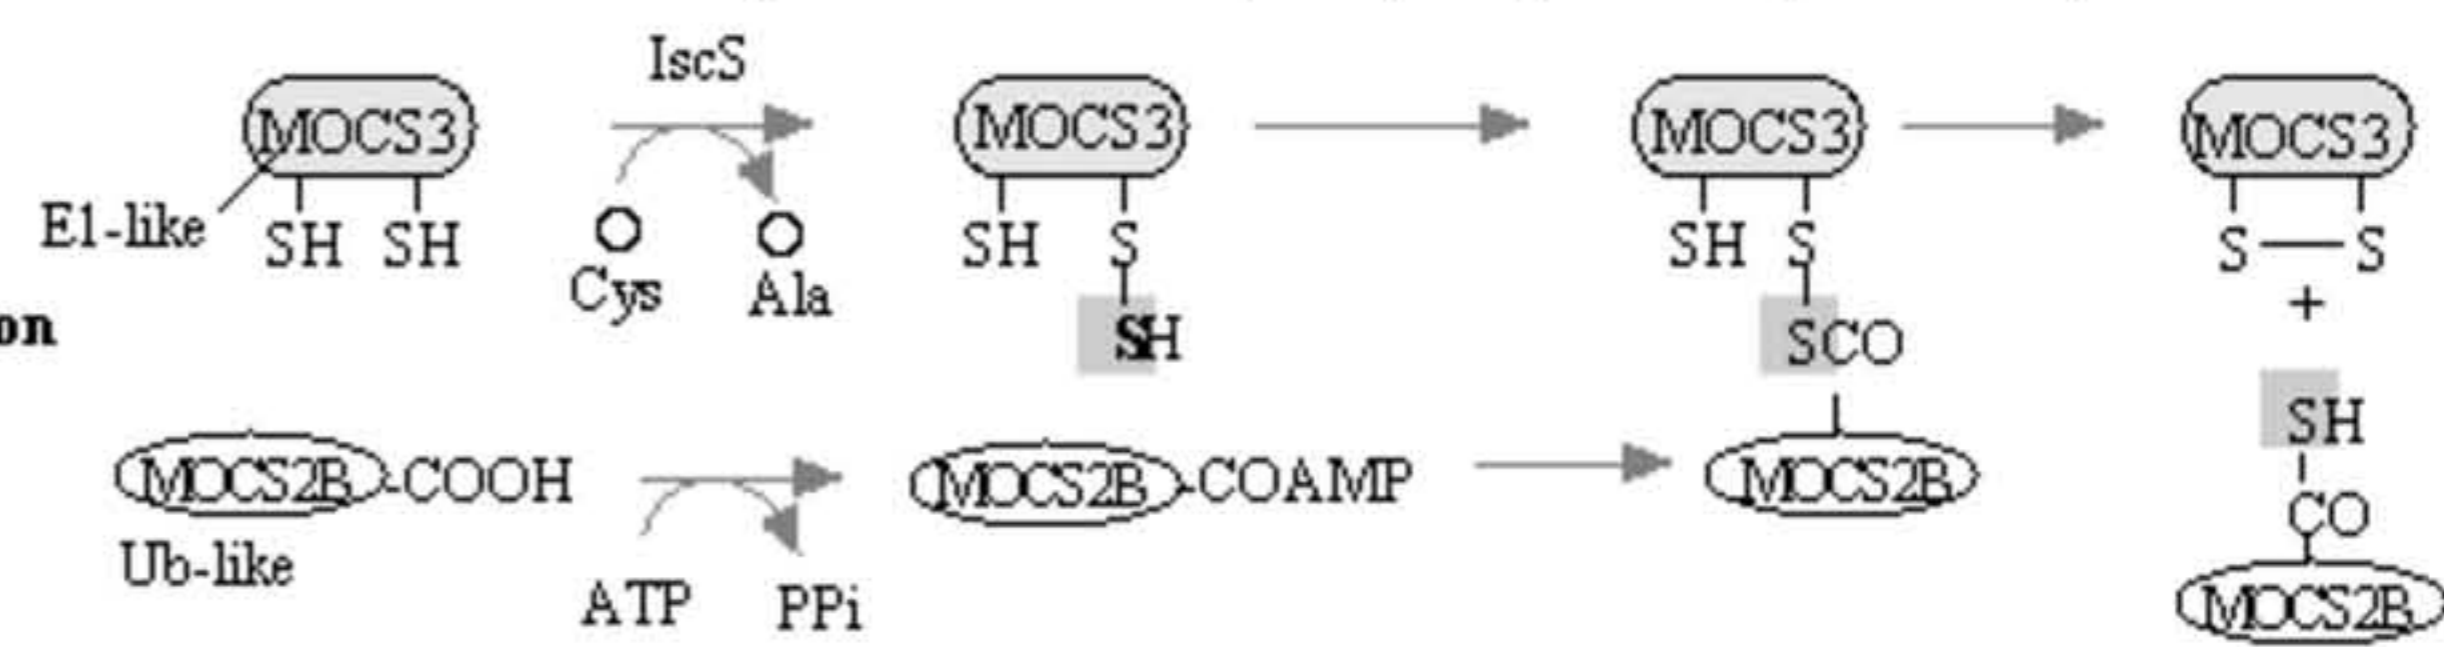

### 2-thiouridine biosynthesis

#### Eukaryote

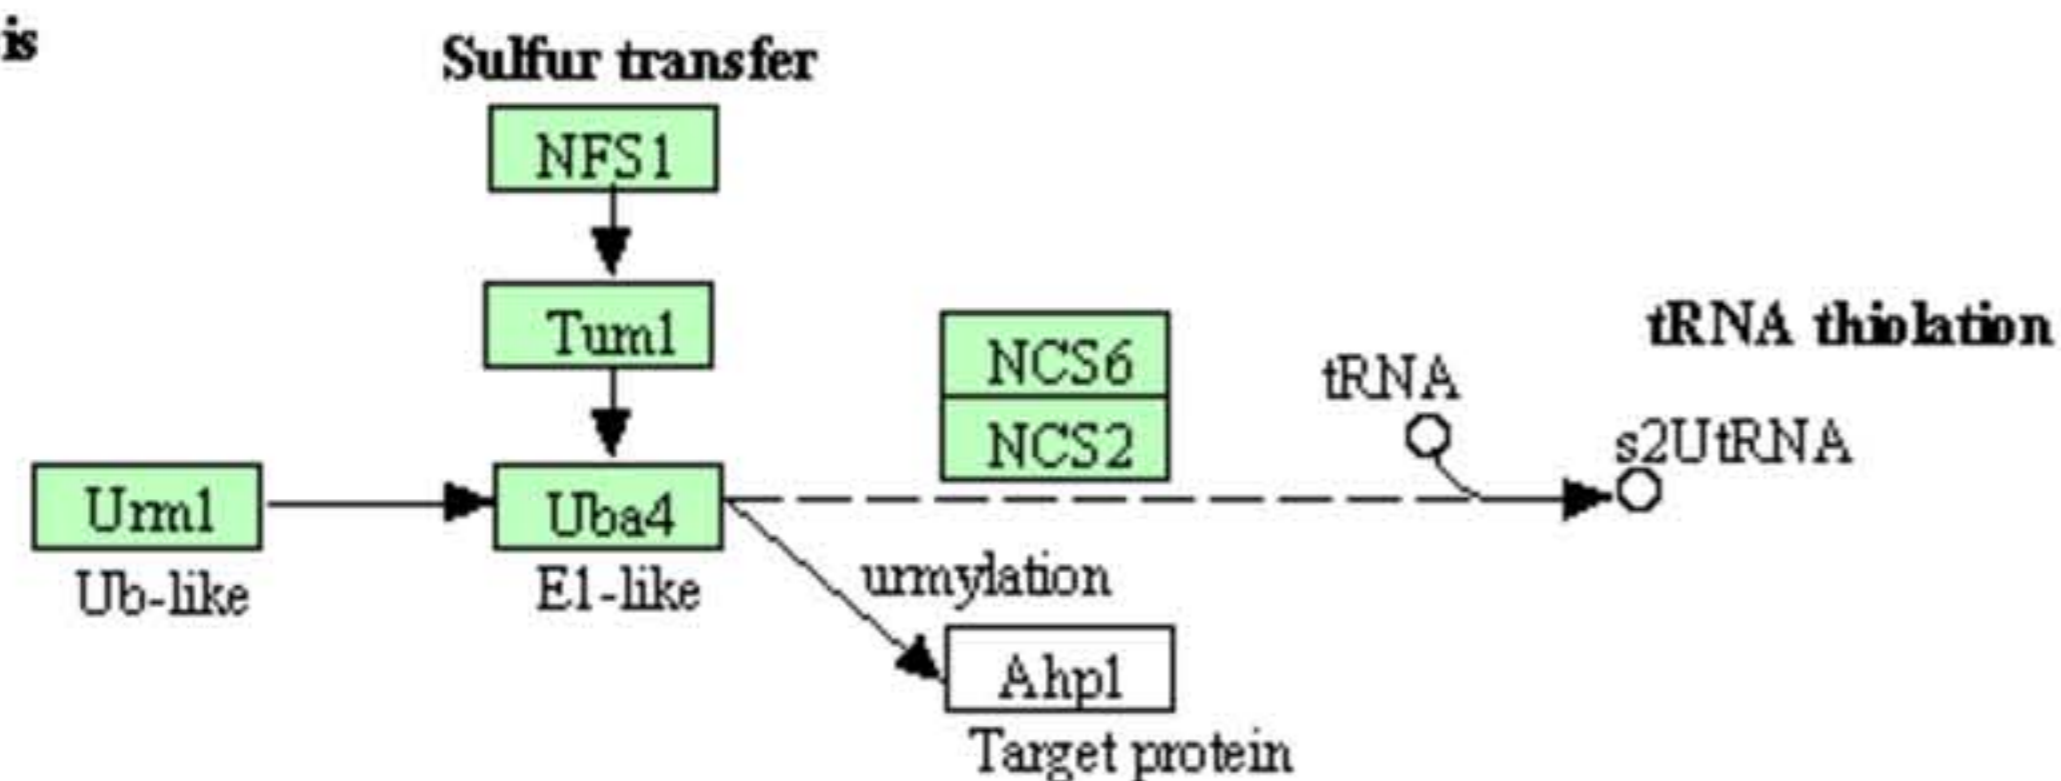

#### Prokaryote

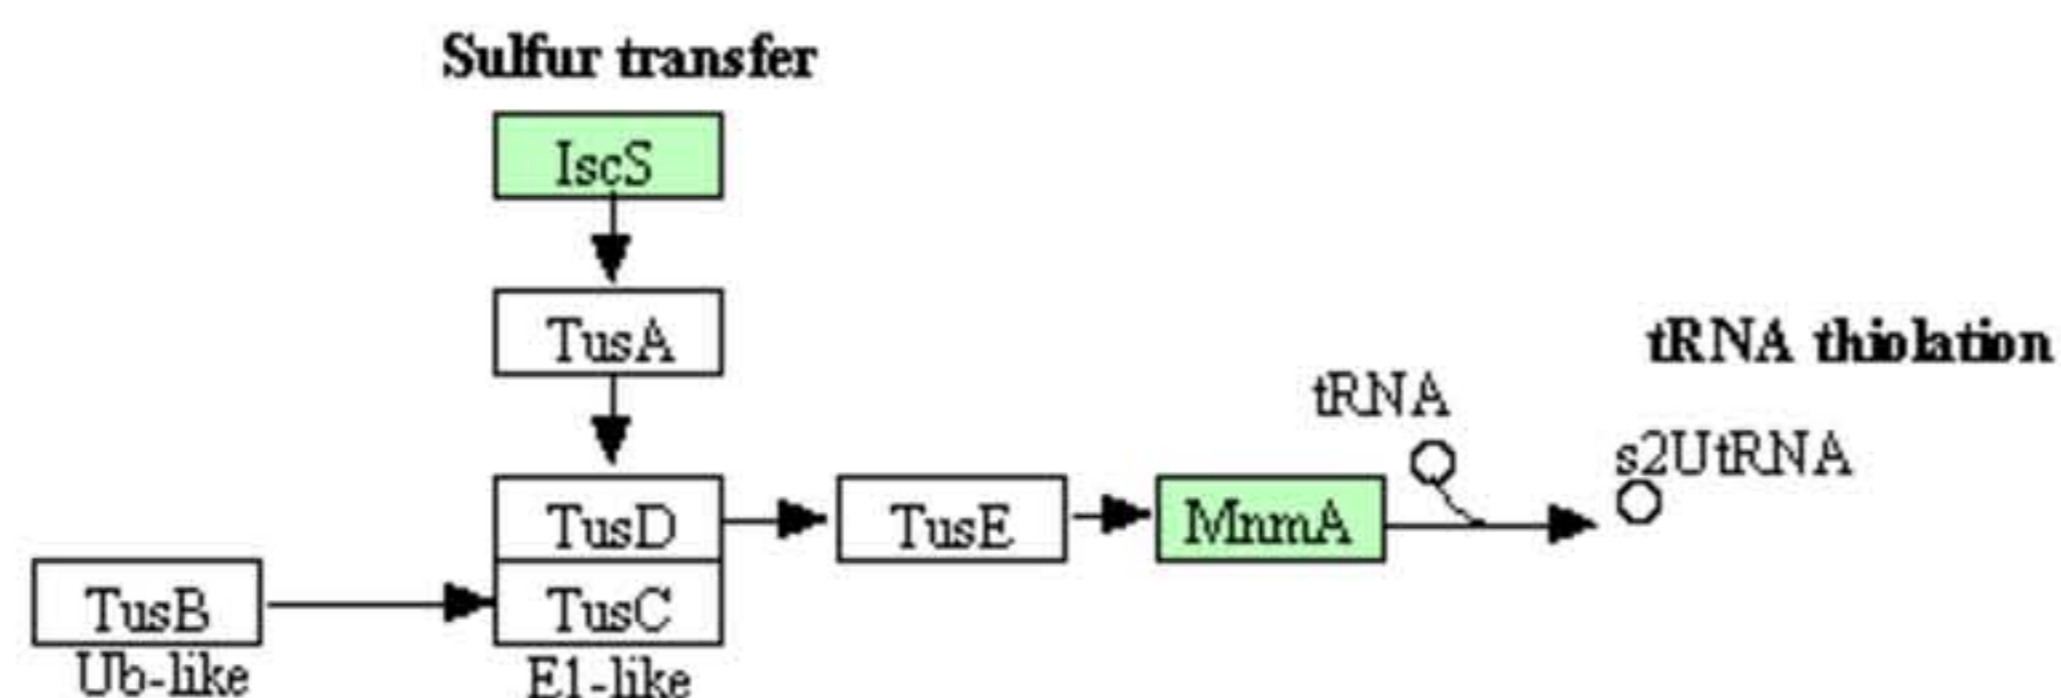

### Moco biosynthesis

#### Eukaryote

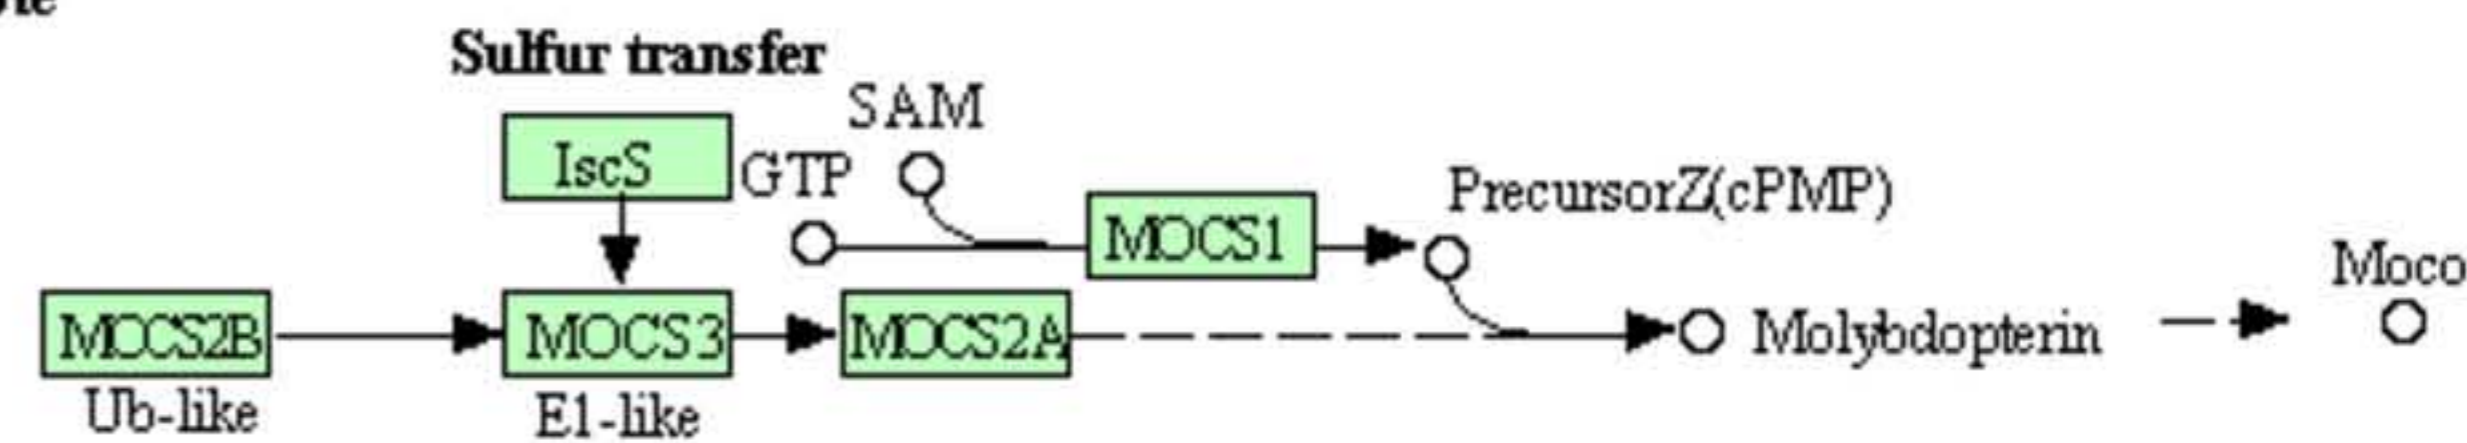

#### Prokaryote

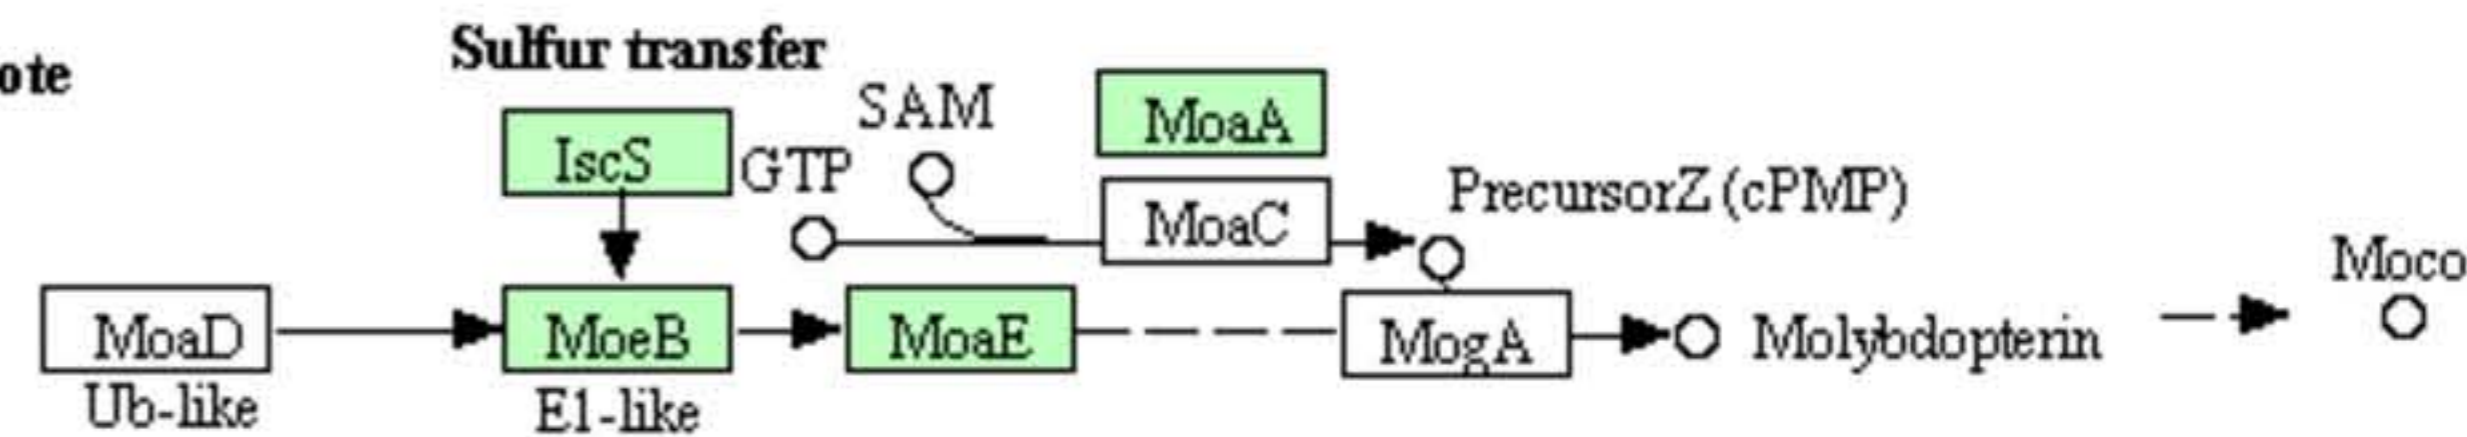

### Thiamin biosynthesis

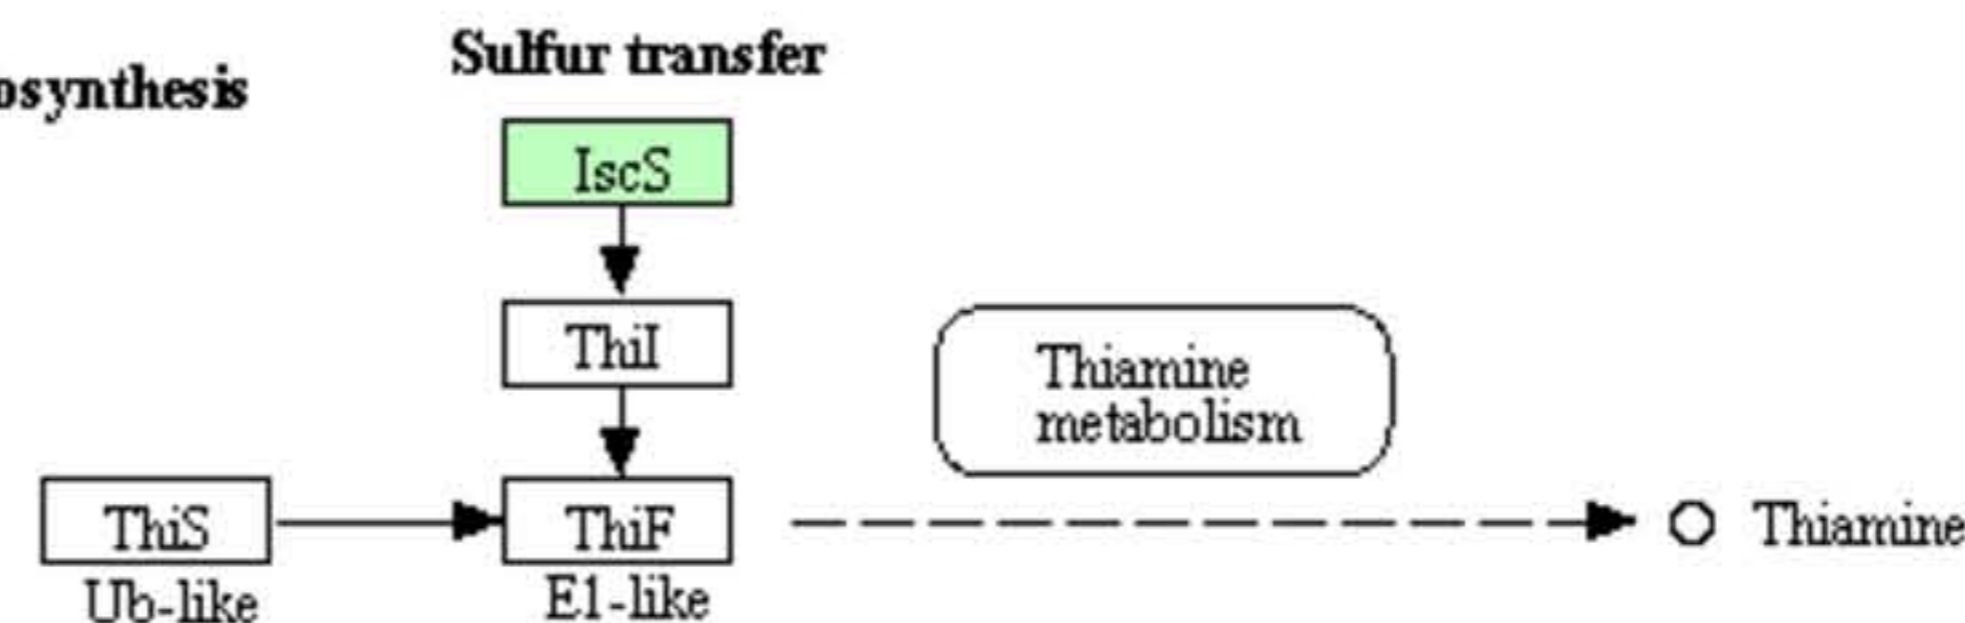



# SYNTHESIS AND DEGRADATION OF KETONE BODIES

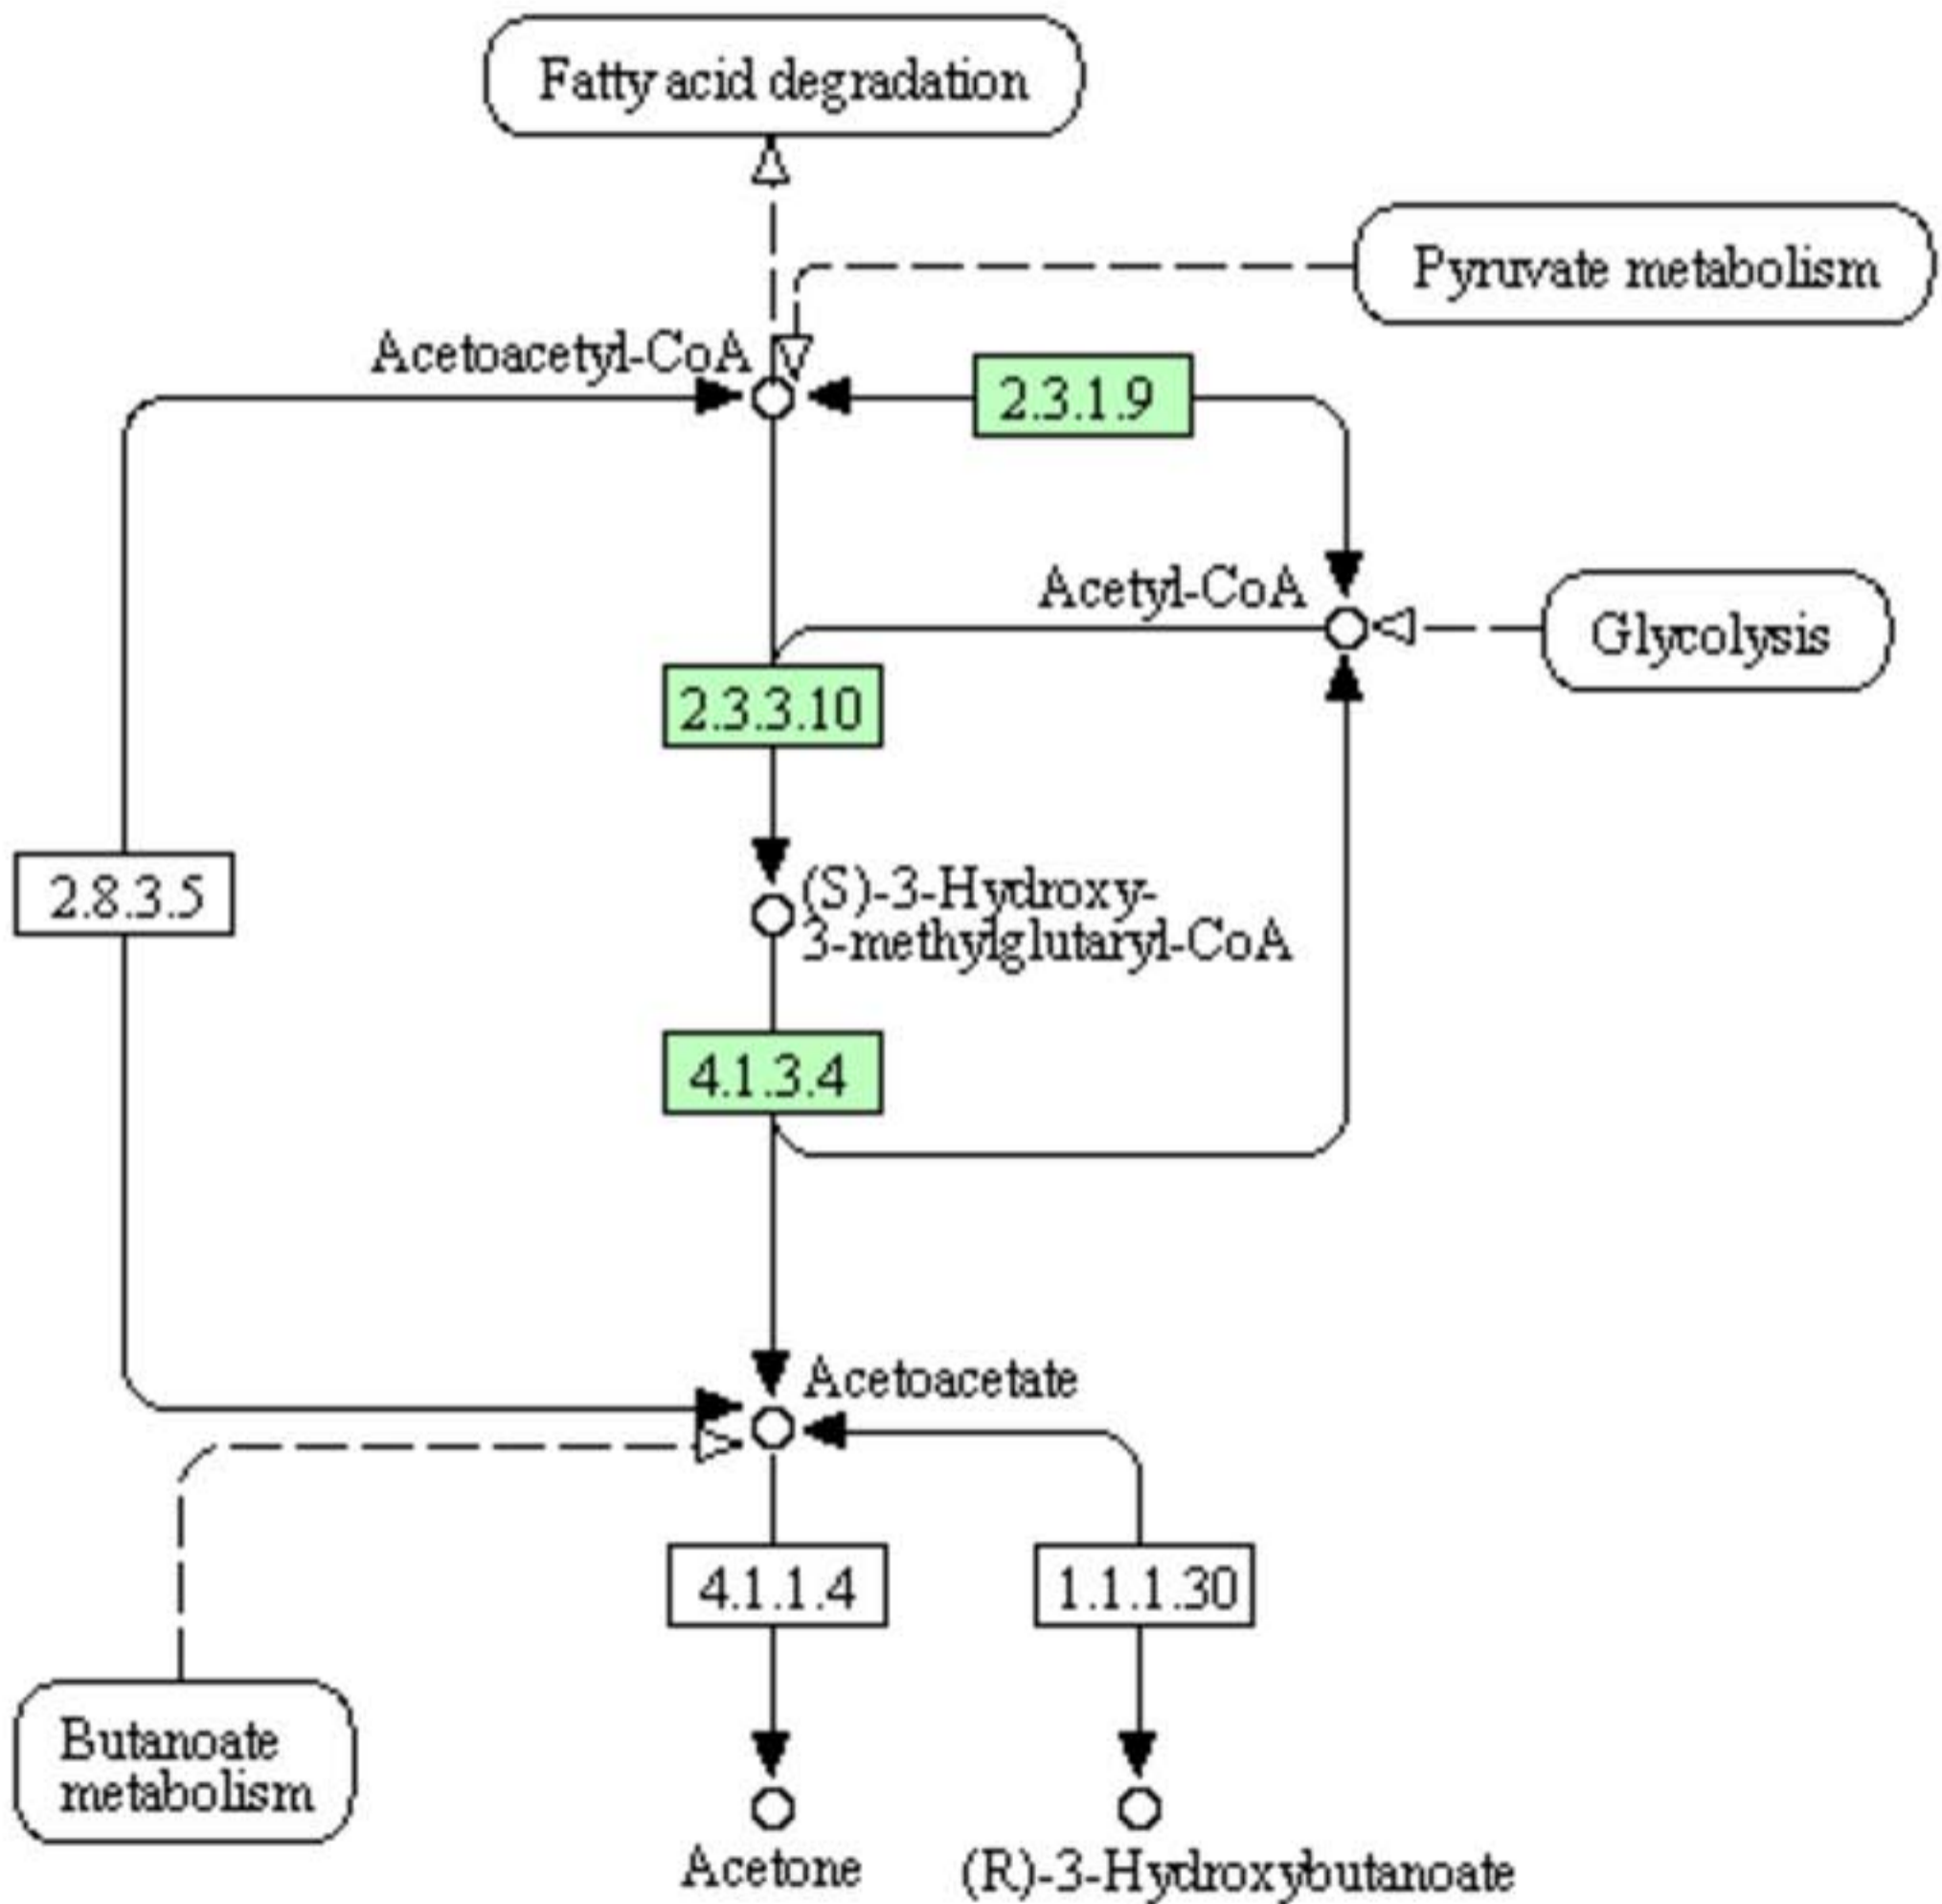



# TAURINE AND HYPOTAURINE METABOLISM

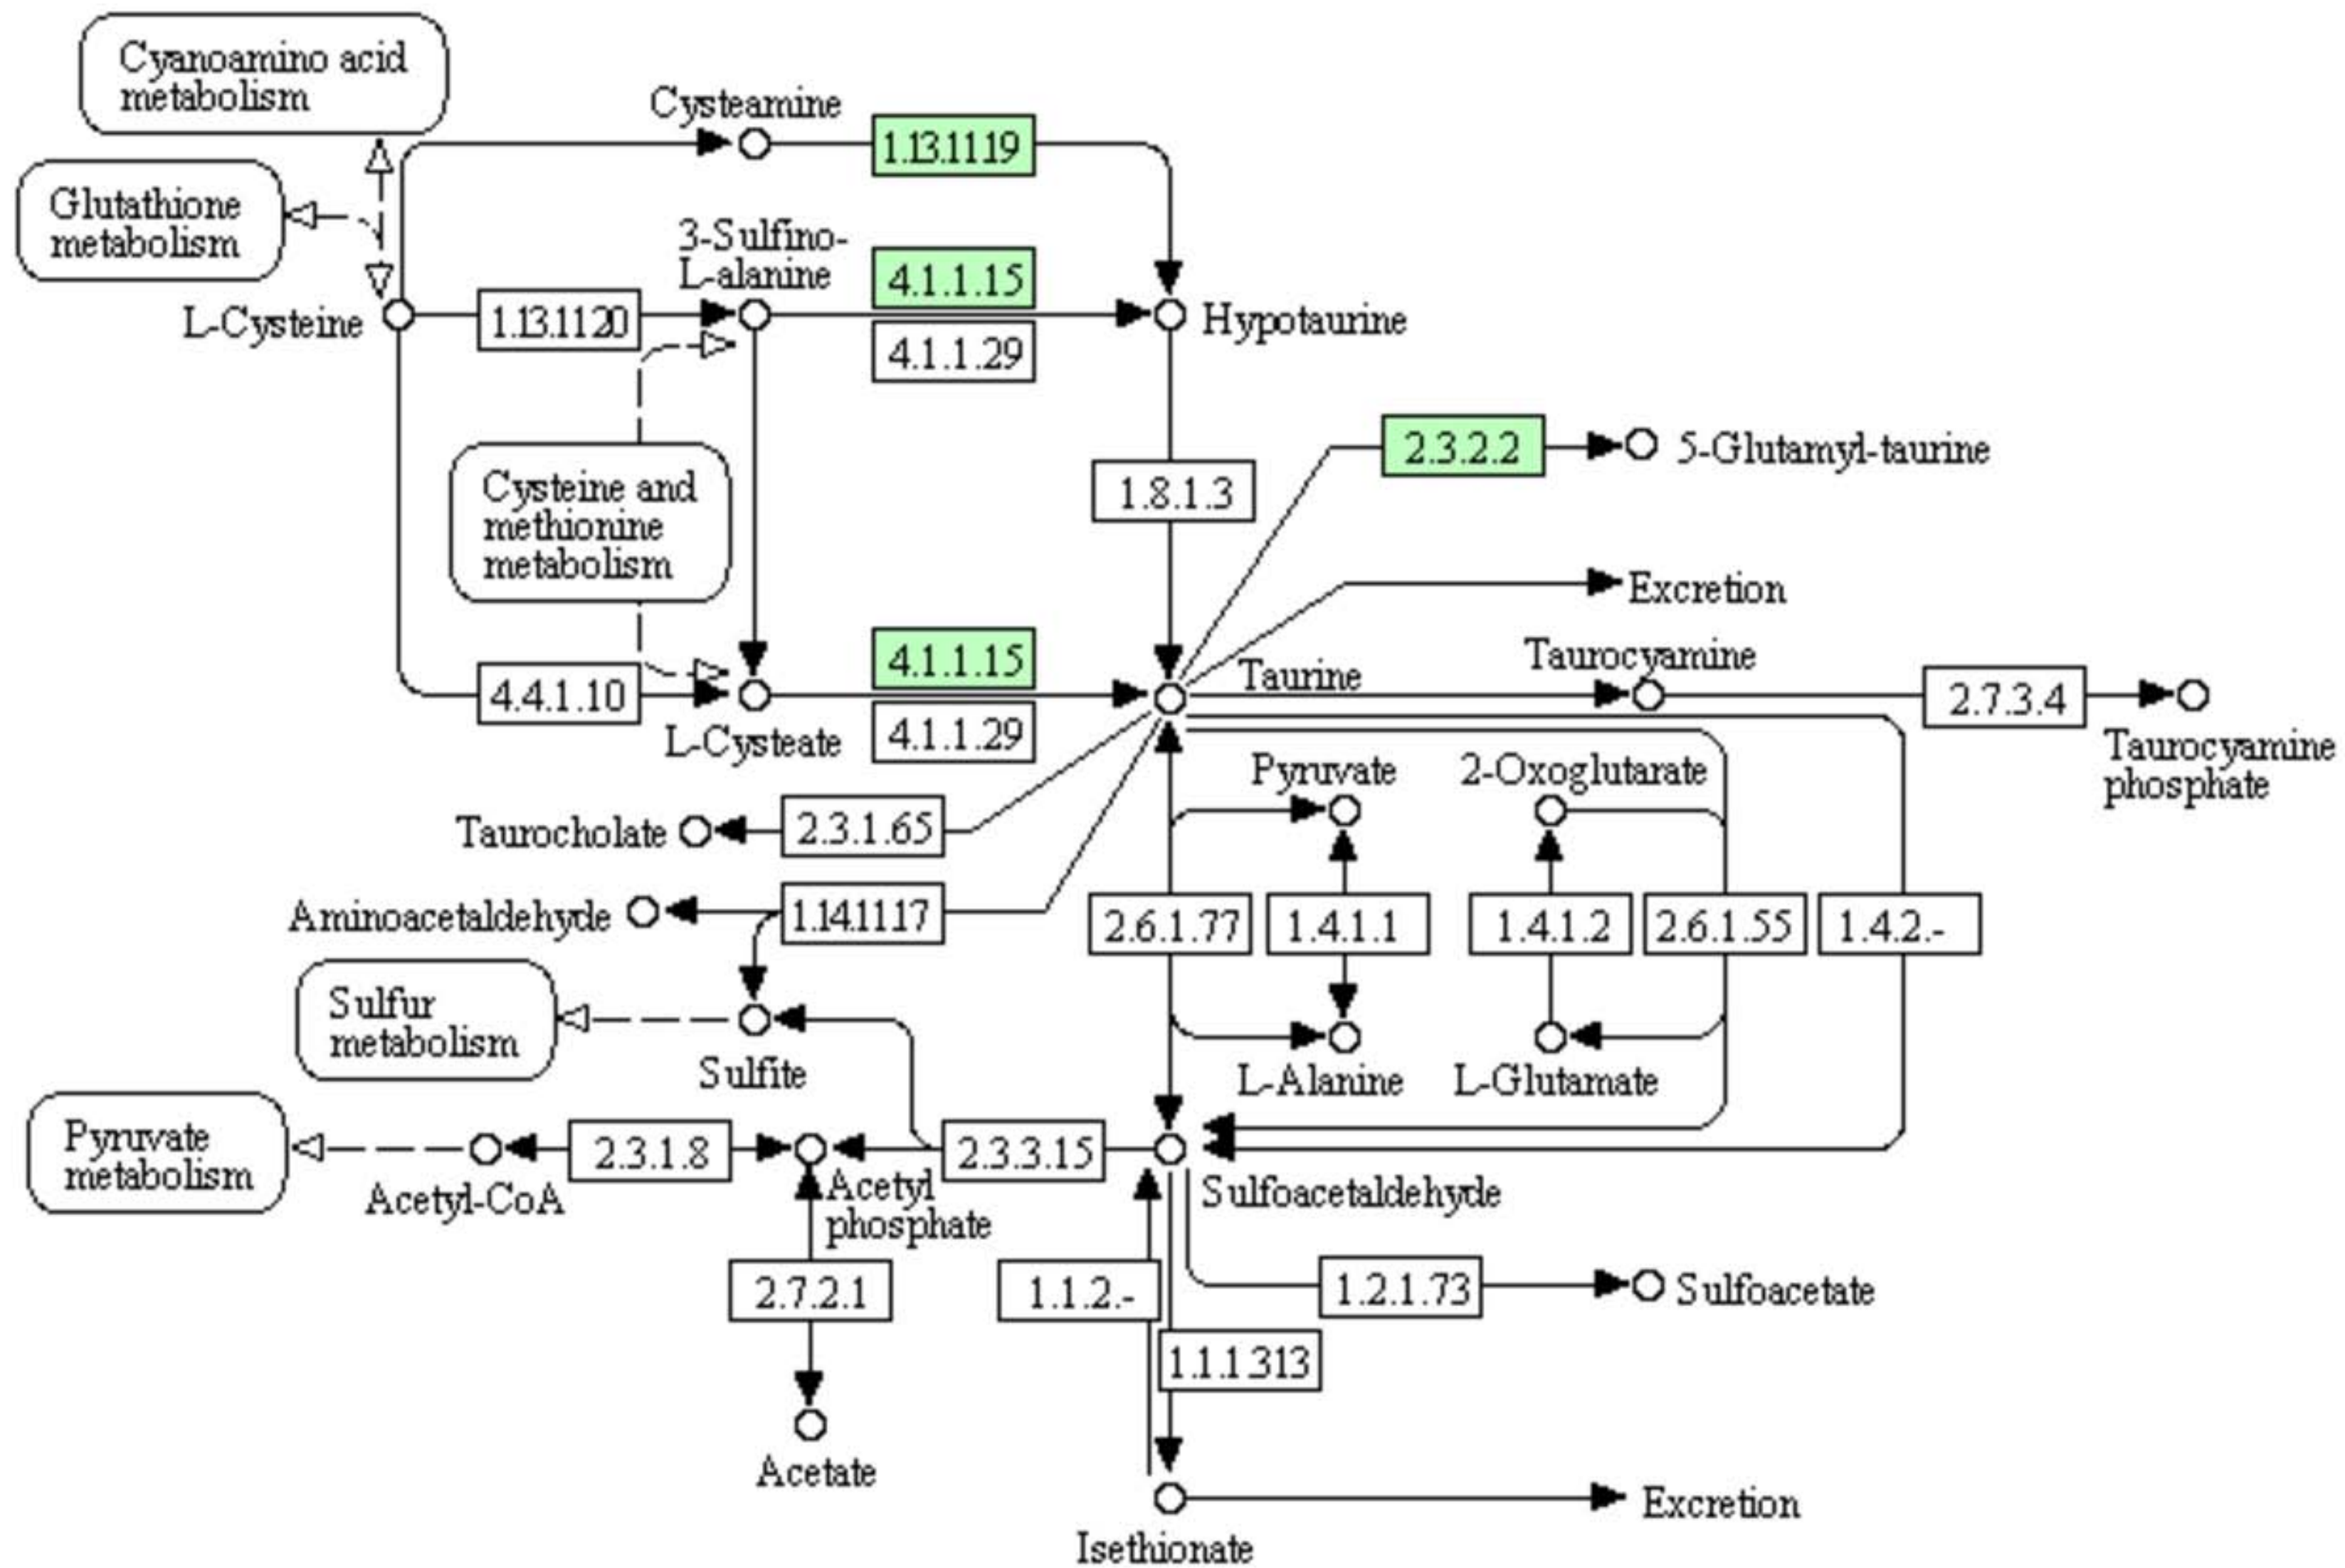







# THIAMINE METABOLISM

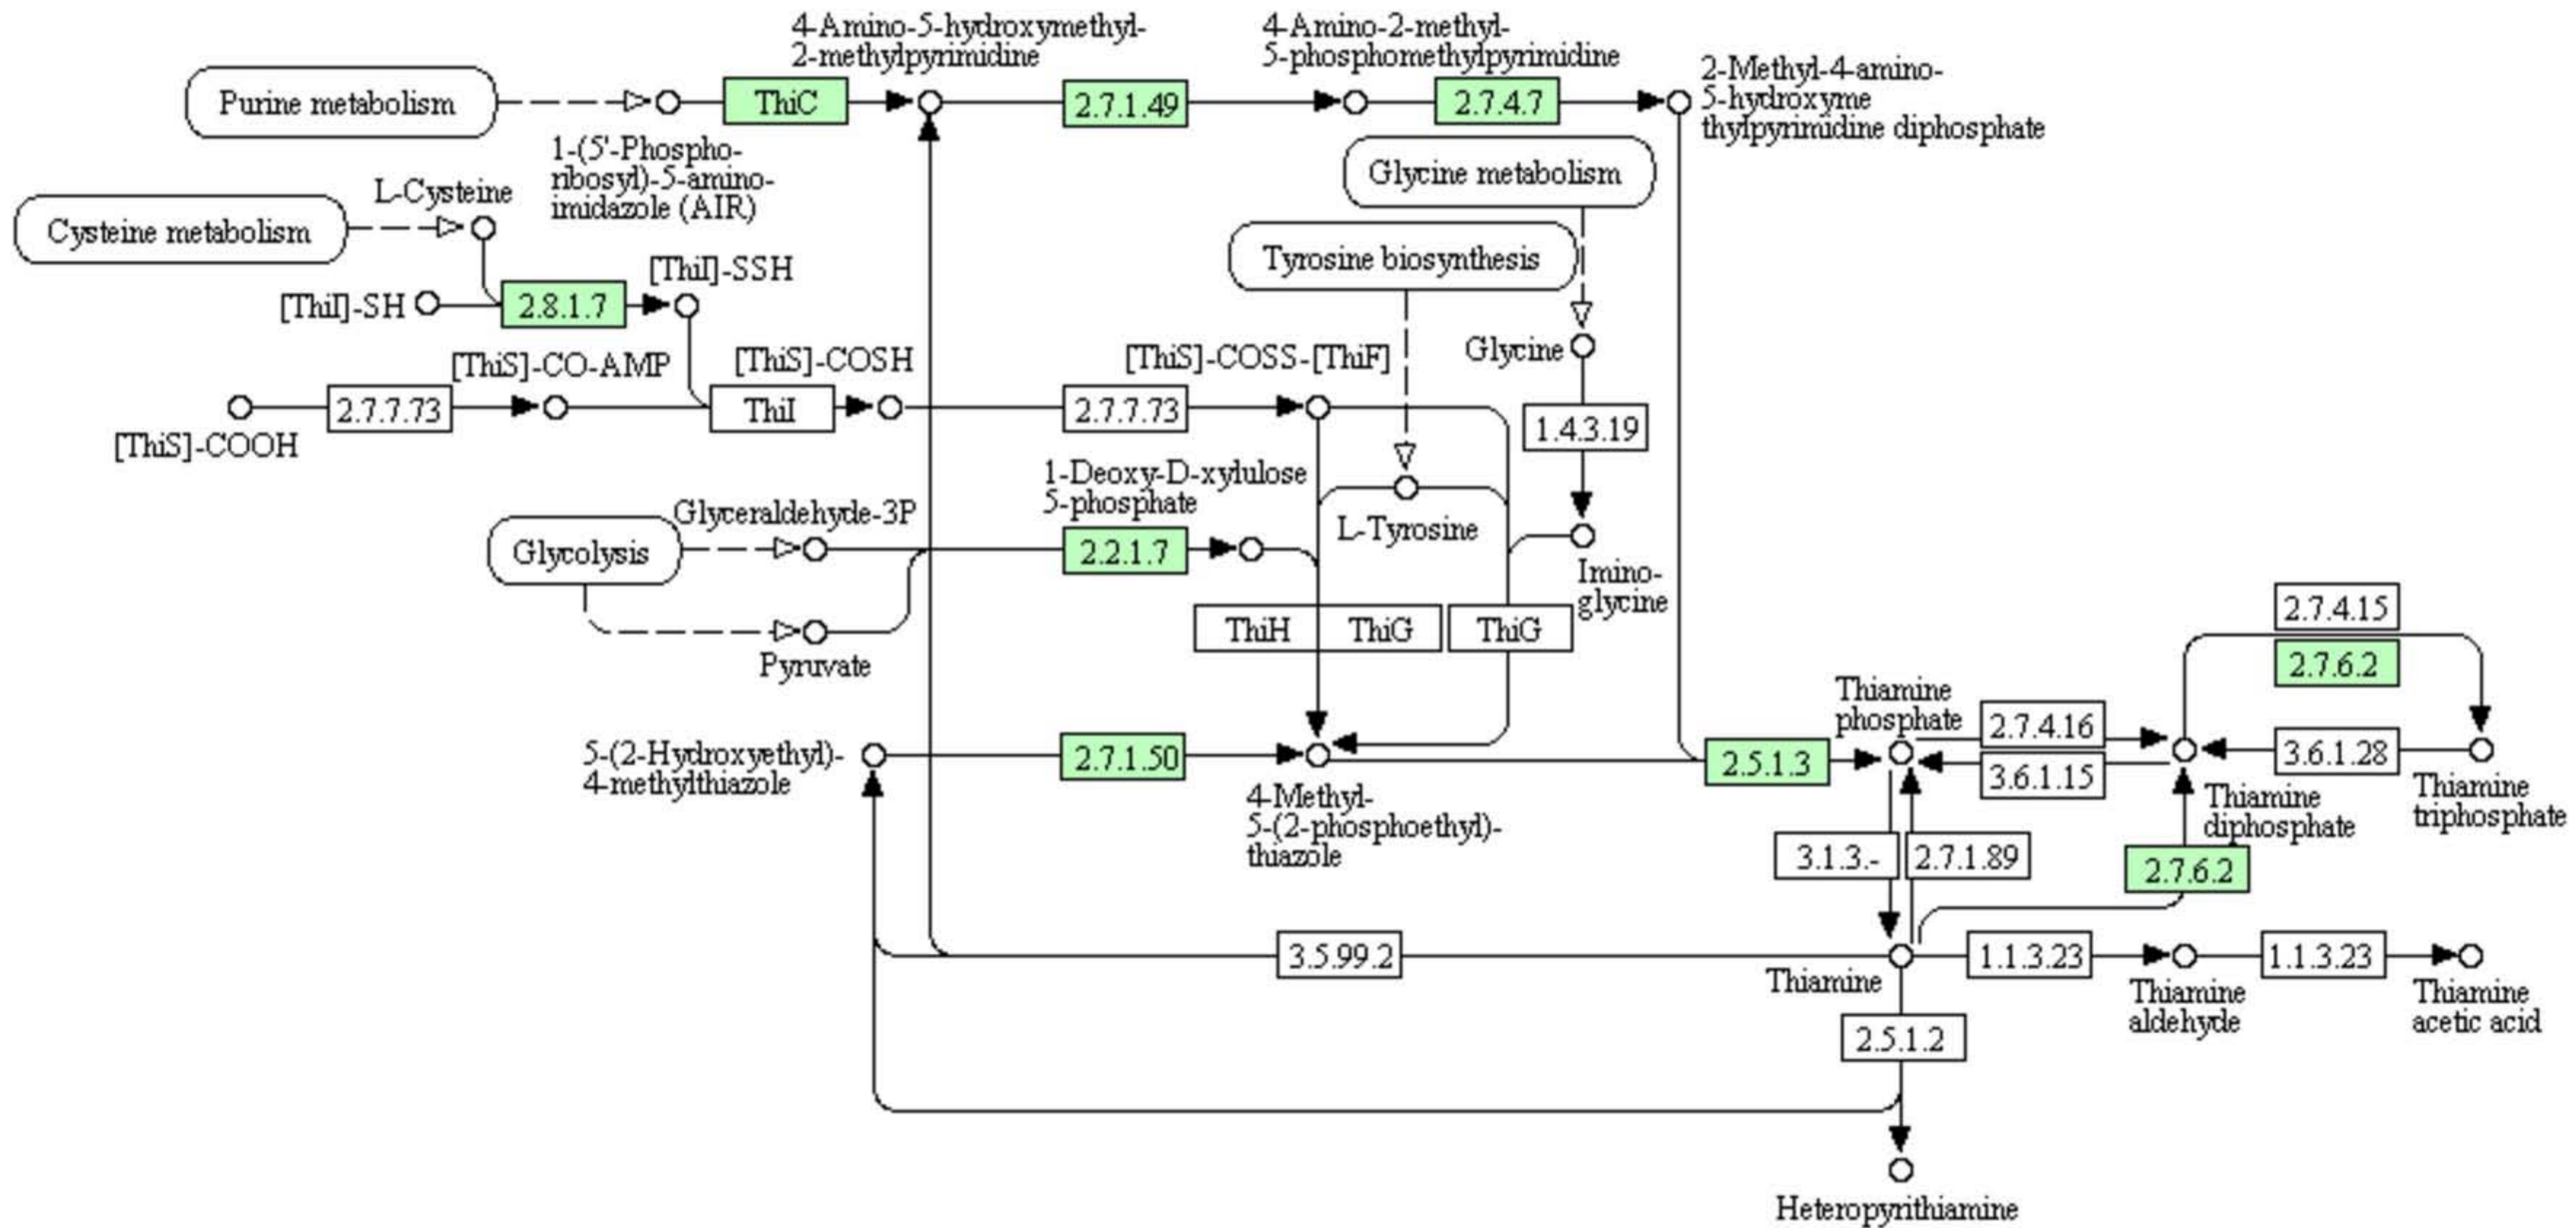



# TIGHT JUNCTION

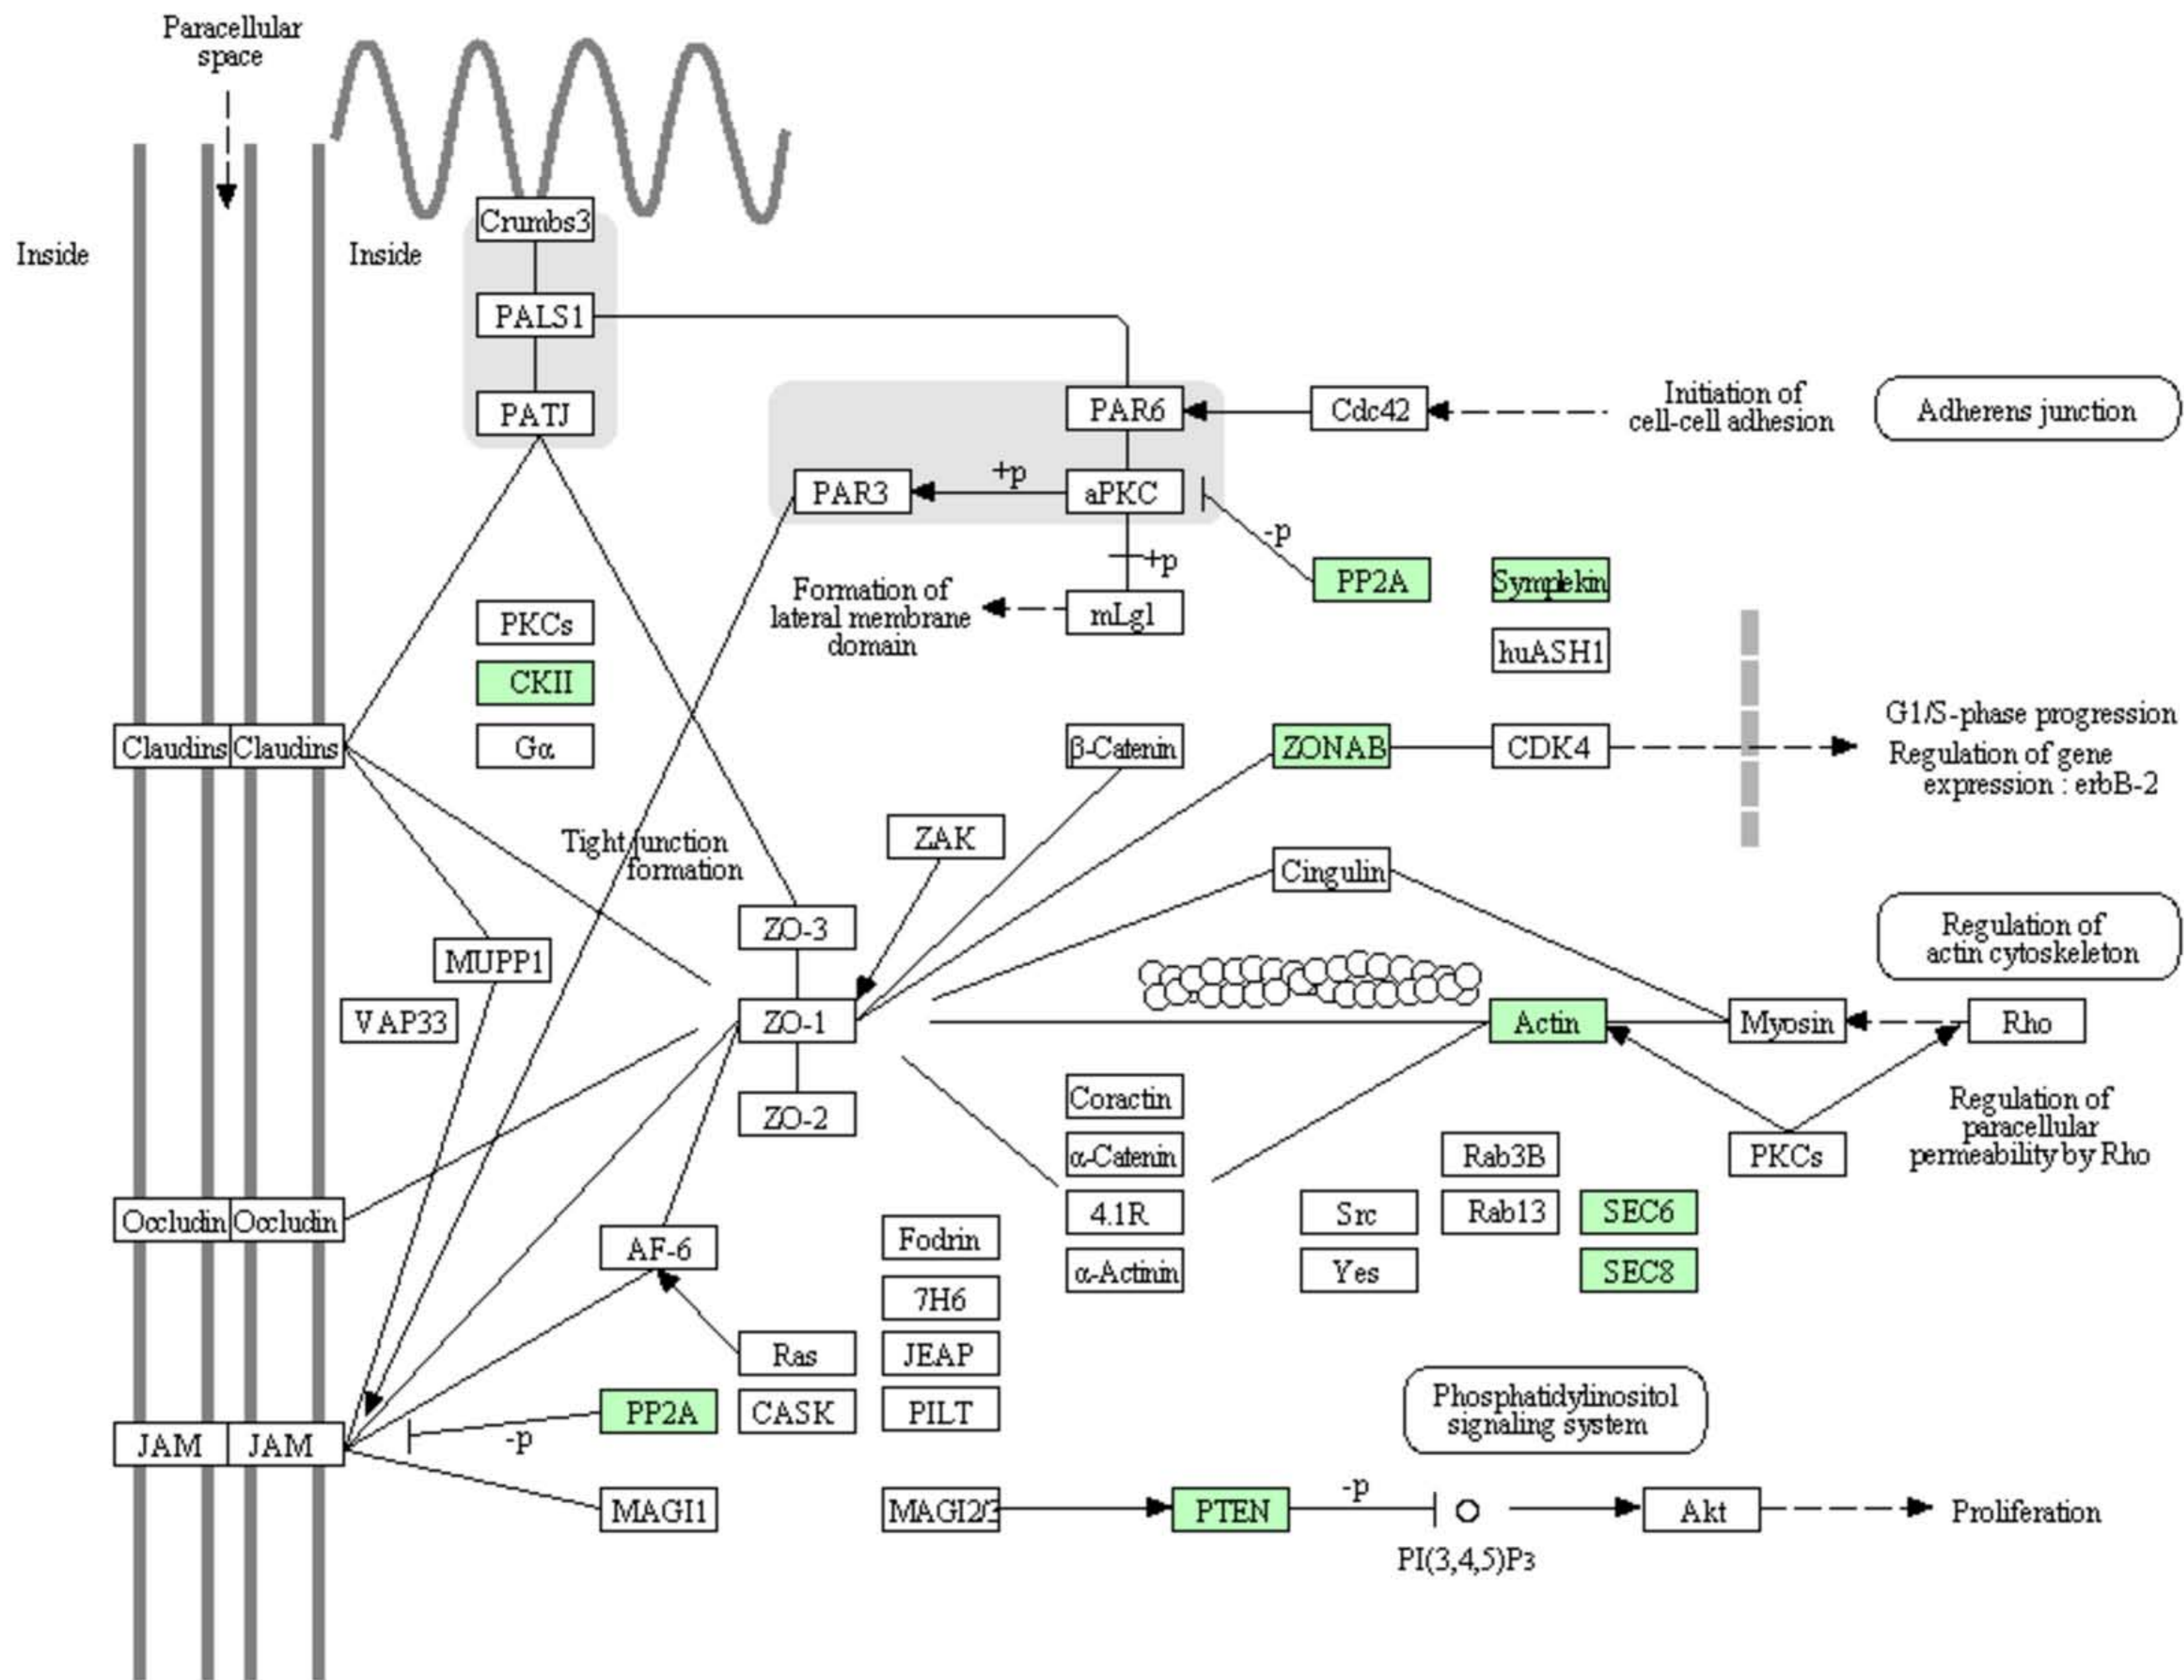



# TOLL-LIKE RECEPTOR SIGNALING PATHWAY

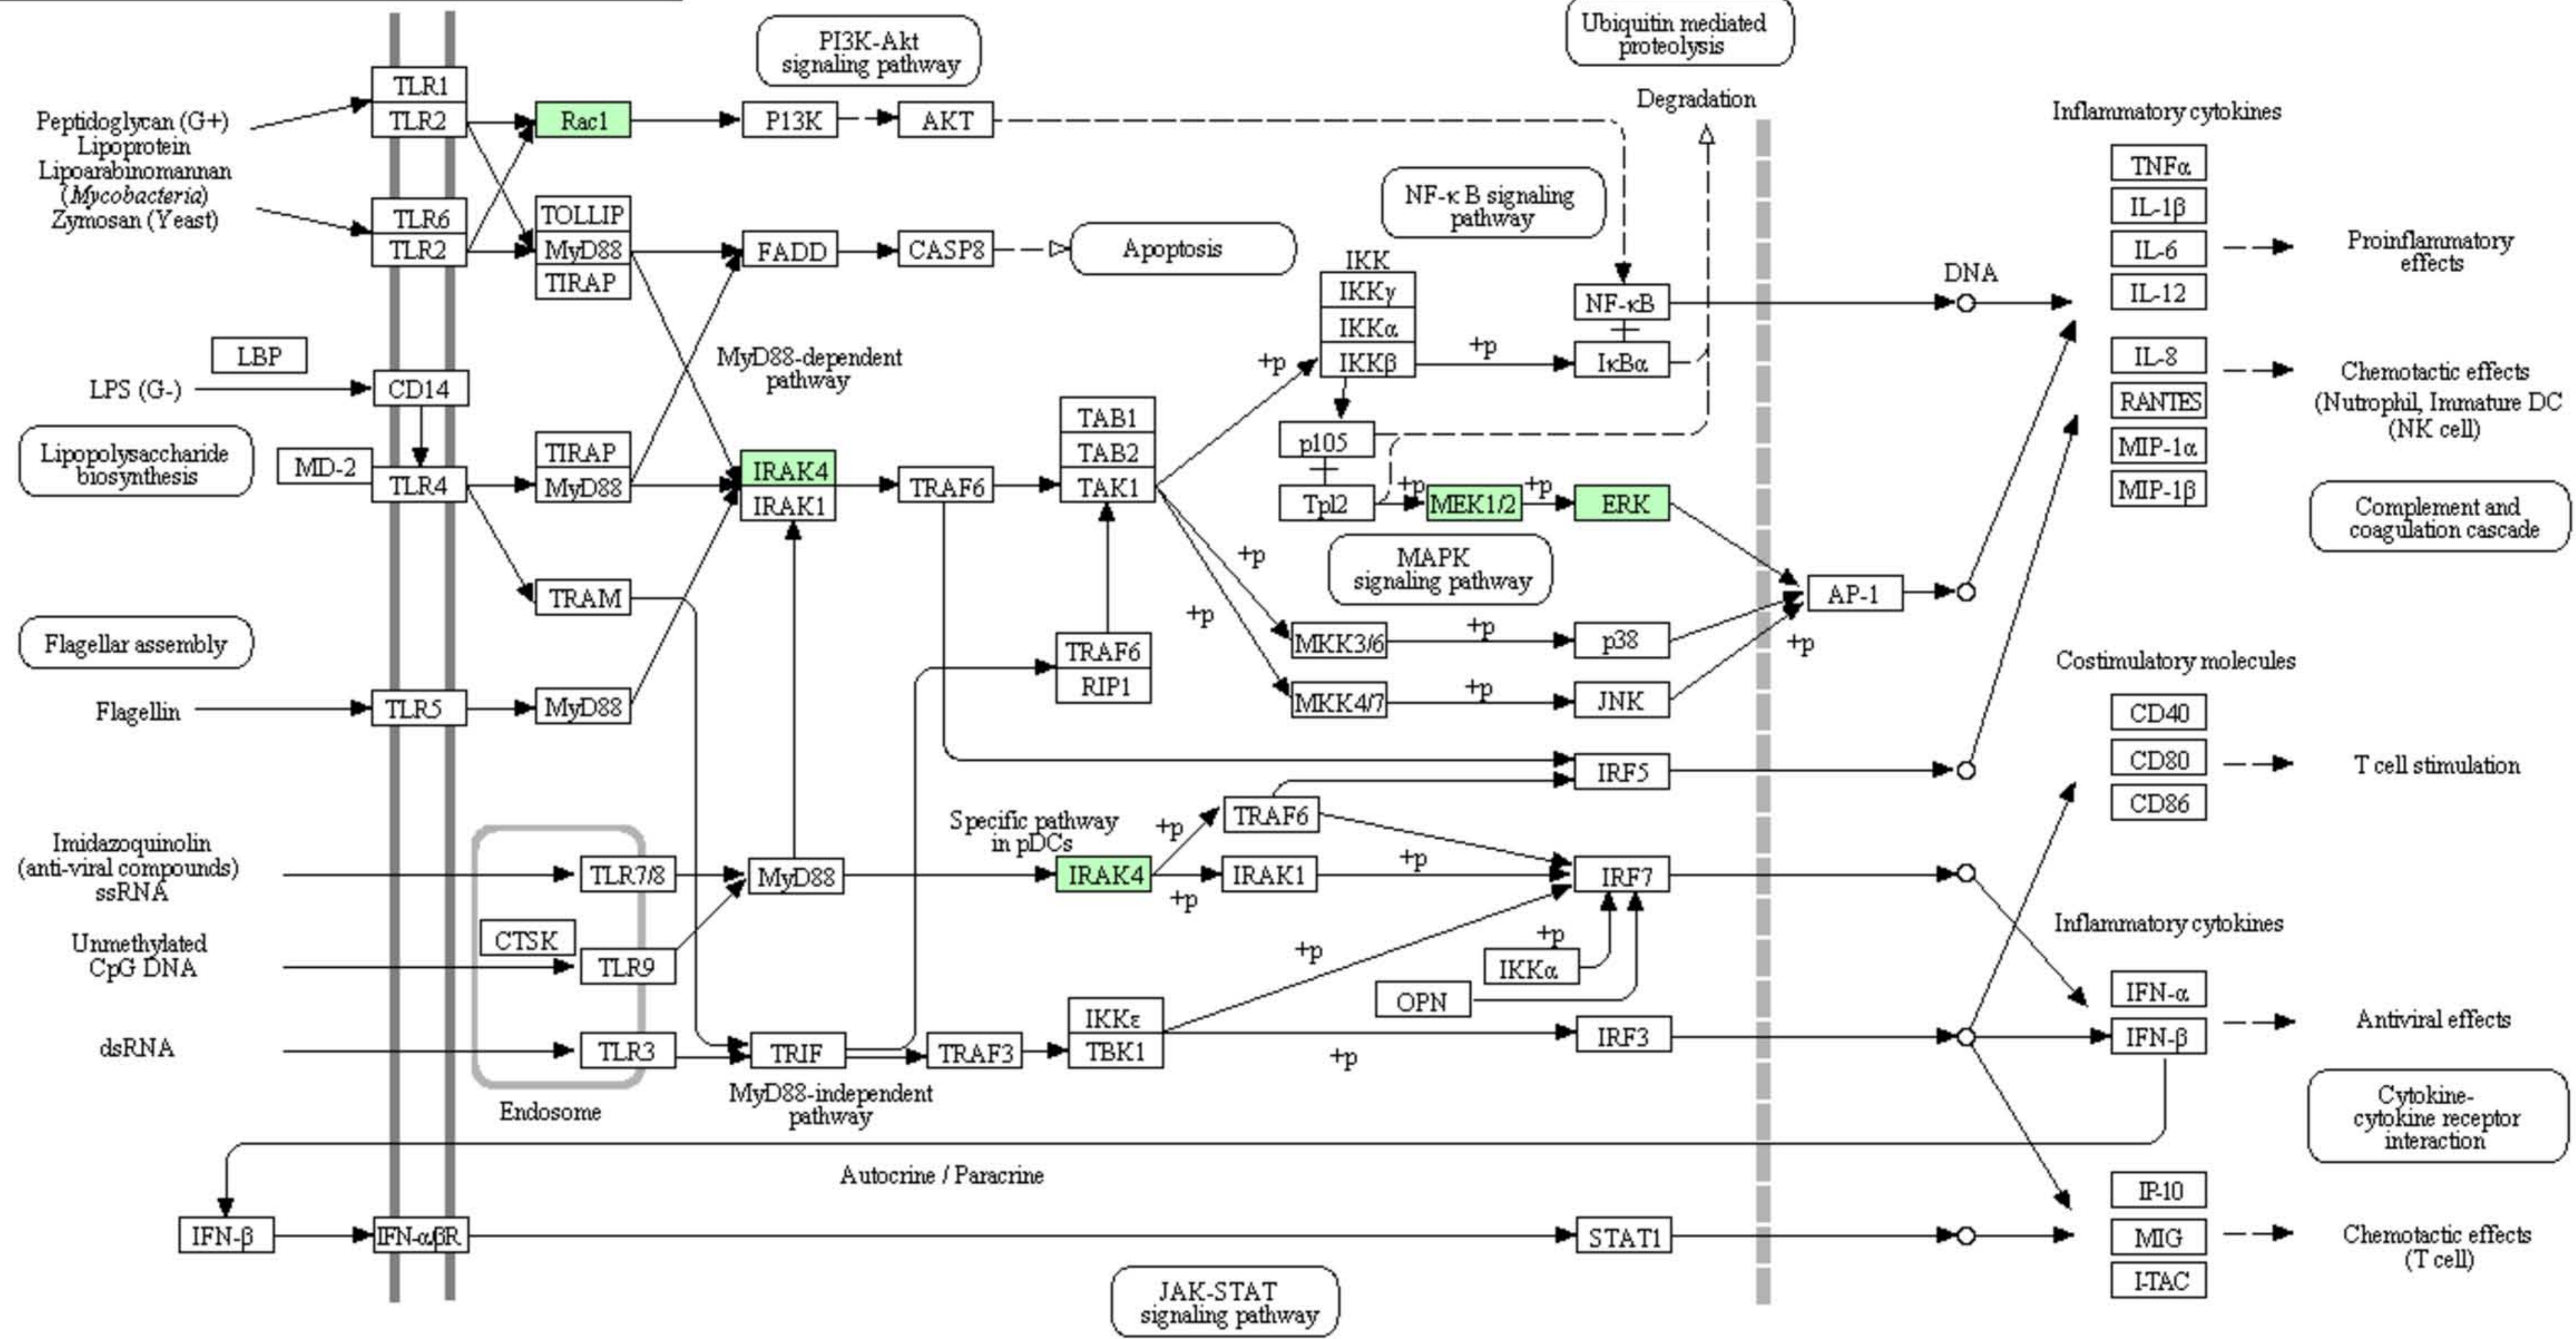



# TOLUENE DEGRADATION

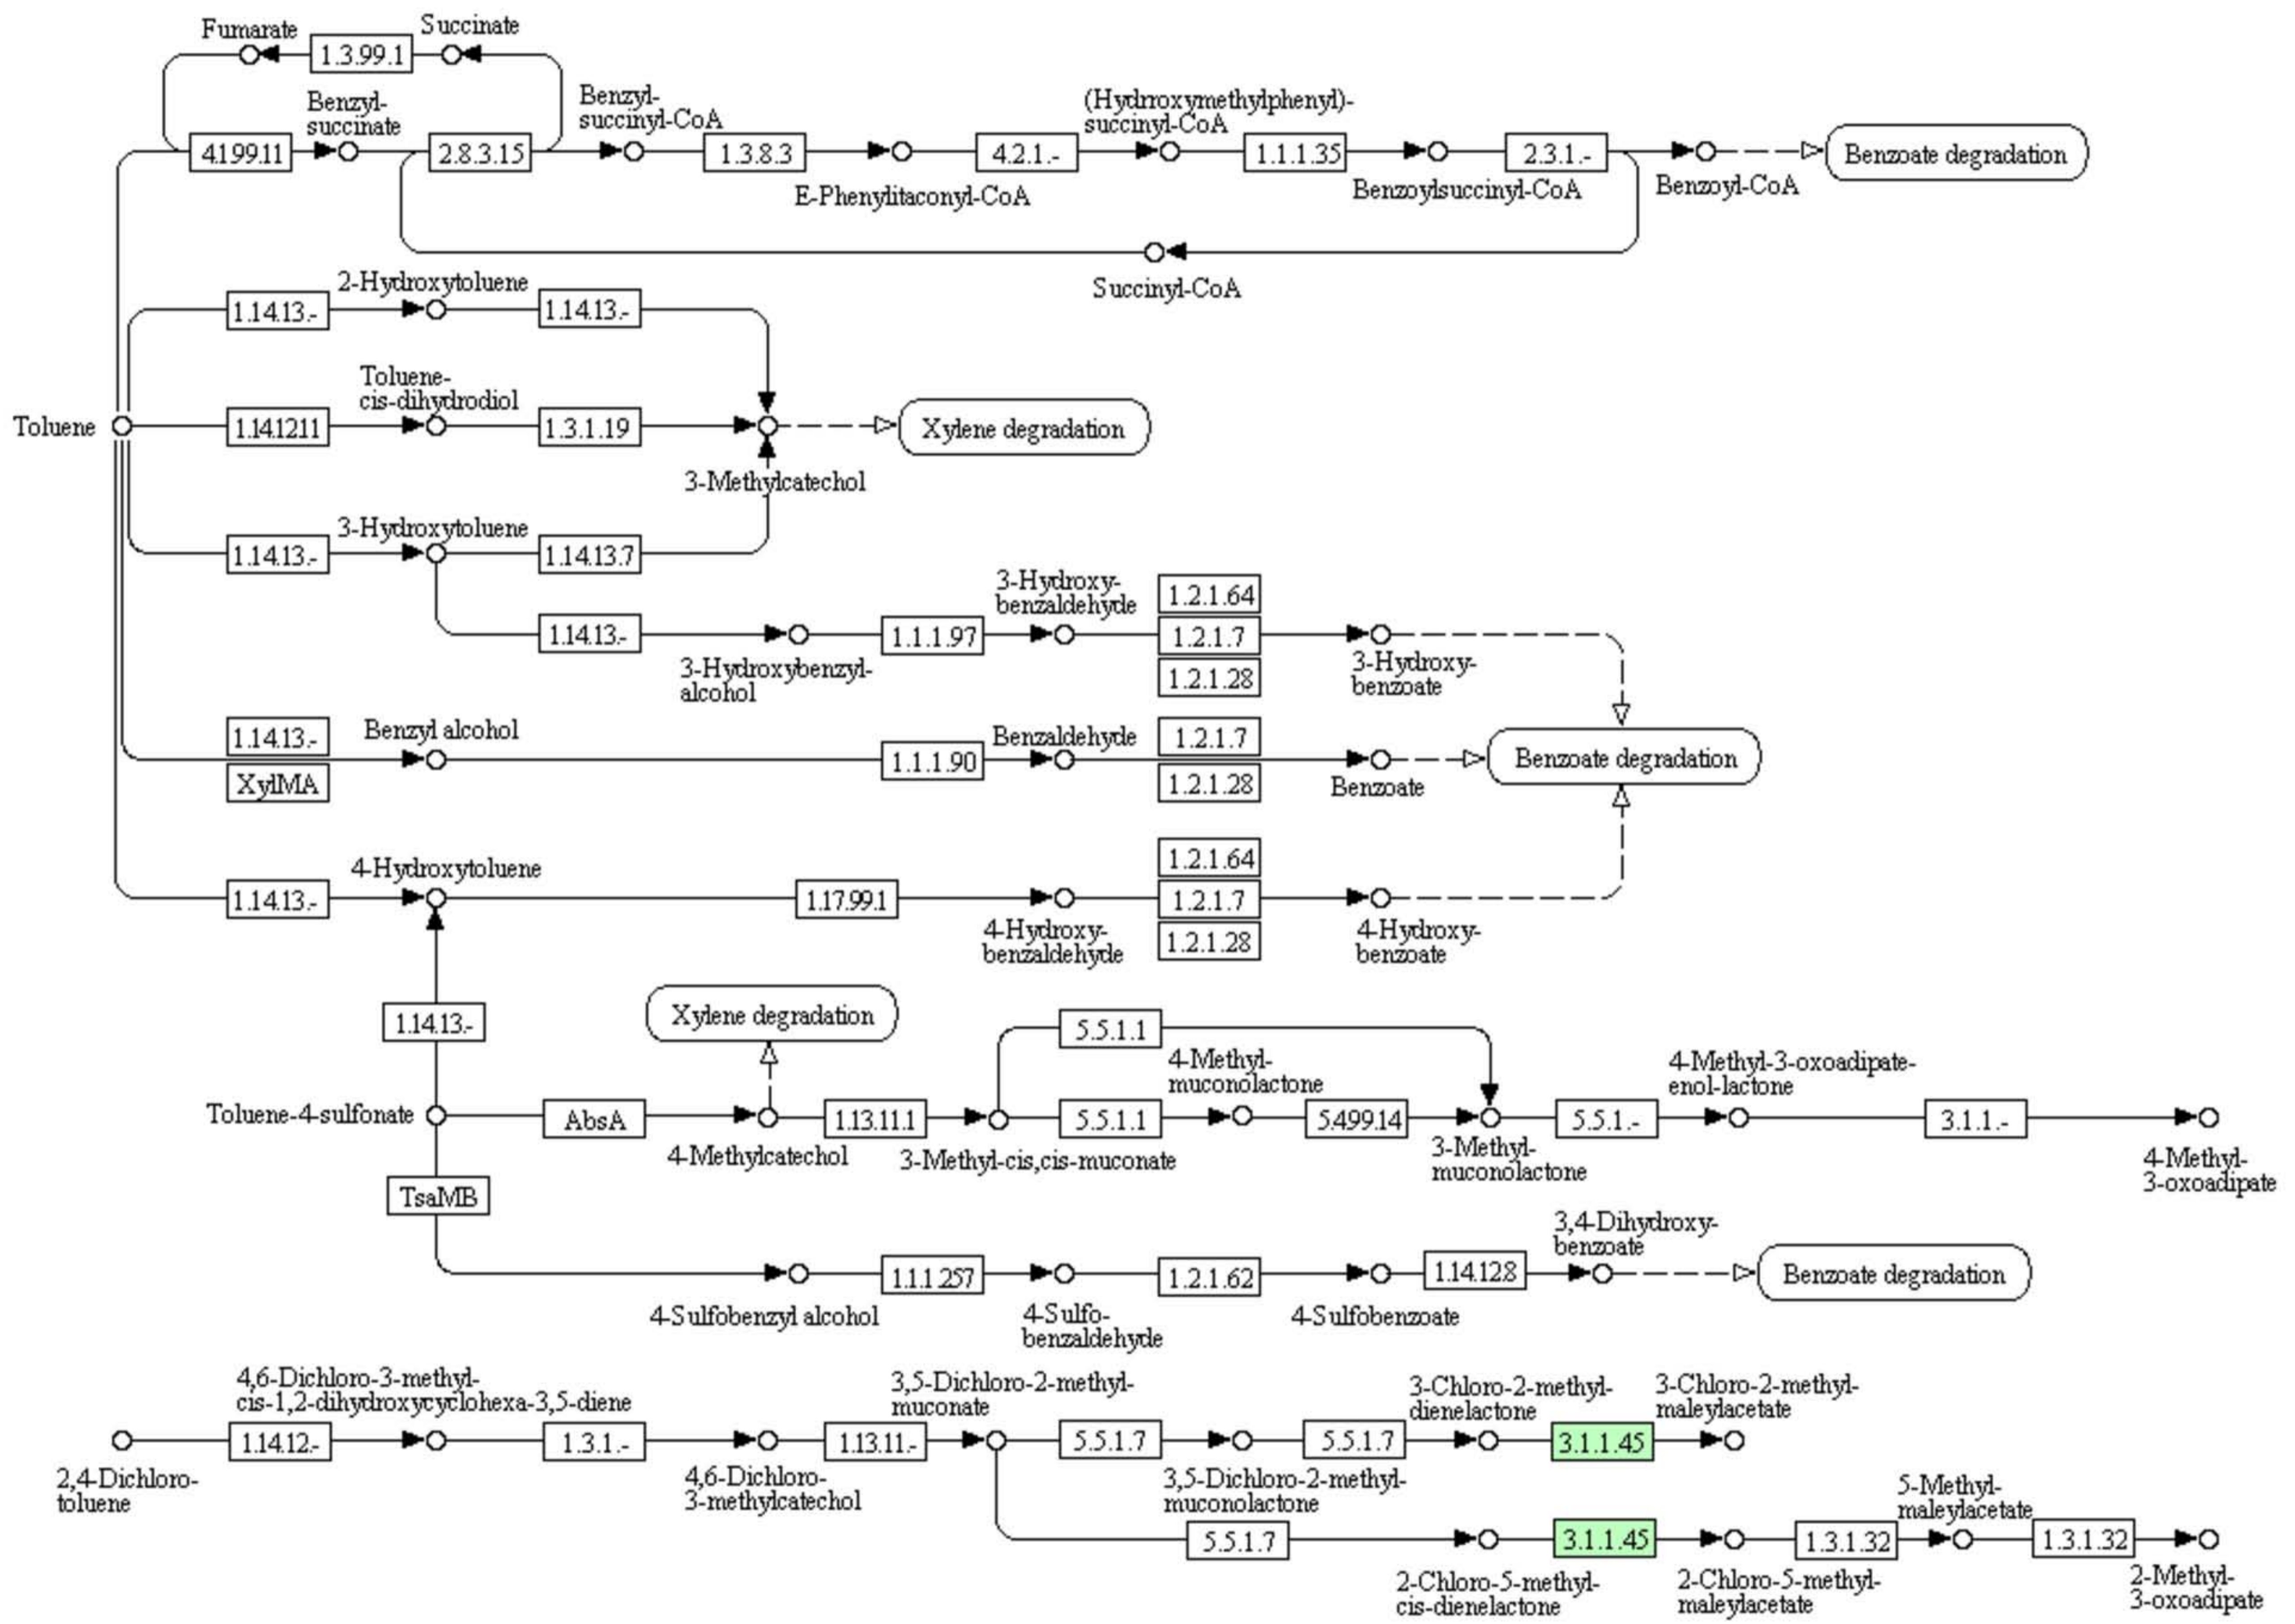



TROPANE, PIPERIDINE AND PYRIDINE ALKALOID BIOSYNTHESIS

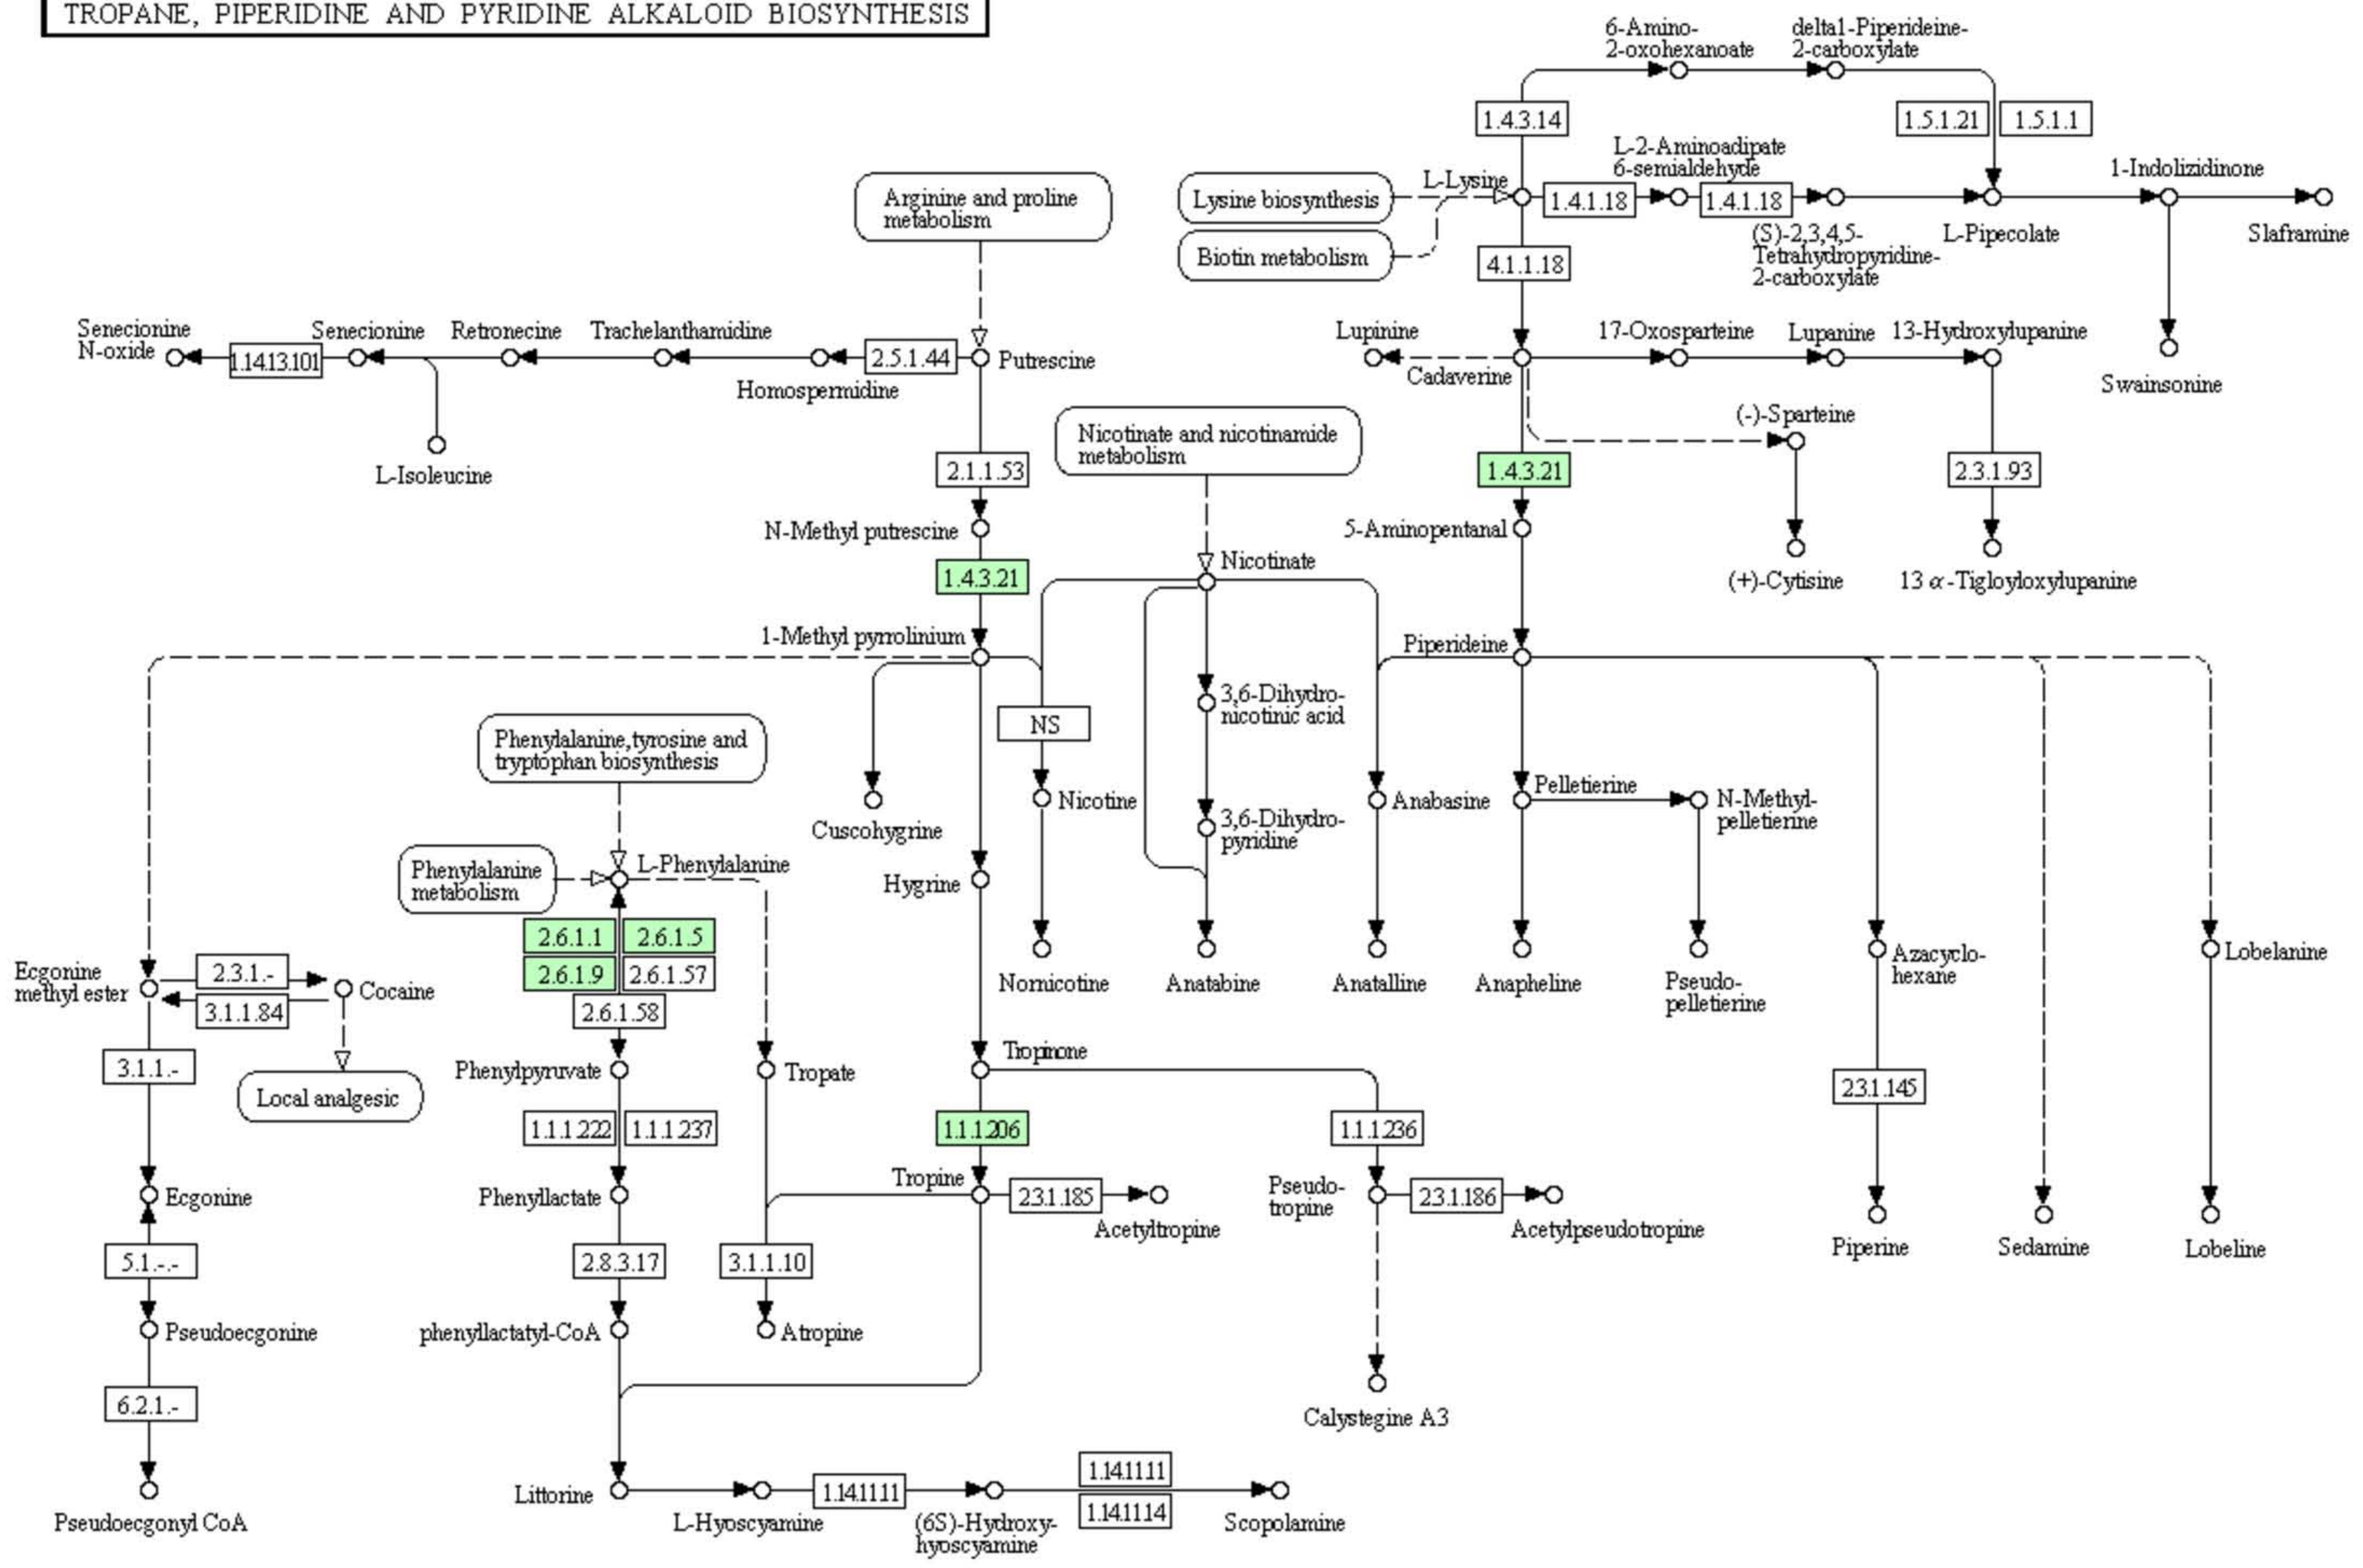



# TRYPTOPHAN METABOLISM

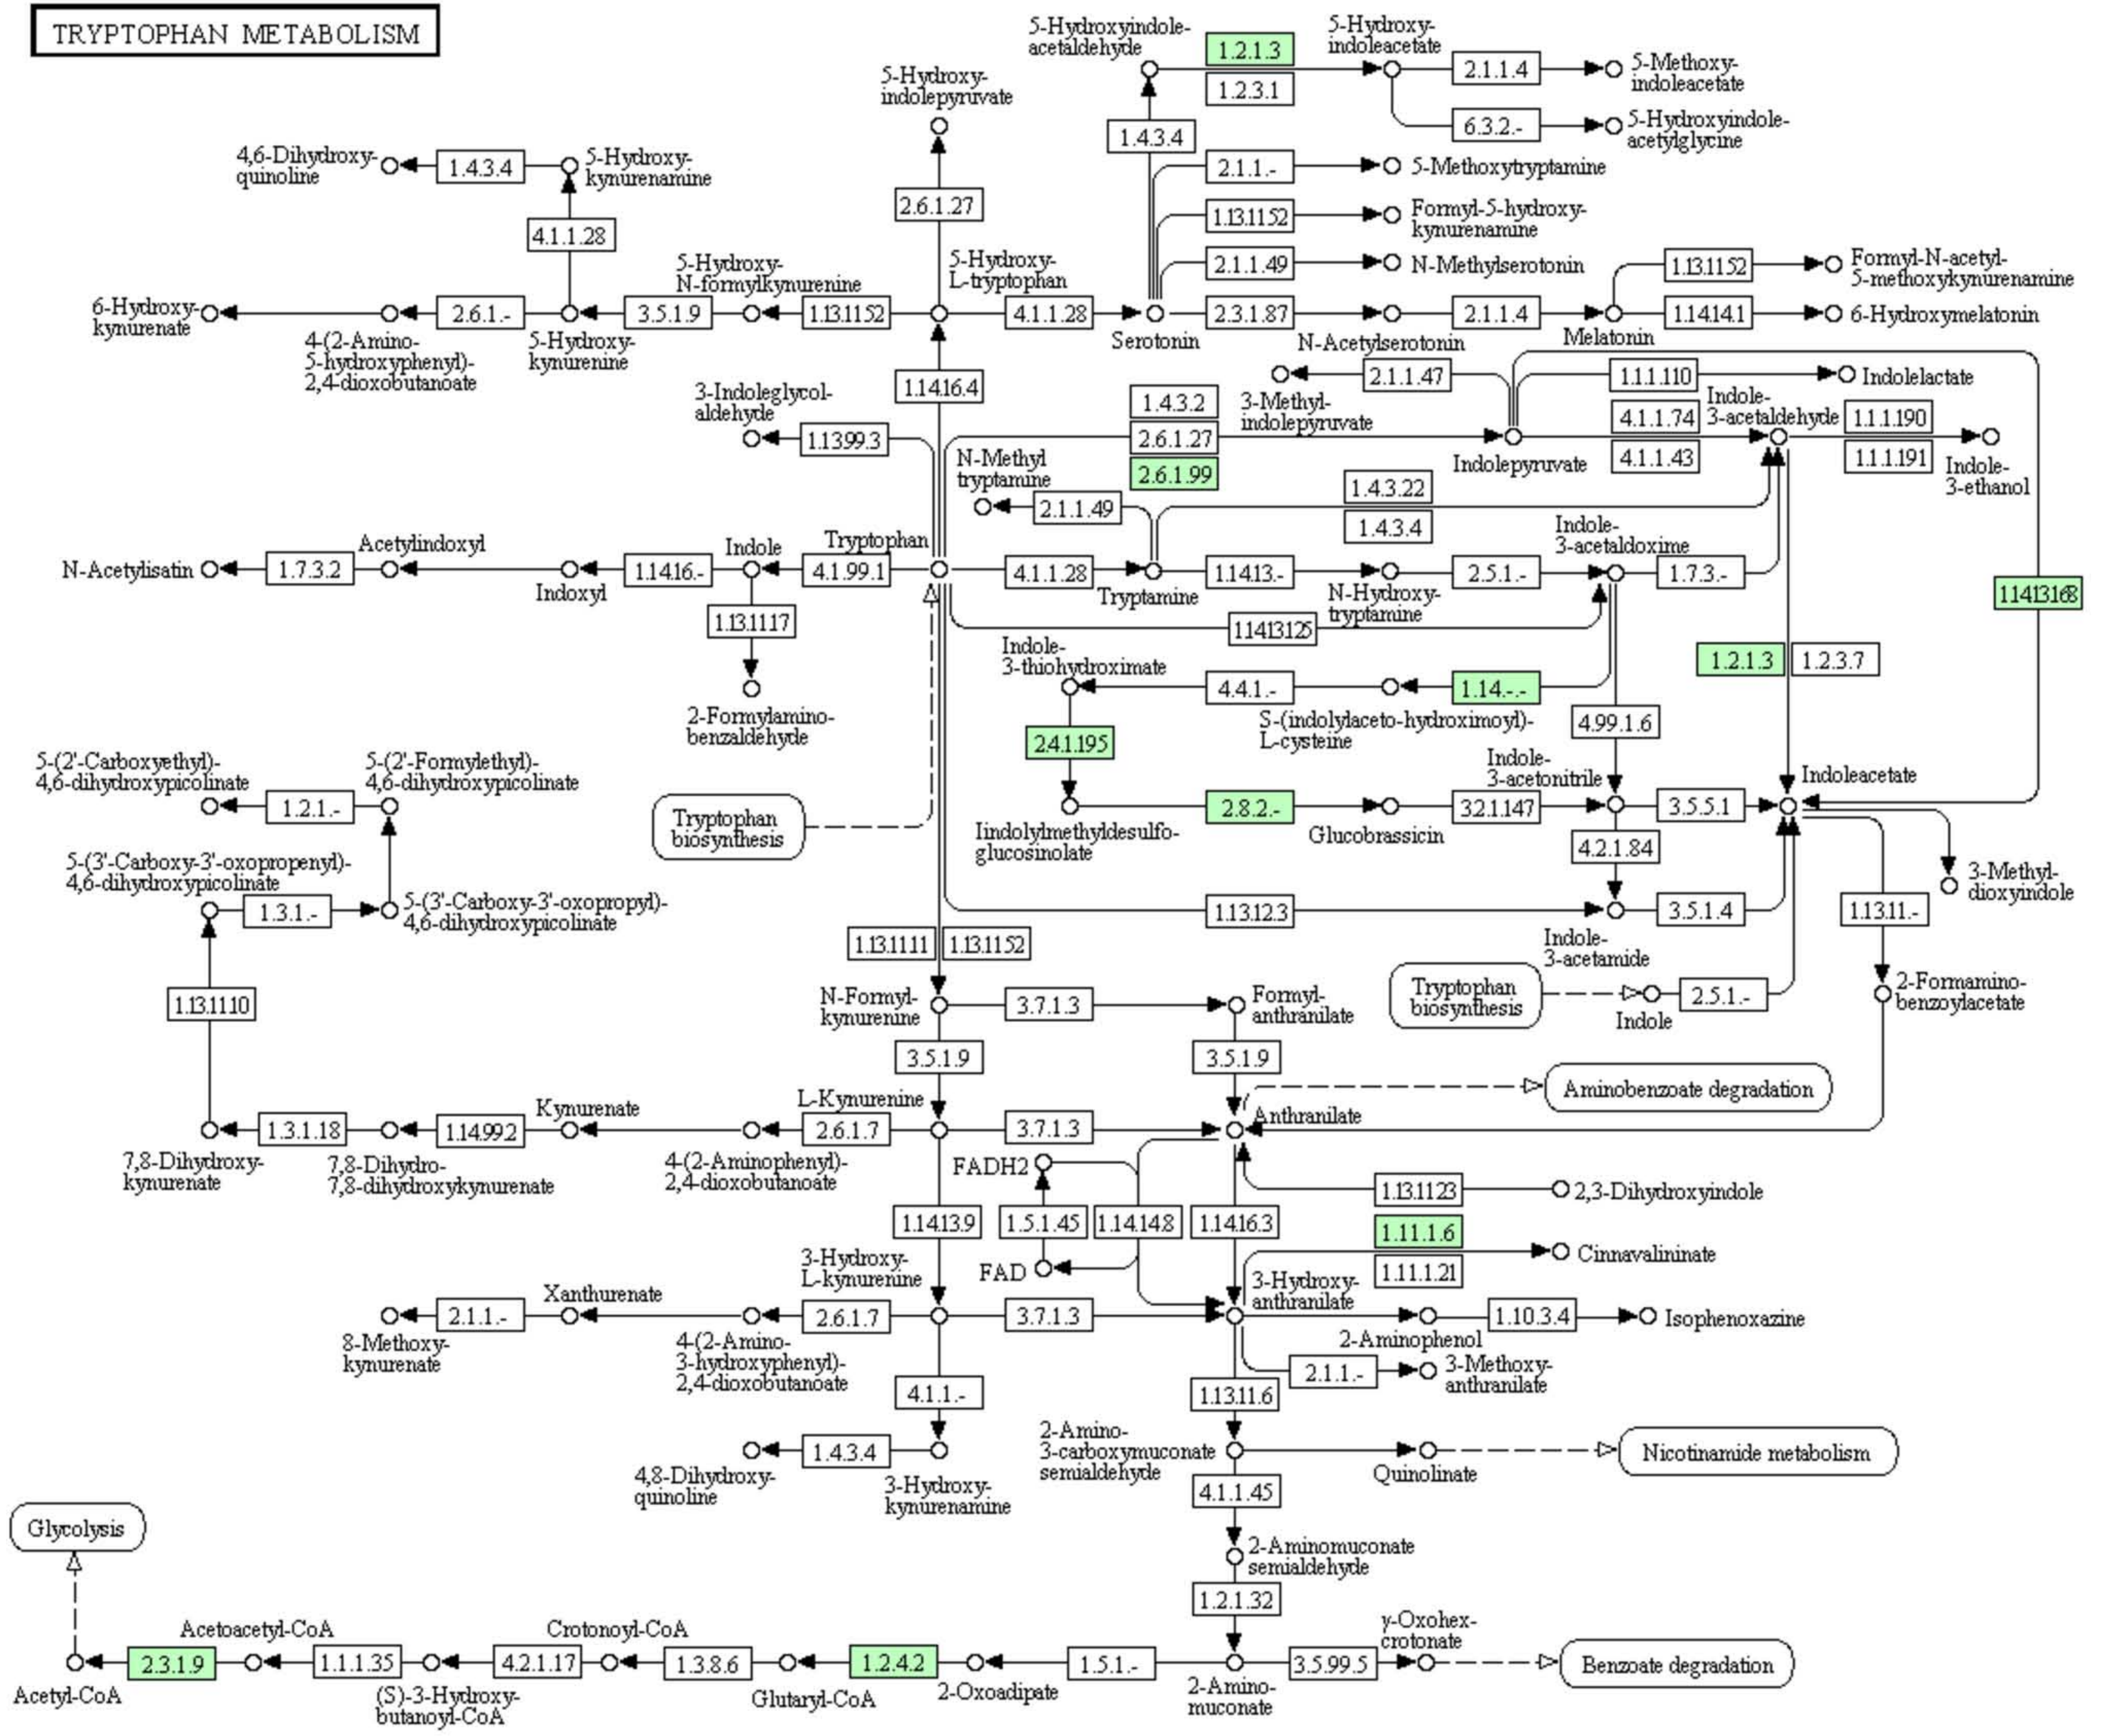



TWO-COMPONENT SYSTEM

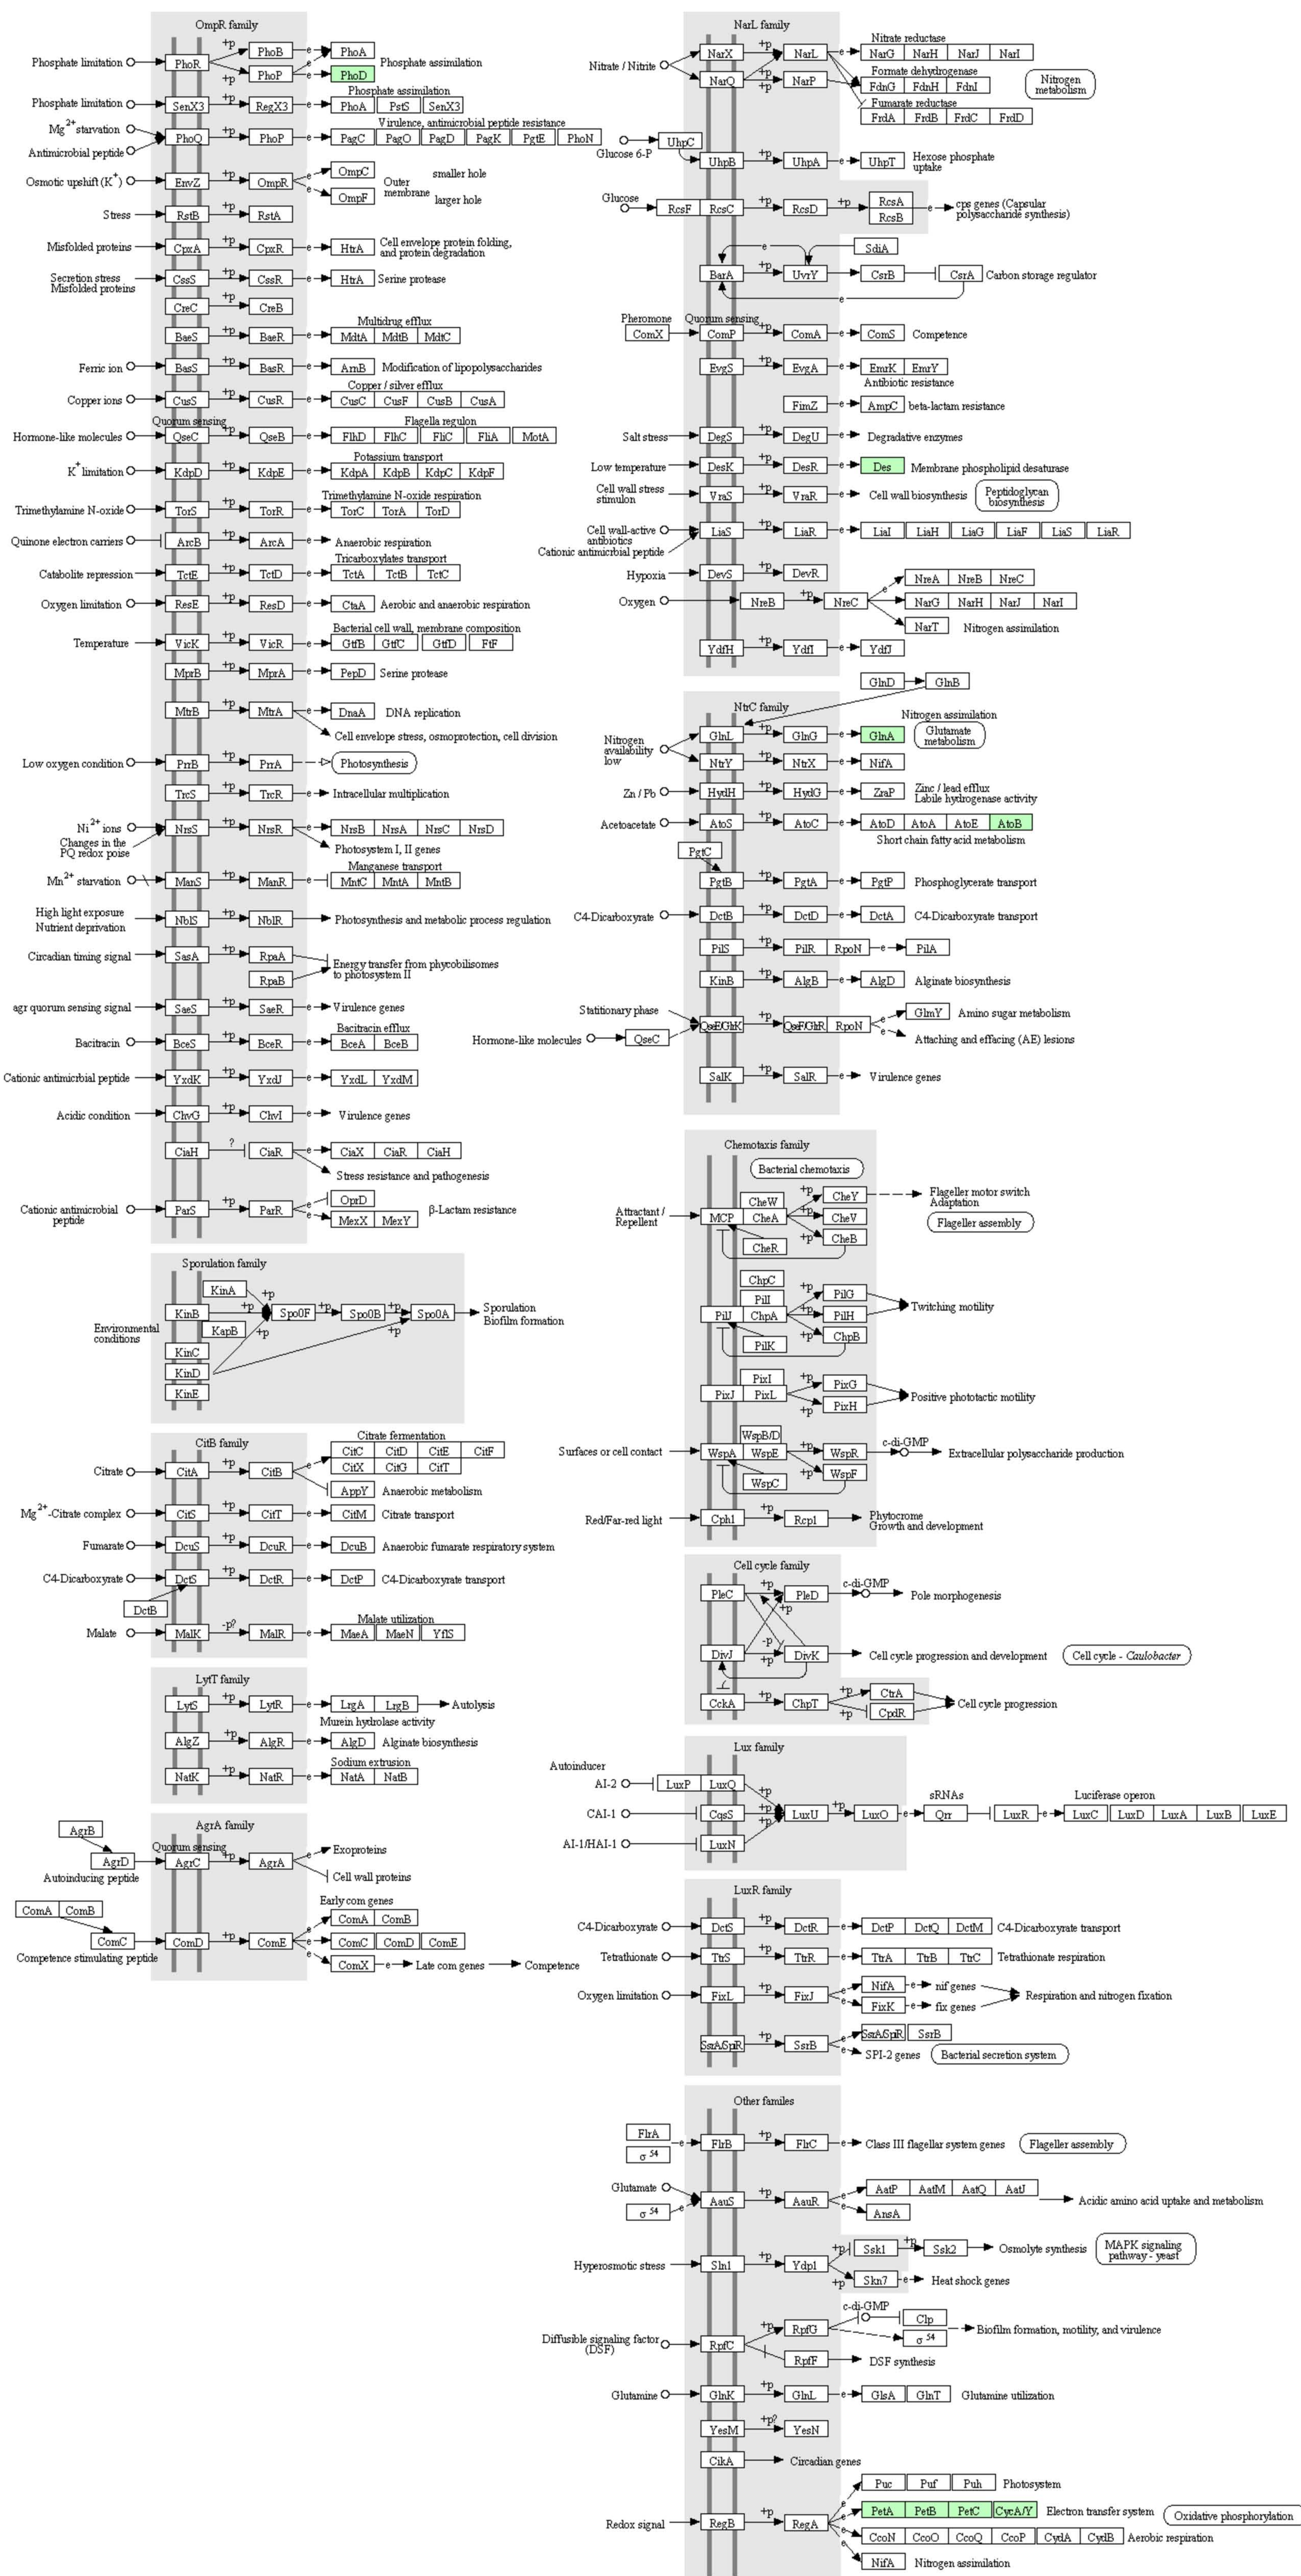











# UBIQUITIN MEDIATED PROTEOLYSIS

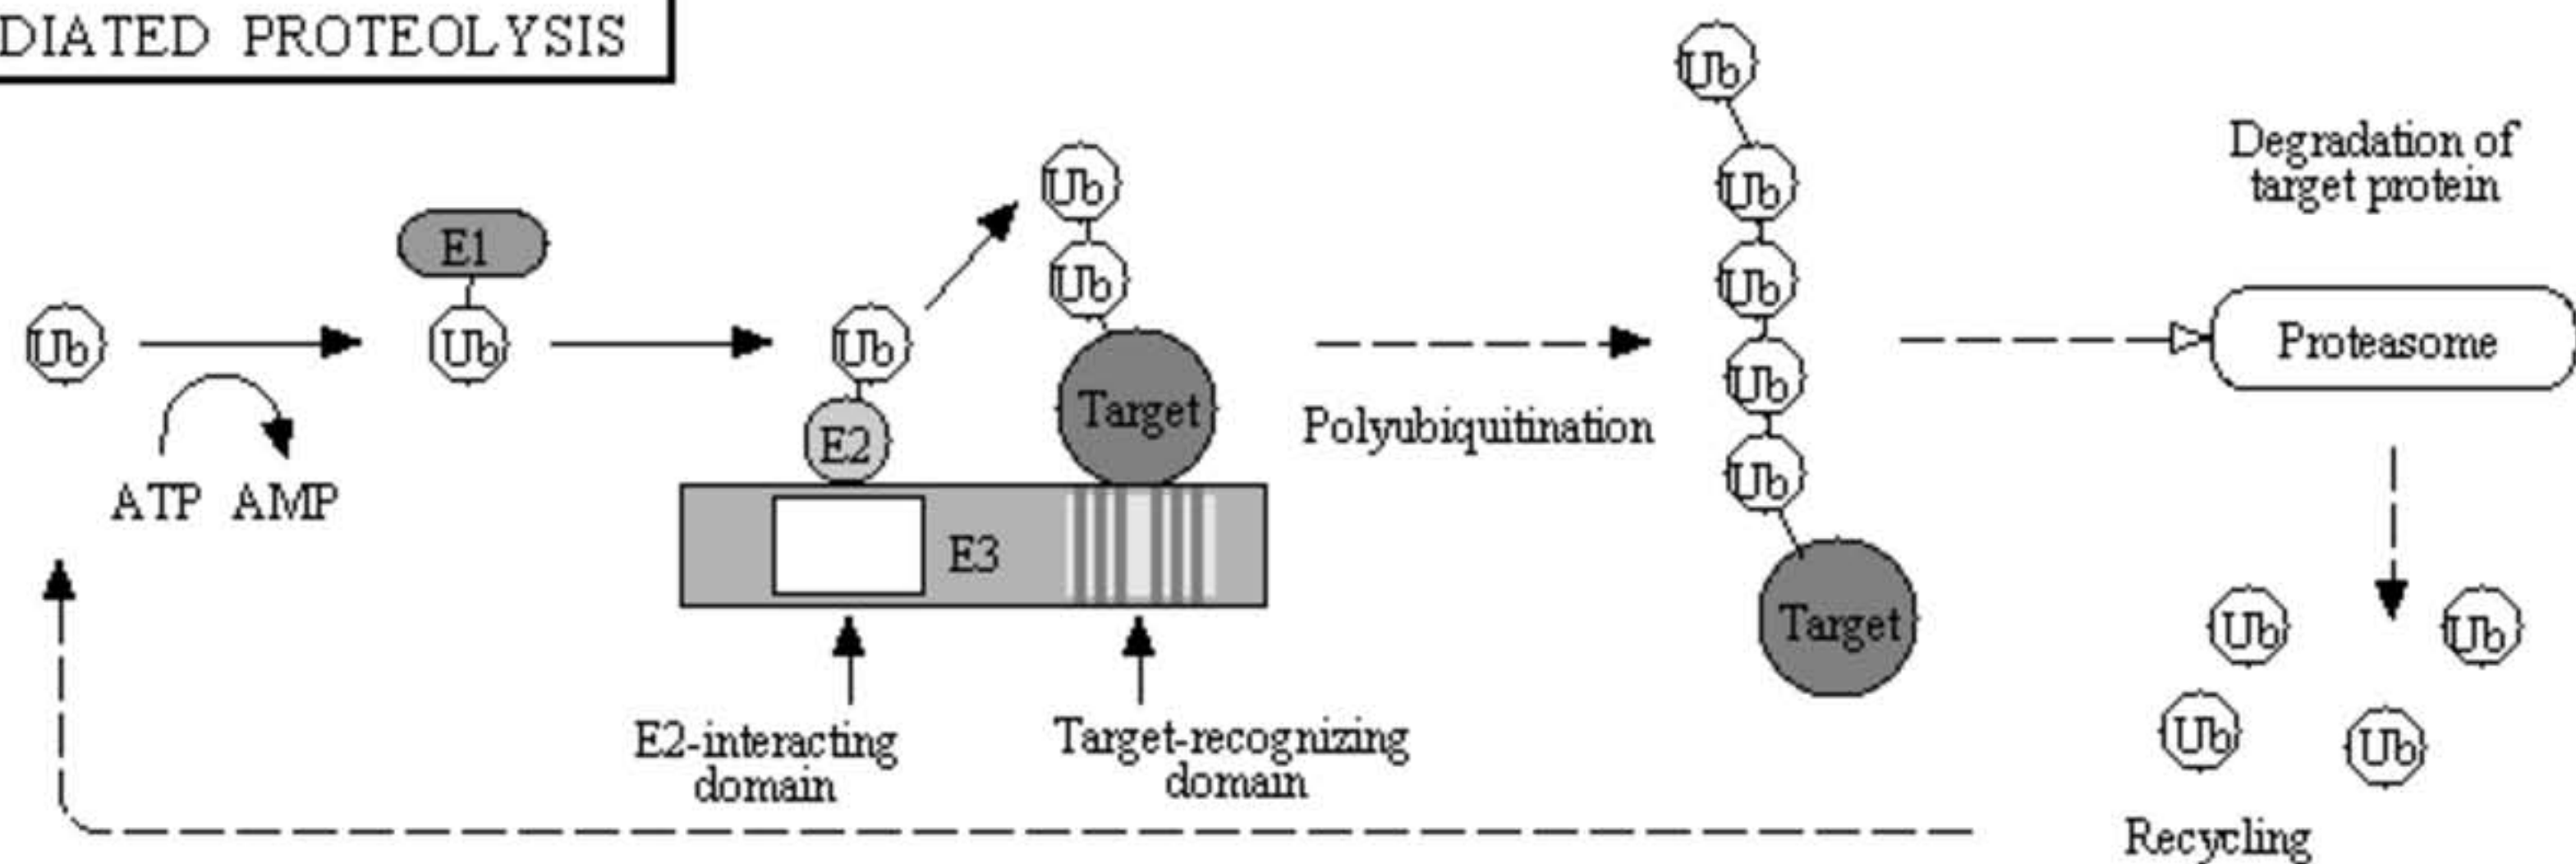

## E1 (Ubiquitin-activating enzyme)

UBE1 UBLE1A UBLE1B UBE1C

## E2 (Ubiquitin-conjugating enzyme)

UBE2A UBE2B UBE2C UBE2D UBE2E UBE2F UBE2G1 UBE2G2 UBE2H  
 UBE2I UBE2J1 UBE2J2 UBE2L3 UBE2L6 UBE2M UBE2N UBE2O  
 UBE2Q UBE2R UBE2S UBE2U UBE2W UBE2Z HIP2 AFCLCN

## E3 (Ubiquitin ligase)

### HECT type E3

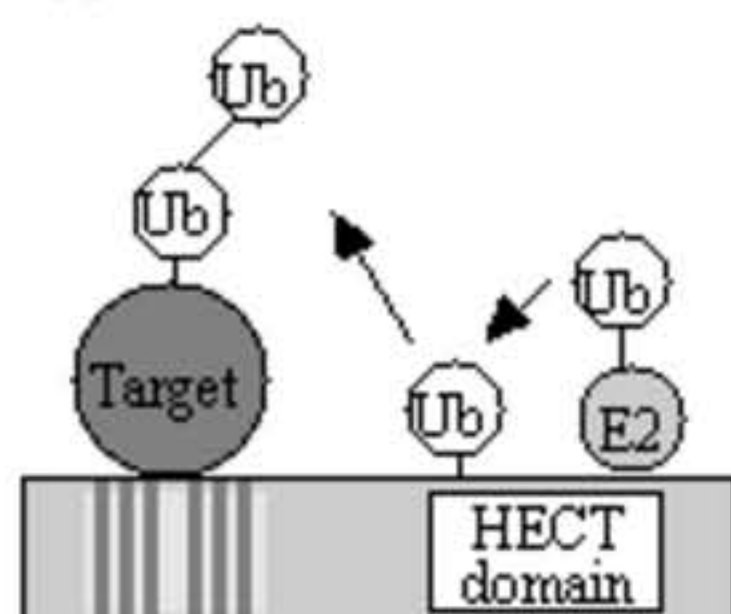

E6AP UBE3B UBE3C Smurf Itch  
 WWP1 WWP2 TRIP12 NEDD4 ARF-BP1  
 EDD1 HERC1 HERC2 HERC3 HERC4

### U-box type E3

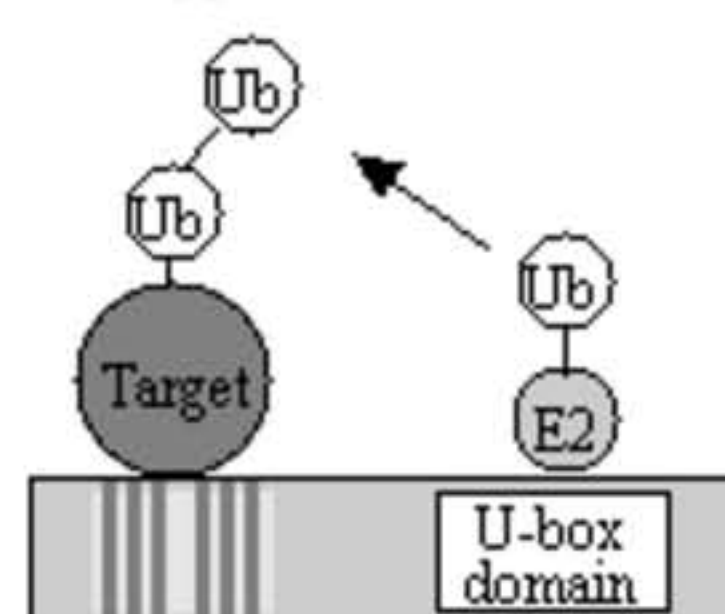

UBE4A UBE4B CHIP  
 CYC4 PRP19 UIP5

### single RING-finger type E3

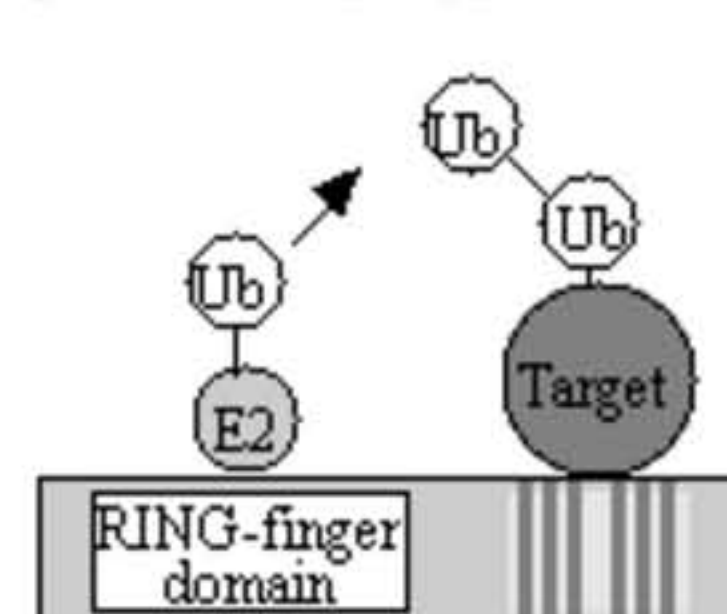

Mdm2 CBL Parkin SIAH-1 PML TRAF6 MEKK1  
 COP1 PIRH2 cIAPs PIAS SYVN NHLRC1 AIRE  
 MGRN1 BRCA1 FANCL MID1 Trim32 Trim37

### multi subunit RING-finger type E3

#### Cullin-Rbx E3

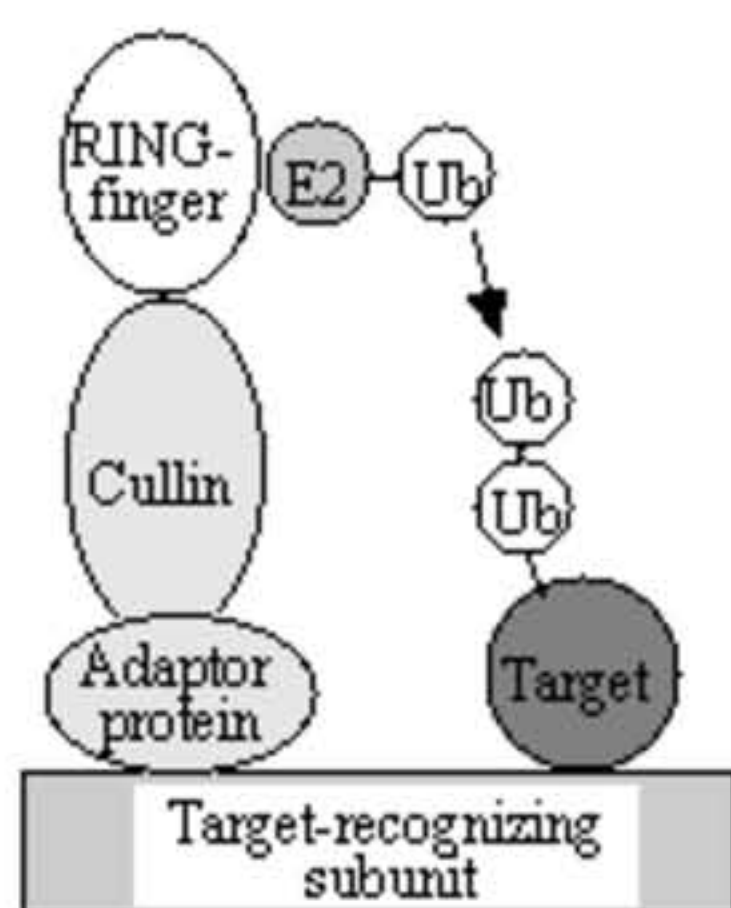

|              | RING finger | Cullin | Adaptor protein | Target recognizing subunit |
|--------------|-------------|--------|-----------------|----------------------------|
| SCF complex  | RBX1        | Cul1   | Skp1            | F-box                      |
| ECV complex  | RBX1        | Cul2   | EloB<br>EloC    | VHLbox                     |
| Cul3 complex | RBX1        | Cul3   |                 | BTB                        |
| Cul4 complex | RBX1        | Cul4   | DDB1            | DCAF                       |
| ECS complex  | RBX2        | Cul5   | EloB<br>EloC    | SOC3box                    |
| Cul7 complex | RBX1        | Cul7   | Skp1            | Fbxw8                      |

#### APC/C

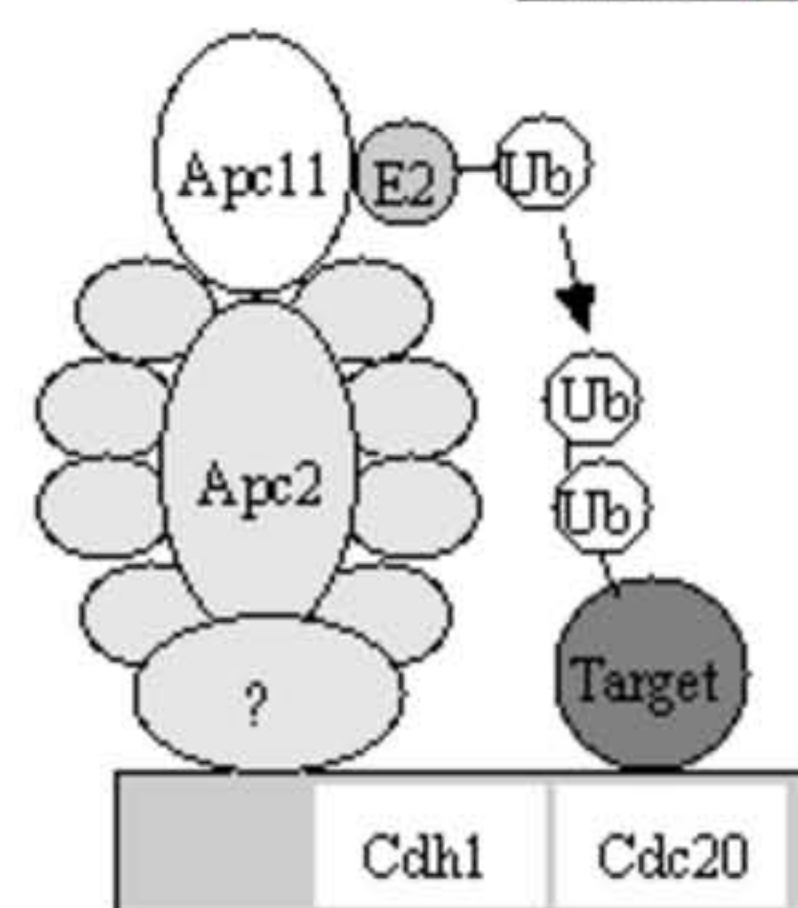

|       | RING finger | Cullin | Adaptor protein | Target recognizing subunit | Other subunits                                                           |
|-------|-------------|--------|-----------------|----------------------------|--------------------------------------------------------------------------|
| APC/C | Apc11       | Apc2   | ?               | Cdc20<br>Cdh1              | Apc1 Apc3<br>Apc4 Apc5<br>Apc6 Apc7<br>Apc8 Apc9<br>Apc10 Apc12<br>Apc13 |



# VALINE, LEUCINE AND ISOLEUCINE BIOSYNTHESIS

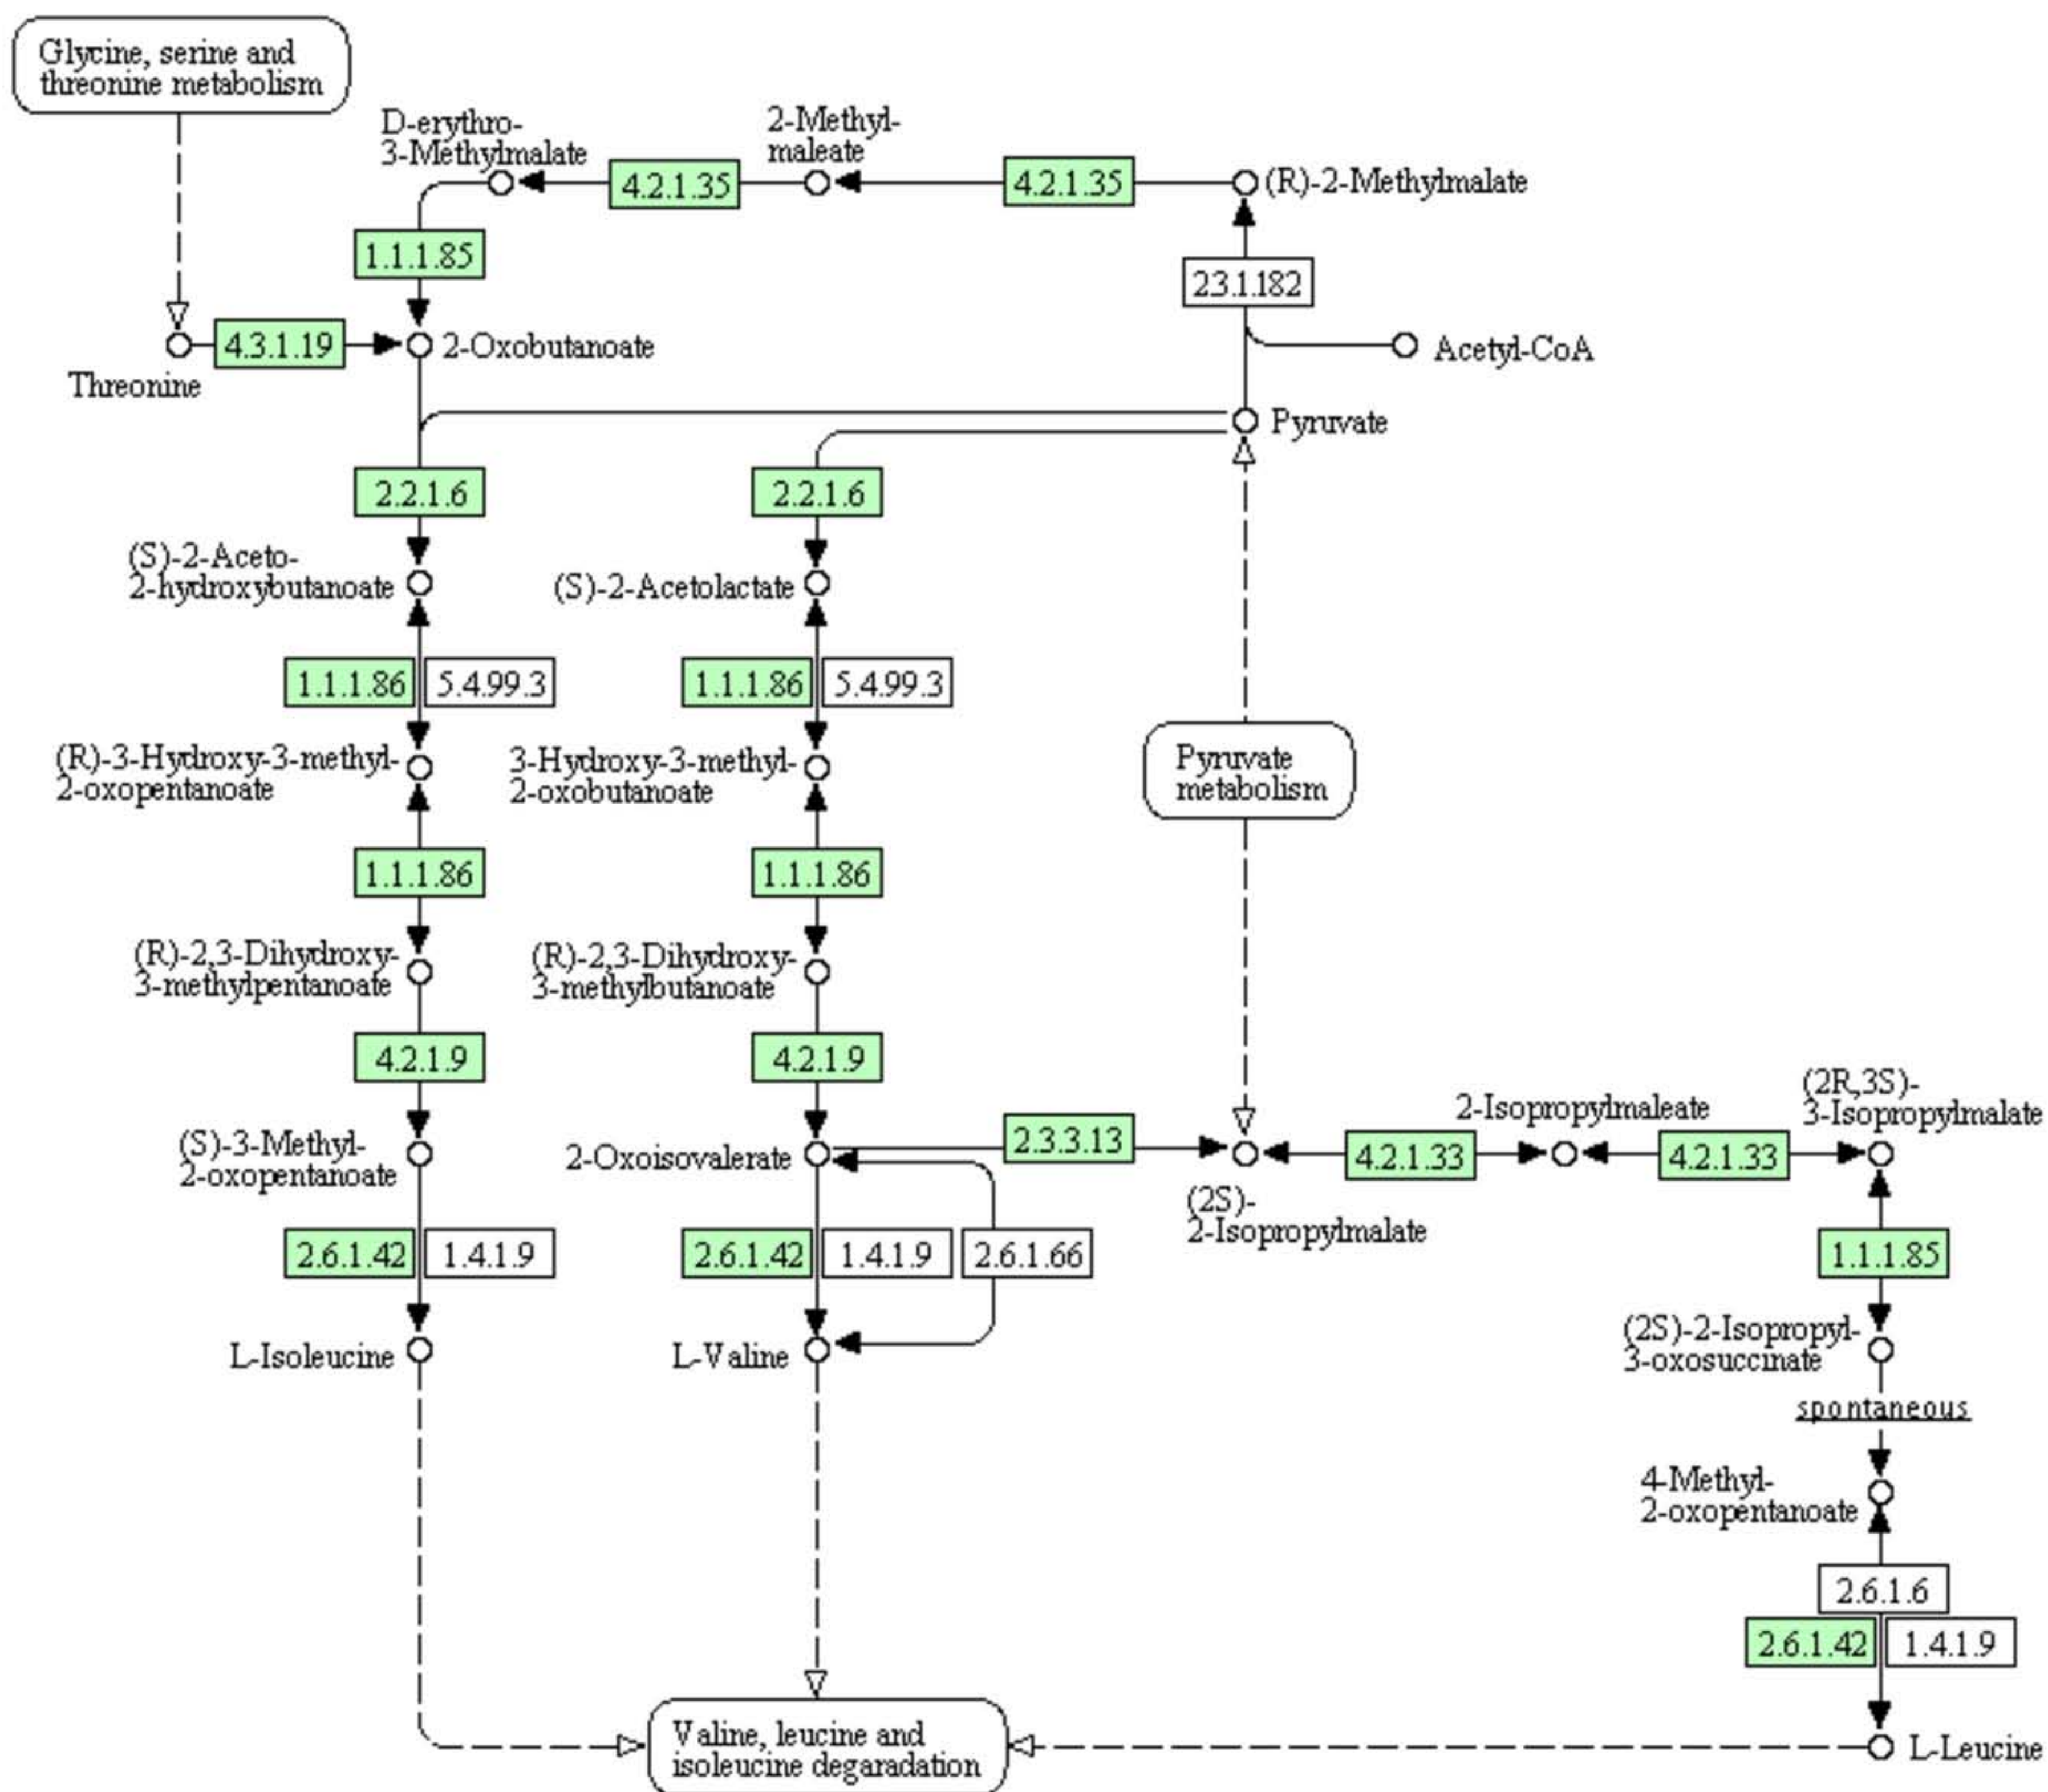



# VALINE, LEUCINE AND ISOLEUCINE DEGRADATION

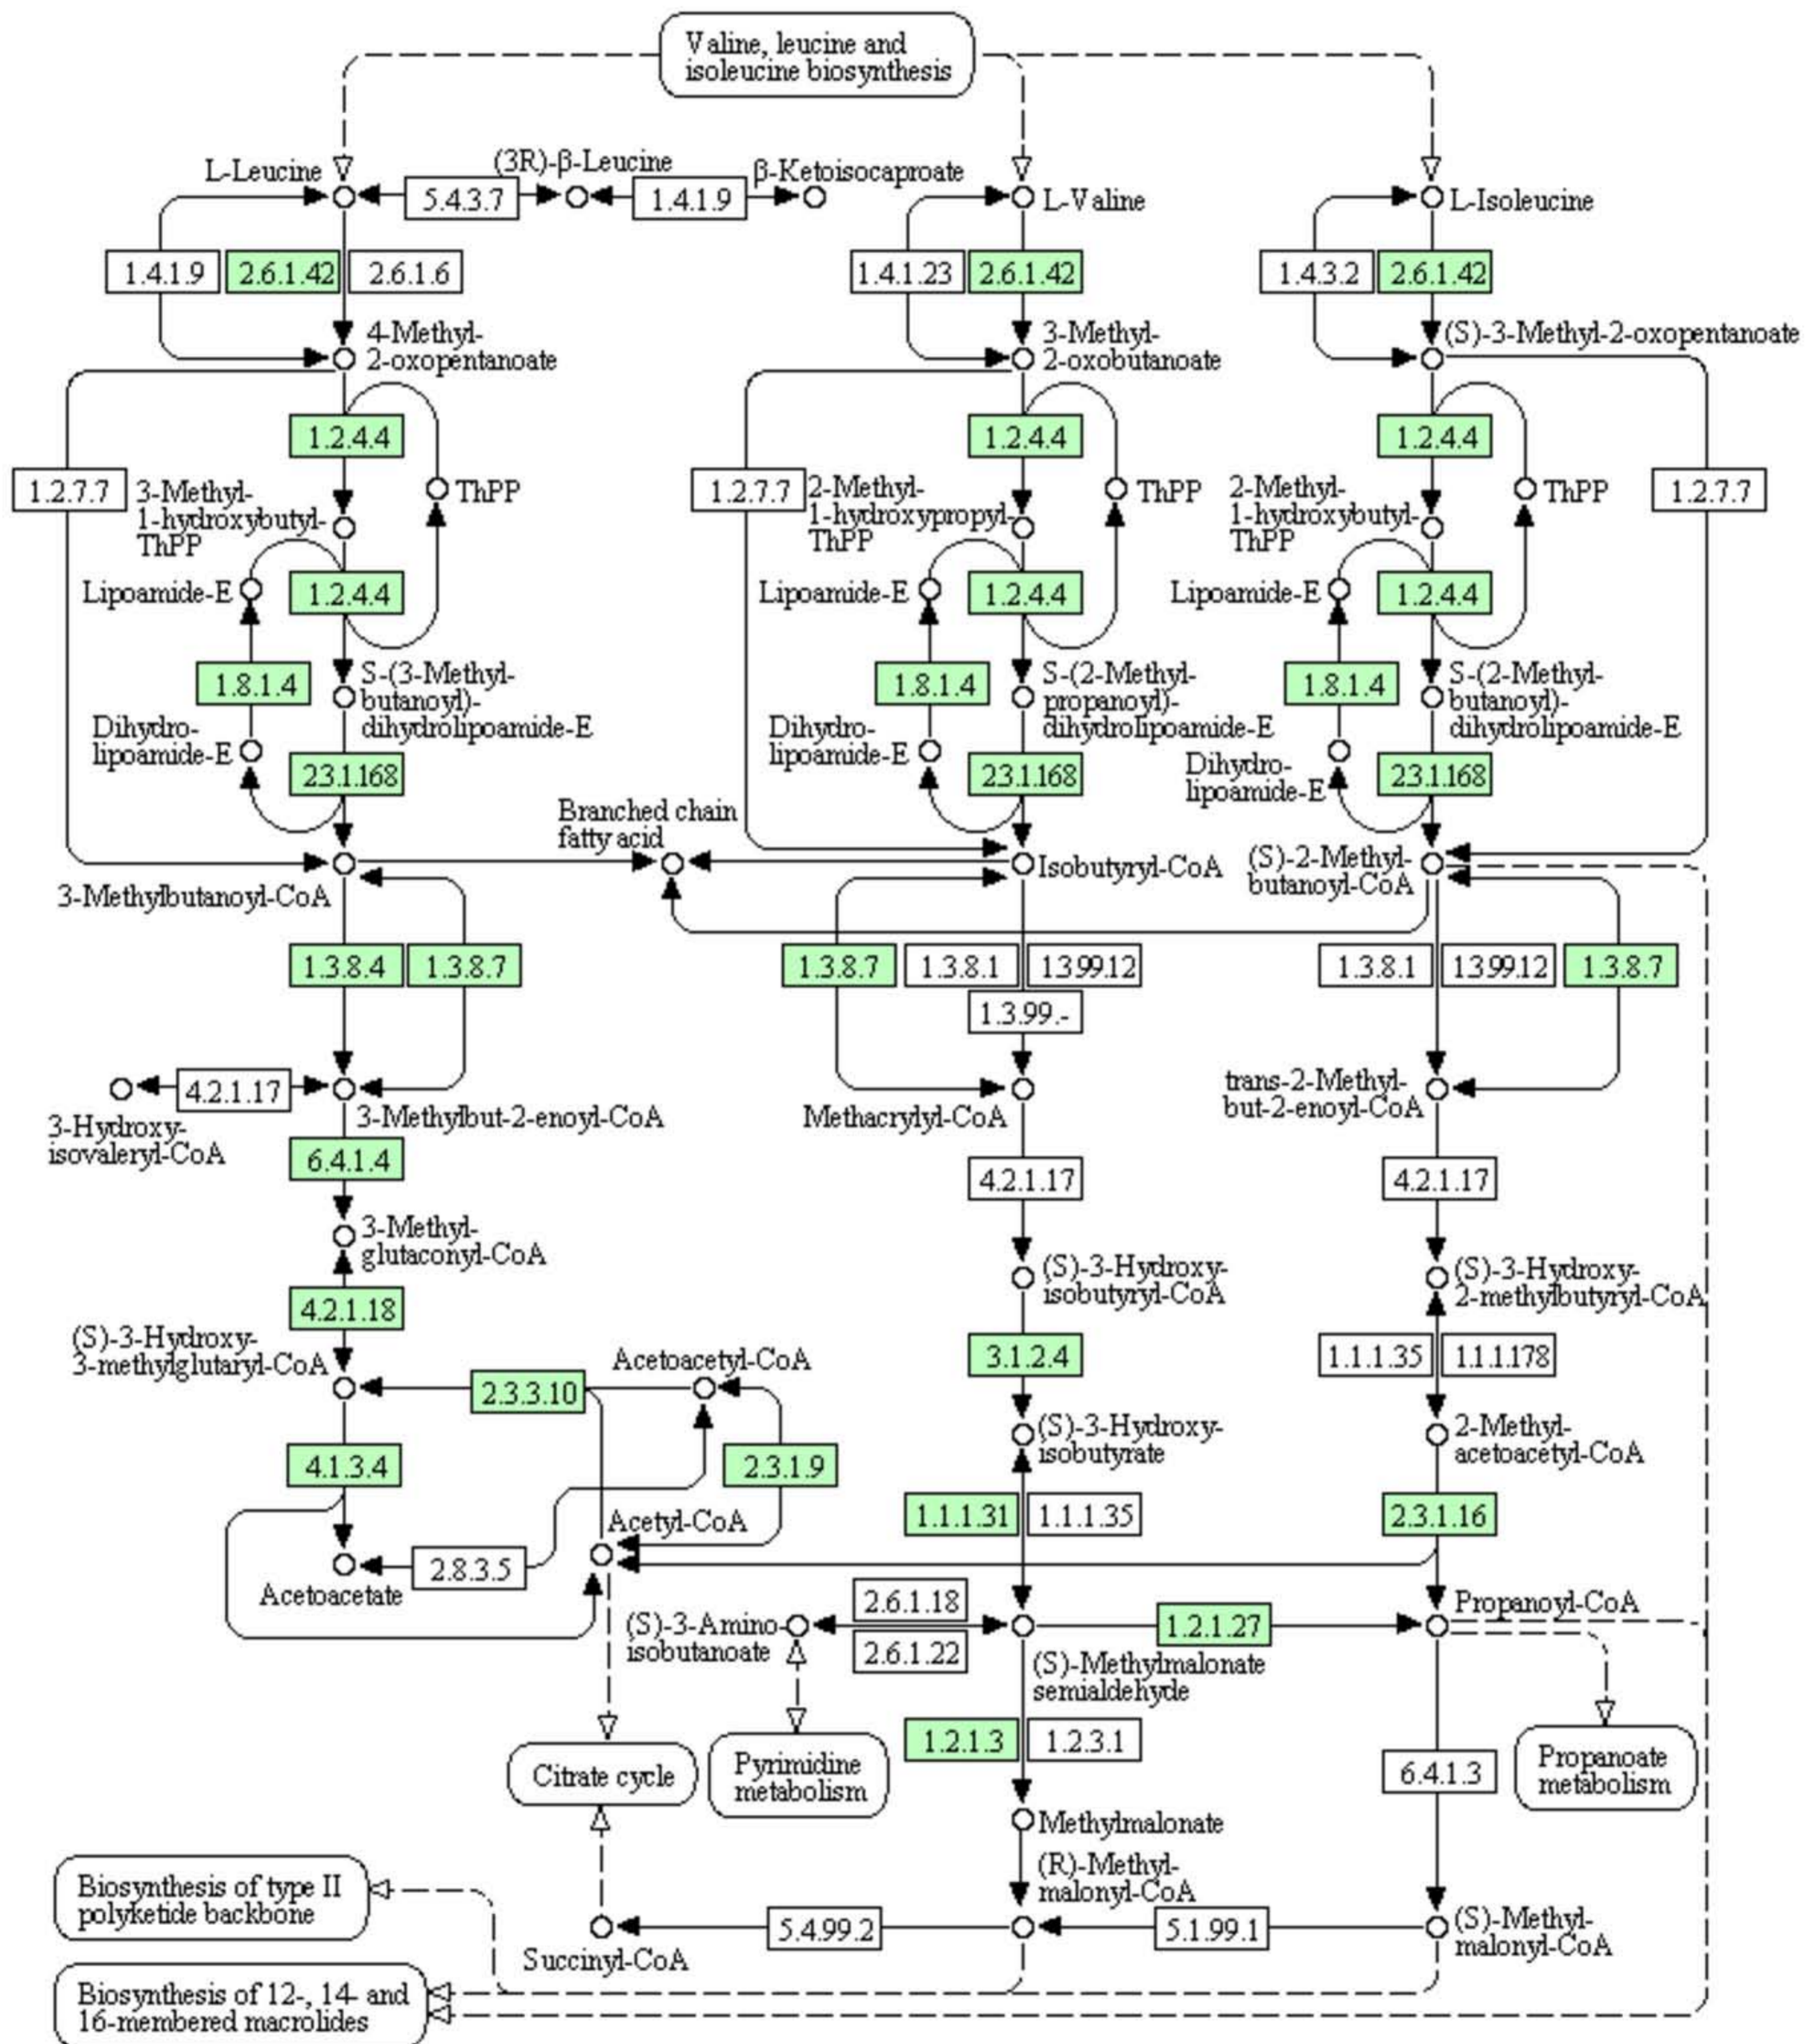











# WNT SIGNALING PATHWAY

## Canonical pathway

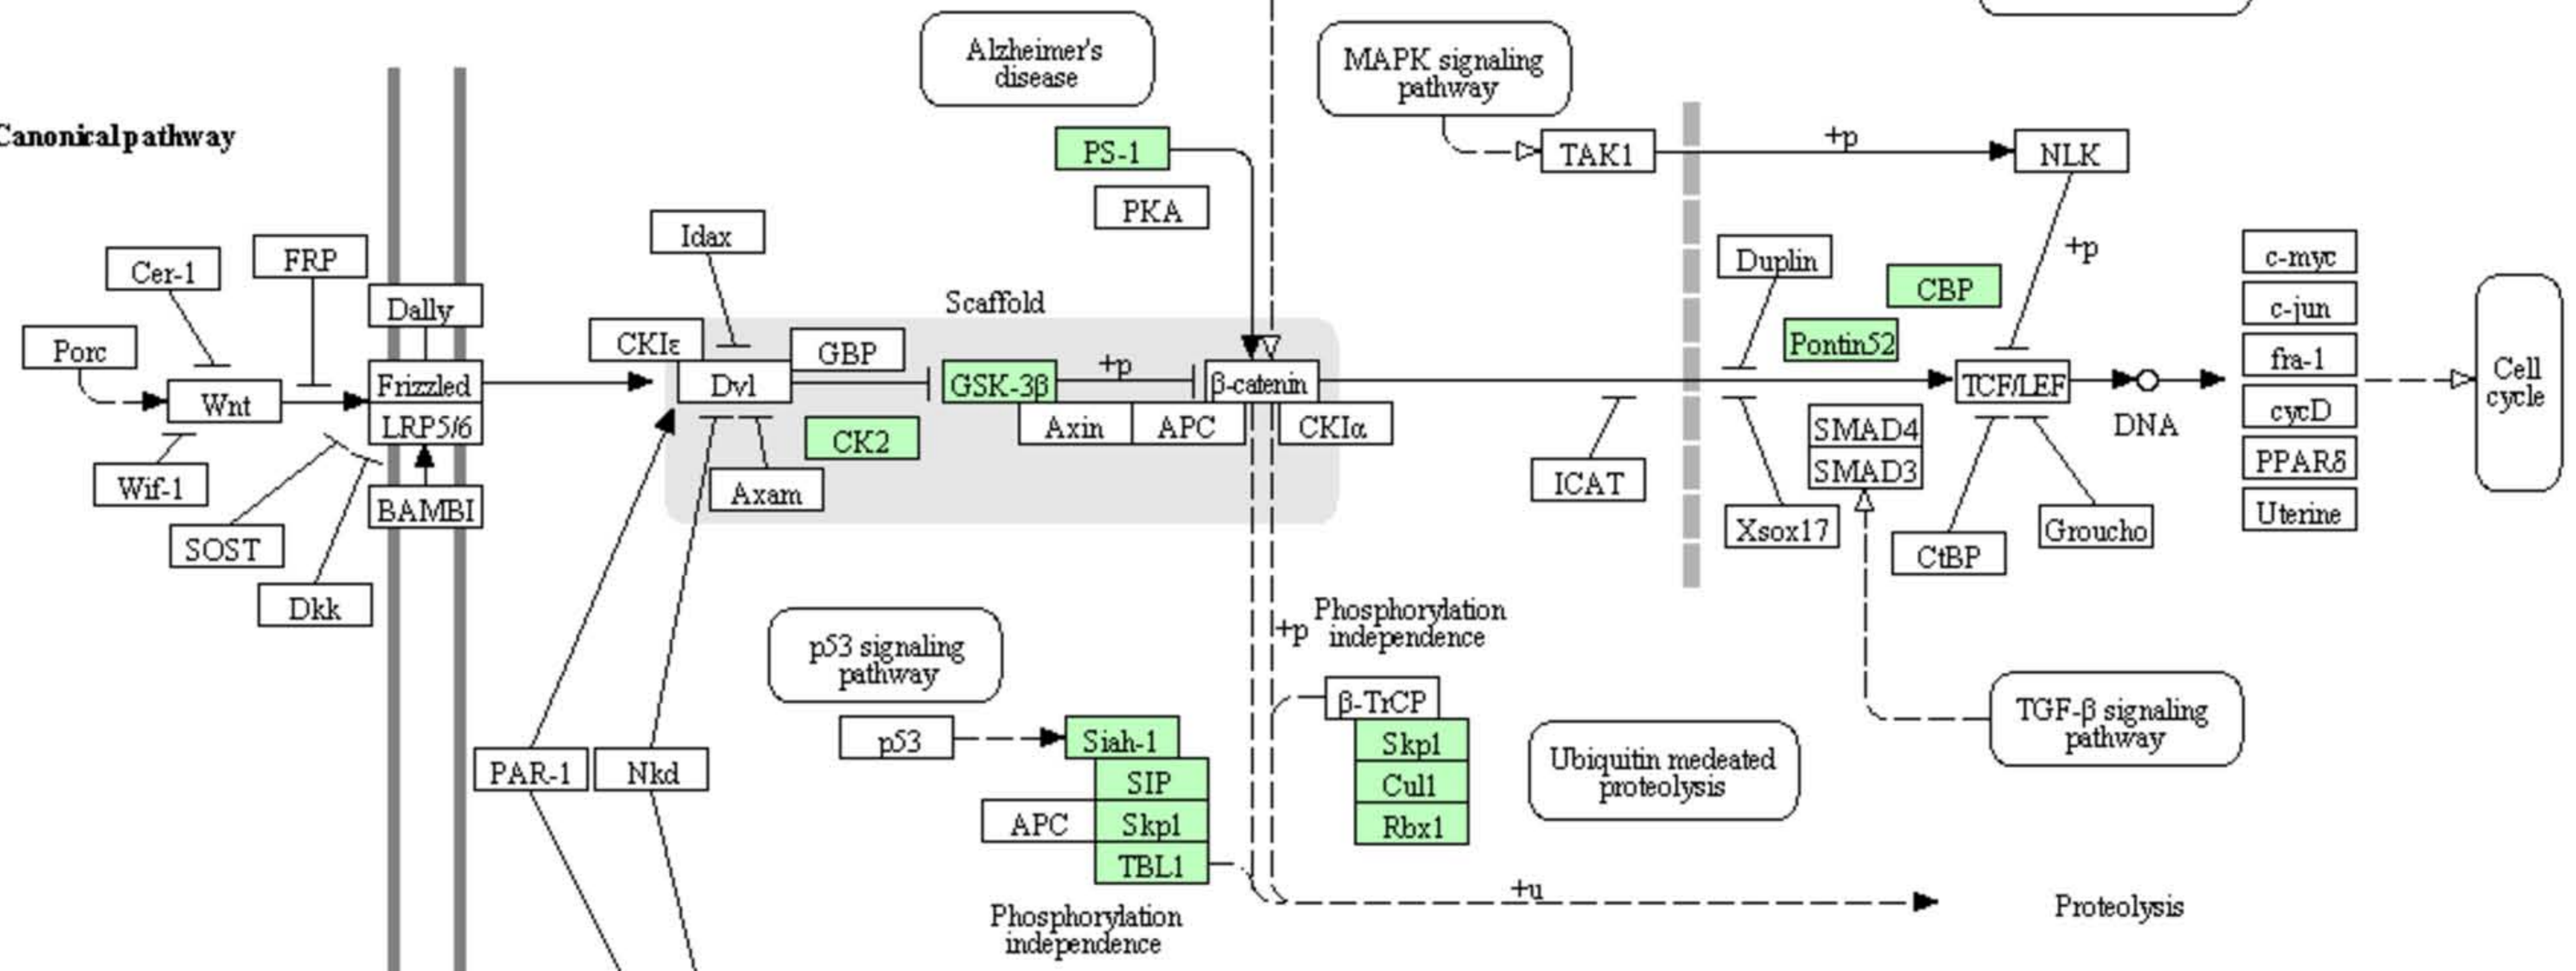

## Planar cell polarity (PCP) pathway

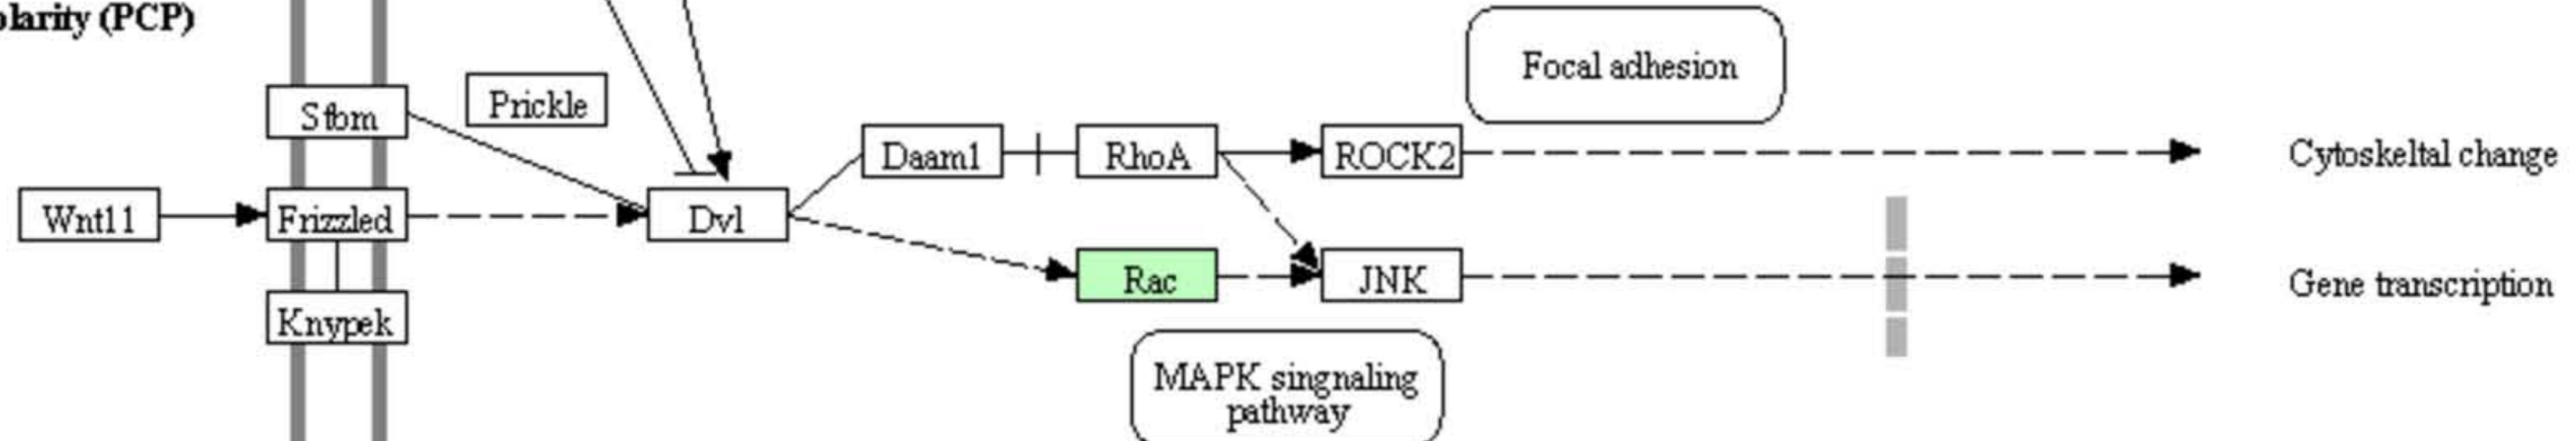

## Wnt/ Ca<sup>2+</sup> pathway

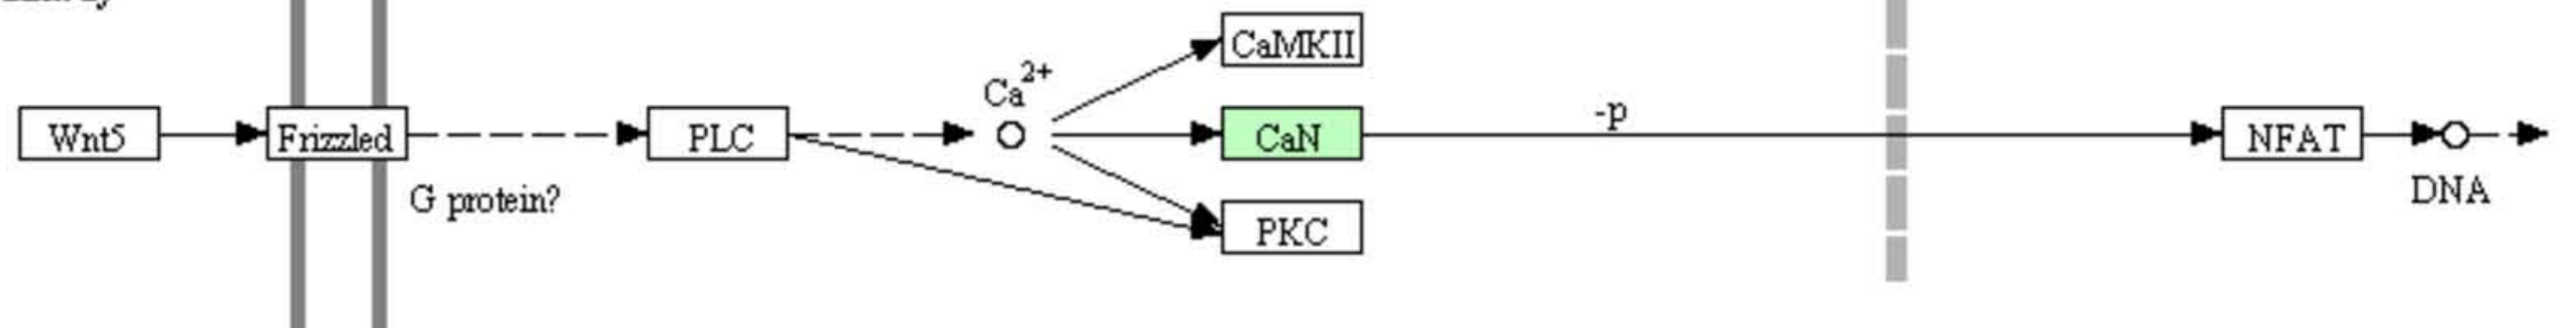

Supplement: pone.0109835.s031.pdf [file pone.0109835.s031.pdf]
