# Supplementary material for: Exploring the Genes of Yerba Mate (Ilex paraguariensis A. St.-Hil.) by NGS and De Novo Transcriptome Assembly
Source: PLoS One. 2014 Oct 16;9(10):e109835. doi: 10.1371/journal.pone.0109835 (PMC4199719; doi:10.1371/journal.pone.0109835)
Supplement: Table S2 — Gene Ontology terms associated to the yerba mate transcriptome. The GO terms were obtained employing the KAAS (KEGG Automatic Annotation Server, http://www.genome.jp/kegg/kaas/) for ortholog assignment and pathway mapping. (XLSX) [file pone.0109835.s019.xlsx]

## Sheet: Hoja1
GO annotation	#terms/seq
GO terms	2,336
GO Process	1,408
GO Function	646
GO cell com	282
GO-KEGG pathways	4,341
KEGG maps	315
Total GO hits	217.656
